# Supplementary material for: ZFP36 RNA-binding proteins restrain T cell activation and anti-viral immunity
Source: eLife. 2018 May 31;7:e33057. doi: 10.7554/eLife.33057 (PMC6033538; doi:10.7554/eLife.33057)
Supplement: Supplementary file 1. — Pan-ZFP36 HITS-CLIP peaks (A) in WT CD4 +T cells 4 hr post-activation (B) in Zfp36 KO CD4 +T cells 4 hr post-activation. (C) identified only in Zfp36 KO and not WT cells, and (D) pooled from WT and Zfp36 KO samples. (E) Cross-link induced truncation (CITS) cites from all pooled ZFP36 HITS-CLIP data (FDR < 0.01). [file elife-33057-supp1.xlsx]

## Sheet: A. CLIP, 4h, WT biological reps
pan-ZFP36 HITS-CLIP peaks in WT CD4+ T-cells
column	description
chr	chromosome
start	chromosome start coordinate
end	chromsome end coordinate
peak.ID	unique peak ID
PH	peak height; the peak amplitude at its heighest point
strand	chromosome strand
BC	biological complexity; the number of independent biological samples (mice or mice pools) supporting the peak (out of 5 total)
gene	ensembl ID gene annotation for peak site
Gene_name	entrez ID gene annotation for peak site
annotation	gene region annotation for peak site; multiple annotations separated by "I"
Gene_type	gene type in ensembl database
Gene_status	gene status in ensembl database
rRNA	overlapping rRNA genes
tRNA	overlapping tRNA gene
chr	start	end	peak.ID	PH	strand	BC	gene	Gene_name	annotation	Gene_type	Gene_status	rRNA	tRNA
chr3	108107608	108107638	14435[gene=ENSMUSG00000000001][PH=5][PH0=0.10][P=4.0e-04]	5	-	4	ENSMUSG00000000001	Gnai3	3'UTR	protein_coding	KNOWN	NA	NA
chr3	108107452	108107482	14428[gene=ENSMUSG00000000001][PH=5][PH0=0.10][P=4.0e-04]	5	-	2	ENSMUSG00000000001	Gnai3	3'UTR	protein_coding	KNOWN	NA	NA
chr3	108107868	108107898	14448[gene=ENSMUSG00000000001][PH=7][PH0=0.10][P=1.3e-07]	7	-	3	ENSMUSG00000000001	Gnai3	3'UTR	protein_coding	KNOWN	NA	NA
chr13	5870355	5870385	316[gene=ENSMUSG00000000078][PH=8][PH0=0.17][P=5.1e-08]	8	+	3	ENSMUSG00000000078	Klf6	3'UTR	protein_coding	KNOWN	NA	NA
chr13	5869220	5869250	261[gene=ENSMUSG00000000078][PH=9][PH0=0.17][P=1.1e-09]	9	+	3	ENSMUSG00000000078	Klf6	3'UTR	protein_coding	KNOWN	NA	NA
chr13	5868963	5868993	238[gene=ENSMUSG00000000078][PH=7][PH0=0.17][P=2.1e-06]	7	+	3	ENSMUSG00000000078	Klf6	3'UTR	protein_coding	KNOWN	NA	NA
chr9	57529038	57529068	13672[gene=ENSMUSG00000000088][PH=4][PH0=0.05][P=4.1e-04]	4	+	3	ENSMUSG00000000088	Cox5a	CDS	protein_coding	KNOWN	NA	NA
chrX	7774957	7774987	142[gene=ENSMUSG00000000134][PH=5][PH0=0.03][P=3.3e-07]	5	+	4	ENSMUSG00000000134	Tfe3	3'UTR	protein_coding	KNOWN	NA	NA
chr11	108949733	108949763	34843[gene=ENSMUSG00000000142][PH=3][PH0=0.01][P=1.2e-03]	3	+	3	ENSMUSG00000000142	Axin2	3'UTR	protein_coding	KNOWN	NA	NA
chr9	50635981	50636011	8686[gene=ENSMUSG00000000168][PH=4][PH0=0.06][P=1.4e-03]	4	-	2	ENSMUSG00000000168	Dlat	3'UTR	protein_coding	KNOWN	NA	NA
chr9	50636361	50636391	8717[gene=ENSMUSG00000000168][PH=4][PH0=0.06][P=1.4e-03]	4	-	3	ENSMUSG00000000168	Dlat	3'UTR	protein_coding	KNOWN	NA	NA
chr9	50636287	50636317	8709[gene=ENSMUSG00000000168][PH=5][PH0=0.06][P=2.0e-05]	5	-	3	ENSMUSG00000000168	Dlat	3'UTR	protein_coding	KNOWN	NA	NA
chr9	50635815	50635845	8672[gene=ENSMUSG00000000168][PH=8][PH0=0.06][P=1.6e-11]	8	-	3	ENSMUSG00000000168	Dlat	3'UTR	protein_coding	KNOWN	NA	NA
chr9	50636223	50636253	8697[gene=ENSMUSG00000000168][PH=7][PH0=0.06][P=2.1e-09]	7	-	5	ENSMUSG00000000168	Dlat	3'UTR	protein_coding	KNOWN	NA	NA
chr9	50596466	50596496	8606[gene=ENSMUSG00000000171][PH=4][PH0=0.03][P=8.1e-05]	4	-	4	ENSMUSG00000000171	Sdhd	3'UTR	protein_coding	KNOWN	NA	NA
chr6	127128593	127128623	25320[gene=ENSMUSG00000000184][PH=102][PH0=1.09][P=2.1e-13]	102	-	5	ENSMUSG00000000184	Ccnd2	3'UTR	protein_coding	KNOWN	NA	NA
chr6	127128186	127128216	25164[gene=ENSMUSG00000000184][PH=10][PH0=1.09][P=1.8e-03]	10	-	4	ENSMUSG00000000184	Ccnd2	3'UTR	protein_coding	KNOWN	NA	NA
chr6	127129543	127129573	25479[gene=ENSMUSG00000000184][PH=18][PH0=1.09][P=3.8e-12]	18	-	5	ENSMUSG00000000184	Ccnd2	3'UTR	protein_coding	KNOWN	NA	NA
chr6	127127491	127127521	25110[gene=ENSMUSG00000000184][PH=15][PH0=1.09][P=1.1e-08]	15	-	5	ENSMUSG00000000184	Ccnd2	3'UTR	protein_coding	KNOWN	NA	NA
chr6	127150786	127150816	25872[gene=ENSMUSG00000000184][PH=24][PH0=1.09][P=2.1e-13]	24	-	4	ENSMUSG00000000184	Ccnd2	5'UTR	protein_coding	KNOWN	NA	NA
chr6	127129946	127129976	25544[gene=ENSMUSG00000000184][PH=14][PH0=1.09][P=1.5e-07]	14	-	5	ENSMUSG00000000184	Ccnd2	3'UTR	protein_coding	KNOWN	NA	NA
chr6	127126740	127126770	25050[gene=ENSMUSG00000000184][PH=11][PH0=1.09][P=1.9e-04]	11	-	4	ENSMUSG00000000184	Ccnd2	3'UTR	protein_coding	KNOWN	NA	NA
chr6	127130036	127130066	25597[gene=ENSMUSG00000000184][PH=153][PH0=1.09][P=2.1e-13]	153	-	5	ENSMUSG00000000184	Ccnd2	3'UTR	protein_coding	KNOWN	NA	NA
chr6	127126055	127126085	24994[gene=ENSMUSG00000000184][PH=14][PH0=1.09][P=1.5e-07]	14	-	5	ENSMUSG00000000184	Ccnd2	3'UTR	protein_coding	KNOWN	NA	NA
chr6	127130137	127130167	25656[gene=ENSMUSG00000000184][PH=35][PH0=1.09][P=2.1e-13]	35	-	5	ENSMUSG00000000184	Ccnd2	3'UTR	protein_coding	KNOWN	NA	NA
chr6	127128798	127128828	25403[gene=ENSMUSG00000000184][PH=17][PH0=1.09][P=5.7e-11]	17	-	5	ENSMUSG00000000184	Ccnd2	3'UTR	protein_coding	KNOWN	NA	NA
chr6	127128728	127128758	25373[gene=ENSMUSG00000000184][PH=48][PH0=1.09][P=2.1e-13]	48	-	5	ENSMUSG00000000184	Ccnd2	3'UTR	protein_coding	KNOWN	NA	NA
chr11	89019237	89019267	28719[gene=ENSMUSG00000000275][PH=5][PH0=0.05][P=7.9e-06]	5	+	2	ENSMUSG00000000275	Trim25	3'UTR	protein_coding	KNOWN	NA	NA
chr11	89039682	89039712	27789[gene=ENSMUSG00000000276][PH=5][PH0=0.03][P=1.2e-06]	5	-	2	ENSMUSG00000000276	Dgke	3'UTR	protein_coding	KNOWN	NA	NA
chr11	74844333	74844363	21236[gene=ENSMUSG00000000282][PH=10][PH0=0.07][P=1.0e-100]	10	+	5	ENSMUSG00000000282	Mnt	3'UTR	protein_coding	KNOWN	NA	NA
chr11	74844649	74844679	21260[gene=ENSMUSG00000000282][PH=7][PH0=0.07][P=6.9e-09]	7	+	4	ENSMUSG00000000282	Mnt	3'UTR	protein_coding	KNOWN	NA	NA
chr10	77565581	77565611	15902[gene=ENSMUSG00000000290][PH=29][PH0=0.10][P=1.3e-13]	29	+	5	ENSMUSG00000000290	Itgb2	3'UTR	protein_coding	KNOWN	NA	NA
chr2	179587670	179587700	40148[gene=ENSMUSG00000000305][PH=9][PH0=0.00][P=1.0e-100]	9	+	2	ENSMUSG00000000305	Cdh4	intron	protein_coding	KNOWN	NA	NA
chr3	116548595	116548625	24082[gene=ENSMUSG00000000340][PH=3][PH0=0.02][P=4.4e-03]	3	+	3	ENSMUSG00000000340	Dbt	3'UTR	protein_coding	KNOWN	NA	NA
chr3	116549112	116549142	24092[gene=ENSMUSG00000000340][PH=4][PH0=0.02][P=2.8e-05]	4	+	1	ENSMUSG00000000340	Dbt	3'UTR	protein_coding	KNOWN	NA	NA
chr15	100620095	100620125	17028[gene=ENSMUSG00000000346][PH=4][PH0=0.07][P=1.3e-03]	4	+	3	ENSMUSG00000000346	Dazap2	3'UTR	protein_coding	KNOWN	NA	NA
chr10	78187127	78187157	14827[gene=ENSMUSG00000000374][PH=11][PH0=0.03][P=1.0e-100]	11	-	4	ENSMUSG00000000374	Trappc10	3'UTR	protein_coding	KNOWN	NA	NA
chr10	78186847	78186877	14806[gene=ENSMUSG00000000374][PH=10][PH0=0.03][P=1.0e-100]	10	-	4	ENSMUSG00000000374	Trappc10	3'UTR	protein_coding	KNOWN	NA	NA
chr11	6618038	6618068	2951[gene=ENSMUSG00000000384][PH=4][PH0=0.08][P=2.9e-03]	4	-	3	ENSMUSG00000000384	Tbrg4	3'UTR|CDS	protein_coding	KNOWN	NA	NA
chr4	129550766	129550796	17791[gene=ENSMUSG00000000409][PH=4][PH0=0.07][P=3.3e-03]	4	-	1	ENSMUSG00000000409	Lck	intron	protein_coding	KNOWN	NA	NA
chr4	129568890	129568920	17874[gene=ENSMUSG00000000409][PH=4][PH0=0.07][P=3.3e-03]	4	-	2	ENSMUSG00000000409	Lck	downstream 10K|intron	protein_coding	KNOWN	NA	NA
chr18	24285254	24285284	4523[gene=ENSMUSG00000000420][PH=4][PH0=0.04][P=1.2e-03]	4	+	3	ENSMUSG00000000420	Galnt1	3'UTR	protein_coding	KNOWN	NA	NA
chr18	24238325	24238355	4446[gene=ENSMUSG00000000420][PH=19][PH0=0.04][P=1.0e-100]	19	+	5	ENSMUSG00000000420	Galnt1	5'UTR	protein_coding	KNOWN	NA	NA
chr18	24286060	24286090	4532[gene=ENSMUSG00000000420][PH=5][PH0=0.04][P=1.3e-05]	5	+	3	ENSMUSG00000000420	Galnt1	3'UTR	protein_coding	KNOWN	NA	NA
chr6	115618613	115618643	18479[gene=ENSMUSG00000000439][PH=9][PH0=0.02][P=1.0e-100]	9	+	4	ENSMUSG00000000439	Mkrn2	3'UTR	protein_coding	KNOWN	NA	NA
chr6	115618625	115618655	21438[gene=ENSMUSG00000000441][PH=5][PH0=0.05][P=1.7e-05]	5	-	3	ENSMUSG00000000441	Raf1	3'UTR	protein_coding	KNOWN	NA	NA
chr15	79995885	79995915	16614[gene=ENSMUSG00000000489][PH=59][PH0=0.09][P=8.5e-14]	59	-	5	ENSMUSG00000000489	Pdgfb	3'UTR	protein_coding	KNOWN	NA	NA
chr15	101232168	101232198	17158[gene=ENSMUSG00000000531][PH=5][PH0=0.07][P=4.0e-05]	5	+	1	ENSMUSG00000000531	Grasp	3'UTR	protein_coding	KNOWN	NA	NA
chr15	101232054	101232084	17145[gene=ENSMUSG00000000531][PH=24][PH0=0.07][P=1.0e-100]	24	+	5	ENSMUSG00000000531	Grasp	3'UTR	protein_coding	KNOWN	NA	NA
chr15	101212310	101212340	17115[gene=ENSMUSG00000000532][PH=3][PH0=0.02][P=6.2e-03]	3	+	1	ENSMUSG00000000532	Acvr1b	3'UTR	protein_coding	KNOWN	NA	NA
chr15	103344301	103344331	23190[gene=ENSMUSG00000000555][PH=3][PH0=0.01][P=1.1e-03]	3	-	2	ENSMUSG00000000555	Itga5	3'UTR	protein_coding	KNOWN	NA	NA
chr3	105967755	105967785	22608[gene=ENSMUSG00000000561][PH=7][PH0=0.05][P=1.2e-09]	7	+	4	ENSMUSG00000000561	Wdr77	3'UTR|intron	protein_coding	KNOWN	NA	NA
chr3	105942707	105942737	12790[gene=ENSMUSG00000000563][PH=5][PH0=0.04][P=4.1e-06]	5	-	3	ENSMUSG00000000563	Atp5f1	3'UTR	protein_coding	KNOWN	NA	NA
chr5	99962515	99962545	13728[gene=ENSMUSG00000000568][PH=5][PH0=0.20][P=8.3e-03]	5	-	3	ENSMUSG00000000568	Hnrnpd	3'UTR|CDS	protein_coding	KNOWN	NA	NA
chr5	99964055	99964085	13756[gene=ENSMUSG00000000568][PH=7][PH0=0.20][P=1.1e-05]	7	-	4	ENSMUSG00000000568	Hnrnpd	3'UTR|CDS	protein_coding	KNOWN	NA	NA
chr5	99961054	99961084	13670[gene=ENSMUSG00000000568][PH=12][PH0=0.20][P=9.0e-14]	12	-	5	ENSMUSG00000000568	Hnrnpd	3'UTR	protein_coding	KNOWN	NA	NA
chr5	99961227	99961257	13698[gene=ENSMUSG00000000568][PH=12][PH0=0.20][P=9.0e-14]	12	-	5	ENSMUSG00000000568	Hnrnpd	3'UTR	protein_coding	KNOWN	NA	NA
chr5	3806208	3806238	418[gene=ENSMUSG00000000600][PH=4][PH0=0.07][P=5.1e-03]	4	+	3	ENSMUSG00000000600	Krit1	intron	protein_coding	KNOWN	NA	NA
chr5	3841218	3841248	531[gene=ENSMUSG00000000600][PH=4][PH0=0.07][P=5.1e-03]	4	+	2	ENSMUSG00000000600	Krit1	3'UTR	protein_coding	KNOWN	NA	NA
chr6	82726629	82726659	11434[gene=ENSMUSG00000000628][PH=4][PH0=0.03][P=3.0e-04]	4	-	1	ENSMUSG00000000628	Hk2	3'UTR	protein_coding	KNOWN	NA	NA
chr6	82727205	82727235	11445[gene=ENSMUSG00000000628][PH=5][PH0=0.03][P=2.5e-06]	5	-	2	ENSMUSG00000000628	Hk2	3'UTR	protein_coding	KNOWN	NA	NA
chr6	82725078	82725108	11397[gene=ENSMUSG00000000628][PH=4][PH0=0.03][P=3.0e-04]	4	-	3	ENSMUSG00000000628	Hk2	3'UTR	protein_coding	KNOWN	NA	NA
chr6	82725889	82725919	11416[gene=ENSMUSG00000000628][PH=6][PH0=0.03][P=1.6e-08]	6	-	2	ENSMUSG00000000628	Hk2	3'UTR|intron	protein_coding	KNOWN	NA	NA
chr4	134093621	134093651	20500[gene=ENSMUSG00000000682][PH=3][PH0=0.01][P=7.0e-04]	3	-	2	ENSMUSG00000000682	Cd52	3'UTR|intron	protein_coding	KNOWN	NA	NA
chr10	128677178	128677208	24330[gene=ENSMUSG00000000711][PH=3][PH0=0.02][P=4.7e-03]	3	-	2	ENSMUSG00000000711	Rab5b	3'UTR	protein_coding	KNOWN	NA	NA
chr8	123103072	123103102	23099[gene=ENSMUSG00000092329][PH=348][PH0=0.01][P=1.0e-100]	348	+	5	ENSMUSG00000000740	Rpl13	downstream 10K|intron	protein_coding	KNOWN	NA	NA
chr8	12614856	12614886	1176[gene=ENSMUSG00000000759][PH=9][PH0=0.02][P=1.0e-100]	9	-	4	ENSMUSG00000000759	Tubgcp3	3'UTR	protein_coding	KNOWN	NA	NA
chr10	6771481	6771511	594[gene=ENSMUSG00000000766][PH=7][PH0=0.01][P=8.5e-13]	7	+	3	ENSMUSG00000000766	Oprm1	intron	protein_coding	KNOWN	NA	NA
chr14	70439099	70439129	11455[gene=ENSMUSG00000000776][PH=10][PH0=0.12][P=7.3e-13]	10	-	3	ENSMUSG00000000776	Polr3d	3'UTR	protein_coding	KNOWN	NA	NA
chr14	70439182	70439212	11481[gene=ENSMUSG00000000776][PH=21][PH0=0.12][P=1.0e-100]	21	-	5	ENSMUSG00000000776	Polr3d	3'UTR	protein_coding	KNOWN	NA	NA
chr11	52253150	52253180	13867[gene=ENSMUSG00000097219][PH=5][PH0=0.04][P=2.8e-05]	5	-	3	ENSMUSG00000000782	Tcf7	3'UTR|intron	protein_coding	KNOWN	NA	NA
chr11	52257013	52257043	13938[gene=ENSMUSG00000097219][PH=4][PH0=0.04][P=3.0e-03]	4	-	2	ENSMUSG00000000782	Tcf7	CDS|intron	protein_coding	KNOWN	NA	NA
chr11	52252628	52252658	13842[gene=ENSMUSG00000097219][PH=11][PH0=0.04][P=1.0e-100]	11	-	4	ENSMUSG00000000782	Tcf7	3'UTR|intron	protein_coding	KNOWN	NA	NA
chrX	13293380	13293410	1098[gene=ENSMUSG00000000787][PH=13][PH0=0.27][P=1.4e-13]	13	+	3	ENSMUSG00000000787	Ddx3x	3'UTR	protein_coding	KNOWN	NA	NA
chrX	13293829	13293859	1136[gene=ENSMUSG00000000787][PH=6][PH0=0.27][P=1.4e-03]	6	+	3	ENSMUSG00000000787	Ddx3x	3'UTR	protein_coding	KNOWN	NA	NA
chrX	13292387	13292417	1010[gene=ENSMUSG00000000787][PH=6][PH0=0.27][P=1.4e-03]	6	+	2	ENSMUSG00000000787	Ddx3x	3'UTR	protein_coding	KNOWN	NA	NA
chrX	13292589	13292619	1038[gene=ENSMUSG00000000787][PH=14][PH0=0.27][P=6.8e-14]	14	+	4	ENSMUSG00000000787	Ddx3x	3'UTR	protein_coding	KNOWN	NA	NA
chrX	13292881	13292911	1061[gene=ENSMUSG00000000787][PH=8][PH0=0.27][P=2.4e-06]	8	+	3	ENSMUSG00000000787	Ddx3x	3'UTR	protein_coding	KNOWN	NA	NA
chr11	84985240	84985270	24125[gene=ENSMUSG00000000804][PH=3][PH0=0.01][P=5.2e-03]	3	-	1	ENSMUSG00000000804	Usp32	3'UTR	protein_coding	KNOWN	NA	NA
chr6	89664910	89664940	15145[gene=ENSMUSG00000000811][PH=3][PH0=0.01][P=1.1e-03]	3	+	1	ENSMUSG00000000811	Txnrd3	intron	protein_coding	KNOWN	NA	NA
chr1	161780750	161780780	35551[gene=ENSMUSG00000000817][PH=8][PH0=0.07][P=6.3e-11]	8	-	4	ENSMUSG00000000817	Fasl	3'UTR	protein_coding	KNOWN	NA	NA
chr2	181515861	181515891	40549[gene=ENSMUSG00000000827][PH=6][PH0=0.08][P=1.7e-06]	6	+	3	ENSMUSG00000000827	Tpd52l2	3'UTR	protein_coding	KNOWN	NA	NA
chr11	53612478	53612508	14529[gene=ENSMUSG00000000869][PH=3][PH0=0.01][P=6.8e-05]	3	-	2	ENSMUSG00000000869	Il4	3'UTR|intron	protein_coding	KNOWN	NA	NA
chr14	54368578	54368608	12134[gene=ENSMUSG00000000959][PH=7][PH0=0.02][P=3.2e-12]	7	+	5	ENSMUSG00000000959	Oxa1l	3'UTR	protein_coding	KNOWN	NA	NA
chr11	83647995	83648025	23353[gene=ENSMUSG00000000982][PH=12][PH0=0.09][P=1.0e-100]	12	-	4	ENSMUSG00000000982	Ccl3	3'UTR	protein_coding	KNOWN	NA	NA
chr11	83648063	83648093	23369[gene=ENSMUSG00000000982][PH=6][PH0=0.09][P=1.1e-06]	6	-	4	ENSMUSG00000000982	Ccl3	3'UTR	protein_coding	KNOWN	NA	NA
chr11	83647912	83647942	23340[gene=ENSMUSG00000000982][PH=4][PH0=0.09][P=2.8e-03]	4	-	2	ENSMUSG00000000982	Ccl3	3'UTR	protein_coding	KNOWN	NA	NA
chr3	90488071	90488101	17935[gene=ENSMUSG00000001016][PH=3][PH0=0.02][P=1.9e-03]	3	+	1	ENSMUSG00000001016	Ilf2	3'UTR	protein_coding	KNOWN	NA	NA
chr3	90506919	90506949	8730[gene=ENSMUSG00000001017][PH=7][PH0=0.11][P=1.0e-07]	7	-	3	ENSMUSG00000001017	Chtop	5'UTR|downstream 10K|intron	protein_coding	KNOWN	NA	NA
chr3	90488382	90488412	8627[gene=ENSMUSG00000001018][PH=4][PH0=0.05][P=3.2e-04]	4	-	2	ENSMUSG00000001018	Snapin	3'UTR	protein_coding	KNOWN	NA	NA
chr3	90605010	90605040	17946[gene=ENSMUSG00000001021][PH=3][PH0=0.02][P=5.6e-04]	3	+	2	ENSMUSG00000001020	S100a4	5'UTR|CDS|downstream 10K	protein_coding	KNOWN	NA	NA
chr3	129983193	129983223	17655[gene=ENSMUSG00000001052][PH=5][PH0=0.04][P=9.0e-06]	5	-	4	ENSMUSG00000001052	Sec24b	3'UTR	protein_coding	KNOWN	NA	NA
chr5	114364535	114364565	17093[gene=ENSMUSG00000001098][PH=4][PH0=0.04][P=3.1e-04]	4	-	3	ENSMUSG00000001098	Kctd10	3'UTR	protein_coding	KNOWN	NA	NA
chr5	114365280	114365310	17110[gene=ENSMUSG00000001098][PH=12][PH0=0.04][P=1.0e-100]	12	-	5	ENSMUSG00000001098	Kctd10	3'UTR	protein_coding	KNOWN	NA	NA
chr10	76470025	76470055	15576[gene=ENSMUSG00000009114][PH=2][PH0=0.00][P=6.8e-03]	2	+	2	ENSMUSG00000001150	Mcm3ap	5'UTR|downstream 10K	protein_coding	KNOWN	NA	NA
chr6	86649824	86649854	13259[gene=ENSMUSG00000001156][PH=23][PH0=0.10][P=9.4e-14]	23	-	4	ENSMUSG00000001156	Mxd1	3'UTR	protein_coding	KNOWN	NA	NA
chr6	86649980	86650010	13298[gene=ENSMUSG00000001156][PH=5][PH0=0.10][P=3.0e-04]	5	-	5	ENSMUSG00000001156	Mxd1	3'UTR	protein_coding	KNOWN	NA	NA
chr6	86692747	86692777	13367[gene=ENSMUSG00000001157][PH=3][PH0=0.02][P=3.6e-03]	3	-	3	ENSMUSG00000001157	Gmcl1	3'UTR	protein_coding	KNOWN	NA	NA
chr6	86675378	86675408	13341[gene=ENSMUSG00000001158][PH=6][PH0=0.03][P=2.6e-09]	6	-	3	ENSMUSG00000001158	Snrnp27	3'UTR	protein_coding	KNOWN	NA	NA
chr12	100207112	100207142	18089[gene=ENSMUSG00000001175][PH=8][PH0=0.21][P=3.3e-07]	8	+	3	ENSMUSG00000001175	Calm1	3'UTR	protein_coding	KNOWN	NA	NA
chr12	100207276	100207306	18112[gene=ENSMUSG00000001175][PH=21][PH0=0.21][P=1.0e-100]	21	+	5	ENSMUSG00000001175	Calm1	3'UTR	protein_coding	KNOWN	NA	NA
chr12	100206468	100206498	18041[gene=ENSMUSG00000001175][PH=5][PH0=0.21][P=7.3e-03]	5	+	3	ENSMUSG00000001175	Calm1	3'UTR	protein_coding	KNOWN	NA	NA
chr12	100207822	100207852	18133[gene=ENSMUSG00000001175][PH=11][PH0=0.21][P=4.4e-12]	11	+	4	ENSMUSG00000001175	Calm1	3'UTR	protein_coding	KNOWN	NA	NA
chr10	78273538	78273568	14900[gene=ENSMUSG00000001211][PH=3][PH0=0.01][P=3.2e-03]	3	-	2	ENSMUSG00000001211	Agpat3	3'UTR	protein_coding	KNOWN	NA	NA
chr17	56187043	56187073	16530[gene=ENSMUSG00000001229][PH=4][PH0=0.02][P=9.8e-06]	4	-	4	ENSMUSG00000001229	Dpp9	3'UTR	protein_coding	KNOWN	NA	NA
chr7	31130146	31130176	4144[gene=ENSMUSG00000001248][PH=29][PH0=0.12][P=9.1e-14]	29	-	5	ENSMUSG00000001248	Gramd1a	3'UTR	protein_coding	KNOWN	NA	NA
chr15	102432877	102432907	18353[gene=ENSMUSG00000001280][PH=10][PH0=0.14][P=8.9e-12]	10	+	5	ENSMUSG00000001280	Sp1	3'UTR	protein_coding	KNOWN	NA	NA
chr15	102434114	102434144	18408[gene=ENSMUSG00000001280][PH=6][PH0=0.14][P=6.3e-05]	6	+	2	ENSMUSG00000001280	Sp1	3'UTR	protein_coding	KNOWN	NA	NA
chr15	102431864	102431894	18290[gene=ENSMUSG00000001280][PH=6][PH0=0.14][P=6.3e-05]	6	+	4	ENSMUSG00000001280	Sp1	3'UTR	protein_coding	KNOWN	NA	NA
chr15	102434751	102434781	18430[gene=ENSMUSG00000001280][PH=6][PH0=0.14][P=6.3e-05]	6	+	4	ENSMUSG00000001280	Sp1	3'UTR	protein_coding	KNOWN	NA	NA
chr15	102432783	102432813	18324[gene=ENSMUSG00000001280][PH=21][PH0=0.14][P=2.4e-13]	21	+	3	ENSMUSG00000001280	Sp1	3'UTR	protein_coding	KNOWN	NA	NA
chr15	102431619	102431649	18274[gene=ENSMUSG00000001280][PH=6][PH0=0.14][P=6.3e-05]	6	+	4	ENSMUSG00000001280	Sp1	3'UTR	protein_coding	KNOWN	NA	NA
chr9	22099698	22099728	6445[gene=ENSMUSG00000001349][PH=5][PH0=0.01][P=1.5e-09]	5	+	4	ENSMUSG00000001349	Cnn1	intron	protein_coding	KNOWN	NA	NA
chr9	78081880	78081910	17235[gene=ENSMUSG00000001366][PH=12][PH0=0.04][P=1.0e-100]	12	-	3	ENSMUSG00000001366	Fbxo9	3'UTR	protein_coding	KNOWN	NA	NA
chr9	78081773	78081803	17213[gene=ENSMUSG00000001366][PH=11][PH0=0.04][P=1.0e-100]	11	-	4	ENSMUSG00000001366	Fbxo9	3'UTR	protein_coding	KNOWN	NA	NA
chr6	3603015	3603045	308[gene=ENSMUSG00000001376][PH=5][PH0=0.03][P=1.4e-06]	5	+	2	ENSMUSG00000001376	Ccdc132	3'UTR	protein_coding	KNOWN	NA	NA
chr18	36766689	36766719	4912[gene=ENSMUSG00000001380][PH=12][PH0=0.05][P=1.0e-100]	12	-	3	ENSMUSG00000001380	Hars	3'UTR	protein_coding	KNOWN	NA	NA
chr18	36766652	36766682	4901[gene=ENSMUSG00000001380][PH=5][PH0=0.05][P=1.1e-05]	5	-	3	ENSMUSG00000001380	Hars	3'UTR	protein_coding	KNOWN	NA	NA
chr3	88169894	88169924	15978[gene=ENSMUSG00000001419][PH=15][PH0=0.20][P=1.0e-100]	15	+	4	ENSMUSG00000001419	Mef2d	3'UTR	protein_coding	KNOWN	NA	NA
chr3	88168947	88168977	15925[gene=ENSMUSG00000001419][PH=9][PH0=0.20][P=1.0e-08]	9	+	5	ENSMUSG00000001419	Mef2d	3'UTR	protein_coding	KNOWN	NA	NA
chr3	88168818	88168848	15898[gene=ENSMUSG00000001419][PH=50][PH0=0.20][P=1.0e-100]	50	+	5	ENSMUSG00000001419	Mef2d	3'UTR	protein_coding	KNOWN	NA	NA
chr3	88171572	88171602	16018[gene=ENSMUSG00000001419][PH=24][PH0=0.20][P=1.0e-100]	24	+	4	ENSMUSG00000001419	Mef2d	3'UTR	protein_coding	KNOWN	NA	NA
chr3	88169867	88169897	15969[gene=ENSMUSG00000001419][PH=6][PH0=0.20][P=4.4e-04]	6	+	4	ENSMUSG00000001419	Mef2d	3'UTR	protein_coding	KNOWN	NA	NA
chr6	28888575	28888605	3572[gene=ENSMUSG00000001424][PH=6][PH0=0.05][P=1.0e-06]	6	+	5	ENSMUSG00000001424	Snd1	3'UTR|intron	protein_coding	KNOWN	NA	NA
chr11	97161539	97161569	29012[gene=ENSMUSG00000001440][PH=5][PH0=0.09][P=2.0e-04]	5	-	3	ENSMUSG00000001440	Kpnb1	3'UTR	protein_coding	KNOWN	NA	NA
chr11	97173138	97173168	29092[gene=ENSMUSG00000001440][PH=5][PH0=0.09][P=2.0e-04]	5	-	4	ENSMUSG00000001440	Kpnb1	CDS	protein_coding	KNOWN	NA	NA
chr11	97162399	97162429	29033[gene=ENSMUSG00000001440][PH=8][PH0=0.09][P=6.5e-10]	8	-	3	ENSMUSG00000001440	Kpnb1	3'UTR	protein_coding	KNOWN	NA	NA
chr11	97235062	97235092	29207[gene=ENSMUSG00000001441][PH=4][PH0=0.03][P=2.7e-04]	4	-	4	ENSMUSG00000001441	Npepps	3'UTR|CDS	protein_coding	KNOWN	NA	NA
chr11	97098073	97098103	28940[gene=ENSMUSG00000001444][PH=5][PH0=0.03][P=9.5e-07]	5	-	2	ENSMUSG00000001444	Tbx21	3'UTR	protein_coding	KNOWN	NA	NA
chr11	97098755	97098785	28957[gene=ENSMUSG00000001444][PH=10][PH0=0.03][P=1.0e-100]	10	-	3	ENSMUSG00000001444	Tbx21	3'UTR|CDS	protein_coding	KNOWN	NA	NA
chr6	128321164	128321194	25924[gene=ENSMUSG00000001521][PH=5][PH0=0.01][P=3.5e-10]	5	-	4	ENSMUSG00000001521	Tulp3	3'UTR	protein_coding	KNOWN	NA	NA
chr17	35834470	35834500	9396[gene=ENSMUSG00000001525][PH=5][PH0=0.24][P=9.7e-03]	5	-	3	ENSMUSG00000001525	Tubb5	3'UTR	protein_coding	KNOWN	NA	NA
chr17	35834520	35834550	9420[gene=ENSMUSG00000001525][PH=45][PH0=0.24][P=4.2e-14]	45	-	5	ENSMUSG00000001525	Tubb5	3'UTR	protein_coding	KNOWN	NA	NA
chr17	35833942	35833972	9370[gene=ENSMUSG00000001525][PH=6][PH0=0.24][P=4.7e-04]	6	-	3	ENSMUSG00000001525	Tubb5	3'UTR	protein_coding	KNOWN	NA	NA
chr17	35834430	35834460	9388[gene=ENSMUSG00000001525][PH=5][PH0=0.24][P=9.7e-03]	5	-	2	ENSMUSG00000001525	Tubb5	3'UTR	protein_coding	KNOWN	NA	NA
chr5	29451353	29451383	3095[gene=ENSMUSG00000001569][PH=8][PH0=0.04][P=2.3e-12]	8	+	4	ENSMUSG00000001569	Nom1	3'UTR	protein_coding	KNOWN	NA	NA
chr12	40203160	40203190	2867[gene=ENSMUSG00000001627][PH=27][PH0=0.11][P=1.7e-13]	27	-	5	ENSMUSG00000001627	Ifrd1	3'UTR	protein_coding	KNOWN	NA	NA
chr12	40203395	40203425	2940[gene=ENSMUSG00000001627][PH=5][PH0=0.11][P=7.7e-04]	5	-	3	ENSMUSG00000001627	Ifrd1	CDS|downstream 10K	protein_coding	KNOWN	NA	NA
chr6	113324810	113324840	17879[gene=ENSMUSG00000001632][PH=9][PH0=0.04][P=1.0e-100]	9	+	5	ENSMUSG00000001632	Brpf1	3'UTR	protein_coding	KNOWN	NA	NA
chr5	148505191	148505221	28005[gene=ENSMUSG00000001687][PH=7][PH0=0.08][P=2.9e-08]	7	-	3	ENSMUSG00000001687	Ubl3	3'UTR	protein_coding	KNOWN	NA	NA
chr5	148505010	148505040	27977[gene=ENSMUSG00000001687][PH=10][PH0=0.08][P=1.0e-100]	10	-	4	ENSMUSG00000001687	Ubl3	3'UTR	protein_coding	KNOWN	NA	NA
chr5	148504646	148504676	27946[gene=ENSMUSG00000001687][PH=8][PH0=0.08][P=3.1e-10]	8	-	3	ENSMUSG00000001687	Ubl3	3'UTR	protein_coding	KNOWN	NA	NA
chr5	148552087	148552117	28126[gene=ENSMUSG00000001687][PH=9][PH0=0.08][P=3.1e-12]	9	-	4	ENSMUSG00000001687	Ubl3	5'UTR|intron	protein_coding	KNOWN	NA	NA
chr18	56503599	56503629	14095[gene=ENSMUSG00000001700][PH=18][PH0=0.08][P=2.4e-13]	18	+	5	ENSMUSG00000001700	Gramd3	3'UTR	protein_coding	KNOWN	NA	NA
chr13	38646032	38646062	5475[gene=ENSMUSG00000001707][PH=12][PH0=0.51][P=2.6e-09]	12	-	5	ENSMUSG00000001707	Eef1e1	3'UTR	protein_coding	KNOWN	NA	NA
chr13	38646054	38646084	5481[gene=ENSMUSG00000001707][PH=7][PH0=0.51][P=4.2e-03]	7	-	3	ENSMUSG00000001707	Eef1e1	3'UTR	protein_coding	KNOWN	NA	NA
chr13	38645969	38645999	5454[gene=ENSMUSG00000001707][PH=24][PH0=0.51][P=1.0e-100]	24	-	5	ENSMUSG00000001707	Eef1e1	3'UTR	protein_coding	KNOWN	NA	NA
chr13	38645767	38645797	5393[gene=ENSMUSG00000001707][PH=129][PH0=0.51][P=1.0e-100]	129	-	5	ENSMUSG00000001707	Eef1e1	3'UTR	protein_coding	KNOWN	NA	NA
chr12	112654443	112654473	18224[gene=ENSMUSG00000001729][PH=14][PH0=0.04][P=1.8e-13]	14	-	5	ENSMUSG00000001729	Akt1	3'UTR	protein_coding	KNOWN	NA	NA
chr7	83654817	83654847	11581[gene=ENSMUSG00000001741][PH=3][PH0=0.01][P=3.0e-03]	3	-	2	ENSMUSG00000001741	Il16	downstream 10K|intron	protein_coding	KNOWN	NA	NA
chr2	145918379	145918409	30001[gene=ENSMUSG00000001767][PH=4][PH0=0.03][P=1.6e-04]	4	-	3	ENSMUSG00000001767	Crnkl1	3'UTR	protein_coding	KNOWN	NA	NA
chr9	18313310	18313340	4941[gene=ENSMUSG00000001774][PH=6][PH0=0.18][P=1.9e-04]	6	+	3	ENSMUSG00000001774	Chordc1	3'UTR	protein_coding	KNOWN	NA	NA
chr9	18313443	18313473	4959[gene=ENSMUSG00000001774][PH=6][PH0=0.18][P=1.9e-04]	6	+	5	ENSMUSG00000001774	Chordc1	3'UTR	protein_coding	KNOWN	NA	NA
chr9	18313508	18313538	4968[gene=ENSMUSG00000001774][PH=5][PH0=0.18][P=5.3e-03]	5	+	2	ENSMUSG00000001774	Chordc1	3'UTR	protein_coding	KNOWN	NA	NA
chr9	18313178	18313208	4903[gene=ENSMUSG00000001774][PH=31][PH0=0.18][P=9.3e-14]	31	+	5	ENSMUSG00000001774	Chordc1	3'UTR	protein_coding	KNOWN	NA	NA
chr9	18313091	18313121	4880[gene=ENSMUSG00000001774][PH=5][PH0=0.18][P=5.3e-03]	5	+	3	ENSMUSG00000001774	Chordc1	3'UTR	protein_coding	KNOWN	NA	NA
chr9	25307921	25307951	7369[gene=ENSMUSG00000001833][PH=26][PH0=0.34][P=1.0e-100]	26	+	4	ENSMUSG00000001833	2017-09-07	3'UTR	protein_coding	KNOWN	NA	NA
chr9	25308314	25308344	7510[gene=ENSMUSG00000001833][PH=13][PH0=0.34][P=1.9e-12]	13	+	5	ENSMUSG00000001833	2017-09-07	3'UTR	protein_coding	KNOWN	NA	NA
chr9	25308531	25308561	7545[gene=ENSMUSG00000001833][PH=30][PH0=0.34][P=1.0e-100]	30	+	5	ENSMUSG00000001833	2017-09-07	3'UTR	protein_coding	KNOWN	NA	NA
chr9	25296418	25296448	7139[gene=ENSMUSG00000001833][PH=16][PH0=0.34][P=1.0e-100]	16	+	5	ENSMUSG00000001833	2017-09-07	CDS	protein_coding	KNOWN	NA	NA
chr9	25307669	25307699	7293[gene=ENSMUSG00000001833][PH=7][PH0=0.34][P=7.9e-04]	7	+	4	ENSMUSG00000001833	2017-09-07	3'UTR	protein_coding	KNOWN	NA	NA
chr9	25308266	25308296	7500[gene=ENSMUSG00000001833][PH=7][PH0=0.34][P=7.9e-04]	7	+	3	ENSMUSG00000001833	2017-09-07	3'UTR	protein_coding	KNOWN	NA	NA
chr9	25307799	25307829	7313[gene=ENSMUSG00000001833][PH=41][PH0=0.34][P=1.0e-100]	41	+	5	ENSMUSG00000001833	2017-09-07	3'UTR	protein_coding	KNOWN	NA	NA
chr9	25308047	25308077	7414[gene=ENSMUSG00000001833][PH=12][PH0=0.34][P=6.2e-11]	12	+	5	ENSMUSG00000001833	2017-09-07	3'UTR	protein_coding	KNOWN	NA	NA
chr9	25308161	25308191	7450[gene=ENSMUSG00000001833][PH=27][PH0=0.34][P=1.0e-100]	27	+	5	ENSMUSG00000001833	2017-09-07	3'UTR	protein_coding	KNOWN	NA	NA
chr5	143505764	143505794	25800[gene=ENSMUSG00000001847][PH=14][PH0=0.06][P=9.6e-14]	14	-	5	ENSMUSG00000001847	Rac1	3'UTR	protein_coding	KNOWN	NA	NA
chr5	143505983	143506013	25817[gene=ENSMUSG00000001847][PH=4][PH0=0.06][P=1.6e-03]	4	-	2	ENSMUSG00000001847	Rac1	3'UTR	protein_coding	KNOWN	NA	NA
chr5	143506703	143506733	25825[gene=ENSMUSG00000001847][PH=4][PH0=0.06][P=1.6e-03]	4	-	2	ENSMUSG00000001847	Rac1	3'UTR	protein_coding	KNOWN	NA	NA
chr17	75045843	75045873	18565[gene=ENSMUSG00000001870][PH=4][PH0=0.00][P=3.4e-10]	4	+	2	ENSMUSG00000001870	Ltbp1	intron	protein_coding	KNOWN	NA	NA
chr11	21350342	21350372	4112[gene=ENSMUSG00000001891][PH=3][PH0=0.02][P=5.2e-03]	3	-	1	ENSMUSG00000001891	Ugp2	intron	protein_coding	KNOWN	NA	NA
chr8	84683615	84683645	9346[gene=ENSMUSG00000001910][PH=4][PH0=0.05][P=5.5e-04]	4	-	3	ENSMUSG00000001910	Nacc1	intron	protein_coding	KNOWN	NA	NA
chr8	84707077	84707107	9376[gene=ENSMUSG00000001911][PH=15][PH0=0.02][P=6.5e-13]	15	-	5	ENSMUSG00000001911	Nfix	3'UTR|intron	protein_coding	KNOWN	NA	NA
chrX	41678306	41678336	3089[gene=ENSMUSG00000001986][PH=2][PH0=0.00][P=8.3e-03]	2	+	2	ENSMUSG00000001986	Gria3	3'UTR	protein_coding	KNOWN	NA	NA
chr8	125418542	125418572	16902[gene=ENSMUSG00000001995][PH=6][PH0=0.01][P=2.2e-11]	6	-	3	ENSMUSG00000001995	Sipa1l2	3'UTR	protein_coding	KNOWN	NA	NA
chr2	127066917	127066947	27551[gene=ENSMUSG00000001998][PH=5][PH0=0.03][P=1.4e-06]	5	+	3	ENSMUSG00000001998	Ap4e1	3'UTR	protein_coding	KNOWN	NA	NA
chrX	73686232	73686262	5007[gene=ENSMUSG00000002015][PH=7][PH0=0.04][P=3.5e-10]	7	-	3	ENSMUSG00000002015	Bcap31	3'UTR	protein_coding	KNOWN	NA	NA
chrX	73686386	73686416	5023[gene=ENSMUSG00000002015][PH=7][PH0=0.04][P=3.5e-10]	7	-	3	ENSMUSG00000002015	Bcap31	3'UTR	protein_coding	KNOWN	NA	NA
chr9	44804189	44804219	7379[gene=ENSMUSG00000002028][PH=8][PH0=0.09][P=2.4e-09]	8	-	4	ENSMUSG00000002028	Kmt2a	3'UTR	protein_coding	KNOWN	NA	NA
chr9	44820896	44820926	7541[gene=ENSMUSG00000002028][PH=5][PH0=0.09][P=6.2e-04]	5	-	4	ENSMUSG00000002028	Kmt2a	CDS|downstream 10K	protein_coding	KNOWN	NA	NA
chr9	44806510	44806540	7463[gene=ENSMUSG00000002028][PH=12][PH0=0.09][P=5.2e-13]	12	-	3	ENSMUSG00000002028	Kmt2a	3'UTR	protein_coding	KNOWN	NA	NA
chr9	44820865	44820895	7535[gene=ENSMUSG00000002028][PH=5][PH0=0.09][P=6.2e-04]	5	-	4	ENSMUSG00000002028	Kmt2a	CDS|downstream 10K	protein_coding	KNOWN	NA	NA
chr9	44805473	44805503	7411[gene=ENSMUSG00000002028][PH=5][PH0=0.09][P=6.2e-04]	5	-	4	ENSMUSG00000002028	Kmt2a	3'UTR	protein_coding	KNOWN	NA	NA
chr9	44803495	44803525	7356[gene=ENSMUSG00000002028][PH=7][PH0=0.09][P=1.8e-07]	7	-	4	ENSMUSG00000002028	Kmt2a	3'UTR	protein_coding	KNOWN	NA	NA
chr9	44969749	44969779	7851[gene=ENSMUSG00000002033][PH=5][PH0=0.06][P=1.9e-05]	5	-	4	ENSMUSG00000002033	Cd3g	3'UTR	protein_coding	KNOWN	NA	NA
chr9	44974261	44974291	7881[gene=ENSMUSG00000002033][PH=6][PH0=0.06][P=2.3e-07]	6	-	4	ENSMUSG00000002033	Cd3g	CDS	protein_coding	KNOWN	NA	NA
chr11	78225114	78225144	21510[gene=ENSMUSG00000002052][PH=4][PH0=0.06][P=3.1e-03]	4	-	2	ENSMUSG00000002052	Supt6	intron	protein_coding	KNOWN	NA	NA
chr11	78207187	78207217	21460[gene=ENSMUSG00000002052][PH=20][PH0=0.06][P=1.0e-100]	20	-	5	ENSMUSG00000002052	Supt6	3'UTR	protein_coding	KNOWN	NA	NA
chr7	16318081	16318111	954[gene=ENSMUSG00000002083][PH=3][PH0=0.02][P=3.4e-03]	3	+	2	ENSMUSG00000002083	Bbc3	3'UTR	protein_coding	KNOWN	NA	NA
chr2	6542639	6542669	1074[gene=ENSMUSG00000002107][PH=3][PH0=0.01][P=3.0e-03]	3	-	1	ENSMUSG00000002107	Celf2	3'UTR	protein_coding	KNOWN	NA	NA
chr2	6544476	6544506	1105[gene=ENSMUSG00000002107][PH=4][PH0=0.01][P=6.2e-06]	4	-	3	ENSMUSG00000002107	Celf2	3'UTR	protein_coding	KNOWN	NA	NA
chr2	6545087	6545117	1125[gene=ENSMUSG00000002107][PH=4][PH0=0.01][P=6.2e-06]	4	-	3	ENSMUSG00000002107	Celf2	3'UTR	protein_coding	KNOWN	NA	NA
chr2	6544006	6544036	1090[gene=ENSMUSG00000002107][PH=3][PH0=0.01][P=3.0e-03]	3	-	2	ENSMUSG00000002107	Celf2	3'UTR	protein_coding	KNOWN	NA	NA
chr10	127660934	127660964	26920[gene=ENSMUSG00000002147][PH=13][PH0=0.09][P=8.2e-14]	13	+	3	ENSMUSG00000002147	Stat6	3'UTR	protein_coding	KNOWN	NA	NA
chr6	71391100	71391130	9943[gene=ENSMUSG00000002222][PH=10][PH0=0.07][P=1.8e-13]	10	-	4	ENSMUSG00000002222	Rmnd5a	3'UTR	protein_coding	KNOWN	NA	NA
chr6	71390346	71390376	9924[gene=ENSMUSG00000002222][PH=4][PH0=0.07][P=4.7e-03]	4	-	3	ENSMUSG00000002222	Rmnd5a	3'UTR	protein_coding	KNOWN	NA	NA
chr6	71392705	71392735	9981[gene=ENSMUSG00000002222][PH=5][PH0=0.07][P=7.8e-05]	5	-	2	ENSMUSG00000002222	Rmnd5a	3'UTR|intron	protein_coding	KNOWN	NA	NA
chr6	71388751	71388781	9897[gene=ENSMUSG00000002222][PH=5][PH0=0.07][P=7.8e-05]	5	-	3	ENSMUSG00000002222	Rmnd5a	3'UTR	protein_coding	KNOWN	NA	NA
chr6	71388868	71388898	9905[gene=ENSMUSG00000002222][PH=4][PH0=0.07][P=4.7e-03]	4	-	1	ENSMUSG00000002222	Rmnd5a	3'UTR	protein_coding	KNOWN	NA	NA
chr6	71392600	71392630	9970[gene=ENSMUSG00000002222][PH=4][PH0=0.07][P=4.7e-03]	4	-	3	ENSMUSG00000002222	Rmnd5a	3'UTR|intron	protein_coding	KNOWN	NA	NA
chr3	104812021	104812051	12120[gene=ENSMUSG00000002227][PH=5][PH0=0.02][P=2.0e-07]	5	-	2	ENSMUSG00000002227	Mov10	intron	protein_coding	KNOWN	NA	NA
chr14	55609393	55609423	12360[gene=ENSMUSG00000047098][PH=4][PH0=0.04][P=3.6e-04]	4	+	4	ENSMUSG00000002325	Irf9	3'UTR	protein_coding	KNOWN	NA	NA
chr8	70182786	70182816	7243[gene=ENSMUSG00000002342][PH=5][PH0=0.02][P=6.4e-08]	5	+	3	ENSMUSG00000002342	Tmem161a	3'UTR	protein_coding	KNOWN	NA	NA
chr8	70173382	70173412	7234[gene=ENSMUSG00000079033][PH=2][PH0=0.00][P=6.1e-03]	2	+	2	ENSMUSG00000002342	Tmem161a	downstream 10K|intron	protein_coding	KNOWN	NA	NA
chr17	5911122	5911152	1128[gene=ENSMUSG00000002365][PH=4][PH0=0.01][P=4.1e-06]	4	+	1	ENSMUSG00000002365	Snx9	intron	protein_coding	KNOWN	NA	NA
chr17	56686835	56686865	15824[gene=ENSMUSG00000002372][PH=4][PH0=0.02][P=6.2e-05]	4	+	2	ENSMUSG00000002372	Ranbp3	intron	protein_coding	KNOWN	NA	NA
chr7	28187160	28187190	2809[gene=ENSMUSG00000002409][PH=3][PH0=0.02][P=2.9e-03]	3	+	3	ENSMUSG00000002409	Dyrk1b	3'UTR	protein_coding	KNOWN	NA	NA
chr6	39603307	39603337	6101[gene=ENSMUSG00000002413][PH=5][PH0=0.05][P=3.3e-05]	5	-	3	ENSMUSG00000002413	Braf	3'UTR	protein_coding	KNOWN	NA	NA
chr6	39604860	39604890	6137[gene=ENSMUSG00000002413][PH=6][PH0=0.05][P=3.1e-07]	6	-	2	ENSMUSG00000002413	Braf	3'UTR	protein_coding	KNOWN	NA	NA
chr6	39606830	39606860	6165[gene=ENSMUSG00000002413][PH=9][PH0=0.05][P=1.0e-100]	9	-	4	ENSMUSG00000002413	Braf	3'UTR	protein_coding	KNOWN	NA	NA
chr6	39603414	39603444	6108[gene=ENSMUSG00000002413][PH=4][PH0=0.05][P=2.8e-03]	4	-	3	ENSMUSG00000002413	Braf	3'UTR	protein_coding	KNOWN	NA	NA
chr6	39613400	39613430	6230[gene=ENSMUSG00000002413][PH=7][PH0=0.05][P=2.5e-09]	7	-	3	ENSMUSG00000002413	Braf	intron	protein_coding	KNOWN	NA	NA
chr6	39611653	39611683	6219[gene=ENSMUSG00000002413][PH=4][PH0=0.05][P=2.8e-03]	4	-	3	ENSMUSG00000002413	Braf	intron	protein_coding	KNOWN	NA	NA
chr6	39607633	39607663	6178[gene=ENSMUSG00000002413][PH=5][PH0=0.05][P=3.3e-05]	5	-	1	ENSMUSG00000002413	Braf	3'UTR	protein_coding	KNOWN	NA	NA
chr2	181616044	181616074	40804[gene=ENSMUSG00000002455][PH=3][PH0=0.02][P=8.7e-03]	3	+	3	ENSMUSG00000002455	Prpf6	CDS	protein_coding	KNOWN	NA	NA
chr2	181688811	181688841	36908[gene=ENSMUSG00000002458][PH=9][PH0=0.08][P=1.2e-12]	9	-	4	ENSMUSG00000002458	Rgs19	3'UTR|intron	protein_coding	KNOWN	NA	NA
chr16	89788829	89788859	14512[gene=ENSMUSG00000002489][PH=4][PH0=0.00][P=3.0e-07]	4	-	3	ENSMUSG00000002489	Tiam1	3'UTR|intron	protein_coding	KNOWN	NA	NA
chr2	32307810	32307840	9033[gene=ENSMUSG00000002546][PH=4][PH0=0.02][P=1.2e-05]	4	+	3	ENSMUSG00000002546	Golga2	3'UTR	protein_coding	KNOWN	NA	NA
chr10	128630905	128630935	24277[gene=ENSMUSG00000002578][PH=5][PH0=0.06][P=1.4e-05]	5	-	3	ENSMUSG00000002578	Ikzf4	3'UTR	protein_coding	KNOWN	NA	NA
chr10	128633617	128633647	24307[gene=ENSMUSG00000002578][PH=4][PH0=0.06][P=9.8e-04]	4	-	4	ENSMUSG00000002578	Ikzf4	3'UTR|intron	protein_coding	KNOWN	NA	NA
chr11	98437726	98437756	29784[gene=ENSMUSG00000002580][PH=15][PH0=0.06][P=3.3e-14]	15	-	5	ENSMUSG00000002580	Mien1	3'UTR	protein_coding	KNOWN	NA	NA
chr7	25687617	25687647	2230[gene=ENSMUSG00000063439][PH=33][PH0=0.22][P=1.0e-100]	33	+	4	ENSMUSG00000002603	Tgfb1	5'UTR|downstream 10K	protein_coding	KNOWN	NA	NA
chr7	25692416	25692446	2318[gene=ENSMUSG00000063439][PH=14][PH0=0.22][P=1.0e-100]	14	+	4	ENSMUSG00000002603	Tgfb1	3'UTR|CDS	protein_coding	KNOWN	NA	NA
chr7	25687737	25687767	2264[gene=ENSMUSG00000063439][PH=9][PH0=0.22][P=8.9e-09]	9	+	4	ENSMUSG00000002603	Tgfb1	5'UTR|downstream 10K	protein_coding	KNOWN	NA	NA
chr7	25705027	25705057	2430[gene=ENSMUSG00000002603][PH=64][PH0=0.29][P=1.0e-100]	64	+	5	ENSMUSG00000002603	Tgfb1	3'UTR	protein_coding	KNOWN	NA	NA
chr7	34184647	34184677	4388[gene=ENSMUSG00000002635][PH=6][PH0=0.03][P=1.3e-09]	6	-	3	ENSMUSG00000002635	Pdcd2l	3'UTR	protein_coding	KNOWN	NA	NA
chr11	34091018	34091048	9669[gene=ENSMUSG00000002699][PH=27][PH0=0.34][P=1.0e-100]	27	+	5	ENSMUSG00000002699	Lcp2	3'UTR	protein_coding	KNOWN	NA	NA
chr11	34090865	34090895	9575[gene=ENSMUSG00000002699][PH=88][PH0=0.34][P=1.0e-100]	88	+	5	ENSMUSG00000002699	Lcp2	3'UTR	protein_coding	KNOWN	NA	NA
chr11	34090590	34090620	9532[gene=ENSMUSG00000002699][PH=9][PH0=0.34][P=1.4e-06]	9	+	4	ENSMUSG00000002699	Lcp2	CDS|downstream 10K	protein_coding	KNOWN	NA	NA
chr2	166922746	166922776	38456[gene=ENSMUSG00000002718][PH=7][PH0=0.07][P=1.5e-08]	7	+	4	ENSMUSG00000002718	Cse1l	CDS|intron	protein_coding	KNOWN	NA	NA
chr2	166915224	166915254	38408[gene=ENSMUSG00000002718][PH=6][PH0=0.07][P=1.3e-06]	6	+	2	ENSMUSG00000002718	Cse1l	CDS|intron	protein_coding	KNOWN	NA	NA
chr2	166919616	166919646	38423[gene=ENSMUSG00000002718][PH=4][PH0=0.07][P=5.0e-03]	4	+	3	ENSMUSG00000002718	Cse1l	CDS|intron	protein_coding	KNOWN	NA	NA
chr2	76696228	76696258	18521[gene=ENSMUSG00000002733][PH=9][PH0=0.07][P=1.1e-12]	9	+	4	ENSMUSG00000002733	Plekha3	3'UTR	protein_coding	KNOWN	NA	NA
chr2	76696322	76696352	18533[gene=ENSMUSG00000002733][PH=4][PH0=0.07][P=3.6e-03]	4	+	4	ENSMUSG00000002733	Plekha3	3'UTR	protein_coding	KNOWN	NA	NA
chr2	76696489	76696519	18547[gene=ENSMUSG00000002733][PH=21][PH0=0.07][P=1.0e-100]	21	+	4	ENSMUSG00000002733	Plekha3	3'UTR	protein_coding	KNOWN	NA	NA
chr5	135217344	135217374	23260[gene=ENSMUSG00000002748][PH=5][PH0=0.06][P=3.7e-05]	5	+	3	ENSMUSG00000002748	Baz1b	CDS	protein_coding	KNOWN	NA	NA
chr5	135230207	135230237	23299[gene=ENSMUSG00000002748][PH=8][PH0=0.06][P=3.0e-11]	8	+	2	ENSMUSG00000002748	Baz1b	CDS	protein_coding	KNOWN	NA	NA
chr17	46712810	46712840	13606[gene=ENSMUSG00000097560][PH=3][PH0=0.00][P=5.0e-05]	3	+	2	ENSMUSG00000002763	Pex6	intron	protein_coding	KNOWN	NA	NA
chr9	21273475	21273505	5528[gene=ENSMUSG00000002820][PH=8][PH0=0.03][P=2.8e-13]	8	+	4	ENSMUSG00000002820	Atg4d	3'UTR	protein_coding	KNOWN	NA	NA
chr9	21418605	21418635	5857[gene=ENSMUSG00000002825][PH=3][PH0=0.03][P=6.8e-03]	3	+	2	ENSMUSG00000002825	Qtrt1	intron	protein_coding	KNOWN	NA	NA
chr16	38591253	38591283	10172[gene=ENSMUSG00000002845][PH=7][PH0=0.05][P=1.1e-09]	7	+	4	ENSMUSG00000002845	Tmem39a	3'UTR|intron	protein_coding	KNOWN	NA	NA
chr16	38518394	38518424	7460[gene=ENSMUSG00000002846][PH=7][PH0=0.03][P=8.0e-12]	7	-	4	ENSMUSG00000002846	Timmdc1	CDS|downstream 10K	protein_coding	KNOWN	NA	NA
chr6	88883475	88883505	14648[gene=ENSMUSG00000002870][PH=5][PH0=0.03][P=2.8e-07]	5	-	2	ENSMUSG00000002870	Mcm2	3'UTR	protein_coding	KNOWN	NA	NA
chr1	52457874	52457904	9518[gene=ENSMUSG00000002881][PH=4][PH0=0.05][P=1.6e-03]	4	-	2	ENSMUSG00000002881	Nab1	3'UTR	protein_coding	KNOWN	NA	NA
chr1	52458878	52458908	9534[gene=ENSMUSG00000002881][PH=4][PH0=0.05][P=1.6e-03]	4	-	3	ENSMUSG00000002881	Nab1	3'UTR	protein_coding	KNOWN	NA	NA
chr6	120482905	120482935	19386[gene=ENSMUSG00000002897][PH=16][PH0=0.09][P=1.0e-100]	16	+	5	ENSMUSG00000002897	Il17ra	3'UTR	protein_coding	KNOWN	NA	NA
chr8	4246141	4246171	322[gene=ENSMUSG00000046589][PH=10][PH0=0.04][P=6.1e-14]	10	+	3	ENSMUSG00000002948	Map2k7	3'UTR|intron	protein_coding	KNOWN	NA	NA
chr8	4259752	4259782	255[gene=ENSMUSG00000002949][PH=4][PH0=0.03][P=1.1e-04]	4	-	3	ENSMUSG00000002949	Timm44	3'UTR	protein_coding	KNOWN	NA	NA
chr7	19664450	19664480	1873[gene=ENSMUSG00000002992][PH=3][PH0=0.01][P=6.1e-04]	3	-	2	ENSMUSG00000002981	Clptm1	downstream 10K|intron	protein_coding	KNOWN	NA	NA
chr7	19624332	19624362	1800[gene=ENSMUSG00000002983][PH=4][PH0=0.08][P=6.6e-03]	4	-	2	ENSMUSG00000002983	Relb	downstream 10K|intron	protein_coding	KNOWN	NA	NA
chr7	19701349	19701379	1890[gene=ENSMUSG00000002984][PH=8][PH0=0.05][P=2.2e-12]	8	-	3	ENSMUSG00000002984	Tomm40	3'UTR	protein_coding	KNOWN	NA	NA
chr12	31926454	31926484	2184[gene=ENSMUSG00000002996][PH=3][PH0=0.02][P=4.0e-03]	3	-	3	ENSMUSG00000002996	Hbp1	3'UTR	protein_coding	KNOWN	NA	NA
chr6	134925299	134925329	22013[gene=ENSMUSG00000003031][PH=68][PH0=0.39][P=8.9e-14]	68	+	5	ENSMUSG00000003031	Cdkn1b	3'UTR	protein_coding	KNOWN	NA	NA
chr6	134925129	134925159	21965[gene=ENSMUSG00000003031][PH=8][PH0=0.39][P=3.0e-05]	8	+	4	ENSMUSG00000003031	Cdkn1b	3'UTR	protein_coding	KNOWN	NA	NA
chr6	134925386	134925416	22056[gene=ENSMUSG00000003031][PH=6][PH0=0.39][P=7.9e-03]	6	+	3	ENSMUSG00000003031	Cdkn1b	3'UTR	protein_coding	KNOWN	NA	NA
chr13	19357853	19357883	2469[gene=ENSMUSG00000003062][PH=3][PH0=0.01][P=1.8e-03]	3	-	3	ENSMUSG00000003062	Stard3nl	3'UTR	protein_coding	KNOWN	NA	NA
chr13	19358004	19358034	2475[gene=ENSMUSG00000003062][PH=3][PH0=0.01][P=1.8e-03]	3	-	2	ENSMUSG00000003062	Stard3nl	3'UTR	protein_coding	KNOWN	NA	NA
chr10	80116410	80116440	16401[gene=ENSMUSG00000003068][PH=3][PH0=0.03][P=8.8e-03]	3	+	3	ENSMUSG00000003068	Stk11	5'UTR	protein_coding	KNOWN	NA	NA
chr7	17004962	17004992	1268[gene=ENSMUSG00000003099][PH=10][PH0=0.05][P=1.0e-100]	10	-	4	ENSMUSG00000003099	Ppp5c	3'UTR	protein_coding	KNOWN	NA	NA
chr7	17004657	17004687	1247[gene=ENSMUSG00000003099][PH=5][PH0=0.05][P=1.3e-05]	5	-	3	ENSMUSG00000003099	Ppp5c	3'UTR	protein_coding	KNOWN	NA	NA
chr11	98251440	98251470	32020[gene=ENSMUSG00000003119][PH=4][PH0=0.06][P=5.2e-03]	4	+	2	ENSMUSG00000003119	Cdk12	3'UTR|intron	protein_coding	KNOWN	NA	NA
chr11	98253275	98253305	32074[gene=ENSMUSG00000003119][PH=4][PH0=0.06][P=5.2e-03]	4	+	2	ENSMUSG00000003119	Cdk12	downstream 10K|intron	protein_coding	KNOWN	NA	NA
chr11	98250834	98250864	32000[gene=ENSMUSG00000003119][PH=10][PH0=0.06][P=1.0e-100]	10	+	4	ENSMUSG00000003119	Cdk12	3'UTR|intron	protein_coding	KNOWN	NA	NA
chr11	98252626	98252656	32051[gene=ENSMUSG00000003119][PH=6][PH0=0.06][P=1.0e-06]	6	+	3	ENSMUSG00000003119	Cdk12	downstream 10K|intron	protein_coding	KNOWN	NA	NA
chr9	45967706	45967736	8297[gene=ENSMUSG00000003131][PH=6][PH0=0.11][P=8.2e-06]	6	-	4	ENSMUSG00000003131	Pafah1b2	3'UTR	protein_coding	KNOWN	NA	NA
chr9	45968218	45968248	8325[gene=ENSMUSG00000003131][PH=14][PH0=0.11][P=1.0e-100]	14	-	5	ENSMUSG00000003131	Pafah1b2	3'UTR	protein_coding	KNOWN	NA	NA
chr9	45965520	45965550	8256[gene=ENSMUSG00000003131][PH=16][PH0=0.11][P=1.0e-100]	16	-	5	ENSMUSG00000003131	Pafah1b2	3'UTR	protein_coding	KNOWN	NA	NA
chr1	39545314	39545344	2877[gene=ENSMUSG00000003135][PH=3][PH0=0.01][P=3.2e-04]	3	+	2	ENSMUSG00000003135	Cnot11	3'UTR	protein_coding	NOVEL	NA	NA
chr6	122729403	122729433	23819[gene=ENSMUSG00000003153][PH=13][PH0=0.01][P=4.9e-13]	13	-	5	ENSMUSG00000003153	Slc2a3	3'UTR	protein_coding	KNOWN	NA	NA
chr6	122843067	122843097	19720[gene=ENSMUSG00000003154][PH=8][PH0=0.03][P=1.0e-13]	8	+	3	ENSMUSG00000003154	Foxj2	3'UTR	protein_coding	KNOWN	NA	NA
chr6	122844485	122844515	19746[gene=ENSMUSG00000003154][PH=4][PH0=0.03][P=1.4e-04]	4	+	4	ENSMUSG00000003154	Foxj2	3'UTR	protein_coding	KNOWN	NA	NA
chr5	8068179	8068209	847[gene=ENSMUSG00000003161][PH=3][PH0=0.02][P=5.0e-03]	3	+	2	ENSMUSG00000003161	Sri	3'UTR	protein_coding	KNOWN	NA	NA
chr5	8067735	8067765	837[gene=ENSMUSG00000003161][PH=3][PH0=0.02][P=5.0e-03]	3	+	2	ENSMUSG00000003161	Sri	3'UTR	protein_coding	KNOWN	NA	NA
chr10	58493988	58494018	12754[gene=ENSMUSG00000003226][PH=11][PH0=0.15][P=1.0e-100]	11	+	4	ENSMUSG00000003226	Ranbp2	3'UTR	protein_coding	KNOWN	NA	NA
chr10	58475256	58475286	12582[gene=ENSMUSG00000003226][PH=5][PH0=0.15][P=3.6e-03]	5	+	3	ENSMUSG00000003226	Ranbp2	CDS	protein_coding	KNOWN	NA	NA
chr10	58476210	58476240	12591[gene=ENSMUSG00000003226][PH=8][PH0=0.15][P=5.5e-08]	8	+	3	ENSMUSG00000003226	Ranbp2	CDS	protein_coding	KNOWN	NA	NA
chr10	58494117	58494147	12782[gene=ENSMUSG00000003226][PH=9][PH0=0.15][P=1.0e-09]	9	+	4	ENSMUSG00000003226	Ranbp2	3'UTR	protein_coding	KNOWN	NA	NA
chr10	58460534	58460564	12500[gene=ENSMUSG00000003226][PH=6][PH0=0.15][P=1.1e-04]	6	+	5	ENSMUSG00000003226	Ranbp2	CDS	protein_coding	KNOWN	NA	NA
chr16	20531605	20531635	3602[gene=ENSMUSG00000003233][PH=3][PH0=0.02][P=4.3e-03]	3	+	1	ENSMUSG00000003233	Dvl3	3'UTR|intron	protein_coding	KNOWN	NA	NA
chr7	45807588	45807618	6814[gene=ENSMUSG00000003269][PH=11][PH0=0.05][P=5.3e-14]	11	-	5	ENSMUSG00000003269	Cyth2	3'UTR	protein_coding	KNOWN	NA	NA
chr7	45734008	45734038	6786[gene=ENSMUSG00000003271][PH=3][PH0=0.01][P=3.3e-04]	3	-	3	ENSMUSG00000003271	Sult2b1	CDS	protein_coding	KNOWN	NA	NA
chr17	70003177	70003207	16510[gene=ENSMUSG00000003279][PH=2][PH0=0.00][P=1.1e-03]	2	+	1	ENSMUSG00000003279	Dlgap1	intron	protein_coding	KNOWN	NA	NA
chr8	111156388	111156418	13282[gene=ENSMUSG00000003316][PH=8][PH0=0.03][P=6.8e-13]	8	-	5	ENSMUSG00000003316	Glg1	3'UTR	protein_coding	KNOWN	NA	NA
chr10	80640258	80640288	16765[gene=ENSMUSG00000003345][PH=9][PH0=0.04][P=1.0e-100]	9	+	4	ENSMUSG00000003345	Csnk1g2	3'UTR	protein_coding	KNOWN	NA	NA
chr15	98645219	98645249	21661[gene=ENSMUSG00000003360][PH=4][PH0=0.03][P=6.5e-05]	4	-	4	ENSMUSG00000003360	Ddx23	3'UTR	protein_coding	KNOWN	NA	NA
chr3	87539671	87539701	15275[gene=ENSMUSG00000003382][PH=8][PH0=0.12][P=5.6e-09]	8	+	4	ENSMUSG00000003382	Etv3	3'UTR	protein_coding	KNOWN	NA	NA
chr3	87540103	87540133	15328[gene=ENSMUSG00000003382][PH=5][PH0=0.12][P=6.4e-04]	5	+	3	ENSMUSG00000003382	Etv3	3'UTR	protein_coding	KNOWN	NA	NA
chr3	87539833	87539863	15302[gene=ENSMUSG00000003382][PH=9][PH0=0.12][P=8.5e-11]	9	+	5	ENSMUSG00000003382	Etv3	3'UTR	protein_coding	KNOWN	NA	NA
chr2	13652820	13652850	2667[gene=ENSMUSG00000003418][PH=10][PH0=0.04][P=1.0e-100]	10	-	5	ENSMUSG00000003418	St8sia6	3'UTR	protein_coding	KNOWN	NA	NA
chr2	13654720	13654750	2698[gene=ENSMUSG00000003418][PH=4][PH0=0.04][P=1.9e-03]	4	-	4	ENSMUSG00000003418	St8sia6	3'UTR	protein_coding	KNOWN	NA	NA
chr7	45123031	45123061	6021[gene=ENSMUSG00000003429][PH=350][PH0=1.13][P=7.1e-14]	350	-	5	ENSMUSG00000003429	Rps11	downstream 10K|intron	protein_coding	KNOWN	NA	NA
chr1	172066023	172066053	39102[gene=ENSMUSG00000003458][PH=6][PH0=0.03][P=2.9e-09]	6	-	4	ENSMUSG00000003458	Ncstn	3'UTR	protein_coding	KNOWN	NA	NA
chr1	172134999	172135029	29816[gene=ENSMUSG00000003464][PH=3][PH0=0.03][P=8.6e-03]	3	+	2	ENSMUSG00000003464	Pex19	3'UTR	protein_coding	KNOWN	NA	NA
chr17	35822541	35822571	10170[gene=ENSMUSG00000003541][PH=7][PH0=0.09][P=1.9e-08]	7	+	4	ENSMUSG00000003541	Ier3	3'UTR	protein_coding	KNOWN	NA	NA
chr17	35822501	35822531	10161[gene=ENSMUSG00000003541][PH=6][PH0=0.09][P=1.2e-06]	6	+	2	ENSMUSG00000003541	Ier3	3'UTR	protein_coding	KNOWN	NA	NA
chr17	35822604	35822634	10181[gene=ENSMUSG00000003541][PH=7][PH0=0.09][P=1.9e-08]	7	+	4	ENSMUSG00000003541	Ier3	3'UTR	protein_coding	KNOWN	NA	NA
chr7	19303411	19303441	1530[gene=ENSMUSG00000003545][PH=4][PH0=0.04][P=1.7e-04]	4	-	3	ENSMUSG00000003545	Fosb	3'UTR	protein_coding	KNOWN	NA	NA
chr2	112500916	112500946	23976[gene=ENSMUSG00000080622][PH=3][PH0=0.02][P=1.5e-03]	3	+	2	ENSMUSG00000003604	Aven	intron	protein_coding	KNOWN	NA	NA
chr4	133847829	133847859	20401[gene=ENSMUSG00000003644][PH=7][PH0=0.02][P=5.0e-12]	7	-	4	ENSMUSG00000003644	Rps6ka1	3'UTR	protein_coding	KNOWN	NA	NA
chr2	127231696	127231726	27617[gene=ENSMUSG00000003660][PH=4][PH0=0.02][P=1.5e-05]	4	+	3	ENSMUSG00000003660	Snrnp200	CDS	protein_coding	KNOWN	NA	NA
chr2	127242554	127242584	27412[gene=ENSMUSG00000003662][PH=4][PH0=0.02][P=2.6e-05]	4	-	3	ENSMUSG00000003662	Ciao1	3'UTR	protein_coding	KNOWN	NA	NA
chr2	127242636	127242666	27419[gene=ENSMUSG00000003662][PH=3][PH0=0.02][P=3.2e-03]	3	-	2	ENSMUSG00000003662	Ciao1	3'UTR	protein_coding	KNOWN	NA	NA
chr1	121304453	121304483	23165[gene=ENSMUSG00000003721][PH=4][PH0=0.02][P=2.5e-05]	4	-	2	ENSMUSG00000003721	Insig2	3'UTR	protein_coding	KNOWN	NA	NA
chr4	129644047	129644077	17981[gene=ENSMUSG00000003731][PH=9][PH0=0.04][P=1.0e-100]	9	-	4	ENSMUSG00000003731	Kpna6	3'UTR	protein_coding	KNOWN	NA	NA
chr10	53906234	53906264	9388[gene=ENSMUSG00000003746][PH=6][PH0=0.08][P=6.6e-06]	6	-	3	ENSMUSG00000003746	Man1a	3'UTR	protein_coding	KNOWN	NA	NA
chr10	53905440	53905470	9339[gene=ENSMUSG00000003746][PH=6][PH0=0.08][P=6.6e-06]	6	-	5	ENSMUSG00000003746	Man1a	3'UTR	protein_coding	KNOWN	NA	NA
chr10	53906078	53906108	9369[gene=ENSMUSG00000003746][PH=5][PH0=0.08][P=4.4e-04]	5	-	3	ENSMUSG00000003746	Man1a	3'UTR	protein_coding	KNOWN	NA	NA
chr10	53906999	53907029	9419[gene=ENSMUSG00000003746][PH=20][PH0=0.08][P=1.0e-100]	20	-	5	ENSMUSG00000003746	Man1a	3'UTR	protein_coding	KNOWN	NA	NA
chr7	27207225	27207255	2546[gene=ENSMUSG00000003752][PH=7][PH0=0.02][P=5.2e-12]	7	-	5	ENSMUSG00000003752	Itpkc	3'UTR	protein_coding	KNOWN	NA	NA
chr18	34599841	34599871	3801[gene=ENSMUSG00000003778][PH=6][PH0=0.03][P=4.9e-09]	6	-	3	ENSMUSG00000003778	Brd8	3'UTR	protein_coding	KNOWN	NA	NA
chr8	107375136	107375166	19584[gene=ENSMUSG00000003847][PH=5][PH0=0.11][P=1.5e-03]	5	+	2	ENSMUSG00000003847	Nfat5	3'UTR|intron	protein_coding	KNOWN	NA	NA
chr8	107373583	107373613	19562[gene=ENSMUSG00000003847][PH=5][PH0=0.11][P=1.5e-03]	5	+	3	ENSMUSG00000003847	Nfat5	3'UTR|intron	protein_coding	KNOWN	NA	NA
chr8	107373564	107373594	19559[gene=ENSMUSG00000003847][PH=5][PH0=0.11][P=1.5e-03]	5	+	4	ENSMUSG00000003847	Nfat5	3'UTR|intron	protein_coding	KNOWN	NA	NA
chr8	107373507	107373537	19537[gene=ENSMUSG00000003847][PH=35][PH0=0.11][P=1.0e-100]	35	+	4	ENSMUSG00000003847	Nfat5	3'UTR|intron	protein_coding	KNOWN	NA	NA
chr8	107376787	107376817	19628[gene=ENSMUSG00000003847][PH=6][PH0=0.11][P=3.2e-05]	6	+	4	ENSMUSG00000003847	Nfat5	3'UTR|intron	protein_coding	KNOWN	NA	NA
chr8	107375157	107375187	19588[gene=ENSMUSG00000003847][PH=5][PH0=0.11][P=1.5e-03]	5	+	2	ENSMUSG00000003847	Nfat5	3'UTR|intron	protein_coding	KNOWN	NA	NA
chr8	107377746	107377776	19651[gene=ENSMUSG00000003847][PH=5][PH0=0.11][P=1.5e-03]	5	+	3	ENSMUSG00000003847	Nfat5	3'UTR|intron	protein_coding	KNOWN	NA	NA
chr8	107412491	107412521	12547[gene=ENSMUSG00000003848][PH=9][PH0=0.05][P=1.0e-100]	9	-	3	ENSMUSG00000003848	Nob1	3'UTR	protein_coding	KNOWN	NA	NA
chr7	45421894	45421924	6573[gene=ENSMUSG00000003868][PH=9][PH0=0.02][P=1.0e-100]	9	-	3	ENSMUSG00000003868	Ruvbl2	3'UTR	protein_coding	KNOWN	NA	NA
chr7	45461728	45461758	6617[gene=ENSMUSG00000003873][PH=9][PH0=0.12][P=5.1e-11]	9	-	4	ENSMUSG00000003873	Bax	3'UTR	protein_coding	KNOWN	NA	NA
chr7	45461792	45461822	6640[gene=ENSMUSG00000003873][PH=22][PH0=0.12][P=1.0e-100]	22	-	5	ENSMUSG00000003873	Bax	3'UTR	protein_coding	KNOWN	NA	NA
chr15	9512908	9512938	1242[gene=ENSMUSG00000003882][PH=7][PH0=0.12][P=4.9e-07]	7	-	4	ENSMUSG00000003882	Il7r	CDS	protein_coding	KNOWN	NA	NA
chr15	9506334	9506364	1164[gene=ENSMUSG00000003882][PH=6][PH0=0.12][P=2.4e-05]	6	-	4	ENSMUSG00000003882	Il7r	3'UTR	protein_coding	KNOWN	NA	NA
chr17	33333138	33333168	7306[gene=ENSMUSG00000003929][PH=4][PH0=0.04][P=3.9e-04]	4	-	2	ENSMUSG00000003929	Zfp81	3'UTR	protein_coding	KNOWN	NA	NA
chr11	90278465	90278495	28911[gene=ENSMUSG00000003948][PH=4][PH0=0.03][P=5.7e-04]	4	+	3	ENSMUSG00000003948	Mmd	3'UTR	protein_coding	KNOWN	NA	NA
chr11	90278073	90278103	28887[gene=ENSMUSG00000003948][PH=7][PH0=0.03][P=1.9e-10]	7	+	3	ENSMUSG00000003948	Mmd	3'UTR	protein_coding	KNOWN	NA	NA
chr11	90276999	90277029	28838[gene=ENSMUSG00000003948][PH=11][PH0=0.03][P=1.0e-100]	11	+	5	ENSMUSG00000003948	Mmd	3'UTR	protein_coding	KNOWN	NA	NA
chr11	90278308	90278338	28902[gene=ENSMUSG00000003948][PH=4][PH0=0.03][P=5.7e-04]	4	+	3	ENSMUSG00000003948	Mmd	3'UTR	protein_coding	KNOWN	NA	NA
chr11	90277872	90277902	28867[gene=ENSMUSG00000003948][PH=4][PH0=0.03][P=5.7e-04]	4	+	3	ENSMUSG00000003948	Mmd	3'UTR	protein_coding	KNOWN	NA	NA
chr11	90277892	90277922	28871[gene=ENSMUSG00000003948][PH=4][PH0=0.03][P=5.7e-04]	4	+	2	ENSMUSG00000003948	Mmd	3'UTR	protein_coding	KNOWN	NA	NA
chr15	76906254	76906284	10538[gene=ENSMUSG00000055041][PH=5][PH0=0.13][P=3.4e-04]	5	+	3	ENSMUSG00000003970	Rpl8	CDS|downstream 10K	protein_coding	KNOWN	NA	NA
chr15	76904585	76904615	10496[gene=ENSMUSG00000003970][PH=4][PH0=0.11][P=7.9e-03]	4	+	2	ENSMUSG00000003970	Rpl8	CDS|downstream 10K	protein_coding	KNOWN	NA	NA
chr15	76905891	76905921	10524[gene=ENSMUSG00000055041][PH=10][PH0=0.13][P=7.0e-13]	10	+	5	ENSMUSG00000003970	Rpl8	CDS|downstream 10K	protein_coding	KNOWN	NA	NA
chr11	100886817	100886847	31839[gene=ENSMUSG00000004040][PH=9][PH0=0.07][P=7.6e-13]	9	-	4	ENSMUSG00000004040	Stat3	3'UTR	protein_coding	KNOWN	NA	NA
chr11	100888195	100888225	31882[gene=ENSMUSG00000004040][PH=5][PH0=0.07][P=7.6e-05]	5	-	3	ENSMUSG00000004040	Stat3	3'UTR	protein_coding	KNOWN	NA	NA
chr11	100887183	100887213	31856[gene=ENSMUSG00000004040][PH=6][PH0=0.07][P=1.0e-06]	6	-	2	ENSMUSG00000004040	Stat3	3'UTR	protein_coding	KNOWN	NA	NA
chr11	100885092	100885122	32849[gene=ENSMUSG00000004043][PH=4][PH0=0.09][P=9.5e-03]	4	+	2	ENSMUSG00000004043	Stat5a	3'UTR	protein_coding	KNOWN	NA	NA
chr11	100884674	100884704	32812[gene=ENSMUSG00000004043][PH=4][PH0=0.09][P=9.5e-03]	4	+	2	ENSMUSG00000004043	Stat5a	3'UTR	protein_coding	KNOWN	NA	NA
chr11	100884789	100884819	32822[gene=ENSMUSG00000004043][PH=18][PH0=0.09][P=1.0e-100]	18	+	5	ENSMUSG00000004043	Stat5a	3'UTR	protein_coding	KNOWN	NA	NA
chr9	14510494	14510524	4215[gene=ENSMUSG00000004096][PH=3][PH0=0.03][P=4.7e-03]	3	+	2	ENSMUSG00000004096	Cwc15	3'UTR	protein_coding	KNOWN	NA	NA
chr9	20890803	20890833	5279[gene=ENSMUSG00000004100][PH=74][PH0=0.53][P=1.0e-100]	74	+	5	ENSMUSG00000004100	Ppan	intron	protein_coding	KNOWN	NA	NA
chr9	20889527	20889557	5238[gene=ENSMUSG00000004100][PH=102][PH0=0.53][P=1.0e-100]	102	+	5	ENSMUSG00000004100	Ppan	intron	protein_coding	KNOWN	NA	NA
chr1	154699072	154699102	33533[gene=ENSMUSG00000004110][PH=2][PH0=0.00][P=3.9e-03]	2	-	2	ENSMUSG00000004110	Cacna1e	intron	protein_coding	KNOWN	NA	NA
chr10	60278552	60278582	13121[gene=ENSMUSG00000004207][PH=5][PH0=0.03][P=5.3e-07]	5	+	2	ENSMUSG00000004207	Psap	intron	protein_coding	KNOWN	NA	NA
chr19	44836358	44836388	13370[gene=ENSMUSG00000004231][PH=11][PH0=0.01][P=2.7e-13]	11	+	1	ENSMUSG00000004231	Pax2	3'UTR	protein_coding	KNOWN	NA	NA
chr6	124742585	124742615	24083[gene=ENSMUSG00000004263][PH=39][PH0=0.29][P=1.0e-100]	39	-	5	ENSMUSG00000004263	Atn1	3'UTR|intron	protein_coding	KNOWN	NA	NA
chr6	124741223	124741253	24034[gene=ENSMUSG00000072772][PH=147][PH0=0.47][P=1.0e-100]	147	-	5	ENSMUSG00000004263	Atn1	5'UTR|downstream 10K|intron	protein_coding	KNOWN	NA	NA
chr6	124715368	124715398	19897[gene=ENSMUSG00000004264][PH=8][PH0=0.18][P=6.4e-08]	8	+	3	ENSMUSG00000004264	Phb2	intron	protein_coding	KNOWN	NA	NA
chr6	124715468	124715498	19932[gene=ENSMUSG00000004264][PH=38][PH0=0.18][P=1.0e-100]	38	+	4	ENSMUSG00000004264	Phb2	intron	protein_coding	KNOWN	NA	NA
chr6	124712731	124712761	19874[gene=ENSMUSG00000004270][PH=3][PH0=0.02][P=6.4e-03]	3	+	3	ENSMUSG00000004264	Phb2	CDS|downstream 10K	protein_coding	KNOWN	NA	NA
chr6	124720717	124720747	23956[gene=ENSMUSG00000004266][PH=7][PH0=0.06][P=4.5e-09]	7	-	5	ENSMUSG00000004266	Ptpn6	3'UTR	protein_coding	KNOWN	NA	NA
chr6	124720773	124720803	23974[gene=ENSMUSG00000004266][PH=15][PH0=0.06][P=8.2e-14]	15	-	4	ENSMUSG00000004266	Ptpn6	3'UTR	protein_coding	KNOWN	NA	NA
chrX	7159408	7159438	42[gene=ENSMUSG00000004317][PH=3][PH0=0.01][P=9.0e-04]	3	-	3	ENSMUSG00000004317	Clcn5	3'UTR	protein_coding	KNOWN	NA	NA
chr8	60910451	60910481	5634[gene=ENSMUSG00000004319][PH=12][PH0=0.05][P=1.0e-100]	12	-	4	ENSMUSG00000004319	Clcn3	3'UTR	protein_coding	KNOWN	NA	NA
chr8	60911876	60911906	5673[gene=ENSMUSG00000004319][PH=7][PH0=0.05][P=3.9e-09]	7	-	3	ENSMUSG00000004319	Clcn3	3'UTR	protein_coding	KNOWN	NA	NA
chr8	60911838	60911868	5666[gene=ENSMUSG00000004319][PH=4][PH0=0.05][P=2.9e-03]	4	-	3	ENSMUSG00000004319	Clcn3	3'UTR	protein_coding	KNOWN	NA	NA
chr1	80265781	80265811	16368[gene=ENSMUSG00000004364][PH=9][PH0=0.11][P=1.1e-10]	9	-	5	ENSMUSG00000004364	Cul3	3'UTR	protein_coding	KNOWN	NA	NA
chr1	80281431	80281461	16473[gene=ENSMUSG00000004364][PH=9][PH0=0.11][P=1.1e-10]	9	-	3	ENSMUSG00000004364	Cul3	CDS|downstream 10K	protein_coding	KNOWN	NA	NA
chr1	80282636	80282666	16510[gene=ENSMUSG00000004364][PH=18][PH0=0.11][P=1.0e-100]	18	-	4	ENSMUSG00000004364	Cul3	CDS|downstream 10K	protein_coding	KNOWN	NA	NA
chr1	80287043	80287073	16553[gene=ENSMUSG00000004364][PH=6][PH0=0.11][P=2.9e-05]	6	-	4	ENSMUSG00000004364	Cul3	3'UTR|CDS	protein_coding	KNOWN	NA	NA
chr6	52766639	52766669	9964[gene=ENSMUSG00000004535][PH=4][PH0=0.06][P=4.5e-03]	4	+	3	ENSMUSG00000004535	Tax1bp1	3'UTR	protein_coding	KNOWN	NA	NA
chr6	52741963	52741993	9863[gene=ENSMUSG00000004535][PH=4][PH0=0.06][P=4.5e-03]	4	+	2	ENSMUSG00000004535	Tax1bp1	CDS	protein_coding	KNOWN	NA	NA
chr6	52766357	52766387	9949[gene=ENSMUSG00000004535][PH=5][PH0=0.06][P=7.3e-05]	5	+	4	ENSMUSG00000004535	Tax1bp1	3'UTR	protein_coding	KNOWN	NA	NA
chr6	52766719	52766749	9979[gene=ENSMUSG00000004535][PH=13][PH0=0.06][P=1.9e-13]	13	+	4	ENSMUSG00000004535	Tax1bp1	3'UTR	protein_coding	KNOWN	NA	NA
chr3	142792615	142792645	21686[gene=ENSMUSG00000004591][PH=13][PH0=0.05][P=1.0e-100]	13	-	4	ENSMUSG00000004591	Pkn2	3'UTR	protein_coding	KNOWN	NA	NA
chr3	142792098	142792128	21662[gene=ENSMUSG00000004591][PH=6][PH0=0.05][P=4.9e-07]	6	-	4	ENSMUSG00000004591	Pkn2	3'UTR	protein_coding	KNOWN	NA	NA
chr3	142793225	142793255	21722[gene=ENSMUSG00000004591][PH=4][PH0=0.05][P=3.4e-03]	4	-	1	ENSMUSG00000004591	Pkn2	3'UTR	protein_coding	KNOWN	NA	NA
chr3	142793245	142793275	21724[gene=ENSMUSG00000004591][PH=4][PH0=0.05][P=3.4e-03]	4	-	2	ENSMUSG00000004591	Pkn2	3'UTR	protein_coding	KNOWN	NA	NA
chr10	79993255	79993285	16270[gene=ENSMUSG00000095615][PH=6][PH0=0.06][P=9.4e-08]	6	+	5	ENSMUSG00000004665	Cnn2	CDS|intron	protein_coding	KNOWN	NA	NA
chr8	71360270	71360300	7648[gene=ENSMUSG00000004677][PH=6][PH0=0.04][P=9.6e-08]	6	+	4	ENSMUSG00000004677	Myo9b	3'UTR	protein_coding	KNOWN	NA	NA
chr12	85134041	85134071	16965[gene=ENSMUSG00000004789][PH=9][PH0=0.04][P=1.0e-100]	9	+	4	ENSMUSG00000004789	Dlst	3'UTR	protein_coding	KNOWN	NA	NA
chr11	61664673	61664703	17792[gene=ENSMUSG00000004837][PH=7][PH0=0.15][P=1.3e-06]	7	+	2	ENSMUSG00000004837	Grap	intron	protein_coding	KNOWN	NA	NA
chr11	61672245	61672275	17892[gene=ENSMUSG00000004837][PH=7][PH0=0.15][P=1.3e-06]	7	+	3	ENSMUSG00000004837	Grap	3'UTR	protein_coding	KNOWN	NA	NA
chr16	65539481	65539511	12045[gene=ENSMUSG00000004843][PH=10][PH0=0.03][P=1.0e-100]	10	-	4	ENSMUSG00000004843	Chmp2b	3'UTR	protein_coding	KNOWN	NA	NA
chr1	181815886	181815916	43444[gene=ENSMUSG00000004880][PH=5][PH0=0.06][P=2.5e-05]	5	-	3	ENSMUSG00000004880	Lbr	3'UTR	protein_coding	KNOWN	NA	NA
chr1	181815727	181815757	43434[gene=ENSMUSG00000004880][PH=5][PH0=0.06][P=2.5e-05]	5	-	4	ENSMUSG00000004880	Lbr	3'UTR	protein_coding	KNOWN	NA	NA
chr1	181816683	181816713	43469[gene=ENSMUSG00000004880][PH=4][PH0=0.06][P=1.7e-03]	4	-	3	ENSMUSG00000004880	Lbr	3'UTR	protein_coding	KNOWN	NA	NA
chr3	87915344	87915374	15534[gene=ENSMUSG00000004897][PH=4][PH0=0.10][P=6.4e-03]	4	+	3	ENSMUSG00000004897	Hdgf	3'UTR	protein_coding	KNOWN	NA	NA
chr3	87915679	87915709	15543[gene=ENSMUSG00000004897][PH=4][PH0=0.10][P=6.4e-03]	4	+	2	ENSMUSG00000004897	Hdgf	3'UTR	protein_coding	KNOWN	NA	NA
chr10	81153293	81153323	15759[gene=ENSMUSG00000004934][PH=29][PH0=0.06][P=1.0e-100]	29	-	5	ENSMUSG00000004934	Pias4	3'UTR	protein_coding	KNOWN	NA	NA
chr9	64186024	64186054	12942[gene=ENSMUSG00000004936][PH=5][PH0=0.03][P=3.0e-06]	5	-	3	ENSMUSG00000004936	Map2k1	3'UTR	protein_coding	KNOWN	NA	NA
chr9	64185818	64185848	12931[gene=ENSMUSG00000004936][PH=5][PH0=0.03][P=3.0e-06]	5	-	3	ENSMUSG00000004936	Map2k1	3'UTR	protein_coding	KNOWN	NA	NA
chr9	64185797	64185827	12926[gene=ENSMUSG00000004936][PH=4][PH0=0.03][P=3.7e-04]	4	-	4	ENSMUSG00000004936	Map2k1	3'UTR	protein_coding	KNOWN	NA	NA
chr6	51463119	51463149	8455[gene=ENSMUSG00000004980][PH=12][PH0=0.53][P=3.4e-09]	12	-	5	ENSMUSG00000004980	Hnrnpa2b1	3'UTR|intron	protein_coding	KNOWN	NA	NA
chr6	51463042	51463072	8424[gene=ENSMUSG00000004980][PH=52][PH0=0.53][P=1.0e-100]	52	-	4	ENSMUSG00000004980	Hnrnpa2b1	3'UTR|intron	protein_coding	KNOWN	NA	NA
chr6	51462904	51462934	8382[gene=ENSMUSG00000004980][PH=9][PH0=0.53][P=2.2e-05]	9	-	3	ENSMUSG00000004980	Hnrnpa2b1	3'UTR|intron	protein_coding	KNOWN	NA	NA
chr8	84258342	84258372	9258[gene=ENSMUSG00000004994][PH=8][PH0=0.04][P=7.3e-13]	8	-	4	ENSMUSG00000004994	Ccdc130	3'UTR	protein_coding	KNOWN	NA	NA
chr3	146750496	146750526	22592[gene=ENSMUSG00000005034][PH=4][PH0=0.04][P=1.0e-03]	4	-	3	ENSMUSG00000005034	Prkacb	CDS	protein_coding	KNOWN	NA	NA
chr3	146731331	146731361	22550[gene=ENSMUSG00000005034][PH=4][PH0=0.04][P=1.0e-03]	4	-	4	ENSMUSG00000005034	Prkacb	3'UTR	protein_coding	KNOWN	NA	NA
chr3	146730275	146730305	22509[gene=ENSMUSG00000005034][PH=4][PH0=0.04][P=1.0e-03]	4	-	3	ENSMUSG00000005034	Prkacb	3'UTR	protein_coding	KNOWN	NA	NA
chr3	146732236	146732266	22570[gene=ENSMUSG00000005034][PH=4][PH0=0.04][P=1.0e-03]	4	-	3	ENSMUSG00000005034	Prkacb	3'UTR	protein_coding	KNOWN	NA	NA
chr3	146729589	146729619	22493[gene=ENSMUSG00000005034][PH=6][PH0=0.04][P=8.1e-08]	6	-	4	ENSMUSG00000005034	Prkacb	3'UTR	protein_coding	KNOWN	NA	NA
chr10	78427581	78427611	16080[gene=ENSMUSG00000005054][PH=5][PH0=0.02][P=6.8e-08]	5	+	3	ENSMUSG00000005054	Cstb	3'UTR	protein_coding	KNOWN	NA	NA
chr12	72101375	72101405	9965[gene=ENSMUSG00000005078][PH=3][PH0=0.02][P=2.3e-03]	3	+	1	ENSMUSG00000005078	Jkamp	3'UTR	protein_coding	KNOWN	NA	NA
chr12	72101413	72101443	9969[gene=ENSMUSG00000005078][PH=3][PH0=0.02][P=2.3e-03]	3	+	2	ENSMUSG00000005078	Jkamp	3'UTR	protein_coding	KNOWN	NA	NA
chr2	102811446	102811476	21500[gene=ENSMUSG00000005087][PH=25][PH0=0.06][P=1.0e-100]	25	-	4	ENSMUSG00000005087	Cd44	3'UTR	protein_coding	KNOWN	NA	NA
chr2	102813420	102813450	21560[gene=ENSMUSG00000005087][PH=9][PH0=0.06][P=5.9e-13]	9	-	3	ENSMUSG00000005087	Cd44	3'UTR	protein_coding	KNOWN	NA	NA
chr2	102813518	102813548	21571[gene=ENSMUSG00000005087][PH=5][PH0=0.06][P=6.7e-05]	5	-	4	ENSMUSG00000005087	Cd44	3'UTR	protein_coding	KNOWN	NA	NA
chr2	102811788	102811818	21530[gene=ENSMUSG00000005087][PH=4][PH0=0.06][P=4.6e-03]	4	-	2	ENSMUSG00000005087	Cd44	3'UTR	protein_coding	KNOWN	NA	NA
chr5	38527705	38527735	5404[gene=ENSMUSG00000005103][PH=4][PH0=0.08][P=5.9e-03]	4	-	3	ENSMUSG00000005103	Wdr1	3'UTR	protein_coding	KNOWN	NA	NA
chr5	38526950	38526980	5377[gene=ENSMUSG00000005103][PH=10][PH0=0.08][P=1.3e-13]	10	-	5	ENSMUSG00000005103	Wdr1	3'UTR	protein_coding	KNOWN	NA	NA
chr15	66929326	66929356	12313[gene=ENSMUSG00000005125][PH=16][PH0=0.06][P=1.5e-13]	16	-	5	ENSMUSG00000005125	Ndrg1	3'UTR	protein_coding	KNOWN	NA	NA
chr15	66930392	66930422	12355[gene=ENSMUSG00000005125][PH=6][PH0=0.06][P=5.2e-07]	6	-	4	ENSMUSG00000005125	Ndrg1	3'UTR	protein_coding	KNOWN	NA	NA
chr11	69734695	69734725	18598[gene=ENSMUSG00000005198][PH=5][PH0=0.10][P=3.1e-04]	5	-	4	ENSMUSG00000005198	Polr2a	CDS	protein_coding	KNOWN	NA	NA
chr2	69200700	69200730	16167[gene=ENSMUSG00000005233][PH=2][PH0=0.00][P=6.7e-03]	2	-	1	ENSMUSG00000005233	Spc25	intron	protein_coding	KNOWN	NA	NA
chr16	18834416	18834446	3156[gene=ENSMUSG00000005262][PH=5][PH0=0.05][P=9.3e-06]	5	+	4	ENSMUSG00000005262	Ufd1l	3'UTR	protein_coding	KNOWN	NA	NA
chr16	18835197	18835227	3176[gene=ENSMUSG00000005262][PH=4][PH0=0.05][P=7.7e-04]	4	+	3	ENSMUSG00000005262	Ufd1l	3'UTR	protein_coding	KNOWN	NA	NA
chr15	10311468	10311498	1577[gene=ENSMUSG00000005268][PH=2][PH0=0.00][P=7.4e-03]	2	+	2	ENSMUSG00000005268	Prlr	intron	protein_coding	KNOWN	NA	NA
chr5	33742327	33742357	4764[gene=ENSMUSG00000005299][PH=7][PH0=0.02][P=4.7e-13]	7	-	4	ENSMUSG00000005299	Letm1	3'UTR	protein_coding	KNOWN	NA	NA
chr13	58177614	58177644	10935[gene=ENSMUSG00000005312][PH=7][PH0=0.22][P=3.9e-05]	7	-	2	ENSMUSG00000005312	Ubqln1	3'UTR	protein_coding	KNOWN	NA	NA
chr13	58176461	58176491	10805[gene=ENSMUSG00000005312][PH=10][PH0=0.22][P=8.8e-10]	10	-	5	ENSMUSG00000005312	Ubqln1	3'UTR	protein_coding	KNOWN	NA	NA
chr13	58177517	58177547	10901[gene=ENSMUSG00000005312][PH=107][PH0=0.22][P=1.0e-100]	107	-	5	ENSMUSG00000005312	Ubqln1	3'UTR	protein_coding	KNOWN	NA	NA
chr13	58177800	58177830	10993[gene=ENSMUSG00000005312][PH=33][PH0=0.22][P=1.0e-100]	33	-	4	ENSMUSG00000005312	Ubqln1	3'UTR	protein_coding	KNOWN	NA	NA
chr1	173341147	173341177	39155[gene=ENSMUSG00000005338][PH=2][PH0=0.00][P=3.5e-03]	2	-	2	ENSMUSG00000005338	Cadm3	CDS	protein_coding	KNOWN	NA	NA
chr6	106778324	106778354	20416[gene=ENSMUSG00000005362][PH=4][PH0=0.04][P=4.9e-04]	4	-	3	ENSMUSG00000005362	Crbn	3'UTR	protein_coding	KNOWN	NA	NA
chr17	87990891	87990921	23395[gene=ENSMUSG00000005371][PH=7][PH0=0.21][P=4.0e-05]	7	-	4	ENSMUSG00000005371	Fbxo11	3'UTR	protein_coding	KNOWN	NA	NA
chr17	87990933	87990963	23410[gene=ENSMUSG00000005371][PH=11][PH0=0.21][P=1.5e-11]	11	-	5	ENSMUSG00000005371	Fbxo11	3'UTR	protein_coding	KNOWN	NA	NA
chr17	87991127	87991157	23436[gene=ENSMUSG00000005371][PH=6][PH0=0.21][P=1.2e-03]	6	-	3	ENSMUSG00000005371	Fbxo11	3'UTR	protein_coding	KNOWN	NA	NA
chr17	87991368	87991398	23465[gene=ENSMUSG00000005371][PH=11][PH0=0.21][P=1.5e-11]	11	-	5	ENSMUSG00000005371	Fbxo11	3'UTR	protein_coding	KNOWN	NA	NA
chr5	135054015	135054045	23115[gene=ENSMUSG00000005378][PH=22][PH0=0.07][P=1.0e-100]	22	-	5	ENSMUSG00000005378	Wbscr22	intron	protein_coding	KNOWN	NA	NA
chr8	83995904	83995934	14146[gene=ENSMUSG00000005469][PH=6][PH0=0.02][P=1.7e-10]	6	+	3	ENSMUSG00000005469	Prkaca	3'UTR	protein_coding	KNOWN	NA	NA
chr2	91013721	91013751	20749[gene=ENSMUSG00000005506][PH=7][PH0=0.13][P=1.4e-06]	7	+	5	ENSMUSG00000005506	Celf1	3'UTR|intron	protein_coding	KNOWN	NA	NA
chr2	91016801	91016831	20857[gene=ENSMUSG00000005506][PH=5][PH0=0.13][P=2.7e-03]	5	+	3	ENSMUSG00000005506	Celf1	3'UTR	protein_coding	KNOWN	NA	NA
chr2	91013677	91013707	20737[gene=ENSMUSG00000005506][PH=9][PH0=0.13][P=4.0e-10]	9	+	5	ENSMUSG00000005506	Celf1	3'UTR|intron	protein_coding	KNOWN	NA	NA
chr2	91015334	91015364	20809[gene=ENSMUSG00000005506][PH=27][PH0=0.13][P=1.0e-100]	27	+	5	ENSMUSG00000005506	Celf1	3'UTR|intron	protein_coding	KNOWN	NA	NA
chr7	68006025	68006055	7332[gene=ENSMUSG00000005533][PH=8][PH0=0.11][P=3.0e-08]	8	+	3	ENSMUSG00000005533	Igf1r	intron	protein_coding	KNOWN	NA	NA
chr7	68033549	68033579	7641[gene=ENSMUSG00000005533][PH=7][PH0=0.11][P=1.9e-06]	7	+	3	ENSMUSG00000005533	Igf1r	intron	protein_coding	KNOWN	NA	NA
chr7	67952844	67952874	7154[gene=ENSMUSG00000005533][PH=10][PH0=0.11][P=5.8e-12]	10	+	5	ENSMUSG00000005533	Igf1r	CDS	protein_coding	KNOWN	NA	NA
chr8	3153317	3153347	13[gene=ENSMUSG00000005534][PH=9][PH0=0.02][P=1.0e-100]	9	-	4	ENSMUSG00000005534	Insr	3'UTR	protein_coding	KNOWN	NA	NA
chr7	13035429	13035459	607[gene=ENSMUSG00000005575][PH=4][PH0=0.08][P=2.5e-03]	4	-	3	ENSMUSG00000005575	Ube2m	3'UTR	protein_coding	KNOWN	NA	NA
chr7	13035389	13035419	605[gene=ENSMUSG00000005575][PH=4][PH0=0.08][P=2.5e-03]	4	-	3	ENSMUSG00000005575	Ube2m	3'UTR	protein_coding	KNOWN	NA	NA
chr7	13035538	13035568	618[gene=ENSMUSG00000005575][PH=7][PH0=0.08][P=1.2e-08]	7	-	3	ENSMUSG00000005575	Ube2m	3'UTR	protein_coding	KNOWN	NA	NA
chr16	4320182	4320212	595[gene=ENSMUSG00000005580][PH=3][PH0=0.00][P=7.5e-06]	3	-	2	ENSMUSG00000005580	Adcy9	intron	protein_coding	KNOWN	NA	NA
chr7	111055832	111055862	17056[gene=ENSMUSG00000005609][PH=5][PH0=0.03][P=1.6e-06]	5	+	4	ENSMUSG00000005609	Ctr9	3'UTR	protein_coding	KNOWN	NA	NA
chr7	111043121	111043151	17034[gene=ENSMUSG00000005609][PH=12][PH0=0.03][P=1.1e-13]	12	+	3	ENSMUSG00000005609	Ctr9	CDS	protein_coding	KNOWN	NA	NA
chr7	111076065	111076095	16299[gene=ENSMUSG00000005610][PH=2347][PH0=4.27][P=1.5e-13]	2347	-	5	ENSMUSG00000005610	Eif4g2	intron	protein_coding	KNOWN	NA	NA
chr7	111081542	111081572	16551[gene=ENSMUSG00000005610][PH=66][PH0=4.27][P=1.5e-13]	66	-	5	ENSMUSG00000005610	Eif4g2	5'UTR	protein_coding	KNOWN	NA	NA
chr7	111074394	111074424	16196[gene=ENSMUSG00000005610][PH=39][PH0=4.27][P=1.5e-13]	39	-	5	ENSMUSG00000005610	Eif4g2	CDS	protein_coding	KNOWN	NA	NA
chr7	111072558	111072588	16079[gene=ENSMUSG00000005610][PH=42][PH0=4.27][P=1.5e-13]	42	-	5	ENSMUSG00000005610	Eif4g2	3'UTR	protein_coding	KNOWN	NA	NA
chr7	111076190	111076220	16389[gene=ENSMUSG00000005610][PH=42][PH0=4.27][P=1.5e-13]	42	-	4	ENSMUSG00000005610	Eif4g2	intron	protein_coding	KNOWN	NA	NA
chr7	81042073	81042103	11276[gene=ENSMUSG00000005621][PH=5][PH0=0.05][P=2.9e-05]	5	+	2	ENSMUSG00000005621	Zfp592	3'UTR	protein_coding	KNOWN	NA	NA
chr7	81037808	81037838	11241[gene=ENSMUSG00000005621][PH=22][PH0=0.05][P=1.0e-100]	22	+	4	ENSMUSG00000005621	Zfp592	CDS	protein_coding	KNOWN	NA	NA
chr6	83306036	83306066	11561[gene=ENSMUSG00000005667][PH=11][PH0=0.58][P=2.1e-07]	11	-	5	ENSMUSG00000005667	Mthfd2	3'UTR	protein_coding	KNOWN	NA	NA
chr6	83306534	83306564	11665[gene=ENSMUSG00000005667][PH=196][PH0=0.58][P=1.0e-100]	196	-	5	ENSMUSG00000005667	Mthfd2	3'UTR	protein_coding	KNOWN	NA	NA
chr5	75656582	75656612	11168[gene=ENSMUSG00000005672][PH=2][PH0=0.00][P=6.5e-03]	2	+	2	ENSMUSG00000005672	Kit	3'UTR	protein_coding	KNOWN	NA	NA
chr10	128361270	128361300	27590[gene=ENSMUSG00000005683][PH=7][PH0=0.06][P=2.0e-09]	7	+	4	ENSMUSG00000005683	Cs	3'UTR	protein_coding	KNOWN	NA	NA
chr10	128362192	128362222	27641[gene=ENSMUSG00000005683][PH=4][PH0=0.06][P=1.4e-03]	4	+	4	ENSMUSG00000005683	Cs	3'UTR	protein_coding	KNOWN	NA	NA
chr10	128361726	128361756	27616[gene=ENSMUSG00000005683][PH=13][PH0=0.06][P=1.0e-100]	13	+	5	ENSMUSG00000005683	Cs	3'UTR	protein_coding	KNOWN	NA	NA
chr3	103178767	103178797	20923[gene=ENSMUSG00000007379][PH=3][PH0=0.01][P=1.3e-03]	3	+	2	ENSMUSG00000005687	Bcas2	3'UTR	protein_coding	KNOWN	NA	NA
chrX	42521812	42521842	3932[gene=ENSMUSG00000005696][PH=8][PH0=0.04][P=5.5e-13]	8	+	3	ENSMUSG00000005696	Sh2d1a	3'UTR	protein_coding	KNOWN	NA	NA
chr8	105682834	105682864	18197[gene=ENSMUSG00000005698][PH=10][PH0=0.06][P=1.0e-100]	10	+	4	ENSMUSG00000005698	Ctcf	3'UTR	protein_coding	KNOWN	NA	NA
chr8	105682616	105682646	18177[gene=ENSMUSG00000005698][PH=12][PH0=0.06][P=1.0e-100]	12	+	4	ENSMUSG00000005698	Ctcf	3'UTR	protein_coding	KNOWN	NA	NA
chr8	105682254	105682284	18156[gene=ENSMUSG00000005698][PH=5][PH0=0.06][P=6.3e-05]	5	+	3	ENSMUSG00000005698	Ctcf	3'UTR	protein_coding	KNOWN	NA	NA
chr16	4544724	4544754	615[gene=ENSMUSG00000005718][PH=6][PH0=0.03][P=5.3e-09]	6	-	1	ENSMUSG00000005718	Tfap4	3'UTR	protein_coding	KNOWN	NA	NA
chr16	18240732	18240762	3556[gene=ENSMUSG00000005732][PH=4][PH0=0.07][P=2.0e-03]	4	-	2	ENSMUSG00000005732	Ranbp1	intron	protein_coding	KNOWN	NA	NA
chr16	18240769	18240799	3565[gene=ENSMUSG00000005732][PH=7][PH0=0.07][P=6.3e-09]	7	-	4	ENSMUSG00000005732	Ranbp1	intron	protein_coding	KNOWN	NA	NA
chr1	165861541	165861571	28368[gene=ENSMUSG00000005763][PH=8][PH0=0.22][P=2.2e-06]	8	+	5	ENSMUSG00000005763	Cd247	3'UTR|intron	protein_coding	KNOWN	NA	NA
chr1	165811595	165811625	27823[gene=ENSMUSG00000005763][PH=6][PH0=0.22][P=1.9e-03]	6	+	4	ENSMUSG00000005763	Cd247	intron	protein_coding	KNOWN	NA	NA
chr1	165862032	165862062	28421[gene=ENSMUSG00000005763][PH=58][PH0=0.22][P=1.0e-100]	58	+	5	ENSMUSG00000005763	Cd247	3'UTR|intron	protein_coding	KNOWN	NA	NA
chr2	122746782	122746812	27116[gene=ENSMUSG00000005804][PH=3][PH0=0.02][P=1.6e-03]	3	+	2	ENSMUSG00000005804	Bloc1s6	3'UTR	protein_coding	KNOWN	NA	NA
chr3	138458972	138459002	20841[gene=ENSMUSG00000005813][PH=10][PH0=0.08][P=1.2e-13]	10	-	4	ENSMUSG00000005813	Metap1	3'UTR	protein_coding	KNOWN	NA	NA
chr17	57190233	57190263	16885[gene=ENSMUSG00000005824][PH=3][PH0=0.02][P=1.6e-03]	3	-	3	ENSMUSG00000005824	Tnfsf14	3'UTR	protein_coding	KNOWN	NA	NA
chr16	11193262	11193292	1807[gene=ENSMUSG00000005846][PH=11][PH0=0.11][P=6.0e-14]	11	-	5	ENSMUSG00000005846	Rsl1d1	3'UTR	protein_coding	KNOWN	NA	NA
chr16	11202333	11202363	1870[gene=ENSMUSG00000005846][PH=6][PH0=0.11][P=8.2e-06]	6	-	4	ENSMUSG00000005846	Rsl1d1	CDS	protein_coding	KNOWN	NA	NA
chr16	11193231	11193261	1801[gene=ENSMUSG00000005846][PH=5][PH0=0.11][P=3.6e-04]	5	-	3	ENSMUSG00000005846	Rsl1d1	3'UTR	protein_coding	KNOWN	NA	NA
chr16	11192976	11193006	1783[gene=ENSMUSG00000005846][PH=5][PH0=0.11][P=3.6e-04]	5	-	4	ENSMUSG00000005846	Rsl1d1	3'UTR	protein_coding	KNOWN	NA	NA
chr16	11202395	11202425	1880[gene=ENSMUSG00000005846][PH=7][PH0=0.11][P=1.6e-07]	7	-	4	ENSMUSG00000005846	Rsl1d1	CDS	protein_coding	KNOWN	NA	NA
chr18	34318862	34318892	7773[gene=ENSMUSG00000005871][PH=5][PH0=0.04][P=2.0e-05]	5	+	3	ENSMUSG00000005871	Apc	3'UTR	protein_coding	KNOWN	NA	NA
chr2	155846917	155846947	32045[gene=ENSMUSG00000005882][PH=6][PH0=0.02][P=2.7e-10]	6	-	3	ENSMUSG00000005882	Uqcc1	3'UTR	protein_coding	KNOWN	NA	NA
chr1	13371664	13371694	1906[gene=ENSMUSG00000005886][PH=5][PH0=0.07][P=4.1e-04]	5	-	4	ENSMUSG00000005886	Ncoa2	intron	protein_coding	KNOWN	NA	NA
chr1	13140945	13140975	1110[gene=ENSMUSG00000005886][PH=18][PH0=0.07][P=7.2e-13]	18	-	5	ENSMUSG00000005886	Ncoa2	3'UTR	protein_coding	KNOWN	NA	NA
chr6	92169527	92169557	15608[gene=ENSMUSG00000005893][PH=4][PH0=0.04][P=1.0e-03]	4	+	3	ENSMUSG00000005893	Nr2c2	3'UTR	protein_coding	KNOWN	NA	NA
chr6	92122196	92122226	15508[gene=ENSMUSG00000005893][PH=5][PH0=0.04][P=1.0e-05]	5	+	3	ENSMUSG00000005893	Nr2c2	intron	protein_coding	KNOWN	NA	NA
chr16	17643874	17643904	2987[gene=ENSMUSG00000005899][PH=3][PH0=0.01][P=5.6e-04]	3	+	2	ENSMUSG00000005899	Smpd4	3'UTR	protein_coding	KNOWN	NA	NA
chr2	105387669	105387699	22852[gene=ENSMUSG00000005973][PH=4][PH0=0.03][P=1.1e-04]	4	-	4	ENSMUSG00000005973	Rcn1	3'UTR	protein_coding	KNOWN	NA	NA
chr2	105387708	105387738	22859[gene=ENSMUSG00000005973][PH=5][PH0=0.03][P=9.2e-07]	5	-	3	ENSMUSG00000005973	Rcn1	3'UTR	protein_coding	KNOWN	NA	NA
chr1	150449827	150449857	23038[gene=ENSMUSG00000006005][PH=13][PH0=0.09][P=2.0e-13]	13	+	5	ENSMUSG00000006005	Tpr	3'UTR	protein_coding	KNOWN	NA	NA
chr1	150410045	150410075	22858[gene=ENSMUSG00000006005][PH=8][PH0=0.09][P=1.8e-09]	8	+	2	ENSMUSG00000006005	Tpr	CDS	protein_coding	KNOWN	NA	NA
chr1	150449900	150449930	23055[gene=ENSMUSG00000006005][PH=5][PH0=0.09][P=4.6e-04]	5	+	3	ENSMUSG00000006005	Tpr	3'UTR	protein_coding	KNOWN	NA	NA
chr1	150386381	150386411	32408[gene=ENSMUSG00000006010][PH=3][PH0=0.02][P=2.3e-03]	3	-	1	ENSMUSG00000006010	BC003331	CDS	protein_coding	KNOWN	NA	NA
chr7	16116745	16116775	900[gene=ENSMUSG00000006024][PH=27][PH0=0.07][P=1.0e-100]	27	+	5	ENSMUSG00000006024	Napa	3'UTR	protein_coding	KNOWN	NA	NA
chr16	17485142	17485172	2930[gene=ENSMUSG00000006134][PH=4][PH0=0.04][P=3.7e-04]	4	+	2	ENSMUSG00000006134	Crkl	3'UTR	protein_coding	KNOWN	NA	NA
chr11	45910136	45910166	11442[gene=ENSMUSG00000006169][PH=6][PH0=0.17][P=2.6e-04]	6	+	3	ENSMUSG00000006169	Clint1	3'UTR	protein_coding	KNOWN	NA	NA
chr11	45910306	45910336	11475[gene=ENSMUSG00000006169][PH=15][PH0=0.17][P=4.0e-13]	15	+	4	ENSMUSG00000006169	Clint1	3'UTR	protein_coding	KNOWN	NA	NA
chr11	45909741	45909771	11416[gene=ENSMUSG00000006169][PH=17][PH0=0.17][P=4.0e-13]	17	+	5	ENSMUSG00000006169	Clint1	3'UTR	protein_coding	KNOWN	NA	NA
chr11	45910262	45910292	11464[gene=ENSMUSG00000006169][PH=6][PH0=0.17][P=2.6e-04]	6	+	4	ENSMUSG00000006169	Clint1	3'UTR	protein_coding	KNOWN	NA	NA
chr11	45909382	45909412	11396[gene=ENSMUSG00000006169][PH=7][PH0=0.17][P=7.2e-06]	7	+	3	ENSMUSG00000006169	Clint1	3'UTR	protein_coding	KNOWN	NA	NA
chr11	45910483	45910513	11509[gene=ENSMUSG00000006169][PH=5][PH0=0.17][P=7.7e-03]	5	+	2	ENSMUSG00000006169	Clint1	3'UTR	protein_coding	KNOWN	NA	NA
chr11	45910195	45910225	11454[gene=ENSMUSG00000006169][PH=8][PH0=0.17][P=1.7e-07]	8	+	3	ENSMUSG00000006169	Clint1	3'UTR	protein_coding	KNOWN	NA	NA
chr13	29780402	29780432	3724[gene=ENSMUSG00000006191][PH=4][PH0=0.01][P=9.1e-05]	4	-	1	ENSMUSG00000006191	Cdkal1	intron	protein_coding	KNOWN	NA	NA
chr4	141467147	141467177	32306[gene=ENSMUSG00000006215][PH=8][PH0=0.03][P=2.0e-13]	8	+	5	ENSMUSG00000006215	Zbtb17	3'UTR	protein_coding	KNOWN	NA	NA
chr5	88761554	88761584	12835[gene=ENSMUSG00000006262][PH=4][PH0=0.08][P=8.8e-03]	4	+	3	ENSMUSG00000006262	Mob1b	3'UTR	protein_coding	KNOWN	NA	NA
chr5	88760139	88760169	12804[gene=ENSMUSG00000006262][PH=6][PH0=0.08][P=2.9e-06]	6	+	3	ENSMUSG00000006262	Mob1b	3'UTR	protein_coding	KNOWN	NA	NA
chr5	88756904	88756934	12741[gene=ENSMUSG00000006262][PH=10][PH0=0.08][P=3.0e-13]	10	+	3	ENSMUSG00000006262	Mob1b	3'UTR	protein_coding	KNOWN	NA	NA
chr5	88756460	88756490	12718[gene=ENSMUSG00000006262][PH=5][PH0=0.08][P=1.8e-04]	5	+	4	ENSMUSG00000006262	Mob1b	3'UTR	protein_coding	KNOWN	NA	NA
chr8	69113656	69113686	7008[gene=ENSMUSG00000006273][PH=9][PH0=0.05][P=1.0e-13]	9	+	4	ENSMUSG00000006273	Atp6v1b2	3'UTR	protein_coding	KNOWN	NA	NA
chr1	74248152	74248182	10604[gene=ENSMUSG00000006304][PH=18][PH0=0.13][P=1.0e-100]	18	+	5	ENSMUSG00000006304	Arpc2	CDS	protein_coding	KNOWN	NA	NA
chr1	74267981	74268011	10748[gene=ENSMUSG00000006304][PH=7][PH0=0.13][P=6.6e-07]	7	+	3	ENSMUSG00000006304	Arpc2	3'UTR	protein_coding	KNOWN	NA	NA
chr1	74268079	74268109	10759[gene=ENSMUSG00000006304][PH=8][PH0=0.13][P=1.2e-08]	8	+	3	ENSMUSG00000006304	Arpc2	3'UTR	protein_coding	KNOWN	NA	NA
chr7	30568882	30568912	3947[gene=ENSMUSG00000006307][PH=9][PH0=0.05][P=8.8e-14]	9	-	3	ENSMUSG00000006307	Kmt2b	3'UTR	protein_coding	KNOWN	NA	NA
chr4	118431421	118431451	23658[gene=ENSMUSG00000006390][PH=5][PH0=0.03][P=4.2e-07]	5	+	4	ENSMUSG00000006390	Elovl1	CDS	protein_coding	KNOWN	NA	NA
chr1	171358139	171358169	28802[gene=ENSMUSG00000006412][PH=9][PH0=0.07][P=3.5e-13]	9	+	4	ENSMUSG00000006412	Pfdn2	3'UTR	protein_coding	KNOWN	NA	NA
chr1	171356537	171356567	28780[gene=ENSMUSG00000006412][PH=4][PH0=0.07][P=1.8e-03]	4	+	4	ENSMUSG00000006412	Pfdn2	CDS	protein_coding	KNOWN	NA	NA
chr2	71883430	71883460	17702[gene=ENSMUSG00000006494][PH=5][PH0=0.02][P=3.6e-07]	5	+	3	ENSMUSG00000006494	Pdk1	CDS	protein_coding	KNOWN	NA	NA
chr14	30819183	30819213	6804[gene=ENSMUSG00000006527][PH=15][PH0=0.04][P=1.0e-100]	15	+	4	ENSMUSG00000006527	Sfmbt1	3'UTR	protein_coding	KNOWN	NA	NA
chr14	30819379	30819409	6824[gene=ENSMUSG00000006527][PH=7][PH0=0.04][P=1.1e-09]	7	+	3	ENSMUSG00000006527	Sfmbt1	3'UTR	protein_coding	KNOWN	NA	NA
chr8	122573102	122573132	22965[gene=ENSMUSG00000006585][PH=3][PH0=0.01][P=8.3e-05]	3	+	2	ENSMUSG00000006585	Cdt1	3'UTR|intron	protein_coding	KNOWN	NA	NA
chr9	108560129	108560159	24651[gene=ENSMUSG00000006673][PH=8][PH0=0.10][P=2.4e-09]	8	+	4	ENSMUSG00000006673	Qrich1	3'UTR	protein_coding	KNOWN	NA	NA
chr9	108559868	108559898	24625[gene=ENSMUSG00000006673][PH=9][PH0=0.10][P=3.0e-11]	9	+	4	ENSMUSG00000006673	Qrich1	3'UTR	protein_coding	KNOWN	NA	NA
chr9	108559951	108559981	24638[gene=ENSMUSG00000006673][PH=5][PH0=0.10][P=5.1e-04]	5	+	2	ENSMUSG00000006673	Qrich1	3'UTR	protein_coding	KNOWN	NA	NA
chr9	108502299	108502329	24423[gene=ENSMUSG00000006676][PH=7][PH0=0.04][P=9.3e-11]	7	+	4	ENSMUSG00000006676	Usp19	3'UTR	protein_coding	KNOWN	NA	NA
chr4	137320587	137320617	21784[gene=ENSMUSG00000006699][PH=9][PH0=0.11][P=4.5e-11]	9	-	4	ENSMUSG00000006699	Cdc42	3'UTR	protein_coding	KNOWN	NA	NA
chr17	31605872	31605902	8758[gene=ENSMUSG00000006705][PH=6][PH0=0.03][P=1.2e-08]	6	+	4	ENSMUSG00000006705	Pknox1	3'UTR	protein_coding	KNOWN	NA	NA
chr10	127067253	127067283	26350[gene=ENSMUSG00000006728][PH=8][PH0=0.07][P=5.9e-11]	8	+	4	ENSMUSG00000006728	Cdk4	3'UTR	protein_coding	KNOWN	NA	NA
chr10	127067133	127067163	26339[gene=ENSMUSG00000006728][PH=5][PH0=0.07][P=3.1e-05]	5	+	3	ENSMUSG00000006728	Cdk4	3'UTR	protein_coding	KNOWN	NA	NA
chr10	127168048	127168078	26467[gene=ENSMUSG00000006731][PH=6][PH0=0.20][P=1.8e-04]	6	+	3	ENSMUSG00000006731	B4galnt1	intron	protein_coding	KNOWN	NA	NA
chr10	127171450	127171480	26520[gene=ENSMUSG00000006731][PH=11][PH0=0.20][P=1.8e-12]	11	+	4	ENSMUSG00000006731	B4galnt1	intron	protein_coding	KNOWN	NA	NA
chr18	6201496	6201526	683[gene=ENSMUSG00000006740][PH=7][PH0=0.08][P=2.4e-08]	7	-	4	ENSMUSG00000006740	Kif5b	3'UTR	protein_coding	KNOWN	NA	NA
chr18	6226874	6226904	808[gene=ENSMUSG00000006740][PH=5][PH0=0.08][P=1.2e-04]	5	-	3	ENSMUSG00000006740	Kif5b	CDS	protein_coding	KNOWN	NA	NA
chr18	6203258	6203288	700[gene=ENSMUSG00000006740][PH=4][PH0=0.08][P=6.6e-03]	4	-	2	ENSMUSG00000006740	Kif5b	3'UTR	protein_coding	KNOWN	NA	NA
chr17	13015313	13015343	2508[gene=ENSMUSG00000006818][PH=14][PH0=0.07][P=1.0e-100]	14	+	3	ENSMUSG00000006818	Sod2	3'UTR	protein_coding	KNOWN	NA	NA
chr9	120960099	120960129	27916[gene=ENSMUSG00000006932][PH=8][PH0=0.10][P=1.8e-09]	8	+	4	ENSMUSG00000006932	Ctnnb1	3'UTR	protein_coding	KNOWN	NA	NA
chr9	120960281	120960311	27944[gene=ENSMUSG00000006932][PH=7][PH0=0.10][P=1.2e-07]	7	+	3	ENSMUSG00000006932	Ctnnb1	3'UTR	protein_coding	KNOWN	NA	NA
chr9	120495265	120495295	27737[gene=ENSMUSG00000006941][PH=10][PH0=0.05][P=1.0e-100]	10	+	3	ENSMUSG00000006941	Eif1b	3'UTR	protein_coding	KNOWN	NA	NA
chr17	34935286	34935316	9637[gene=ENSMUSG00000007034][PH=4][PH0=0.02][P=1.4e-05]	4	+	2	ENSMUSG00000007038	Neu1	3'UTR	protein_coding	KNOWN	NA	NA
chr17	35058674	35058704	9712[gene=ENSMUSG00000096022][PH=13][PH0=0.08][P=3.0e-14]	13	+	5	ENSMUSG00000007041	Clic1	3'UTR	protein_coding	KNOWN	NA	NA
chr17	34985685	34985715	9651[gene=ENSMUSG00000007033][PH=3][PH0=0.01][P=5.5e-04]	3	+	2	ENSMUSG00000007050	Lsm2	3'UTR	protein_coding	KNOWN	NA	NA
chr12	111656118	111656148	21236[gene=ENSMUSG00000007411][PH=4][PH0=0.05][P=1.8e-03]	4	+	2	ENSMUSG00000007411	Mark3	3'UTR	protein_coding	KNOWN	NA	NA
chr5	3641245	3641275	104[gene=ENSMUSG00000007415][PH=9][PH0=0.07][P=1.0e-12]	9	-	3	ENSMUSG00000007415	Gatad1	3'UTR|intron	protein_coding	KNOWN	NA	NA
chr5	3640868	3640898	79[gene=ENSMUSG00000007415][PH=10][PH0=0.07][P=1.0e-100]	10	-	4	ENSMUSG00000007415	Gatad1	3'UTR|intron	protein_coding	KNOWN	NA	NA
chr6	122317389	122317419	19618[gene=ENSMUSG00000007458][PH=14][PH0=0.19][P=1.0e-100]	14	+	5	ENSMUSG00000007458	M6pr	3'UTR	protein_coding	KNOWN	NA	NA
chr6	122317568	122317598	19642[gene=ENSMUSG00000007458][PH=5][PH0=0.19][P=3.8e-03]	5	+	3	ENSMUSG00000007458	M6pr	3'UTR	protein_coding	KNOWN	NA	NA
chr6	122316754	122316784	19579[gene=ENSMUSG00000007458][PH=6][PH0=0.19][P=1.4e-04]	6	+	3	ENSMUSG00000007458	M6pr	3'UTR	protein_coding	KNOWN	NA	NA
chr6	122317634	122317664	19655[gene=ENSMUSG00000007458][PH=21][PH0=0.19][P=1.0e-100]	21	+	3	ENSMUSG00000007458	M6pr	3'UTR	protein_coding	KNOWN	NA	NA
chr6	122316915	122316945	19590[gene=ENSMUSG00000007458][PH=5][PH0=0.19][P=3.8e-03]	5	+	4	ENSMUSG00000007458	M6pr	3'UTR	protein_coding	KNOWN	NA	NA
chr6	122317322	122317352	19607[gene=ENSMUSG00000007458][PH=5][PH0=0.19][P=3.8e-03]	5	+	3	ENSMUSG00000007458	M6pr	3'UTR	protein_coding	KNOWN	NA	NA
chr2	30262460	30262490	8025[gene=ENSMUSG00000007476][PH=5][PH0=0.02][P=1.2e-07]	5	+	3	ENSMUSG00000007476	Lrrc8a	3'UTR|intron	protein_coding	KNOWN	NA	NA
chr17	20965866	20965896	4017[gene=ENSMUSG00000007564][PH=9][PH0=0.04][P=1.0e-100]	9	+	2	ENSMUSG00000007564	Ppp2r1a	3'UTR	protein_coding	KNOWN	NA	NA
chr4	47393453	47393483	13866[gene=ENSMUSG00000007613][PH=10][PH0=0.09][P=1.1e-16]	10	+	4	ENSMUSG00000007613	Tgfbr1	CDS	protein_coding	KNOWN	NA	NA
chr13	93402995	93403025	16996[gene=ENSMUSG00000007617][PH=4][PH0=0.05][P=2.5e-03]	4	+	3	ENSMUSG00000007617	Homer1	3'UTR	protein_coding	KNOWN	NA	NA
chr13	93356715	93356745	16853[gene=ENSMUSG00000007617][PH=4][PH0=0.05][P=2.5e-03]	4	+	3	ENSMUSG00000007617	Homer1	3'UTR|intron	protein_coding	KNOWN	NA	NA
chr13	93356238	93356268	16837[gene=ENSMUSG00000007617][PH=4][PH0=0.05][P=2.5e-03]	4	+	4	ENSMUSG00000007617	Homer1	3'UTR|intron	protein_coding	KNOWN	NA	NA
chr13	93403779	93403809	17017[gene=ENSMUSG00000007617][PH=4][PH0=0.05][P=2.5e-03]	4	+	2	ENSMUSG00000007617	Homer1	3'UTR	protein_coding	KNOWN	NA	NA
chr13	93403746	93403776	17013[gene=ENSMUSG00000007617][PH=6][PH0=0.05][P=3.0e-07]	6	+	2	ENSMUSG00000007617	Homer1	3'UTR	protein_coding	KNOWN	NA	NA
chr11	42531368	42531398	10405[gene=ENSMUSG00000007653][PH=2][PH0=0.00][P=6.9e-04]	2	+	2	ENSMUSG00000007653	Gabrb2	intron	protein_coding	KNOWN	NA	NA
chr9	75060056	75060086	19427[gene=ENSMUSG00000007656][PH=7][PH0=0.06][P=2.4e-09]	7	+	3	ENSMUSG00000007656	Arpp19	3'UTR	protein_coding	KNOWN	NA	NA
chr9	75057746	75057776	19394[gene=ENSMUSG00000007656][PH=4][PH0=0.06][P=1.5e-03]	4	+	3	ENSMUSG00000007656	Arpp19	3'UTR	protein_coding	KNOWN	NA	NA
chr2	152780882	152780912	30724[gene=ENSMUSG00000007659][PH=14][PH0=0.22][P=1.0e-100]	14	-	5	ENSMUSG00000007659	Bcl2l1	3'UTR	protein_coding	KNOWN	NA	NA
chr2	152780701	152780731	30700[gene=ENSMUSG00000007659][PH=8][PH0=0.22][P=1.2e-06]	8	-	4	ENSMUSG00000007659	Bcl2l1	3'UTR	protein_coding	KNOWN	NA	NA
chr2	152814946	152814976	31085[gene=ENSMUSG00000007659][PH=7][PH0=0.22][P=4.0e-05]	7	-	3	ENSMUSG00000007659	Bcl2l1	intron	protein_coding	KNOWN	NA	NA
chr5	145245763	145245793	25726[gene=ENSMUSG00000007812][PH=8][PH0=0.08][P=1.5e-10]	8	+	5	ENSMUSG00000007812	Zfp655	3'UTR	protein_coding	KNOWN	NA	NA
chr9	108337532	108337562	24249[gene=ENSMUSG00000007815][PH=6][PH0=0.06][P=3.2e-07]	6	+	2	ENSMUSG00000007815	Rhoa	3'UTR	protein_coding	KNOWN	NA	NA
chr9	108336954	108336984	24236[gene=ENSMUSG00000007815][PH=7][PH0=0.06][P=3.1e-09]	7	+	2	ENSMUSG00000007815	Rhoa	3'UTR	protein_coding	KNOWN	NA	NA
chr14	25666558	25666588	4414[gene=ENSMUSG00000007817][PH=6][PH0=0.02][P=6.2e-09]	6	+	4	ENSMUSG00000007817	Zmiz1	3'UTR	protein_coding	KNOWN	NA	NA
chr14	25666480	25666510	4405[gene=ENSMUSG00000007817][PH=4][PH0=0.02][P=2.4e-04]	4	+	3	ENSMUSG00000007817	Zmiz1	3'UTR	protein_coding	KNOWN	NA	NA
chr14	25665854	25665884	4385[gene=ENSMUSG00000007817][PH=4][PH0=0.02][P=2.4e-04]	4	+	2	ENSMUSG00000007817	Zmiz1	3'UTR	protein_coding	KNOWN	NA	NA
chr14	25665876	25665906	4387[gene=ENSMUSG00000007817][PH=4][PH0=0.02][P=2.4e-04]	4	+	3	ENSMUSG00000007817	Zmiz1	3'UTR	protein_coding	KNOWN	NA	NA
chr13	58126729	58126759	10624[gene=ENSMUSG00000007836][PH=13][PH0=0.59][P=3.8e-10]	13	-	4	ENSMUSG00000007836	Hnrnpa0	3'UTR	protein_coding	KNOWN	NA	NA
chr13	58127082	58127112	10696[gene=ENSMUSG00000007836][PH=8][PH0=0.59][P=5.0e-04]	8	-	4	ENSMUSG00000007836	Hnrnpa0	3'UTR	protein_coding	KNOWN	NA	NA
chr13	58126916	58126946	10655[gene=ENSMUSG00000007836][PH=21][PH0=0.59][P=3.7e-14]	21	-	5	ENSMUSG00000007836	Hnrnpa0	3'UTR	protein_coding	KNOWN	NA	NA
chr13	58126364	58126394	10576[gene=ENSMUSG00000007836][PH=7][PH0=0.59][P=5.8e-03]	7	-	2	ENSMUSG00000007836	Hnrnpa0	3'UTR	protein_coding	KNOWN	NA	NA
chr13	58127152	58127182	10729[gene=ENSMUSG00000007836][PH=82][PH0=0.59][P=3.7e-14]	82	-	5	ENSMUSG00000007836	Hnrnpa0	3'UTR	protein_coding	KNOWN	NA	NA
chr13	58126390	58126420	10582[gene=ENSMUSG00000007836][PH=9][PH0=0.59][P=3.7e-05]	9	-	4	ENSMUSG00000007836	Hnrnpa0	3'UTR	protein_coding	KNOWN	NA	NA
chr13	58126962	58126992	10674[gene=ENSMUSG00000007836][PH=7][PH0=0.59][P=5.8e-03]	7	-	4	ENSMUSG00000007836	Hnrnpa0	3'UTR	protein_coding	KNOWN	NA	NA
chr13	58127017	58127047	10683[gene=ENSMUSG00000007836][PH=7][PH0=0.59][P=5.8e-03]	7	-	4	ENSMUSG00000007836	Hnrnpa0	3'UTR	protein_coding	KNOWN	NA	NA
chr11	50386355	50386385	12767[gene=ENSMUSG00000007850][PH=9][PH0=0.25][P=3.4e-08]	9	+	4	ENSMUSG00000007850	Hnrnph1	3'UTR	protein_coding	KNOWN	NA	NA
chr4	136145330	136145360	29894[gene=ENSMUSG00000088614][PH=3][PH0=0.04][P=8.7e-03]	3	+	2	ENSMUSG00000007872	Id3	3'UTR|intron	protein_coding	KNOWN	NA	NA
chr4	136145284	136145314	29890[gene=ENSMUSG00000088614][PH=3][PH0=0.04][P=8.7e-03]	3	+	3	ENSMUSG00000007872	Id3	3'UTR|intron	protein_coding	KNOWN	NA	NA
chr4	133680083	133680113	19989[gene=ENSMUSG00000007880][PH=7][PH0=0.10][P=2.6e-07]	7	-	4	ENSMUSG00000007880	Arid1a	3'UTR	protein_coding	KNOWN	NA	NA
chrX	10719639	10719669	394[gene=ENSMUSG00000008035][PH=5][PH0=0.03][P=4.4e-07]	5	+	3	ENSMUSG00000008035	Mid1ip1	3'UTR	protein_coding	KNOWN	NA	NA
chrX	10719544	10719574	386[gene=ENSMUSG00000008035][PH=4][PH0=0.03][P=5.6e-05]	4	+	4	ENSMUSG00000008035	Mid1ip1	3'UTR	protein_coding	KNOWN	NA	NA
chr2	90780337	90780367	20313[gene=ENSMUSG00000008200][PH=6][PH0=0.07][P=1.1e-06]	6	+	3	ENSMUSG00000008200	Fnbp4	3'UTR	protein_coding	KNOWN	NA	NA
chr2	90780943	90780973	20342[gene=ENSMUSG00000008200][PH=4][PH0=0.07][P=4.5e-03]	4	+	3	ENSMUSG00000008200	Fnbp4	3'UTR	protein_coding	KNOWN	NA	NA
chr2	90780824	90780854	20333[gene=ENSMUSG00000008200][PH=8][PH0=0.07][P=1.3e-10]	8	+	4	ENSMUSG00000008200	Fnbp4	3'UTR	protein_coding	KNOWN	NA	NA
chr2	143071610	143071640	30619[gene=ENSMUSG00000008333][PH=14][PH0=0.06][P=1.0e-100]	14	+	4	ENSMUSG00000008333	Snrpb2	3'UTR	protein_coding	KNOWN	NA	NA
chr5	125388220	125388250	21966[gene=ENSMUSG00000008348][PH=4][PH0=0.08][P=2.6e-03]	4	-	2	ENSMUSG00000008348	Ubc	CDS	protein_coding	KNOWN	NA	NA
chr5	125385975	125386005	21940[gene=ENSMUSG00000008348][PH=12][PH0=0.08][P=4.2e-14]	12	-	3	ENSMUSG00000008348	Ubc	3'UTR	protein_coding	KNOWN	NA	NA
chr10	93249341	93249371	17555[gene=ENSMUSG00000008398][PH=4][PH0=0.03][P=4.3e-04]	4	-	2	ENSMUSG00000008398	Elk3	3'UTR	protein_coding	KNOWN	NA	NA
chr1	152774586	152774616	24116[gene=ENSMUSG00000008475][PH=13][PH0=0.21][P=1.0e-100]	13	+	3	ENSMUSG00000008475	Arpc5	3'UTR	protein_coding	KNOWN	NA	NA
chr1	152774293	152774323	24084[gene=ENSMUSG00000008475][PH=8][PH0=0.21][P=2.6e-07]	8	+	4	ENSMUSG00000008475	Arpc5	CDS	protein_coding	KNOWN	NA	NA
chr1	152771477	152771507	24050[gene=ENSMUSG00000008475][PH=26][PH0=0.21][P=1.0e-100]	26	+	4	ENSMUSG00000008475	Arpc5	CDS|intron	protein_coding	KNOWN	NA	NA
chr1	152774647	152774677	24131[gene=ENSMUSG00000008475][PH=6][PH0=0.21][P=2.5e-04]	6	+	3	ENSMUSG00000008475	Arpc5	3'UTR	protein_coding	KNOWN	NA	NA
chr1	152774791	152774821	24144[gene=ENSMUSG00000008475][PH=13][PH0=0.21][P=1.0e-100]	13	+	4	ENSMUSG00000008475	Arpc5	3'UTR	protein_coding	KNOWN	NA	NA
chrX	74272576	74272606	6143[gene=ENSMUSG00000008682][PH=3][PH0=0.02][P=2.3e-03]	3	+	3	ENSMUSG00000008682	Rpl10	intron	protein_coding	KNOWN	NA	NA
chr7	118109082	118109112	17604[gene=ENSMUSG00000008683][PH=7][PH0=0.08][P=1.1e-08]	7	-	4	ENSMUSG00000008683	Rps15a	3'UTR|CDS	protein_coding	KNOWN	NA	NA
chr3	103739959	103739989	11518[gene=ENSMUSG00000008730][PH=7][PH0=0.09][P=1.4e-07]	7	-	4	ENSMUSG00000008730	Hipk1	3'UTR	protein_coding	KNOWN	NA	NA
chr3	103741915	103741945	11569[gene=ENSMUSG00000008730][PH=8][PH0=0.09][P=1.9e-09]	8	-	3	ENSMUSG00000008730	Hipk1	3'UTR	protein_coding	KNOWN	NA	NA
chr3	103742983	103743013	11647[gene=ENSMUSG00000008730][PH=15][PH0=0.09][P=1.8e-13]	15	-	5	ENSMUSG00000008730	Hipk1	3'UTR	protein_coding	KNOWN	NA	NA
chr3	103741556	103741586	11550[gene=ENSMUSG00000008730][PH=6][PH0=0.09][P=8.8e-06]	6	-	3	ENSMUSG00000008730	Hipk1	3'UTR	protein_coding	KNOWN	NA	NA
chr3	103742747	103742777	11615[gene=ENSMUSG00000008730][PH=10][PH0=0.09][P=3.6e-13]	10	-	5	ENSMUSG00000008730	Hipk1	3'UTR	protein_coding	KNOWN	NA	NA
chr3	103742607	103742637	11601[gene=ENSMUSG00000008730][PH=12][PH0=0.09][P=1.8e-13]	12	-	5	ENSMUSG00000008730	Hipk1	3'UTR	protein_coding	KNOWN	NA	NA
chr3	103743169	103743199	11672[gene=ENSMUSG00000008730][PH=10][PH0=0.09][P=3.6e-13]	10	-	4	ENSMUSG00000008730	Hipk1	3'UTR	protein_coding	KNOWN	NA	NA
chr3	100616971	100617001	10595[gene=ENSMUSG00000008763][PH=7][PH0=0.04][P=1.1e-09]	7	-	4	ENSMUSG00000008763	Man1a2	CDS	protein_coding	KNOWN	NA	NA
chr3	100566166	100566196	10482[gene=ENSMUSG00000008763][PH=4][PH0=0.04][P=1.8e-03]	4	-	2	ENSMUSG00000008763	Man1a2	3'UTR	protein_coding	KNOWN	NA	NA
chr3	100591882	100591912	10541[gene=ENSMUSG00000008763][PH=4][PH0=0.04][P=1.8e-03]	4	-	3	ENSMUSG00000008763	Man1a2	CDS	protein_coding	KNOWN	NA	NA
chr12	85272455	85272485	10995[gene=ENSMUSG00000008822][PH=5][PH0=0.01][P=1.8e-08]	5	-	3	ENSMUSG00000008822	Acyp1	3'UTR	protein_coding	KNOWN	NA	NA
chr16	84861126	84861156	19756[gene=ENSMUSG00000008976][PH=10][PH0=0.08][P=1.1e-13]	10	+	4	ENSMUSG00000008976	Gabpa	3'UTR|intron	protein_coding	KNOWN	NA	NA
chr16	84860785	84860815	19741[gene=ENSMUSG00000008976][PH=4][PH0=0.08][P=6.8e-03]	4	+	2	ENSMUSG00000008976	Gabpa	3'UTR|intron	protein_coding	KNOWN	NA	NA
chr16	84861271	84861301	19775[gene=ENSMUSG00000008976][PH=5][PH0=0.08][P=1.4e-04]	5	+	3	ENSMUSG00000008976	Gabpa	3'UTR|intron	protein_coding	KNOWN	NA	NA
chr16	84861943	84861973	19808[gene=ENSMUSG00000008976][PH=4][PH0=0.08][P=6.8e-03]	4	+	1	ENSMUSG00000008976	Gabpa	3'UTR|intron	protein_coding	KNOWN	NA	NA
chr2	37350412	37350442	9983[gene=ENSMUSG00000009030][PH=5][PH0=0.04][P=3.0e-06]	5	-	3	ENSMUSG00000009030	Pdcl	3'UTR	protein_coding	KNOWN	NA	NA
chr15	79362506	79362536	16005[gene=ENSMUSG00000009035][PH=8][PH0=0.02][P=1.5e-13]	8	-	3	ENSMUSG00000009035	Tmem184b	3'UTR	protein_coding	KNOWN	NA	NA
chr15	79360869	79360899	15992[gene=ENSMUSG00000009035][PH=3][PH0=0.02][P=9.7e-03]	3	-	2	ENSMUSG00000009035	Tmem184b	3'UTR	protein_coding	KNOWN	NA	NA
chr11	4765852	4765882	709[gene=ENSMUSG00000009073][PH=5][PH0=0.02][P=5.4e-07]	5	-	5	ENSMUSG00000009073	Nf2	3'UTR	protein_coding	KNOWN	NA	NA
chr2	74520760	74520790	18286[gene=ENSMUSG00000009207][PH=4][PH0=0.04][P=6.6e-04]	4	-	2	ENSMUSG00000009207	Lnp	3'UTR	protein_coding	KNOWN	NA	NA
chr10	77598535	77598565	15980[gene=ENSMUSG00000009291][PH=3][PH0=0.03][P=9.9e-03]	3	+	3	ENSMUSG00000009291	Pttg1ip	3'UTR	protein_coding	KNOWN	NA	NA
chr10	77645901	77645931	16060[gene=ENSMUSG00000020265][PH=6][PH0=0.03][P=1.3e-08]	6	+	3	ENSMUSG00000009293	Ube2g2	3'UTR	protein_coding	KNOWN	NA	NA
chrX	20935138	20935168	1692[gene=ENSMUSG00000009406][PH=4][PH0=0.02][P=1.7e-05]	4	-	3	ENSMUSG00000009406	Elk1	3'UTR	protein_coding	KNOWN	NA	NA
chrX	20934989	20935019	1682[gene=ENSMUSG00000009406][PH=3][PH0=0.02][P=2.6e-03]	3	-	2	ENSMUSG00000009406	Elk1	3'UTR	protein_coding	KNOWN	NA	NA
chr13	98841576	98841606	16538[gene=ENSMUSG00000009470][PH=5][PH0=0.13][P=3.3e-03]	5	-	4	ENSMUSG00000009470	Tnpo1	3'UTR	protein_coding	KNOWN	NA	NA
chr13	98841491	98841521	16522[gene=ENSMUSG00000009470][PH=12][PH0=0.13][P=1.0e-100]	12	-	3	ENSMUSG00000009470	Tnpo1	3'UTR	protein_coding	KNOWN	NA	NA
chr13	98842237	98842267	16632[gene=ENSMUSG00000009470][PH=5][PH0=0.13][P=3.3e-03]	5	-	3	ENSMUSG00000009470	Tnpo1	3'UTR	protein_coding	KNOWN	NA	NA
chr13	98842944	98842974	16667[gene=ENSMUSG00000009470][PH=5][PH0=0.13][P=3.3e-03]	5	-	3	ENSMUSG00000009470	Tnpo1	3'UTR	protein_coding	KNOWN	NA	NA
chr13	98843238	98843268	16704[gene=ENSMUSG00000009470][PH=20][PH0=0.13][P=1.0e-100]	20	-	5	ENSMUSG00000009470	Tnpo1	3'UTR	protein_coding	KNOWN	NA	NA
chr13	98841915	98841945	16589[gene=ENSMUSG00000009470][PH=45][PH0=0.13][P=1.0e-100]	45	-	5	ENSMUSG00000009470	Tnpo1	3'UTR	protein_coding	KNOWN	NA	NA
chr13	98840760	98840790	16480[gene=ENSMUSG00000009470][PH=15][PH0=0.13][P=1.0e-100]	15	-	4	ENSMUSG00000009470	Tnpo1	3'UTR	protein_coding	KNOWN	NA	NA
chr13	98843599	98843629	16740[gene=ENSMUSG00000009470][PH=8][PH0=0.13][P=3.5e-08]	8	-	3	ENSMUSG00000009470	Tnpo1	3'UTR	protein_coding	KNOWN	NA	NA
chr2	118475930	118475960	24574[gene=ENSMUSG00000009549][PH=29][PH0=0.14][P=4.1e-14]	29	-	4	ENSMUSG00000009549	Srp14	3'UTR	protein_coding	KNOWN	NA	NA
chr2	32682611	32682641	8643[gene=ENSMUSG00000009566][PH=3][PH0=0.01][P=7.0e-04]	3	-	2	ENSMUSG00000009566	Fpgs	3'UTR	protein_coding	KNOWN	NA	NA
chr16	13392415	13392445	1525[gene=ENSMUSG00000009569][PH=4][PH0=0.01][P=2.3e-05]	4	+	1	ENSMUSG00000009569	Mkl2	intron	protein_coding	KNOWN	NA	NA
chr16	13414451	13414481	1535[gene=ENSMUSG00000009569][PH=4][PH0=0.01][P=2.3e-05]	4	+	3	ENSMUSG00000009569	Mkl2	3'UTR	protein_coding	KNOWN	NA	NA
chr15	103196184	103196214	23091[gene=ENSMUSG00000009575][PH=4][PH0=0.04][P=6.8e-04]	4	-	3	ENSMUSG00000009575	Cbx5	3'UTR	protein_coding	KNOWN	NA	NA
chr15	103193354	103193384	23066[gene=ENSMUSG00000009575][PH=5][PH0=0.04][P=6.9e-06]	5	-	3	ENSMUSG00000009575	Cbx5	3'UTR	protein_coding	KNOWN	NA	NA
chr8	33619610	33619640	3395[gene=ENSMUSG00000009630][PH=20][PH0=0.07][P=1.0e-100]	20	+	4	ENSMUSG00000009630	Ppp2cb	3'UTR	protein_coding	KNOWN	NA	NA
chr10	59448370	59448400	10339[gene=ENSMUSG00000009647][PH=4][PH0=0.03][P=1.1e-03]	4	-	3	ENSMUSG00000009647	Mcu	3'UTR	protein_coding	KNOWN	NA	NA
chr10	75081014	75081044	15193[gene=ENSMUSG00000009681][PH=3][PH0=0.01][P=9.6e-04]	3	+	2	ENSMUSG00000009681	Bcr	intron	protein_coding	KNOWN	NA	NA
chr10	75079854	75079884	15186[gene=ENSMUSG00000009681][PH=4][PH0=0.01][P=2.6e-06]	4	+	1	ENSMUSG00000009681	Bcr	intron	protein_coding	KNOWN	NA	NA
chr10	75182653	75182683	15226[gene=ENSMUSG00000009681][PH=3][PH0=0.01][P=9.6e-04]	3	+	2	ENSMUSG00000009681	Bcr	3'UTR	protein_coding	KNOWN	NA	NA
chr9	113976299	113976329	26560[gene=ENSMUSG00000009741][PH=4][PH0=0.07][P=4.1e-03]	4	+	4	ENSMUSG00000009741	Ubp1	3'UTR|intron	protein_coding	KNOWN	NA	NA
chr1	106724138	106724168	22338[gene=ENSMUSG00000009905][PH=5][PH0=0.04][P=6.2e-06]	5	-	4	ENSMUSG00000009905	Kdsr	3'UTR	protein_coding	KNOWN	NA	NA
chr1	106771591	106771621	22433[gene=ENSMUSG00000009907][PH=4][PH0=0.06][P=2.0e-03]	4	-	2	ENSMUSG00000009907	Vps4b	3'UTR|intron	protein_coding	KNOWN	NA	NA
chr1	106771015	106771045	22415[gene=ENSMUSG00000009907][PH=5][PH0=0.06][P=3.0e-05]	5	-	3	ENSMUSG00000009907	Vps4b	3'UTR|intron	protein_coding	KNOWN	NA	NA
chr11	61244871	61244901	15946[gene=ENSMUSG00000010025][PH=4][PH0=0.01][P=2.8e-06]	4	-	2	ENSMUSG00000010025	Aldh3a2	3'UTR|intron	protein_coding	KNOWN	NA	NA
chr19	8713720	8713750	6811[gene=ENSMUSG00000010095][PH=5][PH0=0.06][P=2.1e-05]	5	-	3	ENSMUSG00000010095	Slc3a2	CDS	protein_coding	KNOWN	NA	NA
chr19	8764399	8764429	2856[gene=ENSMUSG00000010110][PH=4][PH0=0.06][P=1.7e-03]	4	+	4	ENSMUSG00000010097	Nxf1	downstream 10K|intron	protein_coding	KNOWN	NA	NA
chr9	21074899	21074929	1746[gene=ENSMUSG00000010205][PH=16][PH0=0.14][P=1.0e-100]	16	-	3	ENSMUSG00000010205	Raver1	3'UTR	protein_coding	KNOWN	NA	NA
chr9	21075205	21075235	1777[gene=ENSMUSG00000010205][PH=18][PH0=0.14][P=1.0e-100]	18	-	5	ENSMUSG00000010205	Raver1	3'UTR	protein_coding	KNOWN	NA	NA
chr11	78287679	78287709	24372[gene=ENSMUSG00000010277][PH=4][PH0=0.03][P=1.5e-04]	4	+	3	ENSMUSG00000010277	2610507B11Rik	CDS|intron	protein_coding	KNOWN	NA	NA
chr1	43114495	43114525	3779[gene=ENSMUSG00000010290][PH=4][PH0=0.05][P=5.6e-04]	4	+	2	ENSMUSG00000010290	AI597479	3'UTR	protein_coding	KNOWN	NA	NA
chr1	43115916	43115946	3812[gene=ENSMUSG00000010290][PH=5][PH0=0.05][P=6.6e-06]	5	+	2	ENSMUSG00000010290	AI597479	3'UTR	protein_coding	KNOWN	NA	NA
chr11	87423052	87423082	27655[gene=ENSMUSG00000010342][PH=5][PH0=0.01][P=2.6e-09]	5	+	3	ENSMUSG00000010342	Tex14	intron	protein_coding	KNOWN	NA	NA
chr14	55662274	55662304	7070[gene=ENSMUSG00000010376][PH=4][PH0=0.04][P=2.6e-04]	4	-	2	ENSMUSG00000010376	Nedd8	3'UTR	protein_coding	KNOWN	NA	NA
chr11	76729668	76729698	20624[gene=ENSMUSG00000010392][PH=4][PH0=0.05][P=1.7e-03]	4	-	2	ENSMUSG00000010392	Gosr1	3'UTR	protein_coding	KNOWN	NA	NA
chr11	76726599	76726629	20556[gene=ENSMUSG00000010392][PH=5][PH0=0.05][P=2.4e-05]	5	-	4	ENSMUSG00000010392	Gosr1	3'UTR	protein_coding	KNOWN	NA	NA
chr2	181779252	181779282	40875[gene=ENSMUSG00000010505][PH=2][PH0=0.00][P=4.5e-03]	2	+	2	ENSMUSG00000010505	Myt1	intron	protein_coding	KNOWN	NA	NA
chr11	74820285	74820315	21178[gene=ENSMUSG00000010554][PH=4][PH0=0.04][P=1.0e-03]	4	+	3	ENSMUSG00000010554	Mettl16	3'UTR	protein_coding	KNOWN	NA	NA
chr12	83661298	83661328	16084[gene=ENSMUSG00000010608][PH=5][PH0=0.16][P=6.1e-03]	5	+	3	ENSMUSG00000010608	Rbm25	downstream 10K|intron	protein_coding	KNOWN	NA	NA
chr12	83682746	83682776	16258[gene=ENSMUSG00000010608][PH=5][PH0=0.16][P=6.1e-03]	5	+	4	ENSMUSG00000010608	Rbm25	3'UTR	protein_coding	KNOWN	NA	NA
chr12	83682805	83682835	16269[gene=ENSMUSG00000010608][PH=6][PH0=0.16][P=2.0e-04]	6	+	3	ENSMUSG00000010608	Rbm25	3'UTR	protein_coding	KNOWN	NA	NA
chr7	143587150	143587180	23727[gene=ENSMUSG00000010755][PH=6][PH0=0.06][P=5.1e-07]	6	-	3	ENSMUSG00000010755	Cars	CDS	protein_coding	KNOWN	NA	NA
chr2	103021929	103021959	21771[gene=ENSMUSG00000010914][PH=9][PH0=0.02][P=1.0e-100]	9	-	3	ENSMUSG00000010914	Pdhx	3'UTR	protein_coding	KNOWN	NA	NA
chr12	17546256	17546286	4444[gene=ENSMUSG00000011179][PH=22][PH0=0.10][P=4.9e-14]	22	+	4	ENSMUSG00000011179	Odc1	intron	protein_coding	KNOWN	NA	NA
chr11	46147308	46147338	11695[gene=ENSMUSG00000011256][PH=4][PH0=0.03][P=4.1e-04]	4	+	3	ENSMUSG00000011256	Adam19	3'UTR	protein_coding	KNOWN	NA	NA
chr7	29831165	29831195	3303[gene=ENSMUSG00000011427][PH=5][PH0=0.04][P=3.6e-06]	5	+	2	ENSMUSG00000011427	Zfp790	3'UTR	protein_coding	KNOWN	NA	NA
chr7	27372095	27372125	2575[gene=ENSMUSG00000011751][PH=2][PH0=0.00][P=3.3e-03]	2	-	1	ENSMUSG00000011751	Sptbn4	CDS	protein_coding	KNOWN	NA	NA
chr11	77507191	77507221	23452[gene=ENSMUSG00000011877][PH=7][PH0=0.02][P=1.1e-12]	7	+	3	ENSMUSG00000011877	Git1	3'UTR	protein_coding	KNOWN	NA	NA
chr5	114669517	114669547	17162[gene=ENSMUSG00000011884][PH=7][PH0=0.03][P=7.2e-12]	7	-	3	ENSMUSG00000011884	Gltp	3'UTR	protein_coding	KNOWN	NA	NA
chr5	114669479	114669509	17155[gene=ENSMUSG00000011884][PH=3][PH0=0.03][P=6.4e-03]	3	-	2	ENSMUSG00000011884	Gltp	3'UTR	protein_coding	KNOWN	NA	NA
chr9	70007523	70007553	17349[gene=ENSMUSG00000011958][PH=5][PH0=0.07][P=6.7e-05]	5	+	3	ENSMUSG00000011958	Bnip2	3'UTR	protein_coding	KNOWN	NA	NA
chr9	70007410	70007440	17327[gene=ENSMUSG00000011958][PH=14][PH0=0.07][P=1.0e-100]	14	+	4	ENSMUSG00000011958	Bnip2	3'UTR	protein_coding	KNOWN	NA	NA
chr9	70007320	70007350	17314[gene=ENSMUSG00000011958][PH=5][PH0=0.07][P=6.7e-05]	5	+	3	ENSMUSG00000011958	Bnip2	3'UTR	protein_coding	KNOWN	NA	NA
chr9	70007494	70007524	17346[gene=ENSMUSG00000011958][PH=4][PH0=0.07][P=3.6e-03]	4	+	4	ENSMUSG00000011958	Bnip2	3'UTR	protein_coding	KNOWN	NA	NA
chr15	98542704	98542734	21445[gene=ENSMUSG00000011960][PH=28][PH0=0.15][P=1.0e-100]	28	-	5	ENSMUSG00000011960	Ccnt1	3'UTR|intron	protein_coding	KNOWN	NA	NA
chr15	98540485	98540515	21372[gene=ENSMUSG00000011960][PH=6][PH0=0.15][P=1.1e-04]	6	-	4	ENSMUSG00000011960	Ccnt1	3'UTR|intron	protein_coding	KNOWN	NA	NA
chr15	98542766	98542796	21474[gene=ENSMUSG00000011960][PH=5][PH0=0.15][P=3.4e-03]	5	-	5	ENSMUSG00000011960	Ccnt1	3'UTR	protein_coding	KNOWN	NA	NA
chr15	98539450	98539480	21336[gene=ENSMUSG00000011960][PH=6][PH0=0.15][P=1.1e-04]	6	-	3	ENSMUSG00000011960	Ccnt1	3'UTR|intron	protein_coding	KNOWN	NA	NA
chr15	98538694	98538724	21308[gene=ENSMUSG00000011960][PH=7][PH0=0.15][P=2.7e-06]	7	-	3	ENSMUSG00000011960	Ccnt1	3'UTR	protein_coding	KNOWN	NA	NA
chr17	46258214	46258244	10572[gene=ENSMUSG00000012296][PH=7][PH0=0.03][P=2.8e-11]	7	-	5	ENSMUSG00000012296	Tjap1	3'UTR	protein_coding	KNOWN	NA	NA
chr13	90106882	90106912	16191[gene=ENSMUSG00000012422][PH=5][PH0=0.04][P=1.2e-05]	5	+	2	ENSMUSG00000012422	Tmem167	3'UTR|intron	protein_coding	KNOWN	NA	NA
chr13	17697221	17697251	2308[gene=ENSMUSG00000012429][PH=4][PH0=0.09][P=4.1e-03]	4	+	2	ENSMUSG00000012429	Mplkip	3'UTR	protein_coding	KNOWN	NA	NA
chr6	8255945	8255975	307[gene=ENSMUSG00000012483][PH=3][PH0=0.02][P=2.0e-03]	3	-	3	ENSMUSG00000012483	Rpa3	3'UTR	protein_coding	KNOWN	NA	NA
chr6	29541572	29541602	1790[gene=ENSMUSG00000012535][PH=8][PH0=0.06][P=3.7e-11]	8	-	4	ENSMUSG00000012535	Tnpo3	3'UTR	protein_coding	KNOWN	NA	NA
chr6	29547156	29547186	1806[gene=ENSMUSG00000012535][PH=8][PH0=0.06][P=3.7e-11]	8	-	3	ENSMUSG00000012535	Tnpo3	downstream 10K|intron	protein_coding	KNOWN	NA	NA
chr7	12925392	12925422	743[gene=ENSMUSG00000012848][PH=5][PH0=0.10][P=1.8e-04]	5	+	3	ENSMUSG00000012848	Rps5	CDS	protein_coding	KNOWN	NA	NA
chr7	12926657	12926687	765[gene=ENSMUSG00000012848][PH=5][PH0=0.10][P=1.8e-04]	5	+	3	ENSMUSG00000012848	Rps5	3'UTR	protein_coding	KNOWN	NA	NA
chr8	105530933	105530963	12051[gene=ENSMUSG00000013160][PH=4][PH0=0.01][P=1.0e-05]	4	-	4	ENSMUSG00000013160	Atp6v0d1	CDS	protein_coding	KNOWN	NA	NA
chr1	131848573	131848603	19002[gene=ENSMUSG00000013275][PH=5][PH0=0.21][P=9.9e-03]	5	+	2	ENSMUSG00000013275	Slc41a1	3'UTR	protein_coding	KNOWN	NA	NA
chr1	131847492	131847522	18978[gene=ENSMUSG00000013275][PH=5][PH0=0.21][P=9.9e-03]	5	+	2	ENSMUSG00000013275	Slc41a1	3'UTR	protein_coding	KNOWN	NA	NA
chr1	131846885	131846915	18957[gene=ENSMUSG00000013275][PH=8][PH0=0.21][P=4.2e-07]	8	+	4	ENSMUSG00000013275	Slc41a1	3'UTR	protein_coding	KNOWN	NA	NA
chr1	131848789	131848819	19035[gene=ENSMUSG00000013275][PH=54][PH0=0.21][P=9.2e-14]	54	+	5	ENSMUSG00000013275	Slc41a1	3'UTR	protein_coding	KNOWN	NA	NA
chr19	32673833	32673863	10632[gene=ENSMUSG00000013662][PH=6][PH0=0.10][P=1.1e-05]	6	-	4	ENSMUSG00000013662	Atad1	3'UTR	protein_coding	KNOWN	NA	NA
chr19	32672624	32672654	10580[gene=ENSMUSG00000013662][PH=18][PH0=0.10][P=2.9e-13]	18	-	5	ENSMUSG00000013662	Atad1	3'UTR	protein_coding	KNOWN	NA	NA
chr19	32674100	32674130	10658[gene=ENSMUSG00000013662][PH=6][PH0=0.10][P=1.1e-05]	6	-	4	ENSMUSG00000013662	Atad1	3'UTR	protein_coding	KNOWN	NA	NA
chr19	32695849	32695879	10724[gene=ENSMUSG00000013662][PH=8][PH0=0.10][P=2.8e-09]	8	-	5	ENSMUSG00000013662	Atad1	CDS	protein_coding	KNOWN	NA	NA
chr19	32672560	32672590	10565[gene=ENSMUSG00000013662][PH=5][PH0=0.10][P=5.5e-04]	5	-	3	ENSMUSG00000013662	Atad1	3'UTR	protein_coding	KNOWN	NA	NA
chr19	32811734	32811764	9907[gene=ENSMUSG00000013663][PH=7][PH0=0.06][P=1.1e-08]	7	+	3	ENSMUSG00000013663	Pten	CDS	protein_coding	KNOWN	NA	NA
chr19	32800039	32800069	9853[gene=ENSMUSG00000013663][PH=5][PH0=0.06][P=8.2e-05]	5	+	2	ENSMUSG00000013663	Pten	CDS	protein_coding	KNOWN	NA	NA
chr14	32191855	32191885	3333[gene=ENSMUSG00000013701][PH=25][PH0=0.10][P=1.0e-100]	25	-	5	ENSMUSG00000013701	Timm23	downstream 10K|intron	protein_coding	KNOWN	NA	NA
chr15	67105501	67105531	12523[gene=ENSMUSG00000013846][PH=9][PH0=0.09][P=6.4e-12]	9	-	4	ENSMUSG00000013846	St3gal1	3'UTR	protein_coding	KNOWN	NA	NA
chr15	67102896	67102926	12469[gene=ENSMUSG00000013846][PH=7][PH0=0.09][P=4.2e-08]	7	-	5	ENSMUSG00000013846	St3gal1	3'UTR	protein_coding	KNOWN	NA	NA
chr16	97792594	97792624	18416[gene=ENSMUSG00000014039][PH=6][PH0=0.02][P=6.6e-10]	6	-	3	ENSMUSG00000014039	Prdm15	3'UTR	protein_coding	KNOWN	NA	NA
chr16	32300643	32300673	6547[gene=ENSMUSG00000014074][PH=3][PH0=0.02][P=2.0e-03]	3	+	3	ENSMUSG00000014074	Rnf168	3'UTR	protein_coding	KNOWN	NA	NA
chr11	62894251	62894281	18404[gene=ENSMUSG00000014177][PH=7][PH0=0.02][P=1.9e-12]	7	+	3	ENSMUSG00000014177	Tvp23b	3'UTR|intron	protein_coding	KNOWN	NA	NA
chr11	62895057	62895087	18423[gene=ENSMUSG00000014177][PH=4][PH0=0.02][P=3.2e-05]	4	+	3	ENSMUSG00000014177	Tvp23b	3'UTR|intron	protein_coding	KNOWN	NA	NA
chr11	62895158	62895188	18431[gene=ENSMUSG00000014177][PH=5][PH0=0.02][P=1.6e-07]	5	+	2	ENSMUSG00000014177	Tvp23b	3'UTR|intron	protein_coding	KNOWN	NA	NA
chr11	100599246	100599276	31204[gene=ENSMUSG00000014195][PH=4][PH0=0.06][P=2.0e-03]	4	-	3	ENSMUSG00000014195	Dnajc7	CDS	protein_coding	KNOWN	NA	NA
chr11	100582833	100582863	31145[gene=ENSMUSG00000014195][PH=18][PH0=0.06][P=1.0e-100]	18	-	4	ENSMUSG00000014195	Dnajc7	3'UTR	protein_coding	KNOWN	NA	NA
chr1	160203431	160203461	34422[gene=ENSMUSG00000014226][PH=5][PH0=0.05][P=7.7e-06]	5	-	3	ENSMUSG00000014226	Cacybp	3'UTR	protein_coding	KNOWN	NA	NA
chr11	96049576	96049606	28593[gene=ENSMUSG00000014349][PH=5][PH0=0.09][P=1.3e-04]	5	-	2	ENSMUSG00000014349	Ube2z	3'UTR	protein_coding	KNOWN	NA	NA
chr11	96049686	96049716	28614[gene=ENSMUSG00000014349][PH=24][PH0=0.09][P=8.2e-14]	24	-	5	ENSMUSG00000014349	Ube2z	3'UTR	protein_coding	KNOWN	NA	NA
chr2	128853955	128853985	28710[gene=ENSMUSG00000014353][PH=6][PH0=0.04][P=8.0e-08]	6	+	3	ENSMUSG00000014353	Tmem87b	3'UTR	protein_coding	KNOWN	NA	NA
chr2	128853560	128853590	28697[gene=ENSMUSG00000014353][PH=4][PH0=0.04][P=7.9e-04]	4	+	3	ENSMUSG00000014353	Tmem87b	3'UTR	protein_coding	KNOWN	NA	NA
chr2	128851918	128851948	28686[gene=ENSMUSG00000014353][PH=5][PH0=0.04][P=8.9e-06]	5	+	4	ENSMUSG00000014353	Tmem87b	3'UTR	protein_coding	KNOWN	NA	NA
chr7	46760577	46760607	6978[gene=ENSMUSG00000014418][PH=4][PH0=0.02][P=3.1e-05]	4	-	4	ENSMUSG00000014418	Hps5	3'UTR	protein_coding	KNOWN	NA	NA
chr14	31700030	31700060	2781[gene=ENSMUSG00000014496][PH=5][PH0=0.07][P=1.7e-04]	5	-	2	ENSMUSG00000014496	Ankrd28	3'UTR	protein_coding	KNOWN	NA	NA
chr14	31778950	31778980	2964[gene=ENSMUSG00000014496][PH=6][PH0=0.07][P=2.3e-06]	6	-	4	ENSMUSG00000014496	Ankrd28	CDS	protein_coding	KNOWN	NA	NA
chr10	128393225	128393255	27726[gene=ENSMUSG00000014498][PH=25][PH0=0.07][P=1.0e-100]	25	+	5	ENSMUSG00000014498	Ankrd52	3'UTR|intron	protein_coding	KNOWN	NA	NA
chr10	128390774	128390804	27678[gene=ENSMUSG00000014498][PH=13][PH0=0.07][P=1.0e-100]	13	+	4	ENSMUSG00000014498	Ankrd52	3'UTR|intron	protein_coding	KNOWN	NA	NA
chr18	34336448	34336478	7830[gene=ENSMUSG00000014504][PH=3][PH0=0.03][P=6.0e-03]	3	+	2	ENSMUSG00000014504	Srp19	3'UTR	protein_coding	KNOWN	NA	NA
chr4	151792365	151792395	24990[gene=ENSMUSG00000014592][PH=6][PH0=0.01][P=1.1e-11]	6	-	4	ENSMUSG00000014592	Camta1	downstream 10K|intron	protein_coding	KNOWN	NA	NA
chr4	151048364	151048394	24864[gene=ENSMUSG00000014592][PH=3][PH0=0.01][P=2.6e-03]	3	-	2	ENSMUSG00000014592	Camta1	3'UTR|intron	protein_coding	KNOWN	NA	NA
chr4	151170277	151170307	24885[gene=ENSMUSG00000014592][PH=3][PH0=0.01][P=2.6e-03]	3	-	1	ENSMUSG00000014592	Camta1	intron	protein_coding	KNOWN	NA	NA
chr11	70644579	70644609	18991[gene=ENSMUSG00000014606][PH=3][PH0=0.03][P=3.9e-03]	3	-	2	ENSMUSG00000014606	Slc25a11	3'UTR	protein_coding	KNOWN	NA	NA
chr5	110171550	110171580	16658[gene=ENSMUSG00000014668][PH=7][PH0=0.05][P=8.7e-10]	7	+	4	ENSMUSG00000014668	Chfr	3'UTR	protein_coding	KNOWN	NA	NA
chr5	110171478	110171508	16641[gene=ENSMUSG00000014668][PH=13][PH0=0.05][P=1.4e-13]	13	+	4	ENSMUSG00000014668	Chfr	3'UTR	protein_coding	KNOWN	NA	NA
chr17	15517048	15517078	2735[gene=ENSMUSG00000014767][PH=4][PH0=0.02][P=4.3e-05]	4	+	3	ENSMUSG00000014767	Tbp	3'UTR	protein_coding	KNOWN	NA	NA
chr17	15517023	15517053	2732[gene=ENSMUSG00000014767][PH=5][PH0=0.02][P=2.4e-07]	5	+	4	ENSMUSG00000014767	Tbp	3'UTR	protein_coding	KNOWN	NA	NA
chr8	105305312	105305342	17996[gene=ENSMUSG00000014859][PH=9][PH0=0.06][P=5.2e-14]	9	+	5	ENSMUSG00000014859	E2f4	3'UTR	protein_coding	KNOWN	NA	NA
chr2	26920098	26920128	6488[gene=ENSMUSG00000014873][PH=9][PH0=0.06][P=8.1e-14]	9	+	4	ENSMUSG00000014873	Surf2	3'UTR	protein_coding	KNOWN	NA	NA
chr8	66890116	66890146	6802[gene=ENSMUSG00000014907][PH=17][PH0=0.12][P=1.0e-100]	17	+	5	ENSMUSG00000014907	Naf1	3'UTR	protein_coding	KNOWN	NA	NA
chr8	66889580	66889610	6725[gene=ENSMUSG00000014907][PH=25][PH0=0.12][P=1.0e-100]	25	+	4	ENSMUSG00000014907	Naf1	3'UTR	protein_coding	KNOWN	NA	NA
chr8	66889521	66889551	6706[gene=ENSMUSG00000014907][PH=6][PH0=0.12][P=2.9e-05]	6	+	4	ENSMUSG00000014907	Naf1	3'UTR	protein_coding	KNOWN	NA	NA
chr8	66890261	66890291	6826[gene=ENSMUSG00000014907][PH=10][PH0=0.12][P=2.3e-12]	10	+	4	ENSMUSG00000014907	Naf1	3'UTR	protein_coding	KNOWN	NA	NA
chr8	66890057	66890087	6782[gene=ENSMUSG00000014907][PH=5][PH0=0.12][P=1.1e-03]	5	+	3	ENSMUSG00000014907	Naf1	3'UTR	protein_coding	KNOWN	NA	NA
chr8	66889678	66889708	6756[gene=ENSMUSG00000014907][PH=8][PH0=0.12][P=1.1e-08]	8	+	4	ENSMUSG00000014907	Naf1	3'UTR	protein_coding	KNOWN	NA	NA
chr5	32624191	32624221	5635[gene=ENSMUSG00000014932][PH=3][PH0=0.01][P=1.5e-03]	3	+	2	ENSMUSG00000014932	Yes1	intron	protein_coding	KNOWN	NA	NA
chr5	32492338	32492368	5571[gene=ENSMUSG00000014956][PH=8][PH0=0.16][P=1.5e-07]	8	+	3	ENSMUSG00000014956	Ppp1cb	3'UTR|intron	protein_coding	KNOWN	NA	NA
chr5	32491228	32491258	5360[gene=ENSMUSG00000014956][PH=8][PH0=0.16][P=1.5e-07]	8	+	5	ENSMUSG00000014956	Ppp1cb	3'UTR|intron	protein_coding	KNOWN	NA	NA
chr5	32480721	32480751	5247[gene=ENSMUSG00000014956][PH=6][PH0=0.16][P=2.4e-04]	6	+	3	ENSMUSG00000014956	Ppp1cb	CDS	protein_coding	KNOWN	NA	NA
chr5	32492682	32492712	5600[gene=ENSMUSG00000014956][PH=5][PH0=0.16][P=7.2e-03]	5	+	4	ENSMUSG00000014956	Ppp1cb	3'UTR|intron	protein_coding	KNOWN	NA	NA
chr5	32491501	32491531	5421[gene=ENSMUSG00000014956][PH=13][PH0=0.16][P=4.0e-13]	13	+	5	ENSMUSG00000014956	Ppp1cb	3'UTR|intron	protein_coding	KNOWN	NA	NA
chr5	32492069	32492099	5520[gene=ENSMUSG00000014956][PH=29][PH0=0.16][P=4.0e-13]	29	+	4	ENSMUSG00000014956	Ppp1cb	3'UTR|intron	protein_coding	KNOWN	NA	NA
chr5	32483370	32483400	5271[gene=ENSMUSG00000014956][PH=15][PH0=0.16][P=4.0e-13]	15	+	4	ENSMUSG00000014956	Ppp1cb	CDS	protein_coding	KNOWN	NA	NA
chr5	32491264	32491294	5372[gene=ENSMUSG00000014956][PH=9][PH0=0.16][P=3.1e-09]	9	+	3	ENSMUSG00000014956	Ppp1cb	3'UTR|intron	protein_coding	KNOWN	NA	NA
chr5	32491832	32491862	5478[gene=ENSMUSG00000014956][PH=29][PH0=0.16][P=4.0e-13]	29	+	5	ENSMUSG00000014956	Ppp1cb	3'UTR|intron	protein_coding	KNOWN	NA	NA
chr5	32491366	32491396	5399[gene=ENSMUSG00000014956][PH=11][PH0=0.16][P=1.2e-12]	11	+	4	ENSMUSG00000014956	Ppp1cb	3'UTR|intron	protein_coding	KNOWN	NA	NA
chr5	32492211	32492241	5557[gene=ENSMUSG00000014956][PH=5][PH0=0.16][P=7.2e-03]	5	+	3	ENSMUSG00000014956	Ppp1cb	3'UTR|intron	protein_coding	KNOWN	NA	NA
chr5	32491676	32491706	5443[gene=ENSMUSG00000014956][PH=6][PH0=0.16][P=2.4e-04]	6	+	4	ENSMUSG00000014956	Ppp1cb	3'UTR|intron	protein_coding	KNOWN	NA	NA
chr5	32491104	32491134	5340[gene=ENSMUSG00000014956][PH=8][PH0=0.16][P=1.5e-07]	8	+	4	ENSMUSG00000014956	Ppp1cb	3'UTR	protein_coding	KNOWN	NA	NA
chr15	65872003	65872033	9395[gene=ENSMUSG00000015002][PH=5][PH0=0.03][P=4.4e-06]	5	+	3	ENSMUSG00000015002	Efr3a	3'UTR	protein_coding	KNOWN	NA	NA
chr15	65871537	65871567	9379[gene=ENSMUSG00000015002][PH=8][PH0=0.03][P=8.5e-13]	8	+	3	ENSMUSG00000015002	Efr3a	3'UTR	protein_coding	KNOWN	NA	NA
chr15	65872904	65872934	9414[gene=ENSMUSG00000015002][PH=4][PH0=0.03][P=5.2e-04]	4	+	3	ENSMUSG00000015002	Efr3a	3'UTR	protein_coding	KNOWN	NA	NA
chr12	80167723	80167753	8949[gene=ENSMUSG00000015143][PH=21][PH0=0.14][P=1.0e-100]	21	-	4	ENSMUSG00000015143	Actn1	3'UTR	protein_coding	KNOWN	NA	NA
chr12	80167612	80167642	8928[gene=ENSMUSG00000015143][PH=10][PH0=0.14][P=1.7e-11]	10	-	4	ENSMUSG00000015143	Actn1	3'UTR	protein_coding	KNOWN	NA	NA
chr12	80168002	80168032	9017[gene=ENSMUSG00000015143][PH=50][PH0=0.14][P=1.0e-100]	50	-	5	ENSMUSG00000015143	Actn1	3'UTR	protein_coding	KNOWN	NA	NA
chr12	80168149	80168179	9086[gene=ENSMUSG00000015143][PH=9][PH0=0.14][P=1.1e-09]	9	-	4	ENSMUSG00000015143	Actn1	3'UTR	protein_coding	KNOWN	NA	NA
chr7	28822042	28822072	3095[gene=ENSMUSG00000015165][PH=6][PH0=0.09][P=2.1e-06]	6	+	3	ENSMUSG00000015165	Hnrnpl	3'UTR	protein_coding	KNOWN	NA	NA
chr19	46084919	46084949	13740[gene=ENSMUSG00000015176][PH=5][PH0=0.05][P=5.2e-06]	5	+	3	ENSMUSG00000015176	Nolc1	3'UTR	protein_coding	KNOWN	NA	NA
chr6	4642371	4642401	375[gene=ENSMUSG00000015189][PH=4][PH0=0.04][P=5.0e-04]	4	+	2	ENSMUSG00000015189	Casd1	3'UTR	protein_coding	KNOWN	NA	NA
chr6	4643304	4643334	411[gene=ENSMUSG00000015189][PH=4][PH0=0.04][P=5.0e-04]	4	+	2	ENSMUSG00000015189	Casd1	3'UTR	protein_coding	KNOWN	NA	NA
chr6	4643031	4643061	388[gene=ENSMUSG00000015189][PH=6][PH0=0.04][P=3.8e-08]	6	+	3	ENSMUSG00000015189	Casd1	3'UTR	protein_coding	KNOWN	NA	NA
chr4	53021994	53022024	16426[gene=ENSMUSG00000015247][PH=23][PH0=0.08][P=1.0e-100]	23	+	5	ENSMUSG00000015247	Nipsnap3b	3'UTR	protein_coding	KNOWN	NA	NA
chrX	74369227	74369257	5561[gene=ENSMUSG00000015290][PH=6][PH0=0.03][P=2.8e-09]	6	-	3	ENSMUSG00000015290	Ubl4	3'UTR|intron	protein_coding	KNOWN	NA	NA
chrX	74311495	74311525	6200[gene=ENSMUSG00000015291][PH=3][PH0=0.02][P=3.2e-03]	3	+	2	ENSMUSG00000015291	Gdi1	3'UTR	protein_coding	KNOWN	NA	NA
chr10	80932147	80932177	17188[gene=ENSMUSG00000015312][PH=30][PH0=0.31][P=1.0e-100]	30	+	5	ENSMUSG00000015312	Gadd45b	3'UTR	protein_coding	KNOWN	NA	NA
chr10	80931735	80931765	17141[gene=ENSMUSG00000015312][PH=18][PH0=0.31][P=1.0e-100]	18	+	5	ENSMUSG00000015312	Gadd45b	3'UTR	protein_coding	KNOWN	NA	NA
chr1	171943794	171943824	29693[gene=ENSMUSG00000015314][PH=4][PH0=0.04][P=5.0e-04]	4	+	2	ENSMUSG00000015314	Slamf6	3'UTR	protein_coding	KNOWN	NA	NA
chr1	171943776	171943806	29689[gene=ENSMUSG00000015314][PH=4][PH0=0.04][P=5.0e-04]	4	+	2	ENSMUSG00000015314	Slamf6	3'UTR	protein_coding	KNOWN	NA	NA
chr1	171800184	171800214	29298[gene=ENSMUSG00000015316][PH=8][PH0=0.21][P=7.1e-07]	8	+	4	ENSMUSG00000015316	Slamf1	3'UTR	protein_coding	KNOWN	NA	NA
chr1	171801019	171801049	29354[gene=ENSMUSG00000015316][PH=6][PH0=0.21][P=6.7e-04]	6	+	4	ENSMUSG00000015316	Slamf1	3'UTR	protein_coding	KNOWN	NA	NA
chr1	171800539	171800569	29317[gene=ENSMUSG00000015316][PH=8][PH0=0.21][P=7.1e-07]	8	+	4	ENSMUSG00000015316	Slamf1	3'UTR	protein_coding	KNOWN	NA	NA
chr1	171801144	171801174	29368[gene=ENSMUSG00000015316][PH=11][PH0=0.21][P=9.2e-12]	11	+	3	ENSMUSG00000015316	Slamf1	3'UTR	protein_coding	KNOWN	NA	NA
chr2	30090956	30090986	7240[gene=ENSMUSG00000015335][PH=3][PH0=0.01][P=2.8e-04]	3	-	3	ENSMUSG00000015335	Zdhhc12	3'UTR	protein_coding	KNOWN	NA	NA
chr13	43802250	43802280	9730[gene=ENSMUSG00000015396][PH=4][PH0=0.07][P=2.9e-03]	4	+	2	ENSMUSG00000015396	Cd83	3'UTR	protein_coding	KNOWN	NA	NA
chr13	43802422	43802452	9749[gene=ENSMUSG00000015396][PH=6][PH0=0.07][P=7.5e-07]	6	+	2	ENSMUSG00000015396	Cd83	3'UTR	protein_coding	KNOWN	NA	NA
chr13	43802331	43802361	9739[gene=ENSMUSG00000015396][PH=4][PH0=0.07][P=2.9e-03]	4	+	2	ENSMUSG00000015396	Cd83	3'UTR	protein_coding	KNOWN	NA	NA
chr17	34655037	34655067	9571[gene=ENSMUSG00000033739][PH=23][PH0=0.10][P=3.4e-14]	23	+	5	ENSMUSG00000015461	Atf6b	3'UTR	protein_coding	KNOWN	NA	NA
chr17	34601130	34601160	8272[gene=ENSMUSG00000015478][PH=5][PH0=0.03][P=5.2e-07]	5	-	3	ENSMUSG00000015478	Rnf5	3'UTR	protein_coding	KNOWN	NA	NA
chr10	14150057	14150087	3350[gene=ENSMUSG00000015501][PH=7][PH0=0.20][P=6.4e-05]	7	+	5	ENSMUSG00000015501	Hivep2	3'UTR	protein_coding	KNOWN	NA	NA
chr10	14149894	14149924	3325[gene=ENSMUSG00000015501][PH=9][PH0=0.20][P=4.4e-08]	9	+	4	ENSMUSG00000015501	Hivep2	3'UTR	protein_coding	KNOWN	NA	NA
chr10	14150362	14150392	3461[gene=ENSMUSG00000015501][PH=14][PH0=0.20][P=1.0e-100]	14	+	3	ENSMUSG00000015501	Hivep2	3'UTR	protein_coding	KNOWN	NA	NA
chr10	13975862	13975892	1856[gene=ENSMUSG00000015501][PH=6][PH0=0.20][P=1.9e-03]	6	+	3	ENSMUSG00000015501	Hivep2	intron	protein_coding	KNOWN	NA	NA
chr10	14150468	14150498	3484[gene=ENSMUSG00000015501][PH=10][PH0=0.20][P=9.6e-10]	10	+	4	ENSMUSG00000015501	Hivep2	3'UTR	protein_coding	KNOWN	NA	NA
chr10	14150079	14150109	3354[gene=ENSMUSG00000015501][PH=7][PH0=0.20][P=6.4e-05]	7	+	4	ENSMUSG00000015501	Hivep2	3'UTR	protein_coding	KNOWN	NA	NA
chr10	14150606	14150636	3526[gene=ENSMUSG00000015501][PH=12][PH0=0.20][P=1.1e-16]	12	+	4	ENSMUSG00000015501	Hivep2	3'UTR	protein_coding	KNOWN	NA	NA
chr10	14150240	14150270	3403[gene=ENSMUSG00000015501][PH=37][PH0=0.20][P=1.0e-100]	37	+	4	ENSMUSG00000015501	Hivep2	3'UTR	protein_coding	KNOWN	NA	NA
chr3	95496953	95496983	18462[gene=ENSMUSG00000015522][PH=5][PH0=0.02][P=6.0e-07]	5	+	2	ENSMUSG00000015522	Arnt	3'UTR	protein_coding	KNOWN	NA	NA
chr3	95496976	95497006	18465[gene=ENSMUSG00000015522][PH=4][PH0=0.02][P=1.0e-04]	4	+	2	ENSMUSG00000015522	Arnt	3'UTR	protein_coding	KNOWN	NA	NA
chr17	26699352	26699382	6020[gene=ENSMUSG00000015575][PH=5][PH0=0.02][P=3.5e-07]	5	+	4	ENSMUSG00000015575	Atp6v0e	3'UTR	protein_coding	KNOWN	NA	NA
chr17	46404148	46404178	13557[gene=ENSMUSG00000015597][PH=9][PH0=0.02][P=1.0e-100]	9	+	4	ENSMUSG00000015597	Zfp318	intron	protein_coding	KNOWN	NA	NA
chr17	46548973	46549003	10709[gene=ENSMUSG00000015605][PH=18][PH0=0.12][P=1.1e-13]	18	-	5	ENSMUSG00000015605	Srf	3'UTR	protein_coding	KNOWN	NA	NA
chr17	46547749	46547779	10665[gene=ENSMUSG00000015605][PH=10][PH0=0.12][P=9.6e-13]	10	-	4	ENSMUSG00000015605	Srf	3'UTR	protein_coding	KNOWN	NA	NA
chr17	46548349	46548379	10683[gene=ENSMUSG00000015605][PH=8][PH0=0.12][P=4.1e-09]	8	-	4	ENSMUSG00000015605	Srf	3'UTR	protein_coding	KNOWN	NA	NA
chr17	46554847	46554877	10734[gene=ENSMUSG00000023972][PH=2][PH0=0.00][P=8.0e-03]	2	-	2	ENSMUSG00000015605	Srf	downstream 10K|intron	protein_coding	KNOWN	NA	NA
chr17	46547671	46547701	10651[gene=ENSMUSG00000015605][PH=6][PH0=0.12][P=1.2e-05]	6	-	3	ENSMUSG00000015605	Srf	3'UTR	protein_coding	KNOWN	NA	NA
chr2	9858027	9858057	1564[gene=ENSMUSG00000015619][PH=31][PH0=0.14][P=1.3e-13]	31	-	5	ENSMUSG00000015619	Gata3	3'UTR	protein_coding	KNOWN	NA	NA
chr2	9857399	9857429	1477[gene=ENSMUSG00000015619][PH=11][PH0=0.14][P=1.3e-13]	11	-	3	ENSMUSG00000015619	Gata3	3'UTR	protein_coding	KNOWN	NA	NA
chr2	9857309	9857339	1458[gene=ENSMUSG00000015619][PH=10][PH0=0.14][P=6.1e-12]	10	-	4	ENSMUSG00000015619	Gata3	3'UTR	protein_coding	KNOWN	NA	NA
chr2	9857086	9857116	1423[gene=ENSMUSG00000015619][PH=9][PH0=0.14][P=3.9e-10]	9	-	3	ENSMUSG00000015619	Gata3	3'UTR	protein_coding	KNOWN	NA	NA
chr2	9857245	9857275	1443[gene=ENSMUSG00000015619][PH=10][PH0=0.14][P=6.1e-12]	10	-	4	ENSMUSG00000015619	Gata3	3'UTR	protein_coding	KNOWN	NA	NA
chr9	40804788	40804818	9870[gene=ENSMUSG00000015656][PH=171][PH0=1.00][P=1.0e-100]	171	+	5	ENSMUSG00000015656	Hspa8	intron	protein_coding	KNOWN	NA	NA
chr9	40804025	40804055	9797[gene=ENSMUSG00000015656][PH=89][PH0=1.00][P=1.0e-100]	89	+	5	ENSMUSG00000015656	Hspa8	intron	protein_coding	KNOWN	NA	NA
chr9	40803617	40803647	9742[gene=ENSMUSG00000015656][PH=74][PH0=1.00][P=1.0e-100]	74	+	4	ENSMUSG00000015656	Hspa8	intron	protein_coding	KNOWN	NA	NA
chr3	95323534	95323564	9523[gene=ENSMUSG00000015697][PH=14][PH0=0.03][P=1.3e-13]	14	-	4	ENSMUSG00000015697	Setdb1	3'UTR	protein_coding	KNOWN	NA	NA
chr3	95323432	95323462	18373[gene=ENSMUSG00000015714][PH=5][PH0=0.04][P=1.6e-06]	5	+	3	ENSMUSG00000015714	Cers2	3'UTR	protein_coding	KNOWN	NA	NA
chr6	17666221	17666251	1905[gene=ENSMUSG00000015733][PH=13][PH0=0.10][P=1.0e-100]	13	+	4	ENSMUSG00000015733	Capza2	3'UTR	protein_coding	KNOWN	NA	NA
chr6	17666682	17666712	1951[gene=ENSMUSG00000015733][PH=10][PH0=0.10][P=2.4e-13]	10	+	4	ENSMUSG00000015733	Capza2	3'UTR	protein_coding	KNOWN	NA	NA
chr3	95945322	95945352	19090[gene=ENSMUSG00000015749][PH=5][PH0=0.19][P=5.4e-03]	5	+	3	ENSMUSG00000015749	Anp32e	3'UTR	protein_coding	KNOWN	NA	NA
chr3	95946310	95946340	19184[gene=ENSMUSG00000015749][PH=11][PH0=0.19][P=1.6e-12]	11	+	5	ENSMUSG00000015749	Anp32e	3'UTR	protein_coding	KNOWN	NA	NA
chr3	95945527	95945557	19109[gene=ENSMUSG00000015749][PH=5][PH0=0.19][P=5.4e-03]	5	+	3	ENSMUSG00000015749	Anp32e	3'UTR	protein_coding	KNOWN	NA	NA
chr3	95947339	95947369	19266[gene=ENSMUSG00000015749][PH=5][PH0=0.19][P=5.4e-03]	5	+	3	ENSMUSG00000015749	Anp32e	3'UTR	protein_coding	KNOWN	NA	NA
chr3	95945617	95945647	19133[gene=ENSMUSG00000015749][PH=37][PH0=0.19][P=8.3e-14]	37	+	5	ENSMUSG00000015749	Anp32e	3'UTR	protein_coding	KNOWN	NA	NA
chr3	95946423	95946453	19211[gene=ENSMUSG00000015749][PH=5][PH0=0.19][P=5.4e-03]	5	+	3	ENSMUSG00000015749	Anp32e	3'UTR	protein_coding	KNOWN	NA	NA
chr3	95945504	95945534	19105[gene=ENSMUSG00000015749][PH=5][PH0=0.19][P=5.4e-03]	5	+	4	ENSMUSG00000015749	Anp32e	3'UTR	protein_coding	KNOWN	NA	NA
chr10	7905665	7905695	1009[gene=ENSMUSG00000015755][PH=8][PH0=0.08][P=7.7e-10]	8	-	2	ENSMUSG00000015755	Tab2	3'UTR	protein_coding	KNOWN	NA	NA
chr10	7906256	7906286	1031[gene=ENSMUSG00000015755][PH=6][PH0=0.08][P=4.5e-06]	6	-	3	ENSMUSG00000015755	Tab2	3'UTR	protein_coding	KNOWN	NA	NA
chr10	7822524	7822554	1181[gene=ENSMUSG00000015757][PH=9][PH0=0.05][P=1.2e-13]	9	+	5	ENSMUSG00000015757	Ppil4	3'UTR	protein_coding	KNOWN	NA	NA
chr5	45525547	45525577	7406[gene=ENSMUSG00000015804][PH=8][PH0=0.13][P=5.8e-09]	8	+	4	ENSMUSG00000015804	Med28	3'UTR	protein_coding	KNOWN	NA	NA
chr5	45525469	45525499	7377[gene=ENSMUSG00000015804][PH=44][PH0=0.13][P=5.6e-14]	44	+	5	ENSMUSG00000015804	Med28	3'UTR	protein_coding	KNOWN	NA	NA
chr11	50200421	50200451	12299[gene=ENSMUSG00000015837][PH=4][PH0=0.06][P=1.0e-03]	4	-	3	ENSMUSG00000015837	Sqstm1	3'UTR	protein_coding	KNOWN	NA	NA
chr2	75675550	75675580	18431[gene=ENSMUSG00000015839][PH=5][PH0=0.06][P=2.6e-05]	5	-	3	ENSMUSG00000015839	Nfe2l2	3'UTR	protein_coding	KNOWN	NA	NA
chr2	75675654	75675684	18443[gene=ENSMUSG00000015839][PH=8][PH0=0.06][P=2.4e-11]	8	-	4	ENSMUSG00000015839	Nfe2l2	3'UTR	protein_coding	KNOWN	NA	NA
chr5	45732728	45732758	6264[gene=ENSMUSG00000015882][PH=6][PH0=0.03][P=4.3e-08]	6	-	2	ENSMUSG00000015882	Lcorl	3'UTR|intron	protein_coding	KNOWN	NA	NA
chr13	56073710	56073740	10312[gene=ENSMUSG00000015937][PH=6][PH0=0.05][P=2.2e-07]	6	-	4	ENSMUSG00000015937	H2afy	3'UTR	protein_coding	KNOWN	NA	NA
chr13	56084793	56084823	10349[gene=ENSMUSG00000015937][PH=4][PH0=0.05][P=1.8e-03]	4	-	3	ENSMUSG00000015937	H2afy	intron	protein_coding	KNOWN	NA	NA
chr5	134221332	134221362	22471[gene=ENSMUSG00000015950][PH=3][PH0=0.03][P=7.3e-03]	3	-	2	ENSMUSG00000015950	Ncf1	3'UTR|intron	protein_coding	KNOWN	NA	NA
chr1	177763600	177763630	40374[gene=ENSMUSG00000015961][PH=12][PH0=0.12][P=1.3e-13]	12	-	4	ENSMUSG00000015961	Adss	3'UTR	protein_coding	KNOWN	NA	NA
chr1	177785025	177785055	40507[gene=ENSMUSG00000015961][PH=6][PH0=0.12][P=2.6e-05]	6	-	4	ENSMUSG00000015961	Adss	intron	protein_coding	KNOWN	NA	NA
chr14	29993169	29993199	6409[gene=ENSMUSG00000015971][PH=4][PH0=0.02][P=8.3e-06]	4	+	2	ENSMUSG00000015971	Actr8	3'UTR	protein_coding	KNOWN	NA	NA
chr13	112867830	112867860	21881[gene=ENSMUSG00000016018][PH=12][PH0=0.04][P=1.0e-100]	12	-	5	ENSMUSG00000016018	Skiv2l2	3'UTR	protein_coding	KNOWN	NA	NA
chr9	32518786	32518816	2915[gene=ENSMUSG00000016087][PH=4][PH0=0.04][P=1.2e-03]	4	-	2	ENSMUSG00000016087	Fli1	intron	protein_coding	KNOWN	NA	NA
chr9	32422554	32422584	2740[gene=ENSMUSG00000016087][PH=4][PH0=0.04][P=1.2e-03]	4	-	3	ENSMUSG00000016087	Fli1	3'UTR	protein_coding	KNOWN	NA	NA
chr17	37274403	37274433	10669[gene=ENSMUSG00000016206][PH=14][PH0=0.05][P=1.0e-100]	14	+	4	ENSMUSG00000016206	H2-M3	3'UTR	protein_coding	KNOWN	NA	NA
chr2	174465326	174465356	35967[gene=ENSMUSG00000016257][PH=30][PH0=0.13][P=5.3e-14]	30	-	5	ENSMUSG00000016257	Slmo2	3'UTR	protein_coding	KNOWN	NA	NA
chrX	36883214	36883244	2746[gene=ENSMUSG00000016308][PH=5][PH0=0.06][P=1.2e-05]	5	+	2	ENSMUSG00000016308	Ube2a	3'UTR	protein_coding	KNOWN	NA	NA
chrX	36883458	36883488	2754[gene=ENSMUSG00000016308][PH=4][PH0=0.06][P=8.6e-04]	4	+	4	ENSMUSG00000016308	Ube2a	3'UTR	protein_coding	KNOWN	NA	NA
chrX	36884153	36884183	2768[gene=ENSMUSG00000016308][PH=5][PH0=0.06][P=1.2e-05]	5	+	4	ENSMUSG00000016308	Ube2a	3'UTR	protein_coding	KNOWN	NA	NA
chrX	37149388	37149418	2815[gene=ENSMUSG00000016409][PH=4][PH0=0.04][P=3.3e-04]	4	+	3	ENSMUSG00000016409	Nkap	3'UTR	protein_coding	KNOWN	NA	NA
chrX	37148323	37148353	2788[gene=ENSMUSG00000016409][PH=6][PH0=0.04][P=2.5e-08]	6	+	4	ENSMUSG00000016409	Nkap	3'UTR	protein_coding	KNOWN	NA	NA
chr13	29907604	29907634	3830[gene=ENSMUSG00000016477][PH=7][PH0=0.03][P=2.7e-11]	7	-	4	ENSMUSG00000016477	E2f3	3'UTR	protein_coding	KNOWN	NA	NA
chr19	29360844	29360874	9727[gene=ENSMUSG00000016495][PH=3][PH0=0.03][P=6.6e-03]	3	-	2	ENSMUSG00000016495	Plgrkt	5'UTR	protein_coding	KNOWN	NA	NA
chr19	29385749	29385779	8588[gene=ENSMUSG00000016496][PH=23][PH0=0.53][P=1.8e-13]	23	+	5	ENSMUSG00000016496	Cd274	3'UTR	protein_coding	KNOWN	NA	NA
chr19	29387257	29387287	8766[gene=ENSMUSG00000016496][PH=7][PH0=0.53][P=7.0e-03]	7	+	4	ENSMUSG00000016496	Cd274	3'UTR	protein_coding	KNOWN	NA	NA
chr19	29387205	29387235	8742[gene=ENSMUSG00000016496][PH=49][PH0=0.53][P=1.8e-13]	49	+	5	ENSMUSG00000016496	Cd274	3'UTR	protein_coding	KNOWN	NA	NA
chr19	29386947	29386977	8697[gene=ENSMUSG00000016496][PH=20][PH0=0.53][P=1.8e-13]	20	+	3	ENSMUSG00000016496	Cd274	3'UTR	protein_coding	KNOWN	NA	NA
chr19	29387944	29387974	8840[gene=ENSMUSG00000016496][PH=44][PH0=0.53][P=1.8e-13]	44	+	5	ENSMUSG00000016496	Cd274	3'UTR	protein_coding	KNOWN	NA	NA
chr19	29386176	29386206	8629[gene=ENSMUSG00000016496][PH=10][PH0=0.53][P=2.1e-06]	10	+	3	ENSMUSG00000016496	Cd274	3'UTR	protein_coding	KNOWN	NA	NA
chr19	29380357	29380387	8498[gene=ENSMUSG00000016496][PH=8][PH0=0.53][P=5.4e-04]	8	+	3	ENSMUSG00000016496	Cd274	CDS	protein_coding	KNOWN	NA	NA
chr19	29386461	29386491	8660[gene=ENSMUSG00000016496][PH=13][PH0=0.53][P=2.4e-10]	13	+	5	ENSMUSG00000016496	Cd274	3'UTR	protein_coding	KNOWN	NA	NA
chr19	29470932	29470962	8967[gene=ENSMUSG00000016498][PH=4][PH0=0.04][P=5.0e-04]	4	+	3	ENSMUSG00000016498	Pdcd1lg2	3'UTR	protein_coding	KNOWN	NA	NA
chr19	29470951	29470981	8969[gene=ENSMUSG00000016498][PH=4][PH0=0.04][P=5.0e-04]	4	+	3	ENSMUSG00000016498	Pdcd1lg2	3'UTR	protein_coding	KNOWN	NA	NA
chr19	29471138	29471168	8985[gene=ENSMUSG00000016498][PH=6][PH0=0.04][P=3.2e-08]	6	+	3	ENSMUSG00000016498	Pdcd1lg2	3'UTR	protein_coding	KNOWN	NA	NA
chr5	147017768	147017798	26546[gene=ENSMUSG00000016520][PH=14][PH0=0.06][P=2.1e-13]	14	-	3	ENSMUSG00000016520	Lnx2	3'UTR	protein_coding	KNOWN	NA	NA
chr5	147018202	147018232	26576[gene=ENSMUSG00000016520][PH=7][PH0=0.06][P=4.0e-09]	7	-	4	ENSMUSG00000016520	Lnx2	3'UTR	protein_coding	KNOWN	NA	NA
chr1	131023944	131023974	18717[gene=ENSMUSG00000016529][PH=4][PH0=0.03][P=7.1e-05]	4	+	3	ENSMUSG00000016529	Il10	intron	protein_coding	KNOWN	NA	NA
chrX	38419959	38419989	2205[gene=ENSMUSG00000016534][PH=4][PH0=0.03][P=2.5e-04]	4	-	3	ENSMUSG00000016534	Lamp2	3'UTR|intron	protein_coding	KNOWN	NA	NA
chr15	77959979	77960009	15800[gene=ENSMUSG00000016554][PH=3][PH0=0.03][P=4.9e-03]	3	-	2	ENSMUSG00000016554	Eif3d	CDS	protein_coding	KNOWN	NA	NA
chr11	116022632	116022662	40868[gene=ENSMUSG00000016559][PH=43][PH0=0.24][P=1.0e-100]	43	-	5	ENSMUSG00000016559	H3f3b	3'UTR	protein_coding	KNOWN	NA	NA
chr11	116022843	116022873	40905[gene=ENSMUSG00000016559][PH=8][PH0=0.24][P=6.0e-07]	8	-	4	ENSMUSG00000016559	H3f3b	3'UTR	protein_coding	KNOWN	NA	NA
chr11	116022516	116022546	40829[gene=ENSMUSG00000016559][PH=11][PH0=0.24][P=1.1e-11]	11	-	5	ENSMUSG00000016559	H3f3b	3'UTR	protein_coding	KNOWN	NA	NA
chr15	84935097	84935127	13230[gene=ENSMUSG00000016619][PH=5][PH0=0.03][P=1.0e-06]	5	+	4	ENSMUSG00000016619	Nup50	CDS	protein_coding	KNOWN	NA	NA
chr15	84940791	84940821	13248[gene=ENSMUSG00000016619][PH=4][PH0=0.03][P=1.3e-04]	4	+	4	ENSMUSG00000016619	Nup50	3'UTR	protein_coding	KNOWN	NA	NA
chr13	24477175	24477205	4968[gene=ENSMUSG00000016756][PH=4][PH0=0.01][P=2.0e-05]	4	+	2	ENSMUSG00000016756	Cmah	3'UTR	protein_coding	KNOWN	NA	NA
chr14	52294878	52294908	10203[gene=ENSMUSG00000016831][PH=6][PH0=0.05][P=6.2e-08]	6	+	3	ENSMUSG00000016831	Tox4	3'UTR	protein_coding	KNOWN	NA	NA
chr2	162935103	162935133	36725[gene=ENSMUSG00000016921][PH=19][PH0=0.31][P=1.0e-100]	19	+	5	ENSMUSG00000016921	Srsf6	3'UTR	protein_coding	KNOWN	NA	NA
chr2	162934983	162935013	36708[gene=ENSMUSG00000016921][PH=6][PH0=0.31][P=1.9e-03]	6	+	2	ENSMUSG00000016921	Srsf6	3'UTR	protein_coding	KNOWN	NA	NA
chr2	162934890	162934920	36697[gene=ENSMUSG00000016921][PH=6][PH0=0.31][P=1.9e-03]	6	+	3	ENSMUSG00000016921	Srsf6	3'UTR	protein_coding	KNOWN	NA	NA
chr2	162935197	162935227	36757[gene=ENSMUSG00000016921][PH=6][PH0=0.31][P=1.9e-03]	6	+	3	ENSMUSG00000016921	Srsf6	3'UTR	protein_coding	KNOWN	NA	NA
chr2	160732641	160732671	36464[gene=ENSMUSG00000016933][PH=4][PH0=0.05][P=1.1e-03]	4	+	1	ENSMUSG00000016933	Plcg1	downstream 10K|intron	protein_coding	KNOWN	NA	NA
chr17	24047739	24047769	2800[gene=ENSMUSG00000016946][PH=6][PH0=0.04][P=1.9e-08]	6	-	3	ENSMUSG00000016946	Kctd5	3'UTR	protein_coding	KNOWN	NA	NA
chr17	24047846	24047876	2815[gene=ENSMUSG00000016946][PH=7][PH0=0.04][P=1.2e-10]	7	-	3	ENSMUSG00000016946	Kctd5	3'UTR	protein_coding	KNOWN	NA	NA
chr11	17940071	17940101	3363[gene=ENSMUSG00000016984][PH=7][PH0=0.03][P=2.8e-11]	7	-	4	ENSMUSG00000016984	Etaa1	3'UTR	protein_coding	KNOWN	NA	NA
chr2	164425179	164425209	34093[gene=ENSMUSG00000017009][PH=3][PH0=0.01][P=4.1e-04]	3	-	3	ENSMUSG00000017009	Sdc4	3'UTR	protein_coding	KNOWN	NA	NA
chr11	101581846	101581876	33307[gene=ENSMUSG00000017119][PH=9][PH0=0.04][P=1.2e-13]	9	+	5	ENSMUSG00000017119	Nbr1	3'UTR	protein_coding	KNOWN	NA	NA
chr11	118164299	118164329	41696[gene=ENSMUSG00000017132][PH=6][PH0=0.05][P=6.5e-07]	6	-	2	ENSMUSG00000017132	Cyth1	3'UTR|intron	protein_coding	KNOWN	NA	NA
chr11	118164269	118164299	41694[gene=ENSMUSG00000017132][PH=4][PH0=0.05][P=4.4e-03]	4	-	1	ENSMUSG00000017132	Cyth1	3'UTR|intron	protein_coding	KNOWN	NA	NA
chr11	118164201	118164231	41681[gene=ENSMUSG00000017132][PH=12][PH0=0.05][P=1.0e-100]	12	-	5	ENSMUSG00000017132	Cyth1	3'UTR|intron	protein_coding	KNOWN	NA	NA
chr11	98704635	98704665	30287[gene=ENSMUSG00000017210][PH=3][PH0=0.01][P=5.8e-04]	3	-	1	ENSMUSG00000017210	Med24	3'UTR	protein_coding	KNOWN	NA	NA
chr11	77530099	77530129	20828[gene=ENSMUSG00000017291][PH=6][PH0=0.09][P=8.3e-06]	6	-	4	ENSMUSG00000017291	Taok1	3'UTR	protein_coding	KNOWN	NA	NA
chr11	77565785	77565815	21078[gene=ENSMUSG00000017291][PH=5][PH0=0.09][P=4.7e-04]	5	-	3	ENSMUSG00000017291	Taok1	CDS	protein_coding	KNOWN	NA	NA
chr11	77530041	77530071	20817[gene=ENSMUSG00000017291][PH=6][PH0=0.09][P=8.3e-06]	6	-	3	ENSMUSG00000017291	Taok1	3'UTR	protein_coding	KNOWN	NA	NA
chr11	77530491	77530521	20843[gene=ENSMUSG00000017291][PH=5][PH0=0.09][P=4.7e-04]	5	-	4	ENSMUSG00000017291	Taok1	3'UTR	protein_coding	KNOWN	NA	NA
chr11	77537321	77537351	20983[gene=ENSMUSG00000017291][PH=7][PH0=0.09][P=1.2e-07]	7	-	4	ENSMUSG00000017291	Taok1	3'UTR	protein_coding	KNOWN	NA	NA
chr11	77530690	77530720	20854[gene=ENSMUSG00000017291][PH=5][PH0=0.09][P=4.7e-04]	5	-	4	ENSMUSG00000017291	Taok1	3'UTR	protein_coding	KNOWN	NA	NA
chr11	78568172	78568202	21646[gene=ENSMUSG00000017376][PH=4][PH0=0.06][P=7.7e-03]	4	-	3	ENSMUSG00000017376	Nlk	3'UTR|intron	protein_coding	KNOWN	NA	NA
chr11	78567856	78567886	21637[gene=ENSMUSG00000017376][PH=5][PH0=0.06][P=1.2e-04]	5	-	2	ENSMUSG00000017376	Nlk	3'UTR|intron	protein_coding	KNOWN	NA	NA
chr11	78159433	78159463	21243[gene=ENSMUSG00000017386][PH=5][PH0=0.04][P=1.8e-06]	5	-	2	ENSMUSG00000017386	Traf4	3'UTR	protein_coding	KNOWN	NA	NA
chr2	15078627	15078657	4134[gene=ENSMUSG00000017418][PH=7][PH0=0.35][P=7.1e-04]	7	+	3	ENSMUSG00000017418	Arl5b	3'UTR	protein_coding	KNOWN	NA	NA
chr2	15076716	15076746	3988[gene=ENSMUSG00000017418][PH=18][PH0=0.35][P=1.0e-100]	18	+	5	ENSMUSG00000017418	Arl5b	3'UTR	protein_coding	KNOWN	NA	NA
chr2	15076977	15077007	4030[gene=ENSMUSG00000017418][PH=16][PH0=0.35][P=1.0e-100]	16	+	5	ENSMUSG00000017418	Arl5b	3'UTR	protein_coding	KNOWN	NA	NA
chr2	15079147	15079177	4166[gene=ENSMUSG00000017418][PH=9][PH0=0.35][P=1.6e-06]	9	+	4	ENSMUSG00000017418	Arl5b	3'UTR	protein_coding	KNOWN	NA	NA
chr2	15081076	15081106	4257[gene=ENSMUSG00000017418][PH=8][PH0=0.35][P=3.6e-05]	8	+	4	ENSMUSG00000017418	Arl5b	3'UTR	protein_coding	KNOWN	NA	NA
chr2	15076393	15076423	3923[gene=ENSMUSG00000017418][PH=121][PH0=0.35][P=1.0e-100]	121	+	5	ENSMUSG00000017418	Arl5b	3'UTR	protein_coding	KNOWN	NA	NA
chr2	15080817	15080847	4240[gene=ENSMUSG00000017418][PH=7][PH0=0.35][P=7.1e-04]	7	+	2	ENSMUSG00000017418	Arl5b	3'UTR	protein_coding	KNOWN	NA	NA
chr2	15079132	15079162	4163[gene=ENSMUSG00000017418][PH=7][PH0=0.35][P=7.1e-04]	7	+	4	ENSMUSG00000017418	Arl5b	3'UTR	protein_coding	KNOWN	NA	NA
chr11	80396026	80396056	25301[gene=ENSMUSG00000017421][PH=5][PH0=0.15][P=2.5e-03]	5	+	3	ENSMUSG00000017421	Zfp207	3'UTR|intron	protein_coding	KNOWN	NA	NA
chr14	16398626	16398656	1341[gene=ENSMUSG00000017485][PH=5][PH0=0.07][P=1.1e-04]	5	+	5	ENSMUSG00000017485	Top2b	CDS	protein_coding	KNOWN	NA	NA
chr14	16416638	16416668	1439[gene=ENSMUSG00000017485][PH=4][PH0=0.07][P=6.5e-03]	4	+	4	ENSMUSG00000017485	Top2b	3'UTR|CDS	protein_coding	KNOWN	NA	NA
chr14	16413720	16413750	1424[gene=ENSMUSG00000017485][PH=4][PH0=0.07][P=6.5e-03]	4	+	2	ENSMUSG00000017485	Top2b	CDS|intron	protein_coding	KNOWN	NA	NA
chr14	16398935	16398965	1352[gene=ENSMUSG00000017485][PH=7][PH0=0.07][P=1.7e-08]	7	+	5	ENSMUSG00000017485	Top2b	CDS	protein_coding	KNOWN	NA	NA
chr14	16387283	16387313	1291[gene=ENSMUSG00000017485][PH=8][PH0=0.07][P=1.7e-10]	8	+	5	ENSMUSG00000017485	Top2b	CDS	protein_coding	KNOWN	NA	NA
chr14	16413655	16413685	1402[gene=ENSMUSG00000017485][PH=24][PH0=0.07][P=2.2e-13]	24	+	4	ENSMUSG00000017485	Top2b	CDS|intron	protein_coding	KNOWN	NA	NA
chr11	80031983	80032013	24909[gene=ENSMUSG00000017548][PH=12][PH0=0.11][P=1.5e-13]	12	+	4	ENSMUSG00000017548	Suz12	3'UTR|CDS	protein_coding	KNOWN	NA	NA
chr11	80033906	80033936	24980[gene=ENSMUSG00000017548][PH=14][PH0=0.11][P=1.5e-13]	14	+	5	ENSMUSG00000017548	Suz12	3'UTR	protein_coding	KNOWN	NA	NA
chr11	80046737	80046767	22833[gene=ENSMUSG00000017561][PH=29][PH0=0.15][P=1.0e-100]	29	-	4	ENSMUSG00000017561	Crlf3	3'UTR	protein_coding	KNOWN	NA	NA
chr11	80046670	80046700	22807[gene=ENSMUSG00000017561][PH=12][PH0=0.15][P=1.0e-100]	12	-	4	ENSMUSG00000017561	Crlf3	3'UTR	protein_coding	KNOWN	NA	NA
chr11	80046529	80046559	22773[gene=ENSMUSG00000017561][PH=15][PH0=0.15][P=1.0e-100]	15	-	4	ENSMUSG00000017561	Crlf3	3'UTR	protein_coding	KNOWN	NA	NA
chr11	76418809	76418839	20512[gene=ENSMUSG00000017631][PH=4][PH0=0.01][P=7.2e-07]	4	-	2	ENSMUSG00000017631	Abr	3'UTR	protein_coding	KNOWN	NA	NA
chr11	76416792	76416822	20496[gene=ENSMUSG00000017631][PH=3][PH0=0.01][P=4.1e-04]	3	-	2	ENSMUSG00000017631	Abr	3'UTR	protein_coding	KNOWN	NA	NA
chr11	76417077	76417107	20505[gene=ENSMUSG00000017631][PH=3][PH0=0.01][P=4.1e-04]	3	-	2	ENSMUSG00000017631	Abr	3'UTR	protein_coding	KNOWN	NA	NA
chr11	79697386	79697416	24723[gene=ENSMUSG00000017639][PH=4][PH0=0.01][P=1.7e-05]	4	+	2	ENSMUSG00000017639	Rab11fip4	3'UTR	protein_coding	KNOWN	NA	NA
chr2	165289274	165289304	34278[gene=ENSMUSG00000017670][PH=3][PH0=0.02][P=3.6e-03]	3	-	3	ENSMUSG00000017670	Elmo2	3'UTR	protein_coding	KNOWN	NA	NA
chr11	79239874	79239904	22437[gene=ENSMUSG00000017677][PH=11][PH0=0.27][P=7.7e-11]	11	-	4	ENSMUSG00000017677	Wsb1	3'UTR	protein_coding	KNOWN	NA	NA
chr11	79240118	79240148	22498[gene=ENSMUSG00000017677][PH=46][PH0=0.27][P=1.0e-100]	46	-	4	ENSMUSG00000017677	Wsb1	3'UTR	protein_coding	KNOWN	NA	NA
chr11	79239428	79239458	22375[gene=ENSMUSG00000017677][PH=8][PH0=0.27][P=2.8e-06]	8	-	4	ENSMUSG00000017677	Wsb1	3'UTR	protein_coding	KNOWN	NA	NA
chr11	79239383	79239413	22358[gene=ENSMUSG00000017677][PH=21][PH0=0.27][P=1.0e-100]	21	-	5	ENSMUSG00000017677	Wsb1	3'UTR	protein_coding	KNOWN	NA	NA
chr11	79239510	79239540	22396[gene=ENSMUSG00000017677][PH=16][PH0=0.27][P=1.0e-100]	16	-	5	ENSMUSG00000017677	Wsb1	3'UTR	protein_coding	KNOWN	NA	NA
chr11	80266551	80266581	25144[gene=ENSMUSG00000017686][PH=5][PH0=0.04][P=1.3e-05]	5	+	2	ENSMUSG00000017686	Rhot1	3'UTR	protein_coding	KNOWN	NA	NA
chr11	80265954	80265984	25114[gene=ENSMUSG00000017686][PH=14][PH0=0.04][P=1.0e-100]	14	+	4	ENSMUSG00000017686	Rhot1	3'UTR	protein_coding	KNOWN	NA	NA
chr11	80246011	80246041	25068[gene=ENSMUSG00000017686][PH=5][PH0=0.04][P=1.3e-05]	5	+	3	ENSMUSG00000017686	Rhot1	CDS	protein_coding	KNOWN	NA	NA
chr11	80242053	80242083	25053[gene=ENSMUSG00000017686][PH=4][PH0=0.04][P=1.2e-03]	4	+	2	ENSMUSG00000017686	Rhot1	CDS	protein_coding	KNOWN	NA	NA
chr2	163624932	163624962	33882[gene=ENSMUSG00000017707][PH=5][PH0=0.09][P=1.9e-04]	5	-	3	ENSMUSG00000017707	Serinc3	3'UTR	protein_coding	KNOWN	NA	NA
chr2	163624679	163624709	33853[gene=ENSMUSG00000017707][PH=7][PH0=0.09][P=5.1e-08]	7	-	3	ENSMUSG00000017707	Serinc3	3'UTR	protein_coding	KNOWN	NA	NA
chr2	163624852	163624882	33869[gene=ENSMUSG00000017707][PH=10][PH0=0.09][P=1.1e-16]	10	-	4	ENSMUSG00000017707	Serinc3	3'UTR	protein_coding	KNOWN	NA	NA
chr2	163625016	163625046	33897[gene=ENSMUSG00000017707][PH=10][PH0=0.09][P=1.1e-16]	10	-	4	ENSMUSG00000017707	Serinc3	3'UTR	protein_coding	KNOWN	NA	NA
chr2	163626445	163626475	33920[gene=ENSMUSG00000017707][PH=7][PH0=0.09][P=5.1e-08]	7	-	4	ENSMUSG00000017707	Serinc3	CDS	protein_coding	KNOWN	NA	NA
chr11	118023897	118023927	36644[gene=ENSMUSG00000017715][PH=11][PH0=0.05][P=1.4e-13]	11	+	4	ENSMUSG00000017715	Pgs1	3'UTR	protein_coding	KNOWN	NA	NA
chr2	164508167	164508197	37856[gene=ENSMUSG00000017721][PH=3][PH0=0.01][P=8.3e-04]	3	+	2	ENSMUSG00000017721	Pigt	3'UTR	protein_coding	KNOWN	NA	NA
chr13	73816197	73816227	14342[gene=ENSMUSG00000017756][PH=4][PH0=0.02][P=1.6e-05]	4	+	3	ENSMUSG00000017756	Slc12a7	3'UTR	protein_coding	KNOWN	NA	NA
chr8	105943733	105943763	12223[gene=ENSMUSG00000017765][PH=5][PH0=0.01][P=1.2e-08]	5	-	3	ENSMUSG00000017765	Slc12a4	3'UTR	protein_coding	KNOWN	NA	NA
chr11	75706040	75706070	22482[gene=ENSMUSG00000017776][PH=7][PH0=0.10][P=1.3e-07]	7	+	5	ENSMUSG00000017776	Crk	3'UTR	protein_coding	KNOWN	NA	NA
chr11	75705037	75705067	22455[gene=ENSMUSG00000017776][PH=5][PH0=0.10][P=3.9e-04]	5	+	2	ENSMUSG00000017776	Crk	3'UTR	protein_coding	KNOWN	NA	NA
chr11	75680940	75680970	22313[gene=ENSMUSG00000017774][PH=3][PH0=0.03][P=9.6e-03]	3	+	2	ENSMUSG00000017776	Crk	downstream 10K|intron	protein_coding	KNOWN	NA	NA
chr13	86044997	86045027	14336[gene=ENSMUSG00000017778][PH=79][PH0=0.28][P=3.6e-14]	79	-	5	ENSMUSG00000017778	Cox7c	downstream 10K|intron	protein_coding	KNOWN	NA	NA
chr11	75626309	75626339	22224[gene=ENSMUSG00000017781][PH=4][PH0=0.06][P=2.7e-03]	4	+	2	ENSMUSG00000017781	Pitpna	3'UTR	protein_coding	KNOWN	NA	NA
chr11	75612267	75612297	22179[gene=ENSMUSG00000017781][PH=4][PH0=0.06][P=2.7e-03]	4	+	3	ENSMUSG00000017781	Pitpna	3'UTR|CDS	protein_coding	KNOWN	NA	NA
chr11	101091355	101091385	32914[gene=ENSMUSG00000001755][PH=10][PH0=0.05][P=1.0e-100]	10	+	5	ENSMUSG00000017801	Mlx	3'UTR	protein_coding	KNOWN	NA	NA
chr17	53500420	53500450	15367[gene=ENSMUSG00000017831][PH=14][PH0=0.06][P=1.1e-13]	14	+	5	ENSMUSG00000017831	Rab5a	CDS	protein_coding	KNOWN	NA	NA
chr17	53506936	53506966	15410[gene=ENSMUSG00000017831][PH=5][PH0=0.06][P=4.2e-05]	5	+	2	ENSMUSG00000017831	Rab5a	3'UTR	protein_coding	KNOWN	NA	NA
chr12	110582759	110582789	19847[gene=ENSMUSG00000017843][PH=4][PH0=0.03][P=5.4e-04]	4	+	2	ENSMUSG00000017843	Ppp2r5c	3'UTR	protein_coding	KNOWN	NA	NA
chr2	167299605	167299635	34903[gene=ENSMUSG00000017929][PH=4][PH0=0.06][P=2.4e-03]	4	-	1	ENSMUSG00000017929	B4galt5	3'UTR	protein_coding	KNOWN	NA	NA
chr2	167298451	167298481	34876[gene=ENSMUSG00000017929][PH=17][PH0=0.06][P=1.0e-100]	17	-	5	ENSMUSG00000017929	B4galt5	3'UTR	protein_coding	KNOWN	NA	NA
chr2	167298760	167298790	34894[gene=ENSMUSG00000017929][PH=4][PH0=0.06][P=2.4e-03]	4	-	3	ENSMUSG00000017929	B4galt5	3'UTR	protein_coding	KNOWN	NA	NA
chr6	23361633	23361663	1050[gene=ENSMUSG00000017978][PH=2][PH0=0.00][P=1.0e-03]	2	-	2	ENSMUSG00000017978	Cadps2	intron	protein_coding	KNOWN	NA	NA
chr2	167034745	167034775	38589[gene=ENSMUSG00000017999][PH=3][PH0=0.02][P=2.2e-03]	3	+	3	ENSMUSG00000017999	Ddx27	3'UTR	protein_coding	KNOWN	NA	NA
chr5	118764206	118764236	19499[gene=ENSMUSG00000018076][PH=4][PH0=0.06][P=9.1e-03]	4	+	3	ENSMUSG00000018076	Med13l	3'UTR	protein_coding	KNOWN	NA	NA
chr5	118764411	118764441	19513[gene=ENSMUSG00000018076][PH=4][PH0=0.06][P=9.1e-03]	4	+	2	ENSMUSG00000018076	Med13l	3'UTR	protein_coding	KNOWN	NA	NA
chr5	118763437	118763467	19475[gene=ENSMUSG00000018076][PH=7][PH0=0.06][P=1.4e-08]	7	+	3	ENSMUSG00000018076	Med13l	3'UTR	protein_coding	KNOWN	NA	NA
chr5	118765397	118765427	19596[gene=ENSMUSG00000018076][PH=4][PH0=0.06][P=9.1e-03]	4	+	2	ENSMUSG00000018076	Med13l	3'UTR	protein_coding	KNOWN	NA	NA
chr5	118764789	118764819	19543[gene=ENSMUSG00000018076][PH=15][PH0=0.06][P=1.0e-100]	15	+	5	ENSMUSG00000018076	Med13l	3'UTR	protein_coding	KNOWN	NA	NA
chr5	118764933	118764963	19571[gene=ENSMUSG00000018076][PH=9][PH0=0.06][P=6.3e-13]	9	+	3	ENSMUSG00000018076	Med13l	3'UTR	protein_coding	KNOWN	NA	NA
chr5	118765010	118765040	19582[gene=ENSMUSG00000018076][PH=6][PH0=0.06][P=1.5e-06]	6	+	3	ENSMUSG00000018076	Med13l	3'UTR	protein_coding	KNOWN	NA	NA
chr5	139802382	139802412	24231[gene=ENSMUSG00000018143][PH=9][PH0=0.37][P=1.2e-06]	9	+	4	ENSMUSG00000018143	Mafk	3'UTR	protein_coding	KNOWN	NA	NA
chr5	139802503	139802533	24268[gene=ENSMUSG00000018143][PH=81][PH0=0.37][P=1.0e-100]	81	+	5	ENSMUSG00000018143	Mafk	3'UTR	protein_coding	KNOWN	NA	NA
chr5	139802321	139802351	24213[gene=ENSMUSG00000018143][PH=16][PH0=0.37][P=1.0e-100]	16	+	3	ENSMUSG00000018143	Mafk	3'UTR	protein_coding	KNOWN	NA	NA
chr5	139801836	139801866	24186[gene=ENSMUSG00000018143][PH=21][PH0=0.37][P=1.0e-100]	21	+	5	ENSMUSG00000018143	Mafk	3'UTR	protein_coding	KNOWN	NA	NA
chr11	98154616	98154646	29654[gene=ENSMUSG00000018160][PH=11][PH0=0.07][P=1.0e-100]	11	-	5	ENSMUSG00000018160	Med1	3'UTR|intron	protein_coding	KNOWN	NA	NA
chr11	98465834	98465864	29889[gene=ENSMUSG00000018168][PH=6][PH0=0.10][P=1.8e-05]	6	-	3	ENSMUSG00000018168	Ikzf3	3'UTR	protein_coding	KNOWN	NA	NA
chr11	98466248	98466278	29900[gene=ENSMUSG00000018168][PH=8][PH0=0.10][P=4.2e-09]	8	-	4	ENSMUSG00000018168	Ikzf3	3'UTR	protein_coding	KNOWN	NA	NA
chr11	86584717	86584747	25331[gene=ENSMUSG00000018171][PH=7][PH0=0.05][P=3.8e-09]	7	-	3	ENSMUSG00000018171	Vmp1	3'UTR	protein_coding	KNOWN	NA	NA
chr11	86584824	86584854	25340[gene=ENSMUSG00000018171][PH=5][PH0=0.05][P=4.3e-05]	5	-	3	ENSMUSG00000018171	Vmp1	3'UTR	protein_coding	KNOWN	NA	NA
chr11	86584115	86584145	25318[gene=ENSMUSG00000018171][PH=56][PH0=0.05][P=3.2e-13]	56	-	4	ENSMUSG00000018171	Vmp1	3'UTR	protein_coding	KNOWN	NA	NA
chr11	86585352	86585382	25364[gene=ENSMUSG00000018171][PH=9][PH0=0.05][P=3.2e-13]	9	-	5	ENSMUSG00000018171	Vmp1	CDS	protein_coding	KNOWN	NA	NA
chr1	143779030	143779060	22578[gene=ENSMUSG00000018189][PH=6][PH0=0.05][P=7.1e-08]	6	+	5	ENSMUSG00000018189	Uchl5	intron	protein_coding	KNOWN	NA	NA
chr1	143746591	143746621	22554[gene=ENSMUSG00000018196][PH=3][PH0=0.03][P=4.4e-03]	3	+	2	ENSMUSG00000018196	Glrx2	CDS|downstream 10K	protein_coding	KNOWN	NA	NA
chr2	164152190	164152220	37530[gene=ENSMUSG00000018209][PH=43][PH0=0.19][P=1.0e-100]	43	+	5	ENSMUSG00000018209	Stk4	3'UTR	protein_coding	KNOWN	NA	NA
chr2	164155297	164155327	37785[gene=ENSMUSG00000018209][PH=11][PH0=0.19][P=5.3e-12]	11	+	4	ENSMUSG00000018209	Stk4	3'UTR	protein_coding	KNOWN	NA	NA
chr2	164154805	164154835	37750[gene=ENSMUSG00000018209][PH=14][PH0=0.19][P=1.0e-100]	14	+	3	ENSMUSG00000018209	Stk4	3'UTR	protein_coding	KNOWN	NA	NA
chr2	164153699	164153729	37651[gene=ENSMUSG00000018209][PH=21][PH0=0.19][P=1.0e-100]	21	+	5	ENSMUSG00000018209	Stk4	3'UTR	protein_coding	KNOWN	NA	NA
chr2	164154693	164154723	37733[gene=ENSMUSG00000018209][PH=6][PH0=0.19][P=7.2e-04]	6	+	2	ENSMUSG00000018209	Stk4	3'UTR	protein_coding	KNOWN	NA	NA
chr2	164152927	164152957	37619[gene=ENSMUSG00000018209][PH=9][PH0=0.19][P=1.4e-08]	9	+	4	ENSMUSG00000018209	Stk4	3'UTR	protein_coding	KNOWN	NA	NA
chr2	164154527	164154557	37702[gene=ENSMUSG00000018209][PH=30][PH0=0.19][P=1.0e-100]	30	+	5	ENSMUSG00000018209	Stk4	3'UTR	protein_coding	KNOWN	NA	NA
chr11	53332721	53332751	13544[gene=ENSMUSG00000018239][PH=7][PH0=0.04][P=1.2e-10]	7	+	3	ENSMUSG00000018239	Zcchc10	3'UTR	protein_coding	KNOWN	NA	NA
chr11	70527589	70527619	19792[gene=ENSMUSG00000046811][PH=3][PH0=0.03][P=3.7e-03]	3	+	2	ENSMUSG00000018286	Psmb6	3'UTR	protein_coding	KNOWN	NA	NA
chr11	70651995	70652025	19094[gene=ENSMUSG00000018293][PH=60][PH0=0.48][P=1.0e-100]	60	-	4	ENSMUSG00000018293	Pfn1	3'UTR	protein_coding	KNOWN	NA	NA
chr11	70651851	70651881	19040[gene=ENSMUSG00000018293][PH=33][PH0=0.48][P=1.0e-100]	33	-	5	ENSMUSG00000018293	Pfn1	3'UTR	protein_coding	KNOWN	NA	NA
chr2	164054115	164054145	34015[gene=ENSMUSG00000018322][PH=47][PH0=0.12][P=1.0e-100]	47	-	5	ENSMUSG00000018322	Tomm34	3'UTR	protein_coding	KNOWN	NA	NA
chr11	79013603	79013633	22111[gene=ENSMUSG00000018334][PH=4][PH0=0.03][P=7.6e-04]	4	-	3	ENSMUSG00000018334	Ksr1	3'UTR	protein_coding	KNOWN	NA	NA
chr11	79013545	79013575	22104[gene=ENSMUSG00000018334][PH=6][PH0=0.03][P=4.3e-08]	6	-	3	ENSMUSG00000018334	Ksr1	3'UTR	protein_coding	KNOWN	NA	NA
chr11	55030110	55030140	15119[gene=ENSMUSG00000018340][PH=3][PH0=0.01][P=4.7e-04]	3	-	1	ENSMUSG00000018340	Anxa6	intron	protein_coding	KNOWN	NA	NA
chr11	106822417	106822447	35579[gene=ENSMUSG00000018363][PH=6][PH0=0.04][P=1.5e-07]	6	-	4	ENSMUSG00000018363	Smurf2	3'UTR	protein_coding	KNOWN	NA	NA
chr11	106822603	106822633	35592[gene=ENSMUSG00000018363][PH=4][PH0=0.04][P=1.6e-03]	4	-	3	ENSMUSG00000018363	Smurf2	3'UTR	protein_coding	KNOWN	NA	NA
chr11	88082420	88082450	28567[gene=ENSMUSG00000018377][PH=4][PH0=0.08][P=4.0e-03]	4	+	3	ENSMUSG00000018377	Vezf1	3'UTR	protein_coding	KNOWN	NA	NA
chr11	88082841	88082871	28578[gene=ENSMUSG00000018377][PH=4][PH0=0.08][P=4.0e-03]	4	+	2	ENSMUSG00000018377	Vezf1	3'UTR	protein_coding	KNOWN	NA	NA
chr11	88081998	88082028	28549[gene=ENSMUSG00000018377][PH=4][PH0=0.08][P=4.0e-03]	4	+	2	ENSMUSG00000018377	Vezf1	3'UTR	protein_coding	KNOWN	NA	NA
chr11	88053343	88053373	28460[gene=ENSMUSG00000018379][PH=15][PH0=0.62][P=2.2e-12]	15	+	4	ENSMUSG00000018379	Srsf1	3'UTR	protein_coding	KNOWN	NA	NA
chr11	88051040	88051070	28291[gene=ENSMUSG00000018379][PH=36][PH0=0.62][P=1.0e-100]	36	+	5	ENSMUSG00000018379	Srsf1	3'UTR	protein_coding	KNOWN	NA	NA
chr11	88049971	88050001	28147[gene=ENSMUSG00000018379][PH=9][PH0=0.62][P=7.7e-05]	9	+	4	ENSMUSG00000018379	Srsf1	3'UTR|CDS	protein_coding	KNOWN	NA	NA
chr11	88050701	88050731	28240[gene=ENSMUSG00000018379][PH=8][PH0=0.62][P=9.8e-04]	8	+	4	ENSMUSG00000018379	Srsf1	3'UTR|intron	protein_coding	KNOWN	NA	NA
chr11	88049820	88049850	28128[gene=ENSMUSG00000018379][PH=8][PH0=0.62][P=9.8e-04]	8	+	3	ENSMUSG00000018379	Srsf1	3'UTR|intron	protein_coding	KNOWN	NA	NA
chr11	88050587	88050617	28211[gene=ENSMUSG00000018379][PH=22][PH0=0.62][P=1.0e-100]	22	+	5	ENSMUSG00000018379	Srsf1	3'UTR|intron	protein_coding	KNOWN	NA	NA
chr11	88049793	88049823	28122[gene=ENSMUSG00000018379][PH=10][PH0=0.62][P=5.4e-06]	10	+	3	ENSMUSG00000018379	Srsf1	3'UTR|intron	protein_coding	KNOWN	NA	NA
chr11	88051199	88051229	28340[gene=ENSMUSG00000018379][PH=8][PH0=0.62][P=9.8e-04]	8	+	3	ENSMUSG00000018379	Srsf1	3'UTR	protein_coding	KNOWN	NA	NA
chr11	88050486	88050516	28189[gene=ENSMUSG00000018379][PH=9][PH0=0.62][P=7.7e-05]	9	+	4	ENSMUSG00000018379	Srsf1	3'UTR|intron	protein_coding	KNOWN	NA	NA
chr11	104333762	104333792	33423[gene=ENSMUSG00000018412][PH=20][PH0=0.10][P=1.0e-100]	20	-	5	ENSMUSG00000018412	Kansl1	3'UTR	protein_coding	KNOWN	NA	NA
chr11	104333995	104334025	33454[gene=ENSMUSG00000018412][PH=6][PH0=0.10][P=2.7e-05]	6	-	3	ENSMUSG00000018412	Kansl1	3'UTR	protein_coding	KNOWN	NA	NA
chr11	104425056	104425086	33984[gene=ENSMUSG00000018412][PH=15][PH0=0.10][P=1.0e-100]	15	-	5	ENSMUSG00000018412	Kansl1	CDS	protein_coding	KNOWN	NA	NA
chr11	60442807	60442837	17242[gene=ENSMUSG00000018415][PH=5][PH0=0.03][P=8.7e-07]	5	+	4	ENSMUSG00000018415	Gid4	3'UTR|intron	protein_coding	KNOWN	NA	NA
chr11	60442917	60442947	17250[gene=ENSMUSG00000018415][PH=4][PH0=0.03][P=1.2e-04]	4	+	3	ENSMUSG00000018415	Gid4	3'UTR|intron	protein_coding	KNOWN	NA	NA
chr11	86938492	86938522	26195[gene=ENSMUSG00000018427][PH=3][PH0=0.01][P=2.1e-04]	3	-	1	ENSMUSG00000018427	Ypel2	3'UTR	protein_coding	KNOWN	NA	NA
chr11	107167114	107167144	36060[gene=ENSMUSG00000018433][PH=7][PH0=0.06][P=3.1e-09]	7	-	4	ENSMUSG00000018433	Nol11	3'UTR	protein_coding	KNOWN	NA	NA
chr11	107181838	107181868	36106[gene=ENSMUSG00000018433][PH=6][PH0=0.06][P=3.1e-07]	6	-	3	ENSMUSG00000018433	Nol11	CDS	protein_coding	KNOWN	NA	NA
chr11	71014609	71014639	19580[gene=ENSMUSG00000018442][PH=5][PH0=0.07][P=3.0e-05]	5	-	2	ENSMUSG00000018442	Derl2	3'UTR|CDS|intron	protein_coding	KNOWN	NA	NA
chr11	71008832	71008862	19547[gene=ENSMUSG00000018442][PH=4][PH0=0.07][P=1.8e-03]	4	-	2	ENSMUSG00000018442	Derl2	3'UTR|intron	protein_coding	KNOWN	NA	NA
chr11	71008802	71008832	19543[gene=ENSMUSG00000018442][PH=4][PH0=0.07][P=1.8e-03]	4	-	1	ENSMUSG00000018442	Derl2	3'UTR|intron	protein_coding	KNOWN	NA	NA
chr11	70977866	70977896	19303[gene=ENSMUSG00000018446][PH=38][PH0=0.33][P=1.0e-100]	38	-	5	ENSMUSG00000018446	C1qbp	3'UTR	protein_coding	KNOWN	NA	NA
chr11	70978032	70978062	19381[gene=ENSMUSG00000018446][PH=40][PH0=0.33][P=1.0e-100]	40	-	5	ENSMUSG00000018446	C1qbp	3'UTR	protein_coding	KNOWN	NA	NA
chr11	70982170	70982200	19421[gene=ENSMUSG00000018446][PH=6][PH0=0.33][P=3.0e-03]	6	-	3	ENSMUSG00000018446	C1qbp	CDS|downstream 10K	protein_coding	KNOWN	NA	NA
chr11	69350522	69350552	17759[gene=ENSMUSG00000018474][PH=5][PH0=0.16][P=3.5e-03]	5	-	3	ENSMUSG00000018474	Chd3	intron	protein_coding	KNOWN	NA	NA
chr11	69350464	69350494	17727[gene=ENSMUSG00000018474][PH=110][PH0=0.16][P=1.0e-100]	110	-	5	ENSMUSG00000018474	Chd3	intron	protein_coding	KNOWN	NA	NA
chr11	69398959	69398989	17955[gene=ENSMUSG00000018476][PH=10][PH0=1.01][P=6.6e-04]	10	-	4	ENSMUSG00000018476	Kdm6b	3'UTR	protein_coding	KNOWN	NA	NA
chr11	69399306	69399336	18061[gene=ENSMUSG00000018476][PH=18][PH0=1.01][P=6.7e-13]	18	-	5	ENSMUSG00000018476	Kdm6b	3'UTR	protein_coding	KNOWN	NA	NA
chr11	69398854	69398884	17921[gene=ENSMUSG00000018476][PH=23][PH0=1.01][P=1.0e-100]	23	-	5	ENSMUSG00000018476	Kdm6b	3'UTR	protein_coding	KNOWN	NA	NA
chr11	69398518	69398548	17855[gene=ENSMUSG00000018476][PH=105][PH0=1.01][P=1.0e-100]	105	-	5	ENSMUSG00000018476	Kdm6b	3'UTR	protein_coding	KNOWN	NA	NA
chr11	69399631	69399661	18131[gene=ENSMUSG00000018476][PH=247][PH0=1.01][P=1.0e-100]	247	-	5	ENSMUSG00000018476	Kdm6b	3'UTR	protein_coding	KNOWN	NA	NA
chr11	69399148	69399178	17994[gene=ENSMUSG00000018476][PH=83][PH0=1.01][P=1.0e-100]	83	-	5	ENSMUSG00000018476	Kdm6b	3'UTR	protein_coding	KNOWN	NA	NA
chr11	85188077	85188107	24259[gene=ENSMUSG00000018481][PH=5][PH0=0.08][P=2.1e-04]	5	-	3	ENSMUSG00000018481	Appbp2	3'UTR	protein_coding	KNOWN	NA	NA
chr11	85189021	85189051	24289[gene=ENSMUSG00000018481][PH=6][PH0=0.08][P=3.4e-06]	6	-	2	ENSMUSG00000018481	Appbp2	3'UTR	protein_coding	KNOWN	NA	NA
chr11	62389723	62389753	16509[gene=ENSMUSG00000018501][PH=5][PH0=0.06][P=8.5e-05]	5	-	3	ENSMUSG00000018501	Ncor1	CDS	protein_coding	KNOWN	NA	NA
chr11	62401205	62401235	16563[gene=ENSMUSG00000018501][PH=6][PH0=0.06][P=9.5e-07]	6	-	3	ENSMUSG00000018501	Ncor1	CDS|downstream 10K	protein_coding	KNOWN	NA	NA
chr11	62425998	62426028	16641[gene=ENSMUSG00000018501][PH=4][PH0=0.06][P=6.1e-03]	4	-	1	ENSMUSG00000018501	Ncor1	intron	protein_coding	KNOWN	NA	NA
chr11	62534383	62534413	16723[gene=ENSMUSG00000018509][PH=2][PH0=0.00][P=6.2e-03]	2	-	1	ENSMUSG00000018509	Cenpv	intron	protein_coding	KNOWN	NA	NA
chr11	97746939	97746969	29361[gene=ENSMUSG00000018541][PH=4][PH0=0.03][P=6.8e-05]	4	-	3	ENSMUSG00000018541	Cwc25	3'UTR	protein_coding	KNOWN	NA	NA
chr11	87219286	87219316	27622[gene=ENSMUSG00000018548][PH=4][PH0=0.02][P=3.0e-05]	4	+	4	ENSMUSG00000018548	Trim37	3'UTR	protein_coding	KNOWN	NA	NA
chr11	55500314	55500344	15586[gene=ENSMUSG00000018583][PH=39][PH0=0.18][P=2.7e-13]	39	+	5	ENSMUSG00000018583	G3bp1	3'UTR	protein_coding	KNOWN	NA	NA
chr11	55500442	55500472	15620[gene=ENSMUSG00000018583][PH=7][PH0=0.18][P=9.3e-06]	7	+	2	ENSMUSG00000018583	G3bp1	3'UTR	protein_coding	KNOWN	NA	NA
chr11	55482801	55482831	15466[gene=ENSMUSG00000018583][PH=42][PH0=0.18][P=2.7e-13]	42	+	5	ENSMUSG00000018583	G3bp1	intron	protein_coding	KNOWN	NA	NA
chr11	60732368	60732398	17450[gene=ENSMUSG00000018599][PH=4][PH0=0.01][P=1.8e-06]	4	+	1	ENSMUSG00000018599	Mief2	3'UTR	protein_coding	KNOWN	NA	NA
chr11	11771282	11771312	3230[gene=ENSMUSG00000018654][PH=8][PH0=0.35][P=8.2e-05]	8	+	4	ENSMUSG00000018654	Ikzf1	3'UTR	protein_coding	KNOWN	NA	NA
chr11	11770709	11770739	3184[gene=ENSMUSG00000018654][PH=14][PH0=0.35][P=2.9e-13]	14	+	5	ENSMUSG00000018654	Ikzf1	3'UTR	protein_coding	KNOWN	NA	NA
chr11	11771605	11771635	3292[gene=ENSMUSG00000018654][PH=10][PH0=0.35][P=1.4e-07]	10	+	4	ENSMUSG00000018654	Ikzf1	3'UTR	protein_coding	KNOWN	NA	NA
chr11	11771394	11771424	3248[gene=ENSMUSG00000018654][PH=28][PH0=0.35][P=1.0e-100]	28	+	5	ENSMUSG00000018654	Ikzf1	3'UTR	protein_coding	KNOWN	NA	NA
chr11	11748325	11748355	2877[gene=ENSMUSG00000018654][PH=8][PH0=0.35][P=8.2e-05]	8	+	4	ENSMUSG00000018654	Ikzf1	CDS|intron	protein_coding	KNOWN	NA	NA
chr11	11717134	11717164	2411[gene=ENSMUSG00000018654][PH=16][PH0=0.35][P=1.0e-100]	16	+	4	ENSMUSG00000018654	Ikzf1	intron	protein_coding	KNOWN	NA	NA
chr11	11724348	11724378	2559[gene=ENSMUSG00000018654][PH=9][PH0=0.35][P=3.6e-06]	9	+	2	ENSMUSG00000018654	Ikzf1	intron	protein_coding	KNOWN	NA	NA
chr11	11707962	11707992	2182[gene=ENSMUSG00000018654][PH=7][PH0=0.35][P=1.6e-03]	7	+	2	ENSMUSG00000018654	Ikzf1	intron	protein_coding	KNOWN	NA	NA
chr11	11772021	11772051	3353[gene=ENSMUSG00000018654][PH=38][PH0=0.35][P=1.0e-100]	38	+	5	ENSMUSG00000018654	Ikzf1	3'UTR	protein_coding	KNOWN	NA	NA
chr11	11771554	11771584	3276[gene=ENSMUSG00000018654][PH=7][PH0=0.35][P=1.6e-03]	7	+	3	ENSMUSG00000018654	Ikzf1	3'UTR	protein_coding	KNOWN	NA	NA
chr11	11770611	11770641	3167[gene=ENSMUSG00000018654][PH=10][PH0=0.35][P=1.4e-07]	10	+	4	ENSMUSG00000018654	Ikzf1	3'UTR	protein_coding	KNOWN	NA	NA
chr11	11772601	11772631	3400[gene=ENSMUSG00000018654][PH=7][PH0=0.35][P=1.6e-03]	7	+	4	ENSMUSG00000018654	Ikzf1	3'UTR	protein_coding	KNOWN	NA	NA
chr11	96803079	96803109	31421[gene=ENSMUSG00000018666][PH=4][PH0=0.04][P=2.7e-04]	4	+	2	ENSMUSG00000018666	Cbx1	3'UTR|intron	protein_coding	KNOWN	NA	NA
chr11	96953472	96953502	28881[gene=ENSMUSG00000018678][PH=5][PH0=0.04][P=5.4e-06]	5	-	2	ENSMUSG00000018678	Sp2	3'UTR	protein_coding	KNOWN	NA	NA
chr11	96953643	96953673	28897[gene=ENSMUSG00000018678][PH=7][PH0=0.04][P=3.2e-10]	7	-	4	ENSMUSG00000018678	Sp2	3'UTR	protein_coding	KNOWN	NA	NA
chr11	96953429	96953459	28875[gene=ENSMUSG00000018678][PH=5][PH0=0.04][P=5.4e-06]	5	-	4	ENSMUSG00000018678	Sp2	3'UTR	protein_coding	KNOWN	NA	NA
chr11	84465279	84465309	23602[gene=ENSMUSG00000018697][PH=7][PH0=0.07][P=2.5e-08]	7	-	4	ENSMUSG00000018697	Aatf	intron	protein_coding	KNOWN	NA	NA
chr11	84490365	84490395	23685[gene=ENSMUSG00000018697][PH=4][PH0=0.07][P=9.0e-03]	4	-	3	ENSMUSG00000018697	Aatf	intron	protein_coding	KNOWN	NA	NA
chr11	68821593	68821623	17437[gene=ENSMUSG00000018736][PH=4][PH0=0.05][P=2.0e-03]	4	-	3	ENSMUSG00000018736	Ndel1	3'UTR	protein_coding	KNOWN	NA	NA
chr11	68821551	68821581	17420[gene=ENSMUSG00000018736][PH=29][PH0=0.05][P=1.0e-100]	29	-	5	ENSMUSG00000018736	Ndel1	3'UTR	protein_coding	KNOWN	NA	NA
chr11	68829827	68829857	17465[gene=ENSMUSG00000018736][PH=4][PH0=0.05][P=2.0e-03]	4	-	3	ENSMUSG00000018736	Ndel1	3'UTR|intron	protein_coding	KNOWN	NA	NA
chr11	68821448	68821478	17385[gene=ENSMUSG00000018736][PH=6][PH0=0.05][P=2.8e-07]	6	-	3	ENSMUSG00000018736	Ndel1	3'UTR	protein_coding	KNOWN	NA	NA
chr11	68821617	68821647	17439[gene=ENSMUSG00000018736][PH=4][PH0=0.05][P=2.0e-03]	4	-	3	ENSMUSG00000018736	Ndel1	3'UTR	protein_coding	KNOWN	NA	NA
chr11	69653255	69653285	19485[gene=ENSMUSG00000018765][PH=76][PH0=0.11][P=8.9e-14]	76	+	5	ENSMUSG00000018765	Fxr2	3'UTR	protein_coding	KNOWN	NA	NA
chr2	73908502	73908532	18237[gene=ENSMUSG00000018770][PH=3][PH0=0.03][P=5.5e-03]	3	-	3	ENSMUSG00000018770	Atp5g3	3'UTR	protein_coding	KNOWN	NA	NA
chr2	73908546	73908576	18241[gene=ENSMUSG00000018770][PH=3][PH0=0.03][P=5.5e-03]	3	-	3	ENSMUSG00000018770	Atp5g3	3'UTR	protein_coding	KNOWN	NA	NA
chr19	42191369	42191399	13109[gene=ENSMUSG00000018820][PH=13][PH0=0.04][P=1.2e-13]	13	+	5	ENSMUSG00000018820	Zfyve27	3'UTR	protein_coding	KNOWN	NA	NA
chr19	42191219	42191249	13100[gene=ENSMUSG00000018820][PH=5][PH0=0.04][P=7.5e-06]	5	+	3	ENSMUSG00000018820	Zfyve27	3'UTR	protein_coding	KNOWN	NA	NA
chr11	82878385	82878415	23232[gene=ENSMUSG00000018841][PH=4][PH0=0.05][P=4.8e-04]	4	-	3	ENSMUSG00000018841	Rad51d	3'UTR	protein_coding	KNOWN	NA	NA
chr11	35791042	35791072	10233[gene=ENSMUSG00000018846][PH=24][PH0=0.31][P=9.3e-14]	24	+	4	ENSMUSG00000018846	Pank3	3'UTR	protein_coding	KNOWN	NA	NA
chr11	35787740	35787770	10070[gene=ENSMUSG00000018846][PH=7][PH0=0.31][P=2.1e-04]	7	+	4	ENSMUSG00000018846	Pank3	3'UTR	protein_coding	KNOWN	NA	NA
chr11	35785726	35785756	9955[gene=ENSMUSG00000018846][PH=26][PH0=0.31][P=9.3e-14]	26	+	4	ENSMUSG00000018846	Pank3	3'UTR	protein_coding	KNOWN	NA	NA
chr11	35787627	35787657	10058[gene=ENSMUSG00000018846][PH=6][PH0=0.31][P=4.0e-03]	6	+	2	ENSMUSG00000018846	Pank3	3'UTR	protein_coding	KNOWN	NA	NA
chr11	35790946	35790976	10203[gene=ENSMUSG00000018846][PH=18][PH0=0.31][P=9.3e-14]	18	+	5	ENSMUSG00000018846	Pank3	3'UTR	protein_coding	KNOWN	NA	NA
chr11	35785959	35785989	10004[gene=ENSMUSG00000018846][PH=7][PH0=0.31][P=2.1e-04]	7	+	4	ENSMUSG00000018846	Pank3	3'UTR	protein_coding	KNOWN	NA	NA
chr11	35785978	35786008	10008[gene=ENSMUSG00000018846][PH=6][PH0=0.31][P=4.0e-03]	6	+	5	ENSMUSG00000018846	Pank3	3'UTR	protein_coding	KNOWN	NA	NA
chr11	35789446	35789476	10138[gene=ENSMUSG00000018846][PH=10][PH0=0.31][P=1.2e-08]	10	+	3	ENSMUSG00000018846	Pank3	3'UTR	protein_coding	KNOWN	NA	NA
chr11	35791238	35791268	10262[gene=ENSMUSG00000018846][PH=6][PH0=0.31][P=4.0e-03]	6	+	3	ENSMUSG00000018846	Pank3	3'UTR	protein_coding	KNOWN	NA	NA
chr11	35781598	35781628	9910[gene=ENSMUSG00000018846][PH=9][PH0=0.31][P=3.5e-07]	9	+	3	ENSMUSG00000018846	Pank3	CDS	protein_coding	KNOWN	NA	NA
chr11	35778699	35778729	9894[gene=ENSMUSG00000018846][PH=8][PH0=0.31][P=9.1e-06]	8	+	5	ENSMUSG00000018846	Pank3	CDS	protein_coding	KNOWN	NA	NA
chr11	53777228	53777258	14056[gene=ENSMUSG00000018899][PH=35][PH0=0.25][P=1.0e-100]	35	+	5	ENSMUSG00000018899	Irf1	3'UTR|intron	protein_coding	KNOWN	NA	NA
chr11	53777297	53777327	14087[gene=ENSMUSG00000018899][PH=16][PH0=0.25][P=1.0e-100]	16	+	3	ENSMUSG00000018899	Irf1	3'UTR|intron	protein_coding	KNOWN	NA	NA
chr11	53777124	53777154	14037[gene=ENSMUSG00000018899][PH=16][PH0=0.25][P=1.0e-100]	16	+	2	ENSMUSG00000018899	Irf1	3'UTR|intron	protein_coding	KNOWN	NA	NA
chr11	54247281	54247311	14642[gene=ENSMUSG00000018916][PH=16][PH0=0.07][P=3.6e-14]	16	-	5	ENSMUSG00000018916	Csf2	3'UTR	protein_coding	KNOWN	NA	NA
chr11	70394357	70394387	18947[gene=ENSMUSG00000018921][PH=5][PH0=0.04][P=4.2e-06]	5	-	2	ENSMUSG00000018921	Pelp1	CDS|downstream 10K	protein_coding	KNOWN	NA	NA
chr11	83664557	83664587	26586[gene=ENSMUSG00000018930][PH=32][PH0=0.15][P=1.0e-100]	32	+	5	ENSMUSG00000018930	Ccl4	3'UTR	protein_coding	KNOWN	NA	NA
chr11	60952224	60952254	17619[gene=ENSMUSG00000018932][PH=43][PH0=0.11][P=9.0e-14]	43	+	5	ENSMUSG00000018932	Map2k3	3'UTR	protein_coding	KNOWN	NA	NA
chr11	60952766	60952796	17664[gene=ENSMUSG00000018932][PH=10][PH0=0.11][P=7.2e-13]	10	+	5	ENSMUSG00000018932	Map2k3	3'UTR	protein_coding	KNOWN	NA	NA
chr5	113742633	113742663	16968[gene=ENSMUSG00000018974][PH=4][PH0=0.02][P=3.4e-05]	4	-	3	ENSMUSG00000018974	Sart3	3'UTR	protein_coding	KNOWN	NA	NA
chrX	74304349	74304379	6172[gene=ENSMUSG00000019087][PH=5][PH0=0.05][P=6.6e-06]	5	+	3	ENSMUSG00000019087	Atp6ap1	3'UTR	protein_coding	KNOWN	NA	NA
chr13	24802728	24802758	5290[gene=ENSMUSG00000019132][PH=5][PH0=0.18][P=3.3e-03]	5	+	3	ENSMUSG00000019132	BC005537	5'UTR|intron	protein_coding	KNOWN	NA	NA
chr13	24802926	24802956	5303[gene=ENSMUSG00000019132][PH=8][PH0=0.18][P=8.7e-08]	8	+	3	ENSMUSG00000019132	BC005537	5'UTR|intron	protein_coding	KNOWN	NA	NA
chr11	100715289	100715319	31283[gene=ENSMUSG00000019173][PH=5][PH0=0.06][P=2.0e-05]	5	-	3	ENSMUSG00000019173	Rab5c	3'UTR	protein_coding	KNOWN	NA	NA
chr11	100715805	100715835	31296[gene=ENSMUSG00000019173][PH=5][PH0=0.06][P=2.0e-05]	5	-	4	ENSMUSG00000019173	Rab5c	3'UTR	protein_coding	KNOWN	NA	NA
chr11	100715171	100715201	31274[gene=ENSMUSG00000019173][PH=5][PH0=0.06][P=2.0e-05]	5	-	3	ENSMUSG00000019173	Rab5c	3'UTR	protein_coding	KNOWN	NA	NA
chr5	135790260	135790290	23495[gene=ENSMUSG00000019179][PH=33][PH0=0.10][P=1.0e-100]	33	+	5	ENSMUSG00000019179	Mdh2	3'UTR	protein_coding	KNOWN	NA	NA
chr2	152704991	152705021	32489[gene=ENSMUSG00000019188][PH=9][PH0=0.09][P=7.4e-12]	9	+	5	ENSMUSG00000019188	H13	3'UTR	protein_coding	KNOWN	NA	NA
chr11	44565371	44565401	10931[gene=ENSMUSG00000019189][PH=16][PH0=0.12][P=1.0e-100]	16	+	5	ENSMUSG00000019189	Rnf145	3'UTR	protein_coding	KNOWN	NA	NA
chr11	44564983	44565013	10863[gene=ENSMUSG00000019189][PH=18][PH0=0.12][P=1.0e-100]	18	+	4	ENSMUSG00000019189	Rnf145	3'UTR	protein_coding	KNOWN	NA	NA
chr11	44565450	44565480	10948[gene=ENSMUSG00000019189][PH=6][PH0=0.12][P=3.8e-05]	6	+	4	ENSMUSG00000019189	Rnf145	3'UTR	protein_coding	KNOWN	NA	NA
chr11	44565123	44565153	10894[gene=ENSMUSG00000019189][PH=6][PH0=0.12][P=3.8e-05]	6	+	3	ENSMUSG00000019189	Rnf145	3'UTR	protein_coding	KNOWN	NA	NA
chr11	44565291	44565321	10911[gene=ENSMUSG00000019189][PH=5][PH0=0.12][P=1.5e-03]	5	+	4	ENSMUSG00000019189	Rnf145	3'UTR	protein_coding	KNOWN	NA	NA
chr11	44561496	44561526	10781[gene=ENSMUSG00000019189][PH=21][PH0=0.12][P=1.0e-100]	21	+	4	ENSMUSG00000019189	Rnf145	CDS|downstream 10K	protein_coding	KNOWN	NA	NA
chr11	44564508	44564538	10829[gene=ENSMUSG00000019189][PH=12][PH0=0.12][P=1.0e-100]	12	+	5	ENSMUSG00000019189	Rnf145	3'UTR	protein_coding	KNOWN	NA	NA
chr6	120795245	120795275	23602[gene=ENSMUSG00000019210][PH=12][PH0=0.03][P=1.0e-100]	12	-	5	ENSMUSG00000019210	Atp6v1e1	3'UTR	protein_coding	KNOWN	NA	NA
chr7	4497954	4497984	168[gene=ENSMUSG00000019254][PH=5][PH0=0.03][P=1.2e-06]	5	-	3	ENSMUSG00000019254	Ppp1r12c	downstream 10K|intron	protein_coding	KNOWN	NA	NA
chr5	33653238	33653268	4748[gene=ENSMUSG00000019295][PH=3][PH0=0.02][P=2.3e-03]	3	-	2	ENSMUSG00000019295	Tmem129	3'UTR	protein_coding	KNOWN	NA	NA
chr7	16915423	16915453	1218[gene=ENSMUSG00000019370][PH=7][PH0=0.03][P=5.7e-12]	7	-	3	ENSMUSG00000019370	Calm3	3'UTR	protein_coding	KNOWN	NA	NA
chr17	35242719	35242749	9833[gene=ENSMUSG00000024403][PH=28][PH0=0.45][P=1.0e-100]	28	+	4	ENSMUSG00000019432	Ddx39b	5'UTR|downstream 10K|intron	protein_coding	KNOWN	NA	NA
chr17	35247213	35247243	9886[gene=ENSMUSG00000024403][PH=140][PH0=0.45][P=1.0e-100]	140	+	5	ENSMUSG00000019432	Ddx39b	downstream 10K|intron	protein_coding	KNOWN	NA	NA
chr11	62553165	62553195	18105[gene=ENSMUSG00000019505][PH=6][PH0=0.04][P=1.2e-08]	6	+	4	ENSMUSG00000019505	Ubb	3'UTR	protein_coding	KNOWN	NA	NA
chr17	56068261	56068291	16503[gene=ENSMUSG00000019578][PH=5][PH0=0.02][P=2.6e-08]	5	-	3	ENSMUSG00000019578	Ubxn6	3'UTR	protein_coding	KNOWN	NA	NA
chr6	38533968	38533998	6781[gene=ENSMUSG00000038538][PH=12][PH0=0.04][P=1.0e-100]	12	+	4	ENSMUSG00000019689	1110001J03Rik	downstream 10K|intron	protein_coding	KNOWN	NA	tRNA-Arg-AGG
chr1	177022431	177022461	39536[gene=ENSMUSG00000019699][PH=17][PH0=0.06][P=1.0e-100]	17	-	4	ENSMUSG00000019699	Akt3	3'UTR|intron	protein_coding	KNOWN	NA	NA
chr1	177024340	177024370	39568[gene=ENSMUSG00000019699][PH=8][PH0=0.06][P=3.1e-10]	8	-	4	ENSMUSG00000019699	Akt3	3'UTR|intron	protein_coding	KNOWN	NA	NA
chr1	177024543	177024573	39585[gene=ENSMUSG00000019699][PH=10][PH0=0.06][P=1.0e-100]	10	-	4	ENSMUSG00000019699	Akt3	3'UTR|intron	protein_coding	KNOWN	NA	NA
chr8	72480892	72480922	7467[gene=ENSMUSG00000019731][PH=23][PH0=0.12][P=1.0e-100]	23	-	4	ENSMUSG00000019731	Slc35e1	3'UTR	protein_coding	KNOWN	NA	NA
chr8	72480997	72481027	7487[gene=ENSMUSG00000019731][PH=8][PH0=0.12][P=3.1e-09]	8	-	3	ENSMUSG00000019731	Slc35e1	3'UTR	protein_coding	KNOWN	NA	NA
chr8	72481112	72481142	7500[gene=ENSMUSG00000019731][PH=5][PH0=0.12][P=4.3e-04]	5	-	4	ENSMUSG00000019731	Slc35e1	3'UTR	protein_coding	KNOWN	NA	NA
chr10	37001700	37001730	6414[gene=ENSMUSG00000019777][PH=5][PH0=0.10][P=3.7e-04]	5	+	3	ENSMUSG00000019777	Hdac2	3'UTR	protein_coding	KNOWN	NA	NA
chr10	37001783	37001813	6450[gene=ENSMUSG00000019777][PH=30][PH0=0.10][P=1.0e-100]	30	+	5	ENSMUSG00000019777	Hdac2	3'UTR	protein_coding	KNOWN	NA	NA
chr10	7759728	7759758	1076[gene=ENSMUSG00000019794][PH=6][PH0=0.04][P=4.6e-08]	6	+	2	ENSMUSG00000019794	Katna1	CDS|downstream 10K	protein_coding	KNOWN	NA	NA
chr10	7637737	7637767	853[gene=ENSMUSG00000019795][PH=8][PH0=0.03][P=9.1e-13]	8	-	4	ENSMUSG00000019795	Pcmt1	3'UTR|intron	protein_coding	KNOWN	NA	NA
chr10	7629850	7629880	827[gene=ENSMUSG00000019795][PH=6][PH0=0.03][P=2.3e-08]	6	-	4	ENSMUSG00000019795	Pcmt1	3'UTR	protein_coding	KNOWN	NA	NA
chr10	42535254	42535284	9286[gene=ENSMUSG00000019804][PH=7][PH0=0.10][P=1.7e-07]	7	+	3	ENSMUSG00000019804	Snx3	3'UTR	protein_coding	KNOWN	NA	NA
chr10	42535337	42535367	9304[gene=ENSMUSG00000019804][PH=8][PH0=0.10][P=2.5e-09]	8	+	3	ENSMUSG00000019804	Snx3	3'UTR	protein_coding	KNOWN	NA	NA
chr10	42502912	42502942	9123[gene=ENSMUSG00000019804][PH=6][PH0=0.10][P=1.0e-05]	6	+	1	ENSMUSG00000019804	Snx3	intron	protein_coding	KNOWN	NA	NA
chr10	42535150	42535180	9263[gene=ENSMUSG00000019804][PH=20][PH0=0.10][P=1.0e-100]	20	+	5	ENSMUSG00000019804	Snx3	3'UTR	protein_coding	KNOWN	NA	NA
chr10	13178641	13178671	3509[gene=ENSMUSG00000019814][PH=8][PH0=0.06][P=2.5e-11]	8	-	3	ENSMUSG00000019814	Ltv1	3'UTR	protein_coding	KNOWN	NA	NA
chr10	13178826	13178856	3531[gene=ENSMUSG00000019814][PH=6][PH0=0.06][P=2.8e-07]	6	-	3	ENSMUSG00000019814	Ltv1	3'UTR	protein_coding	KNOWN	NA	NA
chr10	13129357	13129387	1644[gene=ENSMUSG00000019817][PH=3][PH0=0.01][P=7.4e-04]	3	+	3	ENSMUSG00000019817	Plagl1	3'UTR|intron	protein_coding	KNOWN	NA	NA
chr10	41530411	41530441	8904[gene=ENSMUSG00000019818][PH=7][PH0=0.28][P=6.9e-05]	7	+	3	ENSMUSG00000019818	Cd164	3'UTR	protein_coding	KNOWN	NA	NA
chr10	41530987	41531017	8970[gene=ENSMUSG00000019818][PH=9][PH0=0.28][P=9.4e-08]	9	+	4	ENSMUSG00000019818	Cd164	3'UTR	protein_coding	KNOWN	NA	NA
chr10	41530565	41530595	8926[gene=ENSMUSG00000019818][PH=8][PH0=0.28][P=2.7e-06]	8	+	4	ENSMUSG00000019818	Cd164	3'UTR	protein_coding	KNOWN	NA	NA
chr10	41521976	41522006	8727[gene=ENSMUSG00000078451][PH=3][PH0=0.01][P=2.1e-04]	3	+	1	ENSMUSG00000019818	Cd164	CDS|downstream 10K	protein_coding	KNOWN	NA	NA
chr10	41529477	41529507	8809[gene=ENSMUSG00000019818][PH=7][PH0=0.28][P=6.9e-05]	7	+	4	ENSMUSG00000019818	Cd164	3'UTR	protein_coding	KNOWN	NA	NA
chr10	41529640	41529670	8838[gene=ENSMUSG00000019818][PH=19][PH0=0.28][P=1.0e-100]	19	+	5	ENSMUSG00000019818	Cd164	3'UTR	protein_coding	KNOWN	NA	NA
chr10	41529931	41529961	8877[gene=ENSMUSG00000019818][PH=7][PH0=0.28][P=6.9e-05]	7	+	3	ENSMUSG00000019818	Cd164	3'UTR	protein_coding	KNOWN	NA	NA
chr10	41529366	41529396	8791[gene=ENSMUSG00000019818][PH=12][PH0=0.28][P=2.0e-12]	12	+	5	ENSMUSG00000019818	Cd164	3'UTR	protein_coding	KNOWN	NA	NA
chr10	12383674	12383704	2046[gene=ENSMUSG00000019820][PH=22][PH0=0.06][P=1.0e-100]	22	-	5	ENSMUSG00000019820	Utrn	3'UTR	protein_coding	KNOWN	NA	NA
chr10	12383387	12383417	1978[gene=ENSMUSG00000019820][PH=47][PH0=0.06][P=1.0e-100]	47	-	5	ENSMUSG00000019820	Utrn	3'UTR	protein_coding	KNOWN	NA	NA
chr10	12383544	12383574	2007[gene=ENSMUSG00000019820][PH=10][PH0=0.06][P=1.0e-100]	10	-	2	ENSMUSG00000019820	Utrn	3'UTR	protein_coding	KNOWN	NA	NA
chr10	12382858	12382888	1896[gene=ENSMUSG00000019820][PH=33][PH0=0.06][P=1.0e-100]	33	-	5	ENSMUSG00000019820	Utrn	3'UTR	protein_coding	KNOWN	NA	NA
chr10	12538145	12538175	2451[gene=ENSMUSG00000019820][PH=9][PH0=0.06][P=1.0e-100]	9	-	4	ENSMUSG00000019820	Utrn	CDS	protein_coding	KNOWN	NA	NA
chr10	12382644	12382674	1862[gene=ENSMUSG00000019820][PH=5][PH0=0.06][P=4.4e-04]	5	-	4	ENSMUSG00000019820	Utrn	3'UTR	protein_coding	KNOWN	NA	NA
chr10	12383313	12383343	1942[gene=ENSMUSG00000019820][PH=7][PH0=0.06][P=5.6e-08]	7	-	3	ENSMUSG00000019820	Utrn	3'UTR	protein_coding	KNOWN	NA	NA
chr10	12383932	12383962	2087[gene=ENSMUSG00000019820][PH=11][PH0=0.06][P=1.0e-100]	11	-	4	ENSMUSG00000019820	Utrn	3'UTR	protein_coding	KNOWN	NA	NA
chr10	40035387	40035417	7880[gene=ENSMUSG00000019838][PH=6][PH0=0.01][P=1.6e-11]	6	-	4	ENSMUSG00000019838	Slc16a10	3'UTR	protein_coding	KNOWN	NA	NA
chr10	39565340	39565370	8123[gene=ENSMUSG00000019843][PH=10][PH0=0.15][P=8.8e-11]	10	+	3	ENSMUSG00000019843	Fyn	3'UTR	protein_coding	KNOWN	NA	NA
chr10	39564356	39564386	8027[gene=ENSMUSG00000019843][PH=9][PH0=0.15][P=5.2e-09]	9	+	5	ENSMUSG00000019843	Fyn	3'UTR	protein_coding	KNOWN	NA	NA
chr10	39564915	39564945	8069[gene=ENSMUSG00000019843][PH=16][PH0=0.15][P=1.0e-100]	16	+	5	ENSMUSG00000019843	Fyn	3'UTR	protein_coding	KNOWN	NA	NA
chr10	39402398	39402428	6761[gene=ENSMUSG00000019843][PH=8][PH0=0.15][P=2.7e-07]	8	+	5	ENSMUSG00000019843	Fyn	intron	protein_coding	KNOWN	NA	NA
chr10	19001903	19001933	5213[gene=ENSMUSG00000019850][PH=73][PH0=1.28][P=1.0e-100]	73	-	5	ENSMUSG00000019850	Tnfaip3	3'UTR	protein_coding	KNOWN	NA	NA
chr10	19001583	19001613	5062[gene=ENSMUSG00000019850][PH=12][PH0=1.28][P=7.6e-05]	12	-	5	ENSMUSG00000019850	Tnfaip3	3'UTR	protein_coding	KNOWN	NA	NA
chr10	19011712	19011742	5453[gene=ENSMUSG00000019850][PH=10][PH0=1.28][P=5.0e-03]	10	-	3	ENSMUSG00000019850	Tnfaip3	CDS	protein_coding	KNOWN	NA	NA
chr10	19001122	19001152	4979[gene=ENSMUSG00000019850][PH=10][PH0=1.28][P=5.0e-03]	10	-	5	ENSMUSG00000019850	Tnfaip3	3'UTR	protein_coding	KNOWN	NA	NA
chr10	19001274	19001304	5007[gene=ENSMUSG00000019850][PH=14][PH0=1.28][P=8.0e-07]	14	-	5	ENSMUSG00000019850	Tnfaip3	3'UTR	protein_coding	KNOWN	NA	NA
chr10	19001020	19001050	4923[gene=ENSMUSG00000019850][PH=140][PH0=1.28][P=1.0e-100]	140	-	5	ENSMUSG00000019850	Tnfaip3	3'UTR	protein_coding	KNOWN	NA	NA
chr10	19001739	19001769	5129[gene=ENSMUSG00000019850][PH=181][PH0=1.28][P=1.0e-100]	181	-	5	ENSMUSG00000019850	Tnfaip3	3'UTR	protein_coding	KNOWN	NA	NA
chr10	18125101	18125131	3772[gene=ENSMUSG00000019854][PH=6][PH0=0.04][P=3.2e-08]	6	+	2	ENSMUSG00000019854	Reps1	3'UTR	protein_coding	KNOWN	NA	NA
chr10	53608140	53608170	11699[gene=ENSMUSG00000019857][PH=6][PH0=0.07][P=4.4e-07]	6	+	3	ENSMUSG00000019857	Asf1a	3'UTR	protein_coding	KNOWN	NA	NA
chr10	52338411	52338441	8995[gene=ENSMUSG00000019861][PH=4][PH0=0.03][P=1.6e-04]	4	-	2	ENSMUSG00000019861	Gopc	3'UTR	protein_coding	KNOWN	NA	NA
chr10	43874191	43874221	8675[gene=ENSMUSG00000019863][PH=3][PH0=0.01][P=1.1e-03]	3	-	3	ENSMUSG00000019863	Qrsl1	3'UTR	protein_coding	KNOWN	NA	NA
chr10	43975124	43975154	8812[gene=ENSMUSG00000019866][PH=9][PH0=0.05][P=1.9e-13]	9	-	3	ENSMUSG00000019866	Aim1	CDS	protein_coding	KNOWN	NA	NA
chr10	43951165	43951195	8731[gene=ENSMUSG00000019866][PH=14][PH0=0.05][P=1.9e-13]	14	-	3	ENSMUSG00000019866	Aim1	3'UTR	protein_coding	KNOWN	NA	NA
chr10	57527670	57527700	10266[gene=ENSMUSG00000019877][PH=6][PH0=0.22][P=4.6e-04]	6	-	4	ENSMUSG00000019877	Serinc1	CDS	protein_coding	KNOWN	NA	NA
chr10	57515901	57515931	10115[gene=ENSMUSG00000019877][PH=21][PH0=0.22][P=1.0e-100]	21	-	5	ENSMUSG00000019877	Serinc1	3'UTR	protein_coding	KNOWN	NA	NA
chr10	57512233	57512263	11859[gene=ENSMUSG00000019878][PH=5][PH0=0.06][P=2.0e-05]	5	+	3	ENSMUSG00000019878	Hsf2	3'UTR	protein_coding	KNOWN	NA	NA
chr10	57512286	57512316	11871[gene=ENSMUSG00000019878][PH=7][PH0=0.06][P=2.0e-09]	7	+	3	ENSMUSG00000019878	Hsf2	3'UTR	protein_coding	KNOWN	NA	NA
chr10	105847744	105847774	23375[gene=ENSMUSG00000019897][PH=4][PH0=0.09][P=3.9e-03]	4	+	3	ENSMUSG00000019897	Ccdc59	3'UTR	protein_coding	KNOWN	NA	NA
chr10	105847724	105847754	23373[gene=ENSMUSG00000019897][PH=4][PH0=0.09][P=3.9e-03]	4	+	3	ENSMUSG00000019897	Ccdc59	3'UTR	protein_coding	KNOWN	NA	NA
chr10	105847315	105847345	23353[gene=ENSMUSG00000019897][PH=10][PH0=0.09][P=4.9e-14]	10	+	4	ENSMUSG00000019897	Ccdc59	3'UTR	protein_coding	KNOWN	NA	NA
chr10	108234033	108234063	23594[gene=ENSMUSG00000019907][PH=5][PH0=0.09][P=6.8e-04]	5	+	3	ENSMUSG00000019907	Ppp1r12a	CDS	protein_coding	KNOWN	NA	NA
chr10	59371913	59371943	12939[gene=ENSMUSG00000019916][PH=4][PH0=0.03][P=1.2e-04]	4	+	4	ENSMUSG00000019916	P4ha1	3'UTR	protein_coding	KNOWN	NA	NA
chr10	58424587	58424617	12414[gene=ENSMUSG00000019920][PH=7][PH0=0.06][P=8.8e-09]	7	+	3	ENSMUSG00000019920	Lims1	3'UTR	protein_coding	KNOWN	NA	NA
chr10	58424414	58424444	12400[gene=ENSMUSG00000019920][PH=4][PH0=0.06][P=5.3e-03]	4	+	2	ENSMUSG00000019920	Lims1	3'UTR	protein_coding	KNOWN	NA	NA
chr10	58423935	58423965	12383[gene=ENSMUSG00000019920][PH=8][PH0=0.06][P=7.4e-11]	8	+	4	ENSMUSG00000019920	Lims1	3'UTR	protein_coding	KNOWN	NA	NA
chr10	72660081	72660111	15069[gene=ENSMUSG00000019923][PH=6][PH0=0.06][P=3.7e-07]	6	+	4	ENSMUSG00000019923	Zwint	downstream 10K|intron	protein_coding	KNOWN	NA	NA
chr10	99023527	99023557	23002[gene=ENSMUSG00000019943][PH=5][PH0=0.06][P=1.4e-04]	5	+	3	ENSMUSG00000019943	Atp2b1	3'UTR	protein_coding	KNOWN	NA	NA
chr10	68239022	68239052	13644[gene=ENSMUSG00000019947][PH=5][PH0=0.10][P=2.3e-03]	5	-	2	ENSMUSG00000019947	Arid5b	intron	protein_coding	KNOWN	NA	NA
chr10	68276200	68276230	13892[gene=ENSMUSG00000019947][PH=5][PH0=0.10][P=2.3e-03]	5	-	3	ENSMUSG00000019947	Arid5b	intron	protein_coding	KNOWN	NA	NA
chr10	89711974	89712004	16962[gene=ENSMUSG00000019948][PH=3][PH0=0.02][P=1.7e-03]	3	-	2	ENSMUSG00000019948	Actr6	3'UTR	protein_coding	KNOWN	NA	NA
chr10	89818498	89818528	19899[gene=ENSMUSG00000019951][PH=6][PH0=0.04][P=1.4e-07]	6	+	4	ENSMUSG00000019951	Uhrf1bp1l	3'UTR	protein_coding	KNOWN	NA	NA
chr10	89818387	89818417	19887[gene=ENSMUSG00000019951][PH=4][PH0=0.04][P=1.4e-03]	4	+	3	ENSMUSG00000019951	Uhrf1bp1l	3'UTR	protein_coding	KNOWN	NA	NA
chr10	99197022	99197052	23089[gene=ENSMUSG00000019952][PH=4][PH0=0.01][P=4.6e-06]	4	+	4	ENSMUSG00000019952	Poc1b	3'UTR	protein_coding	KNOWN	NA	NA
chr10	99267197	99267227	23140[gene=ENSMUSG00000019960][PH=6][PH0=0.14][P=1.6e-05]	6	+	4	ENSMUSG00000019960	Dusp6	3'UTR	protein_coding	KNOWN	NA	NA
chr10	99267451	99267481	23174[gene=ENSMUSG00000019960][PH=16][PH0=0.14][P=4.2e-14]	16	+	3	ENSMUSG00000019960	Dusp6	3'UTR	protein_coding	KNOWN	NA	NA
chr10	91160767	91160797	17364[gene=ENSMUSG00000019961][PH=10][PH0=0.09][P=2.0e-13]	10	-	4	ENSMUSG00000019961	Tmpo	3'UTR|intron	protein_coding	KNOWN	NA	NA
chr10	91147737	91147767	17263[gene=ENSMUSG00000019961][PH=7][PH0=0.09][P=7.5e-08]	7	-	5	ENSMUSG00000019961	Tmpo	3'UTR	protein_coding	KNOWN	NA	NA
chr10	91148202	91148232	17292[gene=ENSMUSG00000019961][PH=5][PH0=0.09][P=2.5e-04]	5	-	3	ENSMUSG00000019961	Tmpo	3'UTR	protein_coding	KNOWN	NA	NA
chr10	91147776	91147806	17269[gene=ENSMUSG00000019961][PH=5][PH0=0.09][P=2.5e-04]	5	-	4	ENSMUSG00000019961	Tmpo	3'UTR	protein_coding	KNOWN	NA	NA
chr10	21300127	21300157	4693[gene=ENSMUSG00000098102][PH=3][PH0=0.04][P=9.5e-03]	3	+	2	ENSMUSG00000019977	Hbs1l	intron	protein_coding	KNOWN	NA	NA
chr10	25522494	25522524	5399[gene=ENSMUSG00000019978][PH=4][PH0=0.04][P=1.4e-03]	4	+	2	ENSMUSG00000019978	Epb4	3'UTR	protein_coding	KNOWN	NA	NA
chr10	25523475	25523505	5425[gene=ENSMUSG00000019978][PH=5][PH0=0.04][P=1.3e-05]	5	+	4	ENSMUSG00000019978	Epb4	3'UTR	protein_coding	KNOWN	NA	NA
chr10	90989341	90989371	17012[gene=ENSMUSG00000019979][PH=7][PH0=0.02][P=1.1e-11]	7	-	4	ENSMUSG00000019979	Apaf1	3'UTR	protein_coding	KNOWN	NA	NA
chr10	21125317	21125347	5702[gene=ENSMUSG00000019982][PH=11][PH0=0.15][P=1.4e-13]	11	-	5	ENSMUSG00000019982	Myb	3'UTR	protein_coding	KNOWN	NA	NA
chr10	21125490	21125520	5724[gene=ENSMUSG00000019982][PH=6][PH0=0.15][P=9.7e-05]	6	-	4	ENSMUSG00000019982	Myb	3'UTR	protein_coding	KNOWN	NA	NA
chr10	21125603	21125633	5738[gene=ENSMUSG00000019982][PH=5][PH0=0.15][P=3.2e-03]	5	-	3	ENSMUSG00000019982	Myb	3'UTR	protein_coding	KNOWN	NA	NA
chr10	24913122	24913152	5074[gene=ENSMUSG00000019984][PH=5][PH0=0.03][P=1.3e-06]	5	+	4	ENSMUSG00000019984	Med23	3'UTR	protein_coding	KNOWN	NA	NA
chr10	21079810	21079840	4642[gene=ENSMUSG00000019986][PH=8][PH0=0.02][P=1.0e-100]	8	+	5	ENSMUSG00000019986	Ahi1	3'UTR	protein_coding	KNOWN	NA	NA
chr10	21079189	21079219	4620[gene=ENSMUSG00000019986][PH=4][PH0=0.02][P=1.1e-04]	4	+	4	ENSMUSG00000019986	Ahi1	3'UTR	protein_coding	KNOWN	NA	NA
chr10	24188000	24188030	4980[gene=ENSMUSG00000019998][PH=4][PH0=0.02][P=1.1e-05]	4	+	3	ENSMUSG00000019998	Stx7	3'UTR	protein_coding	KNOWN	NA	NA
chr10	24188130	24188160	4987[gene=ENSMUSG00000019998][PH=3][PH0=0.02][P=2.3e-03]	3	+	2	ENSMUSG00000019998	Stx7	3'UTR	protein_coding	KNOWN	NA	NA
chr10	19610191	19610221	3934[gene=ENSMUSG00000020009][PH=5][PH0=0.06][P=2.0e-05]	5	+	3	ENSMUSG00000020009	Ifngr1	3'UTR	protein_coding	KNOWN	NA	NA
chr10	93240361	93240391	21071[gene=ENSMUSG00000020015][PH=13][PH0=0.36][P=6.1e-12]	13	+	5	ENSMUSG00000020015	Cdk17	3'UTR	protein_coding	KNOWN	NA	NA
chr10	93241083	93241113	21229[gene=ENSMUSG00000020015][PH=32][PH0=0.36][P=2.7e-13]	32	+	5	ENSMUSG00000020015	Cdk17	3'UTR	protein_coding	KNOWN	NA	NA
chr10	93233076	93233106	20843[gene=ENSMUSG00000020015][PH=8][PH0=0.36][P=9.1e-05]	8	+	4	ENSMUSG00000020015	Cdk17	intron	protein_coding	KNOWN	NA	NA
chr10	93239931	93239961	20940[gene=ENSMUSG00000020015][PH=42][PH0=0.36][P=2.7e-13]	42	+	5	ENSMUSG00000020015	Cdk17	3'UTR	protein_coding	KNOWN	NA	NA
chr10	93241012	93241042	21188[gene=ENSMUSG00000020015][PH=58][PH0=0.36][P=2.7e-13]	58	+	5	ENSMUSG00000020015	Cdk17	3'UTR	protein_coding	KNOWN	NA	NA
chr10	93241299	93241329	21274[gene=ENSMUSG00000020015][PH=17][PH0=0.36][P=2.7e-13]	17	+	4	ENSMUSG00000020015	Cdk17	3'UTR	protein_coding	KNOWN	NA	NA
chr10	93240446	93240476	21096[gene=ENSMUSG00000020015][PH=17][PH0=0.36][P=2.7e-13]	17	+	5	ENSMUSG00000020015	Cdk17	3'UTR	protein_coding	KNOWN	NA	NA
chr10	93239833	93239863	20916[gene=ENSMUSG00000020015][PH=8][PH0=0.36][P=9.1e-05]	8	+	2	ENSMUSG00000020015	Cdk17	3'UTR	protein_coding	KNOWN	NA	NA
chr10	93240101	93240131	21004[gene=ENSMUSG00000020015][PH=43][PH0=0.36][P=2.7e-13]	43	+	5	ENSMUSG00000020015	Cdk17	3'UTR	protein_coding	KNOWN	NA	NA
chr10	93165059	93165089	20081[gene=ENSMUSG00000020015][PH=8][PH0=0.36][P=9.1e-05]	8	+	4	ENSMUSG00000020015	Cdk17	intron	protein_coding	KNOWN	NA	NA
chr10	93583405	93583435	17698[gene=ENSMUSG00000020018][PH=19][PH0=0.07][P=1.0e-100]	19	-	4	ENSMUSG00000020018	Snrpf	3'UTR	protein_coding	KNOWN	NA	NA
chr10	94790299	94790329	21852[gene=ENSMUSG00000020024][PH=4][PH0=0.03][P=4.1e-04]	4	+	3	ENSMUSG00000020024	Ccdc41	3'UTR	protein_coding	KNOWN	NA	NA
chr10	94790244	94790274	21848[gene=ENSMUSG00000020024][PH=4][PH0=0.03][P=4.1e-04]	4	+	3	ENSMUSG00000020024	Ccdc41	3'UTR	protein_coding	KNOWN	NA	NA
chr10	94721756	94721786	21752[gene=ENSMUSG00000020024][PH=6][PH0=0.03][P=1.9e-08]	6	+	3	ENSMUSG00000020024	Ccdc41	intron	protein_coding	KNOWN	NA	NA
chr10	85132011	85132041	16192[gene=ENSMUSG00000020038][PH=7][PH0=0.04][P=4.9e-10]	7	-	3	ENSMUSG00000020038	Cry1	3'UTR	protein_coding	KNOWN	NA	NA
chr10	85132037	85132067	16200[gene=ENSMUSG00000020038][PH=4][PH0=0.04][P=8.0e-04]	4	-	3	ENSMUSG00000020038	Cry1	3'UTR	protein_coding	KNOWN	NA	NA
chr10	85132206	85132236	16219[gene=ENSMUSG00000020038][PH=15][PH0=0.04][P=1.0e-100]	15	-	4	ENSMUSG00000020038	Cry1	3'UTR	protein_coding	KNOWN	NA	NA
chr10	85398966	85398996	19018[gene=ENSMUSG00000020042][PH=4][PH0=0.01][P=3.2e-05]	4	+	3	ENSMUSG00000020042	Btbd11	intron	protein_coding	KNOWN	NA	NA
chr10	63319358	63319388	12455[gene=ENSMUSG00000020063][PH=6][PH0=0.03][P=1.4e-08]	6	-	3	ENSMUSG00000020063	Sirt1	3'UTR	protein_coding	KNOWN	NA	NA
chr10	63320494	63320524	12499[gene=ENSMUSG00000020063][PH=6][PH0=0.03][P=1.4e-08]	6	-	3	ENSMUSG00000020063	Sirt1	3'UTR	protein_coding	KNOWN	NA	NA
chr10	62765580	62765610	12261[gene=ENSMUSG00000020074][PH=49][PH0=0.09][P=1.0e-100]	49	-	5	ENSMUSG00000020074	Ccar1	intron	protein_coding	KNOWN	NA	NA
chr10	62744324	62744354	12183[gene=ENSMUSG00000020074][PH=6][PH0=0.09][P=4.9e-06]	6	-	3	ENSMUSG00000020074	Ccar1	3'UTR	protein_coding	KNOWN	NA	NA
chr10	62580924	62580954	11867[gene=ENSMUSG00000020075][PH=6][PH0=0.21][P=5.2e-04]	6	-	3	ENSMUSG00000020075	Ddx21	3'UTR	protein_coding	KNOWN	NA	NA
chr10	62580966	62580996	11874[gene=ENSMUSG00000020075][PH=6][PH0=0.21][P=5.2e-04]	6	-	4	ENSMUSG00000020075	Ddx21	3'UTR	protein_coding	KNOWN	NA	NA
chr10	62580383	62580413	11759[gene=ENSMUSG00000020075][PH=7][PH0=0.21][P=1.8e-05]	7	-	4	ENSMUSG00000020075	Ddx21	3'UTR	protein_coding	KNOWN	NA	NA
chr10	62580279	62580309	11741[gene=ENSMUSG00000020075][PH=7][PH0=0.21][P=1.8e-05]	7	-	3	ENSMUSG00000020075	Ddx21	3'UTR	protein_coding	KNOWN	NA	NA
chr10	62580841	62580871	11856[gene=ENSMUSG00000020075][PH=7][PH0=0.21][P=1.8e-05]	7	-	5	ENSMUSG00000020075	Ddx21	3'UTR	protein_coding	KNOWN	NA	NA
chr10	62587486	62587516	11948[gene=ENSMUSG00000020075][PH=8][PH0=0.21][P=5.6e-07]	8	-	5	ENSMUSG00000020075	Ddx21	CDS	protein_coding	KNOWN	NA	NA
chr10	62581486	62581516	11900[gene=ENSMUSG00000020075][PH=6][PH0=0.21][P=5.2e-04]	6	-	4	ENSMUSG00000020075	Ddx21	3'UTR	protein_coding	KNOWN	NA	NA
chr10	62580531	62580561	11811[gene=ENSMUSG00000020075][PH=6][PH0=0.21][P=5.2e-04]	6	-	3	ENSMUSG00000020075	Ddx21	3'UTR	protein_coding	KNOWN	NA	NA
chr10	62580465	62580495	11785[gene=ENSMUSG00000020075][PH=30][PH0=0.21][P=1.0e-100]	30	-	5	ENSMUSG00000020075	Ddx21	3'UTR	protein_coding	KNOWN	NA	NA
chr10	62580736	62580766	11841[gene=ENSMUSG00000020075][PH=9][PH0=0.21][P=1.5e-08]	9	-	4	ENSMUSG00000020075	Ddx21	3'UTR	protein_coding	KNOWN	NA	NA
chr10	62580255	62580285	11738[gene=ENSMUSG00000020075][PH=6][PH0=0.21][P=5.2e-04]	6	-	2	ENSMUSG00000020075	Ddx21	3'UTR	protein_coding	KNOWN	NA	NA
chr10	62650111	62650141	12151[gene=ENSMUSG00000036923][PH=3][PH0=0.00][P=6.1e-05]	3	-	2	ENSMUSG00000020076	Ddx50	downstream 10K|intron	protein_coding	KNOWN	NA	NA
chr10	62494890	62494920	11496[gene=ENSMUSG00000020077][PH=36][PH0=0.47][P=1.3e-13]	36	-	5	ENSMUSG00000020077	Srgn	CDS	protein_coding	KNOWN	NA	NA
chr10	62494577	62494607	11350[gene=ENSMUSG00000020077][PH=102][PH0=0.47][P=1.3e-13]	102	-	5	ENSMUSG00000020077	Srgn	3'UTR	protein_coding	KNOWN	NA	NA
chr10	62497787	62497817	11560[gene=ENSMUSG00000020077][PH=8][PH0=0.47][P=3.0e-04]	8	-	3	ENSMUSG00000020077	Srgn	CDS	protein_coding	KNOWN	NA	NA
chr10	62495052	62495082	11535[gene=ENSMUSG00000020077][PH=7][PH0=0.47][P=4.4e-03]	7	-	4	ENSMUSG00000020077	Srgn	CDS	protein_coding	KNOWN	NA	NA
chr10	62493855	62493885	11204[gene=ENSMUSG00000020077][PH=23][PH0=0.47][P=1.3e-13]	23	-	4	ENSMUSG00000020077	Srgn	3'UTR	protein_coding	KNOWN	NA	NA
chr10	61691824	61691854	13623[gene=ENSMUSG00000020088][PH=4][PH0=0.10][P=7.4e-03]	4	+	3	ENSMUSG00000020088	Sar1a	3'UTR	protein_coding	KNOWN	NA	NA
chr10	61692107	61692137	13634[gene=ENSMUSG00000020088][PH=5][PH0=0.10][P=1.8e-04]	5	+	3	ENSMUSG00000020088	Sar1a	3'UTR	protein_coding	KNOWN	NA	NA
chr10	61692470	61692500	13656[gene=ENSMUSG00000020088][PH=10][PH0=0.10][P=6.8e-14]	10	+	3	ENSMUSG00000020088	Sar1a	3'UTR	protein_coding	KNOWN	NA	NA
chr10	61691864	61691894	13625[gene=ENSMUSG00000020088][PH=4][PH0=0.10][P=7.4e-03]	4	+	2	ENSMUSG00000020088	Sar1a	3'UTR	protein_coding	KNOWN	NA	NA
chr10	61674053	61674083	13568[gene=ENSMUSG00000020089][PH=4][PH0=0.03][P=1.8e-04]	4	+	3	ENSMUSG00000020089	Ppa1	3'UTR	protein_coding	KNOWN	NA	NA
chr10	61100277	61100307	10794[gene=ENSMUSG00000020097][PH=6][PH0=0.03][P=1.0e-08]	6	-	3	ENSMUSG00000020097	Sgpl1	3'UTR	protein_coding	KNOWN	NA	NA
chr10	60743332	60743362	10761[gene=ENSMUSG00000020100][PH=3][PH0=0.02][P=4.7e-03]	3	-	2	ENSMUSG00000020100	Slc29a3	intron	protein_coding	KNOWN	NA	NA
chr10	60372562	60372592	13420[gene=ENSMUSG00000020101][PH=6][PH0=0.18][P=2.3e-04]	6	+	2	ENSMUSG00000020101	4632428N05Rik	3'UTR	protein_coding	KNOWN	NA	NA
chr10	60372506	60372536	13397[gene=ENSMUSG00000020101][PH=27][PH0=0.18][P=1.1e-13]	27	+	5	ENSMUSG00000020101	4632428N05Rik	3'UTR	protein_coding	KNOWN	NA	NA
chr10	59950197	59950227	10676[gene=ENSMUSG00000020108][PH=14][PH0=0.06][P=1.0e-100]	14	-	5	ENSMUSG00000020108	Ddit4	3'UTR	protein_coding	KNOWN	NA	NA
chr10	59897556	59897586	13056[gene=ENSMUSG00000020109][PH=4][PH0=0.03][P=1.1e-04]	4	+	2	ENSMUSG00000020109	Dnajb12	3'UTR	protein_coding	KNOWN	NA	NA
chr10	59897956	59897986	13066[gene=ENSMUSG00000020109][PH=8][PH0=0.03][P=1.7e-13]	8	+	3	ENSMUSG00000020109	Dnajb12	3'UTR	protein_coding	KNOWN	NA	NA
chr10	119200706	119200736	22160[gene=ENSMUSG00000020114][PH=7][PH0=0.05][P=2.4e-09]	7	-	3	ENSMUSG00000020114	Cand1	3'UTR	protein_coding	KNOWN	NA	NA
chr10	121546943	121546973	22859[gene=ENSMUSG00000020115][PH=5][PH0=0.05][P=1.4e-05]	5	-	3	ENSMUSG00000020115	Tbk1	3'UTR	protein_coding	KNOWN	NA	NA
chr10	121546470	121546500	22841[gene=ENSMUSG00000020115][PH=5][PH0=0.05][P=1.4e-05]	5	-	3	ENSMUSG00000020115	Tbk1	3'UTR	protein_coding	KNOWN	NA	NA
chr11	17203746	17203776	3312[gene=ENSMUSG00000020116][PH=15][PH0=0.09][P=5.4e-14]	15	-	5	ENSMUSG00000020116	Pno1	3'UTR	protein_coding	KNOWN	NA	NA
chr11	21320557	21320587	5797[gene=ENSMUSG00000020128][PH=4][PH0=0.06][P=5.0e-03]	4	+	2	ENSMUSG00000020128	Vps54	3'UTR	protein_coding	KNOWN	NA	NA
chr11	21255926	21255956	5585[gene=ENSMUSG00000020128][PH=4][PH0=0.06][P=5.0e-03]	4	+	2	ENSMUSG00000020128	Vps54	intron	protein_coding	KNOWN	NA	NA
chr10	115199014	115199044	19134[gene=ENSMUSG00000020130][PH=5][PH0=0.06][P=5.3e-05]	5	-	2	ENSMUSG00000020130	Tbc1d15	3'UTR	protein_coding	KNOWN	NA	NA
chr10	115198902	115198932	19121[gene=ENSMUSG00000020130][PH=8][PH0=0.06][P=5.6e-11]	8	-	3	ENSMUSG00000020130	Tbc1d15	3'UTR	protein_coding	KNOWN	NA	NA
chr10	115199432	115199462	19153[gene=ENSMUSG00000020130][PH=5][PH0=0.06][P=5.3e-05]	5	-	3	ENSMUSG00000020130	Tbc1d15	3'UTR	protein_coding	KNOWN	NA	NA
chr10	115290225	115290255	19342[gene=ENSMUSG00000020132][PH=6][PH0=0.16][P=1.2e-04]	6	-	4	ENSMUSG00000020132	Rab21	3'UTR	protein_coding	KNOWN	NA	NA
chr10	115290419	115290449	19376[gene=ENSMUSG00000020132][PH=37][PH0=0.16][P=1.1e-13]	37	-	5	ENSMUSG00000020132	Rab21	3'UTR	protein_coding	KNOWN	NA	NA
chr11	21150064	21150094	5437[gene=ENSMUSG00000020134][PH=11][PH0=0.27][P=2.4e-10]	11	+	4	ENSMUSG00000020134	Peli1	3'UTR	protein_coding	KNOWN	NA	NA
chr11	21148983	21149013	5349[gene=ENSMUSG00000020134][PH=6][PH0=0.27][P=4.6e-03]	6	+	3	ENSMUSG00000020134	Peli1	3'UTR|intron	protein_coding	KNOWN	NA	NA
chr11	21149541	21149571	5388[gene=ENSMUSG00000020134][PH=7][PH0=0.27][P=2.1e-04]	7	+	3	ENSMUSG00000020134	Peli1	3'UTR	protein_coding	KNOWN	NA	NA
chr11	21148941	21148971	5334[gene=ENSMUSG00000020134][PH=22][PH0=0.27][P=2.0e-13]	22	+	5	ENSMUSG00000020134	Peli1	3'UTR|intron	protein_coding	KNOWN	NA	NA
chr11	21150290	21150320	5476[gene=ENSMUSG00000020134][PH=67][PH0=0.27][P=2.0e-13]	67	+	5	ENSMUSG00000020134	Peli1	3'UTR	protein_coding	KNOWN	NA	NA
chr11	21149961	21149991	5407[gene=ENSMUSG00000020134][PH=16][PH0=0.27][P=2.0e-13]	16	+	4	ENSMUSG00000020134	Peli1	3'UTR	protein_coding	KNOWN	NA	NA
chr11	21148650	21148680	5280[gene=ENSMUSG00000020134][PH=36][PH0=0.27][P=2.0e-13]	36	+	5	ENSMUSG00000020134	Peli1	3'UTR|intron	protein_coding	KNOWN	NA	NA
chr11	34227204	34227234	7490[gene=ENSMUSG00000020143][PH=5][PH0=0.07][P=9.3e-04]	5	-	2	ENSMUSG00000020143	Dock2	3'UTR	protein_coding	KNOWN	NA	NA
chr11	34544731	34544761	9081[gene=ENSMUSG00000020143][PH=5][PH0=0.07][P=9.3e-04]	5	-	3	ENSMUSG00000020143	Dock2	intron	protein_coding	KNOWN	NA	NA
chr11	34400648	34400678	8332[gene=ENSMUSG00000020143][PH=8][PH0=0.07][P=1.5e-09]	8	-	3	ENSMUSG00000020143	Dock2	intron	protein_coding	KNOWN	NA	NA
chr11	34682208	34682238	9161[gene=ENSMUSG00000020143][PH=6][PH0=0.07][P=1.3e-05]	6	-	4	ENSMUSG00000020143	Dock2	intron	protein_coding	KNOWN	NA	NA
chr11	34682133	34682163	9148[gene=ENSMUSG00000020143][PH=7][PH0=0.07][P=1.5e-07]	7	-	4	ENSMUSG00000020143	Dock2	intron	protein_coding	KNOWN	NA	NA
chr11	34544835	34544865	9097[gene=ENSMUSG00000020143][PH=14][PH0=0.07][P=1.0e-100]	14	-	4	ENSMUSG00000020143	Dock2	intron	protein_coding	KNOWN	NA	NA
chr11	34681903	34681933	9125[gene=ENSMUSG00000020143][PH=5][PH0=0.07][P=9.3e-04]	5	-	3	ENSMUSG00000020143	Dock2	intron	protein_coding	KNOWN	NA	NA
chr11	34227234	34227264	7495[gene=ENSMUSG00000020143][PH=5][PH0=0.07][P=9.3e-04]	5	-	3	ENSMUSG00000020143	Dock2	3'UTR	protein_coding	KNOWN	NA	NA
chr11	20215640	20215670	4247[gene=ENSMUSG00000020149][PH=14][PH0=0.08][P=1.0e-100]	14	+	5	ENSMUSG00000020149	Rab1	CDS	protein_coding	KNOWN	NA	NA
chr11	20062669	20062699	3510[gene=ENSMUSG00000020152][PH=20][PH0=0.12][P=1.8e-13]	20	-	4	ENSMUSG00000020152	Actr2	3'UTR	protein_coding	KNOWN	NA	NA
chr11	20062381	20062411	3455[gene=ENSMUSG00000020152][PH=6][PH0=0.12][P=2.9e-05]	6	-	4	ENSMUSG00000020152	Actr2	3'UTR	protein_coding	KNOWN	NA	NA
chr11	20062316	20062346	3444[gene=ENSMUSG00000020152][PH=5][PH0=0.12][P=1.2e-03]	5	-	2	ENSMUSG00000020152	Actr2	3'UTR	protein_coding	KNOWN	NA	NA
chr11	20062466	20062496	3473[gene=ENSMUSG00000020152][PH=10][PH0=0.12][P=2.0e-12]	10	-	5	ENSMUSG00000020152	Actr2	3'UTR	protein_coding	KNOWN	NA	NA
chr10	80249221	80249251	16575[gene=ENSMUSG00000020156][PH=17][PH0=0.05][P=8.1e-14]	17	+	2	ENSMUSG00000020153	Ndufs7	downstream 10K|intron	protein_coding	KNOWN	NA	tRNA-Asn-AAC
chr10	117072634	117072664	20552[gene=ENSMUSG00000020170][PH=5][PH0=0.07][P=1.2e-04]	5	-	4	ENSMUSG00000020170	Frs2	3'UTR	protein_coding	KNOWN	NA	NA
chr10	117072915	117072945	20566[gene=ENSMUSG00000020170][PH=4][PH0=0.07][P=7.1e-03]	4	-	3	ENSMUSG00000020170	Frs2	3'UTR	protein_coding	KNOWN	NA	NA
chr10	117070884	117070914	20531[gene=ENSMUSG00000020170][PH=4][PH0=0.07][P=7.1e-03]	4	-	3	ENSMUSG00000020170	Frs2	3'UTR	protein_coding	KNOWN	NA	NA
chr10	75532229	75532259	15491[gene=ENSMUSG00000020180][PH=5][PH0=0.06][P=2.1e-05]	5	+	2	ENSMUSG00000020180	Snrpd3	CDS	protein_coding	KNOWN	NA	NA
chr10	75535417	75535447	15508[gene=ENSMUSG00000020180][PH=8][PH0=0.06][P=2.0e-11]	8	+	5	ENSMUSG00000020180	Snrpd3	3'UTR	protein_coding	KNOWN	NA	NA
chr10	75518080	75518110	15444[gene=ENSMUSG00000020180][PH=4][PH0=0.06][P=1.4e-03]	4	+	1	ENSMUSG00000020180	Snrpd3	5'UTR	protein_coding	KNOWN	NA	NA
chr10	117686158	117686188	25528[gene=ENSMUSG00000020183][PH=3][PH0=0.01][P=2.7e-03]	3	+	3	ENSMUSG00000020183	Cpm	3'UTR	protein_coding	KNOWN	NA	NA
chr10	117690059	117690089	21282[gene=ENSMUSG00000020184][PH=5][PH0=0.17][P=3.9e-03]	5	-	3	ENSMUSG00000020184	Mdm2	3'UTR	protein_coding	KNOWN	NA	NA
chr10	117689726	117689756	21212[gene=ENSMUSG00000020184][PH=25][PH0=0.17][P=1.0e-100]	25	-	5	ENSMUSG00000020184	Mdm2	3'UTR	protein_coding	KNOWN	NA	NA
chr10	117689936	117689966	21266[gene=ENSMUSG00000020184][PH=11][PH0=0.17][P=4.7e-13]	11	-	4	ENSMUSG00000020184	Mdm2	3'UTR	protein_coding	KNOWN	NA	NA
chr10	117690091	117690121	21291[gene=ENSMUSG00000020184][PH=8][PH0=0.17][P=8.9e-08]	8	-	5	ENSMUSG00000020184	Mdm2	3'UTR	protein_coding	KNOWN	NA	NA
chr10	117688896	117688926	21161[gene=ENSMUSG00000020184][PH=24][PH0=0.17][P=1.0e-100]	24	-	5	ENSMUSG00000020184	Mdm2	3'UTR	protein_coding	KNOWN	NA	NA
chr10	117689578	117689608	21184[gene=ENSMUSG00000020184][PH=5][PH0=0.17][P=3.9e-03]	5	-	2	ENSMUSG00000020184	Mdm2	3'UTR	protein_coding	KNOWN	NA	NA
chr10	111293234	111293264	24380[gene=ENSMUSG00000020189][PH=5][PH0=0.09][P=1.0e-03]	5	+	4	ENSMUSG00000020189	Osbpl8	3'UTR	protein_coding	KNOWN	NA	NA
chr10	111294061	111294091	24447[gene=ENSMUSG00000020189][PH=5][PH0=0.09][P=1.0e-03]	5	+	4	ENSMUSG00000020189	Osbpl8	3'UTR	protein_coding	KNOWN	NA	NA
chr10	111294871	111294901	24530[gene=ENSMUSG00000020189][PH=14][PH0=0.09][P=1.0e-100]	14	+	5	ENSMUSG00000020189	Osbpl8	3'UTR	protein_coding	KNOWN	NA	NA
chr10	111293901	111293931	24427[gene=ENSMUSG00000020189][PH=11][PH0=0.09][P=1.0e-100]	11	+	5	ENSMUSG00000020189	Osbpl8	3'UTR	protein_coding	KNOWN	NA	NA
chr10	111294453	111294483	24499[gene=ENSMUSG00000020189][PH=6][PH0=0.09][P=1.9e-05]	6	+	4	ENSMUSG00000020189	Osbpl8	3'UTR	protein_coding	KNOWN	NA	NA
chr10	111295342	111295372	24577[gene=ENSMUSG00000020189][PH=5][PH0=0.09][P=1.0e-03]	5	+	3	ENSMUSG00000020189	Osbpl8	3'UTR	protein_coding	KNOWN	NA	NA
chr10	111293782	111293812	24405[gene=ENSMUSG00000020189][PH=5][PH0=0.09][P=1.0e-03]	5	+	4	ENSMUSG00000020189	Osbpl8	3'UTR	protein_coding	KNOWN	NA	NA
chr10	111297134	111297164	24649[gene=ENSMUSG00000020189][PH=5][PH0=0.09][P=1.0e-03]	5	+	4	ENSMUSG00000020189	Osbpl8	3'UTR	protein_coding	KNOWN	NA	NA
chr10	111294356	111294386	24472[gene=ENSMUSG00000020189][PH=32][PH0=0.09][P=1.0e-100]	32	+	5	ENSMUSG00000020189	Osbpl8	3'UTR	protein_coding	KNOWN	NA	NA
chr10	80665880	80665910	15527[gene=ENSMUSG00000020190][PH=3][PH0=0.03][P=8.2e-03]	3	-	3	ENSMUSG00000020190	Mknk2	3'UTR	protein_coding	KNOWN	NA	NA
chr10	111508481	111508511	24947[gene=ENSMUSG00000020205][PH=6][PH0=0.32][P=1.9e-03]	6	+	3	ENSMUSG00000020205	Phlda1	3'UTR	protein_coding	KNOWN	NA	NA
chr10	111508406	111508436	24917[gene=ENSMUSG00000020205][PH=33][PH0=0.32][P=3.6e-14]	33	+	4	ENSMUSG00000020205	Phlda1	3'UTR	protein_coding	KNOWN	NA	NA
chr10	111508268	111508298	24846[gene=ENSMUSG00000020205][PH=24][PH0=0.32][P=3.6e-14]	24	+	5	ENSMUSG00000020205	Phlda1	3'UTR	protein_coding	KNOWN	NA	NA
chr10	80801464	80801494	17062[gene=ENSMUSG00000061589][PH=12][PH0=0.15][P=1.5e-13]	12	+	4	ENSMUSG00000020211	Sf3a2	CDS|downstream 10K	protein_coding	KNOWN	NA	NA
chr4	144974876	144974906	23072[gene=ENSMUSG00000020220][PH=4][PH0=0.02][P=7.3e-05]	4	-	2	ENSMUSG00000020220	Vps13d	3'UTR	protein_coding	KNOWN	NA	NA
chr10	120232038	120232068	25684[gene=ENSMUSG00000020224][PH=2][PH0=0.01][P=9.9e-03]	2	+	2	ENSMUSG00000020224	Llph	3'UTR	protein_coding	KNOWN	NA	NA
chr10	120095159	120095189	22313[gene=ENSMUSG00000020228][PH=3][PH0=0.01][P=1.2e-03]	3	-	3	ENSMUSG00000020228	Helb	3'UTR|CDS	protein_coding	KNOWN	NA	NA
chr10	76607801	76607831	14514[gene=ENSMUSG00000020241][PH=2][PH0=0.00][P=4.0e-03]	2	-	1	ENSMUSG00000020241	Col6a2	intron	protein_coding	KNOWN	NA	NA
chr10	82739322	82739352	17801[gene=ENSMUSG00000020246][PH=3][PH0=0.01][P=2.0e-03]	3	+	3	ENSMUSG00000020246	Hcfc2	3'UTR|intron	protein_coding	KNOWN	NA	NA
chr10	82749810	82749840	15957[gene=ENSMUSG00000020248][PH=6][PH0=0.09][P=2.8e-06]	6	-	3	ENSMUSG00000020248	Nfyb	3'UTR	protein_coding	KNOWN	NA	NA
chr10	82749858	82749888	15967[gene=ENSMUSG00000020248][PH=4][PH0=0.09][P=6.7e-03]	4	-	2	ENSMUSG00000020248	Nfyb	3'UTR	protein_coding	KNOWN	NA	NA
chr10	82750054	82750084	15990[gene=ENSMUSG00000020248][PH=11][PH0=0.09][P=7.5e-14]	11	-	5	ENSMUSG00000020248	Nfyb	3'UTR	protein_coding	KNOWN	NA	NA
chr10	82897496	82897526	18049[gene=ENSMUSG00000020250][PH=23][PH0=0.14][P=1.4e-13]	23	+	4	ENSMUSG00000020250	Txnrd1	3'UTR	protein_coding	KNOWN	NA	NA
chr10	82897660	82897690	18094[gene=ENSMUSG00000020250][PH=10][PH0=0.14][P=6.8e-12]	10	+	5	ENSMUSG00000020250	Txnrd1	3'UTR	protein_coding	KNOWN	NA	NA
chr10	82897604	82897634	18082[gene=ENSMUSG00000020250][PH=5][PH0=0.14][P=2.1e-03]	5	+	3	ENSMUSG00000020250	Txnrd1	3'UTR	protein_coding	KNOWN	NA	NA
chr10	82896992	82897022	17993[gene=ENSMUSG00000020250][PH=32][PH0=0.14][P=1.4e-13]	32	+	5	ENSMUSG00000020250	Txnrd1	3'UTR	protein_coding	KNOWN	NA	NA
chr10	82896637	82896667	17950[gene=ENSMUSG00000020250][PH=5][PH0=0.14][P=2.1e-03]	5	+	3	ENSMUSG00000020250	Txnrd1	3'UTR	protein_coding	KNOWN	NA	NA
chr9	106190905	106190935	23490[gene=ENSMUSG00000020257][PH=6][PH0=0.13][P=2.4e-05]	6	+	2	ENSMUSG00000020257	Wdr82	3'UTR	protein_coding	KNOWN	NA	NA
chr9	106178841	106178871	23375[gene=ENSMUSG00000020257][PH=6][PH0=0.13][P=2.4e-05]	6	+	5	ENSMUSG00000020257	Wdr82	intron	protein_coding	KNOWN	NA	NA
chr9	106188650	106188680	23420[gene=ENSMUSG00000020257][PH=15][PH0=0.13][P=9.0e-14]	15	+	4	ENSMUSG00000020257	Wdr82	3'UTR	protein_coding	KNOWN	NA	NA
chr9	106189654	106189684	23454[gene=ENSMUSG00000020257][PH=8][PH0=0.13][P=9.1e-09]	8	+	4	ENSMUSG00000020257	Wdr82	3'UTR	protein_coding	KNOWN	NA	NA
chr10	77269532	77269562	15746[gene=ENSMUSG00000020260][PH=14][PH0=0.03][P=6.0e-14]	14	+	4	ENSMUSG00000020260	Pofut2	3'UTR	protein_coding	KNOWN	NA	NA
chr11	54870430	54870460	15333[gene=ENSMUSG00000020267][PH=3][PH0=0.02][P=2.5e-03]	3	+	2	ENSMUSG00000020267	Hint1	3'UTR	protein_coding	KNOWN	NA	NA
chr11	32745210	32745240	8982[gene=ENSMUSG00000020271][PH=16][PH0=0.08][P=3.4e-13]	16	+	5	ENSMUSG00000020271	Fbxw11	3'UTR	protein_coding	KNOWN	NA	NA
chr11	32746622	32746652	9055[gene=ENSMUSG00000020271][PH=7][PH0=0.08][P=9.0e-08]	7	+	4	ENSMUSG00000020271	Fbxw11	3'UTR	protein_coding	KNOWN	NA	NA
chr11	32648696	32648726	8632[gene=ENSMUSG00000020271][PH=7][PH0=0.08][P=9.0e-08]	7	+	3	ENSMUSG00000020271	Fbxw11	intron	protein_coding	KNOWN	NA	NA
chr11	32746479	32746509	9037[gene=ENSMUSG00000020271][PH=5][PH0=0.08][P=4.1e-04]	5	+	3	ENSMUSG00000020271	Fbxw11	3'UTR	protein_coding	KNOWN	NA	NA
chr11	32624522	32624552	8580[gene=ENSMUSG00000020272][PH=5][PH0=0.02][P=6.6e-07]	5	+	4	ENSMUSG00000020272	Stk10	3'UTR	protein_coding	KNOWN	NA	NA
chr11	32624562	32624592	8589[gene=ENSMUSG00000020272][PH=4][PH0=0.02][P=1.2e-04]	4	+	4	ENSMUSG00000020272	Stk10	3'UTR	protein_coding	KNOWN	NA	NA
chr11	23863347	23863377	6447[gene=ENSMUSG00000020273][PH=13][PH0=0.08][P=1.3e-13]	13	-	4	ENSMUSG00000020273	Papolg	3'UTR	protein_coding	KNOWN	NA	NA
chr11	23863538	23863568	6468[gene=ENSMUSG00000020273][PH=4][PH0=0.08][P=6.3e-03]	4	-	3	ENSMUSG00000020273	Papolg	3'UTR	protein_coding	KNOWN	NA	NA
chr11	23862658	23862688	6413[gene=ENSMUSG00000020273][PH=7][PH0=0.08][P=2.5e-08]	7	-	3	ENSMUSG00000020273	Papolg	3'UTR	protein_coding	KNOWN	NA	NA
chr11	23891782	23891812	6525[gene=ENSMUSG00000020273][PH=6][PH0=0.08][P=1.9e-06]	6	-	5	ENSMUSG00000020273	Papolg	CDS	protein_coding	KNOWN	NA	NA
chr11	23742216	23742246	5978[gene=ENSMUSG00000020275][PH=15][PH0=0.65][P=1.0e-11]	15	-	4	ENSMUSG00000020275	Rel	3'UTR	protein_coding	KNOWN	NA	NA
chr11	23741630	23741660	5821[gene=ENSMUSG00000020275][PH=12][PH0=0.65][P=7.9e-08]	12	-	4	ENSMUSG00000020275	Rel	3'UTR	protein_coding	KNOWN	NA	NA
chr11	23742072	23742102	5939[gene=ENSMUSG00000020275][PH=12][PH0=0.65][P=7.9e-08]	12	-	4	ENSMUSG00000020275	Rel	3'UTR	protein_coding	KNOWN	NA	NA
chr11	23741851	23741881	5865[gene=ENSMUSG00000020275][PH=38][PH0=0.65][P=1.2e-13]	38	-	5	ENSMUSG00000020275	Rel	3'UTR	protein_coding	KNOWN	NA	NA
chr11	23741978	23742008	5903[gene=ENSMUSG00000020275][PH=15][PH0=0.65][P=1.0e-11]	15	-	4	ENSMUSG00000020275	Rel	3'UTR	protein_coding	KNOWN	NA	NA
chr11	23768616	23768646	6356[gene=ENSMUSG00000087741][PH=4][PH0=0.10][P=4.0e-03]	4	-	3	ENSMUSG00000020275	Rel	intron	protein_coding	KNOWN	NA	NA
chr11	23741595	23741625	5807[gene=ENSMUSG00000020275][PH=9][PH0=0.65][P=2.7e-04]	9	-	3	ENSMUSG00000020275	Rel	3'UTR	protein_coding	KNOWN	NA	NA
chr11	23741905	23741935	5887[gene=ENSMUSG00000020275][PH=9][PH0=0.65][P=2.7e-04]	9	-	3	ENSMUSG00000020275	Rel	3'UTR	protein_coding	KNOWN	NA	NA
chr11	23490268	23490298	5193[gene=ENSMUSG00000020288][PH=5][PH0=0.04][P=1.6e-06]	5	-	2	ENSMUSG00000020288	Ahsa2	3'UTR|intron	protein_coding	KNOWN	NA	NA
chr11	31932293	31932323	8205[gene=ENSMUSG00000020300][PH=5][PH0=0.04][P=8.5e-06]	5	+	4	ENSMUSG00000020300	Cpeb4	3'UTR	protein_coding	KNOWN	NA	NA
chr11	31935598	31935628	8256[gene=ENSMUSG00000020300][PH=4][PH0=0.04][P=8.4e-04]	4	+	3	ENSMUSG00000020300	Cpeb4	3'UTR	protein_coding	KNOWN	NA	NA
chr11	31932395	31932425	8214[gene=ENSMUSG00000020300][PH=5][PH0=0.04][P=8.5e-06]	5	+	3	ENSMUSG00000020300	Cpeb4	3'UTR	protein_coding	KNOWN	NA	NA
chr11	30100315	30100345	6848[gene=ENSMUSG00000020315][PH=15][PH0=0.03][P=1.0e-100]	15	-	5	ENSMUSG00000020315	Sptbn1	3'UTR	protein_coding	KNOWN	NA	NA
chr11	30198053	30198083	7024[gene=ENSMUSG00000020315][PH=7][PH0=0.03][P=5.7e-11]	7	-	4	ENSMUSG00000020315	Sptbn1	5'UTR|intron	protein_coding	KNOWN	NA	NA
chr11	40749175	40749205	9793[gene=ENSMUSG00000020326][PH=6][PH0=0.14][P=2.6e-05]	6	-	3	ENSMUSG00000020326	Ccng1	3'UTR	protein_coding	KNOWN	NA	NA
chr11	40749055	40749085	9777[gene=ENSMUSG00000020326][PH=5][PH0=0.14][P=9.0e-04]	5	-	3	ENSMUSG00000020326	Ccng1	3'UTR	protein_coding	KNOWN	NA	NA
chr11	40749203	40749233	9799[gene=ENSMUSG00000020326][PH=6][PH0=0.14][P=2.6e-05]	6	-	3	ENSMUSG00000020326	Ccng1	3'UTR	protein_coding	KNOWN	NA	NA
chr11	40748885	40748915	9759[gene=ENSMUSG00000020326][PH=8][PH0=0.14][P=1.2e-08]	8	-	5	ENSMUSG00000020326	Ccng1	3'UTR	protein_coding	KNOWN	NA	NA
chr11	46193981	46194011	10136[gene=ENSMUSG00000020340][PH=16][PH0=0.05][P=1.0e-100]	16	-	5	ENSMUSG00000020340	Cyfip2	3'UTR	protein_coding	KNOWN	NA	NA
chr11	46194128	46194158	10154[gene=ENSMUSG00000020340][PH=6][PH0=0.05][P=6.1e-07]	6	-	2	ENSMUSG00000020340	Cyfip2	3'UTR	protein_coding	KNOWN	NA	NA
chr11	46236571	46236601	10259[gene=ENSMUSG00000020340][PH=4][PH0=0.05][P=4.3e-03]	4	-	4	ENSMUSG00000020340	Cyfip2	intron	protein_coding	KNOWN	NA	NA
chr11	52122586	52122616	13212[gene=ENSMUSG00000020349][PH=8][PH0=0.11][P=4.5e-09]	8	+	3	ENSMUSG00000020349	Ppp2ca	3'UTR	protein_coding	KNOWN	NA	NA
chr11	52122249	52122279	13183[gene=ENSMUSG00000020349][PH=6][PH0=0.11][P=1.5e-05]	6	+	4	ENSMUSG00000020349	Ppp2ca	3'UTR	protein_coding	KNOWN	NA	NA
chr11	47009668	47009698	11868[gene=ENSMUSG00000020354][PH=2][PH0=0.00][P=6.7e-03]	2	-	1	ENSMUSG00000020354	Sgcd	intron	protein_coding	KNOWN	NA	NA
chr11	51604438	51604468	13207[gene=ENSMUSG00000020358][PH=7][PH0=0.59][P=8.0e-03]	7	-	3	ENSMUSG00000020358	Hnrnpab	CDS	protein_coding	KNOWN	NA	NA
chr11	51601259	51601289	13133[gene=ENSMUSG00000020358][PH=28][PH0=0.59][P=4.9e-14]	28	-	5	ENSMUSG00000020358	Hnrnpab	3'UTR	protein_coding	KNOWN	NA	NA
chr11	51605524	51605554	13236[gene=ENSMUSG00000020358][PH=9][PH0=0.59][P=5.1e-05]	9	-	4	ENSMUSG00000020358	Hnrnpab	CDS	protein_coding	KNOWN	NA	NA
chr11	51600645	51600675	12980[gene=ENSMUSG00000020358][PH=9][PH0=0.59][P=5.1e-05]	9	-	5	ENSMUSG00000020358	Hnrnpab	3'UTR	protein_coding	KNOWN	NA	NA
chr11	51601405	51601435	13169[gene=ENSMUSG00000020358][PH=7][PH0=0.59][P=8.0e-03]	7	-	4	ENSMUSG00000020358	Hnrnpab	3'UTR|CDS	protein_coding	KNOWN	NA	NA
chr11	51601005	51601035	13070[gene=ENSMUSG00000020358][PH=38][PH0=0.59][P=4.9e-14]	38	-	5	ENSMUSG00000020358	Hnrnpab	3'UTR	protein_coding	KNOWN	NA	NA
chr11	51601179	51601209	13104[gene=ENSMUSG00000020358][PH=7][PH0=0.59][P=8.0e-03]	7	-	2	ENSMUSG00000020358	Hnrnpab	3'UTR	protein_coding	KNOWN	NA	NA
chr11	51601441	51601471	13177[gene=ENSMUSG00000020358][PH=7][PH0=0.59][P=8.0e-03]	7	-	4	ENSMUSG00000020358	Hnrnpab	3'UTR|CDS	protein_coding	KNOWN	NA	NA
chr11	51585258	51585288	12903[gene=ENSMUSG00000063564][PH=2][PH0=0.00][P=2.0e-03]	2	+	2	ENSMUSG00000020359	Phykpl	downstream 10K|intron	protein_coding	KNOWN	NA	NA
chr11	53272827	53272857	14394[gene=ENSMUSG00000020361][PH=14][PH0=0.10][P=1.0e-100]	14	-	5	ENSMUSG00000020361	Hspa4	CDS	protein_coding	KNOWN	NA	NA
chr11	49672328	49672358	12131[gene=ENSMUSG00000020362][PH=8][PH0=0.08][P=4.0e-10]	8	-	4	ENSMUSG00000020362	Cnot6	3'UTR	protein_coding	KNOWN	NA	NA
chr11	49671518	49671548	12097[gene=ENSMUSG00000020362][PH=13][PH0=0.08][P=1.5e-13]	13	-	3	ENSMUSG00000020362	Cnot6	3'UTR	protein_coding	KNOWN	NA	NA
chr11	49674446	49674476	12179[gene=ENSMUSG00000020362][PH=4][PH0=0.08][P=8.2e-03]	4	-	4	ENSMUSG00000020362	Cnot6	3'UTR	protein_coding	KNOWN	NA	NA
chr11	49885556	49885586	12371[gene=ENSMUSG00000020366][PH=6][PH0=0.02][P=1.5e-09]	6	+	3	ENSMUSG00000020366	Mapk9	3'UTR	protein_coding	KNOWN	NA	NA
chr11	50295919	50295949	12613[gene=ENSMUSG00000020368][PH=11][PH0=0.22][P=1.7e-11]	11	-	3	ENSMUSG00000020368	Canx	3'UTR	protein_coding	KNOWN	NA	NA
chr11	50295045	50295075	12508[gene=ENSMUSG00000020368][PH=13][PH0=0.22][P=1.0e-100]	13	-	5	ENSMUSG00000020368	Canx	3'UTR	protein_coding	KNOWN	NA	NA
chr11	50296059	50296089	12628[gene=ENSMUSG00000020368][PH=8][PH0=0.22][P=1.1e-06]	8	-	5	ENSMUSG00000020368	Canx	3'UTR	protein_coding	KNOWN	NA	NA
chr11	50307607	50307637	12725[gene=ENSMUSG00000020368][PH=9][PH0=0.22][P=3.0e-08]	9	-	4	ENSMUSG00000020368	Canx	CDS	protein_coding	KNOWN	NA	NA
chr11	50295864	50295894	12590[gene=ENSMUSG00000020368][PH=32][PH0=0.22][P=1.0e-100]	32	-	5	ENSMUSG00000020368	Canx	3'UTR	protein_coding	KNOWN	NA	NA
chr11	48803150	48803180	11906[gene=ENSMUSG00000064780][PH=6][PH0=0.15][P=1.8e-05]	6	+	2	ENSMUSG00000020372	Gnb2l1	intron	protein_coding	KNOWN	NA	NA
chr11	48802074	48802104	11849[gene=ENSMUSG00000020372][PH=495][PH0=1.40][P=1.0e-100]	495	+	5	ENSMUSG00000020372	Gnb2l1	intron	protein_coding	KNOWN	NA	NA
chr11	48806049	48806079	11941[gene=ENSMUSG00000020372][PH=13][PH0=1.40][P=1.5e-05]	13	+	4	ENSMUSG00000020372	Gnb2l1	3'UTR	protein_coding	KNOWN	NA	NA
chr11	51281511	51281541	12876[gene=ENSMUSG00000020385][PH=7][PH0=0.07][P=7.7e-09]	7	+	4	ENSMUSG00000020385	Clk4	3'UTR	protein_coding	KNOWN	NA	NA
chr11	51791539	51791569	12956[gene=ENSMUSG00000020386][PH=4][PH0=0.02][P=3.0e-05]	4	+	3	ENSMUSG00000020386	Sar1b	3'UTR	protein_coding	KNOWN	NA	NA
chr11	51791638	51791668	12965[gene=ENSMUSG00000020386][PH=3][PH0=0.02][P=4.4e-03]	3	+	3	ENSMUSG00000020386	Sar1b	3'UTR	protein_coding	KNOWN	NA	NA
chr11	51791885	51791915	12977[gene=ENSMUSG00000020386][PH=3][PH0=0.02][P=4.4e-03]	3	+	2	ENSMUSG00000020386	Sar1b	3'UTR	protein_coding	KNOWN	NA	NA
chr11	51813745	51813775	13417[gene=ENSMUSG00000020387][PH=7][PH0=0.04][P=2.0e-10]	7	-	4	ENSMUSG00000020387	Phf15	3'UTR	protein_coding	KNOWN	NA	NA
chr11	51813655	51813685	13406[gene=ENSMUSG00000020387][PH=4][PH0=0.04][P=4.6e-04]	4	-	2	ENSMUSG00000020387	Phf15	3'UTR	protein_coding	KNOWN	NA	NA
chr11	51991439	51991469	13727[gene=ENSMUSG00000097219][PH=6][PH0=0.04][P=2.2e-07]	6	-	3	ENSMUSG00000020390	Ube2b	CDS|intron	protein_coding	KNOWN	NA	NA
chr11	51986592	51986622	13678[gene=ENSMUSG00000097219][PH=14][PH0=0.04][P=1.0e-100]	14	-	4	ENSMUSG00000020390	Ube2b	3'UTR|intron	protein_coding	KNOWN	NA	NA
chr11	51986078	51986108	13533[gene=ENSMUSG00000097219][PH=4][PH0=0.04][P=3.0e-03]	4	-	2	ENSMUSG00000020390	Ube2b	3'UTR|intron	protein_coding	KNOWN	NA	NA
chr11	51986533	51986563	13661[gene=ENSMUSG00000097219][PH=4][PH0=0.04][P=3.0e-03]	4	-	3	ENSMUSG00000020390	Ube2b	3'UTR|intron	protein_coding	KNOWN	NA	NA
chr11	51986470	51986500	13639[gene=ENSMUSG00000097219][PH=27][PH0=0.04][P=1.0e-100]	27	-	5	ENSMUSG00000020390	Ube2b	3'UTR|intron	protein_coding	KNOWN	NA	NA
chr11	51976118	51976148	13009[gene=ENSMUSG00000020392][PH=9][PH0=0.04][P=5.8e-14]	9	+	4	ENSMUSG00000020392	Cdkn2aipnl	3'UTR	protein_coding	KNOWN	NA	NA
chr11	5191630	5191660	1052[gene=ENSMUSG00000020393][PH=14][PH0=0.02][P=1.0e-100]	14	-	3	ENSMUSG00000020393	Kremen1	3'UTR	protein_coding	KNOWN	NA	NA
chr11	46325563	46325593	10666[gene=ENSMUSG00000020395][PH=11][PH0=0.43][P=3.4e-08]	11	-	4	ENSMUSG00000020395	Itk	3'UTR	protein_coding	KNOWN	NA	NA
chr11	46326503	46326533	10725[gene=ENSMUSG00000020395][PH=8][PH0=0.43][P=3.0e-04]	8	-	4	ENSMUSG00000020395	Itk	3'UTR	protein_coding	KNOWN	NA	NA
chr11	46325233	46325263	10596[gene=ENSMUSG00000020395][PH=110][PH0=0.43][P=2.2e-13]	110	-	5	ENSMUSG00000020395	Itk	3'UTR	protein_coding	KNOWN	NA	NA
chr11	46389167	46389197	11839[gene=ENSMUSG00000020395][PH=8][PH0=0.43][P=3.0e-04]	8	-	4	ENSMUSG00000020395	Itk	intron	protein_coding	KNOWN	NA	NA
chr11	46327082	46327112	10769[gene=ENSMUSG00000020395][PH=13][PH0=0.43][P=4.9e-11]	13	-	5	ENSMUSG00000020395	Itk	3'UTR	protein_coding	KNOWN	NA	NA
chr11	46441499	46441529	11725[gene=ENSMUSG00000020397][PH=3][PH0=0.03][P=3.7e-03]	3	+	1	ENSMUSG00000020397	Med7	3'UTR	protein_coding	KNOWN	NA	NA
chr11	46441468	46441498	11723[gene=ENSMUSG00000020397][PH=3][PH0=0.03][P=3.7e-03]	3	+	2	ENSMUSG00000020397	Med7	3'UTR	protein_coding	KNOWN	NA	NA
chr11	8993169	8993199	3039[gene=ENSMUSG00000020413][PH=3][PH0=0.01][P=1.2e-03]	3	-	2	ENSMUSG00000020413	Hus1	3'UTR	protein_coding	KNOWN	NA	NA
chr1	134077208	134077238	25685[gene=ENSMUSG00000020423][PH=60][PH0=0.38][P=1.0e-100]	60	-	5	ENSMUSG00000020423	Btg2	3'UTR	protein_coding	KNOWN	NA	NA
chr1	134075992	134076022	25624[gene=ENSMUSG00000020423][PH=16][PH0=0.38][P=1.0e-100]	16	-	5	ENSMUSG00000020423	Btg2	3'UTR	protein_coding	KNOWN	NA	NA
chr1	134075333	134075363	25575[gene=ENSMUSG00000020423][PH=11][PH0=0.38][P=1.7e-09]	11	-	4	ENSMUSG00000020423	Btg2	3'UTR	protein_coding	KNOWN	NA	NA
chr11	59183914	59183944	15440[gene=ENSMUSG00000020444][PH=3][PH0=0.01][P=2.6e-04]	3	-	2	ENSMUSG00000020444	Guk1	3'UTR	protein_coding	KNOWN	NA	NA
chr11	3308727	3308757	123[gene=ENSMUSG00000020453][PH=6][PH0=0.03][P=6.0e-09]	6	+	5	ENSMUSG00000020453	Patz1	3'UTR	protein_coding	KNOWN	NA	NA
chr11	58991412	58991442	16713[gene=ENSMUSG00000020455][PH=6][PH0=0.04][P=1.7e-08]	6	+	2	ENSMUSG00000020455	Trim11	3'UTR	protein_coding	KNOWN	NA	NA
chr11	6356551	6356581	1373[gene=ENSMUSG00000020456][PH=34][PH0=0.06][P=1.0e-100]	34	+	5	ENSMUSG00000020456	Ogdh	3'UTR	protein_coding	KNOWN	NA	NA
chr11	6356594	6356624	1390[gene=ENSMUSG00000020456][PH=4][PH0=0.06][P=3.7e-03]	4	+	2	ENSMUSG00000020456	Ogdh	3'UTR	protein_coding	KNOWN	NA	NA
chr11	3252762	3252792	71[gene=ENSMUSG00000020457][PH=10][PH0=0.02][P=2.6e-13]	10	-	4	ENSMUSG00000020457	Drg1	CDS|downstream 10K	protein_coding	KNOWN	NA	NA
chr11	29161630	29161660	7181[gene=ENSMUSG00000020464][PH=6][PH0=0.04][P=2.9e-08]	6	+	3	ENSMUSG00000020464	Pnpt1	3'UTR	protein_coding	KNOWN	NA	NA
chr11	5800084	5800114	1142[gene=ENSMUSG00000020476][PH=6][PH0=0.05][P=9.3e-08]	6	+	3	ENSMUSG00000020476	Dbnl	3'UTR	protein_coding	KNOWN	NA	NA
chr11	5791797	5791827	1119[gene=ENSMUSG00000083844][PH=3][PH0=0.03][P=6.9e-03]	3	+	2	ENSMUSG00000020476	Dbnl	CDS	protein_coding	KNOWN	NA	NA
chr11	5634417	5634447	1082[gene=ENSMUSG00000020481][PH=2][PH0=0.00][P=4.6e-03]	2	+	1	ENSMUSG00000020481	Ankrd36	intron	protein_coding	KNOWN	NA	NA
chr11	5529922	5529952	1780[gene=ENSMUSG00000020482][PH=7][PH0=0.03][P=1.5e-11]	7	-	3	ENSMUSG00000020482	Ccdc117	3'UTR	protein_coding	KNOWN	NA	NA
chr11	5525861	5525891	1070[gene=ENSMUSG00000020484][PH=4][PH0=0.04][P=2.5e-04]	4	+	3	ENSMUSG00000020484	Xbp1	3'UTR	protein_coding	KNOWN	NA	NA
chr11	87077764	87077794	26222[gene=ENSMUSG00000020495][PH=9][PH0=0.04][P=1.0e-100]	9	-	3	ENSMUSG00000020495	Smg8	3'UTR	protein_coding	KNOWN	NA	NA
chr11	58932350	58932380	15400[gene=ENSMUSG00000020496][PH=3][PH0=0.02][P=1.8e-03]	3	-	2	ENSMUSG00000020496	Rnf187	3'UTR	protein_coding	KNOWN	NA	NA
chr11	58118552	58118582	16428[gene=ENSMUSG00000020515][PH=10][PH0=0.03][P=7.2e-14]	10	+	4	ENSMUSG00000020515	Cnot8	3'UTR	protein_coding	KNOWN	NA	NA
chr11	86499875	86499905	25115[gene=ENSMUSG00000020516][PH=5][PH0=0.08][P=1.5e-04]	5	-	4	ENSMUSG00000020516	Rps6kb1	3'UTR	protein_coding	KNOWN	NA	NA
chr11	86500054	86500084	25129[gene=ENSMUSG00000020516][PH=7][PH0=0.08][P=2.8e-08]	7	-	2	ENSMUSG00000020516	Rps6kb1	3'UTR	protein_coding	KNOWN	NA	NA
chr11	57483719	57483749	15179[gene=ENSMUSG00000020523][PH=3][PH0=0.02][P=8.0e-03]	3	-	2	ENSMUSG00000020523	Fam114a2	3'UTR	protein_coding	KNOWN	NA	NA
chr11	85347013	85347043	27121[gene=ENSMUSG00000020525][PH=5][PH0=0.02][P=7.7e-08]	5	+	4	ENSMUSG00000020525	Ppm1d	3'UTR	protein_coding	KNOWN	NA	NA
chr11	84910966	84910996	27024[gene=ENSMUSG00000020527][PH=11][PH0=0.03][P=1.0e-100]	11	+	5	ENSMUSG00000020527	Myo19	3'UTR	protein_coding	KNOWN	NA	NA
chr11	84911056	84911086	27039[gene=ENSMUSG00000020527][PH=5][PH0=0.03][P=5.9e-07]	5	+	3	ENSMUSG00000020527	Myo19	3'UTR	protein_coding	KNOWN	NA	NA
chr11	84832585	84832615	23814[gene=ENSMUSG00000020530][PH=6][PH0=0.09][P=6.4e-06]	6	-	4	ENSMUSG00000020530	Ggnbp2	3'UTR	protein_coding	KNOWN	NA	NA
chr11	60199601	60199631	15610[gene=ENSMUSG00000020538][PH=5][PH0=0.03][P=1.1e-06]	5	-	2	ENSMUSG00000020538	Srebf1	3'UTR	protein_coding	KNOWN	NA	NA
chr11	90644809	90644839	28961[gene=ENSMUSG00000020544][PH=4][PH0=0.04][P=2.3e-04]	4	+	3	ENSMUSG00000020544	Cox11	3'UTR	protein_coding	KNOWN	NA	NA
chr12	36134921	36134951	2692[gene=ENSMUSG00000020547][PH=9][PH0=0.05][P=1.1e-16]	9	-	5	ENSMUSG00000020547	Bzw2	CDS	protein_coding	KNOWN	NA	NA
chr12	33439370	33439400	6286[gene=ENSMUSG00000020561][PH=5][PH0=0.07][P=4.6e-05]	5	+	3	ENSMUSG00000020561	Twistnb	3'UTR	protein_coding	KNOWN	NA	NA
chr12	33438410	33438440	6261[gene=ENSMUSG00000020561][PH=4][PH0=0.07][P=2.4e-03]	4	+	2	ENSMUSG00000020561	Twistnb	3'UTR	protein_coding	KNOWN	NA	NA
chr12	33375029	33375059	6201[gene=ENSMUSG00000020564][PH=8][PH0=0.03][P=1.1e-16]	8	+	4	ENSMUSG00000020564	Atxn7l1	3'UTR	protein_coding	KNOWN	NA	NA
chr12	32850941	32850971	5806[gene=ENSMUSG00000020572][PH=6][PH0=0.06][P=4.3e-07]	6	+	2	ENSMUSG00000020572	Nampt	3'UTR	protein_coding	KNOWN	NA	NA
chr12	16986501	16986531	4058[gene=ENSMUSG00000020580][PH=5][PH0=0.10][P=1.3e-03]	5	+	3	ENSMUSG00000020580	Rock2	3'UTR	protein_coding	KNOWN	NA	NA
chr12	16985420	16985450	3969[gene=ENSMUSG00000020580][PH=23][PH0=0.10][P=3.0e-13]	23	+	5	ENSMUSG00000020580	Rock2	3'UTR	protein_coding	KNOWN	NA	NA
chr12	16977612	16977642	3891[gene=ENSMUSG00000020580][PH=5][PH0=0.10][P=1.3e-03]	5	+	2	ENSMUSG00000020580	Rock2	CDS	protein_coding	KNOWN	NA	NA
chr12	16985812	16985842	4023[gene=ENSMUSG00000020580][PH=22][PH0=0.10][P=3.0e-13]	22	+	4	ENSMUSG00000020580	Rock2	3'UTR	protein_coding	KNOWN	NA	NA
chr12	16977635	16977665	3893[gene=ENSMUSG00000020580][PH=5][PH0=0.10][P=1.3e-03]	5	+	3	ENSMUSG00000020580	Rock2	CDS	protein_coding	KNOWN	NA	NA
chr12	16985174	16985204	3940[gene=ENSMUSG00000020580][PH=6][PH0=0.10][P=2.7e-05]	6	+	4	ENSMUSG00000020580	Rock2	3'UTR	protein_coding	KNOWN	NA	NA
chr12	16985731	16985761	4004[gene=ENSMUSG00000020580][PH=6][PH0=0.10][P=2.7e-05]	6	+	3	ENSMUSG00000020580	Rock2	3'UTR	protein_coding	KNOWN	NA	NA
chr12	16943511	16943541	3760[gene=ENSMUSG00000020580][PH=5][PH0=0.10][P=1.3e-03]	5	+	3	ENSMUSG00000020580	Rock2	intron	protein_coding	KNOWN	NA	NA
chr12	8938495	8938525	2956[gene=ENSMUSG00000020585][PH=4][PH0=0.05][P=6.4e-04]	4	+	3	ENSMUSG00000020585	Laptm4a	3'UTR	protein_coding	KNOWN	NA	NA
chr12	8750102	8750132	2681[gene=ENSMUSG00000020594][PH=8][PH0=0.20][P=8.9e-07]	8	+	5	ENSMUSG00000020594	Pum2	3'UTR	protein_coding	KNOWN	NA	NA
chr12	8750418	8750448	2755[gene=ENSMUSG00000020594][PH=7][PH0=0.20][P=3.1e-05]	7	+	4	ENSMUSG00000020594	Pum2	3'UTR	protein_coding	KNOWN	NA	NA
chr12	8750565	8750595	2773[gene=ENSMUSG00000020594][PH=10][PH0=0.20][P=4.9e-10]	10	+	4	ENSMUSG00000020594	Pum2	3'UTR	protein_coding	KNOWN	NA	NA
chr12	8749898	8749928	2634[gene=ENSMUSG00000020594][PH=25][PH0=0.20][P=1.0e-100]	25	+	5	ENSMUSG00000020594	Pum2	3'UTR	protein_coding	KNOWN	NA	NA
chr12	8750360	8750390	2738[gene=ENSMUSG00000020594][PH=13][PH0=0.20][P=1.0e-100]	13	+	5	ENSMUSG00000020594	Pum2	3'UTR	protein_coding	KNOWN	NA	NA
chr12	8751551	8751581	2852[gene=ENSMUSG00000020594][PH=10][PH0=0.20][P=4.9e-10]	10	+	4	ENSMUSG00000020594	Pum2	3'UTR	protein_coding	KNOWN	NA	NA
chr12	8750957	8750987	2803[gene=ENSMUSG00000020594][PH=6][PH0=0.20][P=9.4e-04]	6	+	3	ENSMUSG00000020594	Pum2	3'UTR	protein_coding	KNOWN	NA	NA
chr12	8744393	8744423	2555[gene=ENSMUSG00000020594][PH=10][PH0=0.20][P=4.9e-10]	10	+	5	ENSMUSG00000020594	Pum2	3'UTR|CDS	protein_coding	KNOWN	NA	NA
chr12	8750241	8750271	2714[gene=ENSMUSG00000020594][PH=11][PH0=0.20][P=9.4e-12]	11	+	5	ENSMUSG00000020594	Pum2	3'UTR	protein_coding	KNOWN	NA	NA
chr12	8751436	8751466	2836[gene=ENSMUSG00000020594][PH=7][PH0=0.20][P=3.1e-05]	7	+	4	ENSMUSG00000020594	Pum2	3'UTR	protein_coding	KNOWN	NA	NA
chr12	8719050	8719080	2371[gene=ENSMUSG00000020594][PH=7][PH0=0.20][P=3.1e-05]	7	+	4	ENSMUSG00000020594	Pum2	3'UTR|CDS	protein_coding	KNOWN	NA	NA
chr12	8750047	8750077	2665[gene=ENSMUSG00000020594][PH=9][PH0=0.20][P=2.2e-08]	9	+	3	ENSMUSG00000020594	Pum2	3'UTR	protein_coding	KNOWN	NA	NA
chr12	15816121	15816151	1302[gene=ENSMUSG00000020601][PH=4][PH0=0.07][P=3.8e-03]	4	-	1	ENSMUSG00000020601	Trib2	5'UTR	protein_coding	KNOWN	NA	NA
chr12	15792425	15792455	1232[gene=ENSMUSG00000020601][PH=10][PH0=0.07][P=1.0e-100]	10	-	5	ENSMUSG00000020601	Trib2	3'UTR	protein_coding	KNOWN	NA	NA
chr12	15793101	15793131	1258[gene=ENSMUSG00000020601][PH=7][PH0=0.07][P=1.2e-08]	7	-	4	ENSMUSG00000020601	Trib2	3'UTR	protein_coding	KNOWN	NA	NA
chr12	15791725	15791755	1205[gene=ENSMUSG00000020601][PH=5][PH0=0.07][P=6.9e-05]	5	-	2	ENSMUSG00000020601	Trib2	3'UTR	protein_coding	KNOWN	NA	NA
chr12	11318113	11318143	3149[gene=ENSMUSG00000020608][PH=4][PH0=0.03][P=3.0e-04]	4	+	3	ENSMUSG00000020608	Smc6	3'UTR	protein_coding	KNOWN	NA	NA
chr11	109401113	109401143	35113[gene=ENSMUSG00000020611][PH=5][PH0=0.14][P=2.4e-03]	5	+	4	ENSMUSG00000020611	Gna13	3'UTR	protein_coding	KNOWN	NA	NA
chr11	109398041	109398071	35016[gene=ENSMUSG00000020611][PH=5][PH0=0.14][P=2.4e-03]	5	+	4	ENSMUSG00000020611	Gna13	3'UTR	protein_coding	KNOWN	NA	NA
chr11	109401329	109401359	35161[gene=ENSMUSG00000020611][PH=24][PH0=0.14][P=2.9e-13]	24	+	5	ENSMUSG00000020611	Gna13	3'UTR	protein_coding	KNOWN	NA	NA
chr11	109399666	109399696	35059[gene=ENSMUSG00000020611][PH=5][PH0=0.14][P=2.4e-03]	5	+	4	ENSMUSG00000020611	Gna13	3'UTR	protein_coding	KNOWN	NA	NA
chr11	109401197	109401227	35128[gene=ENSMUSG00000020611][PH=20][PH0=0.14][P=2.9e-13]	20	+	5	ENSMUSG00000020611	Gna13	3'UTR	protein_coding	KNOWN	NA	NA
chr11	109668315	109668345	35328[gene=ENSMUSG00000020612][PH=14][PH0=0.20][P=1.0e-100]	14	+	4	ENSMUSG00000020612	Prkar1a	3'UTR	protein_coding	KNOWN	NA	NA
chr11	109668717	109668747	35349[gene=ENSMUSG00000020612][PH=5][PH0=0.20][P=9.3e-03]	5	+	4	ENSMUSG00000020612	Prkar1a	3'UTR	protein_coding	KNOWN	NA	NA
chr11	109668907	109668937	35381[gene=ENSMUSG00000020612][PH=6][PH0=0.20][P=3.9e-04]	6	+	4	ENSMUSG00000020612	Prkar1a	3'UTR	protein_coding	KNOWN	NA	NA
chr11	109668792	109668822	35366[gene=ENSMUSG00000020612][PH=9][PH0=0.20][P=1.0e-08]	9	+	3	ENSMUSG00000020612	Prkar1a	3'UTR	protein_coding	KNOWN	NA	NA
chr11	109669027	109669057	35409[gene=ENSMUSG00000020612][PH=5][PH0=0.20][P=9.3e-03]	5	+	4	ENSMUSG00000020612	Prkar1a	3'UTR	protein_coding	KNOWN	NA	NA
chr11	109669088	109669118	35420[gene=ENSMUSG00000020612][PH=6][PH0=0.20][P=3.9e-04]	6	+	3	ENSMUSG00000020612	Prkar1a	3'UTR	protein_coding	KNOWN	NA	NA
chr11	109668966	109668996	35396[gene=ENSMUSG00000020612][PH=13][PH0=0.20][P=1.0e-100]	13	+	4	ENSMUSG00000020612	Prkar1a	3'UTR	protein_coding	KNOWN	NA	NA
chr11	109668747	109668777	35354[gene=ENSMUSG00000020612][PH=6][PH0=0.20][P=3.9e-04]	6	+	4	ENSMUSG00000020612	Prkar1a	3'UTR	protein_coding	KNOWN	NA	NA
chr11	109668001	109668031	35295[gene=ENSMUSG00000020612][PH=5][PH0=0.20][P=9.3e-03]	5	+	4	ENSMUSG00000020612	Prkar1a	3'UTR	protein_coding	KNOWN	NA	NA
chr11	109669131	109669161	35430[gene=ENSMUSG00000020612][PH=12][PH0=0.20][P=8.9e-14]	12	+	5	ENSMUSG00000020612	Prkar1a	3'UTR	protein_coding	KNOWN	NA	NA
chr12	28659547	28659577	5118[gene=ENSMUSG00000020630][PH=11][PH0=0.04][P=1.0e-100]	11	+	5	ENSMUSG00000020630	Rnaseh1	3'UTR	protein_coding	KNOWN	NA	NA
chr12	4879930	4879960	880[gene=ENSMUSG00000020634][PH=4][PH0=0.08][P=6.9e-03]	4	-	3	ENSMUSG00000020634	Ubxn2a	3'UTR	protein_coding	KNOWN	NA	NA
chr12	4879040	4879070	856[gene=ENSMUSG00000020634][PH=4][PH0=0.08][P=6.9e-03]	4	-	2	ENSMUSG00000020634	Ubxn2a	3'UTR	protein_coding	KNOWN	NA	NA
chr12	4713855	4713885	1464[gene=ENSMUSG00000020640][PH=4][PH0=0.04][P=2.2e-03]	4	+	3	ENSMUSG00000020640	Itsn2	3'UTR	protein_coding	KNOWN	NA	NA
chr12	4713885	4713915	1467[gene=ENSMUSG00000020640][PH=5][PH0=0.04][P=2.4e-05]	5	+	3	ENSMUSG00000020640	Itsn2	3'UTR	protein_coding	KNOWN	NA	NA
chr12	4677745	4677775	1404[gene=ENSMUSG00000020640][PH=7][PH0=0.04][P=1.6e-09]	7	+	4	ENSMUSG00000020640	Itsn2	intron	protein_coding	KNOWN	NA	NA
chr12	4671478	4671508	1363[gene=ENSMUSG00000020640][PH=4][PH0=0.04][P=2.2e-03]	4	+	2	ENSMUSG00000020640	Itsn2	CDS	protein_coding	KNOWN	NA	NA
chr12	4676674	4676704	1384[gene=ENSMUSG00000020640][PH=4][PH0=0.04][P=2.2e-03]	4	+	2	ENSMUSG00000020640	Itsn2	intron	protein_coding	KNOWN	NA	NA
chr12	25094280	25094310	1702[gene=ENSMUSG00000020644][PH=11][PH0=0.08][P=1.0e-100]	11	-	4	ENSMUSG00000020644	Id2	3'UTR	protein_coding	KNOWN	NA	NA
chr12	4248734	4248764	638[gene=ENSMUSG00000020647][PH=3][PH0=0.01][P=8.0e-03]	3	-	3	ENSMUSG00000020647	Ncoa1	3'UTR	protein_coding	KNOWN	NA	NA
chr12	4247437	4247467	622[gene=ENSMUSG00000020647][PH=5][PH0=0.01][P=1.3e-07]	5	-	4	ENSMUSG00000020647	Ncoa1	3'UTR	protein_coding	KNOWN	NA	NA
chr12	24616717	24616747	4875[gene=ENSMUSG00000020656][PH=3][PH0=0.01][P=6.4e-04]	3	+	3	ENSMUSG00000020656	Grhl1	3'UTR	protein_coding	KNOWN	NA	NA
chr12	4108898	4108928	1092[gene=ENSMUSG00000020657][PH=34][PH0=0.06][P=1.1e-13]	34	+	5	ENSMUSG00000020657	Dnajc27	3'UTR	protein_coding	KNOWN	NA	NA
chr12	31486329	31486359	2030[gene=ENSMUSG00000020659][PH=5][PH0=0.07][P=5.8e-05]	5	-	2	ENSMUSG00000020659	Cbll1	3'UTR	protein_coding	KNOWN	NA	NA
chr12	31486472	31486502	2039[gene=ENSMUSG00000020659][PH=5][PH0=0.07][P=5.8e-05]	5	-	4	ENSMUSG00000020659	Cbll1	3'UTR	protein_coding	KNOWN	NA	NA
chr12	3911922	3911952	908[gene=ENSMUSG00000020661][PH=5][PH0=0.10][P=1.5e-03]	5	+	3	ENSMUSG00000020661	Dnmt3a	3'UTR	protein_coding	KNOWN	NA	NA
chr12	3912785	3912815	960[gene=ENSMUSG00000020661][PH=10][PH0=0.10][P=1.0e-12]	10	+	5	ENSMUSG00000020661	Dnmt3a	3'UTR	protein_coding	KNOWN	NA	NA
chr12	3913452	3913482	1024[gene=ENSMUSG00000020661][PH=5][PH0=0.10][P=1.5e-03]	5	+	3	ENSMUSG00000020661	Dnmt3a	3'UTR	protein_coding	KNOWN	NA	NA
chr12	3912695	3912725	937[gene=ENSMUSG00000020661][PH=13][PH0=0.10][P=1.0e-100]	13	+	5	ENSMUSG00000020661	Dnmt3a	3'UTR	protein_coding	KNOWN	NA	NA
chr12	3913400	3913430	1013[gene=ENSMUSG00000020661][PH=13][PH0=0.10][P=1.0e-100]	13	+	3	ENSMUSG00000020661	Dnmt3a	3'UTR	protein_coding	KNOWN	NA	NA
chr12	3914397	3914427	1039[gene=ENSMUSG00000020661][PH=5][PH0=0.10][P=1.5e-03]	5	+	2	ENSMUSG00000020661	Dnmt3a	3'UTR	protein_coding	KNOWN	NA	NA
chr12	3909671	3909701	878[gene=ENSMUSG00000020661][PH=11][PH0=0.10][P=1.0e-100]	11	+	4	ENSMUSG00000020661	Dnmt3a	3'UTR|intron	protein_coding	KNOWN	NA	NA
chr12	3909150	3909180	848[gene=ENSMUSG00000020661][PH=13][PH0=0.10][P=1.0e-100]	13	+	5	ENSMUSG00000020661	Dnmt3a	3'UTR|intron	protein_coding	KNOWN	NA	NA
chr12	3913180	3913210	991[gene=ENSMUSG00000020661][PH=13][PH0=0.10][P=1.0e-100]	13	+	5	ENSMUSG00000020661	Dnmt3a	3'UTR	protein_coding	KNOWN	NA	NA
chr12	31335497	31335527	1952[gene=ENSMUSG00000020664][PH=5][PH0=0.04][P=1.8e-06]	5	-	2	ENSMUSG00000020664	Dld	CDS	protein_coding	KNOWN	NA	NA
chr12	3248944	3248974	115[gene=ENSMUSG00000020671][PH=6][PH0=0.16][P=1.9e-04]	6	-	5	ENSMUSG00000020671	Rab10	3'UTR	protein_coding	KNOWN	NA	NA
chr12	3248423	3248453	60[gene=ENSMUSG00000020671][PH=17][PH0=0.16][P=1.0e-100]	17	-	5	ENSMUSG00000020671	Rab10	3'UTR	protein_coding	KNOWN	NA	NA
chr12	3249134	3249164	126[gene=ENSMUSG00000020671][PH=5][PH0=0.16][P=5.9e-03]	5	-	2	ENSMUSG00000020671	Rab10	3'UTR	protein_coding	KNOWN	NA	NA
chr12	3249589	3249619	183[gene=ENSMUSG00000020671][PH=26][PH0=0.16][P=1.0e-100]	26	-	4	ENSMUSG00000020671	Rab10	3'UTR	protein_coding	KNOWN	NA	NA
chr12	3249485	3249515	151[gene=ENSMUSG00000020671][PH=6][PH0=0.16][P=1.9e-04]	6	-	4	ENSMUSG00000020671	Rab10	3'UTR	protein_coding	KNOWN	NA	NA
chr11	83506659	83506689	26544[gene=ENSMUSG00000020680][PH=5][PH0=0.12][P=1.2e-03]	5	+	3	ENSMUSG00000020680	Taf15	3'UTR	protein_coding	KNOWN	NA	NA
chr11	104503949	104503979	34142[gene=ENSMUSG00000020687][PH=4][PH0=0.04][P=8.8e-04]	4	-	3	ENSMUSG00000020687	Cdc27	3'UTR	protein_coding	KNOWN	NA	NA
chr11	104502767	104502797	34124[gene=ENSMUSG00000020687][PH=6][PH0=0.04][P=8.4e-08]	6	-	5	ENSMUSG00000020687	Cdc27	3'UTR	protein_coding	KNOWN	NA	NA
chr11	105282140	105282170	33926[gene=ENSMUSG00000020694][PH=9][PH0=0.03][P=1.0e-100]	9	+	5	ENSMUSG00000020694	Tlk2	3'UTR	protein_coding	KNOWN	NA	NA
chr11	82803837	82803867	25793[gene=ENSMUSG00000020697][PH=4][PH0=0.05][P=8.6e-04]	4	+	3	ENSMUSG00000020697	Lig3	3'UTR|intron	protein_coding	KNOWN	NA	NA
chr11	82802056	82802086	25767[gene=ENSMUSG00000020697][PH=4][PH0=0.05][P=8.6e-04]	4	+	3	ENSMUSG00000020697	Lig3	3'UTR|intron	protein_coding	KNOWN	NA	NA
chr11	106249077	106249107	34384[gene=ENSMUSG00000020705][PH=4][PH0=0.05][P=8.9e-04]	4	+	2	ENSMUSG00000020705	Ddx42	3'UTR	protein_coding	KNOWN	NA	NA
chr11	106248215	106248245	34372[gene=ENSMUSG00000020705][PH=4][PH0=0.05][P=8.9e-04]	4	+	2	ENSMUSG00000020705	Ddx42	3'UTR	protein_coding	KNOWN	NA	NA
chr11	106395142	106395172	34533[gene=ENSMUSG00000020715][PH=3][PH0=0.01][P=2.0e-03]	3	-	2	ENSMUSG00000020715	Ern1	3'UTR	protein_coding	KNOWN	NA	NA
chr11	79392946	79392976	24477[gene=ENSMUSG00000020716][PH=7][PH0=0.02][P=3.7e-12]	7	+	4	ENSMUSG00000020716	Nf1	intron	protein_coding	KNOWN	NA	NA
chr11	79447507	79447537	24530[gene=ENSMUSG00000020716][PH=4][PH0=0.02][P=8.6e-05]	4	+	4	ENSMUSG00000020716	Nf1	CDS	protein_coding	KNOWN	NA	NA
chr11	106654381	106654411	34694[gene=ENSMUSG00000020717][PH=12][PH0=0.04][P=1.0e-100]	12	-	5	ENSMUSG00000020717	Pecam1	3'UTR	protein_coding	KNOWN	NA	NA
chr11	106654429	106654459	34705[gene=ENSMUSG00000020717][PH=5][PH0=0.04][P=1.8e-05]	5	-	3	ENSMUSG00000020717	Pecam1	3'UTR	protein_coding	KNOWN	NA	NA
chr11	106786088	106786118	35479[gene=ENSMUSG00000020719][PH=15][PH0=0.95][P=9.1e-10]	15	-	5	ENSMUSG00000020719	Ddx5	CDS|intron	protein_coding	KNOWN	NA	NA
chr11	106780449	106780479	34975[gene=ENSMUSG00000020719][PH=21][PH0=0.95][P=5.5e-14]	21	-	4	ENSMUSG00000020719	Ddx5	3'UTR	protein_coding	KNOWN	NA	NA
chr11	106781428	106781458	35226[gene=ENSMUSG00000020719][PH=15][PH0=0.95][P=9.1e-10]	15	-	5	ENSMUSG00000020719	Ddx5	3'UTR	protein_coding	KNOWN	NA	NA
chr11	106782542	106782572	35323[gene=ENSMUSG00000020719][PH=11][PH0=0.95][P=2.6e-05]	11	-	4	ENSMUSG00000020719	Ddx5	3'UTR|CDS	protein_coding	KNOWN	NA	NA
chr11	106781727	106781757	35293[gene=ENSMUSG00000020719][PH=47][PH0=0.95][P=5.5e-14]	47	-	5	ENSMUSG00000020719	Ddx5	3'UTR	protein_coding	KNOWN	NA	NA
chr11	106781213	106781243	35169[gene=ENSMUSG00000020719][PH=15][PH0=0.95][P=9.1e-10]	15	-	5	ENSMUSG00000020719	Ddx5	3'UTR	protein_coding	KNOWN	NA	NA
chr11	106781303	106781333	35197[gene=ENSMUSG00000020719][PH=15][PH0=0.95][P=9.1e-10]	15	-	4	ENSMUSG00000020719	Ddx5	3'UTR	protein_coding	KNOWN	NA	NA
chr11	106780515	106780545	34998[gene=ENSMUSG00000020719][PH=9][PH0=0.95][P=2.6e-03]	9	-	3	ENSMUSG00000020719	Ddx5	3'UTR	protein_coding	KNOWN	NA	NA
chr11	106780536	106780566	35006[gene=ENSMUSG00000020719][PH=9][PH0=0.95][P=2.6e-03]	9	-	5	ENSMUSG00000020719	Ddx5	3'UTR	protein_coding	KNOWN	NA	NA
chr11	106780673	106780703	35060[gene=ENSMUSG00000020719][PH=112][PH0=0.95][P=5.5e-14]	112	-	5	ENSMUSG00000020719	Ddx5	3'UTR	protein_coding	KNOWN	NA	NA
chr11	106781652	106781682	35264[gene=ENSMUSG00000020719][PH=15][PH0=0.95][P=9.1e-10]	15	-	4	ENSMUSG00000020719	Ddx5	3'UTR	protein_coding	KNOWN	NA	NA
chr11	107497637	107497667	34648[gene=ENSMUSG00000020720][PH=22][PH0=0.05][P=1.0e-100]	22	+	4	ENSMUSG00000020720	Psmd12	CDS|intron	protein_coding	KNOWN	NA	NA
chr11	107688876	107688906	34789[gene=ENSMUSG00000020721][PH=5][PH0=0.02][P=2.2e-07]	5	+	4	ENSMUSG00000020721	Helz	3'UTR	protein_coding	KNOWN	NA	NA
chr11	107619160	107619190	34733[gene=ENSMUSG00000020721][PH=6][PH0=0.02][P=7.3e-10]	6	+	3	ENSMUSG00000020721	Helz	CDS	protein_coding	KNOWN	NA	NA
chr11	115181058	115181088	35650[gene=ENSMUSG00000020733][PH=3][PH0=0.02][P=2.0e-03]	3	+	3	ENSMUSG00000020733	Slc9a3r1	3'UTR	protein_coding	KNOWN	NA	NA
chr11	74651246	74651276	20987[gene=ENSMUSG00000069814][PH=2][PH0=0.00][P=4.7e-03]	2	+	1	ENSMUSG00000020741	Cluh	downstream 10K|intron	protein_coding	KNOWN	NA	NA
chr11	74670043	74670073	21033[gene=ENSMUSG00000020741][PH=4][PH0=0.04][P=3.7e-04]	4	+	2	ENSMUSG00000020741	Cluh	3'UTR	protein_coding	KNOWN	NA	NA
chr11	115607999	115608029	40508[gene=ENSMUSG00000020743][PH=4][PH0=0.04][P=1.3e-04]	4	-	4	ENSMUSG00000020743	Mif4gd	3'UTR	protein_coding	KNOWN	NA	NA
chr11	74674056	74674086	19768[gene=ENSMUSG00000020745][PH=5][PH0=0.13][P=2.2e-03]	5	-	2	ENSMUSG00000020745	Pafah1b1	3'UTR	protein_coding	KNOWN	NA	NA
chr11	74677509	74677539	19910[gene=ENSMUSG00000020745][PH=17][PH0=0.13][P=3.6e-13]	17	-	5	ENSMUSG00000020745	Pafah1b1	3'UTR	protein_coding	KNOWN	NA	NA
chr11	74677453	74677483	19888[gene=ENSMUSG00000020745][PH=6][PH0=0.13][P=5.9e-05]	6	-	4	ENSMUSG00000020745	Pafah1b1	3'UTR	protein_coding	KNOWN	NA	NA
chr11	74677009	74677039	19868[gene=ENSMUSG00000020745][PH=8][PH0=0.13][P=2.4e-08]	8	-	4	ENSMUSG00000020745	Pafah1b1	3'UTR	protein_coding	KNOWN	NA	NA
chr11	74674596	74674626	19795[gene=ENSMUSG00000020745][PH=22][PH0=0.13][P=3.6e-13]	22	-	5	ENSMUSG00000020745	Pafah1b1	3'UTR	protein_coding	KNOWN	NA	NA
chr11	116172651	116172681	40997[gene=ENSMUSG00000020777][PH=3][PH0=0.01][P=1.1e-03]	3	-	2	ENSMUSG00000020777	Acox1	3'UTR	protein_coding	KNOWN	NA	NA
chr11	115855717	115855747	35801[gene=ENSMUSG00000020782][PH=6][PH0=0.01][P=2.4e-11]	6	+	4	ENSMUSG00000020782	Llgl2	3'UTR	protein_coding	KNOWN	NA	NA
chr11	73080021	73080051	20938[gene=ENSMUSG00000020783][PH=4][PH0=0.03][P=1.2e-04]	4	+	3	ENSMUSG00000020783	1200014J11Rik	3'UTR	protein_coding	KNOWN	NA	NA
chr11	72770866	72770896	20739[gene=ENSMUSG00000020790][PH=4][PH0=0.03][P=4.1e-04]	4	+	3	ENSMUSG00000020790	Ankfy1	3'UTR	protein_coding	KNOWN	NA	NA
chr11	72768889	72768919	20700[gene=ENSMUSG00000020790][PH=7][PH0=0.03][P=1.1e-10]	7	+	3	ENSMUSG00000020790	Ankfy1	3'UTR	protein_coding	KNOWN	NA	NA
chr11	72769182	72769212	20717[gene=ENSMUSG00000020790][PH=4][PH0=0.03][P=4.1e-04]	4	+	4	ENSMUSG00000020790	Ankfy1	3'UTR	protein_coding	KNOWN	NA	NA
chr11	72683763	72683793	20550[gene=ENSMUSG00000020794][PH=7][PH0=0.06][P=1.1e-08]	7	+	3	ENSMUSG00000020794	Ube2g1	3'UTR	protein_coding	KNOWN	NA	NA
chr11	72680417	72680447	20519[gene=ENSMUSG00000020794][PH=5][PH0=0.06][P=8.5e-05]	5	+	1	ENSMUSG00000020794	Ube2g1	downstream 10K|intron	protein_coding	KNOWN	NA	NA
chr11	72211720	72211750	19633[gene=ENSMUSG00000020801][PH=3][PH0=0.03][P=6.1e-03]	3	-	3	ENSMUSG00000020801	Med31	3'UTR	protein_coding	KNOWN	NA	NA
chr11	116538018	116538048	41187[gene=ENSMUSG00000020802][PH=7][PH0=0.02][P=3.0e-12]	7	-	4	ENSMUSG00000020802	Ube2o	3'UTR	protein_coding	KNOWN	NA	NA
chr11	116674634	116674664	35975[gene=ENSMUSG00000075410][PH=63][PH0=0.19][P=1.0e-100]	63	+	5	ENSMUSG00000020812	1810032O08Rik	3'UTR|intron	protein_coding	NOVEL	NA	NA
chr11	116674189	116674219	35953[gene=ENSMUSG00000075410][PH=55][PH0=0.19][P=1.0e-100]	55	+	5	ENSMUSG00000020812	1810032O08Rik	3'UTR|intron	protein_coding	NOVEL	NA	NA
chr11	70941364	70941394	20142[gene=ENSMUSG00000020817][PH=4][PH0=0.05][P=2.1e-03]	4	+	2	ENSMUSG00000020817	Rabep1	3'UTR	protein_coding	KNOWN	NA	NA
chr11	70940548	70940578	20106[gene=ENSMUSG00000020817][PH=24][PH0=0.05][P=3.2e-13]	24	+	5	ENSMUSG00000020817	Rabep1	3'UTR	protein_coding	KNOWN	NA	NA
chr11	78073459	78073489	21217[gene=ENSMUSG00000020832][PH=3][PH0=0.01][P=1.6e-04]	3	-	3	ENSMUSG00000020832	Eral1	3'UTR	protein_coding	KNOWN	NA	NA
chr11	75756816	75756846	22716[gene=ENSMUSG00000020849][PH=5][PH0=0.17][P=5.4e-03]	5	+	3	ENSMUSG00000020849	Ywhae	CDS|intron	protein_coding	KNOWN	NA	NA
chr11	75765461	75765491	22796[gene=ENSMUSG00000020849][PH=6][PH0=0.17][P=1.8e-04]	6	+	4	ENSMUSG00000020849	Ywhae	3'UTR	protein_coding	KNOWN	NA	NA
chr11	75765539	75765569	22821[gene=ENSMUSG00000020849][PH=22][PH0=0.17][P=1.0e-100]	22	+	4	ENSMUSG00000020849	Ywhae	3'UTR	protein_coding	KNOWN	NA	NA
chr11	75765809	75765839	22847[gene=ENSMUSG00000020849][PH=6][PH0=0.17][P=1.8e-04]	6	+	2	ENSMUSG00000020849	Ywhae	3'UTR	protein_coding	KNOWN	NA	NA
chr11	75764850	75764880	22768[gene=ENSMUSG00000020849][PH=6][PH0=0.17][P=1.8e-04]	6	+	3	ENSMUSG00000020849	Ywhae	3'UTR	protein_coding	KNOWN	NA	NA
chr11	75506715	75506745	22052[gene=ENSMUSG00000020850][PH=9][PH0=0.09][P=7.7e-12]	9	+	4	ENSMUSG00000020850	Prpf8	CDS	protein_coding	KNOWN	NA	NA
chr11	75490675	75490705	21957[gene=ENSMUSG00000020850][PH=8][PH0=0.09][P=6.8e-10]	8	+	2	ENSMUSG00000020850	Prpf8	CDS	protein_coding	KNOWN	NA	NA
chr11	94123180	94123210	29568[gene=ENSMUSG00000020859][PH=5][PH0=0.08][P=5.2e-04]	5	+	3	ENSMUSG00000020859	Spag9	3'UTR	protein_coding	KNOWN	NA	NA
chr11	94125622	94125652	29654[gene=ENSMUSG00000020859][PH=6][PH0=0.08][P=8.5e-06]	6	+	4	ENSMUSG00000020859	Spag9	3'UTR	protein_coding	KNOWN	NA	NA
chr11	94123249	94123279	29577[gene=ENSMUSG00000020859][PH=6][PH0=0.08][P=8.5e-06]	6	+	2	ENSMUSG00000020859	Spag9	3'UTR	protein_coding	KNOWN	NA	NA
chr11	94124420	94124450	29625[gene=ENSMUSG00000020859][PH=6][PH0=0.08][P=8.5e-06]	6	+	3	ENSMUSG00000020859	Spag9	3'UTR	protein_coding	KNOWN	NA	NA
chr11	94123431	94123461	29591[gene=ENSMUSG00000020859][PH=5][PH0=0.08][P=5.2e-04]	5	+	3	ENSMUSG00000020859	Spag9	3'UTR	protein_coding	KNOWN	NA	NA
chr11	94126039	94126069	29718[gene=ENSMUSG00000020859][PH=35][PH0=0.08][P=4.1e-13]	35	+	5	ENSMUSG00000020859	Spag9	3'UTR	protein_coding	KNOWN	NA	NA
chr11	94125874	94125904	29676[gene=ENSMUSG00000020859][PH=5][PH0=0.08][P=5.2e-04]	5	+	3	ENSMUSG00000020859	Spag9	3'UTR	protein_coding	KNOWN	NA	NA
chr11	94122967	94122997	29549[gene=ENSMUSG00000020859][PH=9][PH0=0.08][P=1.4e-11]	9	+	3	ENSMUSG00000020859	Spag9	3'UTR	protein_coding	KNOWN	NA	NA
chr11	94291409	94291439	28220[gene=ENSMUSG00000020863][PH=25][PH0=0.12][P=1.0e-100]	25	-	5	ENSMUSG00000020863	Luc7l3	3'UTR	protein_coding	KNOWN	NA	NA
chr11	94291309	94291339	28193[gene=ENSMUSG00000020863][PH=7][PH0=0.12][P=5.0e-07]	7	-	5	ENSMUSG00000020863	Luc7l3	3'UTR	protein_coding	KNOWN	NA	NA
chr11	94340248	94340278	29842[gene=ENSMUSG00000020864][PH=8][PH0=0.06][P=2.5e-11]	8	+	5	ENSMUSG00000020864	Ankrd40	3'UTR	protein_coding	KNOWN	NA	NA
chr11	94340979	94341009	29863[gene=ENSMUSG00000020864][PH=5][PH0=0.06][P=2.2e-05]	5	+	3	ENSMUSG00000020864	Ankrd40	3'UTR	protein_coding	KNOWN	NA	NA
chr11	94644218	94644248	29910[gene=ENSMUSG00000020869][PH=4][PH0=0.04][P=1.7e-04]	4	+	2	ENSMUSG00000020869	Lrrc59	3'UTR	protein_coding	KNOWN	NA	NA
chr11	95391646	95391676	30041[gene=ENSMUSG00000020873][PH=3][PH0=0.02][P=3.1e-03]	3	+	2	ENSMUSG00000020873	Slc35b1	3'UTR	protein_coding	KNOWN	NA	NA
chr11	95391576	95391606	30034[gene=ENSMUSG00000038893][PH=5][PH0=0.02][P=5.5e-07]	5	+	4	ENSMUSG00000020873	Slc35b1	3'UTR	protein_coding	KNOWN	NA	NA
chr11	70010066	70010096	19688[gene=ENSMUSG00000020888][PH=4][PH0=0.01][P=3.5e-06]	4	+	2	ENSMUSG00000020888	Dvl2	3'UTR	protein_coding	KNOWN	NA	NA
chr11	69109725	69109755	19282[gene=ENSMUSG00000020893][PH=26][PH0=0.17][P=1.0e-100]	26	+	5	ENSMUSG00000020893	Per1	3'UTR	protein_coding	KNOWN	NA	NA
chr11	69109925	69109955	19320[gene=ENSMUSG00000020893][PH=42][PH0=0.17][P=1.0e-100]	42	+	4	ENSMUSG00000020893	Per1	3'UTR	protein_coding	KNOWN	NA	NA
chr11	69109232	69109262	19255[gene=ENSMUSG00000020893][PH=5][PH0=0.17][P=3.5e-03]	5	+	2	ENSMUSG00000020893	Per1	CDS|downstream 10K	protein_coding	KNOWN	NA	NA
chr11	69090807	69090837	19197[gene=ENSMUSG00000020894][PH=5][PH0=0.08][P=5.9e-05]	5	+	3	ENSMUSG00000020894	Vamp2	3'UTR	protein_coding	KNOWN	NA	NA
chr11	68985835	68985865	17527[gene=ENSMUSG00000020899][PH=17][PH0=0.06][P=1.9e-13]	17	-	4	ENSMUSG00000020899	Pfas	3'UTR	protein_coding	KNOWN	NA	NA
chr11	68986764	68986794	17557[gene=ENSMUSG00000020899][PH=4][PH0=0.06][P=2.3e-03]	4	-	3	ENSMUSG00000020899	Pfas	3'UTR	protein_coding	KNOWN	NA	NA
chr11	100477017	100477047	31054[gene=ENSMUSG00000020917][PH=5][PH0=0.04][P=7.5e-06]	5	-	3	ENSMUSG00000020917	Acly	3'UTR	protein_coding	KNOWN	NA	NA
chr11	100476547	100476577	31016[gene=ENSMUSG00000020917][PH=5][PH0=0.04][P=7.5e-06]	5	-	3	ENSMUSG00000020917	Acly	3'UTR	protein_coding	KNOWN	NA	NA
chr11	100476669	100476699	31029[gene=ENSMUSG00000020917][PH=4][PH0=0.04][P=7.3e-04]	4	-	3	ENSMUSG00000020917	Acly	3'UTR	protein_coding	KNOWN	NA	NA
chr11	100476949	100476979	31047[gene=ENSMUSG00000020917][PH=4][PH0=0.04][P=7.3e-04]	4	-	3	ENSMUSG00000020917	Acly	3'UTR	protein_coding	KNOWN	NA	NA
chr11	100780761	100780791	31376[gene=ENSMUSG00000020919][PH=5][PH0=0.12][P=2.2e-03]	5	-	3	ENSMUSG00000020919	Stat5b	3'UTR	protein_coding	KNOWN	NA	NA
chr11	100808393	100808423	31572[gene=ENSMUSG00000020919][PH=8][PH0=0.12][P=1.9e-08]	8	-	4	ENSMUSG00000020919	Stat5b	CDS	protein_coding	KNOWN	NA	NA
chr11	100780826	100780856	31388[gene=ENSMUSG00000020919][PH=9][PH0=0.12][P=3.0e-10]	9	-	5	ENSMUSG00000020919	Stat5b	3'UTR	protein_coding	KNOWN	NA	NA
chr11	100780732	100780762	31372[gene=ENSMUSG00000020919][PH=6][PH0=0.12][P=5.3e-05]	6	-	5	ENSMUSG00000020919	Stat5b	3'UTR	protein_coding	KNOWN	NA	NA
chr11	100781512	100781542	31430[gene=ENSMUSG00000020919][PH=33][PH0=0.12][P=1.0e-100]	33	-	5	ENSMUSG00000020919	Stat5b	3'UTR	protein_coding	KNOWN	NA	NA
chr11	102162582	102162612	32288[gene=ENSMUSG00000020922][PH=11][PH0=0.06][P=9.6e-14]	11	-	4	ENSMUSG00000020922	Lsm12	3'UTR	protein_coding	KNOWN	NA	NA
chr11	102162519	102162549	32274[gene=ENSMUSG00000020922][PH=4][PH0=0.06][P=1.5e-03]	4	-	3	ENSMUSG00000020922	Lsm12	3'UTR	protein_coding	KNOWN	NA	NA
chr11	102306003	102306033	32477[gene=ENSMUSG00000020923][PH=4][PH0=0.04][P=2.4e-04]	4	-	3	ENSMUSG00000020923	Ubtf	3'UTR	protein_coding	KNOWN	NA	NA
chr11	102686219	102686249	32816[gene=ENSMUSG00000020925][PH=4][PH0=0.02][P=3.6e-05]	4	-	3	ENSMUSG00000020925	Ccdc43	3'UTR	protein_coding	KNOWN	NA	NA
chr12	64942776	64942806	6212[gene=ENSMUSG00000020948][PH=10][PH0=0.09][P=1.0e-100]	10	-	4	ENSMUSG00000020948	Klhl28	3'UTR	protein_coding	KNOWN	NA	NA
chr12	65062435	65062465	6269[gene=ENSMUSG00000020949][PH=4][PH0=0.05][P=6.0e-04]	4	-	3	ENSMUSG00000020949	Fkbp3	3'UTR	protein_coding	KNOWN	NA	NA
chr12	51390359	51390389	7360[gene=ENSMUSG00000020952][PH=7][PH0=0.02][P=3.6e-12]	7	+	5	ENSMUSG00000020952	Scfd1	CDS	protein_coding	KNOWN	NA	NA
chr12	51609079	51609109	3510[gene=ENSMUSG00000020954][PH=18][PH0=0.09][P=1.0e-100]	18	-	4	ENSMUSG00000020954	Strn3	3'UTR	protein_coding	KNOWN	NA	NA
chr12	51609188	51609218	3539[gene=ENSMUSG00000020954][PH=5][PH0=0.09][P=4.8e-04]	5	-	4	ENSMUSG00000020954	Strn3	3'UTR	protein_coding	KNOWN	NA	NA
chr12	51994479	51994509	4325[gene=ENSMUSG00000020956][PH=3][PH0=0.01][P=4.5e-04]	3	-	2	ENSMUSG00000020956	Dtd2	downstream 10K|intron	protein_coding	KNOWN	NA	NA
chr12	91573493	91573523	11847[gene=ENSMUSG00000020962][PH=4][PH0=0.06][P=2.0e-03]	4	-	4	ENSMUSG00000020962	Gtf2a1	intron	protein_coding	KNOWN	NA	NA
chr12	91556953	91556983	11798[gene=ENSMUSG00000020962][PH=4][PH0=0.06][P=2.0e-03]	4	-	3	ENSMUSG00000020962	Gtf2a1	3'UTR	protein_coding	KNOWN	NA	NA
chr12	91573474	91573504	11845[gene=ENSMUSG00000020962][PH=4][PH0=0.06][P=2.0e-03]	4	-	4	ENSMUSG00000020962	Gtf2a1	intron	protein_coding	KNOWN	NA	NA
chr12	91557596	91557626	11810[gene=ENSMUSG00000020962][PH=4][PH0=0.06][P=2.0e-03]	4	-	3	ENSMUSG00000020962	Gtf2a1	3'UTR	protein_coding	KNOWN	NA	NA
chr12	91556698	91556728	11786[gene=ENSMUSG00000020962][PH=4][PH0=0.06][P=2.0e-03]	4	-	3	ENSMUSG00000020962	Gtf2a1	3'UTR	protein_coding	KNOWN	NA	NA
chr12	91573435	91573465	11840[gene=ENSMUSG00000020962][PH=4][PH0=0.06][P=2.0e-03]	4	-	3	ENSMUSG00000020962	Gtf2a1	intron	protein_coding	KNOWN	NA	NA
chr12	91806155	91806185	11912[gene=ENSMUSG00000020964][PH=4][PH0=0.03][P=2.6e-04]	4	-	3	ENSMUSG00000020964	Sel1l	3'UTR	protein_coding	KNOWN	NA	NA
chr12	91806116	91806146	11910[gene=ENSMUSG00000020964][PH=4][PH0=0.03][P=2.6e-04]	4	-	2	ENSMUSG00000020964	Sel1l	3'UTR	protein_coding	KNOWN	NA	NA
chr12	91806264	91806294	11923[gene=ENSMUSG00000020964][PH=5][PH0=0.03][P=2.1e-06]	5	-	2	ENSMUSG00000020964	Sel1l	3'UTR	protein_coding	KNOWN	NA	NA
chr12	58959604	58959634	5877[gene=ENSMUSG00000020986][PH=4][PH0=0.02][P=4.5e-05]	4	-	1	ENSMUSG00000020986	Sec23a	3'UTR	protein_coding	KNOWN	NA	NA
chr12	58959385	58959415	5867[gene=ENSMUSG00000020986][PH=4][PH0=0.02][P=4.5e-05]	4	-	3	ENSMUSG00000020986	Sec23a	3'UTR	protein_coding	KNOWN	NA	NA
chr12	58959055	58959085	5855[gene=ENSMUSG00000020986][PH=3][PH0=0.02][P=6.7e-03]	3	-	3	ENSMUSG00000020986	Sec23a	3'UTR	protein_coding	KNOWN	NA	NA
chr12	59043176	59043206	5921[gene=ENSMUSG00000020993][PH=5][PH0=0.04][P=2.6e-06]	5	-	3	ENSMUSG00000020993	Trappc6b	3'UTR	protein_coding	KNOWN	NA	NA
chr12	59073680	59073710	8303[gene=ENSMUSG00000020994][PH=5][PH0=0.15][P=1.3e-03]	5	+	3	ENSMUSG00000020994	Pnn	3'UTR	protein_coding	KNOWN	NA	NA
chr12	59073185	59073215	8292[gene=ENSMUSG00000020994][PH=5][PH0=0.15][P=1.3e-03]	5	+	2	ENSMUSG00000020994	Pnn	3'UTR	protein_coding	KNOWN	NA	NA
chr12	59073226	59073256	8295[gene=ENSMUSG00000020994][PH=5][PH0=0.15][P=1.3e-03]	5	+	1	ENSMUSG00000020994	Pnn	3'UTR	protein_coding	KNOWN	NA	NA
chr12	59072992	59073022	8266[gene=ENSMUSG00000020994][PH=22][PH0=0.15][P=1.0e-100]	22	+	4	ENSMUSG00000020994	Pnn	3'UTR	protein_coding	KNOWN	NA	NA
chr12	59190046	59190076	8520[gene=ENSMUSG00000021000][PH=13][PH0=0.06][P=1.0e-100]	13	+	4	ENSMUSG00000021000	Ctage5	3'UTR	protein_coding	KNOWN	NA	NA
chr12	55489587	55489617	5100[gene=ENSMUSG00000021025][PH=172][PH0=2.21][P=1.0e-100]	172	-	5	ENSMUSG00000021025	Nfkbia	3'UTR	protein_coding	KNOWN	NA	NA
chr12	55489846	55489876	5212[gene=ENSMUSG00000021025][PH=35][PH0=2.21][P=1.0e-100]	35	-	5	ENSMUSG00000021025	Nfkbia	3'UTR	protein_coding	KNOWN	NA	NA
chr12	55489713	55489743	5161[gene=ENSMUSG00000021025][PH=17][PH0=2.21][P=1.2e-06]	17	-	5	ENSMUSG00000021025	Nfkbia	3'UTR	protein_coding	KNOWN	NA	NA
chr12	55489413	55489443	4976[gene=ENSMUSG00000021025][PH=375][PH0=2.21][P=1.0e-100]	375	-	5	ENSMUSG00000021025	Nfkbia	3'UTR	protein_coding	KNOWN	NA	NA
chr12	55776036	55776066	5688[gene=ENSMUSG00000021027][PH=5][PH0=0.04][P=2.1e-05]	5	-	3	ENSMUSG00000021027	Ralgapa1	CDS	protein_coding	KNOWN	NA	NA
chr12	55747117	55747147	5630[gene=ENSMUSG00000021027][PH=6][PH0=0.04][P=1.7e-07]	6	-	3	ENSMUSG00000021027	Ralgapa1	CDS	protein_coding	KNOWN	NA	NA
chr12	55602897	55602927	5308[gene=ENSMUSG00000021027][PH=4][PH0=0.04][P=2.2e-03]	4	-	1	ENSMUSG00000021027	Ralgapa1	3'UTR	protein_coding	KNOWN	NA	NA
chr12	55712204	55712234	5571[gene=ENSMUSG00000021027][PH=6][PH0=0.04][P=1.7e-07]	6	-	3	ENSMUSG00000021027	Ralgapa1	intron	protein_coding	KNOWN	NA	NA
chr12	55603917	55603947	5344[gene=ENSMUSG00000021027][PH=5][PH0=0.04][P=2.1e-05]	5	-	3	ENSMUSG00000021027	Ralgapa1	3'UTR	protein_coding	KNOWN	NA	NA
chr12	56328325	56328355	5780[gene=ENSMUSG00000021028][PH=4][PH0=0.03][P=6.6e-05]	4	-	3	ENSMUSG00000021028	Mbip	3'UTR	protein_coding	KNOWN	NA	NA
chr12	75453288	75453318	7136[gene=ENSMUSG00000021051][PH=4][PH0=0.04][P=2.4e-03]	4	-	3	ENSMUSG00000021051	Ppp2r5e	3'UTR	protein_coding	KNOWN	NA	NA
chr12	75714269	75714299	7547[gene=ENSMUSG00000021054][PH=8][PH0=0.07][P=1.2e-10]	8	-	5	ENSMUSG00000021054	Sgpp1	3'UTR	protein_coding	KNOWN	NA	NA
chr12	75716594	75716624	7630[gene=ENSMUSG00000021054][PH=5][PH0=0.07][P=6.7e-05]	5	-	2	ENSMUSG00000021054	Sgpp1	CDS	protein_coding	KNOWN	NA	NA
chr12	75714852	75714882	7575[gene=ENSMUSG00000021054][PH=4][PH0=0.07][P=3.6e-03]	4	-	4	ENSMUSG00000021054	Sgpp1	3'UTR	protein_coding	KNOWN	NA	NA
chr12	75715183	75715213	7596[gene=ENSMUSG00000021054][PH=12][PH0=0.07][P=1.0e-100]	12	-	4	ENSMUSG00000021054	Sgpp1	3'UTR	protein_coding	KNOWN	NA	NA
chr12	70467054	70467084	9459[gene=ENSMUSG00000021072][PH=4][PH0=0.07][P=3.0e-03]	4	+	1	ENSMUSG00000021072	Tmx1	3'UTR	protein_coding	KNOWN	NA	NA
chr12	70466438	70466468	9421[gene=ENSMUSG00000021072][PH=9][PH0=0.07][P=1.0e-12]	9	+	4	ENSMUSG00000021072	Tmx1	3'UTR	protein_coding	KNOWN	NA	NA
chr12	70466185	70466215	9397[gene=ENSMUSG00000021072][PH=4][PH0=0.07][P=3.0e-03]	4	+	3	ENSMUSG00000021072	Tmx1	3'UTR	protein_coding	KNOWN	NA	NA
chr12	70466997	70467027	9450[gene=ENSMUSG00000021072][PH=5][PH0=0.07][P=5.6e-05]	5	+	4	ENSMUSG00000021072	Tmx1	3'UTR	protein_coding	KNOWN	NA	NA
chr12	71123207	71123237	6921[gene=ENSMUSG00000021079][PH=8][PH0=0.09][P=7.2e-10]	8	-	4	ENSMUSG00000021079	Timm9	3'UTR	protein_coding	KNOWN	NA	NA
chr12	71123618	71123648	6945[gene=ENSMUSG00000021079][PH=10][PH0=0.09][P=6.9e-14]	10	-	4	ENSMUSG00000021079	Timm9	CDS	protein_coding	KNOWN	NA	NA
chr12	72794048	72794078	10120[gene=ENSMUSG00000021096][PH=7][PH0=0.06][P=3.3e-09]	7	+	3	ENSMUSG00000021096	Ppm1a	3'UTR	protein_coding	KNOWN	NA	NA
chr12	72784142	72784172	10066[gene=ENSMUSG00000021096][PH=4][PH0=0.06][P=2.0e-03]	4	+	3	ENSMUSG00000021096	Ppm1a	CDS	protein_coding	KNOWN	NA	NA
chr12	73760031	73760061	11942[gene=ENSMUSG00000021108][PH=6][PH0=0.19][P=1.8e-03]	6	+	5	ENSMUSG00000021108	Prkch	intron	protein_coding	KNOWN	NA	NA
chr12	73778053	73778083	12222[gene=ENSMUSG00000021108][PH=41][PH0=0.19][P=6.0e-13]	41	+	4	ENSMUSG00000021108	Prkch	3'UTR	protein_coding	KNOWN	NA	NA
chr12	73777682	73777712	12143[gene=ENSMUSG00000021108][PH=42][PH0=0.19][P=6.0e-13]	42	+	4	ENSMUSG00000021108	Prkch	3'UTR	protein_coding	KNOWN	NA	NA
chr12	73618404	73618434	10894[gene=ENSMUSG00000021108][PH=8][PH0=0.19][P=1.6e-06]	8	+	3	ENSMUSG00000021108	Prkch	intron	protein_coding	KNOWN	NA	NA
chr12	73946052	73946082	12708[gene=ENSMUSG00000021109][PH=58][PH0=0.27][P=1.0e-100]	58	+	5	ENSMUSG00000021109	Hif1a	3'UTR	protein_coding	KNOWN	NA	NA
chr12	73945826	73945856	12606[gene=ENSMUSG00000021109][PH=63][PH0=0.27][P=1.0e-100]	63	+	5	ENSMUSG00000021109	Hif1a	3'UTR	protein_coding	KNOWN	NA	NA
chr12	73946546	73946576	12801[gene=ENSMUSG00000021109][PH=6][PH0=0.27][P=3.5e-03]	6	+	3	ENSMUSG00000021109	Hif1a	3'UTR	protein_coding	KNOWN	NA	NA
chr12	73945921	73945951	12656[gene=ENSMUSG00000021109][PH=24][PH0=0.27][P=1.0e-100]	24	+	4	ENSMUSG00000021109	Hif1a	3'UTR	protein_coding	KNOWN	NA	NA
chr12	105837362	105837392	18930[gene=ENSMUSG00000021111][PH=8][PH0=0.14][P=3.9e-08]	8	+	4	ENSMUSG00000021111	Papola	3'UTR|intron	protein_coding	KNOWN	NA	NA
chr12	105837293	105837323	18918[gene=ENSMUSG00000021111][PH=6][PH0=0.14][P=8.6e-05]	6	+	4	ENSMUSG00000021111	Papola	3'UTR|intron	protein_coding	KNOWN	NA	NA
chr12	105838032	105838062	19003[gene=ENSMUSG00000021111][PH=5][PH0=0.14][P=3.1e-03]	5	+	3	ENSMUSG00000021111	Papola	3'UTR|intron	protein_coding	KNOWN	NA	NA
chr12	105837583	105837613	18963[gene=ENSMUSG00000021111][PH=24][PH0=0.14][P=1.0e-100]	24	+	4	ENSMUSG00000021111	Papola	3'UTR|intron	protein_coding	KNOWN	NA	NA
chr12	78837968	78837998	14193[gene=ENSMUSG00000021112][PH=5][PH0=0.03][P=1.4e-06]	5	+	3	ENSMUSG00000021112	Mpp5	3'UTR	protein_coding	KNOWN	NA	NA
chr12	78857306	78857336	8060[gene=ENSMUSG00000021114][PH=5][PH0=0.04][P=2.5e-06]	5	-	2	ENSMUSG00000021114	Atp6v1d	CDS	protein_coding	KNOWN	NA	NA
chr12	78843356	78843386	8040[gene=ENSMUSG00000021114][PH=6][PH0=0.04][P=1.9e-08]	6	-	4	ENSMUSG00000021114	Atp6v1d	3'UTR	protein_coding	KNOWN	NA	NA
chr12	78885971	78886001	14325[gene=ENSMUSG00000021116][PH=7][PH0=0.09][P=5.2e-08]	7	+	4	ENSMUSG00000021116	Eif2s1	3'UTR	protein_coding	KNOWN	NA	NA
chr12	80107786	80107816	8311[gene=ENSMUSG00000021127][PH=87][PH0=2.91][P=1.8e-13]	87	-	5	ENSMUSG00000021127	Zfp36l1	3'UTR	protein_coding	KNOWN	NA	NA
chr12	80108193	80108223	8495[gene=ENSMUSG00000021127][PH=512][PH0=2.91][P=1.8e-13]	512	-	5	ENSMUSG00000021127	Zfp36l1	3'UTR	protein_coding	KNOWN	NA	NA
chr12	80107907	80107937	8358[gene=ENSMUSG00000021127][PH=14][PH0=2.91][P=8.6e-03]	14	-	3	ENSMUSG00000021127	Zfp36l1	3'UTR	protein_coding	KNOWN	NA	NA
chr12	80108403	80108433	8645[gene=ENSMUSG00000021127][PH=60][PH0=2.91][P=1.8e-13]	60	-	5	ENSMUSG00000021127	Zfp36l1	3'UTR	protein_coding	KNOWN	NA	NA
chr12	80108033	80108063	8410[gene=ENSMUSG00000021127][PH=79][PH0=2.91][P=1.8e-13]	79	-	5	ENSMUSG00000021127	Zfp36l1	3'UTR	protein_coding	KNOWN	NA	NA
chr12	80109246	80109276	8760[gene=ENSMUSG00000021127][PH=20][PH0=2.91][P=2.9e-07]	20	-	5	ENSMUSG00000021127	Zfp36l1	3'UTR	protein_coding	KNOWN	NA	NA
chr12	80880790	80880820	15187[gene=ENSMUSG00000021133][PH=93][PH0=0.17][P=1.0e-100]	93	+	5	ENSMUSG00000021133	4933426M11Rik	3'UTR	protein_coding	KNOWN	NA	NA
chr12	80878629	80878659	15055[gene=ENSMUSG00000021133][PH=11][PH0=0.17][P=1.5e-12]	11	+	4	ENSMUSG00000021133	4933426M11Rik	3'UTR	protein_coding	KNOWN	NA	NA
chr12	80948843	80948873	15266[gene=ENSMUSG00000021134][PH=8][PH0=0.17][P=4.2e-08]	8	+	3	ENSMUSG00000021134	Srsf5	downstream 10K|intron	protein_coding	KNOWN	NA	NA
chr12	80950467	80950497	15303[gene=ENSMUSG00000021134][PH=14][PH0=0.17][P=1.0e-100]	14	+	4	ENSMUSG00000021134	Srsf5	3'UTR	protein_coding	KNOWN	NA	NA
chr12	81499217	81499247	9877[gene=ENSMUSG00000021139][PH=4][PH0=0.03][P=5.8e-04]	4	-	3	ENSMUSG00000021139	Gm20498	3'UTR|intron	protein_coding	NOVEL	NA	NA
chr12	113137038	113137068	21561[gene=ENSMUSG00000021144][PH=10][PH0=0.03][P=1.0e-100]	10	+	5	ENSMUSG00000021144	Mta1	3'UTR	protein_coding	KNOWN	NA	NA
chr13	8804941	8804971	760[gene=ENSMUSG00000021147][PH=4][PH0=0.05][P=2.2e-03]	4	-	2	ENSMUSG00000021147	Wdr37	3'UTR	protein_coding	KNOWN	NA	NA
chr13	8972680	8972710	996[gene=ENSMUSG00000021149][PH=7][PH0=0.12][P=3.0e-07]	7	-	2	ENSMUSG00000021149	Gtpbp4	3'UTR	protein_coding	KNOWN	NA	NA
chr13	9685616	9685646	1192[gene=ENSMUSG00000021156][PH=8][PH0=0.04][P=3.5e-12]	8	-	4	ENSMUSG00000021156	Zmynd11	3'UTR	protein_coding	KNOWN	NA	NA
chr12	116370560	116370590	21996[gene=ENSMUSG00000021171][PH=5][PH0=0.11][P=1.8e-03]	5	+	3	ENSMUSG00000021171	Esyt2	3'UTR	protein_coding	KNOWN	NA	NA
chr12	116367760	116367790	21957[gene=ENSMUSG00000021171][PH=22][PH0=0.11][P=1.0e-100]	22	+	5	ENSMUSG00000021171	Esyt2	CDS	protein_coding	KNOWN	NA	NA
chr12	116370800	116370830	22010[gene=ENSMUSG00000021171][PH=5][PH0=0.11][P=1.8e-03]	5	+	4	ENSMUSG00000021171	Esyt2	3'UTR	protein_coding	KNOWN	NA	NA
chr12	116373053	116373083	22126[gene=ENSMUSG00000021171][PH=19][PH0=0.11][P=1.0e-100]	19	+	5	ENSMUSG00000021171	Esyt2	3'UTR	protein_coding	KNOWN	NA	NA
chr12	116372316	116372346	22063[gene=ENSMUSG00000021171][PH=18][PH0=0.11][P=1.0e-100]	18	+	5	ENSMUSG00000021171	Esyt2	3'UTR	protein_coding	KNOWN	NA	NA
chr12	100581780	100581810	15109[gene=ENSMUSG00000021180][PH=3][PH0=0.01][P=2.6e-03]	3	-	1	ENSMUSG00000021180	Rps6ka5	intron	protein_coding	KNOWN	NA	NA
chr12	101017720	101017750	15477[gene=ENSMUSG00000080575][PH=3][PH0=0.04][P=6.6e-03]	3	-	1	ENSMUSG00000021182	Ccdc88c	intron	protein_coding	KNOWN	NA	NA
chr12	101835756	101835786	15782[gene=ENSMUSG00000021188][PH=5][PH0=0.05][P=3.5e-05]	5	-	3	ENSMUSG00000021188	Trip11	3'UTR	protein_coding	KNOWN	NA	NA
chr12	101834210	101834240	15740[gene=ENSMUSG00000021188][PH=8][PH0=0.05][P=2.4e-11]	8	-	4	ENSMUSG00000021188	Trip11	3'UTR	protein_coding	KNOWN	NA	NA
chr12	101834279	101834309	15750[gene=ENSMUSG00000021188][PH=7][PH0=0.05][P=3.2e-09]	7	-	4	ENSMUSG00000021188	Trip11	3'UTR	protein_coding	KNOWN	NA	NA
chr12	101922083	101922113	16018[gene=ENSMUSG00000021189][PH=4][PH0=0.05][P=9.1e-04]	4	-	3	ENSMUSG00000021189	Atxn3	3'UTR	protein_coding	KNOWN	NA	NA
chr12	101921688	101921718	16005[gene=ENSMUSG00000021189][PH=4][PH0=0.05][P=9.1e-04]	4	-	3	ENSMUSG00000021189	Atxn3	3'UTR	protein_coding	KNOWN	NA	NA
chr12	102497685	102497715	18461[gene=ENSMUSG00000021192][PH=6][PH0=0.03][P=6.2e-09]	6	+	5	ENSMUSG00000021192	Golga5	3'UTR	protein_coding	KNOWN	NA	NA
chr13	6563432	6563462	357[gene=ENSMUSG00000021193][PH=4][PH0=0.04][P=4.7e-04]	4	+	3	ENSMUSG00000021193	Pitrm1	CDS	protein_coding	KNOWN	NA	NA
chr13	6581355	6581385	587[gene=ENSMUSG00000021196][PH=36][PH0=0.04][P=1.0e-100]	36	-	5	ENSMUSG00000021196	Pfkp	3'UTR	protein_coding	KNOWN	NA	NA
chr13	3882622	3882652	458[gene=ENSMUSG00000021215][PH=3][PH0=0.02][P=5.2e-03]	3	-	2	ENSMUSG00000021215	Net1	3'UTR	protein_coding	KNOWN	NA	NA
chr13	3882806	3882836	464[gene=ENSMUSG00000021215][PH=4][PH0=0.02][P=3.6e-05]	4	-	3	ENSMUSG00000021215	Net1	3'UTR	protein_coding	KNOWN	NA	NA
chr13	3882995	3883025	472[gene=ENSMUSG00000021215][PH=4][PH0=0.02][P=3.6e-05]	4	-	4	ENSMUSG00000021215	Net1	3'UTR	protein_coding	KNOWN	NA	NA
chr12	84774846	84774876	16662[gene=ENSMUSG00000021241][PH=10][PH0=0.07][P=3.5e-14]	10	+	5	ENSMUSG00000021241	Isca2	3'UTR	protein_coding	KNOWN	NA	NA
chr12	84757168	84757198	10832[gene=ENSMUSG00000021242][PH=3][PH0=0.02][P=2.3e-03]	3	-	2	ENSMUSG00000021242	Npc2	CDS	protein_coding	KNOWN	NA	NA
chr12	85070288	85070318	16875[gene=ENSMUSG00000021244][PH=4][PH0=0.04][P=9.4e-04]	4	+	3	ENSMUSG00000021244	Ylpm1	3'UTR	protein_coding	KNOWN	NA	NA
chr12	85234760	85234790	10975[gene=ENSMUSG00000021245][PH=3][PH0=0.01][P=3.3e-04]	3	-	2	ENSMUSG00000021245	Mlh3	3'UTR	protein_coding	KNOWN	NA	NA
chr12	85477172	85477202	17083[gene=ENSMUSG00000021250][PH=83][PH0=0.43][P=1.0e-100]	83	+	5	ENSMUSG00000021250	Fos	3'UTR	protein_coding	KNOWN	NA	NA
chr12	85815468	85815498	11142[gene=ENSMUSG00000021252][PH=3][PH0=0.03][P=9.1e-03]	3	-	3	ENSMUSG00000021252	0610007P14Rik	3'UTR	protein_coding	KNOWN	NA	NA
chr12	86290715	86290745	17327[gene=ENSMUSG00000021254][PH=10][PH0=0.04][P=1.0e-100]	10	+	3	ENSMUSG00000021254	Gpatch2l	3'UTR	protein_coding	KNOWN	NA	NA
chr12	108203269	108203299	19184[gene=ENSMUSG00000021258][PH=6][PH0=0.03][P=2.8e-09]	6	+	2	ENSMUSG00000021258	Ccnk	3'UTR	protein_coding	KNOWN	NA	NA
chr12	108688277	108688307	19381[gene=ENSMUSG00000021262][PH=24][PH0=0.03][P=1.0e-100]	24	+	5	ENSMUSG00000021262	Evl	3'UTR	protein_coding	KNOWN	NA	NA
chr12	108815805	108815835	19504[gene=ENSMUSG00000021264][PH=5][PH0=0.09][P=2.2e-04]	5	+	2	ENSMUSG00000021264	Yy1	3'UTR	protein_coding	KNOWN	NA	NA
chr12	108816360	108816390	19527[gene=ENSMUSG00000021264][PH=4][PH0=0.09][P=9.4e-03]	4	+	2	ENSMUSG00000021264	Yy1	3'UTR	protein_coding	KNOWN	NA	NA
chr12	111262710	111262740	20790[gene=ENSMUSG00000021277][PH=6][PH0=0.07][P=2.8e-06]	6	+	3	ENSMUSG00000021277	Traf3	3'UTR	protein_coding	KNOWN	NA	NA
chr12	111262642	111262672	20779[gene=ENSMUSG00000021277][PH=5][PH0=0.07][P=2.0e-04]	5	+	3	ENSMUSG00000021277	Traf3	3'UTR	protein_coding	KNOWN	NA	NA
chr12	111267068	111267098	20811[gene=ENSMUSG00000021277][PH=5][PH0=0.07][P=2.0e-04]	5	+	3	ENSMUSG00000021277	Traf3	3'UTR	protein_coding	KNOWN	NA	NA
chr12	111262670	111262700	20781[gene=ENSMUSG00000021277][PH=5][PH0=0.07][P=2.0e-04]	5	+	2	ENSMUSG00000021277	Traf3	3'UTR	protein_coding	KNOWN	NA	NA
chr12	111541037	111541067	20923[gene=ENSMUSG00000021282][PH=213][PH0=0.59][P=1.0e-100]	213	+	5	ENSMUSG00000021282	Eif5	intron	protein_coding	KNOWN	NA	NA
chr13	14053076	14053106	1622[gene=ENSMUSG00000021302][PH=11][PH0=0.06][P=6.2e-14]	11	-	4	ENSMUSG00000021302	Ggps1	3'UTR	protein_coding	KNOWN	NA	NA
chr13	24992798	24992828	3044[gene=ENSMUSG00000021339][PH=4][PH0=0.03][P=9.8e-05]	4	-	4	ENSMUSG00000021339	Mrs2	3'UTR	protein_coding	KNOWN	NA	NA
chr13	30764980	30765010	6393[gene=ENSMUSG00000021356][PH=42][PH0=1.83][P=1.0e-100]	42	+	5	ENSMUSG00000021356	Irf4	3'UTR	protein_coding	KNOWN	NA	NA
chr13	30765576	30765606	6566[gene=ENSMUSG00000021356][PH=22][PH0=1.83][P=1.1e-12]	22	+	5	ENSMUSG00000021356	Irf4	3'UTR	protein_coding	KNOWN	NA	NA
chr13	30765201	30765231	6499[gene=ENSMUSG00000021356][PH=12][PH0=1.83][P=3.5e-03]	12	+	3	ENSMUSG00000021356	Irf4	3'UTR	protein_coding	KNOWN	NA	NA
chr13	30764902	30764932	6347[gene=ENSMUSG00000021356][PH=53][PH0=1.83][P=1.0e-100]	53	+	5	ENSMUSG00000021356	Irf4	3'UTR	protein_coding	KNOWN	NA	NA
chr13	30766252	30766282	6671[gene=ENSMUSG00000021356][PH=33][PH0=1.83][P=1.0e-100]	33	+	5	ENSMUSG00000021356	Irf4	3'UTR	protein_coding	KNOWN	NA	NA
chr13	30764612	30764642	6276[gene=ENSMUSG00000021356][PH=16][PH0=1.83][P=1.2e-06]	16	+	5	ENSMUSG00000021356	Irf4	3'UTR	protein_coding	KNOWN	NA	NA
chr13	30764398	30764428	6233[gene=ENSMUSG00000021356][PH=17][PH0=1.83][P=1.4e-07]	17	+	4	ENSMUSG00000021356	Irf4	3'UTR	protein_coding	KNOWN	NA	NA
chr13	30764015	30764045	6135[gene=ENSMUSG00000021356][PH=95][PH0=1.83][P=1.0e-100]	95	+	5	ENSMUSG00000021356	Irf4	3'UTR	protein_coding	KNOWN	NA	NA
chr13	30764516	30764546	6257[gene=ENSMUSG00000021356][PH=12][PH0=1.83][P=3.5e-03]	12	+	4	ENSMUSG00000021356	Irf4	3'UTR	protein_coding	KNOWN	NA	NA
chr13	30765143	30765173	6460[gene=ENSMUSG00000021356][PH=36][PH0=1.83][P=1.0e-100]	36	+	5	ENSMUSG00000021356	Irf4	3'UTR	protein_coding	KNOWN	NA	NA
chr13	30766416	30766446	6748[gene=ENSMUSG00000021356][PH=254][PH0=1.83][P=1.0e-100]	254	+	5	ENSMUSG00000021356	Irf4	3'UTR	protein_coding	KNOWN	NA	NA
chr13	30764683	30764713	6298[gene=ENSMUSG00000021356][PH=13][PH0=1.83][P=5.4e-04]	13	+	4	ENSMUSG00000021356	Irf4	3'UTR	protein_coding	KNOWN	NA	NA
chr13	30815112	30815142	4136[gene=ENSMUSG00000021357][PH=5][PH0=0.05][P=4.3e-05]	5	-	3	ENSMUSG00000021357	Exoc2	3'UTR	protein_coding	KNOWN	NA	NA
chr13	30814187	30814217	4107[gene=ENSMUSG00000021357][PH=13][PH0=0.05][P=1.0e-100]	13	-	3	ENSMUSG00000021357	Exoc2	3'UTR	protein_coding	KNOWN	NA	NA
chr13	30819790	30819820	4160[gene=ENSMUSG00000021357][PH=7][PH0=0.05][P=3.2e-09]	7	-	1	ENSMUSG00000021357	Exoc2	intron	protein_coding	KNOWN	NA	NA
chr13	41311342	41311372	5731[gene=ENSMUSG00000021365][PH=4][PH0=0.04][P=1.7e-03]	4	-	3	ENSMUSG00000021365	Nedd9	3'UTR	protein_coding	KNOWN	NA	NA
chr13	41311536	41311566	5752[gene=ENSMUSG00000021365][PH=4][PH0=0.04][P=1.7e-03]	4	-	3	ENSMUSG00000021365	Nedd9	3'UTR	protein_coding	KNOWN	NA	NA
chr13	42059030	42059060	8909[gene=ENSMUSG00000021366][PH=6][PH0=0.10][P=2.9e-05]	6	+	4	ENSMUSG00000021366	Hivep1	intron	protein_coding	KNOWN	NA	NA
chr13	43538803	43538833	7162[gene=ENSMUSG00000021371][PH=3][PH0=0.03][P=8.2e-03]	3	-	3	ENSMUSG00000021371	Mcur1	3'UTR	protein_coding	KNOWN	NA	NA
chr13	43538644	43538674	7154[gene=ENSMUSG00000021371][PH=3][PH0=0.03][P=8.2e-03]	3	-	2	ENSMUSG00000021371	Mcur1	3'UTR	protein_coding	KNOWN	NA	NA
chr13	43541498	43541528	7181[gene=ENSMUSG00000021371][PH=6][PH0=0.03][P=2.8e-09]	6	-	4	ENSMUSG00000021371	Mcur1	3'UTR	protein_coding	KNOWN	NA	NA
chr13	46680668	46680698	7933[gene=ENSMUSG00000021374][PH=6][PH0=0.20][P=6.3e-04]	6	-	3	ENSMUSG00000021374	Nup153	3'UTR	protein_coding	KNOWN	NA	NA
chr13	46680641	46680671	7924[gene=ENSMUSG00000021374][PH=11][PH0=0.20][P=6.7e-12]	11	-	4	ENSMUSG00000021374	Nup153	3'UTR	protein_coding	KNOWN	NA	NA
chr13	46680745	46680775	7950[gene=ENSMUSG00000021374][PH=12][PH0=0.20][P=1.1e-16]	12	-	5	ENSMUSG00000021374	Nup153	3'UTR	protein_coding	KNOWN	NA	NA
chr13	46680485	46680515	7893[gene=ENSMUSG00000021374][PH=30][PH0=0.20][P=1.0e-100]	30	-	5	ENSMUSG00000021374	Nup153	3'UTR	protein_coding	KNOWN	NA	NA
chr13	46680380	46680410	7847[gene=ENSMUSG00000021374][PH=10][PH0=0.20][P=3.3e-10]	10	-	3	ENSMUSG00000021374	Nup153	3'UTR	protein_coding	KNOWN	NA	NA
chr13	46704378	46704408	8187[gene=ENSMUSG00000021374][PH=7][PH0=0.20][P=2.1e-05]	7	-	3	ENSMUSG00000021374	Nup153	intron	protein_coding	KNOWN	NA	NA
chr13	47085815	47085845	8432[gene=ENSMUSG00000021377][PH=6][PH0=0.08][P=1.4e-06]	6	-	3	ENSMUSG00000021377	Dek	3'UTR	protein_coding	KNOWN	NA	NA
chr13	47085901	47085931	8441[gene=ENSMUSG00000021377][PH=4][PH0=0.08][P=4.7e-03]	4	-	4	ENSMUSG00000021377	Dek	3'UTR	protein_coding	KNOWN	NA	NA
chr13	47085670	47085700	8421[gene=ENSMUSG00000021377][PH=4][PH0=0.08][P=4.7e-03]	4	-	1	ENSMUSG00000021377	Dek	3'UTR	protein_coding	KNOWN	NA	NA
chr13	47085211	47085241	8398[gene=ENSMUSG00000021377][PH=6][PH0=0.08][P=1.4e-06]	6	-	3	ENSMUSG00000021377	Dek	3'UTR	protein_coding	KNOWN	NA	NA
chr13	47085087	47085117	8382[gene=ENSMUSG00000021377][PH=4][PH0=0.08][P=4.7e-03]	4	-	4	ENSMUSG00000021377	Dek	3'UTR	protein_coding	KNOWN	NA	NA
chr13	49462817	49462847	11027[gene=ENSMUSG00000021385][PH=4][PH0=0.02][P=8.4e-05]	4	+	2	ENSMUSG00000021385	Ippk	3'UTR	protein_coding	KNOWN	NA	NA
chr13	49462854	49462884	11034[gene=ENSMUSG00000021385][PH=6][PH0=0.02][P=2.6e-09]	6	+	4	ENSMUSG00000021385	Ippk	3'UTR	protein_coding	KNOWN	NA	NA
chr13	49678811	49678841	11165[gene=ENSMUSG00000021392][PH=5][PH0=0.10][P=2.9e-04]	5	+	3	ENSMUSG00000021392	Nol8	3'UTR	protein_coding	KNOWN	NA	NA
chr13	32822468	32822498	7039[gene=ENSMUSG00000021400][PH=3][PH0=0.02][P=4.3e-03]	3	+	2	ENSMUSG00000021400	Wrnip1	3'UTR	protein_coding	KNOWN	NA	NA
chr13	32822436	32822466	7035[gene=ENSMUSG00000021400][PH=3][PH0=0.02][P=4.3e-03]	3	+	2	ENSMUSG00000021400	Wrnip1	3'UTR	protein_coding	KNOWN	NA	NA
chr13	34902177	34902207	7312[gene=ENSMUSG00000021413][PH=5][PH0=0.09][P=1.9e-04]	5	+	4	ENSMUSG00000021413	Prpf4b	3'UTR	protein_coding	KNOWN	NA	NA
chr13	34902724	34902754	7342[gene=ENSMUSG00000021413][PH=4][PH0=0.09][P=8.8e-03]	4	+	2	ENSMUSG00000021413	Prpf4b	3'UTR	protein_coding	KNOWN	NA	NA
chr13	34901676	34901706	7297[gene=ENSMUSG00000021413][PH=5][PH0=0.09][P=1.9e-04]	5	+	3	ENSMUSG00000021413	Prpf4b	3'UTR	protein_coding	KNOWN	NA	NA
chr13	37979496	37979526	5175[gene=ENSMUSG00000021427][PH=7][PH0=0.09][P=6.6e-08]	7	-	4	ENSMUSG00000021427	Ssr1	3'UTR	protein_coding	KNOWN	NA	NA
chr13	37978659	37978689	5125[gene=ENSMUSG00000021427][PH=8][PH0=0.09][P=8.9e-10]	8	-	3	ENSMUSG00000021427	Ssr1	3'UTR	protein_coding	KNOWN	NA	NA
chr13	37978843	37978873	5141[gene=ENSMUSG00000021427][PH=4][PH0=0.09][P=9.7e-03]	4	-	3	ENSMUSG00000021427	Ssr1	3'UTR	protein_coding	KNOWN	NA	NA
chr13	37979327	37979357	5161[gene=ENSMUSG00000021427][PH=7][PH0=0.09][P=6.6e-08]	7	-	3	ENSMUSG00000021427	Ssr1	3'UTR	protein_coding	KNOWN	NA	NA
chr13	38061082	38061112	8380[gene=ENSMUSG00000021428][PH=12][PH0=0.03][P=1.0e-100]	12	+	4	ENSMUSG00000021428	Riok1	3'UTR	protein_coding	KNOWN	NA	NA
chr13	38932371	38932401	5566[gene=ENSMUSG00000021432][PH=4][PH0=0.05][P=1.3e-03]	4	-	3	ENSMUSG00000021432	Slc35b3	3'UTR	protein_coding	KNOWN	NA	NA
chr13	51702088	51702118	9360[gene=ENSMUSG00000021451][PH=11][PH0=0.06][P=3.0e-13]	11	-	4	ENSMUSG00000021451	Sema4d	3'UTR	protein_coding	KNOWN	NA	NA
chr13	51702256	51702286	9383[gene=ENSMUSG00000021451][PH=8][PH0=0.06][P=4.6e-11]	8	-	4	ENSMUSG00000021451	Sema4d	3'UTR	protein_coding	KNOWN	NA	NA
chr13	51702028	51702058	9342[gene=ENSMUSG00000021451][PH=12][PH0=0.06][P=3.0e-13]	12	-	3	ENSMUSG00000021451	Sema4d	3'UTR	protein_coding	KNOWN	NA	NA
chr13	51701258	51701288	9294[gene=ENSMUSG00000021451][PH=4][PH0=0.06][P=4.0e-03]	4	-	2	ENSMUSG00000021451	Sema4d	3'UTR	protein_coding	KNOWN	NA	NA
chr13	51701802	51701832	9313[gene=ENSMUSG00000021451][PH=15][PH0=0.06][P=3.0e-13]	15	-	4	ENSMUSG00000021451	Sema4d	3'UTR	protein_coding	KNOWN	NA	NA
chr13	63300526	63300556	13527[gene=ENSMUSG00000021458][PH=15][PH0=0.01][P=9.4e-13]	15	+	4	ENSMUSG00000021458	2010111I01Rik	downstream 10K|intron	protein_coding	KNOWN	NA	NA
chr13	63248790	63248820	13399[gene=ENSMUSG00000021458][PH=3][PH0=0.01][P=8.3e-03]	3	+	2	ENSMUSG00000021458	2010111I01Rik	intron	protein_coding	KNOWN	NA	NA
chr13	52835127	52835157	9582[gene=ENSMUSG00000021460][PH=4][PH0=0.01][P=1.3e-05]	4	-	3	ENSMUSG00000021460	Auh	3'UTR	protein_coding	KNOWN	NA	NA
chr13	53354190	53354220	9740[gene=ENSMUSG00000021468][PH=9][PH0=0.04][P=1.0e-100]	9	-	4	ENSMUSG00000021468	Sptlc1	CDS	protein_coding	KNOWN	NA	NA
chr13	53333241	53333271	9686[gene=ENSMUSG00000021468][PH=6][PH0=0.04][P=7.1e-08]	6	-	4	ENSMUSG00000021468	Sptlc1	3'UTR	protein_coding	KNOWN	NA	NA
chr13	63899614	63899644	13602[gene=ENSMUSG00000021470][PH=4][PH0=0.01][P=1.9e-05]	4	+	3	ENSMUSG00000021470	Ercc6l2	3'UTR	protein_coding	KNOWN	NA	NA
chr13	55315761	55315791	12361[gene=ENSMUSG00000021488][PH=8][PH0=0.05][P=1.7e-11]	8	+	3	ENSMUSG00000021488	Nsd1	3'UTR	protein_coding	KNOWN	NA	NA
chr13	55679281	55679311	12652[gene=ENSMUSG00000021500][PH=8][PH0=0.04][P=9.9e-13]	8	+	4	ENSMUSG00000021500	Ddx46	3'UTR	protein_coding	KNOWN	NA	NA
chr13	67619003	67619033	12638[gene=ENSMUSG00000021510][PH=3][PH0=0.02][P=2.0e-03]	3	-	3	ENSMUSG00000021510	A530054K11Rik	3'UTR	protein_coding	NOVEL	NA	NA
chr13	66997974	66998004	13817[gene=ENSMUSG00000021518][PH=4][PH0=0.03][P=4.5e-04]	4	+	3	ENSMUSG00000021518	Ptdss1	3'UTR	protein_coding	KNOWN	NA	NA
chr13	66912122	66912152	12258[gene=ENSMUSG00000021519][PH=5][PH0=0.04][P=4.8e-06]	5	-	3	ENSMUSG00000021519	Mterfd1	3'UTR|intron	protein_coding	KNOWN	NA	NA
chr13	56738730	56738760	13070[gene=ENSMUSG00000021540][PH=4][PH0=0.06][P=2.8e-03]	4	+	3	ENSMUSG00000021540	Smad5	3'UTR	protein_coding	KNOWN	NA	NA
chr13	58392802	58392832	11278[gene=ENSMUSG00000021546][PH=7][PH0=0.28][P=7.8e-05]	7	-	4	ENSMUSG00000021546	Hnrnpk	downstream 10K|intron	protein_coding	KNOWN	NA	NA
chr13	58391324	58391354	11177[gene=ENSMUSG00000021546][PH=27][PH0=0.28][P=1.0e-100]	27	-	5	ENSMUSG00000021546	Hnrnpk	3'UTR	protein_coding	KNOWN	NA	NA
chr13	58400909	58400939	11373[gene=ENSMUSG00000021546][PH=18][PH0=0.28][P=1.0e-100]	18	-	4	ENSMUSG00000021546	Hnrnpk	intron	protein_coding	KNOWN	NA	NA
chr13	85233648	85233678	14021[gene=ENSMUSG00000021549][PH=34][PH0=0.12][P=2.5e-13]	34	-	5	ENSMUSG00000021549	Rasa1	CDS	protein_coding	KNOWN	NA	NA
chr13	58381233	58381263	11127[gene=ENSMUSG00000021550][PH=3][PH0=0.02][P=1.5e-03]	3	-	2	ENSMUSG00000021550	2210016F16Rik	3'UTR	protein_coding	KNOWN	NA	NA
chr13	59453879	59453909	11422[gene=ENSMUSG00000021557][PH=4][PH0=0.02][P=5.1e-05]	4	-	3	ENSMUSG00000021557	Agtpbp1	3'UTR|intron	protein_coding	KNOWN	NA	NA
chr13	74303585	74303615	13242[gene=ENSMUSG00000021576][PH=6][PH0=0.04][P=1.8e-08]	6	-	3	ENSMUSG00000021576	Pdcd6	3'UTR	protein_coding	KNOWN	NA	NA
chr13	74322418	74322448	13285[gene=ENSMUSG00000021577][PH=4][PH0=0.05][P=6.9e-04]	4	-	3	ENSMUSG00000021577	Sdha	3'UTR	protein_coding	KNOWN	NA	NA
chr13	74359586	74359616	14414[gene=ENSMUSG00000021578][PH=3][PH0=0.03][P=8.4e-03]	3	+	2	ENSMUSG00000021578	Ccdc127	3'UTR|intron	protein_coding	KNOWN	NA	NA
chr13	74356980	74357010	14394[gene=ENSMUSG00000021578][PH=3][PH0=0.03][P=8.4e-03]	3	+	2	ENSMUSG00000021578	Ccdc127	CDS|intron	protein_coding	KNOWN	NA	NA
chr13	74691618	74691648	14593[gene=ENSMUSG00000021583][PH=4][PH0=0.07][P=7.3e-03]	4	+	2	ENSMUSG00000021583	Erap1	3'UTR	protein_coding	KNOWN	NA	NA
chr13	74691454	74691484	14576[gene=ENSMUSG00000021583][PH=5][PH0=0.07][P=1.4e-04]	5	+	3	ENSMUSG00000021583	Erap1	3'UTR	protein_coding	KNOWN	NA	NA
chr13	69634189	69634219	14060[gene=ENSMUSG00000021595][PH=4][PH0=0.03][P=4.4e-04]	4	+	2	ENSMUSG00000021595	Nsun2	3'UTR	protein_coding	KNOWN	NA	NA
chr13	69634097	69634127	14049[gene=ENSMUSG00000021595][PH=5][PH0=0.03][P=3.4e-06]	5	+	3	ENSMUSG00000021595	Nsun2	3'UTR	protein_coding	KNOWN	NA	NA
chr13	76925580	76925610	14967[gene=ENSMUSG00000021596][PH=2][PH0=0.00][P=6.9e-03]	2	+	1	ENSMUSG00000021596	Mctp1	intron	protein_coding	KNOWN	NA	NA
chr13	77043251	77043281	13565[gene=ENSMUSG00000021597][PH=3][PH0=0.02][P=5.6e-03]	3	-	2	ENSMUSG00000021597	Ankrd32	3'UTR	protein_coding	KNOWN	NA	NA
chr13	77043221	77043251	13561[gene=ENSMUSG00000021597][PH=3][PH0=0.02][P=5.6e-03]	3	-	3	ENSMUSG00000021597	Ankrd32	3'UTR	protein_coding	KNOWN	NA	NA
chr13	73620575	73620605	14265[gene=ENSMUSG00000021610][PH=7][PH0=0.05][P=5.6e-10]	7	+	4	ENSMUSG00000021610	Clptm1l	3'UTR	protein_coding	KNOWN	NA	NA
chr13	91796580	91796610	14724[gene=ENSMUSG00000021621][PH=3][PH0=0.03][P=7.5e-03]	3	-	3	ENSMUSG00000021621	Zcchc9	3'UTR	protein_coding	KNOWN	NA	NA
chr13	100802870	100802900	17749[gene=ENSMUSG00000021629][PH=6][PH0=0.07][P=1.3e-06]	6	-	4	ENSMUSG00000021629	Slc30a5	3'UTR	protein_coding	KNOWN	NA	NA
chr13	100824963	100824993	17826[gene=ENSMUSG00000021629][PH=7][PH0=0.07][P=1.5e-08]	7	-	2	ENSMUSG00000021629	Slc30a5	CDS	protein_coding	KNOWN	NA	NA
chr13	100802786	100802816	17731[gene=ENSMUSG00000021629][PH=18][PH0=0.07][P=1.0e-100]	18	-	5	ENSMUSG00000021629	Slc30a5	3'UTR	protein_coding	KNOWN	NA	NA
chr13	100617170	100617200	17525[gene=ENSMUSG00000021635][PH=12][PH0=0.06][P=1.3e-13]	12	-	4	ENSMUSG00000021635	Rad17	3'UTR	protein_coding	KNOWN	NA	NA
chr13	100617388	100617418	17544[gene=ENSMUSG00000021635][PH=10][PH0=0.06][P=1.3e-13]	10	-	4	ENSMUSG00000021635	Rad17	3'UTR	protein_coding	KNOWN	NA	NA
chr13	100627588	100627618	17578[gene=ENSMUSG00000021635][PH=6][PH0=0.06][P=2.8e-07]	6	-	2	ENSMUSG00000021635	Rad17	CDS	protein_coding	KNOWN	NA	NA
chr13	98273549	98273579	18104[gene=ENSMUSG00000021661][PH=3][PH0=0.02][P=2.6e-03]	3	+	3	ENSMUSG00000021661	Ankra2	3'UTR|intron	protein_coding	KNOWN	NA	NA
chr13	98140438	98140468	16062[gene=ENSMUSG00000021662][PH=2][PH0=0.00][P=1.1e-03]	2	-	2	ENSMUSG00000021662	Arhgef28	intron	protein_coding	KNOWN	NA	NA
chr13	97190595	97190625	16013[gene=ENSMUSG00000021665][PH=527][PH0=1.17][P=9.4e-14]	527	-	5	ENSMUSG00000021665	Hexb	intron	protein_coding	KNOWN	LSU-rRNA_Hsa	NA
chr13	97146237	97146267	17898[gene=ENSMUSG00000021666][PH=3][PH0=0.02][P=6.6e-03]	3	+	3	ENSMUSG00000021666	Gfm2	CDS	protein_coding	KNOWN	NA	NA
chr13	96481982	96482012	15565[gene=ENSMUSG00000021668][PH=3][PH0=0.02][P=5.3e-03]	3	-	3	ENSMUSG00000021668	Polk	3'UTR	protein_coding	KNOWN	NA	NA
chr13	96480789	96480819	15549[gene=ENSMUSG00000021668][PH=6][PH0=0.02][P=5.1e-10]	6	-	3	ENSMUSG00000021668	Polk	3'UTR	protein_coding	KNOWN	NA	NA
chr13	96638511	96638541	17771[gene=ENSMUSG00000021669][PH=4][PH0=0.06][P=7.0e-03]	4	+	3	ENSMUSG00000021669	Col4a3bp	3'UTR	protein_coding	KNOWN	NA	NA
chr13	96639490	96639520	17850[gene=ENSMUSG00000021669][PH=7][PH0=0.06][P=1.5e-08]	7	+	3	ENSMUSG00000021669	Col4a3bp	3'UTR	protein_coding	KNOWN	NA	NA
chr13	96638614	96638644	17794[gene=ENSMUSG00000021669][PH=26][PH0=0.06][P=1.0e-100]	26	+	5	ENSMUSG00000021669	Col4a3bp	3'UTR	protein_coding	KNOWN	NA	NA
chr13	96638711	96638741	17821[gene=ENSMUSG00000021669][PH=7][PH0=0.06][P=1.5e-08]	7	+	3	ENSMUSG00000021669	Col4a3bp	3'UTR	protein_coding	KNOWN	NA	NA
chr13	96638560	96638590	17779[gene=ENSMUSG00000021669][PH=4][PH0=0.06][P=7.0e-03]	4	+	3	ENSMUSG00000021669	Col4a3bp	3'UTR	protein_coding	KNOWN	NA	NA
chr13	96649342	96649372	15683[gene=ENSMUSG00000021670][PH=14][PH0=0.24][P=1.0e-100]	14	-	4	ENSMUSG00000021670	Hmgcr	3'UTR	protein_coding	KNOWN	NA	NA
chr13	96649752	96649782	15756[gene=ENSMUSG00000021670][PH=20][PH0=0.24][P=1.0e-100]	20	-	5	ENSMUSG00000021670	Hmgcr	3'UTR	protein_coding	KNOWN	NA	NA
chr13	96650054	96650084	15789[gene=ENSMUSG00000021670][PH=9][PH0=0.24][P=3.8e-08]	9	-	5	ENSMUSG00000021670	Hmgcr	3'UTR	protein_coding	KNOWN	NA	NA
chr13	96650146	96650176	15824[gene=ENSMUSG00000021670][PH=26][PH0=0.24][P=1.0e-100]	26	-	4	ENSMUSG00000021670	Hmgcr	3'UTR	protein_coding	KNOWN	NA	NA
chr13	96650013	96650043	15781[gene=ENSMUSG00000021670][PH=6][PH0=0.24][P=9.5e-04]	6	-	3	ENSMUSG00000021670	Hmgcr	3'UTR	protein_coding	KNOWN	NA	NA
chr13	96649306	96649336	15671[gene=ENSMUSG00000021670][PH=7][PH0=0.24][P=3.8e-05]	7	-	5	ENSMUSG00000021670	Hmgcr	3'UTR	protein_coding	KNOWN	NA	NA
chr13	96649104	96649134	15640[gene=ENSMUSG00000021670][PH=13][PH0=0.24][P=1.0e-100]	13	-	4	ENSMUSG00000021670	Hmgcr	3'UTR	protein_coding	KNOWN	NA	NA
chr13	96414821	96414851	17547[gene=ENSMUSG00000021671][PH=6][PH0=0.02][P=1.5e-10]	6	+	2	ENSMUSG00000021671	Poc5	3'UTR	protein_coding	KNOWN	NA	NA
chr13	95511842	95511872	15338[gene=ENSMUSG00000021678][PH=3][PH0=0.03][P=6.1e-03]	3	-	2	ENSMUSG00000021678	F2rl1	3'UTR	protein_coding	KNOWN	NA	NA
chr13	95511938	95511968	15348[gene=ENSMUSG00000021678][PH=6][PH0=0.03][P=2.1e-09]	6	-	4	ENSMUSG00000021678	F2rl1	3'UTR	protein_coding	KNOWN	NA	NA
chr13	95351011	95351041	15282[gene=ENSMUSG00000021681][PH=5][PH0=0.03][P=8.1e-07]	5	-	4	ENSMUSG00000021681	Aggf1	3'UTR	protein_coding	KNOWN	NA	NA
chr13	94203372	94203402	15253[gene=ENSMUSG00000021687][PH=4][PH0=0.00][P=1.1e-07]	4	-	2	ENSMUSG00000021687	Scamp1	3'UTR	protein_coding	KNOWN	NA	NA
chr13	106958830	106958860	20045[gene=ENSMUSG00000021692][PH=5][PH0=0.04][P=2.8e-06]	5	+	3	ENSMUSG00000021692	Dimt1	3'UTR	protein_coding	KNOWN	NA	NA
chr13	106982726	106982756	19764[gene=ENSMUSG00000077261][PH=3][PH0=0.03][P=2.3e-03]	3	-	1	ENSMUSG00000021693	Kif2a	intron	protein_coding	KNOWN	NA	NA
chr13	109952404	109952434	20590[gene=ENSMUSG00000021699][PH=3][PH0=0.01][P=4.6e-03]	3	+	2	ENSMUSG00000021699	Pde4d	3'UTR	protein_coding	KNOWN	NA	NA
chr13	109952119	109952149	20579[gene=ENSMUSG00000021699][PH=4][PH0=0.01][P=9.5e-06]	4	+	4	ENSMUSG00000021699	Pde4d	3'UTR	protein_coding	KNOWN	NA	NA
chr13	109924235	109924265	20468[gene=ENSMUSG00000021699][PH=3][PH0=0.01][P=4.6e-03]	3	+	2	ENSMUSG00000021699	Pde4d	intron	protein_coding	KNOWN	NA	NA
chr13	109951994	109952024	20568[gene=ENSMUSG00000021699][PH=7][PH0=0.01][P=1.0e-100]	7	+	4	ENSMUSG00000021699	Pde4d	3'UTR	protein_coding	KNOWN	NA	NA
chr13	92708904	92708934	16706[gene=ENSMUSG00000021703][PH=3][PH0=0.01][P=1.4e-03]	3	+	3	ENSMUSG00000021703	Serinc5	3'UTR	protein_coding	KNOWN	NA	NA
chr13	92639909	92639939	16675[gene=ENSMUSG00000021703][PH=3][PH0=0.01][P=1.4e-03]	3	+	3	ENSMUSG00000021703	Serinc5	intron	protein_coding	KNOWN	NA	NA
chr13	103819793	103819823	18431[gene=ENSMUSG00000021709][PH=30][PH0=0.14][P=3.3e-13]	30	-	4	ENSMUSG00000021709	Erbb2ip	3'UTR	protein_coding	KNOWN	NA	NA
chr13	103820592	103820622	18509[gene=ENSMUSG00000021709][PH=17][PH0=0.14][P=3.3e-13]	17	-	4	ENSMUSG00000021709	Erbb2ip	3'UTR	protein_coding	KNOWN	NA	NA
chr13	103819317	103819347	18367[gene=ENSMUSG00000021709][PH=11][PH0=0.14][P=6.6e-13]	11	-	4	ENSMUSG00000021709	Erbb2ip	3'UTR	protein_coding	KNOWN	NA	NA
chr13	103818949	103818979	18341[gene=ENSMUSG00000021709][PH=6][PH0=0.14][P=1.8e-04]	6	-	2	ENSMUSG00000021709	Erbb2ip	3'UTR	protein_coding	KNOWN	NA	NA
chr13	103834768	103834798	18634[gene=ENSMUSG00000021709][PH=9][PH0=0.14][P=1.6e-09]	9	-	3	ENSMUSG00000021709	Erbb2ip	CDS	protein_coding	KNOWN	NA	NA
chr13	103857032	103857062	18776[gene=ENSMUSG00000021709][PH=6][PH0=0.14][P=1.8e-04]	6	-	3	ENSMUSG00000021709	Erbb2ip	CDS	protein_coding	KNOWN	NA	NA
chr13	103859452	103859482	18810[gene=ENSMUSG00000021709][PH=11][PH0=0.14][P=6.6e-13]	11	-	5	ENSMUSG00000021709	Erbb2ip	CDS	protein_coding	KNOWN	NA	NA
chr13	104143952	104143982	19167[gene=ENSMUSG00000021711][PH=4][PH0=0.02][P=2.1e-05]	4	-	2	ENSMUSG00000021711	Trappc13	3'UTR	protein_coding	KNOWN	NA	NA
chr13	104202859	104202889	18421[gene=ENSMUSG00000021712][PH=4][PH0=0.05][P=7.0e-04]	4	+	3	ENSMUSG00000021712	Trim23	3'UTR	protein_coding	KNOWN	NA	NA
chr13	104202804	104202834	18406[gene=ENSMUSG00000021712][PH=16][PH0=0.05][P=1.0e-100]	16	+	5	ENSMUSG00000021712	Trim23	3'UTR	protein_coding	KNOWN	NA	NA
chr13	104654569	104654599	19278[gene=ENSMUSG00000021715][PH=4][PH0=0.02][P=9.5e-05]	4	-	1	ENSMUSG00000021715	Cwc27	intron	protein_coding	KNOWN	NA	NA
chr13	116855013	116855043	22373[gene=ENSMUSG00000021725][PH=21][PH0=0.10][P=1.0e-100]	21	-	5	ENSMUSG00000021725	Parp8	3'UTR	protein_coding	KNOWN	NA	NA
chr13	117025197	117025227	23227[gene=ENSMUSG00000021725][PH=5][PH0=0.10][P=1.8e-03]	5	-	3	ENSMUSG00000021725	Parp8	CDS	protein_coding	KNOWN	NA	NA
chr13	116894843	116894873	22612[gene=ENSMUSG00000021725][PH=5][PH0=0.10][P=1.8e-03]	5	-	3	ENSMUSG00000021725	Parp8	CDS	protein_coding	KNOWN	NA	NA
chr13	118383015	118383045	23297[gene=ENSMUSG00000021731][PH=5][PH0=0.03][P=7.1e-07]	5	-	4	ENSMUSG00000021731	Mrps30	CDS	protein_coding	KNOWN	NA	NA
chr13	118385253	118385283	23304[gene=ENSMUSG00000021731][PH=3][PH0=0.03][P=7.8e-03]	3	-	2	ENSMUSG00000021731	Mrps30	CDS	protein_coding	KNOWN	NA	NA
chr14	14797109	14797139	906[gene=ENSMUSG00000021733][PH=16][PH0=0.11][P=3.1e-13]	16	+	5	ENSMUSG00000021733	Slc4a7	3'UTR	protein_coding	KNOWN	NA	NA
chr14	14798069	14798099	965[gene=ENSMUSG00000021733][PH=7][PH0=0.11][P=5.8e-07]	7	+	5	ENSMUSG00000021733	Slc4a7	3'UTR	protein_coding	KNOWN	NA	NA
chr14	14799659	14799689	1119[gene=ENSMUSG00000021733][PH=6][PH0=0.11][P=3.2e-05]	6	+	3	ENSMUSG00000021733	Slc4a7	3'UTR	protein_coding	KNOWN	NA	NA
chr14	14798943	14798973	1055[gene=ENSMUSG00000021733][PH=5][PH0=0.11][P=1.5e-03]	5	+	3	ENSMUSG00000021733	Slc4a7	3'UTR	protein_coding	KNOWN	NA	NA
chr14	14798614	14798644	989[gene=ENSMUSG00000021733][PH=21][PH0=0.11][P=3.1e-13]	21	+	5	ENSMUSG00000021733	Slc4a7	3'UTR	protein_coding	KNOWN	NA	NA
chr14	14798675	14798705	1012[gene=ENSMUSG00000021733][PH=8][PH0=0.11][P=9.0e-09]	8	+	4	ENSMUSG00000021733	Slc4a7	3'UTR	protein_coding	KNOWN	NA	NA
chr14	14799309	14799339	1082[gene=ENSMUSG00000021733][PH=5][PH0=0.11][P=1.5e-03]	5	+	3	ENSMUSG00000021733	Slc4a7	3'UTR	protein_coding	KNOWN	NA	NA
chr14	14798759	14798789	1031[gene=ENSMUSG00000021733][PH=10][PH0=0.11][P=1.6e-12]	10	+	3	ENSMUSG00000021733	Slc4a7	3'UTR	protein_coding	KNOWN	NA	NA
chr14	14799335	14799365	1088[gene=ENSMUSG00000021733][PH=17][PH0=0.11][P=3.1e-13]	17	+	4	ENSMUSG00000021733	Slc4a7	3'UTR	protein_coding	KNOWN	NA	NA
chr14	14120159	14120189	332[gene=ENSMUSG00000021737][PH=3][PH0=0.03][P=5.3e-03]	3	-	2	ENSMUSG00000021737	Psmd6	CDS	protein_coding	KNOWN	NA	NA
chr14	14105991	14106021	543[gene=ENSMUSG00000021738][PH=4][PH0=0.05][P=1.8e-03]	4	+	3	ENSMUSG00000021738	Atxn7	3'UTR	protein_coding	KNOWN	NA	NA
chr14	11973062	11973092	251[gene=ENSMUSG00000021745][PH=2][PH0=0.00][P=8.6e-04]	2	+	2	ENSMUSG00000021745	Ptprg	intron	protein_coding	KNOWN	NA	NA
chr14	8166076	8166106	15[gene=ENSMUSG00000021748][PH=4][PH0=0.03][P=5.0e-05]	4	-	3	ENSMUSG00000021748	Pdhb	3'UTR	protein_coding	KNOWN	NA	NA
chr14	8166333	8166363	21[gene=ENSMUSG00000021748][PH=3][PH0=0.03][P=5.2e-03]	3	-	2	ENSMUSG00000021748	Pdhb	3'UTR|CDS	protein_coding	KNOWN	NA	NA
chr13	111746594	111746624	21485[gene=ENSMUSG00000021754][PH=7][PH0=0.10][P=2.4e-07]	7	-	4	ENSMUSG00000021754	Map3k1	3'UTR	protein_coding	KNOWN	NA	NA
chr13	111746773	111746803	21509[gene=ENSMUSG00000021754][PH=7][PH0=0.10][P=2.4e-07]	7	-	4	ENSMUSG00000021754	Map3k1	3'UTR	protein_coding	KNOWN	NA	NA
chr13	111746433	111746463	21457[gene=ENSMUSG00000021754][PH=12][PH0=0.10][P=2.1e-13]	12	-	3	ENSMUSG00000021754	Map3k1	3'UTR	protein_coding	KNOWN	NA	NA
chr13	111749024	111749054	21591[gene=ENSMUSG00000021754][PH=6][PH0=0.10][P=1.5e-05]	6	-	3	ENSMUSG00000021754	Map3k1	CDS|intron	protein_coding	KNOWN	NA	NA
chr13	112490567	112490597	21113[gene=ENSMUSG00000021756][PH=5][PH0=0.18][P=9.3e-03]	5	+	2	ENSMUSG00000021756	Il6st	CDS	protein_coding	KNOWN	NA	NA
chr13	112488528	112488558	21071[gene=ENSMUSG00000021756][PH=27][PH0=0.18][P=1.0e-100]	27	+	4	ENSMUSG00000021756	Il6st	CDS	protein_coding	KNOWN	NA	NA
chr13	112488597	112488627	21095[gene=ENSMUSG00000021756][PH=5][PH0=0.18][P=9.3e-03]	5	+	2	ENSMUSG00000021756	Il6st	CDS	protein_coding	KNOWN	NA	NA
chr13	112505239	112505269	21233[gene=ENSMUSG00000021756][PH=6][PH0=0.18][P=3.4e-04]	6	+	3	ENSMUSG00000021756	Il6st	3'UTR	protein_coding	KNOWN	NA	NA
chr13	112505810	112505840	21250[gene=ENSMUSG00000021756][PH=10][PH0=0.18][P=1.2e-10]	10	+	5	ENSMUSG00000021756	Il6st	3'UTR	protein_coding	KNOWN	NA	NA
chr13	112506766	112506796	21294[gene=ENSMUSG00000021756][PH=5][PH0=0.18][P=9.3e-03]	5	+	4	ENSMUSG00000021756	Il6st	3'UTR	protein_coding	KNOWN	NA	NA
chr13	112506098	112506128	21278[gene=ENSMUSG00000021756][PH=5][PH0=0.18][P=9.3e-03]	5	+	2	ENSMUSG00000021756	Il6st	3'UTR	protein_coding	KNOWN	NA	NA
chr14	21672105	21672135	3865[gene=ENSMUSG00000021767][PH=3][PH0=0.01][P=8.2e-03]	3	+	2	ENSMUSG00000021767	Kat6b	3'UTR	protein_coding	KNOWN	NA	NA
chr14	21545210	21545240	3768[gene=ENSMUSG00000021767][PH=6][PH0=0.01][P=4.3e-10]	6	+	3	ENSMUSG00000021767	Kat6b	intron	protein_coding	KNOWN	NA	NA
chr14	21752730	21752760	3875[gene=ENSMUSG00000084940][PH=3][PH0=0.01][P=3.8e-04]	3	+	2	ENSMUSG00000021770	Samd8	downstream 10K|intron	protein_coding	KNOWN	NA	NA
chr14	21845462	21845492	4024[gene=ENSMUSG00000021771][PH=6][PH0=0.08][P=1.1e-06]	6	+	4	ENSMUSG00000021771	Vdac2	3'UTR	protein_coding	KNOWN	NA	NA
chr14	21845313	21845343	3995[gene=ENSMUSG00000021771][PH=12][PH0=0.08][P=1.0e-100]	12	+	5	ENSMUSG00000021771	Vdac2	3'UTR	protein_coding	KNOWN	NA	NA
chr14	18280384	18280414	1542[gene=ENSMUSG00000021772][PH=3][PH0=0.02][P=2.3e-03]	3	+	3	ENSMUSG00000021772	Nkiras1	3'UTR	protein_coding	KNOWN	NA	NA
chr14	18283178	18283208	502[gene=ENSMUSG00000021774][PH=4][PH0=0.04][P=7.3e-04]	4	-	2	ENSMUSG00000021774	Ube2e1	3'UTR	protein_coding	KNOWN	NA	NA
chr14	34344829	34344859	8082[gene=ENSMUSG00000021794][PH=12][PH0=0.05][P=1.0e-100]	12	+	4	ENSMUSG00000021794	Glud1	3'UTR	protein_coding	KNOWN	NA	NA
chr14	20384863	20384893	822[gene=ENSMUSG00000021811][PH=5][PH0=0.03][P=3.2e-07]	5	-	3	ENSMUSG00000021811	Dnajc9	3'UTR	protein_coding	KNOWN	NA	NA
chr14	20500432	20500462	910[gene=ENSMUSG00000021816][PH=6][PH0=0.12][P=3.2e-05]	6	-	3	ENSMUSG00000021816	Ppp3cb	3'UTR	protein_coding	KNOWN	NA	NA
chr14	20500049	20500079	894[gene=ENSMUSG00000021816][PH=5][PH0=0.12][P=1.3e-03]	5	-	3	ENSMUSG00000021816	Ppp3cb	3'UTR	protein_coding	KNOWN	NA	NA
chr14	20508219	20508249	988[gene=ENSMUSG00000021816][PH=5][PH0=0.12][P=1.3e-03]	5	-	3	ENSMUSG00000021816	Ppp3cb	3'UTR|intron	protein_coding	KNOWN	NA	NA
chr14	20508280	20508310	996[gene=ENSMUSG00000021816][PH=6][PH0=0.12][P=3.2e-05]	6	-	4	ENSMUSG00000021816	Ppp3cb	3'UTR|intron	protein_coding	KNOWN	NA	NA
chr14	20544589	20544619	1197[gene=ENSMUSG00000034235][PH=4][PH0=0.02][P=6.5e-05]	4	-	1	ENSMUSG00000021816	Ppp3cb	downstream 10K|intron	protein_coding	KNOWN	NA	NA
chr14	20508095	20508125	970[gene=ENSMUSG00000021816][PH=11][PH0=0.12][P=1.7e-13]	11	-	4	ENSMUSG00000021816	Ppp3cb	3'UTR|intron	protein_coding	KNOWN	NA	NA
chr14	20723576	20723606	1852[gene=ENSMUSG00000021819][PH=4][PH0=0.03][P=5.1e-05]	4	+	2	ENSMUSG00000021819	Zswim8	3'UTR	protein_coding	KNOWN	NA	NA
chr14	45285821	45285851	4438[gene=ENSMUSG00000021831][PH=9][PH0=0.05][P=1.3e-13]	9	-	4	ENSMUSG00000021831	Ero1l	3'UTR	protein_coding	KNOWN	NA	NA
chr14	45349015	45349045	8693[gene=ENSMUSG00000021832][PH=9][PH0=0.08][P=1.7e-12]	9	+	3	ENSMUSG00000021832	Psmc6	3'UTR	protein_coding	KNOWN	NA	NA
chr14	45348777	45348807	8676[gene=ENSMUSG00000021832][PH=5][PH0=0.08][P=8.2e-05]	5	+	3	ENSMUSG00000021832	Psmc6	3'UTR	protein_coding	KNOWN	NA	NA
chr14	47319981	47320011	9198[gene=ENSMUSG00000021840][PH=4][PH0=0.06][P=2.4e-03]	4	+	3	ENSMUSG00000021840	Mapk1ip1l	3'UTR	protein_coding	KNOWN	NA	NA
chr14	47704762	47704792	9411[gene=ENSMUSG00000021843][PH=5][PH0=0.03][P=3.3e-06]	5	+	2	ENSMUSG00000021843	Ktn1	intron	protein_coding	KNOWN	NA	NA
chr14	25699953	25699983	4447[gene=ENSMUSG00000021868][PH=25][PH0=0.08][P=1.0e-100]	25	+	5	ENSMUSG00000021868	Ppif	3'UTR	protein_coding	KNOWN	NA	NA
chr14	26414319	26414349	1596[gene=ENSMUSG00000021870][PH=7][PH0=0.04][P=1.5e-09]	7	-	3	ENSMUSG00000021870	Slmap	3'UTR	protein_coding	KNOWN	NA	NA
chr14	26414286	26414316	1590[gene=ENSMUSG00000021870][PH=7][PH0=0.04][P=1.5e-09]	7	-	5	ENSMUSG00000021870	Slmap	3'UTR	protein_coding	KNOWN	NA	NA
chr14	26414723	26414753	1626[gene=ENSMUSG00000021870][PH=6][PH0=0.04][P=2.0e-07]	6	-	3	ENSMUSG00000021870	Slmap	3'UTR	protein_coding	KNOWN	NA	NA
chr14	26533598	26533628	1862[gene=ENSMUSG00000021870][PH=4][PH0=0.04][P=2.1e-03]	4	-	2	ENSMUSG00000021870	Slmap	5'UTR	protein_coding	KNOWN	NA	NA
chr14	26656233	26656263	4706[gene=ENSMUSG00000021877][PH=7][PH0=0.15][P=2.1e-06]	7	+	3	ENSMUSG00000021877	Arf4	3'UTR|intron	protein_coding	KNOWN	NA	NA
chr14	26656400	26656430	4747[gene=ENSMUSG00000021877][PH=37][PH0=0.15][P=1.0e-100]	37	+	5	ENSMUSG00000021877	Arf4	3'UTR|intron	protein_coding	KNOWN	NA	NA
chr14	26651597	26651627	4665[gene=ENSMUSG00000021877][PH=7][PH0=0.15][P=2.1e-06]	7	+	2	ENSMUSG00000021877	Arf4	downstream 10K|intron	protein_coding	KNOWN	NA	NA
chr14	26656322	26656352	4721[gene=ENSMUSG00000021877][PH=7][PH0=0.15][P=2.1e-06]	7	+	3	ENSMUSG00000021877	Arf4	3'UTR|intron	protein_coding	KNOWN	NA	NA
chr14	26656715	26656745	4804[gene=ENSMUSG00000021877][PH=7][PH0=0.15][P=2.1e-06]	7	+	5	ENSMUSG00000021877	Arf4	3'UTR|intron	protein_coding	KNOWN	NA	NA
chr12	98276144	98276174	17706[gene=ENSMUSG00000021886][PH=12][PH0=0.10][P=1.0e-100]	12	+	3	ENSMUSG00000021886	Gpr65	3'UTR	protein_coding	KNOWN	NA	NA
chr14	31509370	31509400	7491[gene=ENSMUSG00000021890][PH=33][PH0=0.18][P=1.0e-100]	33	+	5	ENSMUSG00000021890	Eaf1	3'UTR	protein_coding	KNOWN	NA	NA
chr14	31509563	31509593	7528[gene=ENSMUSG00000021890][PH=5][PH0=0.18][P=4.0e-03]	5	+	3	ENSMUSG00000021890	Eaf1	3'UTR	protein_coding	KNOWN	NA	NA
chr14	31509640	31509670	7548[gene=ENSMUSG00000021890][PH=13][PH0=0.18][P=1.0e-100]	13	+	4	ENSMUSG00000021890	Eaf1	3'UTR	protein_coding	KNOWN	NA	NA
chr14	31509141	31509171	7451[gene=ENSMUSG00000021890][PH=6][PH0=0.18][P=1.4e-04]	6	+	3	ENSMUSG00000021890	Eaf1	3'UTR	protein_coding	KNOWN	NA	NA
chr14	31479544	31479574	2713[gene=ENSMUSG00000021891][PH=4][PH0=0.03][P=5.9e-05]	4	-	4	ENSMUSG00000021891	Mettl6	3'UTR	protein_coding	KNOWN	NA	NA
chr14	31373956	31373986	2599[gene=ENSMUSG00000021892][PH=4][PH0=0.03][P=2.1e-04]	4	-	2	ENSMUSG00000021892	Sh3bp5	3'UTR|intron	protein_coding	KNOWN	NA	NA
chr14	31340060	31340090	7312[gene=ENSMUSG00000021893][PH=6][PH0=0.03][P=8.2e-09]	6	+	3	ENSMUSG00000021893	Capn7	CDS	protein_coding	KNOWN	NA	NA
chr14	27402553	27402583	5667[gene=ENSMUSG00000021895][PH=5][PH0=0.12][P=4.0e-03]	5	+	3	ENSMUSG00000021895	Arhgef3	3'UTR	protein_coding	KNOWN	NA	NA
chr14	27342618	27342648	5094[gene=ENSMUSG00000021895][PH=5][PH0=0.12][P=4.0e-03]	5	+	1	ENSMUSG00000021895	Arhgef3	intron	protein_coding	KNOWN	NA	NA
chr14	27402847	27402877	5681[gene=ENSMUSG00000021895][PH=6][PH0=0.12][P=9.7e-05]	6	+	2	ENSMUSG00000021895	Arhgef3	3'UTR	protein_coding	KNOWN	NA	NA
chr14	27403661	27403691	5800[gene=ENSMUSG00000021895][PH=45][PH0=0.12][P=1.0e-100]	45	+	5	ENSMUSG00000021895	Arhgef3	3'UTR	protein_coding	KNOWN	NA	NA
chr14	27403865	27403895	5838[gene=ENSMUSG00000021895][PH=6][PH0=0.12][P=9.7e-05]	6	+	2	ENSMUSG00000021895	Arhgef3	3'UTR	protein_coding	KNOWN	NA	NA
chr14	27403382	27403412	5714[gene=ENSMUSG00000021895][PH=19][PH0=0.12][P=1.0e-100]	19	+	4	ENSMUSG00000021895	Arhgef3	3'UTR	protein_coding	KNOWN	NA	NA
chr14	31255147	31255177	7278[gene=ENSMUSG00000021901][PH=4][PH0=0.04][P=1.4e-04]	4	+	1	ENSMUSG00000021901	Bap1	CDS	protein_coding	KNOWN	NA	NA
chr14	32082928	32082958	3237[gene=ENSMUSG00000021905][PH=3][PH0=0.03][P=6.5e-03]	3	-	1	ENSMUSG00000021905	Dph3	3'UTR|intron	protein_coding	KNOWN	NA	NA
chr12	119264258	119264288	22275[gene=ENSMUSG00000021908][PH=9][PH0=0.03][P=1.0e-100]	9	+	3	ENSMUSG00000021908	Gm6768	3'UTR	protein_coding	KNOWN	NA	NA
chr14	61367128	61367158	8736[gene=ENSMUSG00000021929][PH=4][PH0=0.06][P=3.9e-03]	4	-	3	ENSMUSG00000021929	Kpna3	3'UTR	protein_coding	KNOWN	NA	NA
chr14	61366200	61366230	8697[gene=ENSMUSG00000021929][PH=5][PH0=0.06][P=5.7e-05]	5	-	3	ENSMUSG00000021929	Kpna3	3'UTR	protein_coding	KNOWN	NA	NA
chr14	61534916	61534946	8950[gene=ENSMUSG00000021930][PH=5][PH0=0.02][P=1.1e-07]	5	-	4	ENSMUSG00000021930	Spryd7	3'UTR	protein_coding	KNOWN	NA	NA
chr14	33381827	33381857	3438[gene=ENSMUSG00000021936][PH=5][PH0=0.05][P=2.2e-05]	5	-	2	ENSMUSG00000021936	Mapk8	3'UTR	protein_coding	KNOWN	NA	NA
chr14	33381759	33381789	3429[gene=ENSMUSG00000021936][PH=4][PH0=0.05][P=1.8e-03]	4	-	3	ENSMUSG00000021936	Mapk8	3'UTR	protein_coding	KNOWN	NA	NA
chr14	33381903	33381933	3448[gene=ENSMUSG00000021936][PH=4][PH0=0.05][P=1.8e-03]	4	-	3	ENSMUSG00000021936	Mapk8	3'UTR	protein_coding	KNOWN	NA	NA
chr14	33381995	33382025	3460[gene=ENSMUSG00000021936][PH=8][PH0=0.05][P=1.2e-11]	8	-	4	ENSMUSG00000021936	Mapk8	3'UTR	protein_coding	KNOWN	NA	NA
chr14	33391139	33391169	3494[gene=ENSMUSG00000021936][PH=5][PH0=0.05][P=2.2e-05]	5	-	3	ENSMUSG00000021936	Mapk8	intron	protein_coding	KNOWN	NA	NA
chr14	63143076	63143106	13744[gene=ENSMUSG00000021939][PH=3][PH0=0.02][P=3.0e-03]	3	+	2	ENSMUSG00000021939	Ctsb	3'UTR	protein_coding	KNOWN	NA	NA
chr14	63142955	63142985	13738[gene=ENSMUSG00000021939][PH=3][PH0=0.02][P=3.0e-03]	3	+	2	ENSMUSG00000021939	Ctsb	3'UTR	protein_coding	KNOWN	NA	NA
chr14	56959856	56959886	12819[gene=ENSMUSG00000021945][PH=6][PH0=0.06][P=6.3e-07]	6	+	3	ENSMUSG00000021945	Zmym2	CDS	protein_coding	KNOWN	NA	NA
chr14	56960151	56960181	12837[gene=ENSMUSG00000021945][PH=11][PH0=0.06][P=1.0e-100]	11	+	5	ENSMUSG00000021945	Zmym2	3'UTR	protein_coding	KNOWN	NA	NA
chr14	56956228	56956258	12799[gene=ENSMUSG00000021945][PH=4][PH0=0.06][P=3.8e-03]	4	+	3	ENSMUSG00000021945	Zmym2	CDS	protein_coding	KNOWN	NA	NA
chr14	30570997	30571027	6561[gene=ENSMUSG00000021957][PH=10][PH0=0.05][P=1.1e-13]	10	+	3	ENSMUSG00000021957	Tkt	CDS	protein_coding	KNOWN	NA	NA
chr14	30571160	30571190	6575[gene=ENSMUSG00000021957][PH=4][PH0=0.05][P=1.0e-03]	4	+	1	ENSMUSG00000021957	Tkt	CDS	protein_coding	KNOWN	NA	NA
chr14	57690764	57690794	7966[gene=ENSMUSG00000021959][PH=4][PH0=0.02][P=1.9e-04]	4	-	3	ENSMUSG00000021959	Lats2	3'UTR|intron	protein_coding	KNOWN	NA	NA
chr14	57689663	57689693	7935[gene=ENSMUSG00000021959][PH=9][PH0=0.02][P=3.7e-13]	9	-	4	ENSMUSG00000021959	Lats2	3'UTR|intron	protein_coding	KNOWN	NA	NA
chr14	57826893	57826923	12929[gene=ENSMUSG00000021967][PH=5][PH0=0.02][P=2.6e-08]	5	+	3	ENSMUSG00000021967	Mrp63	3'UTR	protein_coding	KNOWN	NA	NA
chr14	57834248	57834278	8096[gene=ENSMUSG00000021969][PH=4][PH0=0.07][P=5.3e-03]	4	-	3	ENSMUSG00000021969	Zdhhc20	3'UTR	protein_coding	KNOWN	NA	NA
chr14	57832788	57832818	8028[gene=ENSMUSG00000021969][PH=4][PH0=0.07][P=5.3e-03]	4	-	3	ENSMUSG00000021969	Zdhhc20	3'UTR	protein_coding	KNOWN	NA	NA
chr14	57832889	57832919	8042[gene=ENSMUSG00000021969][PH=6][PH0=0.07][P=1.2e-06]	6	-	3	ENSMUSG00000021969	Zdhhc20	3'UTR	protein_coding	KNOWN	NA	NA
chr14	57836084	57836114	8119[gene=ENSMUSG00000021969][PH=4][PH0=0.07][P=5.3e-03]	4	-	1	ENSMUSG00000021969	Zdhhc20	3'UTR	protein_coding	KNOWN	NA	NA
chr14	57833297	57833327	8077[gene=ENSMUSG00000021969][PH=6][PH0=0.07][P=1.2e-06]	6	-	2	ENSMUSG00000021969	Zdhhc20	3'UTR	protein_coding	KNOWN	NA	NA
chr14	57833012	57833042	8056[gene=ENSMUSG00000021969][PH=10][PH0=0.07][P=1.0e-100]	10	-	5	ENSMUSG00000021969	Zdhhc20	3'UTR	protein_coding	KNOWN	NA	NA
chr14	64819325	64819355	9805[gene=ENSMUSG00000021972][PH=4][PH0=0.02][P=1.8e-04]	4	-	1	ENSMUSG00000021972	Hmbox1	downstream 10K|intron	protein_coding	KNOWN	NA	NA
chr14	65054289	65054319	9969[gene=ENSMUSG00000021978][PH=7][PH0=0.03][P=2.1e-11]	7	-	5	ENSMUSG00000021978	Extl3	3'UTR	protein_coding	KNOWN	NA	NA
chr14	65054137	65054167	9954[gene=ENSMUSG00000021978][PH=5][PH0=0.03][P=8.5e-07]	5	-	2	ENSMUSG00000021978	Extl3	3'UTR	protein_coding	KNOWN	NA	NA
chr14	65054092	65054122	9948[gene=ENSMUSG00000021978][PH=4][PH0=0.03][P=1.3e-04]	4	-	2	ENSMUSG00000021978	Extl3	3'UTR	protein_coding	KNOWN	NA	NA
chr14	60300978	60301008	13203[gene=ENSMUSG00000021987][PH=4][PH0=0.04][P=5.9e-04]	4	+	4	ENSMUSG00000021987	Mtmr6	3'UTR	protein_coding	KNOWN	NA	NA
chr14	60277212	60277242	13162[gene=ENSMUSG00000021987][PH=7][PH0=0.04][P=3.6e-10]	7	+	3	ENSMUSG00000021987	Mtmr6	CDS	protein_coding	KNOWN	NA	NA
chr14	60763785	60763815	13378[gene=ENSMUSG00000021990][PH=4][PH0=0.02][P=1.6e-04]	4	+	1	ENSMUSG00000021990	Spata13	3'UTR	protein_coding	KNOWN	NA	NA
chr14	60764520	60764550	13399[gene=ENSMUSG00000021990][PH=8][PH0=0.02][P=4.1e-13]	8	+	3	ENSMUSG00000021990	Spata13	3'UTR	protein_coding	KNOWN	NA	NA
chr14	60763724	60763754	13370[gene=ENSMUSG00000021990][PH=4][PH0=0.02][P=1.6e-04]	4	+	3	ENSMUSG00000021990	Spata13	3'UTR	protein_coding	KNOWN	NA	NA
chr14	29393279	29393309	2194[gene=ENSMUSG00000021991][PH=8][PH0=0.00][P=1.0e-100]	8	-	3	ENSMUSG00000021991	Cacna2d3	intron	protein_coding	KNOWN	NA	NA
chr14	60796196	60796226	13413[gene=ENSMUSG00000021993][PH=5][PH0=0.01][P=7.5e-10]	5	+	4	ENSMUSG00000021993	Mipep	CDS	protein_coding	KNOWN	NA	NA
chr14	75229574	75229604	15428[gene=ENSMUSG00000021998][PH=14][PH0=0.11][P=1.0e-100]	14	+	4	ENSMUSG00000021998	Lcp1	3'UTR	protein_coding	KNOWN	NA	NA
chr14	75229673	75229703	15445[gene=ENSMUSG00000021998][PH=7][PH0=0.11][P=8.1e-07]	7	+	3	ENSMUSG00000021998	Lcp1	3'UTR	protein_coding	KNOWN	NA	NA
chr14	75230769	75230799	15515[gene=ENSMUSG00000021998][PH=49][PH0=0.11][P=1.0e-100]	49	+	5	ENSMUSG00000021998	Lcp1	3'UTR	protein_coding	KNOWN	NA	NA
chr14	75343950	75343980	15633[gene=ENSMUSG00000022000][PH=4][PH0=0.03][P=2.8e-04]	4	+	2	ENSMUSG00000022000	Zc3h13	3'UTR	protein_coding	KNOWN	NA	NA
chr14	75344372	75344402	15650[gene=ENSMUSG00000022000][PH=4][PH0=0.03][P=2.8e-04]	4	+	3	ENSMUSG00000022000	Zc3h13	3'UTR	protein_coding	KNOWN	NA	NA
chr14	78277684	78277714	13865[gene=ENSMUSG00000022015][PH=17][PH0=0.37][P=1.2e-13]	17	-	5	ENSMUSG00000022015	Tnfsf11	3'UTR	protein_coding	KNOWN	NA	NA
chr14	78277499	78277529	13787[gene=ENSMUSG00000022015][PH=32][PH0=0.37][P=1.2e-13]	32	-	5	ENSMUSG00000022015	Tnfsf11	3'UTR	protein_coding	KNOWN	NA	NA
chr14	78277817	78277847	13913[gene=ENSMUSG00000022015][PH=38][PH0=0.37][P=1.2e-13]	38	-	5	ENSMUSG00000022015	Tnfsf11	3'UTR	protein_coding	KNOWN	NA	NA
chr14	78277997	78278027	14006[gene=ENSMUSG00000022015][PH=45][PH0=0.37][P=1.2e-13]	45	-	5	ENSMUSG00000022015	Tnfsf11	3'UTR	protein_coding	KNOWN	NA	NA
chr14	78492685	78492715	14270[gene=ENSMUSG00000022016][PH=6][PH0=0.05][P=2.4e-07]	6	-	3	ENSMUSG00000022016	Akap11	3'UTR	protein_coding	KNOWN	NA	NA
chr14	79288808	79288838	14598[gene=ENSMUSG00000022018][PH=29][PH0=0.15][P=6.7e-14]	29	-	5	ENSMUSG00000022018	Rgcc	3'UTR	protein_coding	KNOWN	NA	NA
chr14	79462012	79462042	14879[gene=ENSMUSG00000022023][PH=5][PH0=0.05][P=9.6e-06]	5	-	3	ENSMUSG00000022023	Wbp4	CDS	protein_coding	KNOWN	NA	NA
chr14	79461612	79461642	14858[gene=ENSMUSG00000022023][PH=14][PH0=0.05][P=1.0e-100]	14	-	4	ENSMUSG00000022023	Wbp4	3'UTR	protein_coding	KNOWN	NA	NA
chr14	65531133	65531163	10036[gene=ENSMUSG00000022031][PH=11][PH0=0.03][P=2.1e-13]	11	-	4	ENSMUSG00000022031	Elp3	3'UTR	protein_coding	KNOWN	NA	NA
chr14	65531064	65531094	10023[gene=ENSMUSG00000022031][PH=4][PH0=0.03][P=2.5e-04]	4	-	2	ENSMUSG00000022031	Elp3	3'UTR	protein_coding	KNOWN	NA	NA
chr14	65866045	65866075	14057[gene=ENSMUSG00000022035][PH=4][PH0=0.02][P=5.6e-05]	4	+	3	ENSMUSG00000022035	Ccdc25	3'UTR	protein_coding	KNOWN	NA	NA
chr14	66803431	66803461	10442[gene=ENSMUSG00000022048][PH=5][PH0=0.03][P=1.5e-06]	5	-	3	ENSMUSG00000022048	Dpysl2	3'UTR	protein_coding	KNOWN	NA	NA
chr14	66802870	66802900	10424[gene=ENSMUSG00000022048][PH=5][PH0=0.03][P=1.5e-06]	5	-	3	ENSMUSG00000022048	Dpysl2	3'UTR	protein_coding	KNOWN	NA	NA
chr14	66802952	66802982	10433[gene=ENSMUSG00000022048][PH=5][PH0=0.03][P=1.5e-06]	5	-	4	ENSMUSG00000022048	Dpysl2	3'UTR	protein_coding	KNOWN	NA	NA
chr14	67040975	67041005	10725[gene=ENSMUSG00000022052][PH=6][PH0=0.14][P=8.8e-05]	6	-	4	ENSMUSG00000022052	Ppp2r2a	intron	protein_coding	KNOWN	NA	NA
chr14	67015934	67015964	10585[gene=ENSMUSG00000022052][PH=7][PH0=0.14][P=2.0e-06]	7	-	3	ENSMUSG00000022052	Ppp2r2a	3'UTR	protein_coding	KNOWN	NA	NA
chr14	67016115	67016145	10604[gene=ENSMUSG00000022052][PH=17][PH0=0.14][P=2.0e-13]	17	-	5	ENSMUSG00000022052	Ppp2r2a	3'UTR	protein_coding	KNOWN	NA	NA
chr14	69805538	69805568	11194[gene=ENSMUSG00000022075][PH=3][PH0=0.01][P=1.3e-03]	3	-	1	ENSMUSG00000022075	Rhobtb2	5'UTR	protein_coding	KNOWN	NA	NA
chr14	96453928	96453958	15155[gene=ENSMUSG00000022076][PH=2][PH0=0.00][P=1.4e-03]	2	-	2	ENSMUSG00000022076	Klhl1	intron	protein_coding	KNOWN	NA	NA
chr14	70217993	70218023	11249[gene=ENSMUSG00000022092][PH=10][PH0=0.02][P=1.0e-100]	10	-	4	ENSMUSG00000022092	Ppp3cc	3'UTR	protein_coding	KNOWN	NA	NA
chr14	70305295	70305325	11360[gene=ENSMUSG00000022094][PH=8][PH0=0.03][P=3.4e-13]	8	-	4	ENSMUSG00000022094	Slc39a14	3'UTR	protein_coding	KNOWN	NA	NA
chr14	73195913	73195943	12158[gene=ENSMUSG00000022105][PH=4][PH0=0.03][P=9.6e-04]	4	-	3	ENSMUSG00000022105	Rb1	3'UTR|intron	protein_coding	KNOWN	NA	NA
chr14	73195948	73195978	12165[gene=ENSMUSG00000022105][PH=9][PH0=0.03][P=4.5e-13]	9	-	3	ENSMUSG00000022105	Rb1	3'UTR|intron	protein_coding	KNOWN	NA	NA
chr14	73196791	73196821	12199[gene=ENSMUSG00000022105][PH=14][PH0=0.03][P=4.5e-13]	14	-	5	ENSMUSG00000022105	Rb1	3'UTR|intron	protein_coding	KNOWN	NA	NA
chr14	73145978	73146008	14834[gene=ENSMUSG00000022106][PH=3][PH0=0.01][P=5.4e-04]	3	+	2	ENSMUSG00000022106	Rcbtb2	intron	protein_coding	KNOWN	NA	NA
chr14	73362887	73362917	12450[gene=ENSMUSG00000022108][PH=6][PH0=0.09][P=3.3e-06]	6	-	3	ENSMUSG00000022108	Itm2b	3'UTR	protein_coding	KNOWN	NA	NA
chr14	101672505	101672535	17360[gene=ENSMUSG00000022111][PH=5][PH0=0.03][P=1.3e-06]	5	+	3	ENSMUSG00000022111	Uchl3	intron	protein_coding	KNOWN	NA	NA
chr14	101696077	101696107	17396[gene=ENSMUSG00000022111][PH=4][PH0=0.03][P=1.7e-04]	4	+	2	ENSMUSG00000022111	Uchl3	3'UTR	protein_coding	KNOWN	NA	NA
chr14	116087197	116087227	18026[gene=ENSMUSG00000022112][PH=6][PH0=0.00][P=1.0e-100]	6	+	2	ENSMUSG00000022112	Gpc5	intron	protein_coding	KNOWN	NA	NA
chr14	105115289	105115319	16728[gene=ENSMUSG00000022119][PH=8][PH0=0.11][P=1.0e-08]	8	-	3	ENSMUSG00000022119	Rbm26	CDS|downstream 10K|intron	protein_coding	KNOWN	NA	NA
chr14	105114649	105114679	16709[gene=ENSMUSG00000022119][PH=7][PH0=0.11][P=6.3e-07]	7	-	4	ENSMUSG00000022119	Rbm26	downstream 10K|intron	protein_coding	KNOWN	NA	NA
chr14	103082043	103082073	15720[gene=ENSMUSG00000022124][PH=18][PH0=0.14][P=1.0e-100]	18	-	4	ENSMUSG00000022124	Fbxl3	3'UTR	protein_coding	KNOWN	NA	NA
chr14	103081680	103081710	15674[gene=ENSMUSG00000022124][PH=5][PH0=0.14][P=1.6e-03]	5	-	3	ENSMUSG00000022124	Fbxl3	3'UTR	protein_coding	KNOWN	NA	NA
chr14	103081993	103082023	15703[gene=ENSMUSG00000022124][PH=5][PH0=0.14][P=1.6e-03]	5	-	3	ENSMUSG00000022124	Fbxl3	3'UTR	protein_coding	KNOWN	NA	NA
chr14	103081699	103081729	15677[gene=ENSMUSG00000022124][PH=6][PH0=0.14][P=4.7e-05]	6	-	2	ENSMUSG00000022124	Fbxl3	3'UTR	protein_coding	KNOWN	NA	NA
chr14	118112508	118112538	17219[gene=ENSMUSG00000022130][PH=7][PH0=0.02][P=8.2e-13]	7	-	3	ENSMUSG00000022130	Tgds	3'UTR	protein_coding	KNOWN	NA	NA
chr14	118874415	118874445	18082[gene=ENSMUSG00000022132][PH=2][PH0=0.00][P=3.5e-03]	2	+	1	ENSMUSG00000022132	Cldn10	3'UTR	protein_coding	KNOWN	NA	NA
chr14	118978225	118978255	18159[gene=ENSMUSG00000022136][PH=6][PH0=0.05][P=1.1e-07]	6	+	3	ENSMUSG00000022136	Dnajc3	3'UTR	protein_coding	KNOWN	NA	NA
[truncated: 7,501 more rows]

## Sheet: B. CLIP, 4h, KO biological reps
pan-ZFP36 HITS-CLIP peaks in ZFP36 KO CD4+ T-cells
column	description
chr	chromosome
start	chromosome start coordinate
end	chromsome end coordinate
peak.ID	unique peak ID
PH	peak height; the peak amplitude at its heighest point
strand	chromosome strand
BC	biological complexity; the number of independent biological samples (mice or mice pools) supporting the peak (out of 3 total)
gene	ensembl ID gene annotation for peak site
Gene_name	entrez ID gene annotation for peak site
annotation	gene region annotation for peak site; multiple annotations separated by "I"
Gene_type	gene type in ensembl database
Gene_status	gene status in ensembl database
rRNA	overlapping rRNA genes
tRNA	overlapping tRNA gene
chr	start	end	peak.ID	PH	strand	BC	gene	Gene_name	annotation	Gene_type	Gene_status	rRNA	tRNA
chr3	108107873	108107903	8707[gene=ENSMUSG00000000001][PH=7][PH0=0.05][P=1.1e-09]	7	-	3	ENSMUSG00000000001	Gnai3	3'UTR	protein_coding	KNOWN	NA	NA
chr3	108107629	108107659	8696[gene=ENSMUSG00000000001][PH=4][PH0=0.05][P=1.2e-03]	4	-	2	ENSMUSG00000000001	Gnai3	3'UTR	protein_coding	KNOWN	NA	NA
chr16	18780494	18780524	2304[gene=ENSMUSG00000000028][PH=2][PH0=0.00][P=3.6e-03]	2	-	1	ENSMUSG00000000028	Cdc45	3'UTR	protein_coding	KNOWN	NA	NA
chr13	5869215	5869245	159[gene=ENSMUSG00000000078][PH=14][PH0=0.17][P=1.0e-100]	14	+	3	ENSMUSG00000000078	Klf6	3'UTR	protein_coding	KNOWN	NA	NA
chr13	5870355	5870385	213[gene=ENSMUSG00000000078][PH=6][PH0=0.17][P=9.2e-05]	6	+	3	ENSMUSG00000000078	Klf6	3'UTR	protein_coding	KNOWN	NA	NA
chr13	5869350	5869380	184[gene=ENSMUSG00000000078][PH=9][PH0=0.17][P=1.4e-09]	9	+	3	ENSMUSG00000000078	Klf6	3'UTR	protein_coding	KNOWN	NA	NA
chr13	5868960	5868990	139[gene=ENSMUSG00000000078][PH=7][PH0=0.17][P=2.7e-06]	7	+	2	ENSMUSG00000000078	Klf6	3'UTR	protein_coding	KNOWN	NA	NA
chr4	120529749	120529779	14578[gene=ENSMUSG00000000085][PH=3][PH0=0.01][P=5.2e-04]	3	+	2	ENSMUSG00000000085	Scmh1	3'UTR|CDS	protein_coding	KNOWN	NA	NA
chrX	7774956	7774986	92[gene=ENSMUSG00000000134][PH=5][PH0=0.01][P=1.7e-08]	5	+	3	ENSMUSG00000000134	Tfe3	3'UTR	protein_coding	KNOWN	NA	NA
chr11	108949837	108949867	21670[gene=ENSMUSG00000000142][PH=3][PH0=0.02][P=3.8e-03]	3	+	3	ENSMUSG00000000142	Axin2	3'UTR	protein_coding	KNOWN	NA	NA
chr11	108949629	108949659	21652[gene=ENSMUSG00000000142][PH=5][PH0=0.02][P=1.2e-07]	5	+	3	ENSMUSG00000000142	Axin2	3'UTR	protein_coding	KNOWN	NA	NA
chr9	50636213	50636243	4923[gene=ENSMUSG00000000168][PH=6][PH0=0.05][P=1.1e-07]	6	-	2	ENSMUSG00000000168	Dlat	3'UTR	protein_coding	KNOWN	NA	NA
chr9	50635828	50635858	4904[gene=ENSMUSG00000000168][PH=6][PH0=0.05][P=1.1e-07]	6	-	3	ENSMUSG00000000168	Dlat	3'UTR	protein_coding	KNOWN	NA	NA
chr9	50636257	50636287	4931[gene=ENSMUSG00000000168][PH=4][PH0=0.05][P=9.0e-04]	4	-	3	ENSMUSG00000000168	Dlat	3'UTR	protein_coding	KNOWN	NA	NA
chr9	50636281	50636311	4934[gene=ENSMUSG00000000168][PH=4][PH0=0.05][P=9.0e-04]	4	-	3	ENSMUSG00000000168	Dlat	3'UTR	protein_coding	KNOWN	NA	NA
chr9	50636355	50636385	4944[gene=ENSMUSG00000000168][PH=6][PH0=0.05][P=1.1e-07]	6	-	3	ENSMUSG00000000168	Dlat	3'UTR	protein_coding	KNOWN	NA	NA
chr6	127150783	127150813	15329[gene=ENSMUSG00000000184][PH=14][PH0=0.94][P=2.2e-08]	14	-	3	ENSMUSG00000000184	Ccnd2	5'UTR	protein_coding	KNOWN	NA	NA
chr6	127128737	127128767	14927[gene=ENSMUSG00000000184][PH=33][PH0=0.94][P=1.0e-100]	33	-	3	ENSMUSG00000000184	Ccnd2	3'UTR	protein_coding	KNOWN	NA	NA
chr6	127129547	127129577	15054[gene=ENSMUSG00000000184][PH=17][PH0=0.94][P=5.4e-12]	17	-	3	ENSMUSG00000000184	Ccnd2	3'UTR	protein_coding	KNOWN	NA	NA
chr6	127130041	127130071	15158[gene=ENSMUSG00000000184][PH=168][PH0=0.94][P=1.0e-100]	168	-	3	ENSMUSG00000000184	Ccnd2	3'UTR	protein_coding	KNOWN	NA	NA
chr6	127129907	127129937	15088[gene=ENSMUSG00000000184][PH=11][PH0=0.94][P=4.5e-05]	11	-	3	ENSMUSG00000000184	Ccnd2	3'UTR	protein_coding	KNOWN	NA	NA
chr6	127130138	127130168	15206[gene=ENSMUSG00000000184][PH=32][PH0=0.94][P=1.0e-100]	32	-	3	ENSMUSG00000000184	Ccnd2	3'UTR	protein_coding	KNOWN	NA	NA
chr6	127128595	127128625	14874[gene=ENSMUSG00000000184][PH=127][PH0=0.94][P=1.0e-100]	127	-	3	ENSMUSG00000000184	Ccnd2	3'UTR	protein_coding	KNOWN	NA	NA
chr6	127126055	127126085	14605[gene=ENSMUSG00000000184][PH=15][PH0=0.94][P=1.5e-09]	15	-	3	ENSMUSG00000000184	Ccnd2	3'UTR	protein_coding	KNOWN	NA	NA
chr6	127127491	127127521	14700[gene=ENSMUSG00000000184][PH=10][PH0=0.94][P=4.8e-04]	10	-	3	ENSMUSG00000000184	Ccnd2	3'UTR	protein_coding	KNOWN	NA	NA
chr6	127128789	127128819	14950[gene=ENSMUSG00000000184][PH=15][PH0=0.94][P=1.5e-09]	15	-	3	ENSMUSG00000000184	Ccnd2	3'UTR	protein_coding	KNOWN	NA	NA
chr11	89019236	89019266	17720[gene=ENSMUSG00000000275][PH=7][PH0=0.04][P=8.7e-11]	7	+	3	ENSMUSG00000000275	Trim25	3'UTR	protein_coding	KNOWN	NA	NA
chr11	74844643	74844673	13233[gene=ENSMUSG00000000282][PH=8][PH0=0.05][P=8.7e-12]	8	+	3	ENSMUSG00000000282	Mnt	3'UTR	protein_coding	KNOWN	NA	NA
chr11	74844333	74844363	13214[gene=ENSMUSG00000000282][PH=6][PH0=0.05][P=1.3e-07]	6	+	3	ENSMUSG00000000282	Mnt	3'UTR	protein_coding	KNOWN	NA	NA
chr10	77565573	77565603	9294[gene=ENSMUSG00000000290][PH=22][PH0=0.05][P=1.0e-100]	22	+	3	ENSMUSG00000000290	Itgb2	3'UTR	protein_coding	KNOWN	NA	NA
chr2	179587670	179587700	23988[gene=ENSMUSG00000000305][PH=2][PH0=0.00][P=3.2e-04]	2	+	2	ENSMUSG00000000305	Cdh4	intron	protein_coding	KNOWN	NA	NA
chr3	116548653	116548683	14663[gene=ENSMUSG00000000340][PH=3][PH0=0.02][P=3.2e-03]	3	+	2	ENSMUSG00000000340	Dbt	3'UTR	protein_coding	KNOWN	NA	NA
chr3	116548589	116548619	14653[gene=ENSMUSG00000000340][PH=7][PH0=0.02][P=8.4e-13]	7	+	2	ENSMUSG00000000340	Dbt	3'UTR	protein_coding	KNOWN	NA	NA
chr15	100620560	100620590	10159[gene=ENSMUSG00000000346][PH=4][PH0=0.08][P=2.3e-03]	4	+	2	ENSMUSG00000000346	Dazap2	3'UTR	protein_coding	KNOWN	NA	NA
chr15	100620090	100620120	10138[gene=ENSMUSG00000000346][PH=6][PH0=0.08][P=7.3e-07]	6	+	3	ENSMUSG00000000346	Dazap2	3'UTR	protein_coding	KNOWN	NA	NA
chr10	78186828	78186858	9097[gene=ENSMUSG00000000374][PH=7][PH0=0.03][P=7.0e-11]	7	-	3	ENSMUSG00000000374	Trappc10	3'UTR	protein_coding	KNOWN	NA	NA
chr10	78187127	78187157	9123[gene=ENSMUSG00000000374][PH=12][PH0=0.03][P=2.0e-13]	12	-	3	ENSMUSG00000000374	Trappc10	3'UTR	protein_coding	KNOWN	NA	NA
chr18	24285267	24285297	2590[gene=ENSMUSG00000000420][PH=4][PH0=0.03][P=1.8e-04]	4	+	3	ENSMUSG00000000420	Galnt1	3'UTR	protein_coding	KNOWN	NA	NA
chr18	24238322	24238352	2531[gene=ENSMUSG00000000420][PH=14][PH0=0.03][P=1.0e-100]	14	+	3	ENSMUSG00000000420	Galnt1	5'UTR	protein_coding	KNOWN	NA	NA
chr6	115618614	115618644	10651[gene=ENSMUSG00000000439][PH=3][PH0=0.01][P=2.1e-04]	3	+	3	ENSMUSG00000000439	Mkrn2	3'UTR	protein_coding	KNOWN	NA	NA
chr6	115618626	115618656	12259[gene=ENSMUSG00000000441][PH=4][PH0=0.03][P=1.5e-04]	4	-	3	ENSMUSG00000000441	Raf1	3'UTR	protein_coding	KNOWN	NA	NA
chr15	79995891	79995921	9801[gene=ENSMUSG00000000489][PH=25][PH0=0.05][P=8.6e-14]	25	-	3	ENSMUSG00000000489	Pdgfb	3'UTR	protein_coding	KNOWN	NA	NA
chr15	79997215	79997245	9824[gene=ENSMUSG00000000489][PH=4][PH0=0.05][P=5.6e-04]	4	-	2	ENSMUSG00000000489	Pdgfb	3'UTR	protein_coding	KNOWN	NA	NA
chr15	101232053	101232083	10246[gene=ENSMUSG00000000531][PH=27][PH0=0.08][P=5.6e-14]	27	+	3	ENSMUSG00000000531	Grasp	3'UTR	protein_coding	KNOWN	NA	NA
chr15	101212317	101212347	10210[gene=ENSMUSG00000000532][PH=3][PH0=0.02][P=2.5e-03]	3	+	1	ENSMUSG00000000532	Acvr1b	3'UTR	protein_coding	KNOWN	NA	NA
chr3	105942728	105942758	7585[gene=ENSMUSG00000000563][PH=3][PH0=0.03][P=8.1e-03]	3	-	2	ENSMUSG00000000563	Atp5f1	3'UTR	protein_coding	KNOWN	NA	NA
chr3	105942800	105942830	7591[gene=ENSMUSG00000000563][PH=4][PH0=0.03][P=7.8e-05]	4	-	3	ENSMUSG00000000563	Atp5f1	3'UTR	protein_coding	KNOWN	NA	NA
chr5	99966120	99966150	7823[gene=ENSMUSG00000000568][PH=5][PH0=0.13][P=1.0e-03]	5	-	2	ENSMUSG00000000568	Hnrnpd	3'UTR|CDS	protein_coding	KNOWN	NA	NA
chr5	99961223	99961253	7776[gene=ENSMUSG00000000568][PH=7][PH0=0.13][P=5.8e-07]	7	-	3	ENSMUSG00000000568	Hnrnpd	3'UTR	protein_coding	KNOWN	NA	NA
chr5	99962513	99962543	7792[gene=ENSMUSG00000000568][PH=10][PH0=0.13][P=2.5e-12]	10	-	3	ENSMUSG00000000568	Hnrnpd	3'UTR|CDS	protein_coding	KNOWN	NA	NA
chr5	99967221	99967251	7836[gene=ENSMUSG00000000568][PH=5][PH0=0.13][P=1.0e-03]	5	-	2	ENSMUSG00000000568	Hnrnpd	CDS|intron	protein_coding	KNOWN	NA	NA
chr5	99961060	99961090	7755[gene=ENSMUSG00000000568][PH=10][PH0=0.13][P=2.5e-12]	10	-	3	ENSMUSG00000000568	Hnrnpd	3'UTR	protein_coding	KNOWN	NA	NA
chr5	3841219	3841249	312[gene=ENSMUSG00000000600][PH=5][PH0=0.03][P=2.5e-06]	5	+	2	ENSMUSG00000000600	Krit1	3'UTR	protein_coding	KNOWN	NA	NA
chr6	82725024	82725054	6826[gene=ENSMUSG00000000628][PH=3][PH0=0.02][P=8.1e-03]	3	-	3	ENSMUSG00000000628	Hk2	3'UTR	protein_coding	KNOWN	NA	NA
chr6	82726612	82726642	6859[gene=ENSMUSG00000000628][PH=3][PH0=0.02][P=8.1e-03]	3	-	2	ENSMUSG00000000628	Hk2	3'UTR	protein_coding	KNOWN	NA	NA
chr6	82725888	82725918	6838[gene=ENSMUSG00000000628][PH=9][PH0=0.02][P=1.0e-100]	9	-	3	ENSMUSG00000000628	Hk2	3'UTR|intron	protein_coding	KNOWN	NA	NA
chr8	123105201	123105231	14334[gene=ENSMUSG00000098550][PH=3][PH0=0.02][P=8.3e-04]	3	+	3	ENSMUSG00000000740	Rpl13	3'UTR|intron	protein_coding	KNOWN	NA	NA
chr8	123103071	123103101	14313[gene=ENSMUSG00000092329][PH=349][PH0=0.01][P=1.0e-100]	349	+	3	ENSMUSG00000000740	Rpl13	downstream 10K|intron	protein_coding	KNOWN	NA	NA
chr11	75312714	75312744	12595[gene=ENSMUSG00000000751][PH=3][PH0=0.02][P=2.9e-03]	3	-	1	ENSMUSG00000000751	Rpa1	CDS	protein_coding	KNOWN	NA	NA
chr14	70439188	70439218	6754[gene=ENSMUSG00000000776][PH=36][PH0=0.14][P=1.0e-100]	36	-	3	ENSMUSG00000000776	Polr3d	3'UTR	protein_coding	KNOWN	NA	NA
chr11	52252618	52252648	8350[gene=ENSMUSG00000097219][PH=6][PH0=0.03][P=2.5e-08]	6	-	2	ENSMUSG00000000782	Tcf7	3'UTR|intron	protein_coding	KNOWN	NA	NA
chrX	13293382	13293412	598[gene=ENSMUSG00000000787][PH=7][PH0=0.11][P=1.3e-07]	7	+	3	ENSMUSG00000000787	Ddx3x	3'UTR	protein_coding	KNOWN	NA	NA
chr11	84985159	84985189	14936[gene=ENSMUSG00000000804][PH=3][PH0=0.01][P=4.3e-03]	3	-	2	ENSMUSG00000000804	Usp32	3'UTR	protein_coding	KNOWN	NA	NA
chr11	85055813	85055843	14980[gene=ENSMUSG00000000804][PH=4][PH0=0.01][P=1.8e-05]	4	-	1	ENSMUSG00000000804	Usp32	CDS	protein_coding	KNOWN	NA	NA
chr11	85055840	85055870	14983[gene=ENSMUSG00000000804][PH=3][PH0=0.01][P=4.3e-03]	3	-	2	ENSMUSG00000000804	Usp32	CDS	protein_coding	KNOWN	NA	NA
chr1	161780738	161780768	21050[gene=ENSMUSG00000000817][PH=3][PH0=0.03][P=7.0e-03]	3	-	1	ENSMUSG00000000817	Fasl	3'UTR	protein_coding	KNOWN	NA	NA
chr2	181549634	181549664	24367[gene=ENSMUSG00000000826][PH=5][PH0=0.06][P=3.3e-05]	5	+	3	ENSMUSG00000000826	Dnajc5	3'UTR	protein_coding	KNOWN	NA	NA
chr2	181549650	181549680	24370[gene=ENSMUSG00000000826][PH=4][PH0=0.06][P=2.3e-03]	4	+	3	ENSMUSG00000000826	Dnajc5	3'UTR	protein_coding	KNOWN	NA	NA
chr2	181515865	181515895	24268[gene=ENSMUSG00000000827][PH=7][PH0=0.04][P=3.2e-10]	7	+	3	ENSMUSG00000000827	Tpd52l2	3'UTR	protein_coding	KNOWN	NA	NA
chr11	53612478	53612508	8776[gene=ENSMUSG00000000869][PH=9][PH0=0.02][P=1.0e-100]	9	-	3	ENSMUSG00000000869	Il4	3'UTR|intron	protein_coding	KNOWN	NA	NA
chr14	54368586	54368616	7277[gene=ENSMUSG00000000959][PH=3][PH0=0.02][P=2.5e-03]	3	+	1	ENSMUSG00000000959	Oxa1l	3'UTR	protein_coding	KNOWN	NA	NA
chr11	83648063	83648093	14569[gene=ENSMUSG00000000982][PH=5][PH0=0.10][P=1.1e-04]	5	-	3	ENSMUSG00000000982	Ccl3	3'UTR	protein_coding	KNOWN	NA	NA
chr11	83647996	83648026	14552[gene=ENSMUSG00000000982][PH=21][PH0=0.10][P=1.0e-100]	21	-	3	ENSMUSG00000000982	Ccl3	3'UTR	protein_coding	KNOWN	NA	NA
chr3	90487923	90487953	10926[gene=ENSMUSG00000001016][PH=12][PH0=0.05][P=1.0e-100]	12	+	3	ENSMUSG00000001016	Ilf2	3'UTR	protein_coding	KNOWN	NA	NA
chr3	90506977	90507007	5067[gene=ENSMUSG00000001017][PH=4][PH0=0.06][P=1.1e-03]	4	-	2	ENSMUSG00000001017	Chtop	5'UTR|downstream 10K|intron	protein_coding	KNOWN	NA	NA
chr3	90506872	90506902	5056[gene=ENSMUSG00000001017][PH=4][PH0=0.06][P=1.1e-03]	4	-	3	ENSMUSG00000001017	Chtop	5'UTR|downstream 10K|intron	protein_coding	KNOWN	NA	NA
chr3	90488796	90488826	5020[gene=ENSMUSG00000001018][PH=3][PH0=0.03][P=6.7e-03]	3	-	2	ENSMUSG00000001018	Snapin	3'UTR	protein_coding	KNOWN	NA	NA
chr3	90488385	90488415	5008[gene=ENSMUSG00000001018][PH=3][PH0=0.03][P=6.7e-03]	3	-	2	ENSMUSG00000001018	Snapin	3'UTR	protein_coding	KNOWN	NA	NA
chr3	129983192	129983222	10486[gene=ENSMUSG00000001052][PH=4][PH0=0.02][P=1.2e-04]	4	-	3	ENSMUSG00000001052	Sec24b	3'UTR	protein_coding	KNOWN	NA	NA
chr5	114365300	114365330	9852[gene=ENSMUSG00000001098][PH=16][PH0=0.04][P=1.0e-100]	16	-	3	ENSMUSG00000001098	Kctd10	3'UTR	protein_coding	KNOWN	NA	NA
chrX	20852148	20852178	1034[gene=ENSMUSG00000001127][PH=3][PH0=0.01][P=7.5e-04]	3	+	1	ENSMUSG00000001127	Araf	3'UTR|intron	protein_coding	KNOWN	NA	NA
chr10	76470029	76470059	9110[gene=ENSMUSG00000009114][PH=6][PH0=0.02][P=1.1e-10]	6	+	2	ENSMUSG00000001150	Mcm3ap	5'UTR|downstream 10K	protein_coding	KNOWN	NA	NA
chr6	86649821	86649851	8003[gene=ENSMUSG00000001156][PH=11][PH0=0.05][P=1.0e-100]	11	-	3	ENSMUSG00000001156	Mxd1	3'UTR	protein_coding	KNOWN	NA	NA
chr6	86649882	86649912	8019[gene=ENSMUSG00000001156][PH=7][PH0=0.05][P=1.4e-09]	7	-	3	ENSMUSG00000001156	Mxd1	3'UTR	protein_coding	KNOWN	NA	NA
chr6	86649978	86650008	8032[gene=ENSMUSG00000001156][PH=7][PH0=0.05][P=1.4e-09]	7	-	3	ENSMUSG00000001156	Mxd1	3'UTR	protein_coding	KNOWN	NA	NA
chr6	86648558	86648588	7982[gene=ENSMUSG00000001156][PH=4][PH0=0.05][P=1.1e-03]	4	-	3	ENSMUSG00000001156	Mxd1	3'UTR	protein_coding	KNOWN	NA	NA
chr6	86675359	86675389	8066[gene=ENSMUSG00000001158][PH=5][PH0=0.03][P=7.8e-07]	5	-	3	ENSMUSG00000001158	Snrnp27	3'UTR	protein_coding	KNOWN	NA	NA
chr6	86675263	86675293	8059[gene=ENSMUSG00000001158][PH=3][PH0=0.03][P=8.6e-03]	3	-	2	ENSMUSG00000001158	Snrnp27	3'UTR	protein_coding	KNOWN	NA	NA
chr12	100209770	100209800	10363[gene=ENSMUSG00000001175][PH=10][PH0=0.11][P=3.0e-13]	10	+	3	ENSMUSG00000001175	Calm1	3'UTR	protein_coding	KNOWN	NA	NA
chr10	78271546	78271576	9184[gene=ENSMUSG00000001211][PH=3][PH0=0.01][P=7.2e-04]	3	-	3	ENSMUSG00000001211	Agpat3	3'UTR	protein_coding	KNOWN	NA	NA
chr17	56187045	56187075	10014[gene=ENSMUSG00000001229][PH=5][PH0=0.01][P=1.3e-08]	5	-	3	ENSMUSG00000001229	Dpp9	3'UTR	protein_coding	KNOWN	NA	NA
chr7	31130213	31130243	2497[gene=ENSMUSG00000001248][PH=4][PH0=0.09][P=8.5e-03]	4	-	2	ENSMUSG00000001248	Gramd1a	3'UTR	protein_coding	KNOWN	NA	NA
chr7	31130131	31130161	2479[gene=ENSMUSG00000001248][PH=26][PH0=0.09][P=9.2e-14]	26	-	3	ENSMUSG00000001248	Gramd1a	3'UTR	protein_coding	KNOWN	NA	NA
chr15	102434116	102434146	11118[gene=ENSMUSG00000001280][PH=5][PH0=0.10][P=4.9e-04]	5	+	2	ENSMUSG00000001280	Sp1	3'UTR	protein_coding	KNOWN	NA	NA
chr15	102431862	102431892	11029[gene=ENSMUSG00000001280][PH=10][PH0=0.10][P=4.8e-13]	10	+	3	ENSMUSG00000001280	Sp1	3'UTR	protein_coding	KNOWN	NA	NA
chr15	102434743	102434773	11139[gene=ENSMUSG00000001280][PH=5][PH0=0.10][P=4.9e-04]	5	+	2	ENSMUSG00000001280	Sp1	3'UTR	protein_coding	KNOWN	NA	NA
chr15	102432779	102432809	11054[gene=ENSMUSG00000001280][PH=21][PH0=0.10][P=1.2e-13]	21	+	3	ENSMUSG00000001280	Sp1	3'UTR	protein_coding	KNOWN	NA	NA
chr15	102432864	102432894	11081[gene=ENSMUSG00000001280][PH=8][PH0=0.10][P=2.7e-09]	8	+	3	ENSMUSG00000001280	Sp1	3'UTR	protein_coding	KNOWN	NA	NA
chr15	102235162	102235192	13561[gene=ENSMUSG00000001288][PH=5][PH0=0.01][P=2.6e-08]	5	-	3	ENSMUSG00000001288	Rarg	3'UTR	protein_coding	KNOWN	NA	NA
chr15	102331465	102331495	10962[gene=ENSMUSG00000058290][PH=11][PH0=0.01][P=1.0e-100]	11	+	3	ENSMUSG00000001289	Pfdn5	3'UTR	protein_coding	KNOWN	NA	NA
chr1	186721151	186721181	26327[gene=ENSMUSG00000001305][PH=3][PH0=0.03][P=8.8e-03]	3	-	2	ENSMUSG00000001305	Rrp15	3'UTR	protein_coding	KNOWN	NA	NA
chr1	186721183	186721213	26329[gene=ENSMUSG00000001305][PH=3][PH0=0.03][P=8.8e-03]	3	-	2	ENSMUSG00000001305	Rrp15	3'UTR	protein_coding	KNOWN	NA	NA
chr9	22099699	22099729	3854[gene=ENSMUSG00000001349][PH=3][PH0=0.01][P=4.5e-05]	3	+	2	ENSMUSG00000001349	Cnn1	intron	protein_coding	KNOWN	NA	NA
chr9	78081890	78081920	10124[gene=ENSMUSG00000001366][PH=17][PH0=0.03][P=1.0e-100]	17	-	3	ENSMUSG00000001366	Fbxo9	3'UTR	protein_coding	KNOWN	NA	NA
chr9	78081770	78081800	10103[gene=ENSMUSG00000001366][PH=5][PH0=0.03][P=1.3e-06]	5	-	2	ENSMUSG00000001366	Fbxo9	3'UTR	protein_coding	KNOWN	NA	NA
chr18	36766689	36766719	2918[gene=ENSMUSG00000001380][PH=15][PH0=0.03][P=8.0e-14]	15	-	3	ENSMUSG00000001380	Hars	3'UTR	protein_coding	KNOWN	NA	NA
chr3	88168819	88168849	9580[gene=ENSMUSG00000001419][PH=44][PH0=0.15][P=2.4e-13]	44	+	3	ENSMUSG00000001419	Mef2d	3'UTR	protein_coding	KNOWN	NA	NA
chr3	88168919	88168949	9609[gene=ENSMUSG00000001419][PH=7][PH0=0.15][P=2.0e-06]	7	+	3	ENSMUSG00000001419	Mef2d	3'UTR	protein_coding	KNOWN	NA	NA
chr3	88171570	88171600	9660[gene=ENSMUSG00000001419][PH=20][PH0=0.15][P=2.4e-13]	20	+	3	ENSMUSG00000001419	Mef2d	3'UTR	protein_coding	KNOWN	NA	NA
chr3	88169801	88169831	9626[gene=ENSMUSG00000001419][PH=8][PH0=0.15][P=4.3e-08]	8	+	3	ENSMUSG00000001419	Mef2d	3'UTR	protein_coding	KNOWN	NA	NA
chr3	88169904	88169934	9640[gene=ENSMUSG00000001419][PH=6][PH0=0.15][P=8.1e-05]	6	+	3	ENSMUSG00000001419	Mef2d	3'UTR	protein_coding	KNOWN	NA	NA
chr6	28888582	28888612	2128[gene=ENSMUSG00000001424][PH=4][PH0=0.02][P=5.9e-04]	4	+	3	ENSMUSG00000001424	Snd1	3'UTR|intron	protein_coding	KNOWN	NA	NA
chr6	28888783	28888813	2136[gene=ENSMUSG00000001424][PH=4][PH0=0.02][P=5.9e-04]	4	+	2	ENSMUSG00000001424	Snd1	3'UTR|intron	protein_coding	KNOWN	NA	NA
chr11	97164756	97164786	17766[gene=ENSMUSG00000001440][PH=4][PH0=0.06][P=1.7e-03]	4	-	2	ENSMUSG00000001440	Kpnb1	CDS	protein_coding	KNOWN	NA	NA
chr11	97163947	97163977	17758[gene=ENSMUSG00000001440][PH=4][PH0=0.06][P=1.7e-03]	4	-	3	ENSMUSG00000001440	Kpnb1	CDS	protein_coding	KNOWN	NA	NA
chr11	97161925	97161955	17739[gene=ENSMUSG00000001440][PH=4][PH0=0.06][P=1.7e-03]	4	-	3	ENSMUSG00000001440	Kpnb1	3'UTR	protein_coding	KNOWN	NA	NA
chr11	97049004	97049034	19470[gene=ENSMUSG00000001445][PH=4][PH0=0.02][P=1.5e-05]	4	+	2	ENSMUSG00000001445	Mrpl10	3'UTR	protein_coding	KNOWN	NA	NA
chr5	4092414	4092444	338[gene=ENSMUSG00000001467][PH=4][PH0=0.03][P=1.7e-04]	4	-	2	ENSMUSG00000001467	Cyp51	CDS	protein_coding	KNOWN	NA	NA
chr6	128321180	128321210	15373[gene=ENSMUSG00000001521][PH=5][PH0=0.01][P=1.2e-09]	5	-	3	ENSMUSG00000001521	Tulp3	3'UTR	protein_coding	KNOWN	NA	NA
chr17	35834526	35834556	5887[gene=ENSMUSG00000001525][PH=69][PH0=0.34][P=1.0e-100]	69	-	3	ENSMUSG00000001525	Tubb5	3'UTR	protein_coding	KNOWN	NA	NA
chr17	35838042	35838072	5947[gene=ENSMUSG00000001525][PH=9][PH0=0.34][P=3.6e-07]	9	-	3	ENSMUSG00000001525	Tubb5	5'UTR	protein_coding	KNOWN	NA	NA
chr17	35834421	35834451	5841[gene=ENSMUSG00000001525][PH=8][PH0=0.34][P=8.4e-06]	8	-	3	ENSMUSG00000001525	Tubb5	3'UTR	protein_coding	KNOWN	NA	NA
chr12	40203148	40203178	1771[gene=ENSMUSG00000001627][PH=22][PH0=0.07][P=1.0e-100]	22	-	3	ENSMUSG00000001627	Ifrd1	3'UTR	protein_coding	KNOWN	NA	NA
chr6	113324809	113324839	10287[gene=ENSMUSG00000001632][PH=9][PH0=0.02][P=1.0e-100]	9	+	2	ENSMUSG00000001632	Brpf1	3'UTR	protein_coding	KNOWN	NA	NA
chr5	148504647	148504677	16217[gene=ENSMUSG00000001687][PH=6][PH0=0.05][P=1.4e-07]	6	-	3	ENSMUSG00000001687	Ubl3	3'UTR	protein_coding	KNOWN	NA	NA
chr5	148505183	148505213	16258[gene=ENSMUSG00000001687][PH=7][PH0=0.05][P=1.1e-09]	7	-	3	ENSMUSG00000001687	Ubl3	3'UTR	protein_coding	KNOWN	NA	NA
chr5	148552088	148552118	16336[gene=ENSMUSG00000001687][PH=10][PH0=0.05][P=1.0e-100]	10	-	2	ENSMUSG00000001687	Ubl3	5'UTR|intron	protein_coding	KNOWN	NA	NA
chr18	56503601	56503631	8097[gene=ENSMUSG00000001700][PH=21][PH0=0.05][P=1.0e-100]	21	+	3	ENSMUSG00000001700	Gramd3	3'UTR	protein_coding	KNOWN	NA	NA
chr18	56503221	56503251	8072[gene=ENSMUSG00000001700][PH=6][PH0=0.05][P=3.9e-07]	6	+	3	ENSMUSG00000001700	Gramd3	3'UTR	protein_coding	KNOWN	NA	NA
chr13	38645974	38646004	3008[gene=ENSMUSG00000001707][PH=7][PH0=0.30][P=1.5e-04]	7	-	3	ENSMUSG00000001707	Eef1e1	3'UTR	protein_coding	KNOWN	NA	NA
chr13	38645774	38645804	2965[gene=ENSMUSG00000001707][PH=91][PH0=0.30][P=1.0e-100]	91	-	3	ENSMUSG00000001707	Eef1e1	3'UTR	protein_coding	KNOWN	NA	NA
chr13	38646028	38646058	3021[gene=ENSMUSG00000001707][PH=10][PH0=0.30][P=8.3e-09]	10	-	3	ENSMUSG00000001707	Eef1e1	3'UTR	protein_coding	KNOWN	NA	NA
chr12	112654449	112654479	10663[gene=ENSMUSG00000001729][PH=13][PH0=0.04][P=1.0e-100]	13	-	3	ENSMUSG00000001729	Akt1	3'UTR	protein_coding	KNOWN	NA	NA
chr7	83652819	83652849	7003[gene=ENSMUSG00000001741][PH=7][PH0=0.01][P=3.4e-13]	7	-	2	ENSMUSG00000001741	Il16	CDS|downstream 10K	protein_coding	KNOWN	NA	NA
chr7	83643621	83643651	6966[gene=ENSMUSG00000001741][PH=4][PH0=0.01][P=4.7e-06]	4	-	2	ENSMUSG00000001741	Il16	3'UTR	protein_coding	KNOWN	NA	NA
chr9	18313181	18313211	2775[gene=ENSMUSG00000001774][PH=30][PH0=0.13][P=1.0e-100]	30	+	3	ENSMUSG00000001774	Chordc1	3'UTR	protein_coding	KNOWN	NA	NA
chr9	18313510	18313540	2831[gene=ENSMUSG00000001774][PH=5][PH0=0.13][P=1.0e-03]	5	+	3	ENSMUSG00000001774	Chordc1	3'UTR	protein_coding	KNOWN	NA	NA
chr9	18313594	18313624	2846[gene=ENSMUSG00000001774][PH=6][PH0=0.13][P=2.6e-05]	6	+	2	ENSMUSG00000001774	Chordc1	3'UTR	protein_coding	KNOWN	NA	NA
chr10	85955740	85955770	10214[gene=ENSMUSG00000001783][PH=3][PH0=0.03][P=6.2e-03]	3	-	3	ENSMUSG00000001783	Rtcb	CDS|downstream 10K	protein_coding	KNOWN	NA	NA
chr9	25307935	25307965	4407[gene=ENSMUSG00000001833][PH=20][PH0=0.21][P=1.0e-100]	20	+	3	ENSMUSG00000001833	2017-09-07	3'UTR	protein_coding	KNOWN	NA	NA
chr9	25308515	25308545	4560[gene=ENSMUSG00000001833][PH=20][PH0=0.21][P=1.0e-100]	20	+	3	ENSMUSG00000001833	2017-09-07	3'UTR	protein_coding	KNOWN	NA	NA
chr9	25308159	25308189	4477[gene=ENSMUSG00000001833][PH=29][PH0=0.21][P=1.0e-100]	29	+	3	ENSMUSG00000001833	2017-09-07	3'UTR	protein_coding	KNOWN	NA	NA
chr9	25307801	25307831	4360[gene=ENSMUSG00000001833][PH=40][PH0=0.21][P=1.0e-100]	40	+	3	ENSMUSG00000001833	2017-09-07	3'UTR	protein_coding	KNOWN	NA	NA
chr9	25296425	25296455	4253[gene=ENSMUSG00000001833][PH=17][PH0=0.21][P=1.0e-100]	17	+	3	ENSMUSG00000001833	2017-09-07	CDS	protein_coding	KNOWN	NA	NA
chr9	25308316	25308346	4528[gene=ENSMUSG00000001833][PH=12][PH0=0.21][P=4.0e-13]	12	+	3	ENSMUSG00000001833	2017-09-07	3'UTR	protein_coding	KNOWN	NA	NA
chr9	25307563	25307593	4328[gene=ENSMUSG00000001833][PH=6][PH0=0.21][P=1.1e-03]	6	+	2	ENSMUSG00000001833	2017-09-07	3'UTR	protein_coding	KNOWN	NA	NA
chr9	25308049	25308079	4440[gene=ENSMUSG00000001833][PH=8][PH0=0.21][P=1.2e-06]	8	+	3	ENSMUSG00000001833	2017-09-07	3'UTR	protein_coding	KNOWN	NA	NA
chr5	143505767	143505797	14891[gene=ENSMUSG00000001847][PH=11][PH0=0.04][P=1.0e-100]	11	-	3	ENSMUSG00000001847	Rac1	3'UTR	protein_coding	KNOWN	NA	NA
chr11	21329050	21329080	2497[gene=ENSMUSG00000001891][PH=3][PH0=0.01][P=2.3e-03]	3	-	2	ENSMUSG00000001891	Ugp2	CDS	protein_coding	KNOWN	NA	NA
chr8	84707071	84707101	5799[gene=ENSMUSG00000001911][PH=10][PH0=0.01][P=1.0e-100]	10	-	3	ENSMUSG00000001911	Nfix	3'UTR|intron	protein_coding	KNOWN	NA	NA
chr8	125418227	125418257	10271[gene=ENSMUSG00000001995][PH=3][PH0=0.01][P=2.6e-04]	3	-	2	ENSMUSG00000001995	Sipa1l2	3'UTR	protein_coding	KNOWN	NA	NA
chr2	127096877	127096907	16469[gene=ENSMUSG00000001999][PH=3][PH0=0.01][P=1.8e-04]	3	+	2	ENSMUSG00000001999	Blvra	CDS|downstream 10K	protein_coding	KNOWN	NA	NA
chrX	73781746	73781776	2960[gene=ENSMUSG00000002010][PH=3][PH0=0.01][P=4.5e-04]	3	-	1	ENSMUSG00000002010	Idh3g	CDS	protein_coding	KNOWN	NA	NA
chrX	73686384	73686414	2916[gene=ENSMUSG00000002015][PH=3][PH0=0.03][P=8.2e-03]	3	-	2	ENSMUSG00000002015	Bcap31	3'UTR	protein_coding	KNOWN	NA	NA
chrX	73686315	73686345	2910[gene=ENSMUSG00000002015][PH=3][PH0=0.03][P=8.2e-03]	3	-	2	ENSMUSG00000002015	Bcap31	3'UTR	protein_coding	KNOWN	NA	NA
chrX	73686231	73686261	2903[gene=ENSMUSG00000002015][PH=6][PH0=0.03][P=2.2e-09]	6	-	3	ENSMUSG00000002015	Bcap31	3'UTR	protein_coding	KNOWN	NA	NA
chr17	75541223	75541253	12096[gene=ENSMUSG00000002017][PH=4][PH0=0.04][P=3.2e-04]	4	-	2	ENSMUSG00000002017	Fam98a	CDS	protein_coding	KNOWN	NA	NA
chr17	75537788	75537818	12080[gene=ENSMUSG00000002017][PH=7][PH0=0.04][P=2.0e-10]	7	-	2	ENSMUSG00000002017	Fam98a	3'UTR	protein_coding	KNOWN	NA	NA
chr17	75541246	75541276	12098[gene=ENSMUSG00000002017][PH=4][PH0=0.04][P=3.2e-04]	4	-	2	ENSMUSG00000002017	Fam98a	CDS	protein_coding	KNOWN	NA	NA
chr9	44803371	44803401	4005[gene=ENSMUSG00000002028][PH=7][PH0=0.07][P=1.7e-08]	7	-	3	ENSMUSG00000002028	Kmt2a	3'UTR	protein_coding	KNOWN	NA	NA
chr9	44804467	44804497	4045[gene=ENSMUSG00000002028][PH=5][PH0=0.07][P=1.2e-04]	5	-	3	ENSMUSG00000002028	Kmt2a	3'UTR	protein_coding	KNOWN	NA	NA
chr9	44806512	44806542	4095[gene=ENSMUSG00000002028][PH=15][PH0=0.07][P=1.0e-100]	15	-	3	ENSMUSG00000002028	Kmt2a	3'UTR	protein_coding	KNOWN	NA	NA
chr9	44804185	44804215	4031[gene=ENSMUSG00000002028][PH=5][PH0=0.07][P=1.2e-04]	5	-	3	ENSMUSG00000002028	Kmt2a	3'UTR	protein_coding	KNOWN	NA	NA
chr9	44822738	44822768	4185[gene=ENSMUSG00000002028][PH=5][PH0=0.07][P=1.2e-04]	5	-	3	ENSMUSG00000002028	Kmt2a	3'UTR|CDS	protein_coding	KNOWN	NA	NA
chr9	44803492	44803522	4016[gene=ENSMUSG00000002028][PH=5][PH0=0.07][P=1.2e-04]	5	-	3	ENSMUSG00000002028	Kmt2a	3'UTR	protein_coding	KNOWN	NA	NA
chr9	44806924	44806954	4129[gene=ENSMUSG00000002028][PH=11][PH0=0.07][P=1.0e-100]	11	-	3	ENSMUSG00000002028	Kmt2a	3'UTR	protein_coding	KNOWN	NA	NA
chr9	44820898	44820928	4168[gene=ENSMUSG00000002028][PH=8][PH0=0.07][P=1.6e-10]	8	-	3	ENSMUSG00000002028	Kmt2a	CDS|downstream 10K	protein_coding	KNOWN	NA	NA
chr9	44806421	44806451	4071[gene=ENSMUSG00000002028][PH=5][PH0=0.07][P=1.2e-04]	5	-	3	ENSMUSG00000002028	Kmt2a	3'UTR	protein_coding	KNOWN	NA	NA
chr9	44822706	44822736	4182[gene=ENSMUSG00000002028][PH=4][PH0=0.07][P=7.0e-03]	4	-	3	ENSMUSG00000002028	Kmt2a	CDS|downstream 10K	protein_coding	KNOWN	NA	NA
chr9	44806841	44806871	4114[gene=ENSMUSG00000002028][PH=4][PH0=0.07][P=7.0e-03]	4	-	2	ENSMUSG00000002028	Kmt2a	3'UTR	protein_coding	KNOWN	NA	NA
chr9	44969749	44969779	4348[gene=ENSMUSG00000002033][PH=8][PH0=0.04][P=8.1e-13]	8	-	3	ENSMUSG00000002033	Cd3g	3'UTR	protein_coding	KNOWN	NA	NA
chr11	78207188	78207218	13444[gene=ENSMUSG00000002052][PH=17][PH0=0.03][P=1.5e-13]	17	-	3	ENSMUSG00000002052	Supt6	3'UTR	protein_coding	KNOWN	NA	NA
chr2	6546150	6546180	677[gene=ENSMUSG00000002107][PH=3][PH0=0.00][P=8.7e-04]	3	-	2	ENSMUSG00000002107	Celf2	3'UTR|intron	protein_coding	KNOWN	NA	NA
chr2	6545086	6545116	657[gene=ENSMUSG00000002107][PH=3][PH0=0.00][P=8.7e-04]	3	-	2	ENSMUSG00000002107	Celf2	3'UTR	protein_coding	KNOWN	NA	NA
chr2	6544980	6545010	651[gene=ENSMUSG00000002107][PH=3][PH0=0.00][P=8.7e-04]	3	-	2	ENSMUSG00000002107	Celf2	3'UTR	protein_coding	KNOWN	NA	NA
chr2	6543139	6543169	615[gene=ENSMUSG00000002107][PH=3][PH0=0.00][P=8.7e-04]	3	-	3	ENSMUSG00000002107	Celf2	3'UTR	protein_coding	KNOWN	NA	NA
chr2	6544260	6544290	636[gene=ENSMUSG00000002107][PH=4][PH0=0.00][P=1.2e-06]	4	-	2	ENSMUSG00000002107	Celf2	3'UTR	protein_coding	KNOWN	NA	NA
chr2	6545352	6545382	667[gene=ENSMUSG00000002107][PH=3][PH0=0.00][P=8.7e-04]	3	-	2	ENSMUSG00000002107	Celf2	3'UTR	protein_coding	KNOWN	NA	NA
chr6	71394638	71394668	5952[gene=ENSMUSG00000002222][PH=4][PH0=0.04][P=7.7e-04]	4	-	3	ENSMUSG00000002222	Rmnd5a	CDS	protein_coding	KNOWN	NA	NA
chr6	71388747	71388777	5890[gene=ENSMUSG00000002222][PH=4][PH0=0.04][P=7.7e-04]	4	-	2	ENSMUSG00000002222	Rmnd5a	3'UTR	protein_coding	KNOWN	NA	NA
chr6	71399180	71399210	5961[gene=ENSMUSG00000002222][PH=4][PH0=0.04][P=7.7e-04]	4	-	2	ENSMUSG00000002222	Rmnd5a	CDS	protein_coding	KNOWN	NA	NA
chr6	71391094	71391124	5911[gene=ENSMUSG00000002222][PH=5][PH0=0.04][P=8.0e-06]	5	-	3	ENSMUSG00000002222	Rmnd5a	3'UTR	protein_coding	KNOWN	NA	NA
chr5	87837089	87837119	7247[gene=ENSMUSG00000002240][PH=2][PH0=0.00][P=4.8e-03]	2	+	2	ENSMUSG00000002240	4930432K09Rik	intron	protein_coding	KNOWN	NA	NA
chr17	28218205	28218235	3704[gene=ENSMUSG00000002257][PH=3][PH0=0.02][P=2.4e-03]	3	+	2	ENSMUSG00000002257	Def6	intron	protein_coding	KNOWN	NA	NA
chr5	8397048	8397078	391[gene=ENSMUSG00000002297][PH=3][PH0=0.01][P=9.2e-04]	3	-	1	ENSMUSG00000002297	Dbf4	3'UTR	protein_coding	KNOWN	NA	NA
chr17	33915342	33915372	5220[gene=ENSMUSG00000092349][PH=4][PH0=0.03][P=2.2e-05]	4	+	2	ENSMUSG00000002307	Daxx	CDS|intron	protein_coding	KNOWN	NA	NA
chr14	55609431	55609461	7415[gene=ENSMUSG00000047098][PH=3][PH0=0.02][P=1.4e-03]	3	+	3	ENSMUSG00000002325	Irf9	3'UTR	protein_coding	KNOWN	NA	NA
chr14	55658804	55658834	4034[gene=ENSMUSG00000002329][PH=6][PH0=0.03][P=9.4e-10]	6	-	3	ENSMUSG00000002329	Mdp1	3'UTR	protein_coding	KNOWN	NA	NA
chr8	70182799	70182829	4263[gene=ENSMUSG00000002342][PH=6][PH0=0.01][P=6.2e-12]	6	+	2	ENSMUSG00000002342	Tmem161a	3'UTR	protein_coding	KNOWN	NA	NA
chr8	71372862	71372892	4530[gene=ENSMUSG00000002396][PH=2][PH0=0.00][P=8.1e-03]	2	+	2	ENSMUSG00000002396	Ocel1	downstream 10K|intron	protein_coding	KNOWN	NA	NA
chr6	39606832	39606862	3718[gene=ENSMUSG00000002413][PH=7][PH0=0.03][P=3.4e-11]	7	-	3	ENSMUSG00000002413	Braf	3'UTR	protein_coding	KNOWN	NA	NA
chr2	181688813	181688843	21971[gene=ENSMUSG00000002458][PH=7][PH0=0.06][P=1.9e-09]	7	-	3	ENSMUSG00000002458	Rgs19	3'UTR|intron	protein_coding	KNOWN	NA	NA
chr16	89788823	89788853	8627[gene=ENSMUSG00000002489][PH=8][PH0=0.01][P=1.0e-100]	8	-	3	ENSMUSG00000002489	Tiam1	3'UTR|intron	protein_coding	KNOWN	NA	NA
chr16	89787675	89787705	8600[gene=ENSMUSG00000002489][PH=3][PH0=0.01][P=4.9e-04]	3	-	3	ENSMUSG00000002489	Tiam1	3'UTR|intron	protein_coding	KNOWN	NA	NA
chr16	89788246	89788276	8611[gene=ENSMUSG00000002489][PH=4][PH0=0.01][P=9.3e-07]	4	-	2	ENSMUSG00000002489	Tiam1	3'UTR|intron	protein_coding	KNOWN	NA	NA
chr2	32307799	32307829	5458[gene=ENSMUSG00000002546][PH=3][PH0=0.01][P=3.7e-04]	3	+	2	ENSMUSG00000002546	Golga2	3'UTR	protein_coding	KNOWN	NA	NA
chr10	128630844	128630874	14908[gene=ENSMUSG00000002578][PH=4][PH0=0.03][P=1.4e-04]	4	-	3	ENSMUSG00000002578	Ikzf4	3'UTR	protein_coding	KNOWN	NA	NA
chr10	128633513	128633543	14927[gene=ENSMUSG00000002578][PH=5][PH0=0.03][P=1.2e-06]	5	-	3	ENSMUSG00000002578	Ikzf4	3'UTR|intron	protein_coding	KNOWN	NA	NA
chr11	98437735	98437765	18225[gene=ENSMUSG00000002580][PH=16][PH0=0.06][P=3.4e-14]	16	-	3	ENSMUSG00000002580	Mien1	3'UTR	protein_coding	KNOWN	NA	NA
chr7	25692502	25692532	1422[gene=ENSMUSG00000063439][PH=6][PH0=0.20][P=1.7e-04]	6	+	3	ENSMUSG00000002603	Tgfb1	3'UTR|CDS	protein_coding	KNOWN	NA	NA
chr7	25692415	25692445	1406[gene=ENSMUSG00000063439][PH=10][PH0=0.20][P=9.4e-11]	10	+	3	ENSMUSG00000002603	Tgfb1	3'UTR|CDS	protein_coding	KNOWN	NA	NA
chr7	25705019	25705049	1492[gene=ENSMUSG00000002603][PH=48][PH0=0.22][P=1.7e-13]	48	+	3	ENSMUSG00000002603	Tgfb1	3'UTR	protein_coding	KNOWN	NA	NA
chr7	25687618	25687648	1338[gene=ENSMUSG00000063439][PH=30][PH0=0.20][P=1.0e-100]	30	+	3	ENSMUSG00000002603	Tgfb1	5'UTR|downstream 10K	protein_coding	KNOWN	NA	NA
chr7	25687730	25687760	1369[gene=ENSMUSG00000063439][PH=5][PH0=0.20][P=4.3e-03]	5	+	2	ENSMUSG00000002603	Tgfb1	5'UTR|downstream 10K	protein_coding	KNOWN	NA	NA
chr7	25712759	25712789	1422[gene=ENSMUSG00000002608][PH=4][PH0=0.02][P=1.4e-05]	4	-	3	ENSMUSG00000002608	Ccdc97	3'UTR	protein_coding	KNOWN	NA	NA
chr7	34184649	34184679	2651[gene=ENSMUSG00000002635][PH=4][PH0=0.02][P=7.7e-06]	4	-	2	ENSMUSG00000002635	Pdcd2l	3'UTR	protein_coding	KNOWN	NA	NA
chr12	81573601	81573631	6033[gene=ENSMUSG00000002679][PH=4][PH0=0.02][P=7.7e-06]	4	-	2	ENSMUSG00000002679	Med6	3'UTR	protein_coding	KNOWN	NA	NA
chr11	34090863	34090893	5823[gene=ENSMUSG00000002699][PH=92][PH0=0.22][P=1.7e-13]	92	+	3	ENSMUSG00000002699	Lcp2	3'UTR	protein_coding	KNOWN	NA	NA
chr11	34091021	34091051	5902[gene=ENSMUSG00000002699][PH=19][PH0=0.22][P=1.7e-13]	19	+	3	ENSMUSG00000002699	Lcp2	3'UTR	protein_coding	KNOWN	NA	NA
chr11	34090588	34090618	5772[gene=ENSMUSG00000002699][PH=14][PH0=0.22][P=1.7e-13]	14	+	3	ENSMUSG00000002699	Lcp2	CDS|downstream 10K	protein_coding	KNOWN	NA	NA
chr11	34091196	34091226	5942[gene=ENSMUSG00000002699][PH=6][PH0=0.22][P=1.1e-03]	6	+	3	ENSMUSG00000002699	Lcp2	3'UTR	protein_coding	KNOWN	NA	NA
chr11	34090974	34091004	5881[gene=ENSMUSG00000002699][PH=12][PH0=0.22][P=5.0e-13]	12	+	3	ENSMUSG00000002699	Lcp2	3'UTR	protein_coding	KNOWN	NA	NA
chr2	166915219	166915249	22901[gene=ENSMUSG00000002718][PH=8][PH0=0.03][P=4.5e-13]	8	+	3	ENSMUSG00000002718	Cse1l	CDS|intron	protein_coding	KNOWN	NA	NA
chr2	76696236	76696266	10815[gene=ENSMUSG00000002733][PH=20][PH0=0.07][P=1.0e-100]	20	+	3	ENSMUSG00000002733	Plekha3	3'UTR	protein_coding	KNOWN	NA	NA
chr2	76696487	76696517	10837[gene=ENSMUSG00000002733][PH=12][PH0=0.07][P=1.0e-100]	12	+	3	ENSMUSG00000002733	Plekha3	3'UTR	protein_coding	KNOWN	NA	NA
chr2	76696522	76696552	10847[gene=ENSMUSG00000002733][PH=5][PH0=0.07][P=5.2e-05]	5	+	3	ENSMUSG00000002733	Plekha3	3'UTR	protein_coding	KNOWN	NA	NA
chr2	76696044	76696074	10796[gene=ENSMUSG00000002733][PH=4][PH0=0.07][P=3.0e-03]	4	+	3	ENSMUSG00000002733	Plekha3	3'UTR	protein_coding	KNOWN	NA	NA
chr5	135244915	135244945	13910[gene=ENSMUSG00000002748][PH=4][PH0=0.03][P=3.5e-04]	4	+	2	ENSMUSG00000002748	Baz1b	3'UTR	protein_coding	KNOWN	NA	NA
chr5	135230249	135230279	13894[gene=ENSMUSG00000002748][PH=4][PH0=0.03][P=3.5e-04]	4	+	3	ENSMUSG00000002748	Baz1b	CDS	protein_coding	KNOWN	NA	NA
chr5	135244944	135244974	13912[gene=ENSMUSG00000002748][PH=5][PH0=0.03][P=2.9e-06]	5	+	3	ENSMUSG00000002748	Baz1b	3'UTR	protein_coding	KNOWN	NA	NA
chr5	135230182	135230212	13887[gene=ENSMUSG00000002748][PH=4][PH0=0.03][P=3.5e-04]	4	+	2	ENSMUSG00000002748	Baz1b	CDS	protein_coding	KNOWN	NA	NA
chr9	21273479	21273509	3235[gene=ENSMUSG00000002820][PH=9][PH0=0.03][P=1.0e-100]	9	+	3	ENSMUSG00000002820	Atg4d	3'UTR	protein_coding	KNOWN	NA	NA
chr17	56092511	56092541	9271[gene=ENSMUSG00000002833][PH=3][PH0=0.01][P=2.4e-04]	3	+	1	ENSMUSG00000002833	Hdgfrp2	intron	protein_coding	KNOWN	NA	NA
chr16	38591241	38591271	6326[gene=ENSMUSG00000002845][PH=5][PH0=0.04][P=2.5e-06]	5	+	2	ENSMUSG00000002845	Tmem39a	3'UTR|intron	protein_coding	KNOWN	NA	NA
chr16	38591055	38591085	6314[gene=ENSMUSG00000002845][PH=5][PH0=0.04][P=2.5e-06]	5	+	2	ENSMUSG00000002845	Tmem39a	CDS|downstream 10K|intron	protein_coding	KNOWN	NA	NA
chr16	38591099	38591129	6317[gene=ENSMUSG00000002845][PH=4][PH0=0.04][P=2.8e-04]	4	+	3	ENSMUSG00000002845	Tmem39a	CDS|downstream 10K|intron	protein_coding	KNOWN	NA	NA
chr16	38518412	38518442	4561[gene=ENSMUSG00000002846][PH=9][PH0=0.03][P=1.0e-100]	9	-	3	ENSMUSG00000002846	Timmdc1	CDS|downstream 10K	protein_coding	KNOWN	NA	NA
chr16	38498382	38498412	4532[gene=ENSMUSG00000002846][PH=3][PH0=0.03][P=9.8e-03]	3	-	2	ENSMUSG00000002846	Timmdc1	3'UTR	protein_coding	KNOWN	NA	NA
chr16	38498413	38498443	4536[gene=ENSMUSG00000002846][PH=3][PH0=0.03][P=9.8e-03]	3	-	2	ENSMUSG00000002846	Timmdc1	3'UTR	protein_coding	KNOWN	NA	NA
chr6	88883483	88883513	8806[gene=ENSMUSG00000002870][PH=4][PH0=0.02][P=2.0e-05]	4	-	2	ENSMUSG00000002870	Mcm2	3'UTR	protein_coding	KNOWN	NA	NA
chr6	88883772	88883802	8818[gene=ENSMUSG00000002870][PH=4][PH0=0.02][P=2.0e-05]	4	-	2	ENSMUSG00000002870	Mcm2	3'UTR	protein_coding	KNOWN	NA	NA
chr1	52458889	52458919	5560[gene=ENSMUSG00000002881][PH=7][PH0=0.03][P=6.6e-11]	7	-	3	ENSMUSG00000002881	Nab1	3'UTR	protein_coding	KNOWN	NA	NA
chr6	120482893	120482923	11121[gene=ENSMUSG00000002897][PH=15][PH0=0.06][P=1.8e-13]	15	+	3	ENSMUSG00000002897	Il17ra	3'UTR	protein_coding	KNOWN	NA	NA
chr8	4246123	4246153	181[gene=ENSMUSG00000046589][PH=12][PH0=0.04][P=1.0e-100]	12	+	3	ENSMUSG00000002948	Map2k7	3'UTR|intron	protein_coding	KNOWN	NA	NA
chr7	141616963	141616993	13945[gene=ENSMUSG00000002957][PH=3][PH0=0.01][P=9.6e-04]	3	+	3	ENSMUSG00000002957	Ap2a2	intron	protein_coding	KNOWN	NA	NA
chr7	19701343	19701373	1159[gene=ENSMUSG00000002984][PH=5][PH0=0.03][P=3.2e-07]	5	-	3	ENSMUSG00000002984	Tomm40	3'UTR	protein_coding	KNOWN	NA	NA
chr6	134925141	134925171	12654[gene=ENSMUSG00000003031][PH=11][PH0=0.37][P=1.4e-09]	11	+	2	ENSMUSG00000003031	Cdkn1b	3'UTR	protein_coding	KNOWN	NA	NA
chr6	134925293	134925323	12707[gene=ENSMUSG00000003031][PH=67][PH0=0.37][P=9.0e-14]	67	+	3	ENSMUSG00000003031	Cdkn1b	3'UTR	protein_coding	KNOWN	NA	NA
chr6	134924760	134924790	12621[gene=ENSMUSG00000003031][PH=10][PH0=0.37][P=3.7e-08]	10	+	3	ENSMUSG00000003031	Cdkn1b	3'UTR	protein_coding	KNOWN	NA	NA
chr8	72180827	72180857	4802[gene=ENSMUSG00000003037][PH=3][PH0=0.02][P=4.3e-03]	3	+	2	ENSMUSG00000003037	Rab8a	3'UTR	protein_coding	KNOWN	NA	NA
chr8	72222760	72222790	4830[gene=ENSMUSG00000003039][PH=4][PH0=0.03][P=4.3e-05]	4	+	3	ENSMUSG00000003039	Fam32a	3'UTR	protein_coding	KNOWN	NA	NA
chr13	19358013	19358043	1224[gene=ENSMUSG00000003062][PH=3][PH0=0.01][P=5.1e-04]	3	-	1	ENSMUSG00000003062	Stard3nl	3'UTR	protein_coding	KNOWN	NA	NA
chr10	80116384	80116414	9597[gene=ENSMUSG00000003068][PH=8][PH0=0.03][P=7.4e-14]	8	+	2	ENSMUSG00000003068	Stk11	5'UTR	protein_coding	KNOWN	NA	NA
chr7	17004975	17005005	809[gene=ENSMUSG00000003099][PH=17][PH0=0.04][P=1.0e-100]	17	-	3	ENSMUSG00000003099	Ppp5c	3'UTR	protein_coding	KNOWN	NA	NA
chr7	17018591	17018621	829[gene=ENSMUSG00000003099][PH=4][PH0=0.04][P=4.1e-04]	4	-	2	ENSMUSG00000003099	Ppp5c	intron	protein_coding	KNOWN	NA	NA
chr11	98277589	98277619	19828[gene=ENSMUSG00000003119][PH=4][PH0=0.04][P=6.8e-04]	4	+	2	ENSMUSG00000003119	Cdk12	NA	protein_coding	KNOWN	NA	NA
chr9	45965526	45965556	4634[gene=ENSMUSG00000003131][PH=10][PH0=0.10][P=8.8e-14]	10	-	3	ENSMUSG00000003131	Pafah1b2	3'UTR	protein_coding	KNOWN	NA	NA
chr9	45968223	45968253	4712[gene=ENSMUSG00000003131][PH=10][PH0=0.10][P=8.8e-14]	10	-	3	ENSMUSG00000003131	Pafah1b2	3'UTR	protein_coding	KNOWN	NA	NA
chr9	45967705	45967735	4683[gene=ENSMUSG00000003131][PH=13][PH0=0.10][P=1.0e-100]	13	-	3	ENSMUSG00000003131	Pafah1b2	3'UTR	protein_coding	KNOWN	NA	NA
chr6	122729405	122729435	13827[gene=ENSMUSG00000003153][PH=6][PH0=0.01][P=2.3e-12]	6	-	3	ENSMUSG00000003153	Slc2a3	3'UTR	protein_coding	KNOWN	NA	NA
chr6	122843076	122843106	11319[gene=ENSMUSG00000003154][PH=6][PH0=0.02][P=6.5e-10]	6	+	2	ENSMUSG00000003154	Foxj2	3'UTR	protein_coding	KNOWN	NA	NA
chr5	8068288	8068318	458[gene=ENSMUSG00000003161][PH=4][PH0=0.02][P=2.9e-05]	4	+	2	ENSMUSG00000003161	Sri	3'UTR	protein_coding	KNOWN	NA	NA
chr10	58476345	58476375	7232[gene=ENSMUSG00000003226][PH=6][PH0=0.10][P=1.0e-05]	6	+	2	ENSMUSG00000003226	Ranbp2	CDS	protein_coding	KNOWN	NA	NA
chr10	58460541	58460571	7167[gene=ENSMUSG00000003226][PH=6][PH0=0.10][P=1.0e-05]	6	+	2	ENSMUSG00000003226	Ranbp2	CDS	protein_coding	KNOWN	NA	NA
chr10	58479094	58479124	7266[gene=ENSMUSG00000003226][PH=5][PH0=0.10][P=5.1e-04]	5	+	3	ENSMUSG00000003226	Ranbp2	CDS	protein_coding	KNOWN	NA	NA
chr10	58494011	58494041	7351[gene=ENSMUSG00000003226][PH=11][PH0=0.10][P=1.7e-13]	11	+	3	ENSMUSG00000003226	Ranbp2	3'UTR	protein_coding	KNOWN	NA	NA
chr7	45807606	45807636	4212[gene=ENSMUSG00000003269][PH=10][PH0=0.03][P=1.0e-100]	10	-	3	ENSMUSG00000003269	Cyth2	3'UTR	protein_coding	KNOWN	NA	NA
chr7	45734037	45734067	4189[gene=ENSMUSG00000003271][PH=9][PH0=0.01][P=1.0e-100]	9	-	2	ENSMUSG00000003271	Sult2b1	CDS	protein_coding	KNOWN	NA	NA
chr9	21229739	21229769	1225[gene=ENSMUSG00000003308][PH=5][PH0=0.02][P=5.2e-08]	5	-	2	ENSMUSG00000003308	Keap1	3'UTR	protein_coding	KNOWN	NA	NA
chr8	111156361	111156391	8189[gene=ENSMUSG00000003316][PH=6][PH0=0.02][P=3.4e-09]	6	-	2	ENSMUSG00000003316	Glg1	3'UTR	protein_coding	KNOWN	NA	NA
chr10	80640256	80640286	9833[gene=ENSMUSG00000003345][PH=8][PH0=0.02][P=8.4e-14]	8	+	2	ENSMUSG00000003345	Csnk1g2	3'UTR	protein_coding	KNOWN	NA	NA
chr7	24972569	24972599	1294[gene=ENSMUSG00000003380][PH=5][PH0=0.01][P=8.5e-09]	5	-	2	ENSMUSG00000003380	Rabac1	5'UTR|CDS|downstream 10K	protein_coding	KNOWN	NA	NA
chr3	87539710	87539740	9171[gene=ENSMUSG00000003382][PH=5][PH0=0.11][P=3.6e-04]	5	+	1	ENSMUSG00000003382	Etv3	3'UTR	protein_coding	KNOWN	NA	NA
chr3	87539678	87539708	9163[gene=ENSMUSG00000003382][PH=5][PH0=0.11][P=3.6e-04]	5	+	2	ENSMUSG00000003382	Etv3	3'UTR	protein_coding	KNOWN	NA	NA
chr2	13652824	13652854	1465[gene=ENSMUSG00000003418][PH=4][PH0=0.02][P=2.0e-04]	4	-	3	ENSMUSG00000003418	St8sia6	3'UTR	protein_coding	KNOWN	NA	NA
chr2	13652379	13652409	1452[gene=ENSMUSG00000003418][PH=4][PH0=0.02][P=2.0e-04]	4	-	3	ENSMUSG00000003418	St8sia6	3'UTR	protein_coding	KNOWN	NA	NA
chr2	13655386	13655416	1505[gene=ENSMUSG00000003418][PH=8][PH0=0.02][P=4.6e-13]	8	-	3	ENSMUSG00000003418	St8sia6	3'UTR	protein_coding	KNOWN	NA	NA
chr7	45123030	45123060	3609[gene=ENSMUSG00000003429][PH=139][PH0=0.45][P=1.0e-100]	139	-	3	ENSMUSG00000003429	Rps11	downstream 10K|intron	protein_coding	KNOWN	NA	NA
chr1	172066033	172066063	23353[gene=ENSMUSG00000003458][PH=3][PH0=0.02][P=5.4e-03]	3	-	2	ENSMUSG00000003458	Ncstn	3'UTR	protein_coding	KNOWN	NA	NA
chr1	172134993	172135023	17860[gene=ENSMUSG00000003464][PH=6][PH0=0.02][P=5.0e-11]	6	+	3	ENSMUSG00000003464	Pex19	3'UTR	protein_coding	KNOWN	NA	NA
chr17	35681638	35681668	5802[gene=ENSMUSG00000003534][PH=3][PH0=0.01][P=2.1e-04]	3	-	3	ENSMUSG00000003534	Ddr1	3'UTR	protein_coding	KNOWN	NA	NA
chr17	35822553	35822583	5946[gene=ENSMUSG00000003541][PH=6][PH0=0.06][P=1.4e-07]	6	+	3	ENSMUSG00000003541	Ier3	3'UTR	protein_coding	KNOWN	NA	NA
chr17	35822597	35822627	5953[gene=ENSMUSG00000003541][PH=7][PH0=0.06][P=1.5e-09]	7	+	2	ENSMUSG00000003541	Ier3	3'UTR	protein_coding	KNOWN	NA	NA
chr17	35822501	35822531	5938[gene=ENSMUSG00000003541][PH=4][PH0=0.06][P=7.2e-04]	4	+	2	ENSMUSG00000003541	Ier3	3'UTR	protein_coding	KNOWN	NA	NA
chr7	19303410	19303440	953[gene=ENSMUSG00000003545][PH=4][PH0=0.01][P=3.9e-06]	4	-	2	ENSMUSG00000003545	Fosb	3'UTR	protein_coding	KNOWN	NA	NA
chr2	112500921	112500951	14111[gene=ENSMUSG00000003604][PH=3][PH0=0.01][P=2.7e-03]	3	+	2	ENSMUSG00000003604	Aven	intron	protein_coding	KNOWN	NA	NA
chr2	127242543	127242573	16264[gene=ENSMUSG00000003662][PH=3][PH0=0.01][P=5.1e-04]	3	-	2	ENSMUSG00000003662	Ciao1	3'UTR	protein_coding	KNOWN	NA	NA
chr4	129647395	129647425	10628[gene=ENSMUSG00000003731][PH=12][PH0=0.05][P=1.0e-100]	12	-	3	ENSMUSG00000003731	Kpna6	3'UTR	protein_coding	KNOWN	NA	NA
chr4	129644024	129644054	10581[gene=ENSMUSG00000003731][PH=8][PH0=0.05][P=1.5e-11]	8	-	2	ENSMUSG00000003731	Kpna6	3'UTR	protein_coding	KNOWN	NA	NA
chr10	53905395	53905425	5622[gene=ENSMUSG00000003746][PH=6][PH0=0.04][P=2.9e-07]	6	-	3	ENSMUSG00000003746	Man1a	3'UTR	protein_coding	KNOWN	NA	NA
chr10	53906970	53907000	5677[gene=ENSMUSG00000003746][PH=5][PH0=0.04][P=3.3e-05]	5	-	3	ENSMUSG00000003746	Man1a	3'UTR	protein_coding	KNOWN	NA	NA
chr10	53906237	53906267	5661[gene=ENSMUSG00000003746][PH=5][PH0=0.04][P=3.3e-05]	5	-	3	ENSMUSG00000003746	Man1a	3'UTR	protein_coding	KNOWN	NA	NA
chr10	53907160	53907190	5702[gene=ENSMUSG00000003746][PH=4][PH0=0.04][P=3.0e-03]	4	-	2	ENSMUSG00000003746	Man1a	3'UTR	protein_coding	KNOWN	NA	NA
chr10	53907016	53907046	5689[gene=ENSMUSG00000003746][PH=11][PH0=0.04][P=1.0e-100]	11	-	3	ENSMUSG00000003746	Man1a	3'UTR	protein_coding	KNOWN	NA	NA
chr7	27207250	27207280	1532[gene=ENSMUSG00000003752][PH=10][PH0=0.02][P=9.4e-14]	10	-	3	ENSMUSG00000003752	Itpkc	3'UTR	protein_coding	KNOWN	NA	NA
chr8	84869054	84869084	8673[gene=ENSMUSG00000003808][PH=3][PH0=0.02][P=9.9e-04]	3	+	2	ENSMUSG00000003808	Farsa	3'UTR	protein_coding	KNOWN	NA	NA
chr8	107372198	107372228	12128[gene=ENSMUSG00000003847][PH=4][PH0=0.07][P=7.7e-03]	4	+	2	ENSMUSG00000003847	Nfat5	3'UTR|intron	protein_coding	KNOWN	NA	NA
chr8	107375446	107375476	12201[gene=ENSMUSG00000003847][PH=6][PH0=0.07][P=1.7e-06]	6	+	3	ENSMUSG00000003847	Nfat5	3'UTR|intron	protein_coding	KNOWN	NA	NA
chr8	107376752	107376782	12225[gene=ENSMUSG00000003847][PH=4][PH0=0.07][P=7.7e-03]	4	+	3	ENSMUSG00000003847	Nfat5	3'UTR|intron	protein_coding	KNOWN	NA	NA
chr8	107373515	107373545	12153[gene=ENSMUSG00000003847][PH=17][PH0=0.07][P=1.0e-100]	17	+	3	ENSMUSG00000003847	Nfat5	3'UTR|intron	protein_coding	KNOWN	NA	NA
chr8	107378619	107378649	12265[gene=ENSMUSG00000003847][PH=5][PH0=0.07][P=1.3e-04]	5	+	3	ENSMUSG00000003847	Nfat5	3'UTR|intron	protein_coding	KNOWN	NA	NA
chr7	45421862	45421892	4023[gene=ENSMUSG00000003868][PH=4][PH0=0.01][P=3.0e-06]	4	-	2	ENSMUSG00000003868	Ruvbl2	3'UTR	protein_coding	KNOWN	NA	NA
chr7	45461793	45461823	4076[gene=ENSMUSG00000003873][PH=34][PH0=0.13][P=4.6e-14]	34	-	3	ENSMUSG00000003873	Bax	3'UTR	protein_coding	KNOWN	NA	NA
chr15	9506649	9506679	692[gene=ENSMUSG00000003882][PH=4][PH0=0.07][P=3.8e-03]	4	-	2	ENSMUSG00000003882	Il7r	3'UTR	protein_coding	KNOWN	NA	NA
chr15	9506349	9506379	674[gene=ENSMUSG00000003882][PH=7][PH0=0.07][P=1.2e-08]	7	-	3	ENSMUSG00000003882	Il7r	3'UTR	protein_coding	KNOWN	NA	NA
chr17	33333130	33333160	4530[gene=ENSMUSG00000003929][PH=5][PH0=0.02][P=4.5e-08]	5	-	2	ENSMUSG00000003929	Zfp81	3'UTR	protein_coding	KNOWN	NA	NA
chr11	90277958	90277988	17803[gene=ENSMUSG00000003948][PH=7][PH0=0.02][P=6.0e-13]	7	+	2	ENSMUSG00000003948	Mmd	3'UTR	protein_coding	KNOWN	NA	NA
chr11	90278070	90278100	17814[gene=ENSMUSG00000003948][PH=6][PH0=0.02][P=3.5e-10]	6	+	3	ENSMUSG00000003948	Mmd	3'UTR	protein_coding	KNOWN	NA	NA
chr11	90277000	90277030	17776[gene=ENSMUSG00000003948][PH=5][PH0=0.02][P=1.1e-07]	5	+	2	ENSMUSG00000003948	Mmd	3'UTR	protein_coding	KNOWN	NA	NA
chr11	90277884	90277914	17796[gene=ENSMUSG00000003948][PH=3][PH0=0.02][P=5.3e-03]	3	+	2	ENSMUSG00000003948	Mmd	3'UTR	protein_coding	KNOWN	NA	NA
chr16	36043866	36043896	4322[gene=ENSMUSG00000003955][PH=3][PH0=0.03][P=8.2e-03]	3	-	1	ENSMUSG00000003955	Fam162a	3'UTR	protein_coding	KNOWN	NA	NA
chr15	76904848	76904878	5858[gene=ENSMUSG00000055041][PH=4][PH0=0.10][P=4.7e-03]	4	+	3	ENSMUSG00000003970	Rpl8	CDS|downstream 10K	protein_coding	KNOWN	NA	NA
chr15	76904589	76904619	5850[gene=ENSMUSG00000055041][PH=4][PH0=0.10][P=4.7e-03]	4	+	2	ENSMUSG00000003970	Rpl8	CDS|downstream 10K	protein_coding	KNOWN	NA	NA
chr15	76904871	76904901	5861[gene=ENSMUSG00000055041][PH=5][PH0=0.10][P=1.2e-04]	5	+	3	ENSMUSG00000003970	Rpl8	CDS|downstream 10K	protein_coding	KNOWN	NA	NA
chr15	76905895	76905925	5879[gene=ENSMUSG00000055041][PH=8][PH0=0.10][P=5.9e-10]	8	+	2	ENSMUSG00000003970	Rpl8	CDS|downstream 10K	protein_coding	KNOWN	NA	NA
chr13	91651172	91651202	9760[gene=ENSMUSG00000003992][PH=3][PH0=0.01][P=7.2e-03]	3	+	2	ENSMUSG00000003992	Ssbp2	intron	protein_coding	KNOWN	NA	NA
chr11	100887625	100887655	19524[gene=ENSMUSG00000004040][PH=4][PH0=0.03][P=3.7e-04]	4	-	3	ENSMUSG00000004040	Stat3	3'UTR	protein_coding	KNOWN	NA	NA
chr11	100886825	100886855	19504[gene=ENSMUSG00000004040][PH=4][PH0=0.03][P=3.7e-04]	4	-	2	ENSMUSG00000004040	Stat3	3'UTR	protein_coding	KNOWN	NA	NA
chr11	100888080	100888110	19535[gene=ENSMUSG00000004040][PH=4][PH0=0.03][P=3.7e-04]	4	-	2	ENSMUSG00000004040	Stat3	3'UTR	protein_coding	KNOWN	NA	NA
chr11	100884788	100884818	20326[gene=ENSMUSG00000004043][PH=19][PH0=0.06][P=1.1e-13]	19	+	3	ENSMUSG00000004043	Stat5a	3'UTR	protein_coding	KNOWN	NA	NA
chr11	100885111	100885141	20349[gene=ENSMUSG00000004043][PH=4][PH0=0.06][P=1.8e-03]	4	+	2	ENSMUSG00000004043	Stat5a	3'UTR	protein_coding	KNOWN	NA	NA
chr16	4707431	4707461	145[gene=ENSMUSG00000004069][PH=3][PH0=0.01][P=1.0e-03]	3	+	1	ENSMUSG00000004069	Dnaja3	3'UTR	protein_coding	KNOWN	NA	NA
chr16	4707126	4707156	138[gene=ENSMUSG00000004069][PH=7][PH0=0.01][P=1.0e-100]	7	+	2	ENSMUSG00000004069	Dnaja3	3'UTR	protein_coding	KNOWN	NA	NA
chr16	4768050	4768080	509[gene=ENSMUSG00000004071][PH=4][PH0=0.02][P=7.9e-05]	4	-	3	ENSMUSG00000004071	Cdip1	3'UTR|intron	protein_coding	KNOWN	NA	NA
chr16	4767910	4767940	502[gene=ENSMUSG00000004071][PH=3][PH0=0.02][P=9.6e-03]	3	-	2	ENSMUSG00000004071	Cdip1	3'UTR|intron	protein_coding	KNOWN	NA	NA
chr9	14510507	14510537	2308[gene=ENSMUSG00000004096][PH=4][PH0=0.03][P=4.0e-05]	4	+	3	ENSMUSG00000004096	Cwc15	3'UTR	protein_coding	KNOWN	NA	NA
chr9	20907276	20907306	1018[gene=ENSMUSG00000004099][PH=3][PH0=0.01][P=5.8e-04]	3	-	2	ENSMUSG00000004099	Dnmt1	3'UTR	protein_coding	KNOWN	NA	NA
chr9	20907213	20907243	1013[gene=ENSMUSG00000004099][PH=5][PH0=0.01][P=3.8e-09]	5	-	3	ENSMUSG00000004099	Dnmt1	3'UTR	protein_coding	KNOWN	NA	NA
chr9	20890802	20890832	3066[gene=ENSMUSG00000004100][PH=59][PH0=0.37][P=4.2e-14]	59	+	3	ENSMUSG00000004100	Ppan	intron	protein_coding	KNOWN	NA	NA
chr9	20889525	20889555	3027[gene=ENSMUSG00000004100][PH=67][PH0=0.37][P=4.2e-14]	67	+	3	ENSMUSG00000004100	Ppan	intron	protein_coding	KNOWN	NA	NA
chr10	60302101	60302131	7585[gene=ENSMUSG00000004207][PH=4][PH0=0.02][P=1.3e-05]	4	+	2	ENSMUSG00000004207	Psap	3'UTR	protein_coding	KNOWN	NA	NA
chr6	124742586	124742616	14017[gene=ENSMUSG00000004263][PH=26][PH0=0.24][P=1.0e-100]	26	-	3	ENSMUSG00000004263	Atn1	3'UTR|intron	protein_coding	KNOWN	NA	NA
chr6	124741230	124741260	13974[gene=ENSMUSG00000072772][PH=130][PH0=0.42][P=3.6e-14]	130	-	3	ENSMUSG00000004263	Atn1	5'UTR|downstream 10K|intron	protein_coding	KNOWN	NA	NA
chr6	124715306	124715336	11447[gene=ENSMUSG00000004264][PH=5][PH0=0.10][P=1.8e-04]	5	+	2	ENSMUSG00000004264	Phb2	intron	protein_coding	KNOWN	NA	NA
chr6	124715471	124715501	11462[gene=ENSMUSG00000004264][PH=18][PH0=0.10][P=1.0e-100]	18	+	3	ENSMUSG00000004264	Phb2	intron	protein_coding	KNOWN	NA	NA
chr6	124712735	124712765	11431[gene=ENSMUSG00000004270][PH=9][PH0=0.02][P=1.0e-100]	9	+	3	ENSMUSG00000004264	Phb2	CDS|downstream 10K	protein_coding	KNOWN	NA	NA
chr6	124720724	124720754	13904[gene=ENSMUSG00000004266][PH=4][PH0=0.05][P=6.8e-04]	4	-	3	ENSMUSG00000004266	Ptpn6	3'UTR	protein_coding	KNOWN	NA	NA
chr6	124720773	124720803	13920[gene=ENSMUSG00000004266][PH=16][PH0=0.05][P=8.4e-14]	16	-	3	ENSMUSG00000004266	Ptpn6	3'UTR	protein_coding	KNOWN	NA	NA
chr8	60910446	60910476	3453[gene=ENSMUSG00000004319][PH=11][PH0=0.03][P=5.0e-13]	11	-	3	ENSMUSG00000004319	Clcn3	3'UTR	protein_coding	KNOWN	NA	NA
chr8	60911924	60911954	3489[gene=ENSMUSG00000004319][PH=13][PH0=0.03][P=5.0e-13]	13	-	3	ENSMUSG00000004319	Clcn3	3'UTR	protein_coding	KNOWN	NA	NA
chr8	60910399	60910429	3441[gene=ENSMUSG00000004319][PH=4][PH0=0.03][P=5.3e-04]	4	-	3	ENSMUSG00000004319	Clcn3	3'UTR	protein_coding	KNOWN	NA	NA
chr10	88746644	88746674	10335[gene=ENSMUSG00000004356][PH=5][PH0=0.02][P=7.0e-07]	5	-	3	ENSMUSG00000004356	Utp20	3'UTR	protein_coding	KNOWN	NA	NA
chr1	80271551	80271581	9552[gene=ENSMUSG00000004364][PH=4][PH0=0.07][P=7.7e-03]	4	-	3	ENSMUSG00000004364	Cul3	CDS|intron	protein_coding	KNOWN	NA	NA
chr1	80265780	80265810	9502[gene=ENSMUSG00000004364][PH=5][PH0=0.07][P=1.3e-04]	5	-	2	ENSMUSG00000004364	Cul3	3'UTR	protein_coding	KNOWN	NA	NA
chr1	80280912	80280942	9588[gene=ENSMUSG00000004364][PH=4][PH0=0.07][P=7.7e-03]	4	-	2	ENSMUSG00000004364	Cul3	CDS|downstream 10K	protein_coding	KNOWN	NA	NA
chr1	80282626	80282656	9610[gene=ENSMUSG00000004364][PH=12][PH0=0.07][P=1.0e-100]	12	-	3	ENSMUSG00000004364	Cul3	CDS|downstream 10K	protein_coding	KNOWN	NA	NA
chr8	73334870	73334900	4847[gene=ENSMUSG00000004383][PH=3][PH0=0.00][P=1.7e-04]	3	-	1	ENSMUSG00000004383	Large	intron	protein_coding	KNOWN	NA	NA
chr16	22871811	22871841	2708[gene=ENSMUSG00000004460][PH=5][PH0=0.02][P=2.4e-07]	5	+	2	ENSMUSG00000004460	Dnajb11	3'UTR|intron	protein_coding	KNOWN	NA	NA
chr5	113842754	113842784	9769[gene=ENSMUSG00000004530][PH=5][PH0=0.01][P=1.5e-08]	5	-	2	ENSMUSG00000004530	Coro1c	3'UTR	protein_coding	KNOWN	NA	NA
chr6	52766359	52766389	5644[gene=ENSMUSG00000004535][PH=6][PH0=0.04][P=2.9e-08]	6	+	3	ENSMUSG00000004535	Tax1bp1	3'UTR	protein_coding	KNOWN	NA	NA
chr6	52766646	52766676	5660[gene=ENSMUSG00000004535][PH=5][PH0=0.04][P=4.0e-06]	5	+	2	ENSMUSG00000004535	Tax1bp1	3'UTR	protein_coding	KNOWN	NA	NA
chr6	52766696	52766726	5673[gene=ENSMUSG00000004535][PH=8][PH0=0.04][P=7.5e-13]	8	+	3	ENSMUSG00000004535	Tax1bp1	3'UTR	protein_coding	KNOWN	NA	NA
chr8	3515114	3515144	101[gene=ENSMUSG00000004567][PH=5][PH0=0.02][P=3.3e-08]	5	+	3	ENSMUSG00000004567	Mcoln1	3'UTR	protein_coding	KNOWN	NA	NA
chr3	142792629	142792659	12636[gene=ENSMUSG00000004591][PH=5][PH0=0.03][P=4.3e-06]	5	-	3	ENSMUSG00000004591	Pkn2	3'UTR	protein_coding	KNOWN	NA	NA
chr3	142792790	142792820	12654[gene=ENSMUSG00000004591][PH=5][PH0=0.03][P=4.3e-06]	5	-	3	ENSMUSG00000004591	Pkn2	3'UTR	protein_coding	KNOWN	NA	NA
chr8	114807727	114807757	13190[gene=ENSMUSG00000004637][PH=3][PH0=0.00][P=2.3e-04]	3	+	1	ENSMUSG00000004637	Wwox	intron	protein_coding	KNOWN	NA	NA
chr5	33640634	33640664	2736[gene=ENSMUSG00000004642][PH=3][PH0=0.02][P=1.5e-03]	3	-	2	ENSMUSG00000004642	Slbp	3'UTR|intron	protein_coding	KNOWN	NA	NA
chr9	57792072	57792102	6138[gene=ENSMUSG00000004661][PH=3][PH0=0.01][P=1.2e-03]	3	-	2	ENSMUSG00000004661	Arid3b	3'UTR|intron	protein_coding	KNOWN	NA	NA
chr9	64715327	64715357	7666[gene=ENSMUSG00000004771][PH=3][PH0=0.03][P=8.7e-03]	3	-	2	ENSMUSG00000004771	Rab11a	3'UTR	protein_coding	KNOWN	NA	NA
chr9	64715306	64715336	7664[gene=ENSMUSG00000004771][PH=3][PH0=0.03][P=8.7e-03]	3	-	2	ENSMUSG00000004771	Rab11a	3'UTR	protein_coding	KNOWN	NA	NA
chr12	85134039	85134069	9682[gene=ENSMUSG00000004789][PH=14][PH0=0.04][P=1.0e-100]	14	+	3	ENSMUSG00000004789	Dlst	3'UTR	protein_coding	KNOWN	NA	NA
chr11	61777079	61777109	9809[gene=ENSMUSG00000004798][PH=4][PH0=0.01][P=7.2e-06]	4	-	2	ENSMUSG00000004798	Ulk2	3'UTR	protein_coding	KNOWN	NA	NA
chr11	61777158	61777188	9816[gene=ENSMUSG00000004798][PH=7][PH0=0.01][P=5.3e-13]	7	-	3	ENSMUSG00000004798	Ulk2	3'UTR	protein_coding	KNOWN	NA	NA
chr11	61664916	61664946	11031[gene=ENSMUSG00000004837][PH=4][PH0=0.08][P=4.4e-03]	4	+	3	ENSMUSG00000004837	Grap	intron	protein_coding	KNOWN	NA	NA
chr16	65539462	65539492	7211[gene=ENSMUSG00000004843][PH=4][PH0=0.01][P=6.3e-06]	4	-	2	ENSMUSG00000004843	Chmp2b	3'UTR	protein_coding	KNOWN	NA	NA
chr5	136996483	136996513	14122[gene=ENSMUSG00000004846][PH=2][PH0=0.00][P=7.5e-03]	2	+	2	ENSMUSG00000004846	Plod3	3'UTR	protein_coding	KNOWN	NA	NA
chr5	137035352	137035382	13841[gene=ENSMUSG00000004849][PH=4][PH0=0.01][P=5.6e-07]	4	-	1	ENSMUSG00000004849	Ap1s1	3'UTR	protein_coding	KNOWN	NA	NA
chr17	28617981	28618011	3006[gene=ENSMUSG00000004865][PH=4][PH0=0.04][P=3.1e-04]	4	-	3	ENSMUSG00000004865	Srpk1	downstream 10K|intron	protein_coding	KNOWN	NA	NA
chr1	181816558	181816588	25855[gene=ENSMUSG00000004880][PH=4][PH0=0.06][P=2.1e-03]	4	-	3	ENSMUSG00000004880	Lbr	3'UTR	protein_coding	KNOWN	NA	NA
chr1	181816033	181816063	25824[gene=ENSMUSG00000004880][PH=4][PH0=0.06][P=2.1e-03]	4	-	2	ENSMUSG00000004880	Lbr	3'UTR	protein_coding	KNOWN	NA	NA
chr1	181816049	181816079	25827[gene=ENSMUSG00000004880][PH=5][PH0=0.06][P=3.3e-05]	5	-	3	ENSMUSG00000004880	Lbr	3'UTR	protein_coding	KNOWN	NA	NA
chr1	181815818	181815848	25806[gene=ENSMUSG00000004880][PH=4][PH0=0.06][P=2.1e-03]	4	-	2	ENSMUSG00000004880	Lbr	3'UTR	protein_coding	KNOWN	NA	NA
chr1	181816294	181816324	25841[gene=ENSMUSG00000004880][PH=4][PH0=0.06][P=2.1e-03]	4	-	2	ENSMUSG00000004880	Lbr	3'UTR	protein_coding	KNOWN	NA	NA
chr3	87915341	87915371	9330[gene=ENSMUSG00000004897][PH=4][PH0=0.07][P=2.1e-03]	4	+	2	ENSMUSG00000004897	Hdgf	3'UTR	protein_coding	KNOWN	NA	NA
chr3	87916085	87916115	9342[gene=ENSMUSG00000004897][PH=4][PH0=0.07][P=2.1e-03]	4	+	1	ENSMUSG00000004897	Hdgf	3'UTR	protein_coding	KNOWN	NA	NA
chr10	81153300	81153330	9821[gene=ENSMUSG00000004934][PH=14][PH0=0.03][P=1.0e-100]	14	-	3	ENSMUSG00000004934	Pias4	3'UTR	protein_coding	KNOWN	NA	NA
chr9	64186025	64186055	7572[gene=ENSMUSG00000004936][PH=5][PH0=0.01][P=5.1e-08]	5	-	2	ENSMUSG00000004936	Map2k1	3'UTR	protein_coding	KNOWN	NA	NA
chr6	51463047	51463077	5062[gene=ENSMUSG00000004980][PH=11][PH0=0.24][P=1.6e-11]	11	-	3	ENSMUSG00000004980	Hnrnpa2b1	3'UTR|intron	protein_coding	KNOWN	NA	NA
chr6	51463128	51463158	5077[gene=ENSMUSG00000004980][PH=8][PH0=0.24][P=8.3e-07]	8	-	3	ENSMUSG00000004980	Hnrnpa2b1	3'UTR|intron	protein_coding	KNOWN	NA	NA
chr8	84258344	84258374	5715[gene=ENSMUSG00000004994][PH=11][PH0=0.03][P=1.0e-100]	11	-	3	ENSMUSG00000004994	Ccdc130	3'UTR	protein_coding	KNOWN	NA	NA
chr3	146750493	146750523	13168[gene=ENSMUSG00000005034][PH=6][PH0=0.03][P=5.0e-09]	6	-	3	ENSMUSG00000005034	Prkacb	CDS	protein_coding	KNOWN	NA	NA
chr3	146730280	146730310	13109[gene=ENSMUSG00000005034][PH=6][PH0=0.03][P=5.0e-09]	6	-	3	ENSMUSG00000005034	Prkacb	3'UTR	protein_coding	KNOWN	NA	NA
chr10	78427567	78427597	9402[gene=ENSMUSG00000005054][PH=4][PH0=0.02][P=3.1e-06]	4	+	2	ENSMUSG00000005054	Cstb	3'UTR	protein_coding	KNOWN	NA	NA
chr12	72101345	72101375	5750[gene=ENSMUSG00000005078][PH=3][PH0=0.02][P=4.9e-03]	3	+	3	ENSMUSG00000005078	Jkamp	3'UTR	protein_coding	KNOWN	NA	NA
chr12	72101367	72101397	5752[gene=ENSMUSG00000005078][PH=3][PH0=0.02][P=4.9e-03]	3	+	2	ENSMUSG00000005078	Jkamp	3'UTR	protein_coding	KNOWN	NA	NA
chr12	72101324	72101354	5747[gene=ENSMUSG00000005078][PH=3][PH0=0.02][P=4.9e-03]	3	+	2	ENSMUSG00000005078	Jkamp	3'UTR	protein_coding	KNOWN	NA	NA
chr12	72101407	72101437	5756[gene=ENSMUSG00000005078][PH=3][PH0=0.02][P=4.9e-03]	3	+	2	ENSMUSG00000005078	Jkamp	3'UTR	protein_coding	KNOWN	NA	NA
chr2	102813519	102813549	12803[gene=ENSMUSG00000005087][PH=4][PH0=0.02][P=1.5e-04]	4	-	3	ENSMUSG00000005087	Cd44	3'UTR	protein_coding	KNOWN	NA	NA
chr2	102811450	102811480	12769[gene=ENSMUSG00000005087][PH=15][PH0=0.02][P=1.0e-100]	15	-	3	ENSMUSG00000005087	Cd44	3'UTR	protein_coding	KNOWN	NA	NA
chr5	38527612	38527642	3186[gene=ENSMUSG00000005103][PH=6][PH0=0.05][P=1.4e-07]	6	-	3	ENSMUSG00000005103	Wdr1	3'UTR	protein_coding	KNOWN	NA	NA
chr5	38526941	38526971	3164[gene=ENSMUSG00000005103][PH=6][PH0=0.05][P=1.4e-07]	6	-	3	ENSMUSG00000005103	Wdr1	3'UTR	protein_coding	KNOWN	NA	NA
chr15	66929328	66929358	7107[gene=ENSMUSG00000005125][PH=6][PH0=0.03][P=6.2e-09]	6	-	2	ENSMUSG00000005125	Ndrg1	3'UTR	protein_coding	KNOWN	NA	NA
chr11	69734006	69734036	11404[gene=ENSMUSG00000005198][PH=5][PH0=0.07][P=7.3e-05]	5	-	2	ENSMUSG00000005198	Polr2a	3'UTR	protein_coding	KNOWN	NA	NA
chr11	69734630	69734660	11419[gene=ENSMUSG00000005198][PH=4][PH0=0.07][P=4.0e-03]	4	-	1	ENSMUSG00000005198	Polr2a	CDS	protein_coding	KNOWN	NA	NA
chr11	69735036	69735066	11442[gene=ENSMUSG00000005198][PH=7][PH0=0.07][P=1.3e-08]	7	-	3	ENSMUSG00000005198	Polr2a	CDS	protein_coding	KNOWN	NA	NA
chr11	69758430	69758460	11515[gene=ENSMUSG00000005198][PH=4][PH0=0.07][P=4.0e-03]	4	-	2	ENSMUSG00000005198	Polr2a	5'UTR|downstream 10K	protein_coding	KNOWN	NA	NA
chr16	18834848	18834878	2069[gene=ENSMUSG00000005262][PH=4][PH0=0.03][P=2.0e-04]	4	+	3	ENSMUSG00000005262	Ufd1l	3'UTR	protein_coding	KNOWN	NA	NA
chr16	18834418	18834448	2058[gene=ENSMUSG00000005262][PH=5][PH0=0.03][P=1.7e-06]	5	+	3	ENSMUSG00000005262	Ufd1l	3'UTR	protein_coding	KNOWN	NA	NA
chr5	33742319	33742349	2756[gene=ENSMUSG00000005299][PH=5][PH0=0.02][P=7.7e-08]	5	-	3	ENSMUSG00000005299	Letm1	3'UTR	protein_coding	KNOWN	NA	NA
chr13	58176473	58176503	6223[gene=ENSMUSG00000005312][PH=9][PH0=0.14][P=7.1e-10]	9	-	3	ENSMUSG00000005312	Ubqln1	3'UTR	protein_coding	KNOWN	NA	NA
chr13	58177165	58177195	6241[gene=ENSMUSG00000005312][PH=5][PH0=0.14][P=2.8e-03]	5	-	3	ENSMUSG00000005312	Ubqln1	3'UTR	protein_coding	KNOWN	NA	NA
chr13	58177806	58177836	6362[gene=ENSMUSG00000005312][PH=31][PH0=0.14][P=1.0e-100]	31	-	3	ENSMUSG00000005312	Ubqln1	3'UTR	protein_coding	KNOWN	NA	NA
chr13	58177509	58177539	6287[gene=ENSMUSG00000005312][PH=71][PH0=0.14][P=1.0e-100]	71	-	3	ENSMUSG00000005312	Ubqln1	3'UTR	protein_coding	KNOWN	NA	NA
chr6	106778331	106778361	11727[gene=ENSMUSG00000005362][PH=6][PH0=0.04][P=3.1e-08]	6	-	2	ENSMUSG00000005362	Crbn	3'UTR	protein_coding	KNOWN	NA	NA
chr17	87991974	87992004	14146[gene=ENSMUSG00000005371][PH=5][PH0=0.11][P=1.3e-03]	5	-	3	ENSMUSG00000005371	Fbxo11	3'UTR	protein_coding	KNOWN	NA	NA
chr17	87991369	87991399	14109[gene=ENSMUSG00000005371][PH=20][PH0=0.11][P=1.0e-100]	20	-	3	ENSMUSG00000005371	Fbxo11	3'UTR	protein_coding	KNOWN	NA	NA
chr17	87990937	87990967	14079[gene=ENSMUSG00000005371][PH=6][PH0=0.11][P=2.9e-05]	6	-	3	ENSMUSG00000005371	Fbxo11	3'UTR	protein_coding	KNOWN	NA	NA
chr5	135054011	135054041	13195[gene=ENSMUSG00000005378][PH=9][PH0=0.03][P=1.0e-100]	9	-	3	ENSMUSG00000005378	Wbscr22	intron	protein_coding	KNOWN	NA	NA
chr11	59748276	59748306	10390[gene=ENSMUSG00000005417][PH=4][PH0=0.01][P=9.1e-07]	4	+	1	ENSMUSG00000005417	Mprip	intron	protein_coding	KNOWN	NA	NA
chr8	83995880	83995910	8549[gene=ENSMUSG00000005469][PH=3][PH0=0.03][P=7.2e-03]	3	+	2	ENSMUSG00000005469	Prkaca	3'UTR	protein_coding	KNOWN	NA	NA
chr2	91015335	91015365	12295[gene=ENSMUSG00000005506][PH=28][PH0=0.08][P=1.0e-100]	28	+	3	ENSMUSG00000005506	Celf1	3'UTR|intron	protein_coding	KNOWN	NA	NA
chr2	91013678	91013708	12238[gene=ENSMUSG00000005506][PH=8][PH0=0.08][P=1.1e-09]	8	+	3	ENSMUSG00000005506	Celf1	3'UTR|intron	protein_coding	KNOWN	NA	NA
chr5	135729418	135729448	14006[gene=ENSMUSG00000005514][PH=3][PH0=0.01][P=3.3e-04]	3	+	2	ENSMUSG00000005514	Por	CDS	protein_coding	KNOWN	NA	NA
chr5	135729445	135729475	14008[gene=ENSMUSG00000005514][PH=3][PH0=0.01][P=3.3e-04]	3	+	2	ENSMUSG00000005514	Por	CDS	protein_coding	KNOWN	NA	NA
chr7	67952846	67952876	4281[gene=ENSMUSG00000005533][PH=6][PH0=0.05][P=1.5e-06]	6	+	3	ENSMUSG00000005533	Igf1r	CDS	protein_coding	KNOWN	NA	NA
chr8	3153256	3153286	6[gene=ENSMUSG00000005534][PH=3][PH0=0.01][P=2.1e-03]	3	-	2	ENSMUSG00000005534	Insr	3'UTR	protein_coding	KNOWN	NA	NA
chr8	3153304	3153334	11[gene=ENSMUSG00000005534][PH=4][PH0=0.01][P=7.3e-06]	4	-	2	ENSMUSG00000005534	Insr	3'UTR	protein_coding	KNOWN	NA	NA
chr7	13025371	13025401	522[gene=ENSMUSG00000005566][PH=4][PH0=0.03][P=3.5e-05]	4	+	1	ENSMUSG00000005566	Trim28	CDS	protein_coding	KNOWN	NA	NA
chr7	13035531	13035561	351[gene=ENSMUSG00000005575][PH=9][PH0=0.06][P=3.9e-14]	9	-	3	ENSMUSG00000005575	Ube2m	3'UTR	protein_coding	KNOWN	NA	NA
chr7	111043116	111043146	9978[gene=ENSMUSG00000005609][PH=15][PH0=0.03][P=1.0e-100]	15	+	3	ENSMUSG00000005609	Ctr9	CDS	protein_coding	KNOWN	NA	NA
chr7	111072489	111072519	9623[gene=ENSMUSG00000005610][PH=13][PH0=2.36][P=7.6e-03]	13	-	3	ENSMUSG00000005610	Eif4g2	3'UTR	protein_coding	KNOWN	NA	NA
chr7	111072560	111072590	9653[gene=ENSMUSG00000005610][PH=41][PH0=2.36][P=7.5e-14]	41	-	3	ENSMUSG00000005610	Eif4g2	3'UTR	protein_coding	KNOWN	NA	NA
chr7	111081549	111081579	9984[gene=ENSMUSG00000005610][PH=57][PH0=2.36][P=7.5e-14]	57	-	3	ENSMUSG00000005610	Eif4g2	5'UTR	protein_coding	KNOWN	NA	NA
chr7	111076188	111076218	9880[gene=ENSMUSG00000005610][PH=17][PH0=2.36][P=5.7e-06]	17	-	3	ENSMUSG00000005610	Eif4g2	intron	protein_coding	KNOWN	NA	NA
chr7	111074392	111074422	9730[gene=ENSMUSG00000005610][PH=19][PH0=2.36][P=1.1e-07]	19	-	3	ENSMUSG00000005610	Eif4g2	CDS	protein_coding	KNOWN	NA	NA
chr7	111076067	111076097	9802[gene=ENSMUSG00000005610][PH=1272][PH0=2.36][P=7.5e-14]	1272	-	3	ENSMUSG00000005610	Eif4g2	intron	protein_coding	KNOWN	NA	NA
chr7	81037809	81037839	6643[gene=ENSMUSG00000005621][PH=14][PH0=0.03][P=1.0e-100]	14	+	3	ENSMUSG00000005621	Zfp592	CDS	protein_coding	KNOWN	NA	NA
chr7	81045130	81045160	6676[gene=ENSMUSG00000005621][PH=4][PH0=0.03][P=3.0e-04]	4	+	2	ENSMUSG00000005621	Zfp592	3'UTR	protein_coding	KNOWN	NA	NA
chr12	54746659	54746689	2682[gene=ENSMUSG00000005656][PH=3][PH0=0.01][P=1.5e-03]	3	-	2	ENSMUSG00000005656	Snx6	3'UTR	protein_coding	KNOWN	NA	NA
chr6	83306533	83306563	7038[gene=ENSMUSG00000005667][PH=139][PH0=0.43][P=1.0e-100]	139	-	3	ENSMUSG00000005667	Mthfd2	3'UTR	protein_coding	KNOWN	NA	NA
chr6	83306057	83306087	6955[gene=ENSMUSG00000005667][PH=12][PH0=0.43][P=3.6e-10]	12	-	3	ENSMUSG00000005667	Mthfd2	3'UTR	protein_coding	KNOWN	NA	NA
chr10	128362178	128362208	16166[gene=ENSMUSG00000005683][PH=7][PH0=0.03][P=4.4e-11]	7	+	2	ENSMUSG00000005683	Cs	3'UTR	protein_coding	KNOWN	NA	NA
chr8	105682193	105682223	11189[gene=ENSMUSG00000005698][PH=5][PH0=0.05][P=1.5e-05]	5	+	2	ENSMUSG00000005698	Ctcf	3'UTR	protein_coding	KNOWN	NA	NA
chr8	105682812	105682842	11224[gene=ENSMUSG00000005698][PH=6][PH0=0.05][P=1.5e-07]	6	+	3	ENSMUSG00000005698	Ctcf	3'UTR	protein_coding	KNOWN	NA	NA
chr8	105682239	105682269	11196[gene=ENSMUSG00000005698][PH=4][PH0=0.05][P=1.3e-03]	4	+	2	ENSMUSG00000005698	Ctcf	3'UTR	protein_coding	KNOWN	NA	NA
chr8	105681712	105681742	11176[gene=ENSMUSG00000005698][PH=5][PH0=0.05][P=1.5e-05]	5	+	2	ENSMUSG00000005698	Ctcf	3'UTR	protein_coding	KNOWN	NA	NA
chr8	105682580	105682610	11207[gene=ENSMUSG00000005698][PH=8][PH0=0.05][P=8.1e-12]	8	+	3	ENSMUSG00000005698	Ctcf	3'UTR	protein_coding	KNOWN	NA	NA
chr16	4544732	4544762	415[gene=ENSMUSG00000005718][PH=5][PH0=0.02][P=7.3e-08]	5	-	2	ENSMUSG00000005718	Tfap4	3'UTR	protein_coding	KNOWN	NA	NA
chr16	18240732	18240762	2219[gene=ENSMUSG00000005732][PH=4][PH0=0.03][P=1.0e-04]	4	-	2	ENSMUSG00000005732	Ranbp1	intron	protein_coding	KNOWN	NA	NA
chr1	165861773	165861803	17008[gene=ENSMUSG00000005763][PH=5][PH0=0.13][P=4.1e-03]	5	+	3	ENSMUSG00000005763	Cd247	3'UTR|intron	protein_coding	KNOWN	NA	NA
chr1	165862031	165862061	17038[gene=ENSMUSG00000005763][PH=69][PH0=0.13][P=1.0e-100]	69	+	3	ENSMUSG00000005763	Cd247	3'UTR|intron	protein_coding	KNOWN	NA	NA
chr1	165861540	165861570	16996[gene=ENSMUSG00000005763][PH=5][PH0=0.13][P=4.1e-03]	5	+	3	ENSMUSG00000005763	Cd247	3'UTR|intron	protein_coding	KNOWN	NA	NA
chr3	138459010	138459040	12143[gene=ENSMUSG00000005813][PH=6][PH0=0.04][P=5.6e-08]	6	-	3	ENSMUSG00000005813	Metap1	3'UTR	protein_coding	KNOWN	NA	NA
chr3	138458968	138458998	12135[gene=ENSMUSG00000005813][PH=4][PH0=0.04][P=6.0e-04]	4	-	3	ENSMUSG00000005813	Metap1	3'UTR	protein_coding	KNOWN	NA	NA
chr3	138459865	138459895	12160[gene=ENSMUSG00000005813][PH=4][PH0=0.04][P=6.0e-04]	4	-	2	ENSMUSG00000005813	Metap1	3'UTR	protein_coding	KNOWN	NA	NA
chr16	11193307	11193337	1173[gene=ENSMUSG00000005846][PH=4][PH0=0.09][P=5.6e-03]	4	-	2	ENSMUSG00000005846	Rsl1d1	3'UTR	protein_coding	KNOWN	NA	NA
chr16	11202406	11202436	1218[gene=ENSMUSG00000005846][PH=4][PH0=0.09][P=5.6e-03]	4	-	3	ENSMUSG00000005846	Rsl1d1	CDS	protein_coding	KNOWN	NA	NA
chr16	11202330	11202360	1209[gene=ENSMUSG00000005846][PH=5][PH0=0.09][P=1.3e-04]	5	-	3	ENSMUSG00000005846	Rsl1d1	CDS	protein_coding	KNOWN	NA	NA
chr16	11193265	11193295	1161[gene=ENSMUSG00000005846][PH=16][PH0=0.09][P=1.0e-100]	16	-	3	ENSMUSG00000005846	Rsl1d1	3'UTR	protein_coding	KNOWN	NA	NA
chr2	155846919	155846949	18966[gene=ENSMUSG00000005882][PH=13][PH0=0.01][P=1.0e-100]	13	-	3	ENSMUSG00000005882	Uqcc1	3'UTR	protein_coding	KNOWN	NA	NA
chr1	13140945	13140975	681[gene=ENSMUSG00000005886][PH=17][PH0=0.04][P=7.3e-13]	17	-	3	ENSMUSG00000005886	Ncoa2	3'UTR	protein_coding	KNOWN	NA	NA
chr1	13174734	13174764	770[gene=ENSMUSG00000005886][PH=5][PH0=0.04][P=3.7e-05]	5	-	2	ENSMUSG00000005886	Ncoa2	CDS	protein_coding	KNOWN	NA	NA
chr6	92169531	92169561	8945[gene=ENSMUSG00000005893][PH=14][PH0=0.03][P=2.7e-13]	14	+	3	ENSMUSG00000005893	Nr2c2	3'UTR	protein_coding	KNOWN	NA	NA
chr1	150449787	150449817	13562[gene=ENSMUSG00000006005][PH=11][PH0=0.05][P=1.0e-100]	11	+	3	ENSMUSG00000006005	Tpr	3'UTR	protein_coding	KNOWN	NA	NA
chr1	150410051	150410081	13454[gene=ENSMUSG00000006005][PH=6][PH0=0.05][P=3.4e-07]	6	+	3	ENSMUSG00000006005	Tpr	CDS	protein_coding	KNOWN	NA	NA
chr1	150403596	150403626	13436[gene=ENSMUSG00000006005][PH=6][PH0=0.05][P=3.4e-07]	6	+	2	ENSMUSG00000006005	Tpr	CDS	protein_coding	KNOWN	NA	NA
chr1	150449896	150449926	13580[gene=ENSMUSG00000006005][PH=5][PH0=0.05][P=3.1e-05]	5	+	2	ENSMUSG00000006005	Tpr	3'UTR	protein_coding	KNOWN	NA	NA
chr7	16116736	16116766	594[gene=ENSMUSG00000006024][PH=25][PH0=0.04][P=1.0e-100]	25	+	3	ENSMUSG00000006024	Napa	3'UTR	protein_coding	KNOWN	NA	NA
chr16	17485139	17485169	1887[gene=ENSMUSG00000006134][PH=10][PH0=0.05][P=1.0e-100]	10	+	3	ENSMUSG00000006134	Crkl	3'UTR	protein_coding	KNOWN	NA	NA
chr11	45909743	45909773	7044[gene=ENSMUSG00000006169][PH=8][PH0=0.11][P=5.9e-09]	8	+	3	ENSMUSG00000006169	Clint1	3'UTR	protein_coding	KNOWN	NA	NA
chr11	45910179	45910209	7062[gene=ENSMUSG00000006169][PH=5][PH0=0.11][P=9.8e-04]	5	+	2	ENSMUSG00000006169	Clint1	3'UTR	protein_coding	KNOWN	NA	NA
chr11	45910304	45910334	7090[gene=ENSMUSG00000006169][PH=24][PH0=0.11][P=2.1e-13]	24	+	3	ENSMUSG00000006169	Clint1	3'UTR	protein_coding	KNOWN	NA	NA
chr13	29827856	29827886	1970[gene=ENSMUSG00000006191][PH=3][PH0=0.01][P=3.1e-03]	3	-	1	ENSMUSG00000006191	Cdkal1	downstream 10K|intron	protein_coding	KNOWN	NA	NA
chr4	141467152	141467182	19111[gene=ENSMUSG00000006215][PH=4][PH0=0.03][P=6.3e-05]	4	+	3	ENSMUSG00000006215	Zbtb17	3'UTR	protein_coding	KNOWN	NA	NA
chr5	88760131	88760161	7413[gene=ENSMUSG00000006262][PH=5][PH0=0.05][P=1.5e-05]	5	+	3	ENSMUSG00000006262	Mob1b	3'UTR	protein_coding	KNOWN	NA	NA
chr5	88756442	88756472	7355[gene=ENSMUSG00000006262][PH=9][PH0=0.05][P=1.0e-100]	9	+	3	ENSMUSG00000006262	Mob1b	3'UTR	protein_coding	KNOWN	NA	NA
chr5	88756892	88756922	7376[gene=ENSMUSG00000006262][PH=6][PH0=0.05][P=1.4e-07]	6	+	3	ENSMUSG00000006262	Mob1b	3'UTR	protein_coding	KNOWN	NA	NA
chr8	69112696	69112726	4093[gene=ENSMUSG00000006273][PH=3][PH0=0.02][P=6.6e-03]	3	+	2	ENSMUSG00000006273	Atp6v1b2	3'UTR	protein_coding	KNOWN	NA	NA
chr8	69112820	69112850	4100[gene=ENSMUSG00000006273][PH=4][PH0=0.02][P=5.4e-05]	4	+	3	ENSMUSG00000006273	Atp6v1b2	3'UTR	protein_coding	KNOWN	NA	NA
chr1	74268072	74268102	6407[gene=ENSMUSG00000006304][PH=5][PH0=0.07][P=6.1e-05]	5	+	2	ENSMUSG00000006304	Arpc2	3'UTR	protein_coding	KNOWN	NA	NA
chr1	74267923	74267953	6396[gene=ENSMUSG00000006304][PH=4][PH0=0.07][P=3.6e-03]	4	+	2	ENSMUSG00000006304	Arpc2	3'UTR	protein_coding	KNOWN	NA	NA
chr1	74236832	74236862	6280[gene=ENSMUSG00000006304][PH=4][PH0=0.07][P=3.6e-03]	4	+	2	ENSMUSG00000006304	Arpc2	5'UTR|CDS	protein_coding	KNOWN	NA	NA
chr1	74248147	74248177	6328[gene=ENSMUSG00000006304][PH=4][PH0=0.07][P=3.6e-03]	4	+	3	ENSMUSG00000006304	Arpc2	CDS	protein_coding	KNOWN	NA	NA
chr4	118414861	118414891	13900[gene=ENSMUSG00000006392][PH=4][PH0=0.03][P=5.3e-05]	4	+	3	ENSMUSG00000006392	Med8	3'UTR	protein_coding	KNOWN	NA	NA
chr1	171358084	171358114	17263[gene=ENSMUSG00000006412][PH=6][PH0=0.04][P=3.7e-08]	6	+	3	ENSMUSG00000006412	Pfdn2	3'UTR	protein_coding	KNOWN	NA	NA
chr2	167516100	167516130	23249[gene=ENSMUSG00000006418][PH=3][PH0=0.02][P=2.9e-03]	3	+	3	ENSMUSG00000006418	Rnf114	3'UTR	protein_coding	KNOWN	NA	NA
chr2	71883426	71883456	10383[gene=ENSMUSG00000006494][PH=6][PH0=0.02][P=3.3e-10]	6	+	3	ENSMUSG00000006494	Pdk1	CDS	protein_coding	KNOWN	NA	NA
chr14	30819186	30819216	4118[gene=ENSMUSG00000006527][PH=19][PH0=0.03][P=3.5e-13]	19	+	3	ENSMUSG00000006527	Sfmbt1	3'UTR	protein_coding	KNOWN	NA	NA
chr14	30819376	30819406	4145[gene=ENSMUSG00000006527][PH=13][PH0=0.03][P=3.5e-13]	13	+	3	ENSMUSG00000006527	Sfmbt1	3'UTR	protein_coding	KNOWN	NA	NA
chr8	122573102	122573132	14210[gene=ENSMUSG00000006585][PH=2][PH0=0.00][P=9.7e-03]	2	+	1	ENSMUSG00000006585	Cdt1	3'UTR|intron	protein_coding	KNOWN	NA	NA
chr7	46808618	46808648	3053[gene=ENSMUSG00000006599][PH=3][PH0=0.02][P=5.7e-03]	3	+	2	ENSMUSG00000006599	Gtf2h1	3'UTR|CDS	protein_coding	KNOWN	NA	NA
chr9	108560120	108560150	14903[gene=ENSMUSG00000006673][PH=12][PH0=0.07][P=1.0e-100]	12	+	3	ENSMUSG00000006673	Qrich1	3'UTR	protein_coding	KNOWN	NA	NA
chr9	108559853	108559883	14878[gene=ENSMUSG00000006673][PH=7][PH0=0.07][P=9.1e-09]	7	+	2	ENSMUSG00000006673	Qrich1	3'UTR	protein_coding	KNOWN	NA	NA
chr9	108502279	108502309	14775[gene=ENSMUSG00000006676][PH=4][PH0=0.05][P=4.8e-04]	4	+	2	ENSMUSG00000006676	Usp19	3'UTR	protein_coding	KNOWN	NA	NA
chr9	108496926	108496956	14751[gene=ENSMUSG00000052911][PH=8][PH0=0.03][P=1.0e-100]	8	+	3	ENSMUSG00000006676	Usp19	CDS|downstream 10K	protein_coding	KNOWN	NA	NA
chr4	137320831	137320861	12835[gene=ENSMUSG00000006699][PH=5][PH0=0.06][P=2.9e-05]	5	-	3	ENSMUSG00000006699	Cdc42	3'UTR	protein_coding	KNOWN	NA	NA
chr4	137320574	137320604	12823[gene=ENSMUSG00000006699][PH=7][PH0=0.06][P=3.1e-09]	7	-	3	ENSMUSG00000006699	Cdc42	3'UTR	protein_coding	KNOWN	NA	NA
chr17	31606485	31606515	5015[gene=ENSMUSG00000006705][PH=3][PH0=0.02][P=3.7e-03]	3	+	2	ENSMUSG00000006705	Pknox1	3'UTR	protein_coding	KNOWN	NA	NA
chr10	127067134	127067164	15307[gene=ENSMUSG00000006728][PH=10][PH0=0.06][P=1.0e-100]	10	+	3	ENSMUSG00000006728	Cdk4	3'UTR	protein_coding	KNOWN	NA	NA
chr10	127067252	127067282	15318[gene=ENSMUSG00000006728][PH=5][PH0=0.06][P=1.4e-05]	5	+	3	ENSMUSG00000006728	Cdk4	3'UTR	protein_coding	KNOWN	NA	NA
chr10	127171440	127171470	15454[gene=ENSMUSG00000006731][PH=8][PH0=0.14][P=1.2e-08]	8	+	3	ENSMUSG00000006731	B4galnt1	intron	protein_coding	KNOWN	NA	NA
chr18	6201501	6201531	418[gene=ENSMUSG00000006740][PH=6][PH0=0.05][P=1.2e-07]	6	-	3	ENSMUSG00000006740	Kif5b	3'UTR	protein_coding	KNOWN	NA	NA
chr17	13015314	13015344	1247[gene=ENSMUSG00000006818][PH=9][PH0=0.04][P=1.0e-100]	9	+	3	ENSMUSG00000006818	Sod2	3'UTR	protein_coding	KNOWN	NA	NA
chr17	13009022	13009052	1231[gene=ENSMUSG00000006818][PH=4][PH0=0.04][P=2.7e-04]	4	+	1	ENSMUSG00000006818	Sod2	intron	protein_coding	KNOWN	NA	NA
chr9	120960099	120960129	16918[gene=ENSMUSG00000006932][PH=10][PH0=0.06][P=1.0e-100]	10	+	3	ENSMUSG00000006932	Ctnnb1	3'UTR	protein_coding	KNOWN	NA	NA
chr9	120960325	120960355	16949[gene=ENSMUSG00000006932][PH=4][PH0=0.06][P=2.7e-03]	4	+	3	ENSMUSG00000006932	Ctnnb1	3'UTR	protein_coding	KNOWN	NA	NA
chr9	120495262	120495292	16812[gene=ENSMUSG00000006941][PH=6][PH0=0.02][P=2.0e-10]	6	+	3	ENSMUSG00000006941	Eif1b	3'UTR	protein_coding	KNOWN	NA	NA
chr17	34935291	34935321	5534[gene=ENSMUSG00000007034][PH=3][PH0=0.01][P=2.2e-04]	3	+	2	ENSMUSG00000007038	Neu1	3'UTR	protein_coding	KNOWN	NA	NA
chr17	35058686	35058716	5613[gene=ENSMUSG00000096022][PH=12][PH0=0.09][P=1.0e-100]	12	+	3	ENSMUSG00000007041	Clic1	3'UTR	protein_coding	KNOWN	NA	NA
chr17	34985674	34985704	5552[gene=ENSMUSG00000007033][PH=5][PH0=0.01][P=8.0e-09]	5	+	1	ENSMUSG00000007050	Lsm2	3'UTR	protein_coding	KNOWN	NA	NA
chr12	111655682	111655712	12246[gene=ENSMUSG00000007411][PH=5][PH0=0.02][P=2.5e-07]	5	+	3	ENSMUSG00000007411	Mark3	3'UTR	protein_coding	KNOWN	NA	NA
chr5	3641254	3641284	76[gene=ENSMUSG00000007415][PH=6][PH0=0.05][P=1.2e-07]	6	-	2	ENSMUSG00000007415	Gatad1	3'UTR|intron	protein_coding	KNOWN	NA	NA
chr5	3641395	3641425	83[gene=ENSMUSG00000007415][PH=4][PH0=0.05][P=8.6e-04]	4	-	2	ENSMUSG00000007415	Gatad1	CDS|downstream 10K	protein_coding	KNOWN	NA	NA
chr5	3640858	3640888	57[gene=ENSMUSG00000007415][PH=8][PH0=0.05][P=8.4e-12]	8	-	3	ENSMUSG00000007415	Gatad1	3'UTR|intron	protein_coding	KNOWN	NA	NA
chr6	122317568	122317598	11277[gene=ENSMUSG00000007458][PH=10][PH0=0.09][P=5.7e-14]	10	+	3	ENSMUSG00000007458	M6pr	3'UTR	protein_coding	KNOWN	NA	NA
chr2	30262453	30262483	4793[gene=ENSMUSG00000007476][PH=7][PH0=0.01][P=1.1e-13]	7	+	3	ENSMUSG00000007476	Lrrc8a	3'UTR|intron	protein_coding	KNOWN	NA	NA
chr17	20965868	20965898	2118[gene=ENSMUSG00000007564][PH=6][PH0=0.01][P=6.4e-11]	6	+	3	ENSMUSG00000007564	Ppp2r1a	3'UTR	protein_coding	KNOWN	NA	NA
chr4	47414810	47414840	8187[gene=ENSMUSG00000007613][PH=4][PH0=0.05][P=1.8e-03]	4	+	2	ENSMUSG00000007613	Tgfbr1	3'UTR	protein_coding	KNOWN	NA	NA
chr4	47411680	47411710	8131[gene=ENSMUSG00000007613][PH=6][PH0=0.05][P=2.1e-07]	6	+	3	ENSMUSG00000007613	Tgfbr1	3'UTR	protein_coding	KNOWN	NA	NA
chr4	47393454	47393484	8097[gene=ENSMUSG00000007613][PH=11][PH0=0.05][P=2.1e-13]	11	+	3	ENSMUSG00000007613	Tgfbr1	CDS	protein_coding	KNOWN	NA	NA
chr13	93402619	93402649	10010[gene=ENSMUSG00000007617][PH=5][PH0=0.03][P=2.0e-06]	5	+	2	ENSMUSG00000007617	Homer1	3'UTR	protein_coding	KNOWN	NA	NA
chr9	75056639	75056669	11734[gene=ENSMUSG00000007656][PH=5][PH0=0.05][P=8.5e-06]	5	+	3	ENSMUSG00000007656	Arpp19	5'UTR|CDS	protein_coding	KNOWN	NA	NA
chr9	75058667	75058697	11761[gene=ENSMUSG00000007656][PH=4][PH0=0.05][P=7.1e-04]	4	+	3	ENSMUSG00000007656	Arpp19	3'UTR	protein_coding	KNOWN	NA	NA
chr2	152780882	152780912	18172[gene=ENSMUSG00000007659][PH=11][PH0=0.11][P=1.0e-100]	11	-	3	ENSMUSG00000007659	Bcl2l1	3'UTR	protein_coding	KNOWN	NA	NA
chr2	152829964	152829994	18451[gene=ENSMUSG00000007659][PH=5][PH0=0.11][P=7.8e-04]	5	-	3	ENSMUSG00000007659	Bcl2l1	CDS	protein_coding	KNOWN	NA	NA
chr5	145245772	145245802	15492[gene=ENSMUSG00000007812][PH=5][PH0=0.06][P=2.0e-05]	5	+	2	ENSMUSG00000007812	Zfp655	3'UTR	protein_coding	KNOWN	NA	NA
chr9	108337530	108337560	14652[gene=ENSMUSG00000007815][PH=7][PH0=0.03][P=2.3e-11]	7	+	2	ENSMUSG00000007815	Rhoa	3'UTR	protein_coding	KNOWN	NA	NA
chr14	25666567	25666597	2608[gene=ENSMUSG00000007817][PH=5][PH0=0.01][P=7.7e-08]	5	+	2	ENSMUSG00000007817	Zmiz1	3'UTR	protein_coding	KNOWN	NA	NA
chr13	58127081	58127111	6136[gene=ENSMUSG00000007836][PH=10][PH0=0.41][P=7.5e-08]	10	-	3	ENSMUSG00000007836	Hnrnpa0	3'UTR	protein_coding	KNOWN	NA	NA
chr13	58126993	58127023	6120[gene=ENSMUSG00000007836][PH=8][PH0=0.41][P=3.2e-05]	8	-	3	ENSMUSG00000007836	Hnrnpa0	3'UTR	protein_coding	KNOWN	NA	NA
chr13	58126911	58126941	6102[gene=ENSMUSG00000007836][PH=13][PH0=0.41][P=3.8e-12]	13	-	3	ENSMUSG00000007836	Hnrnpa0	3'UTR	protein_coding	KNOWN	NA	NA
chr13	58127152	58127182	6167[gene=ENSMUSG00000007836][PH=64][PH0=0.41][P=1.0e-100]	64	-	3	ENSMUSG00000007836	Hnrnpa0	3'UTR	protein_coding	KNOWN	NA	NA
chr13	58126408	58126438	6067[gene=ENSMUSG00000007836][PH=11][PH0=0.41][P=3.1e-09]	11	-	3	ENSMUSG00000007836	Hnrnpa0	3'UTR	protein_coding	KNOWN	NA	NA
chr13	58126732	58126762	6085[gene=ENSMUSG00000007836][PH=6][PH0=0.41][P=8.0e-03]	6	-	3	ENSMUSG00000007836	Hnrnpa0	3'UTR	protein_coding	KNOWN	NA	NA
chr11	50381544	50381574	7742[gene=ENSMUSG00000007850][PH=4][PH0=0.09][P=6.3e-03]	4	+	2	ENSMUSG00000007850	Hnrnph1	CDS|intron	protein_coding	KNOWN	NA	NA
chr11	50386360	50386390	7801[gene=ENSMUSG00000007850][PH=4][PH0=0.09][P=6.3e-03]	4	+	3	ENSMUSG00000007850	Hnrnph1	3'UTR	protein_coding	KNOWN	NA	NA
chr4	133679945	133679975	11713[gene=ENSMUSG00000007880][PH=5][PH0=0.06][P=5.2e-05]	5	-	3	ENSMUSG00000007880	Arid1a	3'UTR	protein_coding	KNOWN	NA	NA
chr4	133679965	133679995	11717[gene=ENSMUSG00000007880][PH=4][PH0=0.06][P=3.7e-03]	4	-	2	ENSMUSG00000007880	Arid1a	3'UTR	protein_coding	KNOWN	NA	NA
chr4	133679483	133679513	11698[gene=ENSMUSG00000007880][PH=4][PH0=0.06][P=3.7e-03]	4	-	3	ENSMUSG00000007880	Arid1a	3'UTR	protein_coding	KNOWN	NA	NA
chr4	133681057	133681087	11743[gene=ENSMUSG00000007880][PH=4][PH0=0.06][P=3.7e-03]	4	-	3	ENSMUSG00000007880	Arid1a	CDS	protein_coding	KNOWN	NA	NA
chr4	133680089	133680119	11727[gene=ENSMUSG00000007880][PH=6][PH0=0.06][P=5.8e-07]	6	-	3	ENSMUSG00000007880	Arid1a	3'UTR	protein_coding	KNOWN	NA	NA
chrX	10719642	10719672	242[gene=ENSMUSG00000008035][PH=6][PH0=0.03][P=8.3e-10]	6	+	3	ENSMUSG00000008035	Mid1ip1	3'UTR	protein_coding	KNOWN	NA	NA
chr2	90780338	90780368	11994[gene=ENSMUSG00000008200][PH=5][PH0=0.04][P=4.0e-06]	5	+	3	ENSMUSG00000008200	Fnbp4	3'UTR	protein_coding	KNOWN	NA	NA
chr2	73317945	73317975	10476[gene=ENSMUSG00000008226][PH=3][PH0=0.00][P=3.5e-05]	3	+	1	ENSMUSG00000008226	Scrn3	intron	protein_coding	KNOWN	NA	NA
chr18	56575792	56575822	8165[gene=ENSMUSG00000008301][PH=5][PH0=0.01][P=1.9e-08]	5	+	3	ENSMUSG00000008301	Phax	CDS	protein_coding	KNOWN	NA	NA
chr2	143071615	143071645	18397[gene=ENSMUSG00000008333][PH=7][PH0=0.04][P=1.0e-10]	7	+	3	ENSMUSG00000008333	Snrpb2	3'UTR	protein_coding	KNOWN	NA	NA
chr5	125385990	125386020	12609[gene=ENSMUSG00000008348][PH=10][PH0=0.06][P=4.3e-14]	10	-	3	ENSMUSG00000008348	Ubc	3'UTR	protein_coding	KNOWN	NA	NA
chr16	8660190	8660220	721[gene=ENSMUSG00000008393][PH=2][PH0=0.00][P=6.2e-03]	2	-	2	ENSMUSG00000008393	Carhsp1	3'UTR	protein_coding	KNOWN	NA	NA
chr9	25108677	25108707	1446[gene=ENSMUSG00000008429][PH=5][PH0=0.03][P=2.6e-06]	5	-	2	ENSMUSG00000008429	Herpud2	3'UTR	protein_coding	KNOWN	NA	NA
chr9	25108633	25108663	1440[gene=ENSMUSG00000008429][PH=4][PH0=0.03][P=3.0e-04]	4	-	2	ENSMUSG00000008429	Herpud2	3'UTR	protein_coding	KNOWN	NA	NA
chr7	4426937	4426967	50[gene=ENSMUSG00000008435][PH=4][PH0=0.01][P=5.9e-06]	4	-	2	ENSMUSG00000008435	Rdh13	3'UTR|intron	protein_coding	KNOWN	NA	NA
chr1	152774291	152774321	14147[gene=ENSMUSG00000008475][PH=6][PH0=0.14][P=3.2e-05]	6	+	2	ENSMUSG00000008475	Arpc5	CDS	protein_coding	KNOWN	NA	NA
chr1	152774584	152774614	14167[gene=ENSMUSG00000008475][PH=8][PH0=0.14][P=1.6e-08]	8	+	3	ENSMUSG00000008475	Arpc5	3'UTR	protein_coding	KNOWN	NA	NA
chr1	152774789	152774819	14195[gene=ENSMUSG00000008475][PH=16][PH0=0.14][P=5.7e-14]	16	+	3	ENSMUSG00000008475	Arpc5	3'UTR	protein_coding	KNOWN	NA	NA
chr1	152771471	152771501	14128[gene=ENSMUSG00000008475][PH=11][PH0=0.14][P=1.1e-13]	11	+	3	ENSMUSG00000008475	Arpc5	CDS|intron	protein_coding	KNOWN	NA	NA
chr1	152767183	152767213	14092[gene=ENSMUSG00000055547][PH=2][PH0=0.00][P=8.6e-03]	2	+	2	ENSMUSG00000008475	Arpc5	downstream 10K|intron	protein_coding	KNOWN	NA	NA
chr1	152774646	152774676	14178[gene=ENSMUSG00000008475][PH=6][PH0=0.14][P=3.2e-05]	6	+	2	ENSMUSG00000008475	Arpc5	3'UTR	protein_coding	KNOWN	NA	NA
chr17	33954775	33954805	4816[gene=ENSMUSG00000008668][PH=3][PH0=0.03][P=3.4e-03]	3	-	1	ENSMUSG00000008668	Rps18	intron	protein_coding	KNOWN	NA	NA
chr7	118109083	118109113	10621[gene=ENSMUSG00000008683][PH=6][PH0=0.04][P=1.7e-08]	6	-	2	ENSMUSG00000008683	Rps15a	3'UTR|CDS	protein_coding	KNOWN	NA	NA
chr3	103742921	103742951	6950[gene=ENSMUSG00000008730][PH=7][PH0=0.07][P=1.3e-08]	7	-	2	ENSMUSG00000008730	Hipk1	3'UTR	protein_coding	KNOWN	NA	NA
chr3	103741557	103741587	6887[gene=ENSMUSG00000008730][PH=7][PH0=0.07][P=1.3e-08]	7	-	2	ENSMUSG00000008730	Hipk1	3'UTR	protein_coding	KNOWN	NA	NA
chr3	103739838	103739868	6828[gene=ENSMUSG00000008730][PH=4][PH0=0.07][P=5.0e-03]	4	-	2	ENSMUSG00000008730	Hipk1	3'UTR	protein_coding	KNOWN	NA	NA
chr3	103739962	103739992	6837[gene=ENSMUSG00000008730][PH=5][PH0=0.07][P=8.5e-05]	5	-	3	ENSMUSG00000008730	Hipk1	3'UTR	protein_coding	KNOWN	NA	NA
chr3	103742604	103742634	6924[gene=ENSMUSG00000008730][PH=5][PH0=0.07][P=8.5e-05]	5	-	3	ENSMUSG00000008730	Hipk1	3'UTR	protein_coding	KNOWN	NA	NA
chr3	103742758	103742788	6934[gene=ENSMUSG00000008730][PH=7][PH0=0.07][P=1.3e-08]	7	-	3	ENSMUSG00000008730	Hipk1	3'UTR	protein_coding	KNOWN	NA	NA
chr3	103743165	103743195	6975[gene=ENSMUSG00000008730][PH=8][PH0=0.07][P=1.2e-10]	8	-	3	ENSMUSG00000008730	Hipk1	3'UTR	protein_coding	KNOWN	NA	NA
chr3	103742978	103743008	6963[gene=ENSMUSG00000008730][PH=6][PH0=0.07][P=1.1e-06]	6	-	2	ENSMUSG00000008730	Hipk1	3'UTR	protein_coding	KNOWN	NA	NA
chr13	17882293	17882323	1154[gene=ENSMUSG00000008859][PH=3][PH0=0.01][P=1.9e-03]	3	-	1	ENSMUSG00000008859	Rala	3'UTR	protein_coding	KNOWN	NA	NA
chr16	84861271	84861301	11634[gene=ENSMUSG00000008976][PH=4][PH0=0.05][P=9.2e-04]	4	+	3	ENSMUSG00000008976	Gabpa	3'UTR|intron	protein_coding	KNOWN	NA	NA
chr16	84860684	84860714	11601[gene=ENSMUSG00000008976][PH=4][PH0=0.05][P=9.2e-04]	4	+	3	ENSMUSG00000008976	Gabpa	3'UTR|intron	protein_coding	KNOWN	NA	NA
chr16	84861125	84861155	11620[gene=ENSMUSG00000008976][PH=9][PH0=0.05][P=1.2e-13]	9	+	2	ENSMUSG00000008976	Gabpa	3'UTR|intron	protein_coding	KNOWN	NA	NA
chr2	37350792	37350822	5674[gene=ENSMUSG00000009030][PH=6][PH0=0.04][P=1.8e-08]	6	-	3	ENSMUSG00000009030	Pdcl	3'UTR	protein_coding	KNOWN	NA	NA
chr15	79360868	79360898	9343[gene=ENSMUSG00000009035][PH=3][PH0=0.02][P=5.9e-03]	3	-	2	ENSMUSG00000009035	Tmem184b	3'UTR	protein_coding	KNOWN	NA	NA
chr15	79362515	79362545	9364[gene=ENSMUSG00000009035][PH=18][PH0=0.02][P=1.0e-100]	18	-	3	ENSMUSG00000009035	Tmem184b	3'UTR	protein_coding	KNOWN	NA	NA
chr10	77598326	77598356	9339[gene=ENSMUSG00000009291][PH=3][PH0=0.02][P=3.7e-03]	3	+	2	ENSMUSG00000009291	Pttg1ip	3'UTR	protein_coding	KNOWN	NA	NA
chr10	77645937	77645967	9379[gene=ENSMUSG00000020265][PH=3][PH0=0.01][P=1.1e-03]	3	+	2	ENSMUSG00000009293	Ube2g2	3'UTR	protein_coding	KNOWN	NA	NA
chr10	77645904	77645934	9376[gene=ENSMUSG00000020265][PH=4][PH0=0.01][P=4.5e-06]	4	+	3	ENSMUSG00000009293	Ube2g2	3'UTR	protein_coding	KNOWN	NA	NA
chrX	20935168	20935198	919[gene=ENSMUSG00000009406][PH=4][PH0=0.02][P=4.3e-05]	4	-	3	ENSMUSG00000009406	Elk1	3'UTR	protein_coding	KNOWN	NA	NA
chr13	98841833	98841863	9669[gene=ENSMUSG00000009470][PH=12][PH0=0.10][P=5.8e-13]	12	-	3	ENSMUSG00000009470	Tnpo1	3'UTR	protein_coding	KNOWN	NA	NA
chr13	98843546	98843576	9838[gene=ENSMUSG00000009470][PH=5][PH0=0.10][P=7.8e-04]	5	-	3	ENSMUSG00000009470	Tnpo1	3'UTR	protein_coding	KNOWN	NA	NA
chr13	98843231	98843261	9815[gene=ENSMUSG00000009470][PH=23][PH0=0.10][P=5.8e-13]	23	-	3	ENSMUSG00000009470	Tnpo1	3'UTR	protein_coding	KNOWN	NA	NA
chr13	98841925	98841955	9699[gene=ENSMUSG00000009470][PH=40][PH0=0.10][P=5.8e-13]	40	-	3	ENSMUSG00000009470	Tnpo1	3'UTR	protein_coding	KNOWN	NA	NA
chr13	98840579	98840609	9593[gene=ENSMUSG00000009470][PH=7][PH0=0.10][P=2.4e-07]	7	-	3	ENSMUSG00000009470	Tnpo1	3'UTR	protein_coding	KNOWN	NA	NA
chr13	98842759	98842789	9756[gene=ENSMUSG00000009470][PH=8][PH0=0.10][P=3.3e-09]	8	-	3	ENSMUSG00000009470	Tnpo1	3'UTR	protein_coding	KNOWN	NA	NA
chr13	98843004	98843034	9779[gene=ENSMUSG00000009470][PH=7][PH0=0.10][P=2.4e-07]	7	-	3	ENSMUSG00000009470	Tnpo1	3'UTR	protein_coding	KNOWN	NA	NA
chr2	118475921	118475951	14550[gene=ENSMUSG00000009549][PH=39][PH0=0.17][P=1.0e-100]	39	-	3	ENSMUSG00000009549	Srp14	3'UTR	protein_coding	KNOWN	NA	NA
chr2	118476109	118476139	14569[gene=ENSMUSG00000009549][PH=5][PH0=0.17][P=1.6e-03]	5	-	2	ENSMUSG00000009549	Srp14	3'UTR	protein_coding	KNOWN	NA	NA
chr2	32682612	32682642	4769[gene=ENSMUSG00000009566][PH=4][PH0=0.01][P=2.7e-06]	4	-	2	ENSMUSG00000009566	Fpgs	3'UTR	protein_coding	KNOWN	NA	NA
chr15	103197919	103197949	13902[gene=ENSMUSG00000009575][PH=5][PH0=0.04][P=6.0e-06]	5	-	2	ENSMUSG00000009575	Cbx5	3'UTR	protein_coding	KNOWN	NA	NA
chr15	103196192	103196222	13860[gene=ENSMUSG00000009575][PH=7][PH0=0.04][P=3.1e-10]	7	-	3	ENSMUSG00000009575	Cbx5	3'UTR	protein_coding	KNOWN	NA	NA
chr15	79907682	79907712	6382[gene=ENSMUSG00000009585][PH=4][PH0=0.04][P=3.8e-04]	4	+	3	ENSMUSG00000009585	Apobec3	3'UTR|intron	protein_coding	KNOWN	NA	NA
chr15	79907702	79907732	6384[gene=ENSMUSG00000009585][PH=4][PH0=0.04][P=3.8e-04]	4	+	2	ENSMUSG00000009585	Apobec3	3'UTR|intron	protein_coding	KNOWN	NA	NA
chr8	33619607	33619637	2132[gene=ENSMUSG00000009630][PH=18][PH0=0.06][P=1.0e-100]	18	+	3	ENSMUSG00000009630	Ppp2cb	3'UTR	protein_coding	KNOWN	NA	NA
chr8	33619560	33619590	2119[gene=ENSMUSG00000009630][PH=6][PH0=0.06][P=3.4e-07]	6	+	3	ENSMUSG00000009630	Ppp2cb	3'UTR	protein_coding	KNOWN	NA	NA
chr10	59451234	59451264	6252[gene=ENSMUSG00000009647][PH=4][PH0=0.01][P=3.7e-05]	4	-	3	ENSMUSG00000009647	Mcu	CDS	protein_coding	KNOWN	NA	NA
chr10	59448136	59448166	6237[gene=ENSMUSG00000009647][PH=3][PH0=0.01][P=7.5e-03]	3	-	2	ENSMUSG00000009647	Mcu	3'UTR	protein_coding	KNOWN	NA	NA
chr10	75184481	75184511	8921[gene=ENSMUSG00000009681][PH=3][PH0=0.00][P=1.6e-04]	3	+	2	ENSMUSG00000009681	Bcr	3'UTR	protein_coding	KNOWN	NA	NA
chr1	106771587	106771617	13258[gene=ENSMUSG00000009907][PH=5][PH0=0.04][P=3.0e-06]	5	-	3	ENSMUSG00000009907	Vps4b	3'UTR|intron	protein_coding	KNOWN	NA	NA
chr1	106771028	106771058	13246[gene=ENSMUSG00000009907][PH=5][PH0=0.04][P=3.0e-06]	5	-	3	ENSMUSG00000009907	Vps4b	3'UTR|intron	protein_coding	KNOWN	NA	NA
chr9	107592600	107592630	14505[gene=ENSMUSG00000079334][PH=3][PH0=0.03][P=7.8e-03]	3	+	1	ENSMUSG00000010048	Ifrd2	3'UTR	protein_coding	KNOWN	NA	NA
chr9	107592650	107592680	14511[gene=ENSMUSG00000079334][PH=5][PH0=0.03][P=7.7e-07]	5	+	3	ENSMUSG00000010048	Ifrd2	3'UTR	protein_coding	KNOWN	NA	NA
chr19	8707618	8707648	4498[gene=ENSMUSG00000010095][PH=8][PH0=0.04][P=3.2e-13]	8	-	3	ENSMUSG00000010095	Slc3a2	3'UTR	protein_coding	KNOWN	NA	NA
chr19	8767376	8767406	2174[gene=ENSMUSG00000010097][PH=6][PH0=0.03][P=7.9e-09]	6	+	3	ENSMUSG00000010097	Nxf1	CDS	protein_coding	KNOWN	NA	NA
chr9	21074900	21074930	1090[gene=ENSMUSG00000010205][PH=15][PH0=0.09][P=1.0e-100]	15	-	3	ENSMUSG00000010205	Raver1	3'UTR	protein_coding	KNOWN	NA	NA
chr9	21077157	21077187	1128[gene=ENSMUSG00000010205][PH=4][PH0=0.09][P=7.1e-03]	4	-	1	ENSMUSG00000010205	Raver1	intron	protein_coding	KNOWN	NA	NA
chr9	21075208	21075238	1113[gene=ENSMUSG00000010205][PH=12][PH0=0.09][P=1.0e-100]	12	-	3	ENSMUSG00000010205	Raver1	3'UTR	protein_coding	KNOWN	NA	NA
chr11	78287678	78287708	15061[gene=ENSMUSG00000010277][PH=5][PH0=0.02][P=4.0e-07]	5	+	2	ENSMUSG00000010277	2610507B11Rik	CDS|intron	protein_coding	KNOWN	NA	NA
chr11	76726609	76726639	12812[gene=ENSMUSG00000010392][PH=8][PH0=0.03][P=4.2e-13]	8	-	3	ENSMUSG00000010392	Gosr1	3'UTR	protein_coding	KNOWN	NA	NA
chr11	76728347	76728377	12844[gene=ENSMUSG00000010392][PH=7][PH0=0.03][P=8.8e-11]	7	-	3	ENSMUSG00000010392	Gosr1	3'UTR	protein_coding	KNOWN	NA	NA
chr11	74784190	74784220	13134[gene=ENSMUSG00000010554][PH=5][PH0=0.02][P=2.5e-07]	5	+	2	ENSMUSG00000010554	Mettl16	CDS	protein_coding	KNOWN	NA	NA
chr11	74817911	74817941	13165[gene=ENSMUSG00000010554][PH=3][PH0=0.02][P=7.4e-03]	3	+	3	ENSMUSG00000010554	Mettl16	3'UTR	protein_coding	KNOWN	NA	NA
chr12	83682743	83682773	9272[gene=ENSMUSG00000010608][PH=9][PH0=0.08][P=3.9e-12]	9	+	3	ENSMUSG00000010608	Rbm25	3'UTR	protein_coding	KNOWN	NA	NA
chr12	83681891	83681921	9246[gene=ENSMUSG00000010608][PH=4][PH0=0.08][P=9.3e-03]	4	+	3	ENSMUSG00000010608	Rbm25	3'UTR	protein_coding	KNOWN	NA	NA
chr7	143587150	143587180	14271[gene=ENSMUSG00000010755][PH=3][PH0=0.02][P=6.4e-03]	3	-	2	ENSMUSG00000010755	Cars	CDS	protein_coding	KNOWN	NA	NA
chr2	103021935	103021965	12885[gene=ENSMUSG00000010914][PH=3][PH0=0.01][P=8.6e-04]	3	-	3	ENSMUSG00000010914	Pdhx	3'UTR	protein_coding	KNOWN	NA	NA
chr12	17546258	17546288	2612[gene=ENSMUSG00000011179][PH=10][PH0=0.05][P=1.0e-100]	10	+	3	ENSMUSG00000011179	Odc1	intron	protein_coding	KNOWN	NA	NA
chr11	46144383	46144413	7223[gene=ENSMUSG00000011256][PH=6][PH0=0.02][P=1.5e-09]	6	+	3	ENSMUSG00000011256	Adam19	3'UTR	protein_coding	KNOWN	NA	NA
chr11	46147310	46147340	7249[gene=ENSMUSG00000011256][PH=6][PH0=0.02][P=1.5e-09]	6	+	3	ENSMUSG00000011256	Adam19	3'UTR	protein_coding	KNOWN	NA	NA
chr7	29831147	29831177	1986[gene=ENSMUSG00000011427][PH=4][PH0=0.03][P=4.9e-05]	4	+	3	ENSMUSG00000011427	Zfp790	3'UTR	protein_coding	KNOWN	NA	NA
chr11	77507181	77507211	14536[gene=ENSMUSG00000011877][PH=5][PH0=0.02][P=1.7e-07]	5	+	2	ENSMUSG00000011877	Git1	3'UTR	protein_coding	KNOWN	NA	NA
chr5	114669629	114669659	9896[gene=ENSMUSG00000011884][PH=3][PH0=0.02][P=3.3e-03]	3	-	2	ENSMUSG00000011884	Gltp	3'UTR	protein_coding	KNOWN	NA	NA
chr5	114669518	114669548	9889[gene=ENSMUSG00000011884][PH=5][PH0=0.02][P=1.1e-07]	5	-	3	ENSMUSG00000011884	Gltp	3'UTR	protein_coding	KNOWN	NA	NA
chr9	70007411	70007441	10492[gene=ENSMUSG00000011958][PH=7][PH0=0.04][P=3.1e-10]	7	+	2	ENSMUSG00000011958	Bnip2	3'UTR	protein_coding	KNOWN	NA	NA
chr15	98539444	98539474	12642[gene=ENSMUSG00000011960][PH=9][PH0=0.11][P=5.0e-11]	9	-	3	ENSMUSG00000011960	Ccnt1	3'UTR|intron	protein_coding	KNOWN	NA	NA
chr15	98538701	98538731	12617[gene=ENSMUSG00000011960][PH=11][PH0=0.11][P=1.0e-100]	11	-	3	ENSMUSG00000011960	Ccnt1	3'UTR	protein_coding	KNOWN	NA	NA
chr15	98542710	98542740	12722[gene=ENSMUSG00000011960][PH=32][PH0=0.11][P=1.0e-100]	32	-	3	ENSMUSG00000011960	Ccnt1	3'UTR|intron	protein_coding	KNOWN	NA	NA
chr17	46258220	46258250	6647[gene=ENSMUSG00000012296][PH=8][PH0=0.02][P=1.0e-100]	8	-	3	ENSMUSG00000012296	Tjap1	3'UTR	protein_coding	KNOWN	NA	NA
chr6	8255953	8255983	161[gene=ENSMUSG00000012483][PH=4][PH0=0.02][P=8.6e-06]	4	-	2	ENSMUSG00000012483	Rpa3	3'UTR	protein_coding	KNOWN	NA	NA
chr6	29547160	29547190	1094[gene=ENSMUSG00000012535][PH=4][PH0=0.03][P=2.0e-04]	4	-	3	ENSMUSG00000012535	Tnpo3	downstream 10K|intron	protein_coding	KNOWN	NA	NA
chr7	43296740	43296770	3431[gene=ENSMUSG00000012640][PH=4][PH0=0.02][P=6.1e-06]	4	-	3	ENSMUSG00000012640	Zfp715	3'UTR|intron	protein_coding	KNOWN	NA	NA
chr10	60358470	60358500	6441[gene=ENSMUSG00000012819][PH=2][PH0=0.00][P=1.5e-03]	2	-	2	ENSMUSG00000012819	Cdh23	intron	protein_coding	KNOWN	NA	NA
chr7	12925407	12925437	487[gene=ENSMUSG00000012848][PH=4][PH0=0.05][P=5.2e-04]	4	+	1	ENSMUSG00000012848	Rps5	CDS	protein_coding	KNOWN	NA	NA
chr7	12922982	12923012	478[gene=ENSMUSG00000012848][PH=6][PH0=0.05][P=7.6e-08]	6	+	2	ENSMUSG00000012848	Rps5	CDS	protein_coding	KNOWN	NA	NA
chr7	12926660	12926690	504[gene=ENSMUSG00000012848][PH=4][PH0=0.05][P=5.2e-04]	4	+	2	ENSMUSG00000012848	Rps5	3'UTR	protein_coding	KNOWN	NA	NA
chr8	105530942	105530972	7423[gene=ENSMUSG00000013160][PH=5][PH0=0.01][P=4.1e-09]	5	-	3	ENSMUSG00000013160	Atp6v0d1	CDS	protein_coding	KNOWN	NA	NA
chr1	131848780	131848810	11030[gene=ENSMUSG00000013275][PH=36][PH0=0.12][P=1.0e-100]	36	+	3	ENSMUSG00000013275	Slc41a1	3'UTR	protein_coding	KNOWN	NA	NA
chr19	32695857	32695887	6727[gene=ENSMUSG00000013662][PH=8][PH0=0.06][P=6.5e-11]	8	-	2	ENSMUSG00000013662	Atad1	CDS	protein_coding	KNOWN	NA	NA
chr19	32672623	32672653	6625[gene=ENSMUSG00000013662][PH=13][PH0=0.06][P=1.0e-100]	13	-	3	ENSMUSG00000013662	Atad1	3'UTR	protein_coding	KNOWN	NA	NA
chr19	32800033	32800063	6341[gene=ENSMUSG00000013663][PH=5][PH0=0.03][P=3.8e-06]	5	+	3	ENSMUSG00000013663	Pten	CDS	protein_coding	KNOWN	NA	NA
chr19	32811740	32811770	6363[gene=ENSMUSG00000013663][PH=5][PH0=0.03][P=3.8e-06]	5	+	2	ENSMUSG00000013663	Pten	CDS	protein_coding	KNOWN	NA	NA
chr1	172197391	172197421	23391[gene=ENSMUSG00000013698][PH=4][PH0=0.01][P=1.3e-06]	4	-	1	ENSMUSG00000013698	Pea15a	3'UTR	protein_coding	KNOWN	NA	NA
chr14	32191848	32191878	1851[gene=ENSMUSG00000013701][PH=26][PH0=0.06][P=1.0e-100]	26	-	3	ENSMUSG00000013701	Timm23	downstream 10K|intron	protein_coding	KNOWN	NA	NA
chr15	67105503	67105533	7199[gene=ENSMUSG00000013846][PH=9][PH0=0.05][P=6.3e-14]	9	-	3	ENSMUSG00000013846	St3gal1	3'UTR	protein_coding	KNOWN	NA	NA
chr1	171341320	171341350	17231[gene=ENSMUSG00000013973][PH=3][PH0=0.03][P=6.0e-03]	3	+	1	ENSMUSG00000013973	Dedd	3'UTR	protein_coding	KNOWN	NA	NA
chr16	97792611	97792641	10613[gene=ENSMUSG00000014039][PH=8][PH0=0.01][P=1.0e-100]	8	-	3	ENSMUSG00000014039	Prdm15	3'UTR	protein_coding	KNOWN	NA	NA
chr16	32300633	32300663	3891[gene=ENSMUSG00000014074][PH=8][PH0=0.02][P=1.0e-100]	8	+	3	ENSMUSG00000014074	Rnf168	3'UTR	protein_coding	KNOWN	NA	NA
chr11	62894254	62894284	11438[gene=ENSMUSG00000014177][PH=4][PH0=0.02][P=2.2e-05]	4	+	2	ENSMUSG00000014177	Tvp23b	3'UTR|intron	protein_coding	KNOWN	NA	NA
chr11	62895154	62895184	11461[gene=ENSMUSG00000014177][PH=3][PH0=0.02][P=3.6e-03]	3	+	3	ENSMUSG00000014177	Tvp23b	3'UTR|intron	protein_coding	KNOWN	NA	NA
chr11	100582833	100582863	19042[gene=ENSMUSG00000014195][PH=9][PH0=0.03][P=1.0e-100]	9	-	3	ENSMUSG00000014195	Dnajc7	3'UTR	protein_coding	KNOWN	NA	NA
chr1	160203424	160203454	20432[gene=ENSMUSG00000014226][PH=3][PH0=0.02][P=2.7e-03]	3	-	2	ENSMUSG00000014226	Cacybp	3'UTR	protein_coding	KNOWN	NA	NA
chr16	3929873	3929903	99[gene=ENSMUSG00000014232][PH=5][PH0=0.02][P=7.7e-08]	5	+	2	ENSMUSG00000014232	Cluap1	CDS|downstream 10K	protein_coding	KNOWN	NA	NA
chr11	96049691	96049721	17467[gene=ENSMUSG00000014349][PH=34][PH0=0.08][P=1.0e-100]	34	-	3	ENSMUSG00000014349	Ube2z	3'UTR	protein_coding	KNOWN	NA	NA
chr11	96049577	96049607	17432[gene=ENSMUSG00000014349][PH=7][PH0=0.08][P=1.5e-08]	7	-	3	ENSMUSG00000014349	Ube2z	3'UTR	protein_coding	KNOWN	NA	NA
chr2	128851909	128851939	17231[gene=ENSMUSG00000014353][PH=5][PH0=0.02][P=2.4e-07]	5	+	2	ENSMUSG00000014353	Tmem87b	3'UTR	protein_coding	KNOWN	NA	NA
chr2	128853559	128853589	17246[gene=ENSMUSG00000014353][PH=4][PH0=0.02][P=4.5e-05]	4	+	3	ENSMUSG00000014353	Tmem87b	3'UTR	protein_coding	KNOWN	NA	NA
chr2	128672101	128672131	16378[gene=ENSMUSG00000014355][PH=3][PH0=0.02][P=9.7e-03]	3	-	3	ENSMUSG00000014355	Anapc1	CDS	protein_coding	KNOWN	NA	NA
chr2	128628538	128628568	16322[gene=ENSMUSG00000014355][PH=3][PH0=0.02][P=9.7e-03]	3	-	3	ENSMUSG00000014355	Anapc1	CDS	protein_coding	KNOWN	NA	NA
chr14	31778951	31778981	1667[gene=ENSMUSG00000014496][PH=5][PH0=0.04][P=8.1e-06]	5	-	3	ENSMUSG00000014496	Ankrd28	CDS	protein_coding	KNOWN	NA	NA
chr10	128393242	128393272	16231[gene=ENSMUSG00000014498][PH=15][PH0=0.04][P=1.0e-100]	15	+	3	ENSMUSG00000014498	Ankrd52	3'UTR|intron	protein_coding	KNOWN	NA	NA
chr10	128391569	128391599	16209[gene=ENSMUSG00000014498][PH=4][PH0=0.04][P=7.0e-04]	4	+	2	ENSMUSG00000014498	Ankrd52	3'UTR|intron	protein_coding	KNOWN	NA	NA
chr10	128390764	128390794	16196[gene=ENSMUSG00000014498][PH=7][PH0=0.04][P=5.2e-10]	7	+	3	ENSMUSG00000014498	Ankrd52	3'UTR|intron	protein_coding	KNOWN	NA	NA
chr4	151792244	151792274	14851[gene=ENSMUSG00000014592][PH=3][PH0=0.00][P=4.1e-04]	3	-	1	ENSMUSG00000014592	Camta1	downstream 10K|intron	protein_coding	KNOWN	NA	NA
chr4	151048491	151048521	14808[gene=ENSMUSG00000014592][PH=3][PH0=0.00][P=4.1e-04]	3	-	2	ENSMUSG00000014592	Camta1	3'UTR|intron	protein_coding	KNOWN	NA	NA
chr4	151792337	151792367	14859[gene=ENSMUSG00000014592][PH=5][PH0=0.00][P=3.5e-10]	5	-	3	ENSMUSG00000014592	Camta1	downstream 10K|intron	protein_coding	KNOWN	NA	NA
chr11	70644592	70644622	11695[gene=ENSMUSG00000014606][PH=3][PH0=0.03][P=6.4e-03]	3	-	2	ENSMUSG00000014606	Slc25a11	3'UTR	protein_coding	KNOWN	NA	NA
chr5	110171406	110171436	9851[gene=ENSMUSG00000014668][PH=5][PH0=0.03][P=1.9e-06]	5	+	2	ENSMUSG00000014668	Chfr	3'UTR	protein_coding	KNOWN	NA	NA
chr5	110171482	110171512	9869[gene=ENSMUSG00000014668][PH=12][PH0=0.03][P=2.8e-13]	12	+	3	ENSMUSG00000014668	Chfr	3'UTR	protein_coding	KNOWN	NA	NA
chr17	15402320	15402350	1317[gene=ENSMUSG00000014763][PH=3][PH0=0.02][P=2.8e-03]	3	+	2	ENSMUSG00000014763	Fam120b	CDS	protein_coding	KNOWN	NA	NA
chr17	15517025	15517055	1379[gene=ENSMUSG00000014767][PH=11][PH0=0.03][P=1.0e-100]	11	+	3	ENSMUSG00000014767	Tbp	3'UTR	protein_coding	KNOWN	NA	NA
chr17	15480651	15480681	677[gene=ENSMUSG00000014769][PH=3][PH0=0.02][P=2.6e-03]	3	-	1	ENSMUSG00000014769	Psmb1	intron	protein_coding	KNOWN	NA	NA
chr8	105305322	105305352	11060[gene=ENSMUSG00000014859][PH=8][PH0=0.05][P=1.9e-12]	8	+	3	ENSMUSG00000014859	E2f4	3'UTR	protein_coding	KNOWN	NA	NA
chr2	26920082	26920112	3859[gene=ENSMUSG00000014873][PH=7][PH0=0.03][P=3.1e-11]	7	+	3	ENSMUSG00000014873	Surf2	3'UTR	protein_coding	KNOWN	NA	NA
chr8	66890111	66890141	3994[gene=ENSMUSG00000014907][PH=13][PH0=0.07][P=1.0e-100]	13	+	3	ENSMUSG00000014907	Naf1	3'UTR	protein_coding	KNOWN	NA	NA
chr8	66890331	66890361	4023[gene=ENSMUSG00000014907][PH=4][PH0=0.07][P=5.1e-03]	4	+	1	ENSMUSG00000014907	Naf1	3'UTR	protein_coding	KNOWN	NA	NA
chr8	66890033	66890063	3976[gene=ENSMUSG00000014907][PH=9][PH0=0.07][P=1.8e-12]	9	+	3	ENSMUSG00000014907	Naf1	3'UTR	protein_coding	KNOWN	NA	NA
chr8	66890272	66890302	4013[gene=ENSMUSG00000014907][PH=7][PH0=0.07][P=1.8e-08]	7	+	3	ENSMUSG00000014907	Naf1	3'UTR	protein_coding	KNOWN	NA	NA
chr8	66889587	66889617	3940[gene=ENSMUSG00000014907][PH=12][PH0=0.07][P=1.0e-100]	12	+	3	ENSMUSG00000014907	Naf1	3'UTR	protein_coding	KNOWN	NA	NA
chr8	66889953	66889983	3963[gene=ENSMUSG00000014907][PH=6][PH0=0.07][P=1.4e-06]	6	+	2	ENSMUSG00000014907	Naf1	3'UTR	protein_coding	KNOWN	NA	NA
chr5	32483372	32483402	2995[gene=ENSMUSG00000014956][PH=14][PH0=0.16][P=1.0e-100]	14	+	3	ENSMUSG00000014956	Ppp1cb	CDS	protein_coding	KNOWN	NA	NA
chr5	32491501	32491531	3096[gene=ENSMUSG00000014956][PH=7][PH0=0.16][P=4.6e-06]	7	+	3	ENSMUSG00000014956	Ppp1cb	3'UTR|intron	protein_coding	KNOWN	NA	NA
chr5	32483420	32483450	3011[gene=ENSMUSG00000014956][PH=5][PH0=0.16][P=5.7e-03]	5	+	3	ENSMUSG00000014956	Ppp1cb	CDS	protein_coding	KNOWN	NA	NA
chr5	32491793	32491823	3145[gene=ENSMUSG00000014956][PH=31][PH0=0.16][P=1.0e-100]	31	+	3	ENSMUSG00000014956	Ppp1cb	3'UTR|intron	protein_coding	KNOWN	NA	NA
chr5	32491317	32491347	3079[gene=ENSMUSG00000014956][PH=6][PH0=0.16][P=1.8e-04]	6	+	3	ENSMUSG00000014956	Ppp1cb	3'UTR|intron	protein_coding	KNOWN	NA	NA
chr5	32491217	32491247	3054[gene=ENSMUSG00000014956][PH=6][PH0=0.16][P=1.8e-04]	6	+	3	ENSMUSG00000014956	Ppp1cb	3'UTR|intron	protein_coding	KNOWN	NA	NA
chr5	32492204	32492234	3253[gene=ENSMUSG00000014956][PH=9][PH0=0.16][P=2.0e-09]	9	+	3	ENSMUSG00000014956	Ppp1cb	3'UTR|intron	protein_coding	KNOWN	NA	NA
chr5	32492337	32492367	3273[gene=ENSMUSG00000014956][PH=8][PH0=0.16][P=1.0e-07]	8	+	3	ENSMUSG00000014956	Ppp1cb	3'UTR|intron	protein_coding	KNOWN	NA	NA
chr5	32491272	32491302	3064[gene=ENSMUSG00000014956][PH=13][PH0=0.16][P=1.0e-100]	13	+	3	ENSMUSG00000014956	Ppp1cb	3'UTR|intron	protein_coding	KNOWN	NA	NA
chr5	32492069	32492099	3209[gene=ENSMUSG00000014956][PH=53][PH0=0.16][P=1.0e-100]	53	+	3	ENSMUSG00000014956	Ppp1cb	3'UTR|intron	protein_coding	KNOWN	NA	NA
chr15	65872435	65872465	5262[gene=ENSMUSG00000015002][PH=3][PH0=0.02][P=9.5e-03]	3	+	2	ENSMUSG00000015002	Efr3a	3'UTR	protein_coding	KNOWN	NA	NA
chr15	65873041	65873071	5278[gene=ENSMUSG00000015002][PH=3][PH0=0.02][P=9.5e-03]	3	+	2	ENSMUSG00000015002	Efr3a	3'UTR	protein_coding	KNOWN	NA	NA
chr15	65873006	65873036	5275[gene=ENSMUSG00000015002][PH=4][PH0=0.02][P=6.2e-05]	4	+	3	ENSMUSG00000015002	Efr3a	3'UTR	protein_coding	KNOWN	NA	NA
chr15	65871536	65871566	5244[gene=ENSMUSG00000015002][PH=5][PH0=0.02][P=3.0e-07]	5	+	2	ENSMUSG00000015002	Efr3a	3'UTR	protein_coding	KNOWN	NA	NA
chr8	122615548	122615578	14217[gene=ENSMUSG00000092329][PH=5][PH0=0.01][P=3.5e-08]	5	+	3	ENSMUSG00000015013	Trappc2l	3'UTR|intron	protein_coding	KNOWN	NA	NA
chr8	110975047	110975077	8107[gene=ENSMUSG00000015023][PH=3][PH0=0.02][P=1.7e-03]	3	-	2	ENSMUSG00000015023	Ddx19a	3'UTR	protein_coding	KNOWN	NA	NA
chr12	80167993	80168023	5479[gene=ENSMUSG00000015143][PH=24][PH0=0.08][P=3.1e-13]	24	-	3	ENSMUSG00000015143	Actn1	3'UTR	protein_coding	KNOWN	NA	NA
chr12	80168082	80168112	5501[gene=ENSMUSG00000015143][PH=5][PH0=0.08][P=3.2e-04]	5	-	2	ENSMUSG00000015143	Actn1	3'UTR	protein_coding	KNOWN	NA	NA
chr12	80167604	80167634	5407[gene=ENSMUSG00000015143][PH=6][PH0=0.08][P=5.0e-06]	6	-	2	ENSMUSG00000015143	Actn1	3'UTR	protein_coding	KNOWN	NA	NA
chr12	80167731	80167761	5429[gene=ENSMUSG00000015143][PH=19][PH0=0.08][P=3.1e-13]	19	-	3	ENSMUSG00000015143	Actn1	3'UTR	protein_coding	KNOWN	NA	NA
chr12	80168161	80168191	5512[gene=ENSMUSG00000015143][PH=5][PH0=0.08][P=3.2e-04]	5	-	3	ENSMUSG00000015143	Actn1	3'UTR	protein_coding	KNOWN	NA	NA
chr7	28788356	28788386	1789[gene=ENSMUSG00000015149][PH=3][PH0=0.01][P=1.1e-03]	3	+	3	ENSMUSG00000015149	Sirt2	3'UTR	protein_coding	KNOWN	NA	NA
chr7	28822052	28822082	1853[gene=ENSMUSG00000015165][PH=7][PH0=0.06][P=3.7e-09]	7	+	2	ENSMUSG00000015165	Hnrnpl	3'UTR	protein_coding	KNOWN	NA	NA
chr7	28815295	28815325	1821[gene=ENSMUSG00000015165][PH=5][PH0=0.06][P=2.7e-05]	5	+	3	ENSMUSG00000015165	Hnrnpl	CDS	protein_coding	KNOWN	NA	NA
chr7	28822207	28822237	1866[gene=ENSMUSG00000015165][PH=6][PH0=0.06][P=3.4e-07]	6	+	1	ENSMUSG00000015165	Hnrnpl	3'UTR	protein_coding	KNOWN	NA	NA
chr6	4642993	4643023	226[gene=ENSMUSG00000015189][PH=3][PH0=0.02][P=7.2e-03]	3	+	2	ENSMUSG00000015189	Casd1	3'UTR	protein_coding	KNOWN	NA	NA
chr6	4643025	4643055	229[gene=ENSMUSG00000015189][PH=4][PH0=0.02][P=5.3e-05]	4	+	1	ENSMUSG00000015189	Casd1	3'UTR	protein_coding	KNOWN	NA	NA
chr6	4643290	4643320	244[gene=ENSMUSG00000015189][PH=3][PH0=0.02][P=7.2e-03]	3	+	2	ENSMUSG00000015189	Casd1	3'UTR	protein_coding	KNOWN	NA	NA
[truncated: 7,649 more rows]

## Sheet: C. CLIP, 4h, KO-only sites
pan-ZFP36 HITS-CLIP peaks identified in ZFP36 KO CD4+ T-cells (B), but not WT cells (A)
column	description
chr	chromosome
[truncated: 690 more rows]

## Sheet: D.CLIP, 4h, all biological reps
pan-ZFP36 HITS-CLIP peaks from pooled WT and KO CD4+ T-cells
[truncated: 14,578 more rows]
