# Supplementary material for: ZFP36 RNA-binding proteins restrain T cell activation and anti-viral immunity
Source: eLife. 2018 May 31;7:e33057. doi: 10.7554/eLife.33057 (PMC6033538; doi:10.7554/eLife.33057)
Supplement: Supplementary File 2. [file elife-33057-supp2.xlsx]

## Sheet: Supplementary_Table_S2.txt
GO.ID	Term	Annoatated	Significant	Expected	p.value	FDR
GO:0005634	nucleus	4799	2346	1906.1	6.8e-63	5.74e-59
GO:0044428	nuclear part	2967	1569	1178.45	3.57e-63	5.74e-59
GO:0031981	nuclear lumen	2629	1403	1044.2	4.6e-58	2.59e-54
GO:0044424	intracellular part	9198	4000	3653.32	1.49e-54	6.3e-51
GO:0043231	intracellular membrane-bounded organelle	7616	3419	3024.97	1.61e-53	5.45e-50
GO:0070013	intracellular organelle lumen	2948	1520	1170.9	3.99e-51	1.12e-47
GO:0043233	organelle lumen	2952	1521	1172.49	6.45e-51	1.56e-47
GO:0031974	membrane-enclosed lumen	3008	1544	1194.74	1.56e-50	2.92e-47
GO:0043229	intracellular organelle	8217	3632	3263.68	1.44e-50	2.92e-47
GO:0005622	intracellular	9552	4108	3793.92	1.11e-49	1.87e-46
GO:0044446	intracellular organelle part	5649	2635	2243.7	1.22e-48	1.88e-45
GO:0044260	cellular macromolecule metabolic process	5537	2574	2192.73	8.25e-47	1.16e-43
GO:0043227	membrane-bounded organelle	8239	3625	3272.42	1.32e-46	1.71e-43
GO:0005654	nucleoplasm	2000	1080	794.37	1.26e-45	1.52e-42
GO:0044422	organelle part	5725	2648	2273.89	1.38e-44	1.56e-41
GO:0043226	organelle	8716	3781	3461.87	1.16e-41	1.22e-38
GO:0043170	macromolecule metabolic process	5953	2696	2357.47	3.2e-37	3.18e-34
GO:0044237	cellular metabolic process	6985	3083	2766.16	5.34e-34	5.01e-31
GO:0010467	gene expression	3633	1737	1438.72	8.06e-34	7.16e-31
GO:0005515	protein binding	8386	3591	3295.09	2.05e-33	1.73e-30
GO:0044267	cellular protein metabolic process	3121	1515	1235.96	1.94e-32	1.56e-29
GO:0060255	regulation of macromolecule metabolic pr...	3545	1693	1403.87	2.65e-32	2.03e-29
GO:0005623	cell	10184	4267	4044.94	4.5e-32	3.31e-29
GO:0031323	regulation of cellular metabolic process	3861	1823	1529.01	5.98e-32	4.21e-29
GO:0044464	cell part	10163	4257	4036.6	2.57e-31	1.74e-28
GO:0080090	regulation of primary metabolic process	3757	1773	1487.82	1.42e-30	9.21e-28
GO:0016070	RNA metabolic process	2995	1450	1186.06	5.86e-30	3.66e-27
GO:0044238	primary metabolic process	6947	3045	2751.11	1.97e-29	1.19e-26
GO:0019222	regulation of metabolic process	4276	1976	1693.35	2.07e-28	1.21e-25
GO:0006464	cellular protein modification process	2391	1181	946.87	1.03e-27	5.62e-25
GO:0036211	protein modification process	2391	1181	946.87	1.03e-27	5.62e-25
GO:1901363	heterocyclic compound binding	3882	1799	1525.35	1.1e-27	5.81e-25
GO:0090304	nucleic acid metabolic process	3436	1624	1360.7	1.4e-27	7.18e-25
GO:0010468	regulation of gene expression	2827	1366	1119.53	2.51e-27	1.25e-24
GO:0043412	macromolecule modification	2508	1228	993.2	5.58e-27	2.69e-24
GO:0097159	organic cyclic compound binding	3917	1807	1539.1	1.67e-26	7.84e-24
GO:0071704	organic substance metabolic process	7162	3110	2836.25	3.89e-26	1.78e-23
GO:0051254	positive regulation of RNA metabolic pro...	926	519	366.71	4.94e-26	2.2e-23
GO:0009059	macromolecule biosynthetic process	3323	1568	1315.95	6.68e-26	2.75e-23
GO:0010556	regulation of macromolecule biosynthetic...	2611	1267	1033.99	6.59e-26	2.75e-23
GO:0019538	protein metabolic process	3505	1644	1388.03	6.68e-26	2.75e-23
GO:0010604	positive regulation of macromolecule met...	1664	854	658.97	1.09e-25	4.38e-23
GO:0034645	cellular macromolecule biosynthetic proc...	3257	1539	1289.82	1.21e-25	4.74e-23
GO:2000112	regulation of cellular macromolecule bio...	2554	1240	1011.42	2.28e-25	8.73e-23
GO:0006139	nucleobase-containing compound metabolic...	4122	1896	1632.37	2.44e-25	9.16e-23
GO:0051171	regulation of nitrogen compound metaboli...	2968	1414	1175.37	5.47e-25	2.01e-22
GO:0019219	regulation of nucleobase-containing comp...	2931	1398	1160.72	6.45e-25	2.32e-22
GO:0031325	positive regulation of cellular metaboli...	1661	848	657.78	1.44e-24	5.06e-22
GO:0051173	positive regulation of nitrogen compound...	1064	578	421.36	1.92e-24	6.62e-22
GO:0016568	chromatin modification	460	288	182.17	2.73e-24	9.21e-22
GO:0045935	positive regulation of nucleobase-contai...	1040	566	411.85	3.52e-24	1.17e-21
GO:0032991	macromolecular complex	3673	1709	1458.86	4.06e-24	1.32e-21
GO:0006366	transcription from RNA polymerase II pro...	1212	644	479.97	6.13e-24	1.95e-21
GO:0009889	regulation of biosynthetic process	2719	1303	1076.76	6.54e-24	2.05e-21
GO:0045893	positive regulation of transcription, DN...	877	489	347.3	7.48e-24	2.3e-21
GO:0003676	nucleic acid binding	2426	1170	953.24	9.74e-24	2.94e-21
GO:0031326	regulation of cellular biosynthetic proc...	2692	1289	1066.07	2.02e-23	5.99e-21
GO:0009893	positive regulation of metabolic process	1788	899	708.07	2.08e-23	6.05e-21
GO:0046483	heterocycle metabolic process	4213	1922	1668.41	2.21e-23	6.33e-21
GO:0010557	positive regulation of macromolecule bio...	1023	555	405.12	2.81e-23	7.91e-21
GO:0006357	regulation of transcription from RNA pol...	1166	619	461.75	7.42e-23	2.05e-20
GO:0006725	cellular aromatic compound metabolic pro...	4218	1920	1670.39	1.06e-22	2.88e-20
GO:0009987	cellular process	9644	4020	3819.16	1.27e-22	3.41e-20
GO:0031328	positive regulation of cellular biosynth...	1085	581	429.67	1.39e-22	3.68e-20
GO:0070647	protein modification by small protein co...	697	399	276.02	2.52e-22	6.55e-20
GO:0010628	positive regulation of gene expression	985	534	390.07	2.69e-22	6.89e-20
GO:0009891	positive regulation of biosynthetic proc...	1100	586	435.62	4.43e-22	1.12e-19
GO:0051252	regulation of RNA metabolic process	2379	1148	942.12	5.94e-22	1.47e-19
GO:0034641	cellular nitrogen compound metabolic pro...	4325	1958	1712.76	9.06e-22	2.22e-19
GO:0048518	positive regulation of biological proces...	3122	1461	1236.36	1.02e-21	2.46e-19
GO:0048522	positive regulation of cellular process	2837	1340	1123.49	1.72e-21	4.1e-19
GO:1901360	organic cyclic compound metabolic proces...	4321	1953	1711.18	3.16e-21	7.42e-19
GO:0005488	binding	10076	4146	3959.14	3.96e-21	9.17e-19
GO:0006351	transcription, DNA-dependent	2353	1131	931.82	8e-21	1.83e-18
GO:0032774	RNA biosynthetic process	2369	1135	938.16	2.73e-20	6.14e-18
GO:0044451	nucleoplasm part	667	379	264.92	3.46e-20	7.7e-18
GO:1901576	organic substance biosynthetic process	3912	1778	1549.21	5.37e-20	1.18e-17
GO:0006807	nitrogen compound metabolic process	4542	2033	1798.69	1.08e-19	2.34e-17
GO:0016071	mRNA metabolic process	409	251	161.97	1.33e-19	2.84e-17
GO:0006355	regulation of transcription, DNA-depende...	2292	1098	907.66	1.6e-19	3.38e-17
GO:2001141	regulation of RNA biosynthetic process	2297	1099	909.64	2.59e-19	5.4e-17
GO:0043234	protein complex	3115	1448	1237.23	2.73e-19	5.62e-17
GO:0044249	cellular biosynthetic process	3863	1753	1529.8	3.14e-19	6.39e-17
GO:0050794	regulation of cellular process	6062	2637	2400.64	4.2e-19	8.43e-17
GO:0009058	biosynthetic process	3962	1792	1569.01	5.55e-19	1.1e-16
GO:0006325	chromatin organization	530	308	209.89	1.08e-18	2.11e-16
GO:0019899	enzyme binding	1364	684	535.95	4.16e-18	8.08e-16
GO:0034654	nucleobase-containing compound biosynthe...	2604	1222	1031.22	4.9e-18	9.39e-16
GO:0010605	negative regulation of macromolecule met...	1321	668	523.13	7.3e-18	1.39e-15
GO:0016569	covalent chromatin modification	351	217	139	1.27e-17	2.37e-15
GO:0051276	chromosome organization	725	397	287.11	1.27e-17	2.37e-15
GO:0032446	protein modification by small protein co...	607	341	240.38	1.91e-17	3.5e-15
GO:0019438	aromatic compound biosynthetic process	2653	1239	1050.62	1.99e-17	3.62e-15
GO:0003677	DNA binding	1392	693	546.96	2.12e-17	3.82e-15
GO:0003723	RNA binding	702	383	275.84	2.63e-17	4.68e-15
GO:0018130	heterocycle biosynthetic process	2662	1241	1054.19	3.91e-17	6.89e-15
GO:0008152	metabolic process	7943	3354	3145.54	4.44e-17	7.73e-15
GO:0016570	histone modification	346	213	137.02	5.08e-17	8.75e-15
GO:0006397	mRNA processing	347	213	137.42	8.07e-17	1.38e-14
GO:0045944	positive regulation of transcription fro...	671	369	265.73	8.17e-17	1.38e-14
GO:0050789	regulation of biological process	6412	2758	2539.24	1e-16	1.67e-14
GO:0005730	nucleolus	726	395	288.36	1.15e-16	1.9e-14
GO:0044271	cellular nitrogen compound biosynthetic ...	2692	1250	1066.07	1.5e-16	2.45e-14
GO:0005737	cytoplasm	7206	3073	2862.12	4.93e-16	8.01e-14
GO:0051246	regulation of protein metabolic process	1359	676	538.18	5.36e-16	8.54e-14
GO:1901362	organic cyclic compound biosynthetic pro...	2717	1257	1075.97	5.32e-16	8.54e-14
GO:0016567	protein ubiquitination	573	320	226.92	6.18e-16	9.75e-14
GO:0009892	negative regulation of metabolic process	1408	697	557.59	6.78e-16	1.06e-13
GO:0008134	transcription factor binding	399	234	156.78	1.64e-15	2.54e-13
GO:0048523	negative regulation of cellular process	2550	1183	1009.84	2.19e-15	3.36e-13
GO:0031324	negative regulation of cellular metaboli...	1284	640	508.48	2.22e-15	3.38e-13
GO:0001067	regulatory region nucleic acid binding	498	281	195.68	2.33e-15	3.51e-13
GO:0044212	transcription regulatory region DNA bind...	494	279	194.11	2.51e-15	3.75e-13
GO:0000975	regulatory region DNA binding	497	280	195.29	3.42e-15	5.06e-13
GO:0032268	regulation of cellular protein metabolic...	1221	611	483.53	3.98e-15	5.84e-13
GO:0065007	biological regulation	6695	2856	2651.31	5.26e-15	7.66e-13
GO:0048519	negative regulation of biological proces...	2776	1273	1099.33	1.11e-14	1.6e-12
GO:2000113	negative regulation of cellular macromol...	853	443	337.8	2.66e-14	3.8e-12
GO:0010558	negative regulation of macromolecule bio...	896	462	354.83	3.29e-14	4.67e-12
GO:0006996	organelle organization	2315	1076	916.77	3.95e-14	5.56e-12
GO:0044763	single-organism cellular process	7027	2976	2782.79	8.78e-14	1.23e-11
GO:0010629	negative regulation of gene expression	868	447	343.74	1.17e-13	1.62e-11
GO:0043565	sequence-specific DNA binding	553	301	217.29	1.26e-13	1.73e-11
GO:0018193	peptidyl-amino acid modification	690	365	273.25	2.36e-13	3.22e-11
GO:0044699	single-organism process	7542	3172	2986.74	2.68e-13	3.63e-11
GO:0071840	cellular component organization or bioge...	3753	1665	1486.24	3.74e-13	5.01e-11
GO:0051172	negative regulation of nitrogen compound...	880	450	348.49	4.07e-13	5.42e-11
GO:0045934	negative regulation of nucleobase-contai...	866	443	342.95	5.9e-13	7.79e-11
GO:0009890	negative regulation of biosynthetic proc...	940	476	372.25	6.15e-13	8.06e-11
GO:0031327	negative regulation of cellular biosynth...	918	466	363.54	6.75e-13	8.77e-11
GO:0016482	cytoplasmic transport	677	357	268.1	7.73e-13	9.97e-11
GO:0033554	cellular response to stress	1196	588	473.63	9.97e-13	1.28e-10
GO:0000166	nucleotide binding	1866	870	733.2	1.55e-12	1.95e-10
GO:1901265	nucleoside phosphate binding	1866	870	733.2	1.55e-12	1.95e-10
GO:0030529	ribonucleoprotein complex	648	343	257.38	1.89e-12	2.36e-10
GO:0000988	protein binding transcription factor act...	352	202	138.31	2.64e-12	3.28e-10
GO:0006511	ubiquitin-dependent protein catabolic pr...	423	237	167.51	2.75e-12	3.39e-10
GO:0016043	cellular component organization	3611	1600	1430.01	2.79e-12	3.42e-10
GO:0000989	transcription factor binding transcripti...	349	200	137.13	4.06e-12	4.93e-10
GO:0051253	negative regulation of RNA metabolic pro...	799	409	316.42	4.45e-12	5.37e-10
GO:0004842	ubiquitin-protein ligase activity	247	150	97.05	5.21e-12	6.24e-10
GO:0008104	protein localization	1545	735	611.84	5.65e-12	6.71e-10
GO:0033036	macromolecule localization	1749	822	692.63	6.21e-12	7.33e-10
GO:0045184	establishment of protein localization	1186	579	469.67	7.38e-12	8.66e-10
GO:0070727	cellular macromolecule localization	1019	505	403.54	1.05e-11	1.22e-09
GO:0016881	acid-amino acid ligase activity	273	162	107.27	1.07e-11	1.23e-09
GO:0016879	ligase activity, forming carbon-nitrogen...	304	177	119.45	1.15e-11	1.31e-09
GO:0044265	cellular macromolecule catabolic process	648	339	256.62	1.14e-11	1.31e-09
GO:0035556	intracellular signal transduction	1578	747	624.91	1.27e-11	1.44e-09
GO:0034613	cellular protein localization	1011	501	400.37	1.3e-11	1.46e-09
GO:0045892	negative regulation of transcription, DN...	746	383	295.43	1.36e-11	1.53e-09
GO:0016604	nuclear body	308	180	122.33	1.44e-11	1.59e-09
GO:0043632	modification-dependent macromolecule cat...	439	242	173.85	1.56e-11	1.72e-09
GO:0019787	small conjugating protein ligase activit...	260	155	102.16	1.81e-11	1.98e-09
GO:0019941	modification-dependent protein catabolic...	431	238	170.68	1.83e-11	1.99e-09
GO:0009057	macromolecule catabolic process	770	393	304.93	2.03e-11	2.2e-09
GO:0015031	protein transport	1098	538	434.82	2.19e-11	2.36e-09
GO:0036094	small molecule binding	1946	896	764.64	2.26e-11	2.42e-09
GO:0006915	apoptotic process	1190	578	471.26	2.33e-11	2.48e-09
GO:0008380	RNA splicing	278	164	110.09	3.17e-11	3.34e-09
GO:0007049	cell cycle	1149	559	455.02	3.75e-11	3.93e-09
GO:0046907	intracellular transport	1134	552	449.08	4.54e-11	4.73e-09
GO:0012501	programmed cell death	1207	583	477.99	6.18e-11	6.41e-09
GO:0016874	ligase activity	432	235	169.74	7.3e-11	7.52e-09
GO:0008219	cell death	1283	615	508.09	8.87e-11	9.02e-09
GO:0016265	death	1283	615	508.09	8.87e-11	9.02e-09
GO:0006396	RNA processing	641	332	253.84	9.09e-11	9.17e-09
GO:0030098	lymphocyte differentiation	246	147	97.42	9.12e-11	9.17e-09
GO:0000976	transcription regulatory region sequence...	384	212	150.88	1.09e-10	1.09e-08
GO:0000122	negative regulation of transcription fro...	493	264	195.23	1.13e-10	1.12e-08
GO:0048534	hematopoietic or lymphoid organ developm...	598	312	236.82	1.19e-10	1.17e-08
GO:0042110	T cell activation	301	173	119.2	1.73e-10	1.7e-08
GO:0010941	regulation of cell death	1000	490	396.01	1.94e-10	1.89e-08
GO:0051603	proteolysis involved in cellular protein...	491	262	194.44	2.14e-10	2.08e-08
GO:0006886	intracellular protein transport	630	325	249.49	2.65e-10	2.56e-08
GO:0002520	immune system development	633	326	250.68	3.19e-10	3.06e-08
GO:0012505	endomembrane system	1262	604	501.25	3.42e-10	3.27e-08
GO:0032549	ribonucleoside binding	1458	682	572.89	3.59e-10	3.4e-08
GO:0035639	purine ribonucleoside triphosphate bindi...	1449	678	569.35	3.82e-10	3.6e-08
GO:0051726	regulation of cell cycle	681	347	269.69	4.31e-10	4.04e-08
GO:0001882	nucleoside binding	1462	683	574.46	4.6e-10	4.29e-08
GO:0002521	leukocyte differentiation	365	202	144.55	4.94e-10	4.59e-08
GO:0001228	RNA polymerase II transcription regulato...	185	114	72.69	5.36e-10	4.94e-08
GO:0030217	T cell differentiation	176	110	69.7	5.5e-10	5.05e-08
GO:0003712	transcription cofactor activity	317	178	124.56	5.9e-10	5.38e-08
GO:0032550	purine ribonucleoside binding	1455	679	571.71	6.61e-10	6e-08
GO:0003682	chromatin binding	350	193	137.52	8.6e-10	7.73e-08
GO:0017076	purine nucleotide binding	1478	688	580.75	8.59e-10	7.73e-08
GO:0001883	purine nucleoside binding	1457	679	572.5	8.89e-10	7.94e-08
GO:0016607	nuclear speck	165	104	65.54	9.88e-10	8.78e-08
GO:0042393	histone binding	141	91	55.4	9.94e-10	8.79e-08
GO:0010608	posttranscriptional regulation of gene e...	441	236	174.64	1.22e-09	1.07e-07
GO:0000981	sequence-specific DNA binding RNA polyme...	341	188	133.99	1.46e-09	1.27e-07
GO:0030097	hemopoiesis	571	295	226.12	1.51e-09	1.32e-07
GO:0045595	regulation of cell differentiation	966	470	382.55	1.66e-09	1.44e-07
GO:0032555	purine ribonucleotide binding	1471	683	578	1.73e-09	1.49e-07
GO:0032553	ribonucleotide binding	1483	688	582.71	1.77e-09	1.52e-07
GO:0042981	regulation of apoptotic process	930	454	368.29	1.85e-09	1.58e-07
GO:0051641	cellular localization	1839	843	728.27	1.94e-09	1.65e-07
GO:0044257	cellular protein catabolic process	506	265	200.38	1.96e-09	1.65e-07
GO:0046649	lymphocyte activation	432	231	171.08	2.02e-09	1.7e-07
GO:0030163	protein catabolic process	599	307	237.21	2.1e-09	1.76e-07
GO:0035770	ribonucleoprotein granule	98	68	38.92	2.36e-09	1.96e-07
GO:0043067	regulation of programmed cell death	942	458	373.04	3.09e-09	2.56e-07
GO:0030154	cell differentiation	2180	983	863.31	4.55e-09	3.75e-07
GO:0051247	positive regulation of protein metabolic...	796	393	315.23	4.66e-09	3.82e-07
GO:0001012	RNA polymerase II regulatory region DNA ...	343	187	134.77	5.21e-09	4.25e-07
GO:0000375	RNA splicing, via transesterification re...	169	104	66.93	5.55e-09	4.51e-07
GO:0045596	negative regulation of cell differentiat...	382	206	151.28	6.18e-09	4.99e-07
GO:0005681	spliceosomal complex	159	99	63.15	6.4e-09	5.12e-07
GO:0031399	regulation of protein modification proce...	914	444	361.96	6.37e-09	5.12e-07
GO:0000377	RNA splicing, via transesterification re...	168	103	66.53	8.75e-09	6.94e-07
GO:0000398	mRNA splicing, via spliceosome	168	103	66.53	8.75e-09	6.94e-07
GO:0005829	cytosol	1416	661	562.42	8.83e-09	6.97e-07
GO:0032269	negative regulation of cellular protein ...	418	222	165.53	9e-09	7.07e-07
GO:0050684	regulation of mRNA processing	82	58	32.47	1.02e-08	7.95e-07
GO:0000977	RNA polymerase II regulatory region sequ...	339	184	133.2	1.08e-08	8.44e-07
GO:0009968	negative regulation of signal transducti...	640	322	253.45	1.09e-08	8.46e-07
GO:0043228	non-membrane-bounded organelle	2925	1290	1161.77	1.6e-08	1.23e-06
GO:0043232	intracellular non-membrane-bounded organ...	2925	1290	1161.77	1.6e-08	1.23e-06
GO:0006479	protein methylation	132	84	52.27	1.78e-08	1.35e-06
GO:0008213	protein alkylation	132	84	52.27	1.78e-08	1.35e-06
GO:0051248	negative regulation of protein metabolic...	467	243	184.94	1.97e-08	1.49e-06
GO:0051716	cellular response to stimulus	3760	1626	1489.01	2e-08	1.51e-06
GO:0016571	histone methylation	100	67	39.6	2.48e-08	1.86e-06
GO:0006417	regulation of translation	226	130	89.5	3e-08	2.25e-06
GO:0023057	negative regulation of signaling	663	330	262.56	3.03e-08	2.26e-06
GO:0010648	negative regulation of cell communicatio...	666	331	263.75	3.51e-08	2.6e-06
GO:0097190	apoptotic signaling pathway	439	229	173.85	3.89e-08	2.86e-06
GO:0032270	positive regulation of cellular protein ...	717	353	283.94	4.4e-08	3.23e-06
GO:0034976	response to endoplasmic reticulum stress	128	81	50.69	4.59e-08	3.36e-06
GO:0048869	cellular developmental process	2369	1052	938.16	5.86e-08	4.26e-06
GO:0065003	macromolecular complex assembly	1080	510	427.69	5.88e-08	4.26e-06
GO:0032502	developmental process	3389	1470	1342.09	6.54e-08	4.72e-06
GO:0043414	macromolecule methylation	206	119	81.58	8.3e-08	5.97e-06
GO:0051649	establishment of localization in cell	1521	696	602.34	1e-07	7.19e-06
GO:0009790	embryo development	615	306	243.55	1.03e-07	7.34e-06
GO:0001701	in utero embryonic development	276	152	109.3	1.06e-07	7.55e-06
GO:0009966	regulation of signal transduction	1558	711	616.99	1.2e-07	8.47e-06
GO:0001775	cell activation	571	286	226.12	1.27e-07	8.93e-06
GO:0050793	regulation of developmental process	1322	611	523.53	1.28e-07	8.96e-06
GO:0001047	core promoter binding	125	78	49.12	1.32e-07	9.19e-06
GO:0051093	negative regulation of developmental pro...	473	242	187.31	1.36e-07	9.42e-06
GO:0010646	regulation of cell communication	1756	793	695.4	1.66e-07	1.15e-05
GO:0043933	macromolecular complex subunit organizat...	1291	597	511.25	1.66e-07	1.15e-05
GO:0006913	nucleocytoplasmic transport	353	187	139.79	1.71e-07	1.17e-05
GO:0051169	nuclear transport	356	188	140.98	2.12e-07	1.45e-05
GO:0003729	mRNA binding	130	80	51.08	2.15e-07	1.46e-05
GO:0044389	small conjugating protein ligase binding	229	128	89.98	2.16e-07	1.47e-05
GO:0031625	ubiquitin protein ligase binding	225	126	88.41	2.33e-07	1.58e-05
GO:0005524	ATP binding	1173	542	460.9	2.42e-07	1.63e-05
GO:0019904	protein domain specific binding	470	238	184.68	2.43e-07	1.63e-05
GO:0044085	cellular component biogenesis	1726	779	683.52	2.47e-07	1.65e-05
GO:0044767	single-organism developmental process	2882	1257	1141.31	2.53e-07	1.68e-05
GO:0043009	chordate embryonic development	405	210	160.39	2.58e-07	1.71e-05
GO:0000151	ubiquitin ligase complex	205	117	81.42	3.12e-07	2.05e-05
GO:0010498	proteasomal protein catabolic process	286	155	113.26	3.11e-07	2.05e-05
GO:0030554	adenyl nucleotide binding	1198	551	470.73	3.99e-07	2.61e-05
GO:0005794	Golgi apparatus	893	425	354.69	4.25e-07	2.77e-05
GO:0034968	histone lysine methylation	84	56	33.27	4.46e-07	2.9e-05
GO:0023051	regulation of signaling	1741	783	689.46	4.58e-07	2.96e-05
GO:0018205	peptidyl-lysine modification	190	109	75.24	4.64e-07	2.99e-05
GO:1902275	regulation of chromatin organization	115	72	45.54	4.67e-07	3e-05
GO:0071702	organic substance transport	1560	707	617.78	4.8e-07	3.07e-05
GO:0044444	cytoplasmic part	5080	2148	2017.71	4.9e-07	3.12e-05
GO:0034708	methyltransferase complex	86	57	34.16	5.34e-07	3.39e-05
GO:0006468	protein phosphorylation	1028	481	407.1	5.82e-07	3.67e-05
GO:0019827	stem cell maintenance	94	61	37.23	5.81e-07	3.67e-05
GO:0080135	regulation of cellular response to stres...	382	198	151.28	5.87e-07	3.68e-05
GO:0001076	RNA polymerase II transcription factor b...	85	56	33.4	5.99e-07	3.74e-05
GO:0008287	protein serine/threonine phosphatase com...	41	32	16.28	6.3e-07	3.91e-05
GO:0009792	embryo development ending in birth or eg...	411	211	162.76	6.28e-07	3.91e-05
GO:0032559	adenyl ribonucleotide binding	1192	547	468.37	6.31e-07	3.91e-05
GO:0022402	cell cycle process	822	392	325.52	6.58e-07	4.06e-05
GO:0031056	regulation of histone modification	104	66	41.19	6.84e-07	4.2e-05
GO:0010494	cytoplasmic stress granule	28	24	11.12	6.96e-07	4.26e-05
GO:0007275	multicellular organismal development	2862	1244	1133.39	7.39e-07	4.51e-05
GO:0016310	phosphorylation	1279	587	506.5	7.51e-07	4.56e-05
GO:0018105	peptidyl-serine phosphorylation	181	104	71.68	7.63e-07	4.62e-05
GO:0043161	proteasomal ubiquitin-dependent protein ...	257	140	101.78	7.8e-07	4.7e-05
GO:0048585	negative regulation of response to stimu...	775	371	306.91	8.32e-07	5e-05
GO:0019220	regulation of phosphate metabolic proces...	1235	568	489.08	8.38e-07	5e-05
GO:0035097	histone methyltransferase complex	68	47	27.01	8.38e-07	5e-05
GO:0030099	myeloid cell differentiation	264	143	104.55	9.21e-07	5.47e-05
GO:0022613	ribonucleoprotein complex biogenesis	340	178	134.64	9.39e-07	5.56e-05
GO:0045321	leukocyte activation	500	250	198.01	9.55e-07	5.64e-05
GO:0097193	intrinsic apoptotic signaling pathway	211	118	83.56	9.79e-07	5.76e-05
GO:0007243	intracellular protein kinase cascade	737	354	291.86	1e-06	5.88e-05
GO:0051174	regulation of phosphorus metabolic proce...	1239	569	490.66	1.03e-06	6.04e-05
GO:0070646	protein modification by small protein re...	101	64	40	1.09e-06	6.33e-05
GO:0000209	protein polyubiquitination	145	86	57.42	1.12e-06	6.48e-05
GO:0042787	protein ubiquitination involved in ubiqu...	109	68	43.17	1.17e-06	6.76e-05
GO:0070887	cellular response to chemical stimulus	1387	631	549.27	1.2e-06	6.9e-05
GO:0000785	chromatin	369	191	146.56	1.32e-06	7.61e-05
GO:0033077	T cell differentiation in thymus	67	46	26.53	1.34e-06	7.66e-05
GO:0006796	phosphate-containing compound metabolic ...	2212	974	875.98	1.44e-06	8.19e-05
GO:0048856	anatomical structure development	3045	1315	1205.86	1.63e-06	9.26e-05
GO:0006402	mRNA catabolic process	98	62	38.81	1.73e-06	9.79e-05
GO:0000978	RNA polymerase II core promoter proximal...	206	114	80.94	1.91e-06	0.000107953
GO:0018209	peptidyl-serine modification	192	108	76.03	1.92e-06	0.000108172
GO:2001233	regulation of apoptotic signaling pathwa...	284	151	112.47	1.97e-06	0.000110288
GO:0019900	kinase binding	462	230	181.53	2.01e-06	0.000112608
GO:0000956	nuclear-transcribed mRNA catabolic proce...	81	53	32.08	2.17e-06	0.000121083
GO:0000987	core promoter proximal region sequence-s...	215	118	84.48	2.22e-06	0.000122684
GO:0001159	core promoter proximal region DNA bindin...	215	118	84.48	2.22e-06	0.000122684
GO:0000139	Golgi membrane	389	199	154.51	2.26e-06	0.000124987
GO:0033365	protein localization to organelle	491	244	194.44	2.35e-06	0.000129083
GO:0033044	regulation of chromosome organization	176	100	69.7	2.48e-06	0.000136174
GO:0044431	Golgi apparatus part	443	223	175.95	2.57e-06	0.000140302
GO:0001077	RNA polymerase II core promoter proximal...	138	81	54.22	2.82e-06	0.000153599
GO:0043543	protein acylation	189	106	74.85	2.87e-06	0.000155817
GO:0051020	GTPase binding	214	117	84.09	3.14e-06	0.000170187
GO:0006793	phosphorus metabolic process	2240	982	887.07	3.23e-06	0.000174412
GO:0035966	response to topologically incorrect prot...	78	51	30.89	3.48e-06	0.000187088
GO:0043484	regulation of RNA splicing	80	52	31.68	3.64e-06	0.000195027
GO:0071310	cellular response to organic substance	1124	516	445.12	3.7e-06	0.000197682
GO:0022607	cellular component assembly	1545	693	611.84	3.83e-06	0.000203859
GO:0031060	regulation of histone methylation	52	37	20.59	3.87e-06	0.000205426
GO:0051028	mRNA transport	84	54	33.27	3.92e-06	0.000207726
GO:0031400	negative regulation of protein modificat...	313	163	123.95	4.02e-06	0.000212402
GO:0006413	translational initiation	90	57	35.64	4.27e-06	0.000224272
GO:0032943	mononuclear cell proliferation	186	104	73.66	4.28e-06	0.000224272
GO:0046651	lymphocyte proliferation	184	103	72.87	4.43e-06	0.000231545
GO:0033043	regulation of organelle organization	675	323	267.31	4.6e-06	0.000239718
GO:0005768	endosome	523	257	207.73	5.03e-06	0.00026145
GO:0048513	organ development	1918	847	759.55	5.1e-06	0.000263991
GO:0007165	signal transduction	2870	1238	1136.56	5.16e-06	0.000266634
GO:2001234	negative regulation of apoptotic signali...	145	84	57.42	5.53e-06	0.000284685
GO:0018394	peptidyl-lysine acetylation	141	82	55.84	5.79e-06	0.000297316
GO:0065009	regulation of molecular function	1729	768	684.71	5.85e-06	0.000299365
GO:0018393	internal peptidyl-lysine acetylation	137	80	54.25	6.05e-06	0.000308636
GO:0048024	regulation of mRNA splicing, via spliceo...	49	35	19.4	6.15e-06	0.000312757
GO:0031090	organelle membrane	2004	884	795.96	6.5e-06	0.000329693
GO:0008270	zinc ion binding	820	382	322.2	6.59e-06	0.000333286
GO:0009894	regulation of catabolic process	803	377	318	7.17e-06	0.000361343
GO:0071013	catalytic step 2 spliceosome	85	54	33.76	7.36e-06	0.0003697
GO:0003713	transcription coactivator activity	189	104	74.26	7.46e-06	0.000373738
GO:0031519	PcG protein complex	42	31	16.68	7.49e-06	0.000374404
GO:0001046	core promoter sequence-specific DNA bind...	78	50	30.65	7.75e-06	0.000386037
GO:0006475	internal protein amino acid acetylation	142	82	56.23	8.43e-06	0.000418488
GO:0006986	response to unfolded protein	70	46	27.72	8.51e-06	0.000420668
GO:0031401	positive regulation of protein modificat...	596	287	236.02	8.52e-06	0.000420668
GO:0017016	Ras GTPase binding	181	100	71.12	8.81e-06	0.000433578
GO:0001104	RNA polymerase II transcription cofactor...	61	41	23.97	9.11e-06	0.00044709
GO:0016573	histone acetylation	134	78	53.07	9.26e-06	0.000453475
GO:0000982	RNA polymerase II core promoter proximal...	207	112	81.34	9.62e-06	0.000469494
GO:0019901	protein kinase binding	411	204	161.49	9.71e-06	0.000472357
GO:0001071	nucleic acid binding transcription facto...	634	301	249.12	1.04e-05	0.000505357
GO:0003700	sequence-specific DNA binding transcript...	634	301	249.12	1.04e-05	0.000505357
GO:0000932	cytoplasmic mRNA processing body	57	39	22.64	1.05e-05	0.000508887
GO:0031098	stress-activated protein kinase signalin...	172	96	68.11	1.09e-05	0.00052491
GO:0010564	regulation of cell cycle process	411	205	162.76	1.11e-05	0.000531453
GO:0032403	protein complex binding	412	204	161.89	1.18e-05	0.000564772
GO:0045637	regulation of myeloid cell differentiati...	145	83	57.42	1.18e-05	0.000564772
GO:0019003	GDP binding	43	31	16.9	1.29e-05	0.000612807
GO:0070661	leukocyte proliferation	194	106	76.83	1.39e-05	0.000658225
GO:0046332	SMAD binding	58	39	22.79	1.48e-05	0.00070035
GO:0042326	negative regulation of phosphorylation	233	124	92.27	1.49e-05	0.000703511
GO:1902105	regulation of leukocyte differentiation	190	104	75.24	1.5e-05	0.000707748
GO:0060548	negative regulation of cell death	490	239	194.05	1.62e-05	0.000761279
GO:0006997	nucleus organization	77	49	30.49	1.64e-05	0.000768532
GO:2001242	regulation of intrinsic apoptotic signal...	109	65	43.17	1.73e-05	0.000808712
GO:0030055	cell-substrate junction	334	170	132.66	1.77e-05	0.000823279
GO:0032259	methylation	262	137	103.76	1.77e-05	0.000823279
GO:0031267	small GTPase binding	192	104	75.44	1.85e-05	0.000857579
GO:0042325	regulation of phosphorylation	768	359	304.14	1.92e-05	0.000886435
GO:0005924	cell-substrate adherens junction	330	168	131.07	1.95e-05	0.000896646
GO:0005925	focal adhesion	330	168	131.07	1.95e-05	0.000896646
GO:0048583	regulation of response to stimulus	2078	907	822.92	1.97e-05	0.000900564
GO:0048731	system development	2556	1103	1012.21	1.99e-05	0.000909053
GO:0005769	early endosome	212	114	84.2	2.07e-05	0.000941014
GO:0045638	negative regulation of myeloid cell diff...	62	41	24.55	2.08e-05	0.000944851
GO:0050863	regulation of T cell activation	187	102	74.05	2.2e-05	0.000997121
GO:0006605	protein targeting	354	178	140.19	2.3e-05	0.00103973
GO:0022618	ribonucleoprotein complex assembly	168	93	66.53	2.31e-05	0.00104187
GO:0050870	positive regulation of T cell activation	122	71	48.31	2.32e-05	0.0010424
GO:0048864	stem cell development	183	100	72.47	2.39e-05	0.00106818
GO:2000026	regulation of multicellular organismal d...	1014	463	401.56	2.39e-05	0.00106818
GO:0006412	translation	513	248	203.16	2.49e-05	0.00110777
GO:0010033	response to organic substance	1578	699	624.91	2.58e-05	0.00114623
GO:0050657	nucleic acid transport	106	63	41.98	2.69e-05	0.00118595
GO:0050658	RNA transport	106	63	41.98	2.69e-05	0.00118595
GO:0051236	establishment of RNA localization	106	63	41.98	2.69e-05	0.00118595
GO:0048863	stem cell differentiation	218	116	86.33	2.8e-05	0.00123201
GO:0046631	alpha-beta T cell activation	94	57	37.23	2.84e-05	0.00124725
GO:0050851	antigen receptor-mediated signaling path...	90	55	35.64	2.86e-05	0.00124935
GO:0031329	regulation of cellular catabolic process	729	341	288.69	2.91e-05	0.00127169
GO:0008284	positive regulation of cell proliferatio...	482	234	190.88	2.95e-05	0.0012851
GO:0043167	ion binding	4166	1740	1636.94	3.05e-05	0.00132235
GO:0007154	cell communication	3208	1366	1270.41	3.06e-05	0.00132626
GO:0035967	cellular response to topologically incor...	57	38	22.57	3.16e-05	0.00136184
GO:0051251	positive regulation of lymphocyte activa...	169	93	66.93	3.16e-05	0.00136184
GO:0070936	protein K48-linked ubiquitination	44	31	17.42	3.26e-05	0.0014001
GO:0042221	response to chemical stimulus	2028	884	803.12	3.27e-05	0.00140245
GO:0051052	regulation of DNA metabolic process	247	129	97.82	3.32e-05	0.00142005
GO:0010563	negative regulation of phosphorus metabo...	256	133	101.38	3.51e-05	0.0014882
GO:0045936	negative regulation of phosphate metabol...	256	133	101.38	3.51e-05	0.0014882
GO:0046914	transition metal ion binding	958	435	376.42	3.49e-05	0.0014882
GO:0050852	T cell receptor signaling pathway	61	40	24.16	3.53e-05	0.00149209
GO:0008283	cell proliferation	1129	510	447.1	3.61e-05	0.00152563
GO:0006401	RNA catabolic process	115	67	45.54	3.72e-05	0.00156466
GO:0051128	regulation of cellular component organiz...	1368	610	541.75	3.72e-05	0.00156466
GO:0034622	cellular macromolecular complex assembly	624	295	247.11	3.85e-05	0.00161183
GO:0043069	negative regulation of programmed cell d...	445	217	176.23	4.02e-05	0.0016821
GO:0046632	alpha-beta T cell differentiation	71	45	28.12	4.18e-05	0.00174357
GO:0044427	chromosomal part	660	311	262.14	4.29e-05	0.00178424
GO:0042098	T cell proliferation	132	75	52.27	4.32e-05	0.00178488
GO:0043066	negative regulation of apoptotic process	434	212	171.87	4.31e-05	0.00178488
GO:0070603	SWI/SNF superfamily-type complex	67	43	26.61	4.31e-05	0.00178488
GO:0033135	regulation of peptidyl-serine phosphoryl...	75	47	29.7	4.34e-05	0.00178645
GO:0006338	chromatin remodeling	93	56	36.83	4.42e-05	0.00181264
GO:0051427	hormone receptor binding	110	64	43.22	4.42e-05	0.00181264
GO:0044700	single organism signaling	3122	1329	1236.36	4.47e-05	0.00182919
GO:0044248	cellular catabolic process	1531	677	606.3	4.57e-05	0.00186578
GO:0015931	nucleobase-containing compound transport	128	73	50.69	4.59e-05	0.00186655
GO:0048584	positive regulation of response to stimu...	1048	475	415.02	4.6e-05	0.00186655
GO:0023052	signaling	3125	1330	1237.54	4.65e-05	0.00188177
GO:0001932	regulation of protein phosphorylation	700	327	277.21	4.85e-05	0.00195877
GO:0048193	Golgi vesicle transport	179	97	70.89	4.88e-05	0.00196871
GO:0035257	nuclear hormone receptor binding	100	59	39.29	4.96e-05	0.00199312
GO:0006473	protein acetylation	162	89	64.15	5.03e-05	0.00201951
GO:0071214	cellular response to abiotic stimulus	177	96	70.09	5.1e-05	0.00203912
GO:0051234	establishment of localization	2755	1179	1091.02	5.28e-05	0.00210726
GO:0071826	ribonucleoprotein complex subunit organi...	175	95	69.3	5.31e-05	0.00211679
GO:0001933	negative regulation of protein phosphory...	225	118	89.1	5.59e-05	0.00221917
GO:0006984	ER-nucleus signaling pathway	62	40	24.55	6.15e-05	0.00243832
GO:0072594	establishment of protein localization to...	314	158	124.35	6.21e-05	0.00245559
GO:0034504	protein localization to nucleus	243	126	96.23	6.25e-05	0.00246534
GO:0003714	transcription corepressor activity	111	64	43.61	6.46e-05	0.00254283
GO:0007264	small GTPase mediated signal transductio...	375	185	148.51	6.52e-05	0.00256128
GO:0004386	helicase activity	132	74	51.87	6.57e-05	0.0025725
GO:0006461	protein complex assembly	822	378	325.52	6.76e-05	0.00263672
GO:0071478	cellular response to radiation	94	56	37.23	6.75e-05	0.00263672
GO:0030139	endocytic vesicle	102	60	40.51	7.01e-05	0.00272616
GO:0009791	post-embryonic development	76	47	30.1	7.02e-05	0.00272714
GO:0016579	protein deubiquitination	84	51	33.27	7.05e-05	0.00273081
GO:0006950	response to stress	2208	954	874.4	7.19e-05	0.00277779
GO:0016197	endosomal transport	189	101	74.85	7.21e-05	0.0027816
GO:0000288	nuclear-transcribed mRNA catabolic proce...	36	26	14.26	7.26e-05	0.00279438
GO:0006403	RNA localization	119	68	47.13	7.59e-05	0.00290442
GO:0010647	positive regulation of cell communicatio...	830	381	328.69	7.6e-05	0.00290442
GO:0071495	cellular response to endogenous stimulus	566	268	224.14	7.58e-05	0.00290442
GO:0051568	histone H3-K4 methylation	49	33	19.4	7.68e-05	0.00291962
GO:0070271	protein complex biogenesis	823	378	325.92	7.66e-05	0.00291962
GO:0042470	melanosome	82	50	32.57	7.74e-05	0.00292888
GO:0048770	pigment granule	82	50	32.57	7.74e-05	0.00292888
GO:1902107	positive regulation of leukocyte differe...	113	65	44.75	8.26e-05	0.00312121
GO:0016574	histone ubiquitination	38	27	15.05	8.37e-05	0.00315622
GO:0015095	magnesium ion transmembrane transporter ...	10	10	3.93	8.72e-05	0.00328052
GO:0006810	transport	2654	1135	1051.02	8.88e-05	0.00333108
GO:0019783	small conjugating protein-specific prote...	73	45	28.68	8.95e-05	0.00333471
GO:0031072	heat shock protein binding	75	46	29.47	8.94e-05	0.00333471
GO:0048872	homeostasis of number of cells	205	108	81.18	8.92e-05	0.00333471
GO:0000790	nuclear chromatin	244	126	96.91	9.26e-05	0.00344357
GO:0006275	regulation of DNA replication	103	60	40.79	9.36e-05	0.00347217
GO:0005643	nuclear pore	55	36	21.85	9.82e-05	0.00363517
GO:0090150	establishment of protein localization to...	160	87	63.36	9.97e-05	0.00368437
GO:0051130	positive regulation of cellular componen...	654	305	258.99	0.000101221	0.00373213
GO:0018210	peptidyl-threonine modification	67	42	26.53	0.000108243	0.00397827
GO:0030522	intracellular receptor signaling pathway	156	85	61.78	0.000108368	0.00397827
GO:0031123	RNA 3'-end processing	77	47	30.49	0.000111471	0.00408331
GO:0009967	positive regulation of signal transducti...	779	358	308.49	0.000112347	0.00410651
GO:0010638	positive regulation of organelle organiz...	299	150	118.41	0.000113632	0.00414449
GO:0005694	chromosome	735	340	291.93	0.000118342	0.004307
GO:0023056	positive regulation of signaling	820	375	324.73	0.000126264	0.00458542
GO:0002039	p53 binding	54	35	21.22	0.000127606	0.00461779
GO:0051403	stress-activated MAPK cascade	148	81	58.61	0.000127702	0.00461779
GO:0043065	positive regulation of apoptotic process	284	143	112.47	0.000130602	0.00470252
GO:0061061	muscle structure development	347	171	137.42	0.000130524	0.00470252
GO:0034644	cellular response to UV	48	32	19.01	0.000132513	0.00476117
GO:0000278	mitotic cell cycle	642	299	254.24	0.000133193	0.00477376
GO:0042113	B cell activation	161	87	63.76	0.000133429	0.00477376
GO:0000380	alternative mRNA splicing, via spliceoso...	35	25	13.86	0.000134284	0.00479421
GO:0002429	immune response-activating cell surface ...	102	59	40.39	0.00013995	0.00496443
GO:0034620	cellular response to unfolded protein	50	33	19.8	0.000140228	0.00496443
GO:0035326	enhancer binding	62	39	24.36	0.000139883	0.00496443
GO:0050896	response to stimulus	4671	1945	1849.78	0.000139726	0.00496443
GO:0043168	anion binding	1951	839	766.6	0.000144647	0.00511014
GO:0051249	regulation of lymphocyte activation	260	132	102.96	0.000146672	0.00517087
GO:0042127	regulation of cell proliferation	909	412	359.98	0.000150448	0.00528195
GO:0071453	cellular response to oxygen levels	96	56	38.02	0.000150292	0.00528195
GO:0002706	regulation of lymphocyte mediated immuni...	92	54	36.43	0.000156739	0.00549139
GO:0005912	adherens junction	372	182	147.75	0.00015889	0.00554374
GO:0031124	mRNA 3'-end processing	56	36	22.18	0.0001586	0.00554374
GO:0036294	cellular response to decreased oxygen le...	90	53	35.64	0.000159765	0.00556278
GO:0016740	transferase activity	1425	623	559.92	0.000161417	0.00560873
GO:0009896	positive regulation of catabolic process	203	106	80.39	0.000162726	0.00564263
GO:0045335	phagocytic vesicle	54	35	21.45	0.000164309	0.00568585
GO:0006446	regulation of translational initiation	60	38	23.76	0.000166947	0.00576532
GO:0001892	embryonic placenta development	62	39	24.55	0.000170024	0.00585957
GO:0043489	RNA stabilization	23	18	9.11	0.000183393	0.00629462
GO:0048255	mRNA stabilization	23	18	9.11	0.000183393	0.00629462
GO:0043487	regulation of RNA stability	41	28	16.24	0.000185755	0.00636278
GO:0070536	protein K63-linked deubiquitination	18	15	7.13	0.000186261	0.00636717
GO:0046930	pore complex	68	42	27.01	0.000189409	0.00646173
GO:0010627	regulation of intracellular protein kina...	652	302	258.2	0.000198646	0.00676317
GO:0070848	response to growth factor stimulus	311	154	123.16	0.000207054	0.00703526
GO:0071822	protein complex subunit organization	1000	449	396.01	0.000210342	0.00713261
GO:0010942	positive regulation of cell death	318	157	125.93	0.000216165	0.00731539
GO:0001158	enhancer sequence-specific DNA binding	55	35	21.61	0.000218906	0.00739332
GO:0048468	cell development	1235	547	489.08	0.000221977	0.00748209
GO:0044093	positive regulation of molecular functio...	1101	491	436.01	0.000226762	0.00762814
GO:0043068	positive regulation of programmed cell d...	289	144	114.45	0.000229714	0.00771209
GO:0046982	protein heterodimerization activity	339	165	133.2	0.00023545	0.00788897
GO:0006513	protein monoubiquitination	49	32	19.4	0.000237453	0.00790901
GO:0016577	histone demethylation	25	19	9.9	0.000237256	0.00790901
GO:0030968	endoplasmic reticulum unfolded protein r...	49	32	19.4	0.000237453	0.00790901
GO:0050790	regulation of catalytic activity	1395	613	552.44	0.000246634	0.00819119
GO:0071456	cellular response to hypoxia	87	51	34.45	0.000246895	0.00819119
GO:0043254	regulation of protein complex assembly	258	130	102.17	0.000248856	0.00824006
GO:0044454	nuclear chromosome part	386	187	153.31	0.000251435	0.00830918
GO:0035098	ESC/E(Z) complex	15	13	5.96	0.000254513	0.00839335
GO:0070059	intrinsic apoptotic signaling pathway in...	53	34	20.99	0.000254977	0.00839335
GO:0043566	structure-specific DNA binding	222	113	87.23	0.000263751	0.00866528
GO:0070997	neuron death	194	101	76.83	0.000264615	0.0086768
GO:0030183	B cell differentiation	77	46	30.49	0.000268511	0.00878749
GO:0017148	negative regulation of translation	71	43	28.12	0.000276212	0.00902191
GO:0018107	peptidyl-threonine phosphorylation	63	39	24.95	0.000276742	0.00902191
GO:0030532	small nuclear ribonucleoprotein complex	55	35	21.85	0.00028007	0.00910579
GO:0044707	single-multicellular organism process	3593	1508	1422.88	0.000280394	0.00910579
GO:0061418	regulation of transcription from RNA pol...	12	11	4.75	0.00028537	0.0092496
GO:0006457	protein folding	138	75	54.65	0.000297864	0.00963606
GO:0070482	response to oxygen levels	221	113	87.52	0.000299484	0.00966995
GO:0010501	RNA secondary structure unwinding	38	26	15.05	0.000301022	0.00970106
GO:0001190	RNA polymerase II transcription factor b...	29	21	11.39	0.000304207	0.00978505
GO:0072657	protein localization to membrane	230	117	91.08	0.000307591	0.00987507
GO:0043021	ribonucleoprotein complex binding	82	48	32.22	0.000314855	0.0100891
GO:0043488	regulation of mRNA stability	40	27	15.84	0.000325387	0.0104068
GO:0001085	RNA polymerase II transcription factor b...	78	46	30.65	0.000329583	0.0105211
GO:0032386	regulation of intracellular transport	309	152	122.37	0.000334516	0.0106584
GO:0002696	positive regulation of leukocyte activat...	184	96	72.87	0.000336191	0.0106916
GO:0000082	G1/S transition of mitotic cell cycle	132	72	52.27	0.000337765	0.0107014
GO:0051329	interphase of mitotic cell cycle	132	72	52.27	0.000337765	0.0107014
GO:0000228	nuclear chromosome	413	198	164.04	0.000340755	0.0107759
GO:0006508	proteolysis	786	357	311.27	0.00034533	0.0109002
GO:0016192	vesicle-mediated transport	824	373	326.32	0.000349289	0.0110046
GO:0045619	regulation of lymphocyte differentiation	113	63	44.75	0.00035218	0.011075
GO:0030670	phagocytic vesicle membrane	29	21	11.52	0.000362492	0.0113781
GO:0032944	regulation of mononuclear cell prolifera...	143	77	56.63	0.000365193	0.0114233
GO:0051168	nuclear export	111	62	43.96	0.000365286	0.0114233
GO:0004674	protein serine/threonine kinase activity	353	170	138.7	0.000368517	0.011503
GO:0051098	regulation of binding	202	104	79.99	0.000369794	0.0115216
GO:0050670	regulation of lymphocyte proliferation	141	76	55.84	0.000381551	0.0118508
GO:0051179	localization	3402	1429	1347.24	0.000381762	0.0118508
GO:0051865	protein autoubiquitination	46	30	18.22	0.000383698	0.011889
GO:0050867	positive regulation of cell activation	189	98	74.85	0.000390211	0.0120687
GO:0042129	regulation of T cell proliferation	107	60	42.37	0.000392425	0.0121149
GO:0005525	GTP binding	303	148	119.06	0.000395424	0.0121853
GO:0005783	endoplasmic reticulum	1001	448	397.58	0.000403339	0.0124065
GO:0030518	intracellular steroid hormone receptor s...	78	46	30.89	0.000405154	0.0124397
GO:0032451	demethylase activity	24	18	9.43	0.000412033	0.0126279
GO:0051325	interphase	137	74	54.25	0.000416305	0.0127358
GO:0070161	anchoring junction	380	183	150.93	0.000425302	0.0129875
GO:0003730	mRNA 3'-UTR binding	35	24	13.75	0.000426497	0.0130005
GO:0017015	regulation of transforming growth factor...	58	36	22.97	0.000437481	0.013231
GO:0035710	CD4-positive, alpha-beta T cell activati...	58	36	22.97	0.000437481	0.013231
GO:0042100	B cell proliferation	58	36	22.97	0.000437481	0.013231
GO:0045727	positive regulation of translation	66	40	26.14	0.000437429	0.013231
GO:0097285	cell-type specific apoptotic process	315	154	124.74	0.000437978	0.013231
GO:0080134	regulation of response to stress	781	354	309.29	0.000439035	0.0132393
GO:0030512	negative regulation of transforming grow...	33	23	13.07	0.000444715	0.0133866
GO:0016044	cellular membrane organization	511	239	202.36	0.000454846	0.0136672
GO:0070076	histone lysine demethylation	24	18	9.5	0.000461423	0.0138402
GO:1901575	organic substance catabolic process	1550	674	613.82	0.000465108	0.013926
GO:0010008	endosome membrane	238	120	94.53	0.000468906	0.0140149
GO:0032501	multicellular organismal process	3699	1547	1464.86	0.000479714	0.0143126
GO:0034655	nucleobase-containing compound catabolic...	612	282	242.36	0.000484078	0.0144173
GO:0032880	regulation of protein localization	465	219	184.15	0.000486732	0.0144709
GO:0048538	thymus development	35	24	13.86	0.000488807	0.014507
GO:0034399	nuclear periphery	99	56	39.32	0.000491109	0.0145497
GO:0044440	endosomal part	245	123	97.31	0.000499006	0.0147578
GO:0022403	cell cycle phase	142	76	56.23	0.000505812	0.0149251
GO:0032452	histone demethylase activity	19	15	7.47	0.000506431	0.0149251
GO:0007259	JAK-STAT cascade	91	52	36.04	0.000510553	0.0150204
GO:0010741	negative regulation of intracellular pro...	177	92	70.09	0.00052143	0.0153137
GO:0071363	cellular response to growth factor stimu...	291	143	115.24	0.000522504	0.0153186
GO:0043085	positive regulation of catalytic activit...	911	408	360.77	0.000524705	0.0153565
GO:0061384	heart trabecula morphogenesis	14	12	5.54	0.000542354	0.0158456
GO:0002768	immune response-regulating cell surface ...	108	60	42.77	0.000545193	0.015901
GO:0061024	membrane organization	517	241	204.74	0.00054771	0.0159469
GO:0042054	histone methyltransferase activity	45	29	17.68	0.000552584	0.0160611
GO:0002762	negative regulation of myeloid leukocyte...	26	19	10.3	0.000553757	0.0160675
GO:0002761	regulation of myeloid leukocyte differen...	85	49	33.66	0.000556386	0.0161161
GO:0000242	pericentriolar material	14	12	5.56	0.000560094	0.0161957
GO:0002682	regulation of immune system process	788	356	312.06	0.00056531	0.0163186
GO:0004843	ubiquitin-specific protease activity	61	37	23.97	0.000582402	0.0167262
GO:0005667	transcription factor complex	199	102	79.04	0.000581683	0.0167262
GO:0035145	exon-exon junction complex	19	15	7.55	0.000580648	0.0167262
GO:0000123	histone acetyltransferase complex	87	50	34.56	0.000586761	0.0168228
GO:0035258	steroid hormone receptor binding	57	35	22.4	0.000589456	0.016844
GO:0042692	muscle cell differentiation	260	129	102.96	0.000590492	0.016844
GO:0044087	regulation of cellular component biogene...	464	218	183.75	0.000589686	0.016844
GO:0032627	interleukin-23 production	8	8	3.17	0.000602728	0.0170205
GO:0032667	regulation of interleukin-23 production	8	8	3.17	0.000602728	0.0170205
GO:0045059	positive thymic T cell selection	8	8	3.17	0.000602728	0.0170205
GO:0045136	development of secondary sexual characte...	8	8	3.17	0.000602728	0.0170205
GO:0046719	regulation by virus of viral protein lev...	8	8	3.17	0.000602728	0.0170205
GO:0051292	nuclear pore complex assembly	8	8	3.17	0.000602728	0.0170205
GO:1902115	regulation of organelle assembly	77	45	30.49	0.000614631	0.0173277
GO:0017160	Ral GTPase binding	11	10	4.32	0.000617174	0.0173704
GO:0032922	circadian regulation of gene expression	43	28	17.03	0.000620991	0.0174197
GO:0045859	regulation of protein kinase activity	469	220	185.73	0.000620426	0.0174197
GO:0042254	ribosome biogenesis	220	111	87.12	0.000639671	0.017914
GO:0050686	negative regulation of mRNA processing	28	20	11.09	0.000641283	0.0179294
GO:0040029	regulation of gene expression, epigeneti...	189	97	74.85	0.000657733	0.0183589
GO:0036293	response to decreased oxygen levels	209	106	82.77	0.000660856	0.0184156
GO:0002449	lymphocyte mediated immunity	143	76	56.63	0.00066532	0.0185095
GO:0005126	cytokine receptor binding	155	81	60.9	0.000672831	0.0186876
GO:0060284	regulation of cell development	556	257	220.18	0.000678139	0.0188042
GO:0043367	CD4-positive, alpha-beta T cell differen...	51	32	20.2	0.000685491	0.0189769
GO:2001243	negative regulation of intrinsic apoptot...	63	38	24.95	0.000688862	0.019039
GO:0090101	negative regulation of transmembrane rec...	53	33	20.99	0.00069269	0.0191135
GO:0016458	gene silencing	141	75	55.84	0.000696628	0.0191908
GO:0016055	Wnt receptor signaling pathway	225	113	89.1	0.000715029	0.0196656
GO:0019001	guanyl nucleotide binding	311	150	122.2	0.000730765	0.0200657
GO:0002699	positive regulation of immune effector p...	109	60	43.17	0.000749055	0.0205346
GO:0045597	positive regulation of cell differentiat...	438	206	173.45	0.000771337	0.0211111
GO:0006606	protein import into nucleus	192	98	76.03	0.000786858	0.0214469
GO:0007254	JNK cascade	122	66	48.31	0.000787417	0.0214469
GO:0044744	protein targeting to nucleus	192	98	76.03	0.000786858	0.0214469
GO:0031057	negative regulation of histone modificat...	32	22	12.67	0.000795631	0.0216358
GO:0001102	RNA polymerase II activating transcripti...	23	17	9.04	0.000797809	0.0216601
GO:0032872	regulation of stress-activated MAPK casc...	135	72	53.46	0.000799221	0.0216636
GO:1901214	regulation of neuron death	170	88	67.32	0.000807158	0.0218437
GO:0005789	endoplasmic reticulum membrane	582	268	231.16	0.000857412	0.0231666
GO:0000184	nuclear-transcribed mRNA catabolic proce...	34	23	13.46	0.000860825	0.0231846
GO:0000245	spliceosomal complex assembly	34	23	13.46	0.000860825	0.0231846
GO:0006974	response to DNA damage stimulus	572	263	226.52	0.000866897	0.0232505
GO:0016605	PML body	86	49	34.16	0.000865414	0.0232505
GO:0031490	chromatin DNA binding	66	39	25.93	0.000867401	0.0232505
GO:0002819	regulation of adaptive immune response	101	56	40	0.000876823	0.0234658
GO:0031965	nuclear membrane	212	107	84.2	0.000882787	0.023588
GO:0043368	positive T cell selection	23	17	9.11	0.000886647	0.0236537
GO:0001666	response to hypoxia	206	104	81.58	0.000906627	0.0241486
GO:0002573	myeloid leukocyte differentiation	142	75	56.23	0.000910228	0.0242063
GO:0016773	phosphotransferase activity, alcohol gro...	553	253	217.29	0.000914182	0.0242351
GO:0032561	guanyl ribonucleotide binding	310	149	121.81	0.00091396	0.0242351
GO:0043028	cysteine-type endopeptidase regulator ac...	25	18	9.82	0.000930917	0.0246401
GO:0045058	T cell selection	38	25	15.05	0.00096625	0.0255353
GO:0001503	ossification	222	111	87.92	0.000971491	0.0255937
GO:0009888	tissue development	1061	468	420.17	0.000971387	0.0255937
GO:0042176	regulation of protein catabolic process	231	115	91.48	0.000973815	0.0256028
GO:0097191	extrinsic apoptotic signaling pathway	173	89	68.51	0.000974869	0.0256028
GO:0043230	extracellular organelle	1910	820	758.63	0.000984938	0.0257871
GO:0065010	extracellular membrane-bounded organelle	1910	820	758.63	0.000984938	0.0257871
GO:0000910	cytokinesis	110	60	43.56	0.00101811	0.0266144
GO:0033673	negative regulation of kinase activity	171	88	67.72	0.00102403	0.0267276
GO:0070412	R-SMAD binding	18	14	7.07	0.00103068	0.0268597
GO:0018196	peptidyl-asparagine modification	25	18	9.9	0.00103786	0.0269635
GO:0019048	modulation by virus of host morphology o...	25	18	9.9	0.00103786	0.0269635
GO:0043507	positive regulation of JUN kinase activi...	42	27	16.63	0.00103991	0.0269754
GO:0042175	nuclear outer membrane-endoplasmic retic...	593	272	235.53	0.0010458	0.0270865
GO:0070302	regulation of stress-activated protein k...	136	72	53.86	0.00104752	0.0270896
GO:0045580	regulation of T cell differentiation	91	51	36.04	0.00105716	0.0272969
GO:0031058	positive regulation of histone modificat...	62	37	24.55	0.00106966	0.0275776
GO:0043549	regulation of kinase activity	508	235	201.18	0.00107316	0.0275835
GO:0070663	regulation of leukocyte proliferation	147	77	58.21	0.00107265	0.0275835
GO:0004672	protein kinase activity	460	213	180.75	0.00107769	0.0276579
GO:0001726	ruffle	125	67	49.65	0.00109964	0.0281785
GO:0002260	lymphocyte homeostasis	56	34	22.18	0.00110375	0.0281927
GO:0030433	ER-associated protein catabolic process	56	34	22.18	0.00110375	0.0281927
GO:0031047	gene silencing by RNA	50	31	19.8	0.00110687	0.0281927
GO:0090288	negative regulation of cellular response...	50	31	19.8	0.00110687	0.0281927
GO:0071482	cellular response to light stimulus	54	33	21.38	0.00110883	0.0282
GO:0033962	cytoplasmic mRNA processing body assembl...	18	14	7.13	0.00112945	0.0286383
GO:0061014	positive regulation of mRNA catabolic pr...	18	14	7.13	0.00112945	0.0286383
GO:0070062	extracellular vesicular exosome	1905	817	756.64	0.00115736	0.0293019
GO:0006482	protein demethylation	27	19	10.69	0.00117579	0.029591
GO:0008214	protein dealkylation	27	19	10.69	0.00117579	0.029591
GO:0031440	regulation of mRNA 3'-end processing	27	19	10.69	0.00117579	0.029591
GO:0043618	regulation of transcription from RNA pol...	27	19	10.69	0.00117579	0.029591
GO:0002684	positive regulation of immune system pro...	448	209	177.41	0.00118424	0.0297592
GO:0051239	regulation of multicellular organismal p...	1606	692	636	0.00120455	0.0302247
GO:0051170	nuclear import	194	98	76.83	0.00122327	0.0306489
GO:0090287	regulation of cellular response to growt...	100	55	39.6	0.00125229	0.0313296
GO:0001105	RNA polymerase II transcription coactiva...	20	15	7.86	0.00128813	0.0321309
GO:0016896	exoribonuclease activity, producing 5'-p...	20	15	7.86	0.00128813	0.0321309
GO:0043620	regulation of DNA-dependent transcriptio...	29	20	11.48	0.00129871	0.0322994
GO:0046854	phosphatidylinositol phosphorylation	29	20	11.48	0.00129871	0.0322994
GO:0043409	negative regulation of MAPK cascade	113	61	44.75	0.00131045	0.0324957
GO:0046328	regulation of JNK cascade	113	61	44.75	0.00131045	0.0324957
GO:0072331	signal transduction by p53 class mediato...	96	53	38.02	0.00135726	0.0336071
GO:0048598	embryonic morphogenesis	340	162	134.64	0.00135959	0.0336155
GO:0009628	response to abiotic stimulus	706	318	279.59	0.00138751	0.0342556
GO:0032813	tumor necrosis factor receptor superfami...	35	23	13.75	0.00138992	0.0342652
GO:0002702	positive regulation of production of mol...	31	21	12.28	0.00140592	0.034609
GO:0017070	U6 snRNA binding	7	7	2.75	0.00144221	0.0354505
GO:0006469	negative regulation of protein kinase ac...	157	81	62.17	0.00144512	0.0354706
GO:0032946	positive regulation of mononuclear cell ...	92	51	36.43	0.00146868	0.0359444
GO:0055037	recycling endosome	96	53	38.13	0.00146853	0.0359444
GO:0050778	positive regulation of immune response	274	133	108.51	0.00147478	0.0360413
GO:0016772	transferase activity, transferring phosp...	760	338	298.63	0.00150936	0.03678
GO:0043209	myelin sheath	170	87	67.52	0.00150727	0.03678
GO:0005635	nuclear envelope	310	149	123.13	0.00153751	0.0368283
GO:0016023	cytoplasmic membrane-bounded vesicle	667	302	264.92	0.00153012	0.0368283
GO:0016363	nuclear matrix	73	42	28.99	0.00152065	0.0368283
GO:0030135	coated vesicle	199	100	79.04	0.00153386	0.0368283
GO:0030953	astral microtubule organization	7	7	2.77	0.00152336	0.0368283
GO:0031988	membrane-bounded vesicle	2345	995	931.4	0.00153158	0.0368283
GO:0050671	positive regulation of lymphocyte prolif...	90	50	35.64	0.00152676	0.0368283
GO:0060438	trachea development	10	9	3.96	0.00153558	0.0368283
GO:0070262	peptidyl-serine dephosphorylation	7	7	2.77	0.00152336	0.0368283
GO:0071375	cellular response to peptide hormone sti...	144	75	57.03	0.00151934	0.0368283
GO:0090114	COPII-coated vesicle budding	10	9	3.96	0.00153558	0.0368283
GO:1901861	regulation of muscle tissue development	90	50	35.64	0.00152676	0.0368283
GO:0030127	COPII vesicle coat	7	7	2.78	0.00155527	0.0370958
GO:0070775	H3 histone acetyltransferase complex	7	7	2.78	0.00155527	0.0370958
GO:0070776	MOZ/MORF histone acetyltransferase compl...	7	7	2.78	0.00155527	0.0370958
GO:0050730	regulation of peptidyl-tyrosine phosphor...	131	69	51.88	0.00157124	0.0374238
GO:0006900	membrane budding	35	23	13.86	0.00157386	0.0374326
GO:0048641	regulation of skeletal muscle tissue dev...	65	38	25.74	0.00157604	0.0374326
GO:0031396	regulation of protein ubiquitination	153	79	60.59	0.00159461	0.037619
GO:0033157	regulation of intracellular protein tran...	193	97	76.43	0.00159147	0.037619
GO:0035259	glucocorticoid receptor binding	15	12	5.89	0.00159502	0.037619
GO:0051338	regulation of transferase activity	544	249	215.43	0.00159306	0.037619
GO:0070577	histone acetyl-lysine binding	15	12	5.89	0.00159502	0.037619
GO:0006888	ER to Golgi vesicle-mediated transport	63	37	24.95	0.00161156	0.037956
GO:1901796	regulation of signal transduction by p53...	37	24	14.65	0.00163594	0.0384766
GO:0000792	heterochromatin	67	39	26.61	0.00164231	0.0385726
GO:0010390	histone monoubiquitination	22	16	8.71	0.00168146	0.0394372
GO:2001235	positive regulation of apoptotic signali...	101	55	40	0.00170123	0.0398455
GO:0030666	endocytic vesicle membrane	37	24	14.7	0.00171672	0.0401526
GO:0045732	positive regulation of protein catabolic...	127	67	50.29	0.00172776	0.0402693
GO:0048713	regulation of oligodendrocyte differenti...	15	12	5.94	0.00172886	0.0402693
GO:1902253	regulation of intrinsic apoptotic signal...	15	12	5.94	0.00172886	0.0402693
GO:0030904	retromer complex	22	16	8.74	0.00174499	0.0405205
GO:0043506	regulation of JUN kinase activity	53	32	20.99	0.00174599	0.0405205
GO:0070988	demethylation	43	27	17.03	0.00174684	0.0405205
GO:0032870	cellular response to hormone stimulus	291	140	115.24	0.00174925	0.0405206
GO:0002705	positive regulation of leukocyte mediate...	51	31	20.2	0.00176001	0.0407141
GO:0046427	positive regulation of JAK-STAT cascade	47	29	18.61	0.00176914	0.0408694
GO:0000159	protein phosphatase type 2A complex	15	12	5.96	0.00178242	0.0410636
GO:0030014	CCR4-NOT complex	15	12	5.96	0.00178242	0.0410636
GO:1901653	cellular response to peptide	158	81	62.57	0.00182809	0.0420585
GO:0009719	response to endogenous stimulus	883	391	349.68	0.0018339	0.0420775
GO:0017038	protein import	232	114	91.88	0.00183195	0.0420775
GO:0009056	catabolic process	1712	733	677.98	0.00184648	0.0423088
GO:0018212	peptidyl-tyrosine modification	205	102	81.18	0.00186742	0.0427306
GO:0071496	cellular response to external stimulus	264	128	104.55	0.00188683	0.0431163
GO:0002285	lymphocyte activation involved in immune...	110	59	43.56	0.00190819	0.0434867
GO:0007163	establishment or maintenance of cell pol...	110	59	43.56	0.00190819	0.0434867
GO:0001783	B cell apoptotic process	24	17	9.5	0.00191933	0.0435142
GO:0018279	protein N-linked glycosylation via aspar...	24	17	9.5	0.00191933	0.0435142
GO:0035035	histone acetyltransferase binding	26	18	10.22	0.00191639	0.0435142
GO:0060538	skeletal muscle organ development	176	89	69.7	0.00191971	0.0435142
GO:0060537	muscle tissue development	271	131	107.32	0.00193597	0.0438241
GO:1901701	cellular response to oxygen-containing c...	560	255	221.77	0.00198879	0.0449594
GO:0048634	regulation of muscle organ development	91	50	36.04	0.00209944	0.0473973
GO:0007519	skeletal muscle tissue development	172	87	68.11	0.00212245	0.0478529
GO:0051569	regulation of histone H3-K4 methylation	26	18	10.3	0.00212707	0.0478932
GO:0030234	enzyme regulator activity	713	317	280.16	0.00213979	0.0481154
GO:0008565	protein transporter activity	81	45	31.83	0.00214278	0.0481185
GO:0002703	regulation of leukocyte mediated immunit...	117	62	46.33	0.00218836	0.0490118
GO:0016202	regulation of striated muscle tissue dev...	89	49	35.25	0.00218743	0.0490118
GO:0060341	regulation of cellular localization	658	296	260.58	0.00219625	0.0491234
GO:0051082	unfolded protein binding	58	34	22.79	0.00220062	0.0491559
GO:0002694	regulation of leukocyte activation	297	142	117.62	0.00220509	0.0491908
GO:0044270	cellular nitrogen compound catabolic pro...	632	285	250.28	0.00222506	0.0495706
GO:0051153	regulation of striated muscle cell diffe...	68	39	26.93	0.00224285	0.0499011
