# Supplementary material for: ZFP36 RNA-binding proteins restrain T cell activation and anti-viral immunity
Source: eLife. 2018 May 31;7:e33057. doi: 10.7554/eLife.33057 (PMC6033538; doi:10.7554/eLife.33057)
Supplement: Supplementary File 3. [file elife-33057-supp3.xlsx]

## Sheet: ZFP36 HITS CLIP 3 days
column	description
chr	chromosome
start	chromosome start coordinate
end	chromsome end coordinate
peak.ID	unique peak ID
PH	peak height; the peak amplitude at its heighest point
strand	chromosome strand
BC	biological complexity; the number of independent biological samples (mice or mice pools) supporting the peak (out of 4 total)
gene	ensembl ID gene annotation for peak site
Gene_name	entrez ID gene annotation for peak site
annotation	gene region annotation for peak site; multiple annotations separated by "I"
Gene_type	gene type in ensembl database
Gene_status	gene status in ensembl database
rRNA	overlapping rRNA genes
tRNA	overlapping tRNA gene
CITS	whether the peak site overlaps with significant CITS (cross-link induced truncation sites; FDR < 0.01)
chr	start	end	peak.ID	PH	strand	BC	gene	Gene_name	annotation	Gene_type	Gene_status	rRNA	tRNA	CITS
chr3	108107436	108107496	39704[gene=ENSMUSG00000000001][PH=7][PH0=0.27][P=1.5e-04]	7	-	2	ENSMUSG00000000001	Gnai3	3'UTR	protein_coding	KNOWN	NA	NA	no
chr3	108107860	108107920	39732[gene=ENSMUSG00000000001][PH=9][PH0=0.27][P=2.0e-07]	9	-	3	ENSMUSG00000000001	Gnai3	3'UTR	protein_coding	KNOWN	NA	NA	yes
chr3	108108726	108108786	39785[gene=ENSMUSG00000000001][PH=6][PH0=0.27][P=3.2e-03]	6	-	4	ENSMUSG00000000001	Gnai3	3'UTR	protein_coding	KNOWN	NA	NA	no
chr3	108108702	108108762	39781[gene=ENSMUSG00000000001][PH=6][PH0=0.27][P=3.2e-03]	6	-	3	ENSMUSG00000000001	Gnai3	3'UTR	protein_coding	KNOWN	NA	NA	no
chr16	18780475	18780535	9678[gene=ENSMUSG00000000028][PH=15][PH0=0.03][P=1.2e-13]	15	-	3	ENSMUSG00000000028	Cdc45	3'UTR	protein_coding	KNOWN	NA	NA	yes
chr13	5868641	5868701	775[gene=ENSMUSG00000000078][PH=9][PH0=0.87][P=1.3e-03]	9	+	3	ENSMUSG00000000078	Klf6	3'UTR	protein_coding	KNOWN	NA	NA	no
chr13	5869094	5869154	845[gene=ENSMUSG00000000078][PH=13][PH0=0.87][P=6.6e-08]	13	+	3	ENSMUSG00000000078	Klf6	3'UTR	protein_coding	KNOWN	NA	NA	no
chr13	5870343	5870403	1050[gene=ENSMUSG00000000078][PH=18][PH0=0.87][P=1.0e-100]	18	+	4	ENSMUSG00000000078	Klf6	3'UTR	protein_coding	KNOWN	NA	NA	yes
chr13	5868147	5868207	675[gene=ENSMUSG00000000078][PH=11][PH0=0.87][P=1.1e-05]	11	+	3	ENSMUSG00000000078	Klf6	3'UTR	protein_coding	KNOWN	NA	NA	no
chr13	5868948	5869008	809[gene=ENSMUSG00000000078][PH=19][PH0=0.87][P=1.0e-100]	19	+	3	ENSMUSG00000000078	Klf6	3'UTR	protein_coding	KNOWN	NA	NA	yes
chr13	5868493	5868553	732[gene=ENSMUSG00000000078][PH=21][PH0=0.87][P=1.0e-100]	21	+	4	ENSMUSG00000000078	Klf6	3'UTR	protein_coding	KNOWN	NA	NA	yes
chr13	5869330	5869390	926[gene=ENSMUSG00000000078][PH=21][PH0=0.87][P=1.0e-100]	21	+	4	ENSMUSG00000000078	Klf6	3'UTR	protein_coding	KNOWN	NA	NA	yes
chr13	5869198	5869258	876[gene=ENSMUSG00000000078][PH=29][PH0=0.87][P=1.0e-100]	29	+	4	ENSMUSG00000000078	Klf6	3'UTR	protein_coding	KNOWN	NA	NA	yes
chr7	126152626	126152686	54294[gene=ENSMUSG00000000131][PH=6][PH0=0.28][P=8.2e-03]	6	-	4	ENSMUSG00000000131	Xpo6	downstream 10K|intron	protein_coding	KNOWN	NA	NA	no
chr7	126151721	126151781	54259[gene=ENSMUSG00000000131][PH=6][PH0=0.28][P=8.2e-03]	6	-	2	ENSMUSG00000000131	Xpo6	downstream 10K|intron	protein_coding	KNOWN	NA	NA	yes
chr11	108949704	108949764	98821[gene=ENSMUSG00000000142][PH=4][PH0=0.03][P=1.0e-04]	4	+	3	ENSMUSG00000000142	Axin2	3'UTR	protein_coding	KNOWN	NA	NA	no
chr11	108949617	108949677	98812[gene=ENSMUSG00000000142][PH=5][PH0=0.03][P=7.3e-07]	5	+	3	ENSMUSG00000000142	Axin2	3'UTR	protein_coding	KNOWN	NA	NA	yes
chr9	50635809	50635869	26739[gene=ENSMUSG00000000168][PH=7][PH0=0.08][P=2.7e-08]	7	-	3	ENSMUSG00000000168	Dlat	3'UTR	protein_coding	KNOWN	NA	NA	yes
chr9	50636269	50636329	26761[gene=ENSMUSG00000000168][PH=6][PH0=0.08][P=2.0e-06]	6	-	3	ENSMUSG00000000168	Dlat	3'UTR	protein_coding	KNOWN	NA	NA	yes
chr9	50636339	50636399	26772[gene=ENSMUSG00000000168][PH=5][PH0=0.08][P=1.2e-04]	5	-	2	ENSMUSG00000000168	Dlat	3'UTR	protein_coding	KNOWN	NA	NA	yes
chr9	50596896	50596956	26610[gene=ENSMUSG00000000171][PH=5][PH0=0.05][P=5.0e-06]	5	-	4	ENSMUSG00000000171	Sdhd	3'UTR	protein_coding	KNOWN	NA	NA	yes
chr6	127130205	127130265	66880[gene=ENSMUSG00000000184][PH=38][PH0=1.75][P=3.0e-13]	38	-	4	ENSMUSG00000000184	Ccnd2	3'UTR	protein_coding	KNOWN	NA	NA	yes
chr6	127128169	127128229	66251[gene=ENSMUSG00000000184][PH=15][PH0=1.75][P=7.1e-06]	15	-	4	ENSMUSG00000000184	Ccnd2	3'UTR	protein_coding	KNOWN	NA	NA	no
chr6	127150847	127150907	67924[gene=ENSMUSG00000000184][PH=23][PH0=1.75][P=4.0e-13]	23	-	2	ENSMUSG00000000184	Ccnd2	5'UTR	protein_coding	KNOWN	NA	NA	yes
chr6	127126762	127126822	66099[gene=ENSMUSG00000000184][PH=20][PH0=1.75][P=8.7e-11]	20	-	3	ENSMUSG00000000184	Ccnd2	3'UTR	protein_coding	KNOWN	NA	NA	yes
chr6	127149178	127149238	67781[gene=ENSMUSG00000000184][PH=12][PH0=1.75][P=2.8e-03]	12	-	3	ENSMUSG00000000184	Ccnd2	intron	protein_coding	KNOWN	NA	NA	no
chr6	127129888	127129948	66728[gene=ENSMUSG00000000184][PH=14][PH0=1.75][P=5.6e-05]	14	-	3	ENSMUSG00000000184	Ccnd2	3'UTR	protein_coding	KNOWN	NA	NA	no
chr6	127129264	127129324	66596[gene=ENSMUSG00000000184][PH=15][PH0=1.75][P=7.1e-06]	15	-	3	ENSMUSG00000000184	Ccnd2	3'UTR	protein_coding	KNOWN	NA	NA	yes
chr6	127127492	127127552	66174[gene=ENSMUSG00000000184][PH=19][PH0=1.75][P=9.4e-10]	19	-	4	ENSMUSG00000000184	Ccnd2	3'UTR	protein_coding	KNOWN	NA	NA	yes
chr6	127125748	127125808	65968[gene=ENSMUSG00000000184][PH=12][PH0=1.75][P=2.8e-03]	12	-	4	ENSMUSG00000000184	Ccnd2	3'UTR	protein_coding	KNOWN	NA	NA	yes
chr6	127129542	127129602	66672[gene=ENSMUSG00000000184][PH=19][PH0=1.75][P=9.4e-10]	19	-	4	ENSMUSG00000000184	Ccnd2	3'UTR	protein_coding	KNOWN	NA	NA	yes
chr6	127130033	127130093	66799[gene=ENSMUSG00000000184][PH=145][PH0=1.75][P=3.0e-13]	145	-	4	ENSMUSG00000000184	Ccnd2	3'UTR	protein_coding	KNOWN	NA	NA	yes
chr6	127150807	127150867	67910[gene=ENSMUSG00000000184][PH=12][PH0=1.75][P=2.8e-03]	12	-	3	ENSMUSG00000000184	Ccnd2	5'UTR	protein_coding	KNOWN	NA	NA	yes
chr6	127130129	127130189	66842[gene=ENSMUSG00000000184][PH=27][PH0=1.75][P=3.0e-13]	27	-	4	ENSMUSG00000000184	Ccnd2	3'UTR	protein_coding	KNOWN	NA	NA	yes
chr6	127128577	127128637	66395[gene=ENSMUSG00000000184][PH=100][PH0=1.75][P=3.0e-13]	100	-	4	ENSMUSG00000000184	Ccnd2	3'UTR	protein_coding	KNOWN	NA	NA	yes
chr6	127129324	127129384	66612[gene=ENSMUSG00000000184][PH=17][PH0=1.75][P=9.2e-08]	17	-	4	ENSMUSG00000000184	Ccnd2	3'UTR	protein_coding	KNOWN	NA	NA	no
chr6	127128465	127128525	66319[gene=ENSMUSG00000000184][PH=43][PH0=1.75][P=3.0e-13]	43	-	4	ENSMUSG00000000184	Ccnd2	3'UTR	protein_coding	KNOWN	NA	NA	yes
chr6	127128718	127128778	66455[gene=ENSMUSG00000000184][PH=35][PH0=1.75][P=3.0e-13]	35	-	4	ENSMUSG00000000184	Ccnd2	3'UTR	protein_coding	KNOWN	NA	NA	yes
chr6	127128904	127128964	66541[gene=ENSMUSG00000000184][PH=31][PH0=1.75][P=3.0e-13]	31	-	3	ENSMUSG00000000184	Ccnd2	3'UTR	protein_coding	KNOWN	NA	NA	yes
chr6	127128779	127128839	66494[gene=ENSMUSG00000000184][PH=40][PH0=1.75][P=3.0e-13]	40	-	4	ENSMUSG00000000184	Ccnd2	3'UTR	protein_coding	KNOWN	NA	NA	yes
chr6	127129411	127129471	66640[gene=ENSMUSG00000000184][PH=12][PH0=1.75][P=2.8e-03]	12	-	3	ENSMUSG00000000184	Ccnd2	3'UTR	protein_coding	KNOWN	NA	NA	no
chr11	89015116	89015176	84846[gene=ENSMUSG00000000275][PH=5][PH0=0.20][P=8.8e-03]	5	+	1	ENSMUSG00000000275	Trim25	downstream 10K|intron	protein_coding	KNOWN	NA	NA	no
chr11	89019215	89019275	84969[gene=ENSMUSG00000000275][PH=6][PH0=0.20][P=3.6e-04]	6	+	2	ENSMUSG00000000275	Trim25	3'UTR	protein_coding	KNOWN	NA	NA	yes
chr11	89017143	89017203	84905[gene=ENSMUSG00000000275][PH=6][PH0=0.20][P=3.6e-04]	6	+	2	ENSMUSG00000000275	Trim25	3'UTR	protein_coding	KNOWN	NA	NA	no
chr11	89017321	89017381	84917[gene=ENSMUSG00000000275][PH=5][PH0=0.20][P=8.8e-03]	5	+	2	ENSMUSG00000000275	Trim25	3'UTR	protein_coding	KNOWN	NA	NA	no
chr11	89044025	89044085	70666[gene=ENSMUSG00000000276][PH=4][PH0=0.06][P=2.9e-03]	4	-	2	ENSMUSG00000000276	Dgke	downstream 10K|intron	protein_coding	KNOWN	NA	NA	no
chr11	89039766	89039826	70641[gene=ENSMUSG00000000276][PH=5][PH0=0.06][P=4.7e-05]	5	-	3	ENSMUSG00000000276	Dgke	3'UTR	protein_coding	KNOWN	NA	NA	no
chr11	89038259	89038319	70613[gene=ENSMUSG00000000276][PH=5][PH0=0.06][P=4.7e-05]	5	-	3	ENSMUSG00000000276	Dgke	3'UTR	protein_coding	KNOWN	NA	NA	no
chr11	88924432	88924492	70579[gene=ENSMUSG00000000278][PH=3][PH0=0.01][P=1.5e-03]	3	-	2	ENSMUSG00000000278	Scpep1	3'UTR	protein_coding	KNOWN	NA	NA	no
chr11	74844639	74844699	66101[gene=ENSMUSG00000000282][PH=4][PH0=0.07][P=2.2e-03]	4	+	3	ENSMUSG00000000282	Mnt	3'UTR	protein_coding	KNOWN	NA	NA	yes
chr10	77561145	77561205	53802[gene=ENSMUSG00000000290][PH=7][PH0=0.28][P=1.5e-04]	7	+	2	ENSMUSG00000000290	Itgb2	3'UTR|CDS	protein_coding	KNOWN	NA	NA	no
chr10	77559483	77559543	53741[gene=ENSMUSG00000000290][PH=6][PH0=0.28][P=3.3e-03]	6	+	3	ENSMUSG00000000290	Itgb2	CDS|downstream 10K|intron	protein_coding	KNOWN	NA	NA	no
chr10	77565552	77565612	53891[gene=ENSMUSG00000000290][PH=46][PH0=0.28][P=1.0e-100]	46	+	4	ENSMUSG00000000290	Itgb2	3'UTR	protein_coding	KNOWN	NA	NA	yes
chr2	179587655	179587715	129652[gene=ENSMUSG00000000305][PH=4][PH0=0.00][P=2.5e-11]	4	+	2	ENSMUSG00000000305	Cdh4	intron	protein_coding	KNOWN	NA	NA	yes
chr3	116549094	116549154	63109[gene=ENSMUSG00000000340][PH=5][PH0=0.05][P=1.5e-05]	5	+	4	ENSMUSG00000000340	Dbt	3'UTR	protein_coding	KNOWN	NA	NA	yes
chr15	100620695	100620755	44194[gene=ENSMUSG00000000346][PH=6][PH0=0.13][P=1.6e-05]	6	+	4	ENSMUSG00000000346	Dazap2	3'UTR	protein_coding	KNOWN	NA	NA	no
chr15	100620080	100620140	44143[gene=ENSMUSG00000000346][PH=9][PH0=0.13][P=1.2e-10]	9	+	4	ENSMUSG00000000346	Dazap2	3'UTR	protein_coding	KNOWN	NA	NA	no
chr15	100620505	100620565	44171[gene=ENSMUSG00000000346][PH=8][PH0=0.13][P=7.2e-09]	8	+	3	ENSMUSG00000000346	Dazap2	3'UTR	protein_coding	KNOWN	NA	NA	no
chr10	78187059	78187119	51191[gene=ENSMUSG00000000374][PH=5][PH0=0.08][P=1.9e-04]	5	-	3	ENSMUSG00000000374	Trappc10	3'UTR	protein_coding	KNOWN	NA	NA	no
chr10	78186803	78186863	51173[gene=ENSMUSG00000000374][PH=8][PH0=0.08][P=4.2e-10]	8	-	3	ENSMUSG00000000374	Trappc10	3'UTR	protein_coding	KNOWN	NA	NA	yes
chr10	78187078	78187138	51194[gene=ENSMUSG00000000374][PH=4][PH0=0.08][P=9.6e-03]	4	-	3	ENSMUSG00000000374	Trappc10	3'UTR	protein_coding	KNOWN	NA	NA	no
chr10	78187111	78187171	51198[gene=ENSMUSG00000000374][PH=4][PH0=0.08][P=9.6e-03]	4	-	3	ENSMUSG00000000374	Trappc10	3'UTR	protein_coding	KNOWN	NA	NA	yes
chr11	6619842	6619902	7414[gene=ENSMUSG00000000384][PH=10][PH0=0.23][P=3.8e-10]	10	-	3	ENSMUSG00000000384	Tbrg4	intron	protein_coding	KNOWN	NA	NA	yes
chr4	129558111	129558171	46499[gene=ENSMUSG00000000409][PH=8][PH0=0.32][P=1.2e-05]	8	-	2	ENSMUSG00000000409	Lck	CDS	protein_coding	KNOWN	NA	NA	no
chr4	129548346	129548406	46322[gene=ENSMUSG00000000409][PH=6][PH0=0.32][P=5.2e-03]	6	-	2	ENSMUSG00000000409	Lck	3'UTR	protein_coding	KNOWN	NA	NA	no
chr18	24238299	24238359	13417[gene=ENSMUSG00000000420][PH=10][PH0=0.09][P=1.0e-100]	10	+	4	ENSMUSG00000000420	Galnt1	5'UTR	protein_coding	KNOWN	NA	NA	yes
chr6	115618598	115618658	57667[gene=ENSMUSG00000000439][PH=12][PH0=0.09][P=1.0e-100]	12	+	3	ENSMUSG00000000439	Mkrn2	3'UTR	protein_coding	KNOWN	NA	NA	yes
chr7	127218155	127218215	57137[gene=ENSMUSG00000000486][PH=4][PH0=0.11][P=8.0e-03]	4	-	3	ENSMUSG00000000486	2017-09-01	5'UTR|CDS	protein_coding	KNOWN	NA	NA	no
chr15	79995875	79995935	50561[gene=ENSMUSG00000000489][PH=53][PH0=0.13][P=1.0e-100]	53	-	4	ENSMUSG00000000489	Pdgfb	3'UTR	protein_coding	KNOWN	NA	NA	yes
chr15	101232038	101232098	44359[gene=ENSMUSG00000000531][PH=15][PH0=0.05][P=1.0e-100]	15	+	4	ENSMUSG00000000531	Grasp	3'UTR	protein_coding	KNOWN	NA	NA	yes
chr3	105942702	105942762	33383[gene=ENSMUSG00000000563][PH=9][PH0=0.08][P=2.2e-12]	9	-	3	ENSMUSG00000000563	Atp5f1	3'UTR	protein_coding	KNOWN	NA	NA	yes
chr5	99961046	99961106	32546[gene=ENSMUSG00000000568][PH=13][PH0=0.49][P=8.5e-11]	13	-	4	ENSMUSG00000000568	Hnrnpd	3'UTR	protein_coding	KNOWN	NA	NA	yes
chr5	99968040	99968100	32784[gene=ENSMUSG00000000568][PH=9][PH0=0.49][P=1.7e-05]	9	-	2	ENSMUSG00000000568	Hnrnpd	intron	protein_coding	KNOWN	NA	NA	no
chr5	99961940	99962000	32613[gene=ENSMUSG00000000568][PH=7][PH0=0.49][P=4.0e-03]	7	-	3	ENSMUSG00000000568	Hnrnpd	downstream 10K|intron	protein_coding	KNOWN	NA	NA	no
chr5	99961210	99961270	32572[gene=ENSMUSG00000000568][PH=10][PH0=0.49][P=9.5e-07]	10	-	2	ENSMUSG00000000568	Hnrnpd	3'UTR	protein_coding	KNOWN	NA	NA	yes
chr11	55109969	55110029	49855[gene=ENSMUSG00000000594][PH=8][PH0=0.14][P=1.2e-08]	8	+	3	ENSMUSG00000000594	Gm2a	3'UTR	protein_coding	KNOWN	NA	NA	no
chr11	55110559	55110619	49909[gene=ENSMUSG00000000594][PH=5][PH0=0.14][P=1.0e-03]	5	+	2	ENSMUSG00000000594	Gm2a	3'UTR	protein_coding	KNOWN	NA	NA	no
chr11	55109389	55109449	49817[gene=ENSMUSG00000000594][PH=7][PH0=0.14][P=6.2e-07]	7	+	2	ENSMUSG00000000594	Gm2a	CDS	protein_coding	KNOWN	NA	NA	no
chr11	55110468	55110528	49892[gene=ENSMUSG00000000594][PH=14][PH0=0.14][P=1.0e-100]	14	+	3	ENSMUSG00000000594	Gm2a	3'UTR	protein_coding	KNOWN	NA	NA	yes
chr6	82931649	82931709	33702[gene=ENSMUSG00000000627][PH=3][PH0=0.03][P=9.0e-03]	3	-	2	ENSMUSG00000000627	Sema4f	intron	protein_coding	KNOWN	NA	NA	no
chr6	82726468	82726528	32375[gene=ENSMUSG00000000628][PH=9][PH0=0.68][P=5.5e-04]	9	-	3	ENSMUSG00000000628	Hk2	3'UTR	protein_coding	KNOWN	NA	NA	no
chr6	82725766	82725826	32241[gene=ENSMUSG00000000628][PH=20][PH0=0.68][P=3.4e-13]	20	-	4	ENSMUSG00000000628	Hk2	3'UTR|intron	protein_coding	KNOWN	NA	NA	yes
chr6	82725693	82725753	32217[gene=ENSMUSG00000000628][PH=9][PH0=0.68][P=5.5e-04]	9	-	4	ENSMUSG00000000628	Hk2	3'UTR|intron	protein_coding	KNOWN	NA	NA	no
chr6	82725335	82725395	32176[gene=ENSMUSG00000000628][PH=10][PH0=0.68][P=4.2e-05]	10	-	2	ENSMUSG00000000628	Hk2	3'UTR	protein_coding	KNOWN	NA	NA	no
chr6	82727106	82727166	32518[gene=ENSMUSG00000000628][PH=13][PH0=0.68][P=1.0e-08]	13	-	4	ENSMUSG00000000628	Hk2	3'UTR	protein_coding	KNOWN	NA	NA	no
chr6	82725021	82725081	32123[gene=ENSMUSG00000000628][PH=15][PH0=0.68][P=2.6e-11]	15	-	3	ENSMUSG00000000628	Hk2	3'UTR	protein_coding	KNOWN	NA	NA	yes
chr6	82725228	82725288	32158[gene=ENSMUSG00000000628][PH=11][PH0=0.68][P=2.9e-06]	11	-	3	ENSMUSG00000000628	Hk2	3'UTR	protein_coding	KNOWN	NA	NA	yes
chr6	82726600	82726660	32442[gene=ENSMUSG00000000628][PH=118][PH0=0.68][P=3.4e-13]	118	-	4	ENSMUSG00000000628	Hk2	3'UTR	protein_coding	KNOWN	NA	NA	yes
chr6	82765706	82765766	33453[gene=ENSMUSG00000000628][PH=9][PH0=0.68][P=5.5e-04]	9	-	2	ENSMUSG00000000628	Hk2	intron	protein_coding	KNOWN	NA	NA	no
chr6	82727223	82727283	32558[gene=ENSMUSG00000000628][PH=27][PH0=0.68][P=3.4e-13]	27	-	4	ENSMUSG00000000628	Hk2	3'UTR	protein_coding	KNOWN	NA	NA	yes
chr6	82726775	82726835	32489[gene=ENSMUSG00000000628][PH=8][PH0=0.68][P=6.4e-03]	8	-	2	ENSMUSG00000000628	Hk2	3'UTR	protein_coding	KNOWN	NA	NA	no
chr6	82774172	82774232	33647[gene=ENSMUSG00000000628][PH=9][PH0=0.68][P=5.5e-04]	9	-	3	ENSMUSG00000000628	Hk2	5'UTR	protein_coding	KNOWN	NA	NA	no
chr6	82725867	82725927	32299[gene=ENSMUSG00000000628][PH=75][PH0=0.68][P=3.4e-13]	75	-	4	ENSMUSG00000000628	Hk2	3'UTR|intron	protein_coding	KNOWN	NA	NA	yes
chr4	134093658	134093718	52903[gene=ENSMUSG00000000682][PH=4][PH0=0.06][P=9.5e-04]	4	-	2	ENSMUSG00000000682	Cd52	3'UTR|intron	protein_coding	KNOWN	NA	NA	no
chr4	134093628	134093688	52901[gene=ENSMUSG00000000682][PH=4][PH0=0.06][P=9.5e-04]	4	-	2	ENSMUSG00000000682	Cd52	3'UTR|intron	protein_coding	KNOWN	NA	NA	no
chr4	134093700	134093760	52909[gene=ENSMUSG00000000682][PH=4][PH0=0.06][P=9.5e-04]	4	-	2	ENSMUSG00000000682	Cd52	3'UTR|CDS|intron	protein_coding	KNOWN	NA	NA	no
chr4	134093587	134093647	52895[gene=ENSMUSG00000000682][PH=5][PH0=0.06][P=1.4e-05]	5	-	2	ENSMUSG00000000682	Cd52	3'UTR|intron	protein_coding	KNOWN	NA	NA	no
chr4	134093818	134093878	52923[gene=ENSMUSG00000000682][PH=9][PH0=0.06][P=1.3e-13]	9	-	4	ENSMUSG00000000682	Cd52	CDS|intron	protein_coding	KNOWN	NA	NA	no
chr8	123104831	123104891	62538[gene=ENSMUSG00000092329][PH=5][PH0=0.03][P=7.4e-05]	5	+	3	ENSMUSG00000000740	Rpl13	downstream 10K|intron	protein_coding	KNOWN	NA	NA	no
chr8	123103818	123103878	62507[gene=ENSMUSG00000092329][PH=5][PH0=0.03][P=7.4e-05]	5	+	3	ENSMUSG00000000740	Rpl13	downstream 10K|intron	protein_coding	KNOWN	NA	NA	no
chr8	123105184	123105244	62551[gene=ENSMUSG00000092329][PH=5][PH0=0.03][P=7.4e-05]	5	+	4	ENSMUSG00000000740	Rpl13	3'UTR|intron	protein_coding	KNOWN	NA	NA	no
chr8	123103055	123103115	62472[gene=ENSMUSG00000092329][PH=556][PH0=0.03][P=1.3e-11]	556	+	4	ENSMUSG00000000740	Rpl13	downstream 10K|intron	protein_coding	KNOWN	NA	NA	yes
chr14	70439175	70439235	33770[gene=ENSMUSG00000000776][PH=35][PH0=0.19][P=4.2e-14]	35	-	4	ENSMUSG00000000776	Polr3d	3'UTR	protein_coding	KNOWN	NA	NA	yes
chrX	13291941	13292001	2104[gene=ENSMUSG00000000787][PH=9][PH0=0.38][P=1.5e-06]	9	+	4	ENSMUSG00000000787	Ddx3x	3'UTR	protein_coding	KNOWN	NA	NA	yes
chrX	13292359	13292419	2153[gene=ENSMUSG00000000787][PH=6][PH0=0.38][P=9.0e-03]	6	+	2	ENSMUSG00000000787	Ddx3x	3'UTR	protein_coding	KNOWN	NA	NA	no
chrX	13292524	13292584	2171[gene=ENSMUSG00000000787][PH=8][PH0=0.38][P=3.1e-05]	8	+	3	ENSMUSG00000000787	Ddx3x	3'UTR	protein_coding	KNOWN	NA	NA	yes
chrX	13291989	13292049	2115[gene=ENSMUSG00000000787][PH=8][PH0=0.38][P=3.1e-05]	8	+	4	ENSMUSG00000000787	Ddx3x	3'UTR	protein_coding	KNOWN	NA	NA	no
chrX	13284917	13284977	1912[gene=ENSMUSG00000000787][PH=6][PH0=0.38][P=9.0e-03]	6	+	2	ENSMUSG00000000787	Ddx3x	CDS	protein_coding	KNOWN	NA	NA	yes
chrX	13292843	13292903	2203[gene=ENSMUSG00000000787][PH=7][PH0=0.38][P=5.7e-04]	7	+	4	ENSMUSG00000000787	Ddx3x	3'UTR	protein_coding	KNOWN	NA	NA	yes
chrX	13291604	13291664	2078[gene=ENSMUSG00000000787][PH=11][PH0=0.38][P=2.3e-09]	11	+	4	ENSMUSG00000000787	Ddx3x	3'UTR|intron	protein_coding	KNOWN	NA	NA	yes
chrX	13292299	13292359	2141[gene=ENSMUSG00000000787][PH=6][PH0=0.38][P=9.0e-03]	6	+	3	ENSMUSG00000000787	Ddx3x	3'UTR	protein_coding	KNOWN	NA	NA	yes
chr2	181515711	181515771	130996[gene=ENSMUSG00000088378][PH=5][PH0=0.25][P=7.8e-03]	5	+	3	ENSMUSG00000000827	Tpd52l2	3'UTR	protein_coding	KNOWN	NA	NA	no
chrX	68717210	68717270	13548[gene=ENSMUSG00000000838][PH=6][PH0=0.14][P=5.9e-05]	6	+	4	ENSMUSG00000000838	Fmr1	3'UTR	protein_coding	KNOWN	NA	NA	yes
chrX	68716891	68716951	13529[gene=ENSMUSG00000000838][PH=7][PH0=0.14][P=1.4e-06]	7	+	3	ENSMUSG00000000838	Fmr1	3'UTR	protein_coding	KNOWN	NA	NA	no
chr11	53612461	53612521	32506[gene=ENSMUSG00000000869][PH=1345][PH0=2.76][P=1.5e-13]	1345	-	4	ENSMUSG00000000869	Il4	3'UTR|intron	protein_coding	KNOWN	NA	NA	yes
chr11	53618464	53618524	32872[gene=ENSMUSG00000000869][PH=15][PH0=2.76][P=1.6e-03]	15	-	4	ENSMUSG00000000869	Il4	CDS	protein_coding	KNOWN	NA	NA	no
chr11	53613956	53614016	32690[gene=ENSMUSG00000000869][PH=136][PH0=2.76][P=1.5e-13]	136	-	4	ENSMUSG00000000869	Il4	5'UTR|CDS	protein_coding	KNOWN	NA	NA	yes
chr11	53618508	53618568	32899[gene=ENSMUSG00000000869][PH=27][PH0=2.76][P=2.2e-13]	27	-	4	ENSMUSG00000000869	Il4	CDS	protein_coding	KNOWN	NA	NA	yes
chr11	83648573	83648633	58274[gene=ENSMUSG00000000982][PH=64][PH0=29.57][P=1.6e-04]	64	-	4	ENSMUSG00000000982	Ccl3	CDS	protein_coding	KNOWN	NA	NA	yes
chr11	83648270	83648330	58179[gene=ENSMUSG00000000982][PH=99][PH0=29.57][P=2.6e-12]	99	-	4	ENSMUSG00000000982	Ccl3	CDS	protein_coding	KNOWN	NA	NA	yes
chr11	83647981	83648041	57942[gene=ENSMUSG00000000982][PH=4178][PH0=29.57][P=2.6e-12]	4178	-	4	ENSMUSG00000000982	Ccl3	3'UTR	protein_coding	KNOWN	NA	NA	no
chr3	90506965	90507025	21738[gene=ENSMUSG00000001017][PH=5][PH0=0.23][P=9.9e-03]	5	-	2	ENSMUSG00000001017	Chtop	5'UTR|downstream 10K|intron	protein_coding	KNOWN	NA	NA	no
chr3	90506668	90506728	21716[gene=ENSMUSG00000001017][PH=5][PH0=0.23][P=9.9e-03]	5	-	2	ENSMUSG00000001017	Chtop	5'UTR|downstream 10K|intron	protein_coding	KNOWN	NA	NA	no
chr5	34633643	34633703	12012[gene=ENSMUSG00000001082][PH=5][PH0=0.03][P=2.8e-07]	5	-	4	ENSMUSG00000001082	Mfsd10	3'UTR	protein_coding	KNOWN	NA	NA	no
chr5	114365265	114365325	41137[gene=ENSMUSG00000001098][PH=14][PH0=0.07][P=1.0e-100]	14	-	4	ENSMUSG00000001098	Kctd10	3'UTR	protein_coding	KNOWN	NA	NA	yes
chrX	20849042	20849102	3413[gene=ENSMUSG00000001127][PH=4][PH0=0.04][P=4.7e-04]	4	+	2	ENSMUSG00000001127	Araf	5'UTR|intron	protein_coding	KNOWN	NA	NA	no
chrX	20849020	20849080	3411[gene=ENSMUSG00000001127][PH=4][PH0=0.04][P=4.7e-04]	4	+	2	ENSMUSG00000001127	Araf	5'UTR|intron	protein_coding	KNOWN	NA	NA	no
chr1	36522314	36522374	3564[gene=ENSMUSG00000001138][PH=3][PH0=0.02][P=3.6e-03]	3	+	3	ENSMUSG00000001138	Cnnm3	intron	protein_coding	KNOWN	NA	NA	no
chr6	86649731	86649791	37375[gene=ENSMUSG00000001156][PH=7][PH0=0.23][P=3.0e-05]	7	-	2	ENSMUSG00000001156	Mxd1	3'UTR	protein_coding	KNOWN	NA	NA	no
chr6	86649966	86650026	37462[gene=ENSMUSG00000001156][PH=14][PH0=0.23][P=1.8e-13]	14	-	4	ENSMUSG00000001156	Mxd1	3'UTR	protein_coding	KNOWN	NA	NA	yes
chr6	86648986	86649046	37331[gene=ENSMUSG00000001156][PH=10][PH0=0.23][P=7.4e-10]	10	-	3	ENSMUSG00000001156	Mxd1	3'UTR	protein_coding	KNOWN	NA	NA	no
chr6	86649374	86649434	37349[gene=ENSMUSG00000001156][PH=9][PH0=0.23][P=2.9e-08]	9	-	2	ENSMUSG00000001156	Mxd1	3'UTR	protein_coding	KNOWN	NA	NA	no
chr6	86649817	86649877	37405[gene=ENSMUSG00000001156][PH=35][PH0=0.23][P=1.8e-13]	35	-	4	ENSMUSG00000001156	Mxd1	3'UTR	protein_coding	KNOWN	NA	NA	yes
chr6	86675362	86675422	37624[gene=ENSMUSG00000001158][PH=5][PH0=0.06][P=1.9e-05]	5	-	3	ENSMUSG00000001158	Snrnp27	3'UTR	protein_coding	KNOWN	NA	NA	yes
chr12	100206764	100206824	50298[gene=ENSMUSG00000001175][PH=13][PH0=0.54][P=2.1e-10]	13	+	4	ENSMUSG00000001175	Calm1	3'UTR	protein_coding	KNOWN	NA	NA	yes
chr12	100207120	100207180	50383[gene=ENSMUSG00000001175][PH=8][PH0=0.54][P=4.2e-04]	8	+	3	ENSMUSG00000001175	Calm1	3'UTR	protein_coding	KNOWN	NA	NA	no
chr12	100205636	100205696	50137[gene=ENSMUSG00000001175][PH=7][PH0=0.54][P=5.3e-03]	7	+	3	ENSMUSG00000001175	Calm1	CDS	protein_coding	KNOWN	NA	NA	no
chr12	100207260	100207320	50403[gene=ENSMUSG00000001175][PH=19][PH0=0.54][P=5.8e-14]	19	+	4	ENSMUSG00000001175	Calm1	3'UTR	protein_coding	KNOWN	NA	NA	yes
chr12	100206615	100206675	50265[gene=ENSMUSG00000001175][PH=11][PH0=0.54][P=9.4e-08]	11	+	2	ENSMUSG00000001175	Calm1	3'UTR	protein_coding	KNOWN	NA	NA	yes
chr12	100206456	100206516	50214[gene=ENSMUSG00000001175][PH=23][PH0=0.54][P=5.8e-14]	23	+	4	ENSMUSG00000001175	Calm1	3'UTR	protein_coding	KNOWN	NA	NA	yes
chr12	100206889	100206949	50339[gene=ENSMUSG00000001175][PH=19][PH0=0.54][P=5.8e-14]	19	+	3	ENSMUSG00000001175	Calm1	3'UTR	protein_coding	KNOWN	NA	NA	no
chr12	100199576	100199636	50027[gene=ENSMUSG00000072884][PH=4][PH0=0.07][P=1.5e-03]	4	+	2	ENSMUSG00000001175	Calm1	5'UTR	protein_coding	KNOWN	NA	NA	no
chr17	56186673	56186733	39453[gene=ENSMUSG00000001229][PH=4][PH0=0.07][P=4.5e-03]	4	-	4	ENSMUSG00000001229	Dpp9	3'UTR	protein_coding	KNOWN	NA	NA	no
chr17	56187028	56187088	39462[gene=ENSMUSG00000001229][PH=6][PH0=0.07][P=1.2e-06]	6	-	4	ENSMUSG00000001229	Dpp9	3'UTR	protein_coding	KNOWN	NA	NA	yes
chr11	101259176	101259236	94905[gene=ENSMUSG00000001240][PH=4][PH0=0.02][P=3.8e-05]	4	+	2	ENSMUSG00000001240	Ramp2	3'UTR	protein_coding	KNOWN	NA	NA	no
chr7	31130119	31130179	10376[gene=ENSMUSG00000001248][PH=28][PH0=0.29][P=1.0e-100]	28	-	4	ENSMUSG00000001248	Gramd1a	3'UTR	protein_coding	KNOWN	NA	NA	yes
chr7	31135190	31135250	10515[gene=ENSMUSG00000001248][PH=8][PH0=0.29][P=5.6e-06]	8	-	2	ENSMUSG00000001248	Gramd1a	intron	protein_coding	KNOWN	NA	NA	yes
chr7	31134776	31134836	10473[gene=ENSMUSG00000001248][PH=6][PH0=0.29][P=2.8e-03]	6	-	3	ENSMUSG00000001248	Gramd1a	intron	protein_coding	KNOWN	NA	NA	no
chr7	31134850	31134910	10486[gene=ENSMUSG00000001248][PH=7][PH0=0.29][P=1.4e-04]	7	-	3	ENSMUSG00000001248	Gramd1a	intron	protein_coding	KNOWN	NA	NA	no
chr15	102431572	102431632	46092[gene=ENSMUSG00000001280][PH=5][PH0=0.14][P=1.9e-03]	5	+	2	ENSMUSG00000001280	Sp1	3'UTR	protein_coding	KNOWN	NA	NA	no
chr15	102431724	102431784	46106[gene=ENSMUSG00000001280][PH=5][PH0=0.14][P=1.9e-03]	5	+	3	ENSMUSG00000001280	Sp1	3'UTR	protein_coding	KNOWN	NA	NA	no
chr15	102432277	102432337	46129[gene=ENSMUSG00000001280][PH=6][PH0=0.14][P=5.3e-05]	6	+	3	ENSMUSG00000001280	Sp1	3'UTR	protein_coding	KNOWN	NA	NA	no
chr15	102434635	102434695	46216[gene=ENSMUSG00000001280][PH=5][PH0=0.14][P=1.9e-03]	5	+	2	ENSMUSG00000001280	Sp1	3'UTR	protein_coding	KNOWN	NA	NA	no
chr15	102432858	102432918	46171[gene=ENSMUSG00000001280][PH=12][PH0=0.14][P=1.1e-13]	12	+	4	ENSMUSG00000001280	Sp1	3'UTR	protein_coding	KNOWN	NA	NA	no
chr15	102432769	102432829	46156[gene=ENSMUSG00000001280][PH=7][PH0=0.14][P=1.2e-06]	7	+	4	ENSMUSG00000001280	Sp1	3'UTR	protein_coding	KNOWN	NA	NA	yes
chr15	102224358	102224418	64501[gene=ENSMUSG00000001281][PH=4][PH0=0.04][P=1.8e-04]	4	-	3	ENSMUSG00000001281	Itgb7	CDS	protein_coding	KNOWN	NA	NA	no
chr9	22127051	22127111	4415[gene=ENSMUSG00000001348][PH=5][PH0=0.03][P=5.5e-07]	5	-	4	ENSMUSG00000001348	Acp5	CDS	protein_coding	KNOWN	NA	NA	no
chr9	22099684	22099744	36318[gene=ENSMUSG00000001349][PH=5][PH0=0.01][P=1.8e-09]	5	+	4	ENSMUSG00000001349	Cnn1	intron	protein_coding	KNOWN	NA	NA	yes
chr18	36766676	36766736	13529[gene=ENSMUSG00000001380][PH=29][PH0=0.15][P=1.0e-100]	29	-	4	ENSMUSG00000001380	Hars	3'UTR	protein_coding	KNOWN	NA	NA	yes
chr3	88168805	88168865	42016[gene=ENSMUSG00000001419][PH=20][PH0=0.21][P=1.0e-100]	20	+	4	ENSMUSG00000001419	Mef2d	3'UTR	protein_coding	KNOWN	NA	NA	yes
chr3	88168908	88168968	42040[gene=ENSMUSG00000001419][PH=7][PH0=0.21][P=2.1e-05]	7	+	3	ENSMUSG00000001419	Mef2d	3'UTR	protein_coding	KNOWN	NA	NA	yes
chr6	28813560	28813620	14325[gene=ENSMUSG00000001424][PH=7][PH0=0.31][P=3.5e-03]	7	+	3	ENSMUSG00000001424	Snd1	intron	protein_coding	KNOWN	NA	NA	no
chr6	28488206	28488266	8441[gene=ENSMUSG00000001424][PH=7][PH0=0.31][P=3.5e-03]	7	+	2	ENSMUSG00000001424	Snd1	intron	protein_coding	KNOWN	NA	NA	no
chr6	28888760	28888820	15425[gene=ENSMUSG00000001424][PH=9][PH0=0.31][P=6.2e-06]	9	+	3	ENSMUSG00000001424	Snd1	3'UTR|intron	protein_coding	KNOWN	NA	NA	yes
chr6	28482686	28482746	8242[gene=ENSMUSG00000001424][PH=7][PH0=0.31][P=3.5e-03]	7	+	2	ENSMUSG00000001424	Snd1	intron	protein_coding	KNOWN	NA	NA	no
chr6	28809050	28809110	14193[gene=ENSMUSG00000001424][PH=9][PH0=0.31][P=6.2e-06]	9	+	2	ENSMUSG00000001424	Snd1	intron	protein_coding	KNOWN	NA	NA	no
chr6	28888559	28888619	15401[gene=ENSMUSG00000001424][PH=16][PH0=0.31][P=1.0e-100]	16	+	4	ENSMUSG00000001424	Snd1	3'UTR|intron	protein_coding	KNOWN	NA	NA	yes
chr11	97161972	97162032	73924[gene=ENSMUSG00000001440][PH=6][PH0=0.30][P=3.9e-03]	6	-	4	ENSMUSG00000001440	Kpnb1	3'UTR	protein_coding	KNOWN	NA	NA	no
chr11	97159893	97159953	73845[gene=ENSMUSG00000001440][PH=6][PH0=0.30][P=3.9e-03]	6	-	3	ENSMUSG00000001440	Kpnb1	3'UTR	protein_coding	KNOWN	NA	NA	no
chr11	97163935	97163995	73966[gene=ENSMUSG00000001440][PH=6][PH0=0.30][P=3.9e-03]	6	-	2	ENSMUSG00000001440	Kpnb1	CDS	protein_coding	KNOWN	NA	NA	yes
chr11	97161532	97161592	73886[gene=ENSMUSG00000001440][PH=6][PH0=0.30][P=3.9e-03]	6	-	3	ENSMUSG00000001440	Kpnb1	3'UTR	protein_coding	KNOWN	NA	NA	no
chr11	97235047	97235107	74617[gene=ENSMUSG00000001441][PH=7][PH0=0.18][P=1.6e-05]	7	-	3	ENSMUSG00000001441	Npepps	3'UTR|CDS	protein_coding	KNOWN	NA	NA	yes
chr11	97205942	97206002	74366[gene=ENSMUSG00000001441][PH=6][PH0=0.18][P=5.1e-04]	6	-	3	ENSMUSG00000001441	Npepps	3'UTR	protein_coding	KNOWN	NA	NA	no
chr11	97098063	97098123	73050[gene=ENSMUSG00000001444][PH=22][PH0=0.46][P=1.0e-100]	22	-	4	ENSMUSG00000001444	Tbx21	3'UTR	protein_coding	KNOWN	NA	NA	yes
chr11	97108255	97108315	73358[gene=ENSMUSG00000001444][PH=7][PH0=0.46][P=2.5e-03]	7	-	2	ENSMUSG00000001444	Tbx21	intron	protein_coding	KNOWN	NA	NA	no
chr11	97108237	97108297	73355[gene=ENSMUSG00000001444][PH=8][PH0=0.46][P=1.6e-04]	8	-	2	ENSMUSG00000001444	Tbx21	intron	protein_coding	KNOWN	NA	NA	no
chr11	97098741	97098801	73106[gene=ENSMUSG00000001444][PH=9][PH0=0.46][P=9.5e-06]	9	-	3	ENSMUSG00000001444	Tbx21	3'UTR|CDS	protein_coding	KNOWN	NA	NA	yes
chr11	97048985	97049045	90887[gene=ENSMUSG00000001445][PH=4][PH0=0.04][P=2.7e-04]	4	+	3	ENSMUSG00000001445	Mrpl10	3'UTR	protein_coding	KNOWN	NA	NA	yes
chr5	4087809	4087869	1619[gene=ENSMUSG00000001467][PH=6][PH0=0.24][P=1.0e-03]	6	-	2	ENSMUSG00000001467	Cyp51	CDS|intron	protein_coding	KNOWN	NA	NA	no
chr5	4083157	4083217	1580[gene=ENSMUSG00000001467][PH=8][PH0=0.24][P=1.4e-06]	8	-	2	ENSMUSG00000001467	Cyp51	CDS	protein_coding	KNOWN	NA	NA	no
chr5	4099197	4099257	1712[gene=ENSMUSG00000001467][PH=7][PH0=0.24][P=4.0e-05]	7	-	3	ENSMUSG00000001467	Cyp51	CDS|intron	protein_coding	KNOWN	NA	NA	no
chr5	4100154	4100214	1733[gene=ENSMUSG00000001467][PH=6][PH0=0.24][P=1.0e-03]	6	-	3	ENSMUSG00000001467	Cyp51	CDS|intron	protein_coding	KNOWN	NA	NA	no
chr5	4083097	4083157	1566[gene=ENSMUSG00000001467][PH=6][PH0=0.24][P=1.0e-03]	6	-	4	ENSMUSG00000001467	Cyp51	3'UTR|CDS	protein_coding	KNOWN	NA	NA	no
chr5	4092422	4092482	1677[gene=ENSMUSG00000001467][PH=6][PH0=0.24][P=1.0e-03]	6	-	3	ENSMUSG00000001467	Cyp51	CDS	protein_coding	KNOWN	NA	NA	no
chr5	4083133	4083193	1574[gene=ENSMUSG00000001467][PH=6][PH0=0.24][P=1.0e-03]	6	-	2	ENSMUSG00000001467	Cyp51	CDS	protein_coding	KNOWN	NA	NA	no
chr5	4082935	4082995	1548[gene=ENSMUSG00000001467][PH=10][PH0=0.24][P=1.1e-09]	10	-	4	ENSMUSG00000001467	Cyp51	3'UTR	protein_coding	KNOWN	NA	NA	no
chr5	4099178	4099238	1708[gene=ENSMUSG00000001467][PH=6][PH0=0.24][P=1.0e-03]	6	-	2	ENSMUSG00000001467	Cyp51	CDS|intron	protein_coding	KNOWN	NA	NA	no
chr8	123375103	123375163	62621[gene=ENSMUSG00000010154][PH=3][PH0=0.01][P=1.7e-03]	3	+	2	ENSMUSG00000001472	Tcf25	downstream 10K|intron	protein_coding	KNOWN	NA	NA	no
chr6	128321150	128321210	67982[gene=ENSMUSG00000001521][PH=3][PH0=0.01][P=1.5e-03]	3	-	3	ENSMUSG00000001521	Tulp3	3'UTR	protein_coding	KNOWN	NA	NA	no
chr17	35834825	35834885	20776[gene=ENSMUSG00000001525][PH=16][PH0=0.53][P=1.0e-100]	16	-	2	ENSMUSG00000001525	Tubb5	3'UTR	protein_coding	KNOWN	NA	NA	yes
chr17	35834516	35834576	20741[gene=ENSMUSG00000001525][PH=66][PH0=0.53][P=1.0e-100]	66	-	4	ENSMUSG00000001525	Tubb5	3'UTR	protein_coding	KNOWN	NA	NA	yes
chr17	35838034	35838094	20863[gene=ENSMUSG00000001525][PH=14][PH0=0.53][P=4.4e-12]	14	-	3	ENSMUSG00000001525	Tubb5	5'UTR	protein_coding	KNOWN	NA	NA	yes
chr17	35833933	35833993	20660[gene=ENSMUSG00000001525][PH=8][PH0=0.53][P=2.4e-04]	8	-	4	ENSMUSG00000001525	Tubb5	3'UTR	protein_coding	KNOWN	NA	NA	yes
chr13	75771953	75772013	50744[gene=ENSMUSG00000001542][PH=10][PH0=0.68][P=5.1e-05]	10	+	3	ENSMUSG00000001542	Ell2	3'UTR	protein_coding	KNOWN	NA	NA	yes
chr13	75710496	75710556	48621[gene=ENSMUSG00000001542][PH=10][PH0=0.68][P=5.1e-05]	10	+	4	ENSMUSG00000001542	Ell2	intron	protein_coding	KNOWN	NA	NA	no
chr13	75770824	75770884	50588[gene=ENSMUSG00000001542][PH=40][PH0=0.68][P=4.2e-13]	40	+	4	ENSMUSG00000001542	Ell2	3'UTR	protein_coding	KNOWN	NA	NA	yes
chr13	75772163	75772223	50786[gene=ENSMUSG00000001542][PH=12][PH0=0.68][P=2.1e-07]	12	+	4	ENSMUSG00000001542	Ell2	3'UTR	protein_coding	KNOWN	NA	NA	no
chr13	75731128	75731188	49307[gene=ENSMUSG00000001542][PH=22][PH0=0.68][P=4.2e-13]	22	+	4	ENSMUSG00000001542	Ell2	intron	protein_coding	KNOWN	NA	NA	yes
chr13	75771476	75771536	50688[gene=ENSMUSG00000001542][PH=8][PH0=0.68][P=7.8e-03]	8	+	2	ENSMUSG00000001542	Ell2	3'UTR	protein_coding	KNOWN	NA	NA	no
chr13	75771838	75771898	50721[gene=ENSMUSG00000001542][PH=9][PH0=0.68][P=6.7e-04]	9	+	3	ENSMUSG00000001542	Ell2	3'UTR	protein_coding	KNOWN	NA	NA	no
chr13	75772032	75772092	50759[gene=ENSMUSG00000001542][PH=11][PH0=0.68][P=3.4e-06]	11	+	3	ENSMUSG00000001542	Ell2	3'UTR	protein_coding	KNOWN	NA	NA	no
chr5	29451332	29451392	9319[gene=ENSMUSG00000001569][PH=7][PH0=0.12][P=3.6e-07]	7	+	2	ENSMUSG00000001569	Nom1	3'UTR	protein_coding	KNOWN	NA	NA	yes
chr4	136253823	136253883	71238[gene=ENSMUSG00000036995][PH=2][PH0=0.00][P=3.2e-03]	2	+	2	ENSMUSG00000001604	Tcea3	downstream 10K|intron	protein_coding	KNOWN	NA	NA	yes
chr12	40207065	40207125	7488[gene=ENSMUSG00000001627][PH=6][PH0=0.26][P=2.5e-03]	6	-	2	ENSMUSG00000001627	Ifrd1	3'UTR|CDS	protein_coding	KNOWN	NA	NA	no
chr12	40203144	40203204	7321[gene=ENSMUSG00000001627][PH=27][PH0=0.26][P=1.0e-100]	27	-	4	ENSMUSG00000001627	Ifrd1	3'UTR	protein_coding	KNOWN	NA	NA	yes
chr12	40203265	40203325	7375[gene=ENSMUSG00000001627][PH=20][PH0=0.26][P=1.0e-100]	20	-	4	ENSMUSG00000001627	Ifrd1	3'UTR	protein_coding	KNOWN	NA	NA	yes
chr12	40212039	40212099	7648[gene=ENSMUSG00000001627][PH=6][PH0=0.26][P=2.5e-03]	6	-	3	ENSMUSG00000001627	Ifrd1	downstream 10K|intron	protein_coding	KNOWN	NA	NA	no
chr6	113324789	113324849	56133[gene=ENSMUSG00000001632][PH=6][PH0=0.06][P=1.8e-07]	6	+	3	ENSMUSG00000001632	Brpf1	3'UTR	protein_coding	KNOWN	NA	NA	yes
chr10	75771219	75771279	48431[gene=ENSMUSG00000001666][PH=4][PH0=0.10][P=5.1e-03]	4	-	3	ENSMUSG00000001666	Ddt	3'UTR	protein_coding	KNOWN	NA	NA	no
chr10	75771314	75771374	48440[gene=ENSMUSG00000001665][PH=3][PH0=0.03][P=8.2e-03]	3	-	2	ENSMUSG00000001666	Ddt	3'UTR	protein_coding	KNOWN	NA	NA	no
chr5	148505749	148505809	63360[gene=ENSMUSG00000001687][PH=7][PH0=0.38][P=1.5e-03]	7	-	2	ENSMUSG00000001687	Ubl3	3'UTR	protein_coding	KNOWN	NA	NA	no
chr5	148504736	148504796	63248[gene=ENSMUSG00000001687][PH=7][PH0=0.38][P=1.5e-03]	7	-	4	ENSMUSG00000001687	Ubl3	3'UTR	protein_coding	KNOWN	NA	NA	no
chr5	148505168	148505228	63328[gene=ENSMUSG00000001687][PH=12][PH0=0.38][P=2.1e-10]	12	-	4	ENSMUSG00000001687	Ubl3	3'UTR	protein_coding	KNOWN	NA	NA	yes
chr5	148504632	148504692	63231[gene=ENSMUSG00000001687][PH=20][PH0=0.38][P=1.0e-100]	20	-	4	ENSMUSG00000001687	Ubl3	3'UTR	protein_coding	KNOWN	NA	NA	yes
chr5	148504781	148504841	63257[gene=ENSMUSG00000001687][PH=8][PH0=0.38][P=8.1e-05]	8	-	4	ENSMUSG00000001687	Ubl3	3'UTR	protein_coding	KNOWN	NA	NA	no
chr5	148543445	148543505	63981[gene=ENSMUSG00000001687][PH=7][PH0=0.38][P=1.5e-03]	7	-	4	ENSMUSG00000001687	Ubl3	intron	protein_coding	KNOWN	NA	NA	no
chr5	148552067	148552127	64223[gene=ENSMUSG00000001687][PH=14][PH0=0.38][P=1.0e-100]	14	-	3	ENSMUSG00000001687	Ubl3	5'UTR|intron	protein_coding	KNOWN	NA	NA	yes
chr5	148504996	148505056	63289[gene=ENSMUSG00000001687][PH=10][PH0=0.38][P=1.6e-07]	10	-	4	ENSMUSG00000001687	Ubl3	3'UTR	protein_coding	KNOWN	NA	NA	yes
chr13	38645963	38646023	13945[gene=ENSMUSG00000001707][PH=14][PH0=0.57][P=2.0e-11]	14	-	3	ENSMUSG00000001707	Eef1e1	3'UTR	protein_coding	KNOWN	NA	NA	yes
chr13	38645759	38645819	13888[gene=ENSMUSG00000001707][PH=145][PH0=0.57][P=1.0e-100]	145	-	4	ENSMUSG00000001707	Eef1e1	3'UTR	protein_coding	KNOWN	NA	NA	yes
chr13	38646025	38646085	13970[gene=ENSMUSG00000001707][PH=13][PH0=0.57][P=4.6e-10]	13	-	3	ENSMUSG00000001707	Eef1e1	3'UTR	protein_coding	KNOWN	NA	NA	yes
chr12	112654427	112654487	43662[gene=ENSMUSG00000001729][PH=12][PH0=0.07][P=1.0e-100]	12	-	4	ENSMUSG00000001729	Akt1	3'UTR	protein_coding	KNOWN	NA	NA	yes
chr2	145918306	145918366	92806[gene=ENSMUSG00000001767][PH=4][PH0=0.05][P=5.4e-04]	4	-	3	ENSMUSG00000001767	Crnkl1	3'UTR	protein_coding	KNOWN	NA	NA	no
chr9	18313166	18313226	32742[gene=ENSMUSG00000001774][PH=11][PH0=0.25][P=3.3e-11]	11	+	4	ENSMUSG00000001774	Chordc1	3'UTR	protein_coding	KNOWN	NA	NA	yes
chr10	85957619	85957679	54984[gene=ENSMUSG00000050108][PH=4][PH0=0.04][P=9.3e-04]	4	-	3	ENSMUSG00000001783	Rtcb	CDS|downstream 10K	protein_coding	KNOWN	NA	NA	no
chr10	85955716	85955776	54957[gene=ENSMUSG00000050108][PH=4][PH0=0.04][P=9.3e-04]	4	-	2	ENSMUSG00000001783	Rtcb	CDS|downstream 10K	protein_coding	KNOWN	NA	NA	no
chr10	85938989	85939049	54727[gene=ENSMUSG00000001783][PH=5][PH0=0.20][P=7.0e-03]	5	-	2	ENSMUSG00000001783	Rtcb	CDS	protein_coding	KNOWN	NA	NA	no
chr9	25307920	25307980	38250[gene=ENSMUSG00000001833][PH=23][PH0=0.64][P=1.9e-13]	23	+	4	ENSMUSG00000001833	2017-09-07	3'UTR	protein_coding	KNOWN	NA	NA	yes
chr9	25296412	25296472	37870[gene=ENSMUSG00000001833][PH=15][PH0=0.64][P=1.1e-11]	15	+	4	ENSMUSG00000001833	2017-09-07	CDS	protein_coding	KNOWN	NA	NA	yes
chr9	25293714	25293774	37776[gene=ENSMUSG00000001833][PH=10][PH0=0.64][P=2.5e-05]	10	+	3	ENSMUSG00000001833	2017-09-07	CDS	protein_coding	KNOWN	NA	NA	no
chr9	25301443	25301503	38038[gene=ENSMUSG00000001833][PH=8][PH0=0.64][P=4.4e-03]	8	+	3	ENSMUSG00000001833	2017-09-07	CDS	protein_coding	KNOWN	NA	NA	no
chr9	25308302	25308362	38355[gene=ENSMUSG00000001833][PH=10][PH0=0.64][P=2.5e-05]	10	+	3	ENSMUSG00000001833	2017-09-07	3'UTR	protein_coding	KNOWN	NA	NA	yes
chr9	25307861	25307921	38232[gene=ENSMUSG00000001833][PH=9][PH0=0.64][P=3.6e-04]	9	+	3	ENSMUSG00000001833	2017-09-07	3'UTR	protein_coding	KNOWN	NA	NA	yes
chr9	25307883	25307943	38238[gene=ENSMUSG00000001833][PH=9][PH0=0.64][P=3.6e-04]	9	+	3	ENSMUSG00000001833	2017-09-07	3'UTR	protein_coding	KNOWN	NA	NA	yes
chr9	25257268	25257328	36748[gene=ENSMUSG00000001833][PH=9][PH0=0.64][P=3.6e-04]	9	+	3	ENSMUSG00000001833	2017-09-07	intron	protein_coding	KNOWN	NA	NA	no
chr9	25307638	25307698	38183[gene=ENSMUSG00000001833][PH=8][PH0=0.64][P=4.4e-03]	8	+	3	ENSMUSG00000001833	2017-09-07	3'UTR	protein_coding	KNOWN	NA	NA	no
chr9	25308146	25308206	38317[gene=ENSMUSG00000001833][PH=22][PH0=0.64][P=1.9e-13]	22	+	4	ENSMUSG00000001833	2017-09-07	3'UTR	protein_coding	KNOWN	NA	NA	yes
chr9	25308022	25308082	38285[gene=ENSMUSG00000001833][PH=9][PH0=0.64][P=3.6e-04]	9	+	3	ENSMUSG00000001833	2017-09-07	3'UTR	protein_coding	KNOWN	NA	NA	yes
chr9	25308514	25308574	38391[gene=ENSMUSG00000001833][PH=20][PH0=0.64][P=1.9e-13]	20	+	4	ENSMUSG00000001833	2017-09-07	3'UTR	protein_coding	KNOWN	NA	NA	yes
chr9	25307773	25307833	38202[gene=ENSMUSG00000001833][PH=31][PH0=0.64][P=1.9e-13]	31	+	4	ENSMUSG00000001833	2017-09-07	3'UTR	protein_coding	KNOWN	NA	NA	yes
chr5	143505753	143505813	59181[gene=ENSMUSG00000001847][PH=10][PH0=0.21][P=2.9e-10]	10	-	4	ENSMUSG00000001847	Rac1	3'UTR	protein_coding	KNOWN	NA	NA	yes
chr5	143514439	143514499	59326[gene=ENSMUSG00000001847][PH=6][PH0=0.21][P=4.5e-04]	6	-	3	ENSMUSG00000001847	Rac1	intron	protein_coding	KNOWN	NA	NA	no
chr7	16786335	16786395	2505[gene=ENSMUSG00000001918][PH=7][PH0=0.40][P=1.0e-03]	7	+	2	ENSMUSG00000001918	Slc1a5	CDS	protein_coding	KNOWN	NA	NA	no
chr7	16783911	16783971	2431[gene=ENSMUSG00000001918][PH=8][PH0=0.40][P=5.8e-05]	8	+	3	ENSMUSG00000001918	Slc1a5	intron	protein_coding	KNOWN	NA	NA	no
chr7	16786800	16786860	2531[gene=ENSMUSG00000001918][PH=7][PH0=0.40][P=1.0e-03]	7	+	1	ENSMUSG00000001918	Slc1a5	intron	protein_coding	KNOWN	NA	NA	no
chr7	16785534	16785594	2473[gene=ENSMUSG00000001918][PH=8][PH0=0.40][P=5.8e-05]	8	+	2	ENSMUSG00000001918	Slc1a5	intron	protein_coding	KNOWN	NA	NA	no
chr4	125606152	125606212	58814[gene=ENSMUSG00000001985][PH=2][PH0=0.00][P=6.7e-04]	2	+	3	ENSMUSG00000001985	Grik3	intron	protein_coding	KNOWN	NA	NA	no
chr8	125418247	125418307	40704[gene=ENSMUSG00000001995][PH=5][PH0=0.03][P=1.1e-06]	5	-	3	ENSMUSG00000001995	Sipa1l2	3'UTR	protein_coding	KNOWN	NA	NA	no
chr2	127066884	127066944	98298[gene=ENSMUSG00000001998][PH=5][PH0=0.08][P=1.9e-04]	5	+	4	ENSMUSG00000001998	Ap4e1	3'UTR	protein_coding	KNOWN	NA	NA	no
chr2	127067634	127067694	98325[gene=ENSMUSG00000001998][PH=4][PH0=0.08][P=9.9e-03]	4	+	2	ENSMUSG00000001998	Ap4e1	3'UTR	protein_coding	KNOWN	NA	NA	no
chr2	127013325	127013385	98109[gene=ENSMUSG00000001998][PH=5][PH0=0.08][P=1.9e-04]	5	+	2	ENSMUSG00000001998	Ap4e1	downstream 10K|intron	protein_coding	KNOWN	NA	NA	no
chrX	73788854	73788914	14086[gene=ENSMUSG00000002007][PH=5][PH0=0.04][P=1.1e-06]	5	+	2	ENSMUSG00000002014	Ssr4	CDS|downstream 10K	protein_coding	KNOWN	NA	NA	no
chrX	73695102	73695162	9544[gene=ENSMUSG00000002015][PH=4][PH0=0.08][P=6.7e-03]	4	-	2	ENSMUSG00000002015	Bcap31	intron	protein_coding	KNOWN	NA	NA	no
chrX	73688693	73688753	9508[gene=ENSMUSG00000002015][PH=4][PH0=0.08][P=6.7e-03]	4	-	2	ENSMUSG00000002015	Bcap31	CDS	protein_coding	KNOWN	NA	NA	no
chr17	75537780	75537840	52424[gene=ENSMUSG00000002017][PH=5][PH0=0.15][P=1.9e-03]	5	-	2	ENSMUSG00000002017	Fam98a	3'UTR	protein_coding	KNOWN	NA	NA	yes
chr17	75537758	75537818	52422[gene=ENSMUSG00000002017][PH=5][PH0=0.15][P=1.9e-03]	5	-	2	ENSMUSG00000002017	Fam98a	3'UTR	protein_coding	KNOWN	NA	NA	no
chr9	44806405	44806465	24196[gene=ENSMUSG00000002028][PH=8][PH0=0.16][P=1.5e-07]	8	-	4	ENSMUSG00000002028	Kmt2a	3'UTR	protein_coding	KNOWN	NA	NA	yes
chr9	44878767	44878827	24839[gene=ENSMUSG00000002028][PH=5][PH0=0.16][P=7.6e-03]	5	-	3	ENSMUSG00000002028	Kmt2a	CDS|intron	protein_coding	KNOWN	NA	NA	yes
chr9	44970714	44970774	25121[gene=ENSMUSG00000002033][PH=5][PH0=0.18][P=3.1e-03]	5	-	3	ENSMUSG00000002033	Cd3g	CDS	protein_coding	KNOWN	NA	NA	no
chr9	44974237	44974297	25168[gene=ENSMUSG00000002033][PH=9][PH0=0.18][P=1.8e-09]	9	-	2	ENSMUSG00000002033	Cd3g	CDS	protein_coding	KNOWN	NA	NA	no
chr9	44969728	44969788	25090[gene=ENSMUSG00000002033][PH=22][PH0=0.18][P=1.0e-100]	22	-	4	ENSMUSG00000002033	Cd3g	3'UTR	protein_coding	KNOWN	NA	NA	yes
chr11	78207169	78207229	50734[gene=ENSMUSG00000002052][PH=12][PH0=0.17][P=1.0e-100]	12	-	4	ENSMUSG00000002052	Supt6	3'UTR	protein_coding	KNOWN	NA	NA	yes
chr2	91054975	91055035	78630[gene=ENSMUSG00000002104][PH=3][PH0=0.01][P=4.0e-04]	3	+	1	ENSMUSG00000002102	Psmc3	CDS|downstream 10K|intron	protein_coding	KNOWN	NA	NA	no
chr2	6541939	6541999	3308[gene=ENSMUSG00000002107][PH=4][PH0=0.02][P=2.2e-04]	4	-	3	ENSMUSG00000002107	Celf2	3'UTR	protein_coding	KNOWN	NA	NA	no
chr2	6543118	6543178	3361[gene=ENSMUSG00000002107][PH=9][PH0=0.02][P=2.8e-12]	9	-	3	ENSMUSG00000002107	Celf2	3'UTR	protein_coding	KNOWN	NA	NA	yes
chr2	6544466	6544526	3425[gene=ENSMUSG00000002107][PH=12][PH0=0.02][P=2.8e-12]	12	-	3	ENSMUSG00000002107	Celf2	3'UTR	protein_coding	KNOWN	NA	NA	yes
chr2	6543994	6544054	3397[gene=ENSMUSG00000002107][PH=4][PH0=0.02][P=2.2e-04]	4	-	2	ENSMUSG00000002107	Celf2	3'UTR	protein_coding	KNOWN	NA	NA	no
chr2	6544810	6544870	3444[gene=ENSMUSG00000002107][PH=4][PH0=0.02][P=2.2e-04]	4	-	4	ENSMUSG00000002107	Celf2	3'UTR	protein_coding	KNOWN	NA	NA	no
chr2	6545335	6545395	3470[gene=ENSMUSG00000002107][PH=5][PH0=0.02][P=8.6e-07]	5	-	3	ENSMUSG00000002107	Celf2	3'UTR	protein_coding	KNOWN	NA	NA	no
chr5	27742244	27742304	9071[gene=ENSMUSG00000002221][PH=5][PH0=0.07][P=9.3e-05]	5	-	3	ENSMUSG00000002221	Paxip1	3'UTR	protein_coding	KNOWN	NA	NA	yes
chr5	87837073	87837133	32937[gene=ENSMUSG00000002240][PH=2][PH0=0.00][P=5.1e-03]	2	+	3	ENSMUSG00000002240	4930432K09Rik	intron	protein_coding	KNOWN	NA	NA	yes
chr17	28212760	28212820	19062[gene=ENSMUSG00000024220][PH=4][PH0=0.05][P=1.3e-03]	4	+	3	ENSMUSG00000002257	Def6	downstream 10K|intron	protein_coding	KNOWN	NA	NA	no
chr5	8397058	8397118	1912[gene=ENSMUSG00000002297][PH=4][PH0=0.08][P=5.3e-03]	4	-	2	ENSMUSG00000002297	Dbf4	3'UTR	protein_coding	KNOWN	NA	NA	yes
chr5	8397033	8397093	1909[gene=ENSMUSG00000002297][PH=6][PH0=0.08][P=1.7e-06]	6	-	3	ENSMUSG00000002297	Dbf4	3'UTR	protein_coding	KNOWN	NA	NA	yes
chr14	55635957	55636017	18668[gene=ENSMUSG00000002319][PH=5][PH0=0.06][P=2.5e-05]	5	-	4	ENSMUSG00000002319	Ipo4	3'UTR	protein_coding	KNOWN	NA	NA	no
chr14	55609381	55609441	27593[gene=ENSMUSG00000047098][PH=4][PH0=0.08][P=4.1e-03]	4	+	3	ENSMUSG00000002325	Irf9	3'UTR	protein_coding	KNOWN	NA	NA	no
chr14	55739040	55739100	18822[gene=ENSMUSG00000002332][PH=6][PH0=0.02][P=5.8e-10]	6	-	3	ENSMUSG00000002332	Dhrs1	3'UTR	protein_coding	KNOWN	NA	NA	no
chr8	70182775	70182835	22414[gene=ENSMUSG00000002342][PH=4][PH0=0.03][P=6.5e-05]	4	+	4	ENSMUSG00000002342	Tmem161a	3'UTR	protein_coding	KNOWN	NA	NA	yes
chr2	181688791	181688851	112939[gene=ENSMUSG00000002458][PH=5][PH0=0.07][P=2.6e-05]	5	-	4	ENSMUSG00000002458	Rgs19	3'UTR|intron	protein_coding	KNOWN	NA	NA	yes
chr2	181688765	181688825	112937[gene=ENSMUSG00000002458][PH=4][PH0=0.07][P=1.5e-03]	4	-	4	ENSMUSG00000002458	Rgs19	3'UTR|intron	protein_coding	KNOWN	NA	NA	no
chr16	89788801	89788861	40430[gene=ENSMUSG00000002489][PH=3][PH0=0.01][P=4.8e-03]	3	-	3	ENSMUSG00000002489	Tiam1	3'UTR|intron	protein_coding	KNOWN	NA	NA	no
chr16	89788228	89788288	40419[gene=ENSMUSG00000002489][PH=4][PH0=0.01][P=2.0e-05]	4	-	2	ENSMUSG00000002489	Tiam1	3'UTR|intron	protein_coding	KNOWN	NA	NA	no
chr15	76075874	76075934	46026[gene=ENSMUSG00000075590][PH=3][PH0=0.04][P=9.6e-03]	3	-	2	ENSMUSG00000002524	Puf60	downstream 10K|intron	protein_coding	KNOWN	NA	NA	no
chr11	98437713	98437773	75941[gene=ENSMUSG00000002580][PH=7][PH0=0.04][P=4.5e-11]	7	-	2	ENSMUSG00000002580	Mien1	3'UTR	protein_coding	KNOWN	NA	NA	no
chr7	25687591	25687651	4762[gene=ENSMUSG00000063439][PH=23][PH0=0.55][P=4.4e-14]	23	+	4	ENSMUSG00000002603	Tgfb1	5'UTR|downstream 10K	protein_coding	KNOWN	NA	NA	yes
chr7	25692402	25692462	4974[gene=ENSMUSG00000063439][PH=18][PH0=0.55][P=4.4e-14]	18	+	4	ENSMUSG00000002603	Tgfb1	3'UTR|CDS	protein_coding	KNOWN	NA	NA	yes
chr7	25705010	25705070	5295[gene=ENSMUSG00000002603][PH=66][PH0=0.61][P=1.0e-100]	66	+	4	ENSMUSG00000002603	Tgfb1	3'UTR	protein_coding	KNOWN	NA	NA	yes
chr7	25687722	25687782	4794[gene=ENSMUSG00000063439][PH=18][PH0=0.55][P=4.4e-14]	18	+	3	ENSMUSG00000002603	Tgfb1	5'UTR|downstream 10K	protein_coding	KNOWN	NA	NA	yes
chr7	25687263	25687323	4729[gene=ENSMUSG00000063439][PH=8][PH0=0.55][P=3.6e-04]	8	+	2	ENSMUSG00000002603	Tgfb1	5'UTR|downstream 10K	protein_coding	KNOWN	NA	NA	no
chr7	34184632	34184692	11032[gene=ENSMUSG00000002635][PH=3][PH0=0.03][P=7.3e-03]	3	-	3	ENSMUSG00000002635	Pdcd2l	3'UTR	protein_coding	KNOWN	NA	NA	no
chr11	34068414	34068474	32254[gene=ENSMUSG00000002699][PH=13][PH0=1.81][P=9.5e-04]	13	+	3	ENSMUSG00000002699	Lcp2	CDS	protein_coding	KNOWN	NA	NA	yes
chr11	34091181	34091241	33990[gene=ENSMUSG00000002699][PH=13][PH0=1.81][P=9.5e-04]	13	+	4	ENSMUSG00000002699	Lcp2	3'UTR	protein_coding	KNOWN	NA	NA	yes
chr11	34078518	34078578	32930[gene=ENSMUSG00000002699][PH=17][PH0=1.81][P=2.4e-07]	17	+	3	ENSMUSG00000002699	Lcp2	CDS	protein_coding	KNOWN	NA	NA	yes
chr11	34062435	34062495	31639[gene=ENSMUSG00000002699][PH=12][PH0=1.81][P=6.2e-03]	12	+	4	ENSMUSG00000002699	Lcp2	intron	protein_coding	KNOWN	NA	NA	yes
chr11	34082459	34082519	33195[gene=ENSMUSG00000002699][PH=12][PH0=1.81][P=6.2e-03]	12	+	3	ENSMUSG00000002699	Lcp2	CDS	protein_coding	KNOWN	NA	NA	no
chr11	34054742	34054802	30740[gene=ENSMUSG00000002699][PH=16][PH0=1.81][P=2.1e-06]	16	+	2	ENSMUSG00000002699	Lcp2	intron	protein_coding	KNOWN	NA	NA	yes
chr11	34090849	34090909	33790[gene=ENSMUSG00000002699][PH=170][PH0=1.81][P=1.6e-13]	170	+	4	ENSMUSG00000002699	Lcp2	3'UTR	protein_coding	KNOWN	NA	NA	yes
chr11	34064815	34064875	31858[gene=ENSMUSG00000002699][PH=26][PH0=1.81][P=1.6e-13]	26	+	4	ENSMUSG00000002699	Lcp2	intron	protein_coding	KNOWN	NA	NA	yes
chr11	34090570	34090630	33694[gene=ENSMUSG00000002699][PH=26][PH0=1.81][P=1.6e-13]	26	+	4	ENSMUSG00000002699	Lcp2	CDS|downstream 10K	protein_coding	KNOWN	NA	NA	yes
chr11	34070701	34070761	32450[gene=ENSMUSG00000002699][PH=16][PH0=1.81][P=2.1e-06]	16	+	4	ENSMUSG00000002699	Lcp2	intron	protein_coding	KNOWN	NA	NA	yes
chr11	34054297	34054357	30658[gene=ENSMUSG00000002699][PH=18][PH0=1.81][P=2.6e-08]	18	+	4	ENSMUSG00000002699	Lcp2	CDS	protein_coding	KNOWN	NA	NA	no
chr11	34056273	34056333	30875[gene=ENSMUSG00000002699][PH=13][PH0=1.81][P=9.5e-04]	13	+	3	ENSMUSG00000002699	Lcp2	intron	protein_coding	KNOWN	NA	NA	yes
chr2	166919672	166919732	125173[gene=ENSMUSG00000002718][PH=5][PH0=0.15][P=3.8e-03]	5	+	3	ENSMUSG00000002718	Cse1l	CDS|intron	protein_coding	KNOWN	NA	NA	no
chr2	166907592	166907652	125068[gene=ENSMUSG00000074582][PH=3][PH0=0.02][P=9.9e-03]	3	+	2	ENSMUSG00000002718	Cse1l	downstream 10K|intron	protein_coding	KNOWN	NA	NA	no
chr2	166946200	166946260	125430[gene=ENSMUSG00000002718][PH=5][PH0=0.15][P=3.8e-03]	5	+	3	ENSMUSG00000002718	Cse1l	3'UTR	protein_coding	KNOWN	NA	NA	no
chr2	166915193	166915253	125103[gene=ENSMUSG00000002718][PH=6][PH0=0.15][P=1.2e-04]	6	+	4	ENSMUSG00000002718	Cse1l	CDS|intron	protein_coding	KNOWN	NA	NA	yes
chr2	76696216	76696276	71050[gene=ENSMUSG00000002733][PH=11][PH0=0.15][P=8.9e-14]	11	+	3	ENSMUSG00000002733	Plekha3	3'UTR	protein_coding	KNOWN	NA	NA	yes
chr2	76696472	76696532	71084[gene=ENSMUSG00000002733][PH=9][PH0=0.15][P=4.9e-10]	9	+	4	ENSMUSG00000002733	Plekha3	3'UTR	protein_coding	KNOWN	NA	NA	yes
chr2	76696287	76696347	71065[gene=ENSMUSG00000002733][PH=6][PH0=0.15][P=5.3e-05]	6	+	3	ENSMUSG00000002733	Plekha3	3'UTR	protein_coding	KNOWN	NA	NA	no
chr9	21273455	21273515	33635[gene=ENSMUSG00000002820][PH=7][PH0=0.06][P=2.1e-09]	7	+	3	ENSMUSG00000002820	Atg4d	3'UTR	protein_coding	KNOWN	NA	NA	yes
chr16	38591049	38591109	25891[gene=ENSMUSG00000002845][PH=6][PH0=0.14][P=6.5e-05]	6	+	4	ENSMUSG00000002845	Tmem39a	CDS|downstream 10K|intron	protein_coding	KNOWN	NA	NA	yes
chr16	38591095	38591155	25899[gene=ENSMUSG00000002845][PH=7][PH0=0.14][P=1.5e-06]	7	+	3	ENSMUSG00000002845	Tmem39a	CDS|downstream 10K|intron	protein_coding	KNOWN	NA	NA	yes
chr16	38591227	38591287	25916[gene=ENSMUSG00000002845][PH=7][PH0=0.14][P=1.5e-06]	7	+	3	ENSMUSG00000002845	Tmem39a	3'UTR|intron	protein_coding	KNOWN	NA	NA	no
chr16	38498352	38498412	17520[gene=ENSMUSG00000002846][PH=4][PH0=0.05][P=1.1e-03]	4	-	3	ENSMUSG00000002846	Timmdc1	3'UTR	protein_coding	KNOWN	NA	NA	no
chr16	38518386	38518446	17567[gene=ENSMUSG00000002846][PH=4][PH0=0.05][P=1.1e-03]	4	-	3	ENSMUSG00000002846	Timmdc1	CDS|downstream 10K	protein_coding	KNOWN	NA	NA	yes
chr16	38521280	38521340	17593[gene=ENSMUSG00000002846][PH=4][PH0=0.05][P=1.1e-03]	4	-	3	ENSMUSG00000002846	Timmdc1	downstream 10K|intron	protein_coding	KNOWN	NA	NA	no
chr6	88883459	88883519	40830[gene=ENSMUSG00000002870][PH=4][PH0=0.05][P=8.6e-04]	4	-	4	ENSMUSG00000002870	Mcm2	3'UTR	protein_coding	KNOWN	NA	NA	yes
chr6	88883784	88883844	40849[gene=ENSMUSG00000002870][PH=4][PH0=0.05][P=8.6e-04]	4	-	3	ENSMUSG00000002870	Mcm2	3'UTR	protein_coding	KNOWN	NA	NA	no
chr6	88883597	88883657	40839[gene=ENSMUSG00000002870][PH=5][PH0=0.05][P=1.2e-05]	5	-	3	ENSMUSG00000002870	Mcm2	3'UTR	protein_coding	KNOWN	NA	NA	no
chr6	88906376	88906436	47511[gene=ENSMUSG00000002871][PH=3][PH0=0.02][P=2.5e-03]	3	+	2	ENSMUSG00000002871	Tpra1	intron	protein_coding	KNOWN	NA	NA	no
chr8	83728132	83728192	19591[gene=ENSMUSG00000002885][PH=5][PH0=0.18][P=4.5e-03]	5	-	2	ENSMUSG00000002885	Cd97	CDS|downstream 10K	protein_coding	KNOWN	NA	NA	no
chr8	83724443	83724503	19556[gene=ENSMUSG00000002885][PH=8][PH0=0.18][P=1.3e-07]	8	-	2	ENSMUSG00000002885	Cd97	CDS|downstream 10K	protein_coding	KNOWN	NA	NA	no
chr8	83724477	83724537	19561[gene=ENSMUSG00000002885][PH=5][PH0=0.18][P=4.5e-03]	5	-	2	ENSMUSG00000002885	Cd97	CDS|downstream 10K	protein_coding	KNOWN	NA	NA	no
chr8	83723373	83723433	19514[gene=ENSMUSG00000002885][PH=9][PH0=0.18][P=2.9e-09]	9	-	4	ENSMUSG00000002885	Cd97	3'UTR	protein_coding	KNOWN	NA	NA	yes
chr6	120482592	120482652	59617[gene=ENSMUSG00000002897][PH=12][PH0=0.19][P=8.6e-14]	12	+	3	ENSMUSG00000002897	Il17ra	3'UTR	protein_coding	KNOWN	NA	NA	yes
chr6	120483668	120483728	59693[gene=ENSMUSG00000002897][PH=7][PH0=0.19][P=7.7e-06]	7	+	2	ENSMUSG00000002897	Il17ra	3'UTR	protein_coding	KNOWN	NA	NA	no
chr6	120482888	120482948	59643[gene=ENSMUSG00000002897][PH=11][PH0=0.19][P=2.0e-12]	11	+	4	ENSMUSG00000002897	Il17ra	3'UTR	protein_coding	KNOWN	NA	NA	yes
chr8	4246118	4246178	395[gene=ENSMUSG00000046589][PH=5][PH0=0.09][P=1.1e-04]	5	+	3	ENSMUSG00000002948	Map2k7	3'UTR|intron	protein_coding	KNOWN	NA	NA	yes
chr8	4247146	4247206	426[gene=ENSMUSG00000046589][PH=4][PH0=0.09][P=4.9e-03]	4	+	2	ENSMUSG00000002948	Map2k7	3'UTR|intron	protein_coding	KNOWN	NA	NA	no
chr8	4259745	4259805	362[gene=ENSMUSG00000002949][PH=5][PH0=0.07][P=3.5e-05]	5	-	3	ENSMUSG00000002949	Timm44	3'UTR	protein_coding	KNOWN	NA	NA	no
chr7	19622895	19622955	3874[gene=ENSMUSG00000002983][PH=5][PH0=0.17][P=4.0e-03]	5	-	2	ENSMUSG00000002983	Relb	CDS|downstream 10K|intron	protein_coding	KNOWN	NA	NA	no
chr7	19618842	19618902	3795[gene=ENSMUSG00000002983][PH=7][PH0=0.17][P=3.9e-06]	7	-	2	ENSMUSG00000002983	Relb	intron	protein_coding	KNOWN	NA	NA	no
chr7	19707978	19708038	4147[gene=ENSMUSG00000062300][PH=4][PH0=0.04][P=5.8e-04]	4	-	3	ENSMUSG00000002984	Tomm40	downstream 10K|intron	protein_coding	KNOWN	NA	NA	no
chr7	19701322	19701382	4097[gene=ENSMUSG00000002984][PH=5][PH0=0.12][P=5.9e-04]	5	-	3	ENSMUSG00000002984	Tomm40	3'UTR	protein_coding	KNOWN	NA	NA	yes
chr6	134925252	134925312	72620[gene=ENSMUSG00000003031][PH=5][PH0=0.09][P=1.0e-04]	5	+	2	ENSMUSG00000003031	Cdkn1b	3'UTR	protein_coding	KNOWN	NA	NA	yes
chr6	134925280	134925340	72627[gene=ENSMUSG00000003031][PH=6][PH0=0.09][P=1.9e-06]	6	+	3	ENSMUSG00000003031	Cdkn1b	3'UTR	protein_coding	KNOWN	NA	NA	yes
chr13	19357985	19358045	6389[gene=ENSMUSG00000003062][PH=4][PH0=0.03][P=9.1e-05]	4	-	3	ENSMUSG00000003062	Stard3nl	3'UTR	protein_coding	KNOWN	NA	NA	yes
chr10	80116364	80116424	55192[gene=ENSMUSG00000003068][PH=5][PH0=0.09][P=1.5e-04]	5	+	2	ENSMUSG00000003068	Stk11	5'UTR	protein_coding	KNOWN	NA	NA	yes
chr7	17004658	17004718	2592[gene=ENSMUSG00000003099][PH=7][PH0=0.12][P=3.0e-07]	7	-	3	ENSMUSG00000003099	Ppp5c	3'UTR	protein_coding	KNOWN	NA	NA	no
chr7	17004955	17005015	2613[gene=ENSMUSG00000003099][PH=8][PH0=0.12][P=5.0e-09]	8	-	3	ENSMUSG00000003099	Ppp5c	3'UTR	protein_coding	KNOWN	NA	NA	yes
chr11	98252750	98252810	92198[gene=ENSMUSG00000003119][PH=7][PH0=0.13][P=1.8e-06]	7	+	3	ENSMUSG00000003119	Cdk12	downstream 10K|intron	protein_coding	KNOWN	NA	NA	no
chr9	45968207	45968267	26024[gene=ENSMUSG00000003131][PH=13][PH0=0.31][P=2.5e-13]	13	-	4	ENSMUSG00000003131	Pafah1b2	3'UTR	protein_coding	KNOWN	NA	NA	yes
chr9	45967687	45967747	25980[gene=ENSMUSG00000003131][PH=13][PH0=0.31][P=2.5e-13]	13	-	4	ENSMUSG00000003131	Pafah1b2	3'UTR	protein_coding	KNOWN	NA	NA	yes
chr9	45965502	45965562	25885[gene=ENSMUSG00000003131][PH=10][PH0=0.31][P=1.2e-08]	10	-	4	ENSMUSG00000003131	Pafah1b2	3'UTR	protein_coding	KNOWN	NA	NA	yes
chr9	45975119	45975179	26151[gene=ENSMUSG00000003131][PH=9][PH0=0.31][P=3.5e-07]	9	-	3	ENSMUSG00000003131	Pafah1b2	CDS	protein_coding	KNOWN	NA	NA	yes
chr6	122736573	122736633	63473[gene=ENSMUSG00000003153][PH=5][PH0=0.11][P=1.1e-03]	5	-	2	ENSMUSG00000003153	Slc2a3	3'UTR|CDS	protein_coding	KNOWN	NA	NA	no
chr6	122729386	122729446	63352[gene=ENSMUSG00000003153][PH=52][PH0=0.11][P=1.0e-100]	52	-	4	ENSMUSG00000003153	Slc2a3	3'UTR	protein_coding	KNOWN	NA	NA	yes
chr6	122742368	122742428	63559[gene=ENSMUSG00000003153][PH=5][PH0=0.11][P=1.1e-03]	5	-	2	ENSMUSG00000003153	Slc2a3	5'UTR|intron	protein_coding	KNOWN	NA	NA	no
chr6	122843058	122843118	60317[gene=ENSMUSG00000003154][PH=3][PH0=0.02][P=3.5e-03]	3	+	2	ENSMUSG00000003154	Foxj2	3'UTR	protein_coding	KNOWN	NA	NA	no
chr5	8067708	8067768	4537[gene=ENSMUSG00000003161][PH=7][PH0=0.06][P=3.1e-09]	7	+	3	ENSMUSG00000003161	Sri	3'UTR	protein_coding	KNOWN	NA	NA	no
chr7	45807574	45807634	15742[gene=ENSMUSG00000003269][PH=10][PH0=0.07][P=1.0e-13]	10	-	4	ENSMUSG00000003269	Cyth2	3'UTR	protein_coding	KNOWN	NA	NA	yes
chr8	111156368	111156428	29951[gene=ENSMUSG00000003316][PH=7][PH0=0.12][P=9.9e-07]	7	-	4	ENSMUSG00000003316	Glg1	3'UTR	protein_coding	KNOWN	NA	NA	yes
chr10	80639103	80639163	56044[gene=ENSMUSG00000003345][PH=4][PH0=0.09][P=6.0e-03]	4	+	3	ENSMUSG00000003345	Csnk1g2	CDS	protein_coding	KNOWN	NA	NA	no
chr10	80640236	80640296	56060[gene=ENSMUSG00000003345][PH=5][PH0=0.09][P=1.3e-04]	5	+	3	ENSMUSG00000003345	Csnk1g2	3'UTR	protein_coding	KNOWN	NA	NA	yes
chr10	80686036	80686096	53188[gene=ENSMUSG00000003348][PH=4][PH0=0.06][P=1.8e-03]	4	-	3	ENSMUSG00000003348	Mob3a	3'UTR	protein_coding	KNOWN	NA	NA	no
chr15	98645210	98645270	62513[gene=ENSMUSG00000003360][PH=6][PH0=0.11][P=8.5e-06]	6	-	3	ENSMUSG00000003360	Ddx23	3'UTR	protein_coding	KNOWN	NA	NA	no
chr7	27532328	27532388	6278[gene=ENSMUSG00000003363][PH=5][PH0=0.03][P=1.4e-06]	5	-	2	ENSMUSG00000003363	Pld3	CDS|downstream 10K	protein_coding	KNOWN	NA	NA	no
chr9	22013481	22013541	36290[gene=ENSMUSG00000003402][PH=5][PH0=0.10][P=1.6e-04]	5	+	2	ENSMUSG00000003402	Prkcsh	downstream 10K|intron	protein_coding	KNOWN	NA	NA	no
chr7	45123017	45123077	14186[gene=ENSMUSG00000003429][PH=582][PH0=1.99][P=3.4e-14]	582	-	4	ENSMUSG00000003429	Rps11	downstream 10K|intron	protein_coding	KNOWN	NA	NA	no
chr7	28323918	28323978	6622[gene=ENSMUSG00000003435][PH=5][PH0=0.12][P=9.0e-04]	5	-	3	ENSMUSG00000003435	Supt5	CDS	protein_coding	KNOWN	NA	NA	no
chr1	172068787	172068847	122198[gene=ENSMUSG00000003458][PH=5][PH0=0.08][P=1.1e-04]	5	-	3	ENSMUSG00000003458	Ncstn	3'UTR|CDS	protein_coding	KNOWN	NA	NA	no
chr1	172066018	172066078	122154[gene=ENSMUSG00000003458][PH=11][PH0=0.08][P=1.0e-100]	11	-	4	ENSMUSG00000003458	Ncstn	3'UTR	protein_coding	KNOWN	NA	NA	no
chr1	172134981	172135041	78333[gene=ENSMUSG00000003464][PH=4][PH0=0.03][P=1.0e-04]	4	+	2	ENSMUSG00000003464	Pex19	3'UTR	protein_coding	KNOWN	NA	NA	yes
chr17	35681649	35681709	20587[gene=ENSMUSG00000003534][PH=5][PH0=0.04][P=5.4e-06]	5	-	2	ENSMUSG00000003534	Ddr1	3'UTR	protein_coding	KNOWN	NA	NA	yes
chr17	35822855	35822915	28060[gene=ENSMUSG00000003541][PH=16][PH0=1.58][P=6.2e-08]	16	+	4	ENSMUSG00000003541	Ier3	3'UTR	protein_coding	KNOWN	NA	NA	yes
chr17	35822526	35822586	27936[gene=ENSMUSG00000003541][PH=128][PH0=1.58][P=3.2e-14]	128	+	4	ENSMUSG00000003541	Ier3	3'UTR	protein_coding	KNOWN	NA	NA	yes
chr7	19303400	19303460	3212[gene=ENSMUSG00000003545][PH=4][PH0=0.11][P=8.2e-03]	4	-	2	ENSMUSG00000003545	Fosb	3'UTR	protein_coding	KNOWN	NA	NA	no
chr7	19303266	19303326	3201[gene=ENSMUSG00000003545][PH=8][PH0=0.11][P=1.3e-09]	8	-	3	ENSMUSG00000003545	Fosb	3'UTR	protein_coding	KNOWN	NA	NA	no
chr2	112543366	112543426	90923[gene=ENSMUSG00000003604][PH=11][PH0=0.07][P=1.0e-100]	11	+	4	ENSMUSG00000003604	Aven	intron	protein_coding	KNOWN	NA	NA	no
chr2	112500946	112501006	90681[gene=ENSMUSG00000080622][PH=4][PH0=0.06][P=5.8e-04]	4	+	2	ENSMUSG00000003604	Aven	intron	protein_coding	KNOWN	NA	NA	no
chr2	127231668	127231728	98532[gene=ENSMUSG00000003660][PH=6][PH0=0.11][P=1.7e-05]	6	+	3	ENSMUSG00000003660	Snrnp200	CDS	protein_coding	KNOWN	NA	NA	yes
chr4	129644108	129644168	47058[gene=ENSMUSG00000003731][PH=4][PH0=0.08][P=7.6e-03]	4	-	2	ENSMUSG00000003731	Kpna6	3'UTR	protein_coding	KNOWN	NA	NA	no
chr4	129647361	129647421	47094[gene=ENSMUSG00000003731][PH=4][PH0=0.08][P=7.6e-03]	4	-	2	ENSMUSG00000003731	Kpna6	3'UTR	protein_coding	KNOWN	NA	NA	no
chr4	129667238	129667298	47158[gene=ENSMUSG00000053730][PH=3][PH0=0.02][P=3.3e-03]	3	-	2	ENSMUSG00000003731	Kpna6	downstream 10K|intron	protein_coding	KNOWN	NA	NA	no
chr10	53907244	53907304	24879[gene=ENSMUSG00000003746][PH=10][PH0=0.98][P=3.6e-03]	10	-	4	ENSMUSG00000003746	Man1a	3'UTR	protein_coding	KNOWN	NA	NA	no
chr10	53906997	53907057	24815[gene=ENSMUSG00000003746][PH=35][PH0=0.98][P=1.0e-100]	35	-	4	ENSMUSG00000003746	Man1a	3'UTR	protein_coding	KNOWN	NA	NA	yes
chr10	53984056	53984116	27940[gene=ENSMUSG00000003746][PH=11][PH0=0.98][P=3.6e-04]	11	-	2	ENSMUSG00000003746	Man1a	intron	protein_coding	KNOWN	NA	NA	no
chr10	54030737	54030797	30444[gene=ENSMUSG00000003746][PH=11][PH0=0.98][P=3.6e-04]	11	-	4	ENSMUSG00000003746	Man1a	CDS	protein_coding	KNOWN	NA	NA	yes
chr10	53906194	53906254	24698[gene=ENSMUSG00000003746][PH=17][PH0=0.98][P=5.7e-11]	17	-	4	ENSMUSG00000003746	Man1a	3'UTR	protein_coding	KNOWN	NA	NA	yes
chr10	53905382	53905442	24576[gene=ENSMUSG00000003746][PH=19][PH0=0.98][P=5.1e-13]	19	-	4	ENSMUSG00000003746	Man1a	3'UTR	protein_coding	KNOWN	NA	NA	yes
chr10	53907325	53907385	24905[gene=ENSMUSG00000003746][PH=15][PH0=0.98][P=1.4e-08]	15	-	4	ENSMUSG00000003746	Man1a	3'UTR	protein_coding	KNOWN	NA	NA	yes
chr10	54030717	54030777	30437[gene=ENSMUSG00000003746][PH=10][PH0=0.98][P=3.6e-03]	10	-	4	ENSMUSG00000003746	Man1a	CDS	protein_coding	KNOWN	NA	NA	yes
chr10	53988918	53988978	28211[gene=ENSMUSG00000003746][PH=12][PH0=0.98][P=3.2e-05]	12	-	3	ENSMUSG00000003746	Man1a	intron	protein_coding	KNOWN	NA	NA	no
chr10	54066005	54066065	32174[gene=ENSMUSG00000003746][PH=12][PH0=0.98][P=3.2e-05]	12	-	4	ENSMUSG00000003746	Man1a	intron	protein_coding	KNOWN	NA	NA	yes
chr10	54009345	54009405	29476[gene=ENSMUSG00000003746][PH=13][PH0=0.98][P=2.7e-06]	13	-	4	ENSMUSG00000003746	Man1a	intron	protein_coding	KNOWN	NA	NA	yes
chr10	54025726	54025786	30276[gene=ENSMUSG00000003746][PH=18][PH0=0.98][P=3.1e-12]	18	-	3	ENSMUSG00000003746	Man1a	CDS	protein_coding	KNOWN	NA	NA	yes
chr10	54014004	54014064	29816[gene=ENSMUSG00000003746][PH=10][PH0=0.98][P=3.6e-03]	10	-	4	ENSMUSG00000003746	Man1a	intron	protein_coding	KNOWN	NA	NA	yes
chr10	54009363	54009423	29483[gene=ENSMUSG00000003746][PH=11][PH0=0.98][P=3.6e-04]	11	-	3	ENSMUSG00000003746	Man1a	intron	protein_coding	KNOWN	NA	NA	yes
chr10	53907158	53907218	24860[gene=ENSMUSG00000003746][PH=11][PH0=0.98][P=3.6e-04]	11	-	3	ENSMUSG00000003746	Man1a	3'UTR	protein_coding	KNOWN	NA	NA	yes
chr10	53985666	53985726	28055[gene=ENSMUSG00000003746][PH=10][PH0=0.98][P=3.6e-03]	10	-	4	ENSMUSG00000003746	Man1a	intron	protein_coding	KNOWN	NA	NA	no
chr18	34599821	34599881	10292[gene=ENSMUSG00000003778][PH=5][PH0=0.09][P=1.7e-04]	5	-	3	ENSMUSG00000003778	Brd8	3'UTR	protein_coding	KNOWN	NA	NA	no
chr8	84869187	84869247	36150[gene=ENSMUSG00000003808][PH=4][PH0=0.10][P=7.3e-03]	4	+	2	ENSMUSG00000003808	Farsa	3'UTR	protein_coding	KNOWN	NA	NA	no
chr8	84839908	84839968	20917[gene=ENSMUSG00000003813][PH=4][PH0=0.07][P=1.4e-03]	4	-	2	ENSMUSG00000003813	Rad23a	downstream 10K|intron	protein_coding	KNOWN	NA	NA	no
chr8	84844703	84844763	21054[gene=ENSMUSG00000003814][PH=8][PH0=0.44][P=7.0e-05]	8	-	3	ENSMUSG00000003814	Calr	CDS	protein_coding	KNOWN	NA	NA	no
chr8	84844416	84844476	21013[gene=ENSMUSG00000003814][PH=7][PH0=0.44][P=1.1e-03]	7	-	3	ENSMUSG00000003814	Calr	CDS	protein_coding	KNOWN	NA	NA	yes
chr8	84846238	84846298	21141[gene=ENSMUSG00000003814][PH=8][PH0=0.44][P=7.0e-05]	8	-	4	ENSMUSG00000003814	Calr	CDS	protein_coding	KNOWN	NA	NA	no
chr8	84844686	84844746	21050[gene=ENSMUSG00000003814][PH=7][PH0=0.44][P=1.1e-03]	7	-	3	ENSMUSG00000003814	Calr	CDS	protein_coding	KNOWN	NA	NA	no
chr8	84844606	84844666	21035[gene=ENSMUSG00000003814][PH=10][PH0=0.44][P=1.9e-07]	10	-	4	ENSMUSG00000003814	Calr	CDS	protein_coding	KNOWN	NA	NA	no
chr8	84846002	84846062	21127[gene=ENSMUSG00000003814][PH=7][PH0=0.44][P=1.1e-03]	7	-	3	ENSMUSG00000003814	Calr	CDS	protein_coding	KNOWN	NA	NA	no
chr8	84844867	84844927	21075[gene=ENSMUSG00000003814][PH=19][PH0=0.44][P=1.0e-100]	19	-	4	ENSMUSG00000003814	Calr	CDS	protein_coding	KNOWN	NA	NA	yes
chr8	107371976	107372036	50523[gene=ENSMUSG00000003847][PH=10][PH0=1.02][P=2.7e-03]	10	+	3	ENSMUSG00000003847	Nfat5	3'UTR|intron	protein_coding	KNOWN	NA	NA	no
chr8	107377821	107377881	51127[gene=ENSMUSG00000003847][PH=12][PH0=1.02][P=2.6e-05]	12	+	3	ENSMUSG00000003847	Nfat5	3'UTR|intron	protein_coding	KNOWN	NA	NA	no
chr8	107372183	107372243	50551[gene=ENSMUSG00000003847][PH=10][PH0=1.02][P=2.7e-03]	10	+	4	ENSMUSG00000003847	Nfat5	3'UTR|intron	protein_coding	KNOWN	NA	NA	no
chr8	107330590	107330650	48509[gene=ENSMUSG00000003847][PH=10][PH0=1.02][P=2.7e-03]	10	+	3	ENSMUSG00000003847	Nfat5	intron	protein_coding	KNOWN	NA	NA	no
chr8	107325969	107326029	48099[gene=ENSMUSG00000003847][PH=10][PH0=1.02][P=2.7e-03]	10	+	4	ENSMUSG00000003847	Nfat5	intron	protein_coding	KNOWN	NA	NA	no
chr8	107377727	107377787	51105[gene=ENSMUSG00000003847][PH=13][PH0=1.02][P=2.2e-06]	13	+	3	ENSMUSG00000003847	Nfat5	3'UTR|intron	protein_coding	KNOWN	NA	NA	yes
chr8	107375131	107375191	50846[gene=ENSMUSG00000003847][PH=13][PH0=1.02][P=2.2e-06]	13	+	3	ENSMUSG00000003847	Nfat5	3'UTR|intron	protein_coding	KNOWN	NA	NA	yes
chr8	107373488	107373548	50717[gene=ENSMUSG00000003847][PH=57][PH0=1.02][P=1.0e-100]	57	+	4	ENSMUSG00000003847	Nfat5	3'UTR|intron	protein_coding	KNOWN	NA	NA	yes
chr8	107330098	107330158	48453[gene=ENSMUSG00000003847][PH=10][PH0=1.02][P=2.7e-03]	10	+	4	ENSMUSG00000003847	Nfat5	intron	protein_coding	KNOWN	NA	NA	no
chr8	107344418	107344478	49660[gene=ENSMUSG00000003847][PH=14][PH0=1.02][P=1.7e-07]	14	+	4	ENSMUSG00000003847	Nfat5	downstream 10K|intron	protein_coding	KNOWN	NA	NA	no
chr8	107332310	107332370	48638[gene=ENSMUSG00000003847][PH=10][PH0=1.02][P=2.7e-03]	10	+	3	ENSMUSG00000003847	Nfat5	intron	protein_coding	KNOWN	NA	NA	no
chr8	107337076	107337136	49132[gene=ENSMUSG00000003847][PH=10][PH0=1.02][P=2.7e-03]	10	+	2	ENSMUSG00000003847	Nfat5	intron	protein_coding	KNOWN	NA	NA	yes
chr8	107371786	107371846	50504[gene=ENSMUSG00000003847][PH=16][PH0=1.02][P=8.6e-10]	16	+	3	ENSMUSG00000003847	Nfat5	3'UTR|intron	protein_coding	KNOWN	NA	NA	no
chr8	107371476	107371536	50436[gene=ENSMUSG00000003847][PH=11][PH0=1.02][P=2.7e-04]	11	+	2	ENSMUSG00000003847	Nfat5	3'UTR|intron	protein_coding	KNOWN	NA	NA	no
chr8	107335367	107335427	48937[gene=ENSMUSG00000003847][PH=15][PH0=1.02][P=1.3e-08]	15	+	4	ENSMUSG00000003847	Nfat5	intron	protein_coding	KNOWN	NA	NA	no
chr7	45461774	45461834	15446[gene=ENSMUSG00000003873][PH=17][PH0=0.10][P=4.3e-14]	17	-	4	ENSMUSG00000003873	Bax	3'UTR	protein_coding	KNOWN	NA	NA	yes
chr7	45461711	45461771	15429[gene=ENSMUSG00000003873][PH=6][PH0=0.10][P=3.4e-06]	6	-	4	ENSMUSG00000003873	Bax	3'UTR	protein_coding	KNOWN	NA	NA	yes
chr15	9507411	9507471	2739[gene=ENSMUSG00000003882][PH=7][PH0=0.44][P=2.4e-03]	7	-	3	ENSMUSG00000003882	Il7r	3'UTR	protein_coding	KNOWN	NA	NA	yes
chr15	9516395	9516455	2930[gene=ENSMUSG00000003882][PH=7][PH0=0.44][P=2.4e-03]	7	-	4	ENSMUSG00000003882	Il7r	CDS	protein_coding	KNOWN	NA	NA	yes
chr15	9516356	9516416	2921[gene=ENSMUSG00000003882][PH=7][PH0=0.44][P=2.4e-03]	7	-	2	ENSMUSG00000003882	Il7r	CDS	protein_coding	KNOWN	NA	NA	no
chr16	36052355	36052415	17093[gene=ENSMUSG00000003955][PH=5][PH0=0.13][P=1.1e-03]	5	-	4	ENSMUSG00000003955	Fam162a	CDS	protein_coding	KNOWN	NA	NA	yes
chr15	76904561	76904621	30326[gene=ENSMUSG00000055041][PH=8][PH0=0.40][P=2.2e-05]	8	+	3	ENSMUSG00000003970	Rpl8	CDS|downstream 10K	protein_coding	KNOWN	NA	NA	no
chr15	76904853	76904913	30356[gene=ENSMUSG00000055041][PH=12][PH0=0.40][P=6.9e-11]	12	+	2	ENSMUSG00000003970	Rpl8	CDS|downstream 10K	protein_coding	KNOWN	NA	NA	no
chr15	76905889	76905949	30425[gene=ENSMUSG00000055041][PH=17][PH0=0.40][P=1.0e-100]	17	+	4	ENSMUSG00000003970	Rpl8	CDS|downstream 10K	protein_coding	KNOWN	NA	NA	yes
chr15	76904312	76904372	30304[gene=ENSMUSG00000055041][PH=6][PH0=0.40][P=5.8e-03]	6	+	2	ENSMUSG00000003970	Rpl8	CDS|downstream 10K	protein_coding	KNOWN	NA	NA	no
chr15	76906253	76906313	30454[gene=ENSMUSG00000055041][PH=8][PH0=0.40][P=2.2e-05]	8	+	3	ENSMUSG00000003970	Rpl8	3'UTR|CDS	protein_coding	KNOWN	NA	NA	no
chr15	76904939	76904999	30381[gene=ENSMUSG00000055041][PH=10][PH0=0.40][P=4.8e-08]	10	+	4	ENSMUSG00000003970	Rpl8	CDS|downstream 10K	protein_coding	KNOWN	NA	NA	no
chr11	100888172	100888232	85089[gene=ENSMUSG00000004040][PH=8][PH0=0.21][P=9.2e-07]	8	-	4	ENSMUSG00000004040	Stat3	3'UTR	protein_coding	KNOWN	NA	NA	no
chr11	100888077	100888137	85077[gene=ENSMUSG00000004040][PH=6][PH0=0.21][P=8.8e-04]	6	-	2	ENSMUSG00000004040	Stat3	3'UTR	protein_coding	KNOWN	NA	NA	yes
chr11	100886804	100886864	85024[gene=ENSMUSG00000004040][PH=15][PH0=0.21][P=1.0e-100]	15	-	3	ENSMUSG00000004040	Stat3	3'UTR	protein_coding	KNOWN	NA	NA	no
chr11	100888510	100888570	85114[gene=ENSMUSG00000004040][PH=8][PH0=0.21][P=9.2e-07]	8	-	3	ENSMUSG00000004040	Stat3	3'UTR	protein_coding	KNOWN	NA	NA	no
chr11	100882265	100882325	94507[gene=ENSMUSG00000004043][PH=10][PH0=0.93][P=4.3e-04]	10	+	3	ENSMUSG00000004043	Stat5a	intron	protein_coding	KNOWN	NA	NA	no
chr11	100885084	100885144	94761[gene=ENSMUSG00000004043][PH=25][PH0=0.93][P=1.0e-13]	25	+	4	ENSMUSG00000004043	Stat5a	3'UTR	protein_coding	KNOWN	NA	NA	yes
chr11	100880304	100880364	94390[gene=ENSMUSG00000004043][PH=9][PH0=0.93][P=4.1e-03]	9	+	4	ENSMUSG00000004043	Stat5a	CDS	protein_coding	KNOWN	NA	NA	no
chr11	100884769	100884829	94698[gene=ENSMUSG00000004043][PH=37][PH0=0.93][P=1.0e-13]	37	+	4	ENSMUSG00000004043	Stat5a	3'UTR	protein_coding	KNOWN	NA	NA	yes
chr11	100884258	100884318	94623[gene=ENSMUSG00000004043][PH=11][PH0=0.93][P=4.1e-05]	11	+	4	ENSMUSG00000004043	Stat5a	3'UTR	protein_coding	KNOWN	NA	NA	yes
chr11	100866171	100866231	93611[gene=ENSMUSG00000004043][PH=12][PH0=0.93][P=3.5e-06]	12	+	3	ENSMUSG00000004043	Stat5a	intron	protein_coding	KNOWN	NA	NA	yes
chr11	100884648	100884708	94665[gene=ENSMUSG00000004043][PH=20][PH0=0.93][P=1.0e-13]	20	+	3	ENSMUSG00000004043	Stat5a	3'UTR	protein_coding	KNOWN	NA	NA	yes
chr11	100870142	100870202	93960[gene=ENSMUSG00000004043][PH=10][PH0=0.93][P=4.3e-04]	10	+	3	ENSMUSG00000004043	Stat5a	intron	protein_coding	KNOWN	NA	NA	no
chr11	100868927	100868987	93856[gene=ENSMUSG00000004043][PH=9][PH0=0.93][P=4.1e-03]	9	+	2	ENSMUSG00000004043	Stat5a	intron	protein_coding	KNOWN	NA	NA	no
chr11	100869006	100869066	93872[gene=ENSMUSG00000004043][PH=10][PH0=0.93][P=4.3e-04]	10	+	3	ENSMUSG00000004043	Stat5a	intron	protein_coding	KNOWN	NA	NA	no
chr16	4707592	4707652	745[gene=ENSMUSG00000004069][PH=4][PH0=0.04][P=4.9e-04]	4	+	1	ENSMUSG00000004069	Dnaja3	3'UTR	protein_coding	KNOWN	NA	NA	no
chr16	4771857	4771917	1505[gene=ENSMUSG00000004071][PH=5][PH0=0.08][P=1.5e-04]	5	-	4	ENSMUSG00000004071	Cdip1	intron	protein_coding	KNOWN	NA	NA	no
chr9	20907259	20907319	3224[gene=ENSMUSG00000004099][PH=7][PH0=0.08][P=4.5e-08]	7	-	4	ENSMUSG00000004099	Dnmt1	3'UTR	protein_coding	KNOWN	NA	NA	yes
chr9	20907202	20907262	3210[gene=ENSMUSG00000004099][PH=15][PH0=0.08][P=1.8e-13]	15	-	3	ENSMUSG00000004099	Dnmt1	3'UTR	protein_coding	KNOWN	NA	NA	yes
chr9	20890782	20890842	33240[gene=ENSMUSG00000004100][PH=304][PH0=1.33][P=1.0e-100]	304	+	4	ENSMUSG00000004100	Ppan	intron	protein_coding	KNOWN	NA	NA	yes
chr9	20889507	20889567	33154[gene=ENSMUSG00000004100][PH=116][PH0=1.33][P=1.0e-100]	116	+	4	ENSMUSG00000004100	Ppan	intron	protein_coding	KNOWN	NA	NA	yes
chr10	60301704	60301764	45066[gene=ENSMUSG00000004207][PH=4][PH0=0.05][P=1.2e-03]	4	+	2	ENSMUSG00000004207	Psap	3'UTR	protein_coding	KNOWN	NA	NA	no
chr19	44836343	44836403	35929[gene=ENSMUSG00000004231][PH=17][PH0=0.01][P=1.0e-100]	17	+	2	ENSMUSG00000004231	Pax2	3'UTR	protein_coding	KNOWN	NA	NA	no
chr6	124742570	124742630	63997[gene=ENSMUSG00000004263][PH=19][PH0=1.10][P=1.0e-100]	19	-	4	ENSMUSG00000004263	Atn1	3'UTR|intron	protein_coding	KNOWN	NA	NA	no
chr6	124741209	124741269	63944[gene=ENSMUSG00000072772][PH=706][PH0=2.32][P=1.0e-100]	706	-	4	ENSMUSG00000004263	Atn1	5'UTR|downstream 10K|intron	protein_coding	KNOWN	NA	NA	no
chr6	124715450	124715510	60760[gene=ENSMUSG00000004264][PH=80][PH0=0.41][P=1.0e-100]	80	+	4	ENSMUSG00000004264	Phb2	intron	protein_coding	KNOWN	NA	NA	yes
chr6	124760699	124760759	64063[gene=ENSMUSG00000004267][PH=3][PH0=0.03][P=4.2e-03]	3	-	2	ENSMUSG00000004267	Eno2	3'UTR	protein_coding	KNOWN	NA	NA	no
chrX	7154860	7154920	51[gene=ENSMUSG00000004317][PH=6][PH0=0.15][P=3.3e-04]	6	-	2	ENSMUSG00000004317	Clcn5	3'UTR	protein_coding	KNOWN	NA	NA	no
chrX	7159404	7159464	160[gene=ENSMUSG00000004317][PH=13][PH0=0.15][P=5.0e-13]	13	-	4	ENSMUSG00000004317	Clcn5	3'UTR	protein_coding	KNOWN	NA	NA	yes
chrX	7241251	7241311	514[gene=ENSMUSG00000076251][PH=4][PH0=0.13][P=9.7e-03]	4	-	2	ENSMUSG00000004317	Clcn5	intron	protein_coding	KNOWN	NA	NA	no
chrX	7241964	7242024	527[gene=ENSMUSG00000004317][PH=6][PH0=0.15][P=3.3e-04]	6	-	3	ENSMUSG00000004317	Clcn5	intron	protein_coding	KNOWN	NA	NA	yes
chr8	60911908	60911968	11051[gene=ENSMUSG00000004319][PH=17][PH0=0.19][P=1.0e-100]	17	-	4	ENSMUSG00000004319	Clcn3	3'UTR	protein_coding	KNOWN	NA	NA	yes
chr8	60910441	60910501	10997[gene=ENSMUSG00000004319][PH=15][PH0=0.19][P=1.0e-100]	15	-	4	ENSMUSG00000004319	Clcn3	3'UTR	protein_coding	KNOWN	NA	NA	yes
chr1	80282618	80282678	40828[gene=ENSMUSG00000004364][PH=15][PH0=0.34][P=2.4e-13]	15	-	4	ENSMUSG00000004364	Cul3	CDS|downstream 10K	protein_coding	KNOWN	NA	NA	yes
chr1	80281423	80281483	40801[gene=ENSMUSG00000004364][PH=9][PH0=0.34][P=2.2e-06]	9	-	4	ENSMUSG00000004364	Cul3	CDS|downstream 10K	protein_coding	KNOWN	NA	NA	yes
chr7	4773429	4773489	722[gene=ENSMUSG00000004371][PH=2][PH0=0.00][P=7.8e-03]	2	-	1	ENSMUSG00000004371	Il11	3'UTR	protein_coding	KNOWN	NA	NA	no
chr11	6265079	6265139	5907[gene=ENSMUSG00000004393][PH=5][PH0=0.11][P=3.1e-04]	5	-	3	ENSMUSG00000004393	Ddx56	downstream 10K|intron	protein_coding	KNOWN	NA	NA	yes
chr6	120907176	120907236	63071[gene=ENSMUSG00000004446][PH=4][PH0=0.08][P=6.7e-03]	4	-	2	ENSMUSG00000004446	Bid	intron	protein_coding	KNOWN	NA	NA	no
chr6	120915956	120916016	63141[gene=ENSMUSG00000004446][PH=4][PH0=0.08][P=6.7e-03]	4	-	3	ENSMUSG00000004446	Bid	intron	protein_coding	KNOWN	NA	NA	no
chr5	122160672	122160732	53982[gene=ENSMUSG00000004455][PH=6][PH0=0.19][P=2.2e-04]	6	+	2	ENSMUSG00000004455	Ppp1cc	intron	protein_coding	KNOWN	NA	NA	yes
chr5	122170459	122170519	54134[gene=ENSMUSG00000004455][PH=6][PH0=0.19][P=2.2e-04]	6	+	2	ENSMUSG00000004455	Ppp1cc	intron	protein_coding	KNOWN	NA	NA	no
chr16	22871826	22871886	9786[gene=ENSMUSG00000004460][PH=10][PH0=0.12][P=1.2e-12]	10	+	3	ENSMUSG00000004460	Dnajb11	3'UTR|intron	protein_coding	KNOWN	NA	NA	no
chr6	52739617	52739677	32168[gene=ENSMUSG00000004535][PH=9][PH0=0.82][P=2.7e-03]	9	+	2	ENSMUSG00000004535	Tax1bp1	CDS	protein_coding	KNOWN	NA	NA	no
chr6	52730277	52730337	31809[gene=ENSMUSG00000004535][PH=11][PH0=0.82][P=2.0e-05]	11	+	3	ENSMUSG00000004535	Tax1bp1	intron	protein_coding	KNOWN	NA	NA	no
chr6	52714670	52714730	31221[gene=ENSMUSG00000004535][PH=10][PH0=0.82][P=2.4e-04]	10	+	3	ENSMUSG00000004535	Tax1bp1	intron	protein_coding	KNOWN	NA	NA	no
chr6	52766345	52766405	33362[gene=ENSMUSG00000004535][PH=24][PH0=0.82][P=1.0e-100]	24	+	4	ENSMUSG00000004535	Tax1bp1	3'UTR	protein_coding	KNOWN	NA	NA	yes
chr6	52741941	52742001	32255[gene=ENSMUSG00000004535][PH=11][PH0=0.82][P=2.0e-05]	11	+	3	ENSMUSG00000004535	Tax1bp1	CDS	protein_coding	KNOWN	NA	NA	no
chr6	52766071	52766131	33317[gene=ENSMUSG00000004535][PH=11][PH0=0.82][P=2.0e-05]	11	+	4	ENSMUSG00000004535	Tax1bp1	3'UTR	protein_coding	KNOWN	NA	NA	no
chr6	52766710	52766770	33453[gene=ENSMUSG00000004535][PH=50][PH0=0.82][P=1.0e-100]	50	+	4	ENSMUSG00000004535	Tax1bp1	3'UTR	protein_coding	KNOWN	NA	NA	no
chr1	131638400	131638460	49703[gene=ENSMUSG00000004552][PH=4][PH0=0.02][P=4.9e-05]	4	+	2	ENSMUSG00000004552	Ctse	5'UTR	protein_coding	KNOWN	NA	NA	no
chr1	131639116	131639176	49716[gene=ENSMUSG00000004552][PH=3][PH0=0.02][P=6.5e-03]	3	+	2	ENSMUSG00000004552	Ctse	intron	protein_coding	KNOWN	NA	NA	no
chr8	3515091	3515151	141[gene=ENSMUSG00000004567][PH=4][PH0=0.04][P=2.1e-04]	4	+	2	ENSMUSG00000004567	Mcoln1	3'UTR	protein_coding	KNOWN	NA	NA	yes
chr7	43437214	43437274	9339[gene=ENSMUSG00000097437][PH=13][PH0=0.27][P=3.2e-14]	13	+	3	ENSMUSG00000004612	Nkg7	5'UTR|downstream 10K	protein_coding	KNOWN	NA	NA	yes
chr7	43437403	43437463	9369[gene=ENSMUSG00000097437][PH=7][PH0=0.27][P=2.9e-05]	7	+	2	ENSMUSG00000004612	Nkg7	CDS|downstream 10K	protein_coding	KNOWN	NA	NA	no
chr7	43438198	43438258	9435[gene=ENSMUSG00000097437][PH=9][PH0=0.27][P=3.8e-08]	9	+	3	ENSMUSG00000004612	Nkg7	3'UTR	protein_coding	KNOWN	NA	NA	yes
chr7	43437786	43437846	9389[gene=ENSMUSG00000097437][PH=8][PH0=0.27][P=1.1e-06]	8	+	3	ENSMUSG00000004612	Nkg7	CDS|downstream 10K	protein_coding	KNOWN	NA	NA	yes
chr7	43438037	43438097	9409[gene=ENSMUSG00000097437][PH=8][PH0=0.27][P=1.1e-06]	8	+	4	ENSMUSG00000004612	Nkg7	CDS|downstream 10K	protein_coding	KNOWN	NA	NA	no
chr6	54198521	54198581	33592[gene=ENSMUSG00000004633][PH=3][PH0=0.00][P=5.3e-06]	3	+	3	ENSMUSG00000004633	Chn2	intron	protein_coding	KNOWN	NA	NA	no
chr5	33648287	33648347	11529[gene=ENSMUSG00000004642][PH=4][PH0=0.06][P=1.1e-03]	4	-	2	ENSMUSG00000004642	Slbp	downstream 10K|intron	protein_coding	KNOWN	NA	NA	no
chr10	79993240	79993300	55066[gene=ENSMUSG00000095615][PH=4][PH0=0.05][P=1.9e-04]	4	+	2	ENSMUSG00000004665	Cnn2	CDS|intron	protein_coding	KNOWN	NA	NA	yes
chr8	71335641	71335701	23791[gene=ENSMUSG00000004677][PH=5][PH0=0.16][P=8.3e-03]	5	+	3	ENSMUSG00000004677	Myo9b	intron	protein_coding	KNOWN	NA	NA	no
chr8	71360249	71360309	24047[gene=ENSMUSG00000004677][PH=5][PH0=0.16][P=8.3e-03]	5	+	3	ENSMUSG00000004677	Myo9b	3'UTR	protein_coding	KNOWN	NA	NA	no
chr12	85124882	85124942	47225[gene=ENSMUSG00000004789][PH=5][PH0=0.17][P=3.8e-03]	5	+	3	ENSMUSG00000004789	Dlst	intron	protein_coding	KNOWN	NA	NA	no
chr12	85134027	85134087	47349[gene=ENSMUSG00000004789][PH=8][PH0=0.17][P=8.5e-08]	8	+	4	ENSMUSG00000004789	Dlst	3'UTR	protein_coding	KNOWN	NA	NA	yes
chr11	61660220	61660280	57053[gene=ENSMUSG00000004837][PH=7][PH0=0.41][P=1.3e-03]	7	+	2	ENSMUSG00000004837	Grap	CDS	protein_coding	KNOWN	NA	NA	no
chr11	61669625	61669685	57348[gene=ENSMUSG00000004837][PH=8][PH0=0.41][P=7.5e-05]	8	+	4	ENSMUSG00000004837	Grap	intron	protein_coding	KNOWN	NA	NA	no
chr16	65539471	65539531	36055[gene=ENSMUSG00000004843][PH=8][PH0=0.05][P=7.8e-12]	8	-	4	ENSMUSG00000004843	Chmp2b	3'UTR	protein_coding	KNOWN	NA	NA	yes
chr5	137035338	137035398	56006[gene=ENSMUSG00000004849][PH=3][PH0=0.03][P=5.6e-03]	3	-	2	ENSMUSG00000004849	Ap1s1	3'UTR	protein_coding	KNOWN	NA	NA	no
chr17	28611432	28611492	10200[gene=ENSMUSG00000004865][PH=6][PH0=0.33][P=7.8e-03]	6	-	3	ENSMUSG00000004865	Srpk1	downstream 10K|intron	protein_coding	KNOWN	NA	NA	no
chr17	28617203	28617263	10301[gene=ENSMUSG00000004865][PH=6][PH0=0.33][P=7.8e-03]	6	-	2	ENSMUSG00000004865	Srpk1	downstream 10K|intron	protein_coding	KNOWN	NA	NA	no
chr1	181816660	181816720	130187[gene=ENSMUSG00000004880][PH=10][PH0=0.25][P=2.2e-09]	10	-	3	ENSMUSG00000004880	Lbr	3'UTR	protein_coding	KNOWN	NA	NA	no
chr1	181815320	181815380	129991[gene=ENSMUSG00000004880][PH=6][PH0=0.25][P=1.6e-03]	6	-	4	ENSMUSG00000004880	Lbr	3'UTR	protein_coding	KNOWN	NA	NA	no
chr1	181816547	181816607	130166[gene=ENSMUSG00000004880][PH=9][PH0=0.25][P=7.6e-08]	9	-	4	ENSMUSG00000004880	Lbr	3'UTR	protein_coding	KNOWN	NA	NA	no
chr1	181838425	181838485	130365[gene=ENSMUSG00000089429][PH=5][PH0=0.15][P=7.0e-04]	5	-	4	ENSMUSG00000004880	Lbr	CDS	protein_coding	KNOWN	NA	NA	no
chr1	181815340	181815400	129995[gene=ENSMUSG00000004880][PH=6][PH0=0.25][P=1.6e-03]	6	-	3	ENSMUSG00000004880	Lbr	3'UTR	protein_coding	KNOWN	NA	NA	no
chr1	181816202	181816262	130091[gene=ENSMUSG00000004880][PH=6][PH0=0.25][P=1.6e-03]	6	-	3	ENSMUSG00000004880	Lbr	3'UTR	protein_coding	KNOWN	NA	NA	no
chr1	181815956	181816016	130052[gene=ENSMUSG00000004880][PH=12][PH0=0.25][P=1.3e-12]	12	-	4	ENSMUSG00000004880	Lbr	3'UTR	protein_coding	KNOWN	NA	NA	no
chr1	181816322	181816382	130118[gene=ENSMUSG00000004880][PH=8][PH0=0.25][P=2.4e-06]	8	-	3	ENSMUSG00000004880	Lbr	3'UTR	protein_coding	KNOWN	NA	NA	no
chr1	181816030	181816090	130071[gene=ENSMUSG00000004880][PH=11][PH0=0.25][P=5.5e-11]	11	-	4	ENSMUSG00000004880	Lbr	3'UTR	protein_coding	KNOWN	NA	NA	yes
chr1	181816272	181816332	130106[gene=ENSMUSG00000004880][PH=7][PH0=0.25][P=6.6e-05]	7	-	3	ENSMUSG00000004880	Lbr	3'UTR	protein_coding	KNOWN	NA	NA	no
chr1	181816462	181816522	130143[gene=ENSMUSG00000004880][PH=11][PH0=0.25][P=5.5e-11]	11	-	4	ENSMUSG00000004880	Lbr	3'UTR	protein_coding	KNOWN	NA	NA	no
chr3	87948866	87948926	41574[gene=ENSMUSG00000004885][PH=4][PH0=0.08][P=2.0e-03]	4	+	2	ENSMUSG00000004885	Crabp2	CDS|downstream 10K	protein_coding	KNOWN	NA	NA	no
chr3	87953326	87953386	41608[gene=ENSMUSG00000004885][PH=13][PH0=0.08][P=1.3e-13]	13	+	4	ENSMUSG00000004885	Crabp2	3'UTR	protein_coding	KNOWN	NA	NA	no
chr3	87868047	87868107	19735[gene=ENSMUSG00000004895][PH=4][PH0=0.06][P=1.6e-03]	4	-	3	ENSMUSG00000004895	Prcc	intron	protein_coding	KNOWN	NA	NA	no
chr3	87916073	87916133	41345[gene=ENSMUSG00000004897][PH=7][PH0=0.21][P=9.8e-06]	7	+	4	ENSMUSG00000004897	Hdgf	3'UTR	protein_coding	KNOWN	NA	NA	no
chr3	87915680	87915740	41325[gene=ENSMUSG00000004897][PH=9][PH0=0.21][P=7.7e-09]	9	+	4	ENSMUSG00000004897	Hdgf	3'UTR	protein_coding	KNOWN	NA	NA	yes
chr10	81153281	81153341	53587[gene=ENSMUSG00000004934][PH=4][PH0=0.02][P=9.5e-06]	4	-	3	ENSMUSG00000004934	Pias4	3'UTR	protein_coding	KNOWN	NA	NA	yes
chr9	64186013	64186073	38899[gene=ENSMUSG00000004936][PH=6][PH0=0.14][P=1.0e-04]	6	-	3	ENSMUSG00000004936	Map2k1	3'UTR	protein_coding	KNOWN	NA	NA	yes
chr6	51463011	51463071	22691[gene=ENSMUSG00000004980][PH=15][PH0=1.13][P=1.0e-08]	15	-	4	ENSMUSG00000004980	Hnrnpa2b1	3'UTR|intron	protein_coding	KNOWN	NA	NA	yes
chr6	51463234	51463294	22743[gene=ENSMUSG00000004980][PH=15][PH0=1.13][P=1.0e-08]	15	-	4	ENSMUSG00000004980	Hnrnpa2b1	downstream 10K|intron	protein_coding	KNOWN	NA	NA	yes
chr6	51461992	51462052	22538[gene=ENSMUSG00000004980][PH=17][PH0=1.13][P=5.6e-11]	17	-	3	ENSMUSG00000004980	Hnrnpa2b1	3'UTR|intron	protein_coding	KNOWN	NA	NA	no
chr6	51461220	51461280	22418[gene=ENSMUSG00000004980][PH=10][PH0=1.13][P=1.3e-03]	10	-	4	ENSMUSG00000004980	Hnrnpa2b1	3'UTR	protein_coding	KNOWN	NA	NA	no
chr6	51463339	51463399	22778[gene=ENSMUSG00000004980][PH=12][PH0=1.13][P=1.6e-05]	12	-	4	ENSMUSG00000004980	Hnrnpa2b1	downstream 10K|intron	protein_coding	KNOWN	NA	NA	no
chr6	51462267	51462327	22581[gene=ENSMUSG00000004980][PH=13][PH0=1.13][P=1.5e-06]	13	-	2	ENSMUSG00000004980	Hnrnpa2b1	3'UTR|intron	protein_coding	KNOWN	NA	NA	no
chr6	51461376	51461436	22451[gene=ENSMUSG00000004980][PH=12][PH0=1.13][P=1.6e-05]	12	-	4	ENSMUSG00000004980	Hnrnpa2b1	3'UTR	protein_coding	KNOWN	NA	NA	no
chr6	51468828	51468888	23268[gene=ENSMUSG00000004980][PH=10][PH0=1.13][P=1.3e-03]	10	-	2	ENSMUSG00000004980	Hnrnpa2b1	intron	protein_coding	KNOWN	NA	NA	no
chr10	78427561	78427621	54293[gene=ENSMUSG00000005054][PH=6][PH0=0.03][P=8.0e-10]	6	+	3	ENSMUSG00000005054	Cstb	3'UTR	protein_coding	KNOWN	NA	NA	yes
chr2	102811433	102811493	66210[gene=ENSMUSG00000005087][PH=90][PH0=0.53][P=1.0e-100]	90	-	4	ENSMUSG00000005087	Cd44	3'UTR	protein_coding	KNOWN	NA	NA	yes
chr2	102813407	102813467	66404[gene=ENSMUSG00000005087][PH=23][PH0=0.53][P=1.0e-100]	23	-	3	ENSMUSG00000005087	Cd44	3'UTR	protein_coding	KNOWN	NA	NA	yes
chr2	102813928	102813988	66510[gene=ENSMUSG00000005087][PH=15][PH0=0.53][P=1.1e-12]	15	-	3	ENSMUSG00000005087	Cd44	3'UTR	protein_coding	KNOWN	NA	NA	no
chr2	102843943	102844003	67248[gene=ENSMUSG00000005087][PH=8][PH0=0.53][P=1.8e-03]	8	-	3	ENSMUSG00000005087	Cd44	intron	protein_coding	KNOWN	NA	NA	no
chr2	102813502	102813562	66442[gene=ENSMUSG00000005087][PH=41][PH0=0.53][P=1.0e-100]	41	-	4	ENSMUSG00000005087	Cd44	3'UTR	protein_coding	KNOWN	NA	NA	yes
chr5	38527579	38527639	12970[gene=ENSMUSG00000005103][PH=6][PH0=0.20][P=5.3e-04]	6	-	3	ENSMUSG00000005103	Wdr1	3'UTR	protein_coding	KNOWN	NA	NA	no
chr5	38529606	38529666	13019[gene=ENSMUSG00000005103][PH=8][PH0=0.20][P=5.3e-07]	8	-	4	ENSMUSG00000005103	Wdr1	CDS	protein_coding	KNOWN	NA	NA	no
chr5	38526944	38527004	12934[gene=ENSMUSG00000005103][PH=12][PH0=0.20][P=2.5e-13]	12	-	4	ENSMUSG00000005103	Wdr1	3'UTR	protein_coding	KNOWN	NA	NA	yes
chr15	66929315	66929375	38724[gene=ENSMUSG00000005125][PH=34][PH0=0.56][P=1.0e-100]	34	-	4	ENSMUSG00000005125	Ndrg1	3'UTR	protein_coding	KNOWN	NA	NA	yes
chr15	66930432	66930492	38832[gene=ENSMUSG00000005125][PH=10][PH0=0.56][P=6.0e-06]	10	-	3	ENSMUSG00000005125	Ndrg1	3'UTR	protein_coding	KNOWN	NA	NA	no
chr15	66930234	66930294	38802[gene=ENSMUSG00000005125][PH=10][PH0=0.56][P=6.0e-06]	10	-	2	ENSMUSG00000005125	Ndrg1	3'UTR	protein_coding	KNOWN	NA	NA	yes
chr8	85086834	85086894	36787[gene=ENSMUSG00000005142][PH=4][PH0=0.09][P=6.1e-03]	4	+	3	ENSMUSG00000005142	Man2b1	CDS|downstream 10K	protein_coding	KNOWN	NA	NA	no
chr11	69735018	69735078	45006[gene=ENSMUSG00000005198][PH=6][PH0=0.15][P=8.5e-05]	6	-	4	ENSMUSG00000005198	Polr2a	CDS	protein_coding	KNOWN	NA	NA	no
chr11	69733987	69734047	44951[gene=ENSMUSG00000005198][PH=8][PH0=0.15][P=4.9e-08]	8	-	4	ENSMUSG00000005198	Polr2a	3'UTR	protein_coding	KNOWN	NA	NA	no
chr2	69194050	69194110	48469[gene=ENSMUSG00000005233][PH=8][PH0=0.04][P=5.0e-13]	8	-	3	ENSMUSG00000005233	Spc25	3'UTR	protein_coding	KNOWN	NA	NA	no
chr16	18812357	18812417	7039[gene=ENSMUSG00000005262][PH=4][PH0=0.09][P=9.7e-03]	4	+	4	ENSMUSG00000005262	Ufd1l	5'UTR|intron	protein_coding	KNOWN	NA	NA	no
chr13	58177576	58177636	37312[gene=ENSMUSG00000005312][PH=7][PH0=0.22][P=2.9e-05]	7	-	4	ENSMUSG00000005312	Ubqln1	3'UTR	protein_coding	KNOWN	NA	NA	yes
chr13	58177503	58177563	37285[gene=ENSMUSG00000005312][PH=41][PH0=0.22][P=1.0e-100]	41	-	4	ENSMUSG00000005312	Ubqln1	3'UTR	protein_coding	KNOWN	NA	NA	yes
chr13	58177784	58177844	37360[gene=ENSMUSG00000005312][PH=18][PH0=0.22][P=1.0e-100]	18	-	4	ENSMUSG00000005312	Ubqln1	3'UTR	protein_coding	KNOWN	NA	NA	yes
chr17	88046417	88046477	60223[gene=ENSMUSG00000005371][PH=9][PH0=0.70][P=1.0e-03]	9	-	3	ENSMUSG00000005371	Fbxo11	intron	protein_coding	KNOWN	NA	NA	no
chr5	135053977	135054037	54220[gene=ENSMUSG00000005378][PH=11][PH0=0.11][P=1.0e-100]	11	-	2	ENSMUSG00000005378	Wbscr22	intron	protein_coding	KNOWN	NA	NA	yes
chr5	135063546	135063606	54299[gene=ENSMUSG00000043614][PH=3][PH0=0.03][P=5.4e-03]	3	-	1	ENSMUSG00000005378	Wbscr22	downstream 10K|intron	protein_coding	KNOWN	NA	NA	no
chr7	25294077	25294137	4598[gene=ENSMUSG00000005442][PH=5][PH0=0.08][P=9.1e-05]	5	+	3	ENSMUSG00000005442	Cic	3'UTR|CDS	protein_coding	KNOWN	NA	NA	yes
chr8	83611654	83611714	35206[gene=ENSMUSG00000005483][PH=6][PH0=0.11][P=4.2e-06]	6	+	4	ENSMUSG00000005483	Dnajb1	3'UTR	protein_coding	KNOWN	NA	NA	yes
chr2	91016764	91016824	78461[gene=ENSMUSG00000005506][PH=8][PH0=0.34][P=4.9e-05]	8	+	3	ENSMUSG00000005506	Celf1	3'UTR	protein_coding	KNOWN	NA	NA	no
chr2	91015314	91015374	78413[gene=ENSMUSG00000005506][PH=11][PH0=0.34][P=2.6e-09]	11	+	4	ENSMUSG00000005506	Celf1	3'UTR|intron	protein_coding	KNOWN	NA	NA	yes
chr2	91013657	91013717	78334[gene=ENSMUSG00000005506][PH=8][PH0=0.34][P=4.9e-05]	8	+	3	ENSMUSG00000005506	Celf1	3'UTR|intron	protein_coding	KNOWN	NA	NA	yes
chr7	13035645	13035705	1251[gene=ENSMUSG00000030380][PH=4][PH0=0.08][P=3.3e-03]	4	-	3	ENSMUSG00000005575	Ube2m	CDS|downstream 10K	protein_coding	KNOWN	NA	NA	no
chr7	13035419	13035479	1230[gene=ENSMUSG00000030380][PH=4][PH0=0.08][P=3.3e-03]	4	-	2	ENSMUSG00000005575	Ube2m	3'UTR	protein_coding	KNOWN	NA	NA	yes
chr7	13035382	13035442	1228[gene=ENSMUSG00000030380][PH=4][PH0=0.08][P=3.3e-03]	4	-	3	ENSMUSG00000005575	Ube2m	3'UTR	protein_coding	KNOWN	NA	NA	no
chr7	13035523	13035583	1240[gene=ENSMUSG00000005575][PH=7][PH0=0.14][P=4.2e-07]	7	-	3	ENSMUSG00000005575	Ube2m	3'UTR	protein_coding	KNOWN	NA	NA	yes
chr7	111076051	111076111	44019[gene=ENSMUSG00000005610][PH=2419][PH0=4.82][P=1.0e-100]	2419	-	4	ENSMUSG00000005610	Eif4g2	intron	protein_coding	KNOWN	NA	NA	no
chr7	111074369	111074429	43839[gene=ENSMUSG00000005610][PH=24][PH0=4.82][P=3.9e-06]	24	-	4	ENSMUSG00000005610	Eif4g2	CDS	protein_coding	KNOWN	NA	NA	yes
chr7	111072547	111072607	43681[gene=ENSMUSG00000005610][PH=37][PH0=4.82][P=1.0e-100]	37	-	4	ENSMUSG00000005610	Eif4g2	3'UTR	protein_coding	KNOWN	NA	NA	yes
chr7	111081527	111081587	44434[gene=ENSMUSG00000005610][PH=43][PH0=4.82][P=1.0e-100]	43	-	4	ENSMUSG00000005610	Eif4g2	5'UTR	protein_coding	KNOWN	NA	NA	yes
chr7	81037801	81037861	26042[gene=ENSMUSG00000005621][PH=5][PH0=0.10][P=4.8e-04]	5	+	3	ENSMUSG00000005621	Zfp592	CDS	protein_coding	KNOWN	NA	NA	yes
chr3	95037625	95037685	22520[gene=ENSMUSG00000005625][PH=4][PH0=0.09][P=5.0e-03]	4	-	2	ENSMUSG00000005625	Psmd4	intron	protein_coding	KNOWN	NA	NA	no
chr6	83306517	83306577	33878[gene=ENSMUSG00000005667][PH=73][PH0=0.32][P=1.0e-100]	73	-	4	ENSMUSG00000005667	Mthfd2	3'UTR	protein_coding	KNOWN	NA	NA	no
chr6	83306410	83306470	33841[gene=ENSMUSG00000005667][PH=7][PH0=0.32][P=1.7e-04]	7	-	3	ENSMUSG00000005667	Mthfd2	3'UTR	protein_coding	KNOWN	NA	NA	no
chr5	75656579	75656639	30768[gene=ENSMUSG00000005672][PH=3][PH0=0.01][P=7.2e-04]	3	+	3	ENSMUSG00000005672	Kit	3'UTR	protein_coding	KNOWN	NA	NA	no
chr10	128361701	128361761	96865[gene=ENSMUSG00000005683][PH=5][PH0=0.12][P=8.2e-04]	5	+	4	ENSMUSG00000005683	Cs	3'UTR	protein_coding	KNOWN	NA	NA	yes
chr10	128361965	128362025	96879[gene=ENSMUSG00000005683][PH=5][PH0=0.12][P=8.2e-04]	5	+	4	ENSMUSG00000005683	Cs	3'UTR	protein_coding	KNOWN	NA	NA	no
chr10	128362192	128362252	96898[gene=ENSMUSG00000005683][PH=13][PH0=0.12][P=1.0e-100]	13	+	4	ENSMUSG00000005683	Cs	3'UTR	protein_coding	KNOWN	NA	NA	yes
chr3	103176380	103176440	52786[gene=ENSMUSG00000007379][PH=4][PH0=0.04][P=7.3e-04]	4	+	2	ENSMUSG00000005687	Bcas2	downstream 10K|intron	protein_coding	KNOWN	NA	NA	no
chr3	103178733	103178793	52815[gene=ENSMUSG00000007379][PH=5][PH0=0.04][P=7.1e-06]	5	+	3	ENSMUSG00000005687	Bcas2	3'UTR	protein_coding	KNOWN	NA	NA	no
chr16	18240139	18240199	9045[gene=ENSMUSG00000005732][PH=6][PH0=0.18][P=9.6e-05]	6	-	3	ENSMUSG00000005732	Ranbp1	CDS	protein_coding	KNOWN	NA	NA	no
chr16	18240716	18240776	9061[gene=ENSMUSG00000005732][PH=14][PH0=0.18][P=1.0e-100]	14	-	3	ENSMUSG00000005732	Ranbp1	intron	protein_coding	KNOWN	NA	NA	yes
chr16	18241833	18241893	9103[gene=ENSMUSG00000005732][PH=5][PH0=0.18][P=2.7e-03]	5	-	2	ENSMUSG00000005732	Ranbp1	CDS	protein_coding	KNOWN	NA	NA	no
chr1	165833600	165833660	71480[gene=ENSMUSG00000005763][PH=11][PH0=1.30][P=3.0e-03]	11	+	2	ENSMUSG00000005763	Cd247	intron	protein_coding	KNOWN	NA	NA	no
chr1	165840405	165840465	71999[gene=ENSMUSG00000005763][PH=19][PH0=1.30][P=1.5e-11]	19	+	4	ENSMUSG00000005763	Cd247	intron	protein_coding	KNOWN	NA	NA	no
chr1	165833612	165833672	71482[gene=ENSMUSG00000005763][PH=11][PH0=1.30][P=3.0e-03]	11	+	2	ENSMUSG00000005763	Cd247	intron	protein_coding	KNOWN	NA	NA	no
chr1	165826315	165826375	70912[gene=ENSMUSG00000005763][PH=11][PH0=1.30][P=3.0e-03]	11	+	3	ENSMUSG00000005763	Cd247	intron	protein_coding	KNOWN	NA	NA	no
chr1	165862012	165862072	73109[gene=ENSMUSG00000005763][PH=82][PH0=1.30][P=5.6e-13]	82	+	4	ENSMUSG00000005763	Cd247	3'UTR|intron	protein_coding	KNOWN	NA	NA	yes
chr1	165861520	165861580	73029[gene=ENSMUSG00000005763][PH=22][PH0=1.30][P=5.6e-13]	22	+	4	ENSMUSG00000005763	Cd247	3'UTR|intron	protein_coding	KNOWN	NA	NA	yes
chr1	165799112	165799172	68724[gene=ENSMUSG00000089829][PH=13][PH0=1.59][P=7.4e-05]	13	+	2	ENSMUSG00000005763	Cd247	intron	protein_coding	KNOWN	NA	NA	no
chr1	165829306	165829366	71124[gene=ENSMUSG00000005763][PH=13][PH0=1.30][P=3.9e-05]	13	+	2	ENSMUSG00000005763	Cd247	intron	protein_coding	KNOWN	NA	NA	no
chr1	165822733	165822793	70640[gene=ENSMUSG00000005763][PH=14][PH0=1.30][P=4.0e-06]	14	+	4	ENSMUSG00000005763	Cd247	intron	protein_coding	KNOWN	NA	NA	no
chr1	165821204	165821264	70479[gene=ENSMUSG00000005763][PH=12][PH0=1.30][P=3.6e-04]	12	+	4	ENSMUSG00000005763	Cd247	intron	protein_coding	KNOWN	NA	NA	no
chr1	165791441	165791501	67746[gene=ENSMUSG00000089829][PH=13][PH0=1.59][P=7.4e-05]	13	+	3	ENSMUSG00000005763	Cd247	intron	protein_coding	KNOWN	NA	NA	no
chr1	165791762	165791822	67793[gene=ENSMUSG00000089829][PH=16][PH0=1.59][P=1.1e-07]	16	+	3	ENSMUSG00000005763	Cd247	intron	protein_coding	KNOWN	NA	NA	no
chr1	165811601	165811661	69715[gene=ENSMUSG00000005763][PH=13][PH0=1.30][P=3.9e-05]	13	+	3	ENSMUSG00000005763	Cd247	intron	protein_coding	KNOWN	NA	NA	yes
chr1	165822768	165822828	70650[gene=ENSMUSG00000005763][PH=11][PH0=1.30][P=3.0e-03]	11	+	4	ENSMUSG00000005763	Cd247	intron	protein_coding	KNOWN	NA	NA	no
chr1	165797832	165797892	68556[gene=ENSMUSG00000089829][PH=13][PH0=1.59][P=7.4e-05]	13	+	3	ENSMUSG00000005763	Cd247	intron	protein_coding	KNOWN	NA	NA	no
chr1	165806277	165806337	69335[gene=ENSMUSG00000005763][PH=15][PH0=1.30][P=3.7e-07]	15	+	2	ENSMUSG00000005763	Cd247	intron	protein_coding	KNOWN	NA	NA	no
chr1	165793245	165793305	67987[gene=ENSMUSG00000089829][PH=12][PH0=1.59][P=5.5e-04]	12	+	2	ENSMUSG00000005763	Cd247	intron	protein_coding	KNOWN	NA	NA	no
chr1	165822462	165822522	70598[gene=ENSMUSG00000005763][PH=11][PH0=1.30][P=3.0e-03]	11	+	4	ENSMUSG00000005763	Cd247	intron	protein_coding	KNOWN	NA	NA	no
chr3	94886472	94886532	22405[gene=ENSMUSG00000005779][PH=4][PH0=0.07][P=1.4e-03]	4	-	2	ENSMUSG00000005779	Psmb4	CDS	protein_coding	KNOWN	NA	NA	no
chr2	122683955	122684015	78804[gene=ENSMUSG00000005802][PH=9][PH0=0.12][P=1.3e-10]	9	-	4	ENSMUSG00000005802	Slc30a4	3'UTR	protein_coding	KNOWN	NA	NA	no
chr3	138478713	138478773	63565[gene=ENSMUSG00000005813][PH=6][PH0=0.24][P=1.3e-03]	6	-	3	ENSMUSG00000005813	Metap1	intron	protein_coding	KNOWN	NA	NA	no
chr17	57190223	57190283	41208[gene=ENSMUSG00000005824][PH=16][PH0=0.34][P=4.2e-14]	16	-	4	ENSMUSG00000005824	Tnfsf14	3'UTR	protein_coding	KNOWN	NA	NA	yes
chr17	57193966	57194026	41346[gene=ENSMUSG00000024164][PH=3][PH0=0.01][P=4.7e-04]	3	-	2	ENSMUSG00000005824	Tnfsf14	CDS|downstream 10K	protein_coding	KNOWN	NA	NA	no
chr17	57189810	57189870	41169[gene=ENSMUSG00000005824][PH=6][PH0=0.34][P=3.3e-03]	6	-	4	ENSMUSG00000005824	Tnfsf14	3'UTR	protein_coding	KNOWN	NA	NA	no
chr17	57193451	57193511	41333[gene=ENSMUSG00000005824][PH=6][PH0=0.34][P=3.3e-03]	6	-	4	ENSMUSG00000005824	Tnfsf14	intron	protein_coding	KNOWN	NA	NA	no
chr16	11202309	11202369	4253[gene=ENSMUSG00000005846][PH=7][PH0=0.34][P=2.4e-04]	7	-	3	ENSMUSG00000005846	Rsl1d1	CDS	protein_coding	KNOWN	NA	NA	no
chr16	11202383	11202443	4264[gene=ENSMUSG00000005846][PH=6][PH0=0.34][P=4.2e-03]	6	-	3	ENSMUSG00000005846	Rsl1d1	CDS	protein_coding	KNOWN	NA	NA	yes
chr16	11202400	11202460	4266[gene=ENSMUSG00000005846][PH=6][PH0=0.34][P=4.2e-03]	6	-	3	ENSMUSG00000005846	Rsl1d1	CDS	protein_coding	KNOWN	NA	NA	yes
chr16	11193303	11193363	4008[gene=ENSMUSG00000005846][PH=6][PH0=0.34][P=4.2e-03]	6	-	3	ENSMUSG00000005846	Rsl1d1	3'UTR	protein_coding	KNOWN	NA	NA	no
chr16	11202690	11202750	4282[gene=ENSMUSG00000005846][PH=6][PH0=0.34][P=4.2e-03]	6	-	3	ENSMUSG00000005846	Rsl1d1	intron	protein_coding	KNOWN	NA	NA	no
chr16	11193264	11193324	3998[gene=ENSMUSG00000005846][PH=11][PH0=0.34][P=6.2e-10]	11	-	4	ENSMUSG00000005846	Rsl1d1	3'UTR	protein_coding	KNOWN	NA	NA	yes
chr2	155846900	155846960	99772[gene=ENSMUSG00000005882][PH=7][PH0=0.06][P=7.1e-09]	7	-	3	ENSMUSG00000005882	Uqcc1	3'UTR	protein_coding	KNOWN	NA	NA	yes
chr1	13371653	13371713	3999[gene=ENSMUSG00000005886][PH=11][PH0=0.16][P=2.1e-12]	11	-	4	ENSMUSG00000005886	Ncoa2	intron	protein_coding	KNOWN	NA	NA	yes
chr6	92122189	92122249	48830[gene=ENSMUSG00000005893][PH=6][PH0=0.12][P=5.0e-05]	6	+	3	ENSMUSG00000005893	Nr2c2	intron	protein_coding	KNOWN	NA	NA	no
chr5	3636933	3636993	3648[gene=ENSMUSG00000005907][PH=4][PH0=0.04][P=3.2e-04]	4	+	3	ENSMUSG00000005907	Pex1	3'UTR	protein_coding	KNOWN	NA	NA	no
chr2	105394714	105394774	71926[gene=ENSMUSG00000005973][PH=5][PH0=0.11][P=3.0e-04]	5	-	4	ENSMUSG00000005973	Rcn1	CDS	protein_coding	KNOWN	NA	NA	no
chr1	150399992	150400052	56387[gene=ENSMUSG00000006005][PH=7][PH0=0.23][P=5.6e-05]	7	+	4	ENSMUSG00000006005	Tpr	intron	protein_coding	KNOWN	NA	NA	no
chr1	150449812	150449872	57028[gene=ENSMUSG00000006005][PH=12][PH0=0.23][P=9.5e-13]	12	+	4	ENSMUSG00000006005	Tpr	3'UTR	protein_coding	KNOWN	NA	NA	yes
chr1	150403886	150403946	56449[gene=ENSMUSG00000006005][PH=6][PH0=0.23][P=1.5e-03]	6	+	2	ENSMUSG00000006005	Tpr	CDS	protein_coding	KNOWN	NA	NA	no
chr7	16116715	16116775	2011[gene=ENSMUSG00000006024][PH=10][PH0=0.15][P=1.1e-11]	10	+	4	ENSMUSG00000006024	Napa	3'UTR	protein_coding	KNOWN	NA	NA	yes
chr11	45909373	45909433	37554[gene=ENSMUSG00000006169][PH=10][PH0=0.39][P=2.7e-07]	10	+	4	ENSMUSG00000006169	Clint1	3'UTR	protein_coding	KNOWN	NA	NA	no
chr11	45909727	45909787	37574[gene=ENSMUSG00000006169][PH=7][PH0=0.39][P=2.2e-03]	7	+	4	ENSMUSG00000006169	Clint1	3'UTR	protein_coding	KNOWN	NA	NA	yes
chr11	45910234	45910294	37616[gene=ENSMUSG00000006169][PH=7][PH0=0.39][P=2.2e-03]	7	+	3	ENSMUSG00000006169	Clint1	3'UTR	protein_coding	KNOWN	NA	NA	no
chr11	45910167	45910227	37599[gene=ENSMUSG00000006169][PH=8][PH0=0.39][P=1.3e-04]	8	+	3	ENSMUSG00000006169	Clint1	3'UTR	protein_coding	KNOWN	NA	NA	yes
chr11	45910288	45910348	37630[gene=ENSMUSG00000006169][PH=8][PH0=0.39][P=1.3e-04]	8	+	3	ENSMUSG00000006169	Clint1	3'UTR	protein_coding	KNOWN	NA	NA	yes
chr11	45910131	45910191	37592[gene=ENSMUSG00000006169][PH=8][PH0=0.39][P=1.3e-04]	8	+	4	ENSMUSG00000006169	Clint1	3'UTR	protein_coding	KNOWN	NA	NA	yes
chr4	141467145	141467205	78632[gene=ENSMUSG00000006215][PH=5][PH0=0.12][P=6.6e-04]	5	+	3	ENSMUSG00000006215	Zbtb17	3'UTR	protein_coding	KNOWN	NA	NA	yes
chr4	141457755	141457815	78554[gene=ENSMUSG00000006215][PH=5][PH0=0.12][P=6.6e-04]	5	+	4	ENSMUSG00000006215	Zbtb17	intron	protein_coding	KNOWN	NA	NA	no
chr5	88756863	88756923	33596[gene=ENSMUSG00000006262][PH=11][PH0=0.23][P=2.6e-11]	11	+	4	ENSMUSG00000006262	Mob1b	3'UTR	protein_coding	KNOWN	NA	NA	yes
chr5	88756435	88756495	33558[gene=ENSMUSG00000006262][PH=16][PH0=0.23][P=1.0e-100]	16	+	4	ENSMUSG00000006262	Mob1b	3'UTR	protein_coding	KNOWN	NA	NA	yes
chr8	69113577	69113637	21811[gene=ENSMUSG00000006273][PH=5][PH0=0.13][P=9.8e-04]	5	+	3	ENSMUSG00000006273	Atp6v1b2	3'UTR	protein_coding	KNOWN	NA	NA	no
chr8	69113649	69113709	21825[gene=ENSMUSG00000006273][PH=10][PH0=0.13][P=1.8e-12]	10	+	4	ENSMUSG00000006273	Atp6v1b2	3'UTR	protein_coding	KNOWN	NA	NA	yes
chr1	74282443	74282503	37856[gene=ENSMUSG00000006299][PH=4][PH0=0.06][P=5.5e-04]	4	-	2	ENSMUSG00000006299	Aamp	CDS|downstream 10K	protein_coding	KNOWN	NA	NA	no
chr1	74288768	74288828	37879[gene=ENSMUSG00000006301][PH=6][PH0=0.06][P=1.9e-07]	6	-	3	ENSMUSG00000006301	Tmbim1	3'UTR	protein_coding	KNOWN	NA	NA	yes
chr1	74268136	74268196	27822[gene=ENSMUSG00000006304][PH=10][PH0=0.40][P=2.1e-07]	10	+	4	ENSMUSG00000006304	Arpc2	3'UTR	protein_coding	KNOWN	NA	NA	no
chr1	74268068	74268128	27800[gene=ENSMUSG00000006304][PH=17][PH0=0.40][P=1.2e-13]	17	+	3	ENSMUSG00000006304	Arpc2	3'UTR	protein_coding	KNOWN	NA	NA	yes
chr1	74248138	74248198	27273[gene=ENSMUSG00000006304][PH=8][PH0=0.40][P=9.3e-05]	8	+	4	ENSMUSG00000006304	Arpc2	CDS	protein_coding	KNOWN	NA	NA	yes
chr1	74267769	74267829	27746[gene=ENSMUSG00000006304][PH=8][PH0=0.40][P=9.3e-05]	8	+	3	ENSMUSG00000006304	Arpc2	3'UTR	protein_coding	KNOWN	NA	NA	yes
chr7	30568866	30568926	9125[gene=ENSMUSG00000006307][PH=6][PH0=0.22][P=6.2e-04]	6	-	3	ENSMUSG00000006307	Kmt2b	3'UTR	protein_coding	KNOWN	NA	NA	yes
chr7	30590916	30590976	9555[gene=ENSMUSG00000006310][PH=7][PH0=0.46][P=1.8e-03]	7	-	2	ENSMUSG00000006310	Zbtb32	intron	protein_coding	KNOWN	NA	NA	no
chr7	30590863	30590923	9542[gene=ENSMUSG00000006310][PH=7][PH0=0.46][P=1.8e-03]	7	-	3	ENSMUSG00000006310	Zbtb32	intron	protein_coding	KNOWN	NA	NA	no
chr7	30590899	30590959	9551[gene=ENSMUSG00000006310][PH=8][PH0=0.46][P=1.2e-04]	8	-	2	ENSMUSG00000006310	Zbtb32	intron	protein_coding	KNOWN	NA	NA	no
chr7	30590643	30590703	9522[gene=ENSMUSG00000006310][PH=7][PH0=0.46][P=1.8e-03]	7	-	2	ENSMUSG00000006310	Zbtb32	CDS|intron	protein_coding	KNOWN	NA	NA	no
chr7	30593137	30593197	9733[gene=ENSMUSG00000006313][PH=3][PH0=0.02][P=9.9e-04]	3	-	2	ENSMUSG00000006310	Zbtb32	downstream 10K|intron	protein_coding	KNOWN	NA	NA	no
chr7	30591835	30591895	9650[gene=ENSMUSG00000006310][PH=7][PH0=0.46][P=1.8e-03]	7	-	3	ENSMUSG00000006310	Zbtb32	5'UTR|CDS|intron	protein_coding	KNOWN	NA	NA	no
chr7	30591760	30591820	9636[gene=ENSMUSG00000006310][PH=7][PH0=0.46][P=1.8e-03]	7	-	3	ENSMUSG00000006310	Zbtb32	CDS|intron	protein_coding	KNOWN	NA	NA	no
chr7	30590840	30590900	9537[gene=ENSMUSG00000006310][PH=8][PH0=0.46][P=1.2e-04]	8	-	3	ENSMUSG00000006310	Zbtb32	intron	protein_coding	KNOWN	NA	NA	no
chr7	3706470	3706530	358[gene=ENSMUSG00000035585][PH=6][PH0=0.19][P=1.4e-04]	6	+	2	ENSMUSG00000006333	Rps9	3'UTR|intron	protein_coding	KNOWN	NA	NA	no
chr7	3705499	3705559	321[gene=ENSMUSG00000035585][PH=7][PH0=0.19][P=4.6e-06]	7	+	4	ENSMUSG00000006333	Rps9	downstream 10K|intron	protein_coding	KNOWN	NA	NA	no
chr12	113153833	113153893	59229[gene=ENSMUSG00000006356][PH=3][PH0=0.04][P=8.5e-03]	3	+	2	ENSMUSG00000006360	Crip1	3'UTR	protein_coding	KNOWN	NA	NA	no
chr12	113153312	113153372	59215[gene=ENSMUSG00000006356][PH=3][PH0=0.04][P=8.5e-03]	3	+	2	ENSMUSG00000006360	Crip1	CDS|downstream 10K	protein_coding	KNOWN	NA	NA	no
chr1	171358107	171358167	73760[gene=ENSMUSG00000006412][PH=7][PH0=0.11][P=1.7e-07]	7	+	3	ENSMUSG00000006412	Pfdn2	3'UTR	protein_coding	KNOWN	NA	NA	no
chr2	167516116	167516176	126459[gene=ENSMUSG00000006418][PH=4][PH0=0.09][P=8.3e-03]	4	+	2	ENSMUSG00000006418	Rnf114	3'UTR	protein_coding	KNOWN	NA	NA	no
chr4	141329305	141329365	78437[gene=ENSMUSG00000006445][PH=4][PH0=0.01][P=2.6e-06]	4	+	3	ENSMUSG00000006445	Epha2	3'UTR	protein_coding	KNOWN	NA	NA	no
chr2	71883413	71883473	69527[gene=ENSMUSG00000006494][PH=11][PH0=0.06][P=1.0e-100]	11	+	4	ENSMUSG00000006494	Pdk1	CDS	protein_coding	KNOWN	NA	NA	yes
chr10	79856301	79856361	54696[gene=ENSMUSG00000006498][PH=6][PH0=0.14][P=2.8e-05]	6	+	2	ENSMUSG00000006498	Ptbp1	intron	protein_coding	KNOWN	NA	NA	no
chr14	30819336	30819396	15288[gene=ENSMUSG00000006527][PH=6][PH0=0.05][P=3.0e-07]	6	+	4	ENSMUSG00000006527	Sfmbt1	3'UTR	protein_coding	KNOWN	NA	NA	yes
chr8	122573077	122573137	62268[gene=ENSMUSG00000006585][PH=4][PH0=0.03][P=2.8e-05]	4	+	3	ENSMUSG00000006585	Cdt1	3'UTR|intron	protein_coding	KNOWN	NA	NA	no
chr7	30435054	30435114	9070[gene=ENSMUSG00000006651][PH=3][PH0=0.02][P=9.0e-04]	3	-	3	ENSMUSG00000006651	Aplp1	3'UTR	protein_coding	KNOWN	NA	NA	yes
chr9	108559853	108559913	93150[gene=ENSMUSG00000006673][PH=12][PH0=0.28][P=7.1e-12]	12	+	4	ENSMUSG00000006673	Qrich1	3'UTR	protein_coding	KNOWN	NA	NA	no
chr9	108560108	108560168	93186[gene=ENSMUSG00000006673][PH=9][PH0=0.28][P=3.0e-07]	9	+	4	ENSMUSG00000006673	Qrich1	3'UTR	protein_coding	KNOWN	NA	NA	yes
chr9	108518573	108518633	92560[gene=ENSMUSG00000032604][PH=10][PH0=0.25][P=1.0e-09]	10	+	3	ENSMUSG00000006673	Qrich1	downstream 10K|intron	protein_coding	KNOWN	NA	NA	no
chr9	108496912	108496972	92398[gene=ENSMUSG00000052911][PH=4][PH0=0.06][P=1.4e-03]	4	+	3	ENSMUSG00000006676	Usp19	CDS|downstream 10K	protein_coding	KNOWN	NA	NA	yes
chr9	108501653	108501713	92453[gene=ENSMUSG00000006676][PH=6][PH0=0.12][P=1.2e-05]	6	+	3	ENSMUSG00000006676	Usp19	3'UTR|intron	protein_coding	KNOWN	NA	NA	no
chr4	137336062	137336122	56117[gene=ENSMUSG00000006699][PH=7][PH0=0.30][P=2.5e-04]	7	-	3	ENSMUSG00000006699	Cdc42	5'UTR|CDS	protein_coding	KNOWN	NA	NA	yes
chr4	137320755	137320815	55873[gene=ENSMUSG00000006699][PH=9][PH0=0.30][P=4.1e-07]	9	-	4	ENSMUSG00000006699	Cdc42	3'UTR	protein_coding	KNOWN	NA	NA	yes
chr10	127067231	127067291	94346[gene=ENSMUSG00000006728][PH=6][PH0=0.14][P=2.3e-05]	6	+	3	ENSMUSG00000006728	Cdk4	3'UTR	protein_coding	KNOWN	NA	NA	yes
chr10	127067117	127067177	94330[gene=ENSMUSG00000006728][PH=11][PH0=0.14][P=4.1e-14]	11	+	4	ENSMUSG00000006728	Cdk4	3'UTR	protein_coding	KNOWN	NA	NA	yes
chr10	127067305	127067365	72041[gene=ENSMUSG00000006736][PH=3][PH0=0.03][P=5.8e-03]	3	-	3	ENSMUSG00000006736	Tspan31	3'UTR	protein_coding	KNOWN	NA	NA	no
chr11	100580864	100580924	93277[gene=ENSMUSG00000006784][PH=5][PH0=0.01][P=1.3e-08]	5	+	3	ENSMUSG00000006782	Cnp	3'UTR|intron	protein_coding	KNOWN	NA	NA	no
chr17	13015300	13015360	10308[gene=ENSMUSG00000006818][PH=13][PH0=0.12][P=1.0e-100]	13	+	4	ENSMUSG00000006818	Sod2	3'UTR	protein_coding	KNOWN	NA	NA	yes
chr9	120960216	120960276	101822[gene=ENSMUSG00000006932][PH=6][PH0=0.26][P=2.1e-03]	6	+	4	ENSMUSG00000006932	Ctnnb1	3'UTR	protein_coding	KNOWN	NA	NA	no
chr9	120960090	120960150	101793[gene=ENSMUSG00000006932][PH=10][PH0=0.26][P=3.4e-09]	10	+	4	ENSMUSG00000006932	Ctnnb1	3'UTR	protein_coding	KNOWN	NA	NA	yes
chr9	120960202	120960262	101818[gene=ENSMUSG00000006932][PH=6][PH0=0.26][P=2.1e-03]	6	+	4	ENSMUSG00000006932	Ctnnb1	3'UTR	protein_coding	KNOWN	NA	NA	no
chr9	120495252	120495312	101233[gene=ENSMUSG00000006941][PH=7][PH0=0.05][P=3.0e-10]	7	+	2	ENSMUSG00000006941	Eif1b	3'UTR	protein_coding	KNOWN	NA	NA	yes
chr17	35003137	35003197	26566[gene=ENSMUSG00000007029][PH=5][PH0=0.08][P=1.1e-04]	5	+	2	ENSMUSG00000007029	Vars	intron	protein_coding	KNOWN	NA	NA	no
chr17	34935268	34935328	26503[gene=ENSMUSG00000007034][PH=4][PH0=0.02][P=2.1e-05]	4	+	4	ENSMUSG00000007038	Neu1	3'UTR	protein_coding	KNOWN	NA	NA	no
chr17	35058412	35058472	26901[gene=ENSMUSG00000007041][PH=7][PH0=0.49][P=2.7e-03]	7	+	2	ENSMUSG00000007041	Clic1	CDS	protein_coding	KNOWN	NA	NA	no
chr17	35055241	35055301	26806[gene=ENSMUSG00000096022][PH=8][PH0=0.91][P=8.3e-03]	8	+	3	ENSMUSG00000007041	Clic1	CDS	protein_coding	KNOWN	NA	NA	yes
chr17	35053069	35053129	26741[gene=ENSMUSG00000096022][PH=10][PH0=0.91][P=9.8e-05]	10	+	2	ENSMUSG00000007041	Clic1	CDS	protein_coding	KNOWN	NA	NA	yes
chr17	35058664	35058724	26954[gene=ENSMUSG00000096022][PH=68][PH0=0.91][P=2.9e-14]	68	+	4	ENSMUSG00000007041	Clic1	3'UTR	protein_coding	KNOWN	NA	NA	yes
chr17	35055269	35055329	26809[gene=ENSMUSG00000007041][PH=7][PH0=0.49][P=2.7e-03]	7	+	2	ENSMUSG00000007041	Clic1	CDS	protein_coding	KNOWN	NA	NA	yes
chr5	110287134	110287194	44832[gene=ENSMUSG00000087439][PH=2][PH0=0.00][P=6.2e-03]	2	+	1	ENSMUSG00000007080	Pole	intron	protein_coding	KNOWN	NA	NA	no
chr12	111656160	111656220	58020[gene=ENSMUSG00000007411][PH=5][PH0=0.13][P=3.6e-03]	5	+	3	ENSMUSG00000007411	Mark3	3'UTR	protein_coding	KNOWN	NA	NA	yes
chr5	3641238	3641298	155[gene=ENSMUSG00000007415][PH=11][PH0=0.08][P=7.1e-14]	11	-	4	ENSMUSG00000007415	Gatad1	3'UTR|intron	protein_coding	KNOWN	NA	NA	yes
chr5	3640850	3640910	130[gene=ENSMUSG00000007415][PH=7][PH0=0.08][P=1.3e-08]	7	-	4	ENSMUSG00000007415	Gatad1	3'UTR|intron	protein_coding	KNOWN	NA	NA	yes
chr6	122317548	122317608	60250[gene=ENSMUSG00000007458][PH=9][PH0=0.37][P=1.1e-06]	9	+	4	ENSMUSG00000007458	M6pr	3'UTR	protein_coding	KNOWN	NA	NA	yes
chr6	122317370	122317430	60227[gene=ENSMUSG00000007458][PH=6][PH0=0.37][P=6.8e-03]	6	+	4	ENSMUSG00000007458	M6pr	3'UTR	protein_coding	KNOWN	NA	NA	yes
chr6	122317387	122317447	60230[gene=ENSMUSG00000007458][PH=7][PH0=0.37][P=4.3e-04]	7	+	4	ENSMUSG00000007458	M6pr	3'UTR	protein_coding	KNOWN	NA	NA	yes
chr6	122317180	122317240	60208[gene=ENSMUSG00000007458][PH=7][PH0=0.37][P=4.3e-04]	7	+	2	ENSMUSG00000007458	M6pr	3'UTR	protein_coding	KNOWN	NA	NA	yes
chr17	20965851	20965911	12957[gene=ENSMUSG00000007564][PH=9][PH0=0.10][P=1.2e-11]	9	+	3	ENSMUSG00000007564	Ppp2r1a	3'UTR	protein_coding	KNOWN	NA	NA	yes
chr4	47411912	47411972	29836[gene=ENSMUSG00000007613][PH=6][PH0=0.19][P=5.7e-04]	6	+	3	ENSMUSG00000007613	Tgfbr1	3'UTR	protein_coding	KNOWN	NA	NA	no
chr13	93357613	93357673	55095[gene=ENSMUSG00000007617][PH=5][PH0=0.11][P=1.5e-03]	5	+	4	ENSMUSG00000007617	Homer1	3'UTR|intron	protein_coding	KNOWN	NA	NA	yes
chr13	93357203	93357263	55074[gene=ENSMUSG00000007617][PH=6][PH0=0.11][P=3.3e-05]	6	+	3	ENSMUSG00000007617	Homer1	3'UTR|intron	protein_coding	KNOWN	NA	NA	yes
chr13	93359777	93359837	55167[gene=ENSMUSG00000007617][PH=5][PH0=0.11][P=1.5e-03]	5	+	3	ENSMUSG00000007617	Homer1	3'UTR|intron	protein_coding	KNOWN	NA	NA	no
chr13	93360066	93360126	55177[gene=ENSMUSG00000007617][PH=6][PH0=0.11][P=3.3e-05]	6	+	3	ENSMUSG00000007617	Homer1	3'UTR|intron	protein_coding	KNOWN	NA	NA	no
chr13	93358891	93358951	55139[gene=ENSMUSG00000007617][PH=10][PH0=0.11][P=1.3e-12]	10	+	4	ENSMUSG00000007617	Homer1	3'UTR|intron	protein_coding	KNOWN	NA	NA	no
chr2	152823864	152823924	96915[gene=ENSMUSG00000007659][PH=12][PH0=0.96][P=8.4e-06]	12	-	3	ENSMUSG00000007659	Bcl2l1	downstream 10K|intron	protein_coding	KNOWN	NA	NA	yes
chr2	152829130	152829190	97229[gene=ENSMUSG00000007659][PH=10][PH0=0.96][P=9.9e-04]	10	-	2	ENSMUSG00000007659	Bcl2l1	3'UTR|intron	protein_coding	KNOWN	NA	NA	no
chr2	152780864	152780924	94744[gene=ENSMUSG00000007659][PH=9][PH0=0.96][P=9.1e-03]	9	-	3	ENSMUSG00000007659	Bcl2l1	3'UTR	protein_coding	KNOWN	NA	NA	no
chr2	152829283	152829343	97252[gene=ENSMUSG00000007659][PH=10][PH0=0.96][P=9.9e-04]	10	-	2	ENSMUSG00000007659	Bcl2l1	3'UTR|intron	protein_coding	KNOWN	NA	NA	no
chr2	152826137	152826197	97039[gene=ENSMUSG00000007659][PH=10][PH0=0.96][P=9.9e-04]	10	-	2	ENSMUSG00000007659	Bcl2l1	downstream 10K|intron	protein_coding	KNOWN	NA	NA	no
chr2	152823308	152823368	96857[gene=ENSMUSG00000007659][PH=9][PH0=0.96][P=9.1e-03]	9	-	4	ENSMUSG00000007659	Bcl2l1	downstream 10K|intron	protein_coding	KNOWN	NA	NA	no
chr2	152780904	152780964	94758[gene=ENSMUSG00000007659][PH=9][PH0=0.96][P=9.1e-03]	9	-	3	ENSMUSG00000007659	Bcl2l1	3'UTR	protein_coding	KNOWN	NA	NA	yes
chr2	152803531	152803591	95631[gene=ENSMUSG00000007659][PH=11][PH0=0.96][P=9.6e-05]	11	-	3	ENSMUSG00000007659	Bcl2l1	intron	protein_coding	KNOWN	NA	NA	no
chr2	152814559	152814619	96290[gene=ENSMUSG00000007659][PH=9][PH0=0.96][P=9.1e-03]	9	-	2	ENSMUSG00000007659	Bcl2l1	intron	protein_coding	KNOWN	NA	NA	yes
chr11	22999094	22999154	21277[gene=ENSMUSG00000007739][PH=7][PH0=0.29][P=1.1e-04]	7	+	4	ENSMUSG00000007739	Cct4	CDS|downstream 10K	protein_coding	KNOWN	NA	NA	yes
chr11	22993394	22993454	21136[gene=ENSMUSG00000007739][PH=6][PH0=0.29][P=2.3e-03]	6	+	4	ENSMUSG00000007739	Cct4	downstream 10K|intron	protein_coding	KNOWN	NA	NA	no
chr5	145245629	145245689	66279[gene=ENSMUSG00000007812][PH=9][PH0=0.47][P=1.1e-05]	9	+	4	ENSMUSG00000007812	Zfp655	3'UTR	protein_coding	KNOWN	NA	NA	no
chr5	145245748	145245808	66299[gene=ENSMUSG00000007812][PH=11][PH0=0.47][P=2.7e-08]	11	+	4	ENSMUSG00000007812	Zfp655	3'UTR	protein_coding	KNOWN	NA	NA	yes
chr9	108337516	108337576	92143[gene=ENSMUSG00000007815][PH=13][PH0=0.14][P=1.0e-100]	13	+	4	ENSMUSG00000007815	Rhoa	3'UTR	protein_coding	KNOWN	NA	NA	yes
chr14	25666204	25666264	9359[gene=ENSMUSG00000007817][PH=4][PH0=0.05][P=7.1e-03]	4	+	2	ENSMUSG00000007817	Zmiz1	3'UTR	protein_coding	KNOWN	NA	NA	no
chr14	25665851	25665911	9343[gene=ENSMUSG00000007817][PH=4][PH0=0.05][P=7.1e-03]	4	+	2	ENSMUSG00000007817	Zmiz1	3'UTR	protein_coding	KNOWN	NA	NA	no
chr14	25664788	25664848	9319[gene=ENSMUSG00000007817][PH=8][PH0=0.05][P=7.0e-11]	8	+	4	ENSMUSG00000007817	Zmiz1	3'UTR	protein_coding	KNOWN	NA	NA	no
chr14	25664821	25664881	9325[gene=ENSMUSG00000007817][PH=4][PH0=0.05][P=7.1e-03]	4	+	4	ENSMUSG00000007817	Zmiz1	3'UTR	protein_coding	KNOWN	NA	NA	no
chr13	58127137	58127197	37166[gene=ENSMUSG00000007836][PH=52][PH0=0.58][P=3.6e-14]	52	-	4	ENSMUSG00000007836	Hnrnpa0	3'UTR	protein_coding	KNOWN	NA	NA	yes
chr13	58126904	58126964	37076[gene=ENSMUSG00000007836][PH=37][PH0=0.58][P=3.6e-14]	37	-	4	ENSMUSG00000007836	Hnrnpa0	3'UTR	protein_coding	KNOWN	NA	NA	yes
chr13	58126715	58126775	37031[gene=ENSMUSG00000007836][PH=12][PH0=0.58][P=6.7e-09]	12	-	3	ENSMUSG00000007836	Hnrnpa0	3'UTR	protein_coding	KNOWN	NA	NA	yes
chr13	58127067	58127127	37137[gene=ENSMUSG00000007836][PH=9][PH0=0.58][P=3.3e-05]	9	-	4	ENSMUSG00000007836	Hnrnpa0	3'UTR	protein_coding	KNOWN	NA	NA	yes
chr11	50380604	50380664	41663[gene=ENSMUSG00000007850][PH=13][PH0=0.67][P=2.6e-09]	13	+	3	ENSMUSG00000007850	Hnrnph1	intron	protein_coding	KNOWN	NA	NA	no
chr11	50380987	50381047	41731[gene=ENSMUSG00000007850][PH=9][PH0=0.67][P=1.5e-04]	9	+	2	ENSMUSG00000007850	Hnrnph1	intron	protein_coding	KNOWN	NA	NA	no
chr11	50380101	50380161	41576[gene=ENSMUSG00000007850][PH=10][PH0=0.67][P=1.2e-05]	10	+	2	ENSMUSG00000007850	Hnrnph1	intron	protein_coding	KNOWN	NA	NA	no
chr11	50382562	50382622	41907[gene=ENSMUSG00000007850][PH=10][PH0=0.67][P=1.2e-05]	10	+	4	ENSMUSG00000007850	Hnrnph1	CDS	protein_coding	KNOWN	NA	NA	no
chr11	50381537	50381597	41792[gene=ENSMUSG00000007850][PH=10][PH0=0.67][P=1.2e-05]	10	+	4	ENSMUSG00000007850	Hnrnph1	CDS|intron	protein_coding	KNOWN	NA	NA	no
chr11	50380377	50380437	41615[gene=ENSMUSG00000007850][PH=8][PH0=0.67][P=1.8e-03]	8	+	2	ENSMUSG00000007850	Hnrnph1	intron	protein_coding	KNOWN	NA	NA	no
chr11	50379447	50379507	41516[gene=ENSMUSG00000007850][PH=10][PH0=0.67][P=1.2e-05]	10	+	3	ENSMUSG00000007850	Hnrnph1	CDS	protein_coding	KNOWN	NA	NA	yes
chrX	10719649	10719709	866[gene=ENSMUSG00000008035][PH=7][PH0=0.05][P=4.2e-10]	7	+	4	ENSMUSG00000008035	Mid1ip1	3'UTR	protein_coding	KNOWN	NA	NA	no
chr1	43123173	43123233	22331[gene=ENSMUSG00000008136][PH=8][PH0=0.11][P=6.4e-09]	8	-	3	ENSMUSG00000008136	Fhl2	3'UTR	protein_coding	KNOWN	NA	NA	yes
chr7	44490330	44490390	13610[gene=ENSMUSG00000008140][PH=3][PH0=0.03][P=4.6e-03]	3	-	2	ENSMUSG00000008140	Emc10	3'UTR	protein_coding	KNOWN	NA	NA	no
chr2	90775651	90775711	76910[gene=ENSMUSG00000008200][PH=6][PH0=0.23][P=1.0e-03]	6	+	3	ENSMUSG00000008200	Fnbp4	intron	protein_coding	KNOWN	NA	NA	no
chr2	90768052	90768112	76703[gene=ENSMUSG00000008200][PH=6][PH0=0.23][P=1.0e-03]	6	+	3	ENSMUSG00000008200	Fnbp4	intron	protein_coding	KNOWN	NA	NA	no
chr2	90775623	90775683	76906[gene=ENSMUSG00000008200][PH=6][PH0=0.23][P=1.0e-03]	6	+	3	ENSMUSG00000008200	Fnbp4	intron	protein_coding	KNOWN	NA	NA	no
chr2	143065260	143065320	104238[gene=ENSMUSG00000008333][PH=4][PH0=0.05][P=4.0e-04]	4	+	4	ENSMUSG00000008333	Snrpb2	CDS	protein_coding	KNOWN	NA	NA	no
chr2	143071586	143071646	104270[gene=ENSMUSG00000008333][PH=5][PH0=0.05][P=4.8e-06]	5	+	4	ENSMUSG00000008333	Snrpb2	3'UTR	protein_coding	KNOWN	NA	NA	yes
chr5	125385965	125386025	52444[gene=ENSMUSG00000008348][PH=15][PH0=0.13][P=1.0e-100]	15	-	3	ENSMUSG00000008348	Ubc	3'UTR	protein_coding	KNOWN	NA	NA	no
chr1	152774527	152774587	59225[gene=ENSMUSG00000008475][PH=5][PH0=0.20][P=5.2e-03]	5	+	2	ENSMUSG00000008475	Arpc5	3'UTR	protein_coding	KNOWN	NA	NA	yes
chr1	152771462	152771522	59174[gene=ENSMUSG00000008475][PH=9][PH0=0.20][P=5.2e-09]	9	+	3	ENSMUSG00000008475	Arpc5	CDS|intron	protein_coding	KNOWN	NA	NA	yes
chr1	152774317	152774377	59210[gene=ENSMUSG00000008475][PH=8][PH0=0.20][P=2.1e-07]	8	+	4	ENSMUSG00000008475	Arpc5	3'UTR	protein_coding	KNOWN	NA	NA	no
chr1	152774776	152774836	59251[gene=ENSMUSG00000008475][PH=5][PH0=0.20][P=5.2e-03]	5	+	3	ENSMUSG00000008475	Arpc5	3'UTR	protein_coding	KNOWN	NA	NA	yes
chr1	152774562	152774622	59232[gene=ENSMUSG00000008475][PH=9][PH0=0.20][P=5.2e-09]	9	+	4	ENSMUSG00000008475	Arpc5	3'UTR	protein_coding	KNOWN	NA	NA	yes
chr17	33953944	33954004	18093[gene=ENSMUSG00000008668][PH=5][PH0=0.17][P=1.6e-03]	5	-	2	ENSMUSG00000008668	Rps18	intron	protein_coding	KNOWN	NA	NA	no
chrX	74270942	74271002	14176[gene=ENSMUSG00000081375][PH=3][PH0=0.04][P=6.8e-03]	3	+	2	ENSMUSG00000008682	Rpl10	5'UTR|downstream 10K|intron	protein_coding	KNOWN	NA	NA	no
chrX	74271521	74271581	14197[gene=ENSMUSG00000001964][PH=6][PH0=0.07][P=4.6e-07]	6	+	2	ENSMUSG00000008682	Rpl10	downstream 10K|intron	protein_coding	KNOWN	NA	NA	no
chrX	74270909	74270969	14172[gene=ENSMUSG00000081375][PH=3][PH0=0.04][P=6.8e-03]	3	+	2	ENSMUSG00000008682	Rpl10	5'UTR|downstream 10K|intron	protein_coding	KNOWN	NA	NA	no
chrX	74272885	74272945	14234[gene=ENSMUSG00000064981][PH=3][PH0=0.03][P=5.2e-03]	3	+	2	ENSMUSG00000008682	Rpl10	CDS|intron	protein_coding	KNOWN	NA	NA	yes
chrX	74272549	74272609	14228[gene=ENSMUSG00000008682][PH=5][PH0=0.12][P=2.5e-04]	5	+	2	ENSMUSG00000008682	Rpl10	intron	protein_coding	KNOWN	NA	NA	yes
chr7	118109064	118109124	46796[gene=ENSMUSG00000008683][PH=8][PH0=0.19][P=1.4e-07]	8	-	4	ENSMUSG00000008683	Rps15a	3'UTR|CDS	protein_coding	KNOWN	NA	NA	yes
chr7	118114522	118114582	46902[gene=ENSMUSG00000008683][PH=5][PH0=0.19][P=4.4e-03]	5	-	2	ENSMUSG00000008683	Rps15a	downstream 10K|intron	protein_coding	KNOWN	NA	NA	no
chr3	103742902	103742962	29372[gene=ENSMUSG00000008730][PH=7][PH0=0.25][P=9.2e-05]	7	-	3	ENSMUSG00000008730	Hipk1	3'UTR	protein_coding	KNOWN	NA	NA	yes
chr3	103742756	103742816	29348[gene=ENSMUSG00000008730][PH=10][PH0=0.25][P=2.8e-09]	10	-	4	ENSMUSG00000008730	Hipk1	3'UTR	protein_coding	KNOWN	NA	NA	yes
chr3	103741155	103741215	29219[gene=ENSMUSG00000008730][PH=6][PH0=0.25][P=2.2e-03]	6	-	3	ENSMUSG00000008730	Hipk1	3'UTR	protein_coding	KNOWN	NA	NA	no
chr3	103741092	103741152	29202[gene=ENSMUSG00000008730][PH=9][PH0=0.25][P=1.0e-07]	9	-	4	ENSMUSG00000008730	Hipk1	3'UTR	protein_coding	KNOWN	NA	NA	no
chr3	103742596	103742656	29324[gene=ENSMUSG00000008730][PH=10][PH0=0.25][P=2.8e-09]	10	-	3	ENSMUSG00000008730	Hipk1	3'UTR	protein_coding	KNOWN	NA	NA	yes
chr3	103742922	103742982	29377[gene=ENSMUSG00000008730][PH=7][PH0=0.25][P=9.2e-05]	7	-	4	ENSMUSG00000008730	Hipk1	3'UTR	protein_coding	KNOWN	NA	NA	yes
chr3	103741116	103741176	29212[gene=ENSMUSG00000008730][PH=7][PH0=0.25][P=9.2e-05]	7	-	4	ENSMUSG00000008730	Hipk1	3'UTR	protein_coding	KNOWN	NA	NA	no
chr3	103740986	103741046	29190[gene=ENSMUSG00000008730][PH=7][PH0=0.25][P=9.2e-05]	7	-	4	ENSMUSG00000008730	Hipk1	3'UTR	protein_coding	KNOWN	NA	NA	no
chr3	103741885	103741945	29270[gene=ENSMUSG00000008730][PH=9][PH0=0.25][P=1.0e-07]	9	-	4	ENSMUSG00000008730	Hipk1	3'UTR	protein_coding	KNOWN	NA	NA	no
chr3	103740324	103740384	29172[gene=ENSMUSG00000008730][PH=6][PH0=0.25][P=2.2e-03]	6	-	2	ENSMUSG00000008730	Hipk1	3'UTR	protein_coding	KNOWN	NA	NA	no
chr3	103741548	103741608	29241[gene=ENSMUSG00000008730][PH=6][PH0=0.25][P=2.2e-03]	6	-	3	ENSMUSG00000008730	Hipk1	3'UTR	protein_coding	KNOWN	NA	NA	yes
chr3	103742970	103743030	29397[gene=ENSMUSG00000008730][PH=29][PH0=0.25][P=1.8e-13]	29	-	4	ENSMUSG00000008730	Hipk1	3'UTR	protein_coding	KNOWN	NA	NA	yes
chr3	100616961	100617021	26820[gene=ENSMUSG00000008763][PH=6][PH0=0.19][P=9.6e-04]	6	-	3	ENSMUSG00000008763	Man1a2	CDS	protein_coding	KNOWN	NA	NA	yes
chr16	84861114	84861174	50613[gene=ENSMUSG00000008976][PH=13][PH0=0.16][P=1.1e-13]	13	+	4	ENSMUSG00000008976	Gabpa	3'UTR|intron	protein_coding	KNOWN	NA	NA	yes
chr15	79362501	79362561	49580[gene=ENSMUSG00000009035][PH=8][PH0=0.04][P=1.2e-12]	8	-	2	ENSMUSG00000009035	Tmem184b	3'UTR	protein_coding	KNOWN	NA	NA	yes
chr11	5079720	5079780	2278[gene=ENSMUSG00000009079][PH=11][PH0=0.40][P=8.3e-09]	11	-	2	ENSMUSG00000009079	Ewsr1	downstream 10K|intron	protein_coding	KNOWN	NA	NA	no
chr11	5082156	5082216	2503[gene=ENSMUSG00000009079][PH=12][PH0=0.40][P=3.1e-10]	12	-	3	ENSMUSG00000009079	Ewsr1	downstream 10K|intron	protein_coding	KNOWN	NA	NA	no
chr11	5096926	5096986	2843[gene=ENSMUSG00000034164][PH=4][PH0=0.02][P=5.1e-05]	4	-	2	ENSMUSG00000009079	Ewsr1	downstream 10K|intron	protein_coding	KNOWN	NA	NA	no
chr11	5097848	5097908	2866[gene=ENSMUSG00000034164][PH=3][PH0=0.02][P=7.0e-03]	3	-	2	ENSMUSG00000009079	Ewsr1	downstream 10K|intron	protein_coding	KNOWN	NA	NA	no
chr11	5080647	5080707	2351[gene=ENSMUSG00000009079][PH=8][PH0=0.40][P=9.0e-05]	8	-	4	ENSMUSG00000009079	Ewsr1	CDS|downstream 10K|intron	protein_coding	KNOWN	NA	NA	no
chr11	5081716	5081776	2448[gene=ENSMUSG00000009079][PH=8][PH0=0.40][P=9.0e-05]	8	-	3	ENSMUSG00000009079	Ewsr1	downstream 10K|intron	protein_coding	KNOWN	NA	NA	no
chr2	74521891	74521951	52848[gene=ENSMUSG00000009207][PH=5][PH0=0.10][P=5.6e-04]	5	-	4	ENSMUSG00000009207	Lnp	3'UTR	protein_coding	KNOWN	NA	NA	no
chr10	77645939	77645999	54261[gene=ENSMUSG00000089424][PH=4][PH0=0.09][P=2.4e-03]	4	+	3	ENSMUSG00000009293	Ube2g2	3'UTR	protein_coding	KNOWN	NA	NA	no
chrX	20935147	20935207	3314[gene=ENSMUSG00000009406][PH=7][PH0=0.06][P=2.6e-09]	7	-	4	ENSMUSG00000009406	Elk1	3'UTR	protein_coding	KNOWN	NA	NA	yes
chr13	98841905	98841965	50757[gene=ENSMUSG00000009470][PH=17][PH0=0.17][P=1.0e-100]	17	-	3	ENSMUSG00000009470	Tnpo1	3'UTR	protein_coding	KNOWN	NA	NA	yes
chr13	98843600	98843660	50890[gene=ENSMUSG00000009470][PH=10][PH0=0.17][P=1.1e-10]	10	-	4	ENSMUSG00000009470	Tnpo1	3'UTR	protein_coding	KNOWN	NA	NA	yes
chr13	98842974	98843034	50835[gene=ENSMUSG00000009470][PH=6][PH0=0.17][P=4.0e-04]	6	-	3	ENSMUSG00000009470	Tnpo1	3'UTR	protein_coding	KNOWN	NA	NA	yes
chr18	68321430	68321490	52088[gene=ENSMUSG00000009535][PH=5][PH0=0.14][P=1.4e-03]	5	+	4	ENSMUSG00000009535	Rnmt	3'UTR	protein_coding	KNOWN	NA	NA	yes
chr2	118475904	118475964	74188[gene=ENSMUSG00000009549][PH=43][PH0=0.30][P=1.0e-100]	43	-	4	ENSMUSG00000009549	Srp14	3'UTR	protein_coding	KNOWN	NA	NA	yes
chr2	32762192	32762252	48204[gene=ENSMUSG00000009563][PH=3][PH0=0.03][P=3.3e-03]	3	+	1	ENSMUSG00000009563	Tor2a	3'UTR	protein_coding	KNOWN	NA	NA	no
chr15	103196174	103196234	65330[gene=ENSMUSG00000009575][PH=12][PH0=0.11][P=1.7e-13]	12	-	2	ENSMUSG00000009575	Cbx5	3'UTR	protein_coding	KNOWN	NA	NA	yes
chr15	103197415	103197475	65366[gene=ENSMUSG00000009575][PH=6][PH0=0.11][P=2.0e-05]	6	-	4	ENSMUSG00000009575	Cbx5	3'UTR	protein_coding	KNOWN	NA	NA	no
chr15	103198443	103198503	65401[gene=ENSMUSG00000009575][PH=7][PH0=0.11][P=3.7e-07]	7	-	2	ENSMUSG00000009575	Cbx5	3'UTR	protein_coding	KNOWN	NA	NA	no
chr15	79907699	79907759	31914[gene=ENSMUSG00000009585][PH=8][PH0=0.08][P=3.7e-10]	8	+	3	ENSMUSG00000009585	Apobec3	3'UTR|intron	protein_coding	KNOWN	NA	NA	yes
chr8	33619581	33619641	8555[gene=ENSMUSG00000009630][PH=19][PH0=0.18][P=8.6e-14]	19	+	4	ENSMUSG00000009630	Ppp2cb	3'UTR	protein_coding	KNOWN	NA	NA	yes
chr8	33619275	33619335	8520[gene=ENSMUSG00000009630][PH=6][PH0=0.18][P=1.8e-04]	6	+	2	ENSMUSG00000009630	Ppp2cb	3'UTR	protein_coding	KNOWN	NA	NA	no
chr8	33619670	33619730	8579[gene=ENSMUSG00000009630][PH=6][PH0=0.18][P=1.8e-04]	6	+	3	ENSMUSG00000009630	Ppp2cb	3'UTR	protein_coding	KNOWN	NA	NA	yes
chr8	33619303	33619363	8524[gene=ENSMUSG00000009630][PH=6][PH0=0.18][P=1.8e-04]	6	+	2	ENSMUSG00000009630	Ppp2cb	3'UTR	protein_coding	KNOWN	NA	NA	no
chr8	33619237	33619297	8513[gene=ENSMUSG00000009630][PH=5][PH0=0.18][P=4.9e-03]	5	+	4	ENSMUSG00000009630	Ppp2cb	3'UTR	protein_coding	KNOWN	NA	NA	no
chr10	59603483	59603543	34988[gene=ENSMUSG00000009647][PH=8][PH0=0.21][P=2.7e-06]	8	-	4	ENSMUSG00000009647	Mcu	intron	protein_coding	KNOWN	NA	NA	no
chr10	59448356	59448416	33407[gene=ENSMUSG00000009647][PH=7][PH0=0.21][P=9.0e-05]	7	-	4	ENSMUSG00000009647	Mcu	3'UTR	protein_coding	KNOWN	NA	NA	yes
chr10	75079567	75079627	51094[gene=ENSMUSG00000009681][PH=5][PH0=0.09][P=6.3e-04]	5	+	1	ENSMUSG00000009681	Bcr	intron	protein_coding	KNOWN	NA	NA	no
chr7	31036423	31036483	10175[gene=ENSMUSG00000009687][PH=9][PH0=0.38][P=1.4e-06]	9	-	3	ENSMUSG00000009687	Fxyd5	CDS|downstream 10K	protein_coding	KNOWN	NA	NA	no
chr7	31032828	31032888	10022[gene=ENSMUSG00000009687][PH=8][PH0=0.38][P=2.9e-05]	8	-	4	ENSMUSG00000009687	Fxyd5	3'UTR|CDS	protein_coding	KNOWN	NA	NA	no
chr7	31040179	31040239	10276[gene=ENSMUSG00000009687][PH=15][PH0=0.38][P=1.0e-100]	15	-	3	ENSMUSG00000009687	Fxyd5	CDS|downstream 10K	protein_coding	KNOWN	NA	NA	yes
chr7	31035234	31035294	10140[gene=ENSMUSG00000009687][PH=6][PH0=0.38][P=8.1e-03]	6	-	2	ENSMUSG00000009687	Fxyd5	CDS|downstream 10K	protein_coding	KNOWN	NA	NA	yes
chr7	31039052	31039112	10238[gene=ENSMUSG00000009687][PH=6][PH0=0.38][P=8.1e-03]	6	-	2	ENSMUSG00000009687	Fxyd5	CDS|downstream 10K	protein_coding	KNOWN	NA	NA	no
chr9	113976269	113976329	98737[gene=ENSMUSG00000009741][PH=7][PH0=0.24][P=6.4e-05]	7	+	2	ENSMUSG00000009741	Ubp1	3'UTR|intron	protein_coding	KNOWN	NA	NA	no
chr4	140979031	140979091	78153[gene=ENSMUSG00000009863][PH=4][PH0=0.05][P=8.0e-04]	4	+	3	ENSMUSG00000009863	Sdhb	CDS	protein_coding	KNOWN	NA	NA	no
chr9	44409027	44409087	45599[gene=ENSMUSG00000032114][PH=5][PH0=0.09][P=7.2e-05]	5	+	3	ENSMUSG00000009927	Rps25	downstream 10K|intron	protein_coding	KNOWN	NA	NA	no
chr19	8707582	8707642	12942[gene=ENSMUSG00000010095][PH=11][PH0=0.24][P=2.1e-11]	11	-	4	ENSMUSG00000010095	Slc3a2	3'UTR	protein_coding	KNOWN	NA	NA	no
chr19	8707758	8707818	12961[gene=ENSMUSG00000010095][PH=6][PH0=0.24][P=8.0e-04]	6	-	2	ENSMUSG00000010095	Slc3a2	CDS	protein_coding	KNOWN	NA	NA	no
chr19	8708176	8708236	12978[gene=ENSMUSG00000010095][PH=6][PH0=0.24][P=8.0e-04]	6	-	2	ENSMUSG00000010095	Slc3a2	CDS	protein_coding	KNOWN	NA	NA	no
chr19	8709951	8710011	13045[gene=ENSMUSG00000010095][PH=6][PH0=0.24][P=8.0e-04]	6	-	2	ENSMUSG00000010095	Slc3a2	intron	protein_coding	KNOWN	NA	NA	no
chr19	8712721	8712781	13159[gene=ENSMUSG00000010095][PH=6][PH0=0.24][P=8.0e-04]	6	-	3	ENSMUSG00000010095	Slc3a2	CDS	protein_coding	KNOWN	NA	NA	no
chr19	8766093	8766153	4740[gene=ENSMUSG00000010097][PH=7][PH0=0.19][P=6.8e-06]	7	+	3	ENSMUSG00000010097	Nxf1	intron	protein_coding	KNOWN	NA	NA	no
chr9	21074881	21074941	3569[gene=ENSMUSG00000010205][PH=20][PH0=0.24][P=1.0e-100]	20	-	4	ENSMUSG00000010205	Raver1	3'UTR	protein_coding	KNOWN	NA	NA	yes
chr9	21075200	21075260	3597[gene=ENSMUSG00000010205][PH=16][PH0=0.24][P=1.0e-100]	16	-	3	ENSMUSG00000010205	Raver1	3'UTR	protein_coding	KNOWN	NA	NA	yes
chr1	43115892	43115952	9281[gene=ENSMUSG00000010290][PH=6][PH0=0.05][P=8.9e-08]	6	+	4	ENSMUSG00000010290	AI597479	3'UTR	protein_coding	KNOWN	NA	NA	yes
chr1	43114713	43114773	9262[gene=ENSMUSG00000010290][PH=4][PH0=0.05][P=7.0e-04]	4	+	3	ENSMUSG00000010290	AI597479	3'UTR	protein_coding	KNOWN	NA	NA	no
chr11	87448915	87448975	83294[gene=ENSMUSG00000010342][PH=4][PH0=0.01][P=1.1e-05]	4	+	2	ENSMUSG00000010342	Tex14	intron	protein_coding	KNOWN	NA	NA	no
chr11	87448804	87448864	83286[gene=ENSMUSG00000010342][PH=4][PH0=0.01][P=1.1e-05]	4	+	4	ENSMUSG00000010342	Tex14	intron	protein_coding	KNOWN	NA	NA	yes
chr11	87443699	87443759	83280[gene=ENSMUSG00000010342][PH=3][PH0=0.01][P=2.8e-03]	3	+	2	ENSMUSG00000010342	Tex14	intron	protein_coding	KNOWN	NA	NA	no
chr11	87471584	87471644	83319[gene=ENSMUSG00000010342][PH=3][PH0=0.01][P=2.8e-03]	3	+	3	ENSMUSG00000010342	Tex14	intron	protein_coding	KNOWN	NA	NA	yes
chr11	87423043	87423103	83240[gene=ENSMUSG00000010342][PH=3][PH0=0.01][P=2.8e-03]	3	+	3	ENSMUSG00000010342	Tex14	intron	protein_coding	KNOWN	NA	NA	no
chr11	74777071	74777131	65634[gene=ENSMUSG00000010554][PH=5][PH0=0.14][P=3.4e-03]	5	+	3	ENSMUSG00000010554	Mettl16	intron	protein_coding	KNOWN	NA	NA	no
chr12	83682170	83682230	45692[gene=ENSMUSG00000010608][PH=8][PH0=0.53][P=1.0e-03]	8	+	3	ENSMUSG00000010608	Rbm25	3'UTR	protein_coding	KNOWN	NA	NA	no
chr12	83682959	83683019	45733[gene=ENSMUSG00000010608][PH=9][PH0=0.53][P=6.9e-05]	9	+	2	ENSMUSG00000010608	Rbm25	3'UTR	protein_coding	KNOWN	NA	NA	no
chr12	83639524	83639584	44574[gene=ENSMUSG00000010608][PH=10][PH0=0.53][P=4.1e-06]	10	+	4	ENSMUSG00000010608	Rbm25	intron	protein_coding	KNOWN	NA	NA	yes
chr9	37654378	37654438	9406[gene=ENSMUSG00000011114][PH=3][PH0=0.02][P=3.0e-03]	3	-	3	ENSMUSG00000011114	Tbrg1	CDS|downstream 10K	protein_coding	KNOWN	NA	NA	no
chr12	17546242	17546302	10186[gene=ENSMUSG00000011179][PH=66][PH0=0.35][P=1.0e-100]	66	+	4	ENSMUSG00000011179	Odc1	intron	protein_coding	KNOWN	NA	NA	yes
chr12	17545869	17545929	10139[gene=ENSMUSG00000011179][PH=8][PH0=0.35][P=1.2e-05]	8	+	2	ENSMUSG00000011179	Odc1	intron	protein_coding	KNOWN	NA	NA	yes
chr11	46147038	46147098	38480[gene=ENSMUSG00000011256][PH=5][PH0=0.16][P=8.8e-03]	5	+	2	ENSMUSG00000011256	Adam19	3'UTR	protein_coding	KNOWN	NA	NA	no
chr11	46129633	46129693	38287[gene=ENSMUSG00000011256][PH=5][PH0=0.16][P=8.8e-03]	5	+	2	ENSMUSG00000011256	Adam19	intron	protein_coding	KNOWN	NA	NA	no
chr7	29831151	29831211	7368[gene=ENSMUSG00000011427][PH=4][PH0=0.05][P=5.0e-04]	4	+	3	ENSMUSG00000011427	Zfp790	3'UTR	protein_coding	KNOWN	NA	NA	yes
chr5	114669495	114669555	41229[gene=ENSMUSG00000011884][PH=9][PH0=0.04][P=1.0e-100]	9	-	4	ENSMUSG00000011884	Gltp	3'UTR	protein_coding	KNOWN	NA	NA	yes
chr5	114669419	114669479	41219[gene=ENSMUSG00000011884][PH=4][PH0=0.04][P=4.0e-04]	4	-	2	ENSMUSG00000011884	Gltp	3'UTR	protein_coding	KNOWN	NA	NA	no
chr5	114669387	114669447	41214[gene=ENSMUSG00000011884][PH=5][PH0=0.04][P=4.2e-06]	5	-	3	ENSMUSG00000011884	Gltp	3'UTR	protein_coding	KNOWN	NA	NA	no
chr5	114669712	114669772	41242[gene=ENSMUSG00000011884][PH=4][PH0=0.04][P=4.0e-04]	4	-	2	ENSMUSG00000011884	Gltp	3'UTR	protein_coding	KNOWN	NA	NA	no
chr15	98542689	98542749	62148[gene=ENSMUSG00000011960][PH=16][PH0=0.29][P=1.0e-100]	16	-	4	ENSMUSG00000011960	Ccnt1	3'UTR|intron	protein_coding	KNOWN	NA	NA	yes
chr15	98540121	98540181	62026[gene=ENSMUSG00000011960][PH=8][PH0=0.29][P=7.4e-06]	8	-	3	ENSMUSG00000011960	Ccnt1	3'UTR|intron	protein_coding	KNOWN	NA	NA	no
chr15	98540462	98540522	62048[gene=ENSMUSG00000011960][PH=6][PH0=0.29][P=3.7e-03]	6	-	3	ENSMUSG00000011960	Ccnt1	3'UTR|intron	protein_coding	KNOWN	NA	NA	no
chr15	98538684	98538744	61959[gene=ENSMUSG00000011960][PH=7][PH0=0.29][P=1.8e-04]	7	-	4	ENSMUSG00000011960	Ccnt1	3'UTR	protein_coding	KNOWN	NA	NA	yes
chr16	17712472	17712532	8581[gene=ENSMUSG00000012114][PH=5][PH0=0.17][P=8.9e-03]	5	-	3	ENSMUSG00000012114	Med15	intron	protein_coding	KNOWN	NA	NA	no
chr16	17675451	17675511	8250[gene=ENSMUSG00000012114][PH=9][PH0=0.17][P=4.1e-09]	9	-	3	ENSMUSG00000012114	Med15	intron	protein_coding	KNOWN	NA	NA	no
chr13	90099076	90099136	53614[gene=ENSMUSG00000012422][PH=8][PH0=0.09][P=1.8e-09]	8	+	3	ENSMUSG00000012422	Tmem167	intron	protein_coding	KNOWN	NA	NA	no
chr13	90099002	90099062	53604[gene=ENSMUSG00000012422][PH=5][PH0=0.09][P=4.6e-04]	5	+	2	ENSMUSG00000012422	Tmem167	intron	protein_coding	KNOWN	NA	NA	no
chr19	37421123	37421183	32123[gene=ENSMUSG00000012443][PH=5][PH0=0.06][P=6.3e-05]	5	+	4	ENSMUSG00000012443	Kif11	3'UTR	protein_coding	KNOWN	NA	NA	no
chr19	37416505	37416565	32089[gene=ENSMUSG00000012443][PH=12][PH0=0.06][P=3.1e-13]	12	+	4	ENSMUSG00000012443	Kif11	CDS	protein_coding	KNOWN	NA	NA	yes
chr19	37403454	37403514	32043[gene=ENSMUSG00000012443][PH=6][PH0=0.06][P=8.2e-07]	6	+	4	ENSMUSG00000012443	Kif11	CDS	protein_coding	KNOWN	NA	NA	yes
chr6	8256009	8256069	806[gene=ENSMUSG00000012483][PH=5][PH0=0.07][P=1.9e-05]	5	-	2	ENSMUSG00000012483	Rpa3	3'UTR	protein_coding	KNOWN	NA	NA	yes
chr6	8255940	8256000	794[gene=ENSMUSG00000012483][PH=12][PH0=0.07][P=1.0e-100]	12	-	4	ENSMUSG00000012483	Rpa3	3'UTR	protein_coding	KNOWN	NA	NA	yes
chr6	29549675	29549735	3971[gene=ENSMUSG00000012535][PH=5][PH0=0.14][P=4.4e-03]	5	-	2	ENSMUSG00000012535	Tnpo3	downstream 10K|intron	protein_coding	KNOWN	NA	NA	no
chr6	29547147	29547207	3921[gene=ENSMUSG00000012535][PH=5][PH0=0.14][P=4.4e-03]	5	-	2	ENSMUSG00000012535	Tnpo3	downstream 10K|intron	protein_coding	KNOWN	NA	NA	no
chr7	43297190	43297250	13440[gene=ENSMUSG00000012640][PH=4][PH0=0.09][P=5.5e-03]	4	-	3	ENSMUSG00000012640	Zfp715	3'UTR|intron	protein_coding	KNOWN	NA	NA	no
chr10	60370802	60370862	35488[gene=ENSMUSG00000012819][PH=3][PH0=0.01][P=5.5e-03]	3	-	2	ENSMUSG00000012819	Cdh23	intron	protein_coding	KNOWN	NA	NA	no
chr10	60375517	60375577	35550[gene=ENSMUSG00000012819][PH=4][PH0=0.01][P=1.9e-05]	4	-	2	ENSMUSG00000012819	Cdh23	intron	protein_coding	KNOWN	NA	NA	no
chr10	60374057	60374117	35529[gene=ENSMUSG00000012819][PH=3][PH0=0.01][P=5.5e-03]	3	-	2	ENSMUSG00000012819	Cdh23	intron	protein_coding	KNOWN	NA	NA	no
chr10	60358455	60358515	35437[gene=ENSMUSG00000012819][PH=3][PH0=0.01][P=5.5e-03]	3	-	2	ENSMUSG00000012819	Cdh23	intron	protein_coding	KNOWN	NA	NA	yes
chr7	12926433	12926493	1636[gene=ENSMUSG00000012848][PH=6][PH0=0.30][P=1.6e-03]	6	+	3	ENSMUSG00000012848	Rps5	CDS	protein_coding	KNOWN	NA	NA	no
chr7	12926642	12926702	1658[gene=ENSMUSG00000012848][PH=12][PH0=0.30][P=3.7e-12]	12	+	4	ENSMUSG00000012848	Rps5	3'UTR	protein_coding	KNOWN	NA	NA	yes
chr7	12925422	12925482	1579[gene=ENSMUSG00000012848][PH=9][PH0=0.30][P=1.4e-07]	9	+	2	ENSMUSG00000012848	Rps5	CDS	protein_coding	KNOWN	NA	NA	no
chr7	12925744	12925804	1612[gene=ENSMUSG00000012848][PH=8][PH0=0.30][P=3.6e-06]	8	+	2	ENSMUSG00000012848	Rps5	CDS	protein_coding	KNOWN	NA	NA	no
chr7	12925506	12925566	1597[gene=ENSMUSG00000012848][PH=8][PH0=0.30][P=3.6e-06]	8	+	3	ENSMUSG00000012848	Rps5	CDS	protein_coding	KNOWN	NA	NA	no
chr17	56446008	56446068	39996[gene=ENSMUSG00000013236][PH=6][PH0=0.19][P=6.0e-04]	6	-	2	ENSMUSG00000013236	Ptprs	intron	protein_coding	KNOWN	NA	NA	no
chr17	56412957	56413017	39581[gene=ENSMUSG00000013236][PH=7][PH0=0.19][P=1.9e-05]	7	-	3	ENSMUSG00000013236	Ptprs	3'UTR	protein_coding	KNOWN	NA	NA	no
chr17	56445814	56445874	39982[gene=ENSMUSG00000013236][PH=8][PH0=0.19][P=5.2e-07]	8	-	4	ENSMUSG00000013236	Ptprs	intron	protein_coding	KNOWN	NA	NA	no
chr1	131848425	131848485	50050[gene=ENSMUSG00000013275][PH=6][PH0=0.27][P=2.1e-03]	6	+	3	ENSMUSG00000013275	Slc41a1	3'UTR	protein_coding	KNOWN	NA	NA	no
chr1	131846862	131846922	49974[gene=ENSMUSG00000013275][PH=6][PH0=0.27][P=2.1e-03]	6	+	2	ENSMUSG00000013275	Slc41a1	3'UTR	protein_coding	KNOWN	NA	NA	yes
chr1	131848769	131848829	50085[gene=ENSMUSG00000013275][PH=30][PH0=0.27][P=1.0e-100]	30	+	4	ENSMUSG00000013275	Slc41a1	3'UTR	protein_coding	KNOWN	NA	NA	yes
chr1	131846823	131846883	49963[gene=ENSMUSG00000013275][PH=7][PH0=0.27][P=9.5e-05]	7	+	3	ENSMUSG00000013275	Slc41a1	3'UTR	protein_coding	KNOWN	NA	NA	yes
chr1	131846893	131846953	49981[gene=ENSMUSG00000013275][PH=9][PH0=0.27][P=1.3e-07]	9	+	3	ENSMUSG00000013275	Slc41a1	3'UTR	protein_coding	KNOWN	NA	NA	no
chr16	18327418	18327478	9506[gene=ENSMUSG00000013539][PH=4][PH0=0.02][P=5.4e-05]	4	-	2	ENSMUSG00000013539	Tango2	intron	protein_coding	KNOWN	NA	NA	yes
chr19	32672612	32672672	23677[gene=ENSMUSG00000013662][PH=7][PH0=0.25][P=7.8e-05]	7	-	4	ENSMUSG00000013662	Atad1	3'UTR	protein_coding	KNOWN	NA	NA	yes
chr19	32673785	32673845	23758[gene=ENSMUSG00000013662][PH=6][PH0=0.25][P=1.9e-03]	6	-	3	ENSMUSG00000013662	Atad1	3'UTR	protein_coding	KNOWN	NA	NA	no
chr19	32673268	32673328	23724[gene=ENSMUSG00000013662][PH=9][PH0=0.25][P=8.7e-08]	9	-	3	ENSMUSG00000013662	Atad1	3'UTR	protein_coding	KNOWN	NA	NA	no
chr19	32673857	32673917	23776[gene=ENSMUSG00000013662][PH=13][PH0=0.25][P=1.4e-13]	13	-	3	ENSMUSG00000013662	Atad1	3'UTR	protein_coding	KNOWN	NA	NA	yes
chr19	32673811	32673871	23764[gene=ENSMUSG00000013662][PH=6][PH0=0.25][P=1.9e-03]	6	-	3	ENSMUSG00000013662	Atad1	3'UTR	protein_coding	KNOWN	NA	NA	yes
chr14	32191836	32191896	8417[gene=ENSMUSG00000013701][PH=48][PH0=0.29][P=1.0e-100]	48	-	4	ENSMUSG00000013701	Timm23	downstream 10K|intron	protein_coding	KNOWN	NA	NA	yes
chr6	106777919	106777979	50557[gene=ENSMUSG00000013736][PH=5][PH0=0.17][P=2.7e-03]	5	+	2	ENSMUSG00000013736	Trnt1	CDS|downstream 10K	protein_coding	KNOWN	NA	NA	no
chr6	106777545	106777605	50548[gene=ENSMUSG00000013736][PH=5][PH0=0.17][P=2.7e-03]	5	+	3	ENSMUSG00000013736	Trnt1	3'UTR|intron	protein_coding	KNOWN	NA	NA	no
chr15	67102881	67102941	40047[gene=ENSMUSG00000013846][PH=6][PH0=0.20][P=2.5e-04]	6	-	3	ENSMUSG00000013846	St3gal1	3'UTR	protein_coding	KNOWN	NA	NA	yes
chr15	67105486	67105546	40111[gene=ENSMUSG00000013846][PH=8][PH0=0.20][P=2.5e-07]	8	-	4	ENSMUSG00000013846	St3gal1	3'UTR	protein_coding	KNOWN	NA	NA	yes
chr11	62894229	62894289	58861[gene=ENSMUSG00000014177][PH=4][PH0=0.04][P=4.4e-04]	4	+	2	ENSMUSG00000014177	Tvp23b	3'UTR|intron	protein_coding	KNOWN	NA	NA	yes
chr11	100582818	100582878	82415[gene=ENSMUSG00000014195][PH=12][PH0=0.18][P=1.0e-100]	12	-	4	ENSMUSG00000014195	Dnajc7	3'UTR	protein_coding	KNOWN	NA	NA	yes
chr11	100618202	100618262	82796[gene=ENSMUSG00000014198][PH=3][PH0=0.01][P=5.5e-04]	3	-	2	ENSMUSG00000014195	Dnajc7	downstream 10K|intron	protein_coding	KNOWN	NA	NA	no
chr11	100584999	100585059	82458[gene=ENSMUSG00000014195][PH=5][PH0=0.18][P=7.2e-03]	5	-	2	ENSMUSG00000014195	Dnajc7	CDS	protein_coding	KNOWN	NA	NA	no
chr1	160203985	160204045	102710[gene=ENSMUSG00000014226][PH=5][PH0=0.10][P=1.9e-04]	5	-	3	ENSMUSG00000014226	Cacybp	intron	protein_coding	KNOWN	NA	NA	no
chr11	96049673	96049733	72426[gene=ENSMUSG00000014349][PH=20][PH0=0.16][P=7.9e-14]	20	-	4	ENSMUSG00000014349	Ube2z	3'UTR	protein_coding	KNOWN	NA	NA	yes
chr11	96049558	96049618	72408[gene=ENSMUSG00000014349][PH=6][PH0=0.16][P=9.0e-05]	6	-	2	ENSMUSG00000014349	Ube2z	3'UTR	protein_coding	KNOWN	NA	NA	yes
chr17	12316083	12316143	2048[gene=ENSMUSG00000014426][PH=4][PH0=0.04][P=9.6e-04]	4	-	3	ENSMUSG00000014426	Map3k4	intron	protein_coding	KNOWN	NA	NA	no
chr10	128393184	128393244	97097[gene=ENSMUSG00000014498][PH=5][PH0=0.12][P=9.4e-04]	5	+	4	ENSMUSG00000014498	Ankrd52	3'UTR|intron	protein_coding	KNOWN	NA	NA	yes
chr10	128393208	128393268	97105[gene=ENSMUSG00000014498][PH=10][PH0=0.12][P=1.4e-12]	10	+	4	ENSMUSG00000014498	Ankrd52	3'UTR|intron	protein_coding	KNOWN	NA	NA	yes
chr10	128390746	128390806	97028[gene=ENSMUSG00000014498][PH=6][PH0=0.12][P=2.2e-05]	6	+	3	ENSMUSG00000014498	Ankrd52	3'UTR|intron	protein_coding	KNOWN	NA	NA	yes
chr4	151846460	151846520	63263[gene=ENSMUSG00000014592][PH=4][PH0=0.02][P=3.4e-04]	4	-	2	ENSMUSG00000014592	Camta1	intron	protein_coding	KNOWN	NA	NA	no
chr4	151048298	151048358	62597[gene=ENSMUSG00000014592][PH=5][PH0=0.02][P=1.4e-06]	5	-	3	ENSMUSG00000014592	Camta1	3'UTR|intron	protein_coding	KNOWN	NA	NA	no
chr3	107741298	107741358	39472[gene=ENSMUSG00000014599][PH=4][PH0=0.09][P=6.3e-03]	4	-	3	ENSMUSG00000014599	Csf1	3'UTR	protein_coding	KNOWN	NA	NA	no
chr3	107750307	107750367	39520[gene=ENSMUSG00000014599][PH=4][PH0=0.09][P=6.3e-03]	4	-	3	ENSMUSG00000014599	Csf1	CDS	protein_coding	KNOWN	NA	NA	no
chr3	107741079	107741139	39459[gene=ENSMUSG00000014599][PH=6][PH0=0.09][P=2.4e-06]	6	-	4	ENSMUSG00000014599	Csf1	3'UTR	protein_coding	KNOWN	NA	NA	no
chr3	107742851	107742911	39486[gene=ENSMUSG00000014599][PH=4][PH0=0.09][P=6.3e-03]	4	-	3	ENSMUSG00000014599	Csf1	3'UTR	protein_coding	KNOWN	NA	NA	no
chr5	110171457	110171517	44467[gene=ENSMUSG00000014668][PH=8][PH0=0.10][P=2.7e-09]	8	+	3	ENSMUSG00000014668	Chfr	3'UTR	protein_coding	KNOWN	NA	NA	yes
chr5	110171514	110171574	44479[gene=ENSMUSG00000014668][PH=6][PH0=0.10][P=1.1e-05]	6	+	4	ENSMUSG00000014668	Chfr	3'UTR	protein_coding	KNOWN	NA	NA	yes
chr5	110171422	110171482	44459[gene=ENSMUSG00000014668][PH=6][PH0=0.10][P=1.1e-05]	6	+	3	ENSMUSG00000014668	Chfr	3'UTR	protein_coding	KNOWN	NA	NA	yes
chr17	15517013	15517073	10659[gene=ENSMUSG00000014767][PH=10][PH0=0.04][P=1.0e-100]	10	+	4	ENSMUSG00000014767	Tbp	3'UTR	protein_coding	KNOWN	NA	NA	yes
chr17	15523002	15523062	3053[gene=ENSMUSG00000014771][PH=4][PH0=0.07][P=1.4e-03]	4	-	3	ENSMUSG00000014771	Pdcd2	intron	protein_coding	KNOWN	NA	NA	no
chr8	105329160	105329220	27176[gene=ENSMUSG00000014778][PH=4][PH0=0.04][P=1.8e-04]	4	-	2	ENSMUSG00000014778	Fhod1	3'UTR	protein_coding	KNOWN	NA	NA	no
chr8	105305222	105305282	43388[gene=ENSMUSG00000014859][PH=6][PH0=0.23][P=4.5e-04]	6	+	4	ENSMUSG00000014859	E2f4	3'UTR	protein_coding	KNOWN	NA	NA	no
chr8	105303616	105303676	43348[gene=ENSMUSG00000014859][PH=5][PH0=0.23][P=9.5e-03]	5	+	3	ENSMUSG00000014859	E2f4	intron	protein_coding	KNOWN	NA	NA	no
chr8	105305316	105305376	43409[gene=ENSMUSG00000014859][PH=16][PH0=0.23][P=1.0e-100]	16	+	3	ENSMUSG00000014859	E2f4	3'UTR	protein_coding	KNOWN	NA	NA	no
chr2	26920059	26920119	39284[gene=ENSMUSG00000014873][PH=11][PH0=0.12][P=7.8e-14]	11	+	4	ENSMUSG00000014873	Surf2	3'UTR	protein_coding	KNOWN	NA	NA	yes
chr8	66890256	66890316	21468[gene=ENSMUSG00000014907][PH=14][PH0=0.21][P=1.0e-100]	14	+	4	ENSMUSG00000014907	Naf1	3'UTR	protein_coding	KNOWN	NA	NA	yes
chr8	66890091	66890151	21446[gene=ENSMUSG00000014907][PH=16][PH0=0.21][P=1.0e-100]	16	+	4	ENSMUSG00000014907	Naf1	3'UTR	protein_coding	KNOWN	NA	NA	yes
chr5	32491981	32492041	14240[gene=ENSMUSG00000014956][PH=8][PH0=0.25][P=4.3e-06]	8	+	4	ENSMUSG00000014956	Ppp1cb	3'UTR|intron	protein_coding	KNOWN	NA	NA	no
chr5	32491794	32491854	14199[gene=ENSMUSG00000014956][PH=21][PH0=0.25][P=1.0e-100]	21	+	4	ENSMUSG00000014956	Ppp1cb	3'UTR|intron	protein_coding	KNOWN	NA	NA	yes
chr5	32492053	32492113	14258[gene=ENSMUSG00000014956][PH=28][PH0=0.25][P=1.0e-100]	28	+	4	ENSMUSG00000014956	Ppp1cb	3'UTR|intron	protein_coding	KNOWN	NA	NA	yes
chr5	32491485	32491545	14151[gene=ENSMUSG00000014956][PH=9][PH0=0.25][P=1.4e-07]	9	+	4	ENSMUSG00000014956	Ppp1cb	3'UTR|intron	protein_coding	KNOWN	NA	NA	yes
chr5	32492311	32492371	14316[gene=ENSMUSG00000014956][PH=19][PH0=0.25][P=1.0e-100]	19	+	4	ENSMUSG00000014956	Ppp1cb	3'UTR|intron	protein_coding	KNOWN	NA	NA	yes
chr5	32491310	32491370	14117[gene=ENSMUSG00000014956][PH=13][PH0=0.25][P=1.0e-100]	13	+	4	ENSMUSG00000014956	Ppp1cb	3'UTR|intron	protein_coding	KNOWN	NA	NA	no
chr5	32483358	32483418	13977[gene=ENSMUSG00000014956][PH=8][PH0=0.25][P=4.3e-06]	8	+	4	ENSMUSG00000014956	Ppp1cb	CDS	protein_coding	KNOWN	NA	NA	yes
chr5	32483427	32483487	13988[gene=ENSMUSG00000014956][PH=6][PH0=0.25][P=2.8e-03]	6	+	2	ENSMUSG00000014956	Ppp1cb	CDS	protein_coding	KNOWN	NA	NA	no
chr5	32491088	32491148	14076[gene=ENSMUSG00000014956][PH=6][PH0=0.25][P=2.8e-03]	6	+	4	ENSMUSG00000014956	Ppp1cb	3'UTR	protein_coding	KNOWN	NA	NA	no
chr5	32491239	32491299	14099[gene=ENSMUSG00000014956][PH=6][PH0=0.25][P=2.8e-03]	6	+	3	ENSMUSG00000014956	Ppp1cb	3'UTR|intron	protein_coding	KNOWN	NA	NA	yes
chr5	32463947	32464007	13755[gene=ENSMUSG00000014956][PH=8][PH0=0.25][P=4.3e-06]	8	+	3	ENSMUSG00000014956	Ppp1cb	intron	protein_coding	KNOWN	NA	NA	no
chr5	32491196	32491256	14090[gene=ENSMUSG00000014956][PH=9][PH0=0.25][P=1.4e-07]	9	+	3	ENSMUSG00000014956	Ppp1cb	3'UTR|intron	protein_coding	KNOWN	NA	NA	yes
chr5	32492147	32492207	14293[gene=ENSMUSG00000014956][PH=7][PH0=0.25][P=1.2e-04]	7	+	3	ENSMUSG00000014956	Ppp1cb	3'UTR|intron	protein_coding	KNOWN	NA	NA	no
chr2	70680933	70680993	68699[gene=ENSMUSG00000014959][PH=5][PH0=0.12][P=1.3e-03]	5	+	2	ENSMUSG00000014959	Gorasp2	intron	protein_coding	KNOWN	NA	NA	no
chr15	65872891	65872951	28283[gene=ENSMUSG00000015002][PH=4][PH0=0.06][P=3.6e-03]	4	+	2	ENSMUSG00000015002	Efr3a	3'UTR	protein_coding	KNOWN	NA	NA	no
chr15	65872949	65873009	28290[gene=ENSMUSG00000015002][PH=4][PH0=0.06][P=3.6e-03]	4	+	2	ENSMUSG00000015002	Efr3a	3'UTR	protein_coding	KNOWN	NA	NA	no
chr17	25267054	25267114	7051[gene=ENSMUSG00000015120][PH=6][PH0=0.15][P=4.0e-05]	6	-	2	ENSMUSG00000015120	Ube2i	3'UTR|intron	protein_coding	KNOWN	NA	NA	no
chr7	66293339	66293399	18366[gene=ENSMUSG00000015133][PH=7][PH0=0.00][P=1.0e-100]	7	-	2	ENSMUSG00000015133	Lrrk1	intron	protein_coding	KNOWN	NA	NA	no
chr7	28788337	28788397	6577[gene=ENSMUSG00000015149][PH=7][PH0=0.14][P=1.2e-06]	7	+	3	ENSMUSG00000015149	Sirt2	3'UTR	protein_coding	KNOWN	NA	NA	yes
chr7	28822185	28822245	7079[gene=ENSMUSG00000015165][PH=21][PH0=0.46][P=1.0e-100]	21	+	3	ENSMUSG00000015165	Hnrnpl	3'UTR	protein_coding	KNOWN	NA	NA	no
chr7	28816888	28816948	6853[gene=ENSMUSG00000015165][PH=7][PH0=0.46][P=2.2e-03]	7	+	2	ENSMUSG00000015165	Hnrnpl	intron	protein_coding	KNOWN	NA	NA	no
chr7	28815286	28815346	6768[gene=ENSMUSG00000015165][PH=8][PH0=0.46][P=1.4e-04]	8	+	3	ENSMUSG00000015165	Hnrnpl	CDS	protein_coding	KNOWN	NA	NA	yes
chr7	28822045	28822105	7029[gene=ENSMUSG00000015165][PH=46][PH0=0.46][P=1.0e-100]	46	+	4	ENSMUSG00000015165	Hnrnpl	3'UTR	protein_coding	KNOWN	NA	NA	no
chr19	46084341	46084401	36695[gene=ENSMUSG00000015176][PH=5][PH0=0.21][P=5.9e-03]	5	+	3	ENSMUSG00000015176	Nolc1	3'UTR	protein_coding	KNOWN	NA	NA	no
chr19	46084185	46084245	36680[gene=ENSMUSG00000015176][PH=5][PH0=0.21][P=5.9e-03]	5	+	3	ENSMUSG00000015176	Nolc1	3'UTR	protein_coding	KNOWN	NA	NA	no
chr4	53021979	53022039	34532[gene=ENSMUSG00000015247][PH=18][PH0=0.10][P=1.0e-100]	18	+	4	ENSMUSG00000015247	Nipsnap3b	3'UTR	protein_coding	KNOWN	NA	NA	yes
chr4	53021853	53021913	34514[gene=ENSMUSG00000015247][PH=4][PH0=0.10][P=8.4e-03]	4	+	2	ENSMUSG00000015247	Nipsnap3b	3'UTR	protein_coding	KNOWN	NA	NA	no
chr10	80931705	80931765	57139[gene=ENSMUSG00000015312][PH=5][PH0=0.20][P=3.5e-03]	5	+	2	ENSMUSG00000015312	Gadd45b	3'UTR	protein_coding	KNOWN	NA	NA	yes
chr10	80932148	80932208	57171[gene=ENSMUSG00000015312][PH=10][PH0=0.20][P=8.3e-11]	10	+	4	ENSMUSG00000015312	Gadd45b	3'UTR	protein_coding	KNOWN	NA	NA	yes
chr1	171943778	171943838	77898[gene=ENSMUSG00000015314][PH=6][PH0=0.14][P=5.9e-05]	6	+	3	ENSMUSG00000015314	Slamf6	3'UTR	protein_coding	KNOWN	NA	NA	yes
chr1	171774956	171775016	74936[gene=ENSMUSG00000015316][PH=11][PH0=1.29][P=1.3e-03]	11	+	3	ENSMUSG00000015316	Slamf1	CDS	protein_coding	KNOWN	NA	NA	no
chr1	171792316	171792376	76129[gene=ENSMUSG00000015316][PH=19][PH0=1.29][P=5.7e-12]	19	+	4	ENSMUSG00000015316	Slamf1	CDS	protein_coding	KNOWN	NA	NA	yes
chr1	171801130	171801190	76952[gene=ENSMUSG00000015316][PH=14][PH0=1.29][P=1.7e-06]	14	+	4	ENSMUSG00000015316	Slamf1	3'UTR	protein_coding	KNOWN	NA	NA	yes
chr1	171799620	171799680	76722[gene=ENSMUSG00000015316][PH=10][PH0=1.29][P=9.7e-03]	10	+	3	ENSMUSG00000015316	Slamf1	3'UTR	protein_coding	KNOWN	NA	NA	no
chr1	171800545	171800605	76861[gene=ENSMUSG00000015316][PH=23][PH0=1.29][P=1.0e-100]	23	+	4	ENSMUSG00000015316	Slamf1	3'UTR	protein_coding	KNOWN	NA	NA	yes
chr1	171787982	171788042	75886[gene=ENSMUSG00000015316][PH=13][PH0=1.29][P=1.7e-05]	13	+	4	ENSMUSG00000015316	Slamf1	CDS	protein_coding	KNOWN	NA	NA	no
chr1	171783737	171783797	75595[gene=ENSMUSG00000015316][PH=12][PH0=1.29][P=1.5e-04]	12	+	4	ENSMUSG00000015316	Slamf1	intron	protein_coding	KNOWN	NA	NA	no
chr1	171798302	171798362	76634[gene=ENSMUSG00000015316][PH=11][PH0=1.29][P=1.3e-03]	11	+	3	ENSMUSG00000015316	Slamf1	intron	protein_coding	KNOWN	NA	NA	no
chr1	171800389	171800449	76819[gene=ENSMUSG00000015316][PH=10][PH0=1.29][P=9.7e-03]	10	+	2	ENSMUSG00000015316	Slamf1	3'UTR	protein_coding	KNOWN	NA	NA	no
chr1	171779904	171779964	75286[gene=ENSMUSG00000015316][PH=13][PH0=1.29][P=1.7e-05]	13	+	4	ENSMUSG00000015316	Slamf1	intron	protein_coding	KNOWN	NA	NA	no
chr2	30090939	30090999	21135[gene=ENSMUSG00000015335][PH=4][PH0=0.02][P=1.1e-05]	4	-	3	ENSMUSG00000015335	Zdhhc12	3'UTR	protein_coding	KNOWN	NA	NA	yes
chr14	56260269	56260329	19204[gene=ENSMUSG00000015437][PH=12][PH0=1.23][P=2.6e-05]	12	-	4	ENSMUSG00000015437	Gzmb	CDS	protein_coding	KNOWN	NA	NA	yes
chr14	56260206	56260266	19180[gene=ENSMUSG00000015437][PH=19][PH0=1.23][P=7.2e-13]	19	-	3	ENSMUSG00000015437	Gzmb	CDS	protein_coding	KNOWN	NA	NA	yes
chr14	56259415	56259475	19110[gene=ENSMUSG00000015437][PH=25][PH0=1.23][P=3.8e-14]	25	-	3	ENSMUSG00000015437	Gzmb	CDS	protein_coding	KNOWN	NA	NA	yes
chr14	56258852	56258912	18933[gene=ENSMUSG00000015437][PH=72][PH0=1.23][P=3.8e-14]	72	-	4	ENSMUSG00000015437	Gzmb	3'UTR	protein_coding	KNOWN	NA	NA	yes
chr14	56260580	56260640	19255[gene=ENSMUSG00000015437][PH=24][PH0=1.23][P=3.8e-14]	24	-	4	ENSMUSG00000015437	Gzmb	CDS	protein_coding	KNOWN	NA	NA	yes
chr14	56259010	56259070	19021[gene=ENSMUSG00000015437][PH=12][PH0=1.23][P=2.6e-05]	12	-	3	ENSMUSG00000015437	Gzmb	3'UTR	protein_coding	KNOWN	NA	NA	yes
chr14	56259062	56259122	19037[gene=ENSMUSG00000015437][PH=15][PH0=1.23][P=2.3e-08]	15	-	4	ENSMUSG00000015437	Gzmb	3'UTR	protein_coding	KNOWN	NA	NA	no
chr17	34655021	34655081	26407[gene=ENSMUSG00000033739][PH=13][PH0=0.13][P=3.3e-14]	13	+	4	ENSMUSG00000015461	Atf6b	3'UTR	protein_coding	KNOWN	NA	NA	yes
chr17	34601118	34601178	18772[gene=ENSMUSG00000015478][PH=6][PH0=0.03][P=2.3e-09]	6	-	4	ENSMUSG00000015478	Rnf5	3'UTR	protein_coding	KNOWN	NA	NA	no
chr10	14020866	14020926	5271[gene=ENSMUSG00000015501][PH=8][PH0=0.56][P=4.8e-03]	8	+	2	ENSMUSG00000015501	Hivep2	intron	protein_coding	KNOWN	NA	NA	no
chr10	14150523	14150583	8465[gene=ENSMUSG00000015501][PH=8][PH0=0.56][P=4.8e-03]	8	+	4	ENSMUSG00000015501	Hivep2	3'UTR	protein_coding	KNOWN	NA	NA	yes
chr10	14150138	14150198	8368[gene=ENSMUSG00000015501][PH=15][PH0=0.56][P=5.5e-12]	15	+	4	ENSMUSG00000015501	Hivep2	3'UTR	protein_coding	KNOWN	NA	NA	yes
chr10	14008810	14008870	4730[gene=ENSMUSG00000015501][PH=8][PH0=0.56][P=4.8e-03]	8	+	3	ENSMUSG00000015501	Hivep2	intron	protein_coding	KNOWN	NA	NA	no
chr10	14018662	14018722	5149[gene=ENSMUSG00000015501][PH=10][PH0=0.56][P=2.1e-05]	10	+	2	ENSMUSG00000015501	Hivep2	intron	protein_coding	KNOWN	NA	NA	no
chr10	14150216	14150276	8397[gene=ENSMUSG00000015501][PH=47][PH0=0.56][P=5.5e-13]	47	+	4	ENSMUSG00000015501	Hivep2	3'UTR	protein_coding	KNOWN	NA	NA	yes
chr17	26699315	26699375	17830[gene=ENSMUSG00000015575][PH=7][PH0=0.11][P=2.0e-07]	7	+	4	ENSMUSG00000015575	Atp6v0e	3'UTR	protein_coding	KNOWN	NA	NA	yes
chr17	46548966	46549026	25359[gene=ENSMUSG00000015605][PH=10][PH0=0.07][P=5.5e-14]	10	-	4	ENSMUSG00000015605	Srf	3'UTR	protein_coding	KNOWN	NA	NA	yes
chr2	9857379	9857439	4337[gene=ENSMUSG00000015619][PH=20][PH0=0.44][P=1.0e-100]	20	-	4	ENSMUSG00000015619	Gata3	3'UTR	protein_coding	KNOWN	NA	NA	yes
chr2	9858011	9858071	4470[gene=ENSMUSG00000015619][PH=48][PH0=0.44][P=1.0e-100]	48	-	4	ENSMUSG00000015619	Gata3	3'UTR	protein_coding	KNOWN	NA	NA	yes
chr2	9857294	9857354	4305[gene=ENSMUSG00000015619][PH=24][PH0=0.44][P=1.0e-100]	24	-	4	ENSMUSG00000015619	Gata3	3'UTR	protein_coding	KNOWN	NA	NA	yes
chr2	9857564	9857624	4379[gene=ENSMUSG00000015619][PH=17][PH0=0.44][P=1.0e-100]	17	-	4	ENSMUSG00000015619	Gata3	3'UTR	protein_coding	KNOWN	NA	NA	yes
chr2	9857065	9857125	4247[gene=ENSMUSG00000015619][PH=9][PH0=0.44][P=9.8e-06]	9	-	4	ENSMUSG00000015619	Gata3	3'UTR	protein_coding	KNOWN	NA	NA	yes
chr2	9874003	9874063	4910[gene=ENSMUSG00000079602][PH=6][PH0=0.19][P=1.3e-04]	6	-	3	ENSMUSG00000015619	Gata3	downstream 10K|intron	protein_coding	KNOWN	NA	NA	no
chr2	9877688	9877748	4991[gene=ENSMUSG00000015619][PH=13][PH0=0.44][P=3.1e-11]	13	-	4	ENSMUSG00000015619	Gata3	5'UTR|downstream 10K|intron	protein_coding	KNOWN	NA	NA	yes
chr9	40804771	40804831	44673[gene=ENSMUSG00000015656][PH=667][PH0=2.59][P=1.0e-100]	667	+	4	ENSMUSG00000015656	Hspa8	intron	protein_coding	KNOWN	NA	NA	yes
chr9	40804011	40804071	44573[gene=ENSMUSG00000015656][PH=67][PH0=2.59][P=1.0e-100]	67	+	4	ENSMUSG00000015656	Hspa8	intron	protein_coding	KNOWN	NA	NA	yes
chr9	40803603	40803663	44525[gene=ENSMUSG00000015656][PH=69][PH0=2.59][P=1.0e-100]	69	+	4	ENSMUSG00000015656	Hspa8	intron	protein_coding	KNOWN	NA	NA	yes
chr3	95323518	95323578	23482[gene=ENSMUSG00000015697][PH=4][PH0=0.07][P=4.7e-03]	4	-	3	ENSMUSG00000015697	Setdb1	3'UTR	protein_coding	KNOWN	NA	NA	yes
chr3	95323432	95323492	47845[gene=ENSMUSG00000015714][PH=6][PH0=0.11][P=6.3e-06]	6	+	2	ENSMUSG00000015714	Cers2	3'UTR	protein_coding	KNOWN	NA	NA	yes
chr3	95323469	95323529	47851[gene=ENSMUSG00000015714][PH=5][PH0=0.11][P=2.9e-04]	5	+	3	ENSMUSG00000015714	Cers2	3'UTR	protein_coding	KNOWN	NA	NA	yes
chr3	95323250	95323310	47836[gene=ENSMUSG00000015714][PH=5][PH0=0.11][P=2.9e-04]	5	+	2	ENSMUSG00000015714	Cers2	3'UTR	protein_coding	KNOWN	NA	NA	yes
chr6	17666666	17666726	7315[gene=ENSMUSG00000015733][PH=7][PH0=0.31][P=2.9e-04]	7	+	4	ENSMUSG00000015733	Capza2	3'UTR	protein_coding	KNOWN	NA	NA	yes
chr6	17666207	17666267	7251[gene=ENSMUSG00000015733][PH=13][PH0=0.31][P=6.9e-13]	13	+	4	ENSMUSG00000015733	Capza2	3'UTR	protein_coding	KNOWN	NA	NA	yes
chr6	17666495	17666555	7300[gene=ENSMUSG00000015733][PH=8][PH0=0.31][P=1.3e-05]	8	+	3	ENSMUSG00000015733	Capza2	3'UTR	protein_coding	KNOWN	NA	NA	no
chr6	17666378	17666438	7281[gene=ENSMUSG00000015733][PH=7][PH0=0.31][P=2.9e-04]	7	+	3	ENSMUSG00000015733	Capza2	3'UTR	protein_coding	KNOWN	NA	NA	no
chr3	96048339	96048399	24384[gene=ENSMUSG00000015747][PH=3][PH0=0.02][P=5.2e-03]	3	-	2	ENSMUSG00000015747	Vps45	CDS	protein_coding	KNOWN	NA	NA	yes
chr3	95945596	95945656	48834[gene=ENSMUSG00000015749][PH=16][PH0=0.18][P=8.0e-14]	16	+	4	ENSMUSG00000015749	Anp32e	3'UTR	protein_coding	KNOWN	NA	NA	yes
chr3	95945312	95945372	48791[gene=ENSMUSG00000015749][PH=5][PH0=0.18][P=5.0e-03]	5	+	3	ENSMUSG00000015749	Anp32e	3'UTR	protein_coding	KNOWN	NA	NA	no
chr3	95946644	95946704	48875[gene=ENSMUSG00000015749][PH=6][PH0=0.18][P=1.9e-04]	6	+	2	ENSMUSG00000015749	Anp32e	3'UTR	protein_coding	KNOWN	NA	NA	no
chr3	95945510	95945570	48814[gene=ENSMUSG00000015749][PH=8][PH0=0.18][P=1.5e-07]	8	+	4	ENSMUSG00000015749	Anp32e	3'UTR	protein_coding	KNOWN	NA	NA	no
chr3	95929579	95929639	48682[gene=ENSMUSG00000015749][PH=6][PH0=0.18][P=1.9e-04]	6	+	4	ENSMUSG00000015749	Anp32e	CDS	protein_coding	KNOWN	NA	NA	no
chr3	95947330	95947390	48907[gene=ENSMUSG00000015749][PH=6][PH0=0.18][P=1.9e-04]	6	+	4	ENSMUSG00000015749	Anp32e	3'UTR	protein_coding	KNOWN	NA	NA	no
chr10	7906703	7906763	1039[gene=ENSMUSG00000015755][PH=8][PH0=0.35][P=5.1e-05]	8	-	2	ENSMUSG00000015755	Tab2	3'UTR	protein_coding	KNOWN	NA	NA	no
chr10	7905643	7905703	1001[gene=ENSMUSG00000015755][PH=14][PH0=0.35][P=5.2e-13]	14	-	4	ENSMUSG00000015755	Tab2	3'UTR	protein_coding	KNOWN	NA	NA	yes
chr10	7924725	7924785	1346[gene=ENSMUSG00000015755][PH=7][PH0=0.35][P=1.0e-03]	7	-	2	ENSMUSG00000015755	Tab2	CDS	protein_coding	KNOWN	NA	NA	no
chr14	46785913	46785973	13344[gene=ENSMUSG00000015759][PH=4][PH0=0.09][P=5.5e-03]	4	-	2	ENSMUSG00000015759	Cnih1	intron	protein_coding	KNOWN	NA	NA	no
chr5	45525453	45525513	19102[gene=ENSMUSG00000015804][PH=29][PH0=0.14][P=1.0e-100]	29	+	4	ENSMUSG00000015804	Med28	3'UTR	protein_coding	KNOWN	NA	NA	yes
chr5	45525512	45525572	19126[gene=ENSMUSG00000015804][PH=11][PH0=0.14][P=1.1e-16]	11	+	2	ENSMUSG00000015804	Med28	3'UTR	protein_coding	KNOWN	NA	NA	no
chr2	75675647	75675707	53134[gene=ENSMUSG00000015839][PH=5][PH0=0.05][P=1.6e-05]	5	-	2	ENSMUSG00000015839	Nfe2l2	3'UTR	protein_coding	KNOWN	NA	NA	yes
chr3	95676180	95676240	23651[gene=ENSMUSG00000015850][PH=2][PH0=0.00][P=7.1e-03]	2	-	3	ENSMUSG00000015850	Adamtsl4	3'UTR	protein_coding	KNOWN	NA	NA	no
chr13	56073699	56073759	36186[gene=ENSMUSG00000015937][PH=22][PH0=0.20][P=1.0e-100]	22	-	3	ENSMUSG00000015937	H2afy	3'UTR	protein_coding	KNOWN	NA	NA	yes
chr13	56073890	56073950	36233[gene=ENSMUSG00000015937][PH=11][PH0=0.20][P=8.7e-12]	11	-	3	ENSMUSG00000015937	H2afy	3'UTR	protein_coding	KNOWN	NA	NA	no
chr13	56073624	56073684	36160[gene=ENSMUSG00000015937][PH=17][PH0=0.20][P=1.0e-100]	17	-	4	ENSMUSG00000015937	H2afy	3'UTR	protein_coding	KNOWN	NA	NA	yes
chr13	56073763	56073823	36211[gene=ENSMUSG00000015937][PH=14][PH0=0.20][P=1.0e-100]	14	-	3	ENSMUSG00000015937	H2afy	3'UTR	protein_coding	KNOWN	NA	NA	no
chr13	56084777	56084837	36350[gene=ENSMUSG00000015937][PH=12][PH0=0.20][P=1.1e-16]	12	-	4	ENSMUSG00000015937	H2afy	intron	protein_coding	KNOWN	NA	NA	yes
chr1	177763178	177763238	123674[gene=ENSMUSG00000015961][PH=7][PH0=0.53][P=9.9e-03]	7	-	2	ENSMUSG00000015961	Adss	3'UTR	protein_coding	KNOWN	NA	NA	no
chr1	177769950	177770010	123907[gene=ENSMUSG00000015961][PH=9][PH0=0.53][P=5.1e-05]	9	-	3	ENSMUSG00000015961	Adss	CDS	protein_coding	KNOWN	NA	NA	yes
chr1	177764469	177764529	123784[gene=ENSMUSG00000015961][PH=11][PH0=0.53][P=1.6e-07]	11	-	3	ENSMUSG00000015961	Adss	intron	protein_coding	KNOWN	NA	NA	no
chr1	177782656	177782716	124385[gene=ENSMUSG00000015961][PH=10][PH0=0.53][P=3.0e-06]	10	-	4	ENSMUSG00000015961	Adss	intron	protein_coding	KNOWN	NA	NA	yes
chr1	177773350	177773410	124051[gene=ENSMUSG00000015961][PH=7][PH0=0.53][P=9.9e-03]	7	-	2	ENSMUSG00000015961	Adss	intron	protein_coding	KNOWN	NA	NA	no
chr1	177763591	177763651	123723[gene=ENSMUSG00000015961][PH=17][PH0=0.53][P=2.5e-13]	17	-	4	ENSMUSG00000015961	Adss	3'UTR	protein_coding	KNOWN	NA	NA	yes
chr1	177764135	177764195	123762[gene=ENSMUSG00000015961][PH=7][PH0=0.53][P=9.9e-03]	7	-	3	ENSMUSG00000015961	Adss	3'UTR	protein_coding	KNOWN	NA	NA	no
chr1	177769927	177769987	123900[gene=ENSMUSG00000015961][PH=7][PH0=0.53][P=9.9e-03]	7	-	2	ENSMUSG00000015961	Adss	CDS	protein_coding	KNOWN	NA	NA	no
chr13	112867809	112867869	64075[gene=ENSMUSG00000016018][PH=11][PH0=0.13][P=2.0e-13]	11	-	3	ENSMUSG00000016018	Skiv2l2	3'UTR	protein_coding	KNOWN	NA	NA	yes
chr9	32429623	32429683	5724[gene=ENSMUSG00000016087][PH=6][PH0=0.27][P=8.3e-03]	6	-	2	ENSMUSG00000016087	Fli1	intron	protein_coding	KNOWN	NA	NA	no
chr9	32520692	32520752	6788[gene=ENSMUSG00000016087][PH=6][PH0=0.27][P=8.3e-03]	6	-	2	ENSMUSG00000016087	Fli1	intron	protein_coding	KNOWN	NA	NA	no
chr9	32422867	32422927	5585[gene=ENSMUSG00000016087][PH=6][PH0=0.27][P=8.3e-03]	6	-	3	ENSMUSG00000016087	Fli1	3'UTR	protein_coding	KNOWN	NA	NA	no
chr9	32423558	32423618	5644[gene=ENSMUSG00000016087][PH=11][PH0=0.27][P=4.3e-10]	11	-	4	ENSMUSG00000016087	Fli1	3'UTR	protein_coding	KNOWN	NA	NA	yes
chr9	32423266	32423326	5615[gene=ENSMUSG00000016087][PH=6][PH0=0.27][P=8.3e-03]	6	-	4	ENSMUSG00000016087	Fli1	3'UTR	protein_coding	KNOWN	NA	NA	no
chr9	32423139	32423199	5602[gene=ENSMUSG00000016087][PH=9][PH0=0.27][P=5.1e-07]	9	-	4	ENSMUSG00000016087	Fli1	3'UTR	protein_coding	KNOWN	NA	NA	yes
chr9	32422274	32422334	5538[gene=ENSMUSG00000016087][PH=8][PH0=0.27][P=1.5e-05]	8	-	3	ENSMUSG00000016087	Fli1	3'UTR	protein_coding	KNOWN	NA	NA	no
chr5	151038573	151038633	65231[gene=ENSMUSG00000016128][PH=3][PH0=0.01][P=8.7e-03]	3	-	3	ENSMUSG00000016128	Stard13	3'UTR	protein_coding	KNOWN	NA	NA	no
chr17	37274385	37274445	29033[gene=ENSMUSG00000016206][PH=10][PH0=0.05][P=8.1e-14]	10	+	4	ENSMUSG00000016206	H2-M3	3'UTR	protein_coding	KNOWN	NA	NA	yes
chr2	174427804	174427864	110846[gene=ENSMUSG00000016256][PH=5][PH0=0.08][P=6.8e-05]	5	-	3	ENSMUSG00000016256	Ctsz	3'UTR	protein_coding	KNOWN	NA	NA	no
chr2	174465645	174465705	111048[gene=ENSMUSG00000016257][PH=8][PH0=0.28][P=2.4e-06]	8	-	3	ENSMUSG00000016257	Slmo2	3'UTR	protein_coding	KNOWN	NA	NA	no
chr2	174465307	174465367	111016[gene=ENSMUSG00000016257][PH=33][PH0=0.28][P=1.0e-100]	33	-	4	ENSMUSG00000016257	Slmo2	3'UTR	protein_coding	KNOWN	NA	NA	yes
chr2	174465170	174465230	110975[gene=ENSMUSG00000016257][PH=7][PH0=0.28][P=6.0e-05]	7	-	3	ENSMUSG00000016257	Slmo2	3'UTR	protein_coding	KNOWN	NA	NA	no
chrX	36884095	36884155	7095[gene=ENSMUSG00000016308][PH=5][PH0=0.13][P=5.8e-04]	5	+	3	ENSMUSG00000016308	Ube2a	3'UTR	protein_coding	KNOWN	NA	NA	yes
chr1	195106832	195106892	134689[gene=ENSMUSG00000016481][PH=5][PH0=0.06][P=2.9e-05]	5	-	3	ENSMUSG00000016481	Cr1l	CDS	protein_coding	KNOWN	NA	NA	yes
chr6	147005195	147005255	80767[gene=ENSMUSG00000016487][PH=4][PH0=0.06][P=5.7e-03]	4	+	2	ENSMUSG00000016487	Ppfibp1	intron	protein_coding	KNOWN	NA	NA	no
chr19	29374889	29374949	23656[gene=ENSMUSG00000016496][PH=9][PH0=0.81][P=1.2e-03]	9	+	3	ENSMUSG00000016496	Cd274	intron	protein_coding	KNOWN	NA	NA	no
chr19	29385735	29385795	24192[gene=ENSMUSG00000016496][PH=16][PH0=0.81][P=9.5e-12]	16	+	4	ENSMUSG00000016496	Cd274	3'UTR	protein_coding	KNOWN	NA	NA	yes
chr19	29386930	29386990	24311[gene=ENSMUSG00000016496][PH=14][PH0=0.81][P=2.9e-09]	14	+	3	ENSMUSG00000016496	Cd274	3'UTR	protein_coding	KNOWN	NA	NA	yes
chr19	29387930	29387990	24410[gene=ENSMUSG00000016496][PH=23][PH0=0.81][P=8.7e-14]	23	+	4	ENSMUSG00000016496	Cd274	3'UTR	protein_coding	KNOWN	NA	NA	yes
chr19	29374872	29374932	23652[gene=ENSMUSG00000016496][PH=9][PH0=0.81][P=1.2e-03]	9	+	3	ENSMUSG00000016496	Cd274	intron	protein_coding	KNOWN	NA	NA	no
chr19	29387192	29387252	24343[gene=ENSMUSG00000016496][PH=26][PH0=0.81][P=8.7e-14]	26	+	4	ENSMUSG00000016496	Cd274	3'UTR	protein_coding	KNOWN	NA	NA	yes
chr19	29377738	29377798	23843[gene=ENSMUSG00000016496][PH=9][PH0=0.81][P=1.2e-03]	9	+	2	ENSMUSG00000016496	Cd274	intron	protein_coding	KNOWN	NA	NA	no
chr19	29388007	29388067	24437[gene=ENSMUSG00000016496][PH=10][PH0=0.81][P=1.1e-04]	10	+	4	ENSMUSG00000016496	Cd274	3'UTR	protein_coding	KNOWN	NA	NA	yes
chr19	29471116	29471176	24689[gene=ENSMUSG00000016498][PH=5][PH0=0.08][P=2.9e-04]	5	+	3	ENSMUSG00000016498	Pdcd1lg2	3'UTR	protein_coding	KNOWN	NA	NA	yes
chr19	29470911	29470971	24668[gene=ENSMUSG00000016498][PH=8][PH0=0.08][P=8.6e-10]	8	+	3	ENSMUSG00000016498	Pdcd1lg2	3'UTR	protein_coding	KNOWN	NA	NA	no
chr5	147018172	147018232	60782[gene=ENSMUSG00000016520][PH=8][PH0=0.22][P=1.5e-06]	8	-	3	ENSMUSG00000016520	Lnx2	3'UTR	protein_coding	KNOWN	NA	NA	yes
chr5	147017758	147017818	60733[gene=ENSMUSG00000016520][PH=6][PH0=0.22][P=1.3e-03]	6	-	3	ENSMUSG00000016520	Lnx2	3'UTR	protein_coding	KNOWN	NA	NA	yes
chr1	131054996	131055056	76778[gene=ENSMUSG00000016528][PH=17][PH0=0.72][P=1.5e-13]	17	-	4	ENSMUSG00000016528	Mapkapk2	3'UTR	protein_coding	KNOWN	NA	NA	yes
chr1	131073099	131073159	77283[gene=ENSMUSG00000016528][PH=9][PH0=0.72][P=8.2e-04]	9	-	3	ENSMUSG00000016528	Mapkapk2	intron	protein_coding	KNOWN	NA	NA	no
chr1	131085967	131086027	77924[gene=ENSMUSG00000016528][PH=11][PH0=0.72][P=4.8e-06]	11	-	3	ENSMUSG00000016528	Mapkapk2	intron	protein_coding	KNOWN	NA	NA	yes
chr1	131074070	131074130	77350[gene=ENSMUSG00000016528][PH=8][PH0=0.72][P=8.9e-03]	8	-	2	ENSMUSG00000016528	Mapkapk2	intron	protein_coding	KNOWN	NA	NA	no
chr1	131093837	131093897	78283[gene=ENSMUSG00000016528][PH=8][PH0=0.72][P=8.9e-03]	8	-	3	ENSMUSG00000016528	Mapkapk2	intron	protein_coding	KNOWN	NA	NA	no
chr1	131053692	131053752	76698[gene=ENSMUSG00000016528][PH=8][PH0=0.72][P=8.9e-03]	8	-	2	ENSMUSG00000016528	Mapkapk2	3'UTR	protein_coding	KNOWN	NA	NA	no
chr1	131084271	131084331	77803[gene=ENSMUSG00000016528][PH=8][PH0=0.72][P=8.9e-03]	8	-	2	ENSMUSG00000016528	Mapkapk2	intron	protein_coding	KNOWN	NA	NA	no
chr1	131087670	131087730	78007[gene=ENSMUSG00000016528][PH=9][PH0=0.72][P=8.2e-04]	9	-	3	ENSMUSG00000016528	Mapkapk2	intron	protein_coding	KNOWN	NA	NA	no
chr1	131024822	131024882	49419[gene=ENSMUSG00000016529][PH=766][PH0=12.37][P=1.5e-12]	766	+	4	ENSMUSG00000016529	Il10	3'UTR	protein_coding	KNOWN	NA	NA	yes
chr1	131024486	131024546	49163[gene=ENSMUSG00000016529][PH=1000][PH0=12.37][P=1.5e-12]	1000	+	4	ENSMUSG00000016529	Il10	3'UTR	protein_coding	KNOWN	NA	NA	yes
chr1	131021348	131021408	48681[gene=ENSMUSG00000016529][PH=57][PH0=12.37][P=1.5e-12]	57	+	4	ENSMUSG00000016529	Il10	CDS	protein_coding	KNOWN	NA	NA	yes
chr1	131024215	131024275	48951[gene=ENSMUSG00000016529][PH=82][PH0=12.37][P=1.5e-12]	82	+	4	ENSMUSG00000016529	Il10	CDS	protein_coding	KNOWN	NA	NA	yes
chr11	116022630	116022690	110247[gene=ENSMUSG00000016559][PH=20][PH0=0.21][P=9.1e-14]	20	-	4	ENSMUSG00000016559	H3f3b	3'UTR	protein_coding	KNOWN	NA	NA	yes
chr11	116022826	116022886	110277[gene=ENSMUSG00000016559][PH=8][PH0=0.21][P=2.4e-07]	8	-	4	ENSMUSG00000016559	H3f3b	3'UTR	protein_coding	KNOWN	NA	NA	no
chr11	116022496	116022556	110217[gene=ENSMUSG00000016559][PH=8][PH0=0.21][P=2.4e-07]	8	-	2	ENSMUSG00000016559	H3f3b	3'UTR	protein_coding	KNOWN	NA	NA	yes
chr14	52294871	52294931	24292[gene=ENSMUSG00000016831][PH=6][PH0=0.11][P=8.7e-06]	6	+	3	ENSMUSG00000016831	Tox4	3'UTR	protein_coding	KNOWN	NA	NA	yes
chr5	100802893	100802953	38004[gene=ENSMUSG00000016833][PH=3][PH0=0.04][P=9.7e-03]	3	+	2	ENSMUSG00000016833	Mrps18c	intron	protein_coding	KNOWN	NA	NA	no
chr2	162933464	162933524	121950[gene=ENSMUSG00000016921][PH=8][PH0=0.43][P=5.9e-05]	8	+	3	ENSMUSG00000016921	Srsf6	CDS	protein_coding	KNOWN	NA	NA	no
chr2	162935074	162935134	122058[gene=ENSMUSG00000016921][PH=11][PH0=0.43][P=6.7e-09]	11	+	4	ENSMUSG00000016921	Srsf6	3'UTR	protein_coding	KNOWN	NA	NA	yes
chr2	162935014	162935074	122044[gene=ENSMUSG00000016921][PH=7][PH0=0.43][P=9.4e-04]	7	+	3	ENSMUSG00000016921	Srsf6	3'UTR	protein_coding	KNOWN	NA	NA	no
chr2	162935153	162935213	122075[gene=ENSMUSG00000016921][PH=7][PH0=0.43][P=9.4e-04]	7	+	2	ENSMUSG00000016921	Srsf6	3'UTR	protein_coding	KNOWN	NA	NA	no
chr17	24047751	24047811	5215[gene=ENSMUSG00000016946][PH=4][PH0=0.05][P=8.4e-04]	4	-	3	ENSMUSG00000016946	Kctd5	3'UTR	protein_coding	KNOWN	NA	NA	no
chr11	17940061	17940121	9125[gene=ENSMUSG00000016984][PH=6][PH0=0.04][P=1.8e-08]	6	-	4	ENSMUSG00000016984	Etaa1	3'UTR	protein_coding	KNOWN	NA	NA	yes
chr11	118164196	118164256	112412[gene=ENSMUSG00000017132][PH=10][PH0=0.12][P=4.3e-12]	10	-	3	ENSMUSG00000017132	Cyth1	3'UTR|intron	protein_coding	KNOWN	NA	NA	yes
chr11	102057781	102057841	86232[gene=ENSMUSG00000017314][PH=8][PH0=0.02][P=1.0e-100]	8	-	3	ENSMUSG00000017314	Mpp2	3'UTR	protein_coding	KNOWN	NA	NA	no
chr11	78696699	78696759	52162[gene=ENSMUSG00000017376][PH=5][PH0=0.13][P=4.5e-03]	5	-	3	ENSMUSG00000017376	Nlk	5'UTR	protein_coding	KNOWN	NA	NA	no
chr11	78578942	78579002	51294[gene=ENSMUSG00000082110][PH=3][PH0=0.03][P=4.9e-03]	3	-	2	ENSMUSG00000017376	Nlk	intron	protein_coding	KNOWN	NA	NA	no
chr11	78159391	78159451	50392[gene=ENSMUSG00000017386][PH=11][PH0=0.09][P=4.8e-14]	11	-	3	ENSMUSG00000017386	Traf4	3'UTR	protein_coding	KNOWN	NA	NA	no
chr11	98028596	98028656	91662[gene=ENSMUSG00000086716][PH=4][PH0=0.08][P=2.4e-03]	4	+	1	ENSMUSG00000017404	Rpl19	intron	protein_coding	KNOWN	NA	NA	no
chr2	15076957	15077017	33797[gene=ENSMUSG00000017418][PH=16][PH0=0.49][P=1.0e-100]	16	+	4	ENSMUSG00000017418	Arl5b	3'UTR	protein_coding	KNOWN	NA	NA	yes
chr2	15076377	15076437	33682[gene=ENSMUSG00000017418][PH=80][PH0=0.49][P=1.0e-100]	80	+	4	ENSMUSG00000017418	Arl5b	3'UTR	protein_coding	KNOWN	NA	NA	yes
chr2	15078114	15078174	33874[gene=ENSMUSG00000017418][PH=7][PH0=0.49][P=5.7e-03]	7	+	3	ENSMUSG00000017418	Arl5b	3'UTR	protein_coding	KNOWN	NA	NA	no
chr2	15076697	15076757	33749[gene=ENSMUSG00000017418][PH=17][PH0=0.49][P=1.0e-100]	17	+	3	ENSMUSG00000017418	Arl5b	3'UTR	protein_coding	KNOWN	NA	NA	yes
chr2	15060090	15060150	33361[gene=ENSMUSG00000017418][PH=7][PH0=0.49][P=5.7e-03]	7	+	3	ENSMUSG00000017418	Arl5b	intron	protein_coding	KNOWN	NA	NA	no
chr2	15078131	15078191	33876[gene=ENSMUSG00000017418][PH=7][PH0=0.49][P=5.7e-03]	7	+	3	ENSMUSG00000017418	Arl5b	3'UTR	protein_coding	KNOWN	NA	NA	no
chr11	80383435	80383495	75815[gene=ENSMUSG00000017421][PH=7][PH0=0.55][P=9.8e-03]	7	+	3	ENSMUSG00000017421	Zfp207	CDS	protein_coding	KNOWN	NA	NA	no
chr11	80404851	80404911	76619[gene=ENSMUSG00000017421][PH=8][PH0=0.55][P=7.9e-04]	8	+	2	ENSMUSG00000017421	Zfp207	3'UTR	protein_coding	KNOWN	NA	NA	no
chr11	80472600	80472660	77247[gene=ENSMUSG00000017428][PH=12][PH0=0.25][P=1.7e-12]	12	+	3	ENSMUSG00000017428	Psmd11	3'UTR|intron	protein_coding	KNOWN	NA	NA	no
chr11	118353800	118353860	113469[gene=ENSMUSG00000017466][PH=3][PH0=0.01][P=2.4e-04]	3	-	2	ENSMUSG00000017466	Timp2	intron	protein_coding	KNOWN	NA	NA	no
chr14	16413698	16413758	4953[gene=ENSMUSG00000017485][PH=8][PH0=0.33][P=3.7e-05]	8	+	3	ENSMUSG00000017485	Top2b	CDS|intron	protein_coding	KNOWN	NA	NA	no
chr14	16430560	16430620	5320[gene=ENSMUSG00000017485][PH=7][PH0=0.33][P=7.9e-04]	7	+	3	ENSMUSG00000017485	Top2b	3'UTR	protein_coding	KNOWN	NA	NA	no
chr14	16413627	16413687	4923[gene=ENSMUSG00000017485][PH=30][PH0=0.33][P=1.0e-100]	30	+	4	ENSMUSG00000017485	Top2b	CDS|intron	protein_coding	KNOWN	NA	NA	yes
chr14	16397860	16397920	4665[gene=ENSMUSG00000017485][PH=7][PH0=0.33][P=7.9e-04]	7	+	4	ENSMUSG00000017485	Top2b	CDS	protein_coding	KNOWN	NA	NA	no
chr14	16416638	16416698	5045[gene=ENSMUSG00000017485][PH=11][PH0=0.33][P=1.9e-09]	11	+	4	ENSMUSG00000017485	Top2b	3'UTR|CDS	protein_coding	KNOWN	NA	NA	no
chr14	16398621	16398681	4681[gene=ENSMUSG00000017485][PH=7][PH0=0.33][P=7.9e-04]	7	+	4	ENSMUSG00000017485	Top2b	CDS	protein_coding	KNOWN	NA	NA	no
chr11	99052600	99052660	93195[gene=ENSMUSG00000017493][PH=6][PH0=0.02][P=8.4e-10]	6	+	3	ENSMUSG00000017493	Igfbp4	3'UTR	protein_coding	KNOWN	NA	NA	no
chr11	80033908	80033968	75403[gene=ENSMUSG00000017548][PH=19][PH0=0.25][P=1.0e-100]	19	+	4	ENSMUSG00000017548	Suz12	3'UTR	protein_coding	KNOWN	NA	NA	yes
chr11	80046724	80046784	56626[gene=ENSMUSG00000017561][PH=8][PH0=0.12][P=9.3e-09]	8	-	2	ENSMUSG00000017561	Crlf3	3'UTR	protein_coding	KNOWN	NA	NA	yes
chr11	80046560	80046620	56604[gene=ENSMUSG00000017561][PH=6][PH0=0.12][P=2.6e-05]	6	-	2	ENSMUSG00000017561	Crlf3	3'UTR	protein_coding	KNOWN	NA	NA	yes
chr11	80046511	80046571	56597[gene=ENSMUSG00000017561][PH=7][PH0=0.12][P=5.3e-07]	7	-	3	ENSMUSG00000017561	Crlf3	3'UTR	protein_coding	KNOWN	NA	NA	yes
chr11	76417052	76417112	48919[gene=ENSMUSG00000017631][PH=8][PH0=0.02][P=1.0e-100]	8	-	4	ENSMUSG00000017631	Abr	3'UTR	protein_coding	KNOWN	NA	NA	yes
chr11	76418795	76418855	48934[gene=ENSMUSG00000017631][PH=4][PH0=0.02][P=8.6e-05]	4	-	3	ENSMUSG00000017631	Abr	3'UTR	protein_coding	KNOWN	NA	NA	yes
chr11	79697225	79697285	74667[gene=ENSMUSG00000017639][PH=6][PH0=0.12][P=5.6e-05]	6	+	3	ENSMUSG00000017639	Rab11fip4	3'UTR	protein_coding	KNOWN	NA	NA	no
chr11	79695499	79695559	74621[gene=ENSMUSG00000017639][PH=12][PH0=0.12][P=1.0e-100]	12	+	4	ENSMUSG00000017639	Rab11fip4	3'UTR	protein_coding	KNOWN	NA	NA	yes
chr11	79697369	79697429	74688[gene=ENSMUSG00000017639][PH=12][PH0=0.12][P=1.0e-100]	12	+	4	ENSMUSG00000017639	Rab11fip4	3'UTR	protein_coding	KNOWN	NA	NA	yes
chr11	79695426	79695486	74605[gene=ENSMUSG00000017639][PH=5][PH0=0.12][P=2.4e-03]	5	+	3	ENSMUSG00000017639	Rab11fip4	3'UTR	protein_coding	KNOWN	NA	NA	no
chr11	79695445	79695505	74609[gene=ENSMUSG00000017639][PH=5][PH0=0.12][P=2.4e-03]	5	+	2	ENSMUSG00000017639	Rab11fip4	3'UTR	protein_coding	KNOWN	NA	NA	yes
chr2	165289243	165289303	105095[gene=ENSMUSG00000017670][PH=17][PH0=0.18][P=1.4e-13]	17	-	4	ENSMUSG00000017670	Elmo2	3'UTR	protein_coding	KNOWN	NA	NA	no
chr2	165289298	165289358	105108[gene=ENSMUSG00000017670][PH=5][PH0=0.18][P=7.4e-03]	5	-	3	ENSMUSG00000017670	Elmo2	3'UTR	protein_coding	KNOWN	NA	NA	yes
chr11	79239511	79239571	55780[gene=ENSMUSG00000017677][PH=9][PH0=0.41][P=3.4e-06]	9	-	4	ENSMUSG00000017677	Wsb1	3'UTR	protein_coding	KNOWN	NA	NA	yes
chr11	79240095	79240155	55881[gene=ENSMUSG00000017677][PH=29][PH0=0.41][P=2.2e-13]	29	-	4	ENSMUSG00000017677	Wsb1	3'UTR	protein_coding	KNOWN	NA	NA	yes
chr11	79239853	79239913	55822[gene=ENSMUSG00000017677][PH=11][PH0=0.41][P=6.5e-09]	11	-	4	ENSMUSG00000017677	Wsb1	3'UTR	protein_coding	KNOWN	NA	NA	no
chr11	79239374	79239434	55754[gene=ENSMUSG00000017677][PH=20][PH0=0.41][P=2.2e-13]	20	-	4	ENSMUSG00000017677	Wsb1	3'UTR	protein_coding	KNOWN	NA	NA	yes
chr11	80265946	80266006	75753[gene=ENSMUSG00000017686][PH=7][PH0=0.08][P=3.5e-08]	7	+	3	ENSMUSG00000017686	Rhot1	3'UTR	protein_coding	KNOWN	NA	NA	yes
chr2	163636813	163636873	104211[gene=ENSMUSG00000017707][PH=9][PH0=0.29][P=2.4e-07]	9	-	4	ENSMUSG00000017707	Serinc3	CDS	protein_coding	KNOWN	NA	NA	yes
chr2	163636932	163636992	104223[gene=ENSMUSG00000017707][PH=6][PH0=0.29][P=3.1e-03]	6	-	3	ENSMUSG00000017707	Serinc3	CDS	protein_coding	KNOWN	NA	NA	no
chr2	163626429	163626489	104100[gene=ENSMUSG00000017707][PH=8][PH0=0.29][P=6.4e-06]	8	-	3	ENSMUSG00000017707	Serinc3	CDS	protein_coding	KNOWN	NA	NA	yes
chr2	163625000	163625060	104032[gene=ENSMUSG00000017707][PH=35][PH0=0.29][P=9.0e-14]	35	-	4	ENSMUSG00000017707	Serinc3	3'UTR	protein_coding	KNOWN	NA	NA	yes
chr2	163624834	163624894	103966[gene=ENSMUSG00000017707][PH=21][PH0=0.29][P=9.0e-14]	21	-	4	ENSMUSG00000017707	Serinc3	3'UTR	protein_coding	KNOWN	NA	NA	yes
chr2	163630981	163631041	104151[gene=ENSMUSG00000017707][PH=6][PH0=0.29][P=3.1e-03]	6	-	3	ENSMUSG00000017707	Serinc3	CDS	protein_coding	KNOWN	NA	NA	no
chr11	118010948	118011008	103765[gene=ENSMUSG00000017715][PH=6][PH0=0.32][P=7.5e-03]	6	+	3	ENSMUSG00000017715	Pgs1	intron	protein_coding	KNOWN	NA	NA	no
chr11	118013688	118013748	103844[gene=ENSMUSG00000017715][PH=6][PH0=0.32][P=7.5e-03]	6	+	2	ENSMUSG00000017715	Pgs1	intron	protein_coding	KNOWN	NA	NA	no
chr11	118023864	118023924	104030[gene=ENSMUSG00000017715][PH=15][PH0=0.32][P=1.0e-100]	15	+	4	ENSMUSG00000017715	Pgs1	3'UTR	protein_coding	KNOWN	NA	NA	yes
chr11	118007121	118007181	103652[gene=ENSMUSG00000017715][PH=7][PH0=0.32][P=4.0e-04]	7	+	2	ENSMUSG00000017715	Pgs1	intron	protein_coding	KNOWN	NA	NA	no
chr11	117994401	117994461	103469[gene=ENSMUSG00000017715][PH=7][PH0=0.32][P=4.0e-04]	7	+	3	ENSMUSG00000017715	Pgs1	intron	protein_coding	KNOWN	NA	NA	no
chr2	164501568	164501628	123358[gene=ENSMUSG00000017734][PH=3][PH0=0.03][P=4.3e-03]	3	+	2	ENSMUSG00000017721	Pigt	3'UTR|CDS	protein_coding	KNOWN	NA	NA	no
chr13	73816186	73816246	47786[gene=ENSMUSG00000017756][PH=4][PH0=0.05][P=1.1e-03]	4	+	3	ENSMUSG00000017756	Slc12a7	3'UTR	protein_coding	KNOWN	NA	NA	yes
chr8	105943724	105943784	27586[gene=ENSMUSG00000017765][PH=16][PH0=0.10][P=1.0e-100]	16	-	4	ENSMUSG00000017765	Slc12a4	3'UTR	protein_coding	KNOWN	NA	NA	yes
chr13	86044980	86045040	44993[gene=ENSMUSG00000017778][PH=145][PH0=0.55][P=1.0e-100]	145	-	4	ENSMUSG00000017778	Cox7c	downstream 10K|intron	protein_coding	KNOWN	NA	NA	yes
chr11	75612244	75612304	68173[gene=ENSMUSG00000017781][PH=5][PH0=0.16][P=4.6e-03]	5	+	3	ENSMUSG00000017781	Pitpna	3'UTR|CDS	protein_coding	KNOWN	NA	NA	yes
chr11	75609097	75609157	68149[gene=ENSMUSG00000017781][PH=5][PH0=0.16][P=4.6e-03]	5	+	3	ENSMUSG00000017781	Pitpna	CDS|intron	protein_coding	KNOWN	NA	NA	no
chr11	75620278	75620338	68238[gene=ENSMUSG00000017781][PH=5][PH0=0.16][P=4.6e-03]	5	+	2	ENSMUSG00000017781	Pitpna	3'UTR|CDS	protein_coding	KNOWN	NA	NA	no
chr11	75620297	75620357	68240[gene=ENSMUSG00000017781][PH=5][PH0=0.16][P=4.6e-03]	5	+	2	ENSMUSG00000017781	Pitpna	3'UTR|CDS	protein_coding	KNOWN	NA	NA	no
chr11	101091341	101091401	94844[gene=ENSMUSG00000001755][PH=12][PH0=0.12][P=1.0e-100]	12	+	3	ENSMUSG00000017801	Mlx	3'UTR	protein_coding	KNOWN	NA	NA	yes
chr17	53500397	53500457	37057[gene=ENSMUSG00000017831][PH=9][PH0=0.13][P=3.0e-10]	9	+	4	ENSMUSG00000017831	Rab5a	CDS	protein_coding	KNOWN	NA	NA	yes
chr17	53506738	53506798	37106[gene=ENSMUSG00000017831][PH=7][PH0=0.13][P=9.3e-07]	7	+	2	ENSMUSG00000017831	Rab5a	3'UTR	protein_coding	KNOWN	NA	NA	no
chr2	167334108	167334168	107649[gene=ENSMUSG00000017929][PH=8][PH0=0.31][P=1.8e-05]	8	-	4	ENSMUSG00000017929	B4galt5	intron	protein_coding	KNOWN	NA	NA	no
chr2	167298442	167298502	107147[gene=ENSMUSG00000017929][PH=59][PH0=0.31][P=1.0e-100]	59	-	4	ENSMUSG00000017929	B4galt5	3'UTR	protein_coding	KNOWN	NA	NA	yes
chr2	167300679	167300739	107220[gene=ENSMUSG00000017929][PH=6][PH0=0.31][P=7.9e-03]	6	-	3	ENSMUSG00000017929	B4galt5	3'UTR	protein_coding	KNOWN	NA	NA	yes
chr6	23460891	23460951	1785[gene=ENSMUSG00000017978][PH=2][PH0=0.00][P=1.1e-03]	2	-	2	ENSMUSG00000017978	Cadps2	intron	protein_coding	KNOWN	NA	NA	yes
chr5	118765207	118765267	51743[gene=ENSMUSG00000018076][PH=6][PH0=0.15][P=5.2e-04]	6	+	2	ENSMUSG00000018076	Med13l	3'UTR	protein_coding	KNOWN	NA	NA	yes
chr5	118764778	118764838	51707[gene=ENSMUSG00000018076][PH=8][PH0=0.15][P=3.0e-07]	8	+	3	ENSMUSG00000018076	Med13l	3'UTR	protein_coding	KNOWN	NA	NA	yes
chr5	118764904	118764964	51724[gene=ENSMUSG00000018076][PH=6][PH0=0.15][P=5.2e-04]	6	+	3	ENSMUSG00000018076	Med13l	3'UTR	protein_coding	KNOWN	NA	NA	yes
chr5	118595867	118595927	50403[gene=ENSMUSG00000018076][PH=6][PH0=0.15][P=5.2e-04]	6	+	3	ENSMUSG00000018076	Med13l	intron	protein_coding	KNOWN	NA	NA	no
chr13	23684593	23684653	15580[gene=ENSMUSG00000018102][PH=10][PH0=0.05][P=5.2e-14]	10	+	3	ENSMUSG00000018102	Hist1h2bc	downstream 10K|intron	protein_coding	KNOWN	NA	NA	yes
chr5	139801820	139801880	62977[gene=ENSMUSG00000018143][PH=12][PH0=0.39][P=1.1e-10]	12	+	4	ENSMUSG00000018143	Mafk	3'UTR	protein_coding	KNOWN	NA	NA	yes
chr5	139802306	139802366	63002[gene=ENSMUSG00000018143][PH=10][PH0=0.39][P=8.0e-08]	10	+	3	ENSMUSG00000018143	Mafk	3'UTR	protein_coding	KNOWN	NA	NA	yes
chr5	139802488	139802548	63056[gene=ENSMUSG00000018143][PH=67][PH0=0.39][P=1.0e-100]	67	+	4	ENSMUSG00000018143	Mafk	3'UTR	protein_coding	KNOWN	NA	NA	yes
chr5	139802367	139802427	63018[gene=ENSMUSG00000018143][PH=12][PH0=0.39][P=1.1e-10]	12	+	4	ENSMUSG00000018143	Mafk	3'UTR	protein_coding	KNOWN	NA	NA	yes
chr11	98154614	98154674	75664[gene=ENSMUSG00000018160][PH=12][PH0=0.14][P=1.0e-100]	12	-	4	ENSMUSG00000018160	Med1	3'UTR|intron	protein_coding	KNOWN	NA	NA	yes
chr11	98477002	98477062	76353[gene=ENSMUSG00000018168][PH=8][PH0=0.63][P=5.7e-03]	8	-	2	ENSMUSG00000018168	Ikzf3	CDS	protein_coding	KNOWN	NA	NA	no
chr11	98483815	98483875	77144[gene=ENSMUSG00000018168][PH=19][PH0=0.63][P=1.0e-100]	19	-	3	ENSMUSG00000018168	Ikzf3	intron	protein_coding	KNOWN	NA	NA	no
chr11	98480479	98480539	76747[gene=ENSMUSG00000018168][PH=11][PH0=0.63][P=2.0e-06]	11	-	3	ENSMUSG00000018168	Ikzf3	intron	protein_coding	KNOWN	NA	NA	no
chr11	98466689	98466749	76226[gene=ENSMUSG00000018168][PH=13][PH0=0.63][P=6.1e-09]	13	-	3	ENSMUSG00000018168	Ikzf3	3'UTR	protein_coding	KNOWN	NA	NA	no
chr11	98478531	98478591	76528[gene=ENSMUSG00000018168][PH=8][PH0=0.63][P=5.7e-03]	8	-	2	ENSMUSG00000018168	Ikzf3	intron	protein_coding	KNOWN	NA	NA	no
chr11	98483967	98484027	77178[gene=ENSMUSG00000018168][PH=16][PH0=0.63][P=5.2e-13]	16	-	3	ENSMUSG00000018168	Ikzf3	intron	protein_coding	KNOWN	NA	NA	no
chr11	98478116	98478176	76469[gene=ENSMUSG00000018168][PH=9][PH0=0.63][P=4.5e-04]	9	-	2	ENSMUSG00000018168	Ikzf3	intron	protein_coding	KNOWN	NA	NA	no
chr11	98479388	98479448	76594[gene=ENSMUSG00000018168][PH=11][PH0=0.63][P=2.0e-06]	11	-	2	ENSMUSG00000018168	Ikzf3	intron	protein_coding	KNOWN	NA	NA	no
chr11	98477394	98477454	76397[gene=ENSMUSG00000018168][PH=14][PH0=0.63][P=3.0e-10]	14	-	4	ENSMUSG00000018168	Ikzf3	intron	protein_coding	KNOWN	NA	NA	yes
chr11	98481161	98481221	76840[gene=ENSMUSG00000018168][PH=11][PH0=0.63][P=2.0e-06]	11	-	3	ENSMUSG00000018168	Ikzf3	intron	protein_coding	KNOWN	NA	NA	no
chr11	98481274	98481334	76864[gene=ENSMUSG00000018168][PH=16][PH0=0.63][P=5.2e-13]	16	-	2	ENSMUSG00000018168	Ikzf3	intron	protein_coding	KNOWN	NA	NA	yes
chr11	98481648	98481708	76917[gene=ENSMUSG00000018168][PH=17][PH0=0.63][P=1.0e-100]	17	-	4	ENSMUSG00000018168	Ikzf3	intron	protein_coding	KNOWN	NA	NA	yes
chr11	98478286	98478346	76490[gene=ENSMUSG00000018168][PH=16][PH0=0.63][P=5.2e-13]	16	-	4	ENSMUSG00000018168	Ikzf3	intron	protein_coding	KNOWN	NA	NA	no
chr11	98483408	98483468	77096[gene=ENSMUSG00000018168][PH=11][PH0=0.63][P=2.0e-06]	11	-	4	ENSMUSG00000018168	Ikzf3	intron	protein_coding	KNOWN	NA	NA	no
chr11	98465813	98465873	76173[gene=ENSMUSG00000018168][PH=8][PH0=0.63][P=5.7e-03]	8	-	3	ENSMUSG00000018168	Ikzf3	3'UTR	protein_coding	KNOWN	NA	NA	yes
chr11	98480709	98480769	76776[gene=ENSMUSG00000018168][PH=9][PH0=0.63][P=4.5e-04]	9	-	3	ENSMUSG00000018168	Ikzf3	intron	protein_coding	KNOWN	NA	NA	no
chr11	98484490	98484550	77217[gene=ENSMUSG00000018168][PH=8][PH0=0.63][P=5.7e-03]	8	-	2	ENSMUSG00000018168	Ikzf3	intron	protein_coding	KNOWN	NA	NA	no
chr11	98479479	98479539	76615[gene=ENSMUSG00000018168][PH=18][PH0=0.63][P=1.0e-100]	18	-	3	ENSMUSG00000018168	Ikzf3	intron	protein_coding	KNOWN	NA	NA	no
chr11	98483291	98483351	77070[gene=ENSMUSG00000018168][PH=8][PH0=0.63][P=5.7e-03]	8	-	3	ENSMUSG00000018168	Ikzf3	intron	protein_coding	KNOWN	NA	NA	no
chr11	86585326	86585386	64197[gene=ENSMUSG00000018171][PH=34][PH0=0.45][P=1.0e-100]	34	-	4	ENSMUSG00000018171	Vmp1	CDS	protein_coding	KNOWN	NA	NA	yes
chr11	86585934	86585994	64293[gene=ENSMUSG00000018171][PH=8][PH0=0.45][P=5.5e-04]	8	-	3	ENSMUSG00000018171	Vmp1	intron	protein_coding	KNOWN	NA	NA	no
chr11	86586640	86586700	64443[gene=ENSMUSG00000018171][PH=23][PH0=0.45][P=1.0e-100]	23	-	2	ENSMUSG00000018171	Vmp1	intron	protein_coding	KNOWN	NA	NA	yes
chr11	86585125	86585185	64146[gene=ENSMUSG00000018171][PH=20][PH0=0.45][P=1.0e-100]	20	-	3	ENSMUSG00000018171	Vmp1	3'UTR	protein_coding	KNOWN	NA	NA	no
chr11	86584698	86584758	64056[gene=ENSMUSG00000018171][PH=27][PH0=0.45][P=1.0e-100]	27	-	4	ENSMUSG00000018171	Vmp1	3'UTR	protein_coding	KNOWN	NA	NA	yes
chr11	86586252	86586312	64341[gene=ENSMUSG00000018171][PH=16][PH0=0.45][P=1.0e-100]	16	-	3	ENSMUSG00000018171	Vmp1	intron	protein_coding	KNOWN	NA	NA	no
chr11	86585061	86585121	64121[gene=ENSMUSG00000018171][PH=7][PH0=0.45][P=8.4e-03]	7	-	2	ENSMUSG00000018171	Vmp1	3'UTR	protein_coding	KNOWN	NA	NA	no
chr11	86585239	86585299	64169[gene=ENSMUSG00000018171][PH=7][PH0=0.45][P=8.4e-03]	7	-	2	ENSMUSG00000018171	Vmp1	3'UTR	protein_coding	KNOWN	NA	NA	no
chr11	86586754	86586814	64468[gene=ENSMUSG00000018171][PH=10][PH0=0.45][P=1.5e-06]	10	-	3	ENSMUSG00000018171	Vmp1	intron	protein_coding	KNOWN	NA	NA	no
chr11	86584768	86584828	64083[gene=ENSMUSG00000018171][PH=14][PH0=0.45][P=3.4e-12]	14	-	3	ENSMUSG00000018171	Vmp1	3'UTR	protein_coding	KNOWN	NA	NA	yes
chr11	86586489	86586549	64405[gene=ENSMUSG00000018171][PH=14][PH0=0.45][P=3.4e-12]	14	-	3	ENSMUSG00000018171	Vmp1	CDS|intron	protein_coding	KNOWN	NA	NA	no
chr11	86584224	86584284	63968[gene=ENSMUSG00000018171][PH=11][PH0=0.45][P=7.0e-08]	11	-	2	ENSMUSG00000018171	Vmp1	3'UTR	protein_coding	KNOWN	NA	NA	no
chr11	86584812	86584872	64097[gene=ENSMUSG00000018171][PH=9][PH0=0.45][P=3.1e-05]	9	-	2	ENSMUSG00000018171	Vmp1	3'UTR	protein_coding	KNOWN	NA	NA	yes
chr11	86585979	86586039	64310[gene=ENSMUSG00000018171][PH=17][PH0=0.45][P=1.0e-100]	17	-	2	ENSMUSG00000018171	Vmp1	intron	protein_coding	KNOWN	NA	NA	no
chr11	86631006	86631066	64643[gene=ENSMUSG00000083992][PH=4][PH0=0.08][P=2.1e-03]	4	-	2	ENSMUSG00000018171	Vmp1	intron	protein_coding	KNOWN	NA	NA	no
chr11	86584477	86584537	64011[gene=ENSMUSG00000018171][PH=13][PH0=0.45][P=1.1e-10]	13	-	2	ENSMUSG00000018171	Vmp1	3'UTR	protein_coding	KNOWN	NA	NA	no
chr11	86584091	86584151	63948[gene=ENSMUSG00000018171][PH=639][PH0=0.45][P=1.0e-100]	639	-	4	ENSMUSG00000018171	Vmp1	3'UTR	protein_coding	KNOWN	NA	NA	yes
chr11	86586340	86586400	64375[gene=ENSMUSG00000018171][PH=21][PH0=0.45][P=1.0e-100]	21	-	4	ENSMUSG00000018171	Vmp1	intron	protein_coding	KNOWN	NA	NA	yes
chr1	143779008	143779068	55432[gene=ENSMUSG00000018189][PH=20][PH0=0.19][P=1.0e-100]	20	+	4	ENSMUSG00000018189	Uchl5	intron	protein_coding	KNOWN	NA	NA	yes
chr2	164154514	164154574	123263[gene=ENSMUSG00000018209][PH=6][PH0=0.13][P=6.7e-05]	6	+	3	ENSMUSG00000018209	Stk4	3'UTR	protein_coding	KNOWN	NA	NA	yes
chr2	164152171	164152231	123186[gene=ENSMUSG00000018209][PH=12][PH0=0.13][P=5.4e-13]	12	+	4	ENSMUSG00000018209	Stk4	3'UTR	protein_coding	KNOWN	NA	NA	yes
chr11	53332710	53332770	43912[gene=ENSMUSG00000018239][PH=3][PH0=0.03][P=7.1e-03]	3	+	3	ENSMUSG00000018239	Zcchc10	3'UTR	protein_coding	KNOWN	NA	NA	yes
chr11	70652137	70652197	46014[gene=ENSMUSG00000018293][PH=13][PH0=0.92][P=8.0e-08]	13	-	3	ENSMUSG00000018293	Pfn1	3'UTR|CDS	protein_coding	KNOWN	NA	NA	yes
chr11	70652807	70652867	46055[gene=ENSMUSG00000018293][PH=12][PH0=0.92][P=1.0e-06]	12	-	2	ENSMUSG00000018293	Pfn1	3'UTR|CDS	protein_coding	KNOWN	NA	NA	yes
chr11	70652012	70652072	45975[gene=ENSMUSG00000018293][PH=45][PH0=0.92][P=1.0e-100]	45	-	4	ENSMUSG00000018293	Pfn1	3'UTR	protein_coding	KNOWN	NA	NA	yes
chr11	70654342	70654402	46161[gene=ENSMUSG00000018287][PH=5][PH0=0.16][P=1.3e-03]	5	-	2	ENSMUSG00000018293	Pfn1	CDS|downstream 10K	protein_coding	KNOWN	NA	NA	no
chr11	70654483	70654543	46196[gene=ENSMUSG00000018293][PH=19][PH0=0.92][P=1.0e-100]	19	-	3	ENSMUSG00000018293	Pfn1	5'UTR|downstream 10K	protein_coding	KNOWN	NA	NA	no
chr11	70651835	70651895	45910[gene=ENSMUSG00000018293][PH=73][PH0=0.92][P=1.0e-100]	73	-	4	ENSMUSG00000018293	Pfn1	3'UTR	protein_coding	KNOWN	NA	NA	yes
chr2	164053551	164053611	104317[gene=ENSMUSG00000018322][PH=6][PH0=0.22][P=5.5e-04]	6	-	4	ENSMUSG00000018322	Tomm34	3'UTR	protein_coding	KNOWN	NA	NA	no
chr2	164054099	164054159	104349[gene=ENSMUSG00000018322][PH=28][PH0=0.22][P=1.0e-100]	28	-	4	ENSMUSG00000018322	Tomm34	3'UTR	protein_coding	KNOWN	NA	NA	yes
chr11	79110697	79110757	54197[gene=ENSMUSG00000018334][PH=9][PH0=0.50][P=1.0e-04]	9	-	3	ENSMUSG00000018334	Ksr1	intron	protein_coding	KNOWN	NA	NA	no
chr11	79113602	79113662	54303[gene=ENSMUSG00000018334][PH=9][PH0=0.50][P=1.0e-04]	9	-	4	ENSMUSG00000018334	Ksr1	intron	protein_coding	KNOWN	NA	NA	no
chr11	79013530	79013590	52261[gene=ENSMUSG00000018334][PH=12][PH0=0.50][P=1.3e-08]	12	-	4	ENSMUSG00000018334	Ksr1	3'UTR	protein_coding	KNOWN	NA	NA	yes
chr11	79130193	79130253	54977[gene=ENSMUSG00000018334][PH=9][PH0=0.50][P=1.0e-04]	9	-	3	ENSMUSG00000018334	Ksr1	intron	protein_coding	KNOWN	NA	NA	no
chr11	79139704	79139764	55417[gene=ENSMUSG00000018334][PH=8][PH0=0.50][P=1.6e-03]	8	-	2	ENSMUSG00000018334	Ksr1	intron	protein_coding	KNOWN	NA	NA	no
chr11	79143828	79143888	55596[gene=ENSMUSG00000018334][PH=8][PH0=0.50][P=1.6e-03]	8	-	3	ENSMUSG00000018334	Ksr1	intron	protein_coding	KNOWN	NA	NA	no
chr11	54981617	54981677	35438[gene=ENSMUSG00000018340][PH=6][PH0=0.23][P=1.6e-03]	6	-	2	ENSMUSG00000018340	Anxa6	CDS	protein_coding	KNOWN	NA	NA	no
chr11	55030114	55030174	36075[gene=ENSMUSG00000018340][PH=6][PH0=0.23][P=1.6e-03]	6	-	3	ENSMUSG00000018340	Anxa6	intron	protein_coding	KNOWN	NA	NA	no
chr6	67303741	67303801	27932[gene=ENSMUSG00000018341][PH=5][PH0=0.16][P=9.2e-03]	5	-	3	ENSMUSG00000018341	Il12rb2	CDS	protein_coding	KNOWN	NA	NA	no
chr6	67291458	67291518	27781[gene=ENSMUSG00000018341][PH=6][PH0=0.16][P=3.0e-04]	6	-	3	ENSMUSG00000018341	Il12rb2	3'UTR	protein_coding	KNOWN	NA	NA	no
chr6	67291811	67291871	27832[gene=ENSMUSG00000018341][PH=5][PH0=0.16][P=9.2e-03]	5	-	3	ENSMUSG00000018341	Il12rb2	3'UTR	protein_coding	KNOWN	NA	NA	no
chr6	67291307	67291367	27766[gene=ENSMUSG00000018341][PH=11][PH0=0.16][P=1.1e-12]	11	-	4	ENSMUSG00000018341	Il12rb2	3'UTR	protein_coding	KNOWN	NA	NA	no
chr6	67291524	67291584	27795[gene=ENSMUSG00000018341][PH=10][PH0=0.16][P=6.8e-11]	10	-	3	ENSMUSG00000018341	Il12rb2	3'UTR	protein_coding	KNOWN	NA	NA	no
chr11	88082839	88082899	84509[gene=ENSMUSG00000018377][PH=6][PH0=0.08][P=1.1e-06]	6	+	3	ENSMUSG00000018377	Vezf1	3'UTR	protein_coding	KNOWN	NA	NA	no
chr11	88073628	88073688	84445[gene=ENSMUSG00000087373][PH=4][PH0=0.05][P=5.0e-04]	4	+	2	ENSMUSG00000018377	Vezf1	CDS	protein_coding	KNOWN	NA	NA	no
chr11	88051022	88051082	84188[gene=ENSMUSG00000018379][PH=24][PH0=1.04][P=4.6e-14]	24	+	4	ENSMUSG00000018379	Srsf1	3'UTR	protein_coding	KNOWN	NA	NA	yes
chr11	88050699	88050759	84116[gene=ENSMUSG00000018379][PH=13][PH0=1.04][P=4.8e-07]	13	+	3	ENSMUSG00000018379	Srsf1	3'UTR|intron	protein_coding	KNOWN	NA	NA	no
chr11	88051436	88051496	84300[gene=ENSMUSG00000018379][PH=10][PH0=1.04][P=5.5e-04]	10	+	3	ENSMUSG00000018379	Srsf1	3'UTR	protein_coding	KNOWN	NA	NA	no
chr11	88050286	88050346	83998[gene=ENSMUSG00000018379][PH=14][PH0=1.04][P=3.9e-08]	14	+	4	ENSMUSG00000018379	Srsf1	3'UTR|intron	protein_coding	KNOWN	NA	NA	yes
chr11	88050793	88050853	84140[gene=ENSMUSG00000018379][PH=12][PH0=1.04][P=5.5e-06]	12	+	4	ENSMUSG00000018379	Srsf1	3'UTR|intron	protein_coding	KNOWN	NA	NA	yes
chr11	88050023	88050083	83954[gene=ENSMUSG00000018379][PH=14][PH0=1.04][P=3.9e-08]	14	+	4	ENSMUSG00000018379	Srsf1	3'UTR	protein_coding	KNOWN	NA	NA	no
chr11	88051345	88051405	84277[gene=ENSMUSG00000018379][PH=9][PH0=1.04][P=4.7e-03]	9	+	3	ENSMUSG00000018379	Srsf1	3'UTR	protein_coding	KNOWN	NA	NA	yes
chr11	88049967	88050027	83937[gene=ENSMUSG00000018379][PH=10][PH0=1.04][P=5.5e-04]	10	+	4	ENSMUSG00000018379	Srsf1	3'UTR|CDS	protein_coding	KNOWN	NA	NA	no
chr11	88049767	88049827	83901[gene=ENSMUSG00000018379][PH=11][PH0=1.04][P=5.8e-05]	11	+	4	ENSMUSG00000018379	Srsf1	3'UTR|intron	protein_coding	KNOWN	NA	NA	yes
chr11	88049835	88049895	83916[gene=ENSMUSG00000018379][PH=10][PH0=1.04][P=5.5e-04]	10	+	4	ENSMUSG00000018379	Srsf1	3'UTR|intron	protein_coding	KNOWN	NA	NA	no
chr11	88051228	88051288	84252[gene=ENSMUSG00000018379][PH=19][PH0=1.04][P=9.3e-14]	19	+	4	ENSMUSG00000018379	Srsf1	3'UTR	protein_coding	KNOWN	NA	NA	yes
chr11	88050471	88050531	84045[gene=ENSMUSG00000018379][PH=10][PH0=1.04][P=5.5e-04]	10	+	2	ENSMUSG00000018379	Srsf1	3'UTR|intron	protein_coding	KNOWN	NA	NA	no
chr11	88049674	88049734	83881[gene=ENSMUSG00000018379][PH=13][PH0=1.04][P=4.8e-07]	13	+	3	ENSMUSG00000018379	Srsf1	3'UTR|intron	protein_coding	KNOWN	NA	NA	no
chr11	88050564	88050624	84073[gene=ENSMUSG00000018379][PH=19][PH0=1.04][P=9.3e-14]	19	+	4	ENSMUSG00000018379	Srsf1	3'UTR|intron	protein_coding	KNOWN	NA	NA	yes
chr11	88049949	88050009	83933[gene=ENSMUSG00000018379][PH=9][PH0=1.04][P=4.7e-03]	9	+	3	ENSMUSG00000018379	Srsf1	3'UTR|CDS	protein_coding	KNOWN	NA	NA	no
chr11	88051142	88051202	84226[gene=ENSMUSG00000018379][PH=13][PH0=1.04][P=4.8e-07]	13	+	4	ENSMUSG00000018379	Srsf1	3'UTR	protein_coding	KNOWN	NA	NA	yes
chr11	104414290	104414350	90044[gene=ENSMUSG00000018412][PH=6][PH0=0.19][P=1.3e-03]	6	-	4	ENSMUSG00000018412	Kansl1	intron	protein_coding	KNOWN	NA	NA	no
chr11	104391854	104391914	89688[gene=ENSMUSG00000018412][PH=7][PH0=0.19][P=4.3e-05]	7	-	4	ENSMUSG00000018412	Kansl1	intron	protein_coding	KNOWN	NA	NA	no
chr11	104333761	104333821	89205[gene=ENSMUSG00000018412][PH=6][PH0=0.19][P=1.3e-03]	6	-	4	ENSMUSG00000018412	Kansl1	3'UTR	protein_coding	KNOWN	NA	NA	yes
chr11	104409770	104409830	89949[gene=ENSMUSG00000018412][PH=6][PH0=0.19][P=1.3e-03]	6	-	2	ENSMUSG00000018412	Kansl1	intron	protein_coding	KNOWN	NA	NA	no
chr11	107167099	107167159	95695[gene=ENSMUSG00000081103][PH=4][PH0=0.11][P=6.3e-03]	4	-	3	ENSMUSG00000018433	Nol11	3'UTR	protein_coding	KNOWN	NA	NA	yes
chr11	70980051	70980111	46518[gene=ENSMUSG00000018446][PH=5][PH0=0.24][P=9.5e-03]	5	-	2	ENSMUSG00000018446	C1qbp	CDS|downstream 10K	protein_coding	KNOWN	NA	NA	no
chr11	70978019	70978079	46464[gene=ENSMUSG00000018446][PH=18][PH0=0.24][P=1.0e-100]	18	-	4	ENSMUSG00000018446	C1qbp	3'UTR	protein_coding	KNOWN	NA	NA	yes
chr11	70977853	70977913	46419[gene=ENSMUSG00000018446][PH=17][PH0=0.24][P=1.0e-100]	17	-	4	ENSMUSG00000018446	C1qbp	3'UTR	protein_coding	KNOWN	NA	NA	yes
chr11	70977938	70977998	46440[gene=ENSMUSG00000018446][PH=8][PH0=0.24][P=6.4e-07]	8	-	4	ENSMUSG00000018446	C1qbp	3'UTR	protein_coding	KNOWN	NA	NA	yes
chr11	69350444	69350504	43494[gene=ENSMUSG00000018474][PH=92][PH0=0.20][P=1.0e-100]	92	-	4	ENSMUSG00000018474	Chd3	intron	protein_coding	KNOWN	NA	NA	yes
chr11	69399150	69399210	43758[gene=ENSMUSG00000018476][PH=80][PH0=0.80][P=1.4e-13]	80	-	4	ENSMUSG00000018476	Kdm6b	3'UTR	protein_coding	KNOWN	NA	NA	yes
chr11	69405302	69405362	44107[gene=ENSMUSG00000018476][PH=9][PH0=0.80][P=9.1e-04]	9	-	3	ENSMUSG00000018476	Kdm6b	CDS	protein_coding	KNOWN	NA	NA	yes
chr11	69399615	69399675	43869[gene=ENSMUSG00000018476][PH=60][PH0=0.80][P=1.4e-13]	60	-	4	ENSMUSG00000018476	Kdm6b	3'UTR	protein_coding	KNOWN	NA	NA	yes
chr11	69399273	69399333	43819[gene=ENSMUSG00000018476][PH=15][PH0=0.80][P=1.2e-10]	15	-	2	ENSMUSG00000018476	Kdm6b	3'UTR	protein_coding	KNOWN	NA	NA	yes
chr11	69398503	69398563	43646[gene=ENSMUSG00000018476][PH=45][PH0=0.80][P=1.4e-13]	45	-	4	ENSMUSG00000018476	Kdm6b	3'UTR	protein_coding	KNOWN	NA	NA	yes
chr11	69408690	69408750	44271[gene=ENSMUSG00000018476][PH=8][PH0=0.80][P=8.9e-03]	8	-	2	ENSMUSG00000018476	Kdm6b	5'UTR	protein_coding	KNOWN	NA	NA	no
chr11	69398838	69398898	43688[gene=ENSMUSG00000018476][PH=12][PH0=0.80][P=4.9e-07]	12	-	3	ENSMUSG00000018476	Kdm6b	3'UTR	protein_coding	KNOWN	NA	NA	yes
chr11	85188078	85188138	60714[gene=ENSMUSG00000018481][PH=5][PH0=0.14][P=2.4e-03]	5	-	3	ENSMUSG00000018481	Appbp2	3'UTR	protein_coding	KNOWN	NA	NA	no
chr11	62389726	62389786	40184[gene=ENSMUSG00000018501][PH=9][PH0=0.16][P=6.8e-09]	9	-	4	ENSMUSG00000018501	Ncor1	CDS	protein_coding	KNOWN	NA	NA	yes
chr11	97746929	97746989	75263[gene=ENSMUSG00000018541][PH=5][PH0=0.06][P=2.0e-05]	5	-	3	ENSMUSG00000018541	Cwc25	3'UTR	protein_coding	KNOWN	NA	NA	yes
chr11	55482782	55482842	50334[gene=ENSMUSG00000018583][PH=115][PH0=0.50][P=1.0e-100]	115	+	4	ENSMUSG00000018583	G3bp1	intron	protein_coding	KNOWN	NA	NA	yes
chr11	55500299	55500359	50738[gene=ENSMUSG00000018583][PH=44][PH0=0.50][P=1.0e-100]	44	+	4	ENSMUSG00000018583	G3bp1	3'UTR	protein_coding	KNOWN	NA	NA	yes
chr11	55502478	55502538	50819[gene=ENSMUSG00000098906][PH=4][PH0=0.10][P=3.4e-03]	4	+	3	ENSMUSG00000018583	G3bp1	3'UTR	protein_coding	KNOWN	NA	NA	no
chr11	11717211	11717271	6893[gene=ENSMUSG00000018654][PH=11][PH0=1.25][P=2.1e-03]	11	+	2	ENSMUSG00000018654	Ikzf1	intron	protein_coding	KNOWN	NA	NA	no
chr11	11771975	11772035	10067[gene=ENSMUSG00000018654][PH=37][PH0=1.25][P=1.0e-100]	37	+	4	ENSMUSG00000018654	Ikzf1	3'UTR	protein_coding	KNOWN	NA	NA	yes
chr11	11771530	11771590	9946[gene=ENSMUSG00000018654][PH=14][PH0=1.25][P=2.4e-06]	14	+	2	ENSMUSG00000018654	Ikzf1	3'UTR	protein_coding	KNOWN	NA	NA	yes
chr11	11739115	11739175	8283[gene=ENSMUSG00000018654][PH=11][PH0=1.25][P=2.1e-03]	11	+	3	ENSMUSG00000018654	Ikzf1	intron	protein_coding	KNOWN	NA	NA	no
chr11	11771607	11771667	9972[gene=ENSMUSG00000018654][PH=12][PH0=1.25][P=2.4e-04]	12	+	2	ENSMUSG00000018654	Ikzf1	3'UTR	protein_coding	KNOWN	NA	NA	no
chr11	11713339	11713399	6472[gene=ENSMUSG00000018654][PH=15][PH0=1.25][P=2.2e-07]	15	+	3	ENSMUSG00000018654	Ikzf1	intron	protein_coding	KNOWN	NA	NA	yes
chr11	11771789	11771849	10015[gene=ENSMUSG00000018654][PH=11][PH0=1.25][P=2.1e-03]	11	+	3	ENSMUSG00000018654	Ikzf1	3'UTR	protein_coding	KNOWN	NA	NA	no
chr11	11713473	11713533	6500[gene=ENSMUSG00000018654][PH=12][PH0=1.25][P=2.4e-04]	12	+	2	ENSMUSG00000018654	Ikzf1	intron	protein_coding	KNOWN	NA	NA	yes
chr11	11712858	11712918	6404[gene=ENSMUSG00000018654][PH=11][PH0=1.25][P=2.1e-03]	11	+	2	ENSMUSG00000018654	Ikzf1	intron	protein_coding	KNOWN	NA	NA	yes
chr11	11771383	11771443	9910[gene=ENSMUSG00000018654][PH=29][PH0=1.25][P=1.0e-100]	29	+	4	ENSMUSG00000018654	Ikzf1	3'UTR	protein_coding	KNOWN	NA	NA	yes
chr11	11770361	11770421	9744[gene=ENSMUSG00000018654][PH=21][PH0=1.25][P=1.0e-100]	21	+	4	ENSMUSG00000018654	Ikzf1	3'UTR	protein_coding	KNOWN	NA	NA	yes
chr11	11770579	11770639	9791[gene=ENSMUSG00000018654][PH=12][PH0=1.25][P=2.4e-04]	12	+	4	ENSMUSG00000018654	Ikzf1	3'UTR	protein_coding	KNOWN	NA	NA	yes
chr11	11771577	11771637	9963[gene=ENSMUSG00000018654][PH=12][PH0=1.25][P=2.4e-04]	12	+	3	ENSMUSG00000018654	Ikzf1	3'UTR	protein_coding	KNOWN	NA	NA	yes
chr11	11717117	11717177	6857[gene=ENSMUSG00000018654][PH=41][PH0=1.25][P=1.0e-100]	41	+	4	ENSMUSG00000018654	Ikzf1	intron	protein_coding	KNOWN	NA	NA	yes
chr11	11772591	11772651	10148[gene=ENSMUSG00000018654][PH=13][PH0=1.25][P=2.5e-05]	13	+	4	ENSMUSG00000018654	Ikzf1	3'UTR	protein_coding	KNOWN	NA	NA	yes
chr11	11686517	11686577	4721[gene=ENSMUSG00000018654][PH=12][PH0=1.25][P=2.4e-04]	12	+	2	ENSMUSG00000018654	Ikzf1	intron	protein_coding	KNOWN	NA	NA	no
chr11	96913432	96913492	72853[gene=ENSMUSG00000018669][PH=3][PH0=0.03][P=9.8e-03]	3	-	2	ENSMUSG00000018669	Cdk5rap3	3'UTR|CDS	protein_coding	KNOWN	NA	NA	no
chr11	96953622	96953682	72892[gene=ENSMUSG00000018678][PH=7][PH0=0.05][P=1.4e-09]	7	-	4	ENSMUSG00000018678	Sp2	3'UTR	protein_coding	KNOWN	NA	NA	yes
chr11	84462795	84462855	59061[gene=ENSMUSG00000018697][PH=7][PH0=0.26][P=1.9e-04]	7	-	4	ENSMUSG00000018697	Aatf	intron	protein_coding	KNOWN	NA	NA	no
chr11	84465261	84465321	59118[gene=ENSMUSG00000018697][PH=6][PH0=0.26][P=4.4e-03]	6	-	3	ENSMUSG00000018697	Aatf	intron	protein_coding	KNOWN	NA	NA	no
chr11	68821584	68821644	42963[gene=ENSMUSG00000018736][PH=5][PH0=0.10][P=4.6e-04]	5	-	3	ENSMUSG00000018736	Ndel1	3'UTR	protein_coding	KNOWN	NA	NA	yes
chr11	68821600	68821660	42966[gene=ENSMUSG00000018736][PH=5][PH0=0.10][P=4.6e-04]	5	-	3	ENSMUSG00000018736	Ndel1	3'UTR	protein_coding	KNOWN	NA	NA	no
chr11	68821541	68821601	42949[gene=ENSMUSG00000018736][PH=26][PH0=0.10][P=1.0e-100]	26	-	4	ENSMUSG00000018736	Ndel1	3'UTR	protein_coding	KNOWN	NA	NA	yes
chr11	69653238	69653298	61105[gene=ENSMUSG00000018765][PH=70][PH0=0.19][P=1.0e-100]	70	+	4	ENSMUSG00000018765	Fxr2	3'UTR	protein_coding	KNOWN	NA	NA	yes
chr2	73908542	73908602	52708[gene=ENSMUSG00000018770][PH=8][PH0=0.16][P=2.1e-08]	8	-	3	ENSMUSG00000018770	Atp5g3	3'UTR	protein_coding	KNOWN	NA	NA	no
chr2	73909322	73909382	52756[gene=ENSMUSG00000018770][PH=6][PH0=0.16][P=3.5e-05]	6	-	4	ENSMUSG00000018770	Atp5g3	CDS	protein_coding	KNOWN	NA	NA	yes
chr2	73908447	73908507	52692[gene=ENSMUSG00000018770][PH=5][PH0=0.16][P=1.1e-03]	5	-	3	ENSMUSG00000018770	Atp5g3	3'UTR	protein_coding	KNOWN	NA	NA	no
chr2	73909255	73909315	52747[gene=ENSMUSG00000018770][PH=5][PH0=0.16][P=1.1e-03]	5	-	2	ENSMUSG00000018770	Atp5g3	CDS	protein_coding	KNOWN	NA	NA	no
chr19	42191357	42191417	35251[gene=ENSMUSG00000018820][PH=15][PH0=0.08][P=1.0e-100]	15	+	4	ENSMUSG00000018820	Zfyve27	3'UTR	protein_coding	KNOWN	NA	NA	yes
chr11	35787620	35787680	34550[gene=ENSMUSG00000018846][PH=9][PH0=0.48][P=1.5e-05]	9	+	4	ENSMUSG00000018846	Pank3	3'UTR	protein_coding	KNOWN	NA	NA	yes
chr11	35788358	35788418	34615[gene=ENSMUSG00000018846][PH=7][PH0=0.48][P=3.6e-03]	7	+	2	ENSMUSG00000018846	Pank3	3'UTR	protein_coding	KNOWN	NA	NA	yes
chr11	35781572	35781632	34304[gene=ENSMUSG00000018846][PH=7][PH0=0.48][P=3.6e-03]	7	+	4	ENSMUSG00000018846	Pank3	CDS	protein_coding	KNOWN	NA	NA	yes
chr11	35790915	35790975	34761[gene=ENSMUSG00000018846][PH=7][PH0=0.48][P=3.6e-03]	7	+	3	ENSMUSG00000018846	Pank3	3'UTR	protein_coding	KNOWN	NA	NA	yes
chr11	35785713	35785773	34374[gene=ENSMUSG00000018846][PH=44][PH0=0.48][P=1.8e-13]	44	+	4	ENSMUSG00000018846	Pank3	3'UTR	protein_coding	KNOWN	NA	NA	yes
chr11	35791230	35791290	34805[gene=ENSMUSG00000018846][PH=8][PH0=0.48][P=2.5e-04]	8	+	3	ENSMUSG00000018846	Pank3	3'UTR	protein_coding	KNOWN	NA	NA	yes
chr11	35791033	35791093	34783[gene=ENSMUSG00000018846][PH=18][PH0=0.48][P=1.8e-13]	18	+	4	ENSMUSG00000018846	Pank3	3'UTR	protein_coding	KNOWN	NA	NA	yes
chr11	35785889	35785949	34431[gene=ENSMUSG00000018846][PH=21][PH0=0.48][P=1.8e-13]	21	+	4	ENSMUSG00000018846	Pank3	3'UTR	protein_coding	KNOWN	NA	NA	yes
chr11	35778680	35778740	34263[gene=ENSMUSG00000018846][PH=8][PH0=0.48][P=2.5e-04]	8	+	2	ENSMUSG00000018846	Pank3	CDS	protein_coding	KNOWN	NA	NA	yes
chr11	35787717	35787777	34570[gene=ENSMUSG00000018846][PH=7][PH0=0.48][P=3.6e-03]	7	+	4	ENSMUSG00000018846	Pank3	3'UTR	protein_coding	KNOWN	NA	NA	yes
chr11	35828215	35828275	22363[gene=ENSMUSG00000018848][PH=5][PH0=0.19][P=6.7e-03]	5	-	3	ENSMUSG00000018848	Rars	intron	protein_coding	KNOWN	NA	NA	no
chr11	35829644	35829704	22389[gene=ENSMUSG00000018849][PH=3][PH0=0.01][P=2.2e-03]	3	-	2	ENSMUSG00000018848	Rars	downstream 10K|intron	protein_coding	KNOWN	NA	NA	no
chr11	53881609	53881669	33662[gene=ENSMUSG00000018900][PH=4][PH0=0.05][P=8.2e-04]	4	-	3	ENSMUSG00000018900	Slc22a5	intron	protein_coding	KNOWN	NA	NA	no
chr11	54247278	54247338	33802[gene=ENSMUSG00000018916][PH=2741][PH0=10.92][P=8.4e-13]	2741	-	4	ENSMUSG00000018916	Csf2	3'UTR	protein_coding	KNOWN	NA	NA	yes
chr11	83663506	83663566	80083[gene=ENSMUSG00000018930][PH=133][PH0=23.18][P=2.4e-12]	133	+	4	ENSMUSG00000018930	Ccl4	CDS	protein_coding	KNOWN	NA	NA	yes
chr11	83662616	83662676	79855[gene=ENSMUSG00000018930][PH=79][PH0=23.18][P=2.4e-12]	79	+	4	ENSMUSG00000018930	Ccl4	5'UTR	protein_coding	KNOWN	NA	NA	yes
chr11	83664540	83664600	80536[gene=ENSMUSG00000018930][PH=4743][PH0=23.18][P=2.4e-12]	4743	+	4	ENSMUSG00000018930	Ccl4	3'UTR	protein_coding	KNOWN	NA	NA	yes
chr11	83664276	83664336	80327[gene=ENSMUSG00000018930][PH=116][PH0=23.18][P=2.4e-12]	116	+	4	ENSMUSG00000018930	Ccl4	CDS	protein_coding	KNOWN	NA	NA	yes
chr11	60952747	60952807	56815[gene=ENSMUSG00000018932][PH=9][PH0=0.46][P=1.2e-05]	9	+	3	ENSMUSG00000018932	Map2k3	3'UTR	protein_coding	KNOWN	NA	NA	yes
chr11	60952214	60952274	56736[gene=ENSMUSG00000018932][PH=31][PH0=0.46][P=1.0e-100]	31	+	4	ENSMUSG00000018932	Map2k3	3'UTR	protein_coding	KNOWN	NA	NA	yes
chr11	60952667	60952727	56799[gene=ENSMUSG00000018932][PH=8][PH0=0.46][P=2.0e-04]	8	+	3	ENSMUSG00000018932	Map2k3	3'UTR	protein_coding	KNOWN	NA	NA	no
chr5	113742606	113742666	40223[gene=ENSMUSG00000018974][PH=4][PH0=0.07][P=4.8e-03]	4	-	2	ENSMUSG00000018974	Sart3	3'UTR	protein_coding	KNOWN	NA	NA	no
chr7	97035443	97035503	38854[gene=ENSMUSG00000018995][PH=4][PH0=0.05][P=2.3e-03]	4	+	3	ENSMUSG00000018995	Nars2	intron	protein_coding	KNOWN	NA	NA	no
chr5	136966179	136966239	61754[gene=ENSMUSG00000019054][PH=4][PH0=0.02][P=2.3e-05]	4	+	2	ENSMUSG00000019054	Fis1	3'UTR	protein_coding	KNOWN	NA	NA	no
chr7	141429752	141429812	61528[gene=ENSMUSG00000019082][PH=4][PH0=0.08][P=3.5e-03]	4	-	3	ENSMUSG00000019082	Slc25a22	3'UTR	protein_coding	KNOWN	NA	NA	no
chr7	141430859	141430919	61547[gene=ENSMUSG00000019082][PH=8][PH0=0.08][P=2.1e-10]	8	-	3	ENSMUSG00000019082	Slc25a22	3'UTR|intron	protein_coding	KNOWN	NA	NA	yes
chrX	74304344	74304404	14345[gene=ENSMUSG00000019087][PH=6][PH0=0.18][P=9.6e-05]	6	+	3	ENSMUSG00000019087	Atp6ap1	3'UTR	protein_coding	KNOWN	NA	NA	no
chr13	24804803	24804863	16400[gene=ENSMUSG00000019132][PH=6][PH0=0.33][P=4.0e-03]	6	+	3	ENSMUSG00000019132	BC005537	CDS	protein_coding	KNOWN	NA	NA	no
chr13	24802088	24802148	16260[gene=ENSMUSG00000019132][PH=7][PH0=0.33][P=2.2e-04]	7	+	3	ENSMUSG00000019132	BC005537	5'UTR|CDS	protein_coding	KNOWN	NA	NA	yes
chr13	24812994	24813054	16511[gene=ENSMUSG00000019132][PH=6][PH0=0.33][P=4.0e-03]	6	+	3	ENSMUSG00000019132	BC005537	3'UTR	protein_coding	KNOWN	NA	NA	no
chr13	24803124	24803184	16316[gene=ENSMUSG00000019132][PH=7][PH0=0.33][P=2.2e-04]	7	+	3	ENSMUSG00000019132	BC005537	5'UTR|intron	protein_coding	KNOWN	NA	NA	no
chr13	24803246	24803306	16329[gene=ENSMUSG00000019132][PH=9][PH0=0.33][P=4.3e-07]	9	+	3	ENSMUSG00000019132	BC005537	5'UTR|intron	protein_coding	KNOWN	NA	NA	no
chr13	24803308	24803368	16344[gene=ENSMUSG00000019132][PH=7][PH0=0.33][P=2.2e-04]	7	+	4	ENSMUSG00000019132	BC005537	5'UTR|intron	protein_coding	KNOWN	NA	NA	no
chr13	24812903	24812963	16496[gene=ENSMUSG00000019132][PH=8][PH0=0.33][P=1.0e-05]	8	+	3	ENSMUSG00000019132	BC005537	3'UTR	protein_coding	KNOWN	NA	NA	no
chr13	24802565	24802625	16286[gene=ENSMUSG00000019132][PH=6][PH0=0.33][P=4.0e-03]	6	+	2	ENSMUSG00000019132	BC005537	5'UTR|intron	protein_coding	KNOWN	NA	NA	no
chr11	100715286	100715346	82858[gene=ENSMUSG00000019173][PH=15][PH0=0.11][P=1.0e-100]	15	-	3	ENSMUSG00000019173	Rab5c	3'UTR	protein_coding	KNOWN	NA	NA	yes
chr11	100715147	100715207	82839[gene=ENSMUSG00000019173][PH=9][PH0=0.11][P=3.9e-11]	9	-	4	ENSMUSG00000019173	Rab5c	3'UTR	protein_coding	KNOWN	NA	NA	yes
chr5	135790248	135790308	61518[gene=ENSMUSG00000019179][PH=22][PH0=0.18][P=1.0e-100]	22	+	4	ENSMUSG00000019179	Mdh2	3'UTR	protein_coding	KNOWN	NA	NA	yes
chr5	135779640	135779700	61386[gene=ENSMUSG00000019179][PH=6][PH0=0.18][P=1.1e-04]	6	+	3	ENSMUSG00000019179	Mdh2	intron	protein_coding	KNOWN	NA	NA	yes
chr2	152685814	152685874	110210[gene=ENSMUSG00000019188][PH=7][PH0=0.21][P=2.5e-05]	7	+	2	ENSMUSG00000019188	H13	intron	protein_coding	KNOWN	NA	NA	no
chr2	152704981	152705041	110443[gene=ENSMUSG00000019188][PH=10][PH0=0.21][P=4.6e-10]	10	+	3	ENSMUSG00000019188	H13	3'UTR	protein_coding	KNOWN	NA	NA	no
chr2	152695471	152695531	110341[gene=ENSMUSG00000019188][PH=6][PH0=0.21][P=7.0e-04]	6	+	3	ENSMUSG00000019188	H13	CDS|downstream 10K	protein_coding	KNOWN	NA	NA	no
chr11	44537711	44537771	35856[gene=ENSMUSG00000019189][PH=7][PH0=0.30][P=3.0e-04]	7	+	3	ENSMUSG00000019189	Rnf145	intron	protein_coding	KNOWN	NA	NA	no
chr11	44565097	44565157	36284[gene=ENSMUSG00000019189][PH=8][PH0=0.30][P=1.3e-05]	8	+	3	ENSMUSG00000019189	Rnf145	3'UTR	protein_coding	KNOWN	NA	NA	no
chr11	44564964	44565024	36270[gene=ENSMUSG00000019189][PH=7][PH0=0.30][P=3.0e-04]	7	+	4	ENSMUSG00000019189	Rnf145	3'UTR	protein_coding	KNOWN	NA	NA	yes
chr11	44564485	44564545	36238[gene=ENSMUSG00000019189][PH=13][PH0=0.30][P=3.2e-13]	13	+	4	ENSMUSG00000019189	Rnf145	3'UTR	protein_coding	KNOWN	NA	NA	yes
chr11	44561478	44561538	36181[gene=ENSMUSG00000019189][PH=16][PH0=0.30][P=1.0e-100]	16	+	4	ENSMUSG00000019189	Rnf145	CDS|downstream 10K	protein_coding	KNOWN	NA	NA	yes
chr11	44565345	44565405	36313[gene=ENSMUSG00000019189][PH=13][PH0=0.30][P=3.2e-13]	13	+	4	ENSMUSG00000019189	Rnf145	3'UTR	protein_coding	KNOWN	NA	NA	no
chr11	44565436	44565496	36329[gene=ENSMUSG00000019189][PH=7][PH0=0.30][P=3.0e-04]	7	+	3	ENSMUSG00000019189	Rnf145	3'UTR	protein_coding	KNOWN	NA	NA	no
chr6	120795229	120795289	62864[gene=ENSMUSG00000019210][PH=26][PH0=0.10][P=2.1e-13]	26	-	4	ENSMUSG00000019210	Atp6v1e1	3'UTR	protein_coding	KNOWN	NA	NA	yes
chr12	35499825	35499885	6528[gene=ENSMUSG00000019256][PH=4][PH0=0.06][P=1.8e-03]	4	-	2	ENSMUSG00000019256	Ahr	3'UTR	protein_coding	KNOWN	NA	NA	no
chr12	35499966	35500026	6539[gene=ENSMUSG00000019256][PH=5][PH0=0.06][P=2.5e-05]	5	-	1	ENSMUSG00000019256	Ahr	3'UTR	protein_coding	KNOWN	NA	NA	no
chr7	16915409	16915469	2524[gene=ENSMUSG00000019370][PH=13][PH0=0.08][P=1.0e-100]	13	-	3	ENSMUSG00000019370	Calm3	3'UTR	protein_coding	KNOWN	NA	NA	no
chr7	16915925	16915985	2551[gene=ENSMUSG00000019370][PH=4][PH0=0.08][P=3.2e-03]	4	-	2	ENSMUSG00000019370	Calm3	3'UTR|intron	protein_coding	KNOWN	NA	NA	no
chr7	16915852	16915912	2541[gene=ENSMUSG00000019370][PH=6][PH0=0.08][P=1.1e-06]	6	-	1	ENSMUSG00000019370	Calm3	3'UTR|intron	protein_coding	KNOWN	NA	NA	no
chr11	59827873	59827933	37453[gene=ENSMUSG00000019373][PH=4][PH0=0.08][P=4.9e-03]	4	-	3	ENSMUSG00000019373	Cops3	CDS	protein_coding	KNOWN	NA	NA	no
chr17	35247200	35247260	27328[gene=ENSMUSG00000024403][PH=195][PH0=0.83][P=1.0e-100]	195	+	4	ENSMUSG00000019432	Ddx39b	downstream 10K|intron	protein_coding	KNOWN	NA	NA	yes
chr17	35249875	35249935	27419[gene=ENSMUSG00000019432][PH=14][PH0=0.76][P=8.5e-10]	14	+	4	ENSMUSG00000019432	Ddx39b	intron	protein_coding	KNOWN	NA	NA	no
chr17	35242704	35242764	27197[gene=ENSMUSG00000024403][PH=56][PH0=0.83][P=1.0e-100]	56	+	4	ENSMUSG00000019432	Ddx39b	5'UTR|downstream 10K|intron	protein_coding	KNOWN	NA	NA	yes
chr17	57250756	57250816	38506[gene=ENSMUSG00000019487][PH=3][PH0=0.03][P=7.3e-03]	3	+	2	ENSMUSG00000019487	Trip10	CDS	protein_coding	KNOWN	NA	NA	no
chr3	20122412	20122472	2185[gene=ENSMUSG00000019528][PH=5][PH0=0.04][P=2.7e-06]	5	-	3	ENSMUSG00000019528	Gyg	3'UTR	protein_coding	KNOWN	NA	NA	no
chr10	79952537	79952597	54953[gene=ENSMUSG00000019564][PH=8][PH0=0.11][P=2.6e-09]	8	+	3	ENSMUSG00000019564	Arid3a	3'UTR	protein_coding	KNOWN	NA	NA	no
chr10	79952584	79952644	54963[gene=ENSMUSG00000019564][PH=6][PH0=0.11][P=9.7e-06]	6	+	4	ENSMUSG00000019564	Arid3a	3'UTR	protein_coding	KNOWN	NA	NA	no
chr17	56068241	56068301	39348[gene=ENSMUSG00000019578][PH=3][PH0=0.03][P=3.9e-03]	3	-	3	ENSMUSG00000019578	Ubxn6	3'UTR	protein_coding	KNOWN	NA	NA	yes
chr6	38533955	38534015	23379[gene=ENSMUSG00000019689][PH=3][PH0=0.01][P=6.4e-04]	3	+	3	ENSMUSG00000019689	1110001J03Rik	downstream 10K|intron	protein_coding	KNOWN	NA	tRNA-Arg-AGG	yes
chr1	177024539	177024599	122931[gene=ENSMUSG00000019699][PH=4][PH0=0.06][P=9.9e-03]	4	-	3	ENSMUSG00000019699	Akt3	3'UTR|intron	protein_coding	KNOWN	NA	NA	no
chr2	29947803	29947863	43777[gene=ENSMUSG00000019715][PH=4][PH0=0.04][P=3.3e-04]	4	+	2	ENSMUSG00000019715	Gle1	intron	protein_coding	KNOWN	NA	NA	no
chr13	13677712	13677772	7068[gene=ENSMUSG00000019726][PH=5][PH0=0.12][P=4.3e-03]	5	+	3	ENSMUSG00000019726	Lyst	CDS	protein_coding	KNOWN	NA	NA	yes
chr8	72480859	72480919	15714[gene=ENSMUSG00000019731][PH=11][PH0=0.15][P=1.2e-13]	11	-	3	ENSMUSG00000019731	Slc35e1	3'UTR	protein_coding	KNOWN	NA	NA	no
chr8	72480995	72481055	15735[gene=ENSMUSG00000019731][PH=7][PH0=0.15][P=1.3e-06]	7	-	3	ENSMUSG00000019731	Slc35e1	3'UTR	protein_coding	KNOWN	NA	NA	yes
chr10	5799187	5799247	133[gene=ENSMUSG00000019773][PH=4][PH0=0.05][P=5.9e-04]	4	-	3	ENSMUSG00000019773	Fbxo5	3'UTR	protein_coding	KNOWN	NA	NA	no
chr10	37001764	37001824	27339[gene=ENSMUSG00000019777][PH=30][PH0=0.15][P=1.0e-100]	30	+	4	ENSMUSG00000019777	Hdac2	3'UTR	protein_coding	KNOWN	NA	NA	yes
chr10	34001901	34001961	20514[gene=ENSMUSG00000019782][PH=4][PH0=0.08][P=6.0e-03]	4	-	2	ENSMUSG00000019782	Rwdd1	intron	protein_coding	KNOWN	NA	NA	no
chr10	9786264	9786324	4332[gene=ENSMUSG00000019790][PH=5][PH0=0.13][P=4.8e-03]	5	-	2	ENSMUSG00000019790	Stxbp5	intron	protein_coding	KNOWN	NA	NA	no
chr10	7759718	7759778	2078[gene=ENSMUSG00000019794][PH=8][PH0=0.08][P=2.5e-10]	8	+	4	ENSMUSG00000019794	Katna1	CDS|downstream 10K	protein_coding	KNOWN	NA	NA	yes
chr10	7637764	7637824	817[gene=ENSMUSG00000019795][PH=13][PH0=0.06][P=1.0e-100]	13	-	2	ENSMUSG00000019795	Pcmt1	3'UTR|intron	protein_coding	KNOWN	NA	NA	yes
chr10	42535138	42535198	35644[gene=ENSMUSG00000019804][PH=12][PH0=0.09][P=1.2e-13]	12	+	4	ENSMUSG00000019804	Snx3	3'UTR	protein_coding	KNOWN	NA	NA	yes
chr10	13793472	13793532	14539[gene=ENSMUSG00000019806][PH=7][PH0=0.21][P=1.0e-04]	7	-	4	ENSMUSG00000019806	Aig1	intron	protein_coding	KNOWN	NA	NA	no
chr10	13179640	13179700	8484[gene=ENSMUSG00000019814][PH=4][PH0=0.09][P=6.8e-03]	4	-	2	ENSMUSG00000019814	Ltv1	CDS	protein_coding	KNOWN	NA	NA	no
chr10	13178614	13178674	8457[gene=ENSMUSG00000019814][PH=6][PH0=0.09][P=3.0e-06]	6	-	3	ENSMUSG00000019814	Ltv1	3'UTR	protein_coding	KNOWN	NA	NA	no
chr10	41529776	41529836	35123[gene=ENSMUSG00000019818][PH=8][PH0=0.28][P=2.7e-06]	8	+	4	ENSMUSG00000019818	Cd164	3'UTR	protein_coding	KNOWN	NA	NA	no
chr10	41530377	41530437	35171[gene=ENSMUSG00000019818][PH=7][PH0=0.28][P=6.8e-05]	7	+	3	ENSMUSG00000019818	Cd164	3'UTR	protein_coding	KNOWN	NA	NA	no
chr10	41529626	41529686	35099[gene=ENSMUSG00000019818][PH=10][PH0=0.28][P=2.9e-09]	10	+	4	ENSMUSG00000019818	Cd164	3'UTR	protein_coding	KNOWN	NA	NA	yes
chr10	41530975	41531035	35231[gene=ENSMUSG00000019818][PH=11][PH0=0.28][P=8.0e-11]	11	+	3	ENSMUSG00000019818	Cd164	3'UTR	protein_coding	KNOWN	NA	NA	yes
chr10	41529368	41529428	35068[gene=ENSMUSG00000019818][PH=10][PH0=0.28][P=2.9e-09]	10	+	3	ENSMUSG00000019818	Cd164	3'UTR	protein_coding	KNOWN	NA	NA	no
chr10	12382851	12382911	5181[gene=ENSMUSG00000019820][PH=19][PH0=0.12][P=1.4e-12]	19	-	4	ENSMUSG00000019820	Utrn	3'UTR	protein_coding	KNOWN	NA	NA	yes
chr10	12383376	12383436	5213[gene=ENSMUSG00000019820][PH=6][PH0=0.12][P=2.6e-04]	6	-	3	ENSMUSG00000019820	Utrn	3'UTR	protein_coding	KNOWN	NA	NA	yes
chr10	39395552	39395612	28032[gene=ENSMUSG00000019843][PH=10][PH0=0.65][P=9.6e-05]	10	+	2	ENSMUSG00000019843	Fyn	intron	protein_coding	KNOWN	NA	NA	no
chr10	39528857	39528917	32880[gene=ENSMUSG00000019843][PH=11][PH0=0.65][P=6.3e-06]	11	+	3	ENSMUSG00000019843	Fyn	intron	protein_coding	KNOWN	NA	NA	no
chr10	39400708	39400768	28346[gene=ENSMUSG00000019843][PH=9][PH0=0.65][P=1.3e-03]	9	+	2	ENSMUSG00000019843	Fyn	intron	protein_coding	KNOWN	NA	NA	no
chr10	39398740	39398800	28230[gene=ENSMUSG00000019843][PH=12][PH0=0.65][P=3.8e-07]	12	+	3	ENSMUSG00000019843	Fyn	intron	protein_coding	KNOWN	NA	NA	no
chr10	39529180	39529240	32919[gene=ENSMUSG00000019843][PH=9][PH0=0.65][P=1.3e-03]	9	+	4	ENSMUSG00000019843	Fyn	intron	protein_coding	KNOWN	NA	NA	no
chr10	39434861	39434921	29976[gene=ENSMUSG00000019843][PH=9][PH0=0.65][P=1.3e-03]	9	+	3	ENSMUSG00000019843	Fyn	intron	protein_coding	KNOWN	NA	NA	no
chr10	39402364	39402424	28443[gene=ENSMUSG00000019843][PH=9][PH0=0.65][P=1.3e-03]	9	+	2	ENSMUSG00000019843	Fyn	intron	protein_coding	KNOWN	NA	NA	yes
chr10	39564910	39564970	33839[gene=ENSMUSG00000019843][PH=12][PH0=0.65][P=3.8e-07]	12	+	4	ENSMUSG00000019843	Fyn	3'UTR	protein_coding	KNOWN	NA	NA	yes
chr10	39397163	39397223	28108[gene=ENSMUSG00000019843][PH=16][PH0=0.65][P=2.3e-12]	16	+	3	ENSMUSG00000019843	Fyn	intron	protein_coding	KNOWN	NA	NA	no
chr10	19001260	19001320	16954[gene=ENSMUSG00000019850][PH=15][PH0=1.25][P=5.6e-08]	15	-	3	ENSMUSG00000019850	Tnfaip3	3'UTR	protein_coding	KNOWN	NA	NA	yes
chr10	19001734	19001794	17062[gene=ENSMUSG00000019850][PH=72][PH0=1.25][P=1.0e-100]	72	-	4	ENSMUSG00000019850	Tnfaip3	3'UTR	protein_coding	KNOWN	NA	NA	yes
chr10	19001888	19001948	17112[gene=ENSMUSG00000019850][PH=20][PH0=1.25][P=7.0e-14]	20	-	4	ENSMUSG00000019850	Tnfaip3	3'UTR	protein_coding	KNOWN	NA	NA	yes
chr10	19001117	19001177	16929[gene=ENSMUSG00000019850][PH=13][PH0=1.25][P=6.4e-06]	13	-	2	ENSMUSG00000019850	Tnfaip3	3'UTR	protein_coding	KNOWN	NA	NA	yes
chr10	19001079	19001139	16913[gene=ENSMUSG00000019850][PH=10][PH0=1.25][P=4.1e-03]	10	-	3	ENSMUSG00000019850	Tnfaip3	3'UTR	protein_coding	KNOWN	NA	NA	yes
chr10	19001005	19001065	16868[gene=ENSMUSG00000019850][PH=77][PH0=1.25][P=1.0e-100]	77	-	4	ENSMUSG00000019850	Tnfaip3	3'UTR	protein_coding	KNOWN	NA	NA	yes
chr10	18856322	18856382	9425[gene=ENSMUSG00000019851][PH=7][PH0=0.14][P=5.5e-07]	7	+	3	ENSMUSG00000019851	Perp	3'UTR	protein_coding	KNOWN	NA	NA	no
chr10	18125083	18125143	9270[gene=ENSMUSG00000019854][PH=8][PH0=0.15][P=1.0e-07]	8	+	3	ENSMUSG00000019854	Reps1	3'UTR	protein_coding	KNOWN	NA	NA	no
chr10	43951544	43951604	22912[gene=ENSMUSG00000019866][PH=6][PH0=0.25][P=2.8e-03]	6	-	3	ENSMUSG00000019866	Aim1	3'UTR	protein_coding	KNOWN	NA	NA	no
chr10	43961506	43961566	23063[gene=ENSMUSG00000019866][PH=7][PH0=0.25][P=1.2e-04]	7	-	3	ENSMUSG00000019866	Aim1	CDS	protein_coding	KNOWN	NA	NA	no
chr10	43975126	43975186	23283[gene=ENSMUSG00000019866][PH=38][PH0=0.25][P=3.7e-13]	38	-	4	ENSMUSG00000019866	Aim1	CDS	protein_coding	KNOWN	NA	NA	yes
chr10	43958325	43958385	23011[gene=ENSMUSG00000019866][PH=6][PH0=0.25][P=2.8e-03]	6	-	3	ENSMUSG00000019866	Aim1	CDS	protein_coding	KNOWN	NA	NA	no
chr10	43951757	43951817	22933[gene=ENSMUSG00000019866][PH=7][PH0=0.25][P=1.2e-04]	7	-	4	ENSMUSG00000019866	Aim1	3'UTR	protein_coding	KNOWN	NA	NA	yes
chr10	43951138	43951198	22855[gene=ENSMUSG00000019866][PH=37][PH0=0.25][P=3.7e-13]	37	-	4	ENSMUSG00000019866	Aim1	3'UTR	protein_coding	KNOWN	NA	NA	yes
chr10	57811747	57811807	41935[gene=ENSMUSG00000019872][PH=3][PH0=0.02][P=1.7e-03]	3	+	3	ENSMUSG00000019872	Smpdl3a	3'UTR	protein_coding	KNOWN	NA	NA	yes
chr10	57515890	57515950	32914[gene=ENSMUSG00000019877][PH=25][PH0=0.42][P=7.6e-14]	25	-	4	ENSMUSG00000019877	Serinc1	3'UTR	protein_coding	KNOWN	NA	NA	yes
chr10	57516354	57516414	32990[gene=ENSMUSG00000019877][PH=7][PH0=0.42][P=1.4e-03]	7	-	3	ENSMUSG00000019877	Serinc1	3'UTR	protein_coding	KNOWN	NA	NA	no
chr10	57523986	57524046	33167[gene=ENSMUSG00000019877][PH=11][PH0=0.42][P=9.2e-09]	11	-	3	ENSMUSG00000019877	Serinc1	3'UTR|CDS|intron	protein_coding	KNOWN	NA	NA	yes
chr10	57516244	57516304	32976[gene=ENSMUSG00000019877][PH=8][PH0=0.42][P=8.6e-05]	8	-	2	ENSMUSG00000019877	Serinc1	3'UTR	protein_coding	KNOWN	NA	NA	yes
chr10	57515965	57516025	32942[gene=ENSMUSG00000019877][PH=13][PH0=0.42][P=1.3e-11]	13	-	4	ENSMUSG00000019877	Serinc1	3'UTR	protein_coding	KNOWN	NA	NA	yes
chr10	57512270	57512330	41828[gene=ENSMUSG00000019878][PH=7][PH0=0.10][P=1.6e-07]	7	+	3	ENSMUSG00000019878	Hsf2	3'UTR	protein_coding	KNOWN	NA	NA	yes
chr10	57512246	57512306	41822[gene=ENSMUSG00000019878][PH=5][PH0=0.10][P=4.3e-04]	5	+	3	ENSMUSG00000019878	Hsf2	3'UTR	protein_coding	KNOWN	NA	NA	yes
chr10	108262682	108262742	85019[gene=ENSMUSG00000019907][PH=7][PH0=0.36][P=2.4e-03]	7	+	2	ENSMUSG00000019907	Ppp1r12a	intron	protein_coding	KNOWN	NA	NA	no
chr10	59361894	59361954	44628[gene=ENSMUSG00000019916][PH=10][PH0=0.17][P=8.6e-11]	10	+	4	ENSMUSG00000019916	P4ha1	CDS	protein_coding	KNOWN	NA	NA	yes
chr10	59371582	59371642	44743[gene=ENSMUSG00000019916][PH=7][PH0=0.17][P=8.3e-06]	7	+	3	ENSMUSG00000019916	P4ha1	3'UTR	protein_coding	KNOWN	NA	NA	no
chr10	59371327	59371387	44730[gene=ENSMUSG00000019916][PH=5][PH0=0.17][P=8.1e-03]	5	+	3	ENSMUSG00000019916	P4ha1	3'UTR	protein_coding	KNOWN	NA	NA	no
chr10	59371361	59371421	44732[gene=ENSMUSG00000019916][PH=5][PH0=0.17][P=8.1e-03]	5	+	3	ENSMUSG00000019916	P4ha1	3'UTR	protein_coding	KNOWN	NA	NA	no
chr10	59371906	59371966	44771[gene=ENSMUSG00000019916][PH=7][PH0=0.17][P=8.3e-06]	7	+	3	ENSMUSG00000019916	P4ha1	3'UTR	protein_coding	KNOWN	NA	NA	no
chr10	59164505	59164565	33368[gene=ENSMUSG00000019917][PH=3][PH0=0.00][P=5.7e-05]	3	-	2	ENSMUSG00000019917	2017-09-10	3'UTR	protein_coding	KNOWN	NA	NA	no
chr10	58422319	58422379	43089[gene=ENSMUSG00000019920][PH=6][PH0=0.20][P=1.3e-03]	6	+	2	ENSMUSG00000019920	Lims1	3'UTR	protein_coding	KNOWN	NA	NA	no
chr10	72660066	72660126	50651[gene=ENSMUSG00000019923][PH=11][PH0=0.26][P=5.0e-11]	11	+	4	ENSMUSG00000019923	Zwint	downstream 10K|intron	protein_coding	KNOWN	NA	NA	yes
chr10	71254994	71255054	47013[gene=ENSMUSG00000019927][PH=5][PH0=0.07][P=7.6e-05]	5	-	3	ENSMUSG00000019927	Ube2d1	3'UTR	protein_coding	KNOWN	NA	NA	no
chr10	69338319	69338379	46856[gene=ENSMUSG00000019942][PH=6][PH0=0.07][P=5.3e-07]	6	-	3	ENSMUSG00000019942	Cdk1	3'UTR	protein_coding	KNOWN	NA	NA	yes
chr10	99009524	99009584	82354[gene=ENSMUSG00000019943][PH=8][PH0=0.46][P=7.4e-04]	8	+	4	ENSMUSG00000019943	Atp2b1	CDS	protein_coding	KNOWN	NA	NA	no
chr10	98968892	98968952	81466[gene=ENSMUSG00000019943][PH=10][PH0=0.46][P=2.2e-06]	10	+	3	ENSMUSG00000019943	Atp2b1	5'UTR|CDS	protein_coding	KNOWN	NA	NA	no
chr10	99009454	99009514	82339[gene=ENSMUSG00000019943][PH=12][PH0=0.46][P=4.3e-09]	12	+	4	ENSMUSG00000019943	Atp2b1	CDS	protein_coding	KNOWN	NA	NA	yes
chr10	99023237	99023297	82754[gene=ENSMUSG00000019943][PH=17][PH0=0.46][P=3.4e-13]	17	+	3	ENSMUSG00000019943	Atp2b1	3'UTR	protein_coding	KNOWN	NA	NA	yes
chr10	98979815	98979875	81669[gene=ENSMUSG00000019943][PH=9][PH0=0.46][P=4.3e-05]	9	+	3	ENSMUSG00000019943	Atp2b1	CDS	protein_coding	KNOWN	NA	NA	no
chr10	99026089	99026149	82900[gene=ENSMUSG00000019943][PH=9][PH0=0.46][P=4.3e-05]	9	+	4	ENSMUSG00000019943	Atp2b1	3'UTR	protein_coding	KNOWN	NA	NA	no
chr10	68278020	68278080	46802[gene=ENSMUSG00000019947][PH=8][PH0=0.58][P=6.8e-03]	8	-	4	ENSMUSG00000019947	Arid5b	CDS	protein_coding	KNOWN	NA	NA	no
chr10	68220567	68220627	44370[gene=ENSMUSG00000019947][PH=8][PH0=0.58][P=6.8e-03]	8	-	3	ENSMUSG00000019947	Arid5b	intron	protein_coding	KNOWN	NA	NA	no
chr10	68273006	68273066	46466[gene=ENSMUSG00000019947][PH=8][PH0=0.58][P=6.8e-03]	8	-	3	ENSMUSG00000019947	Arid5b	intron	protein_coding	KNOWN	NA	NA	yes
chr10	68208592	68208652	43946[gene=ENSMUSG00000019947][PH=10][PH0=0.58][P=3.3e-05]	10	-	4	ENSMUSG00000019947	Arid5b	intron	protein_coding	KNOWN	NA	NA	yes
chr10	68276063	68276123	46674[gene=ENSMUSG00000019947][PH=8][PH0=0.58][P=6.8e-03]	8	-	3	ENSMUSG00000019947	Arid5b	intron	protein_coding	KNOWN	NA	NA	no
chr10	68248542	68248602	45301[gene=ENSMUSG00000019947][PH=8][PH0=0.58][P=6.8e-03]	8	-	3	ENSMUSG00000019947	Arid5b	intron	protein_coding	KNOWN	NA	NA	no
chr10	68230940	68231000	44713[gene=ENSMUSG00000019947][PH=9][PH0=0.58][P=5.0e-04]	9	-	4	ENSMUSG00000019947	Arid5b	intron	protein_coding	KNOWN	NA	NA	yes
chr10	89818804	89818864	69917[gene=ENSMUSG00000019951][PH=6][PH0=0.23][P=2.3e-03]	6	+	2	ENSMUSG00000019951	Uhrf1bp1l	3'UTR	protein_coding	KNOWN	NA	NA	no
chr10	89818525	89818585	69896[gene=ENSMUSG00000019951][PH=6][PH0=0.23][P=2.3e-03]	6	+	3	ENSMUSG00000019951	Uhrf1bp1l	3'UTR	protein_coding	KNOWN	NA	NA	no
chr10	89818790	89818850	69914[gene=ENSMUSG00000019951][PH=6][PH0=0.23][P=2.3e-03]	6	+	3	ENSMUSG00000019951	Uhrf1bp1l	3'UTR	protein_coding	KNOWN	NA	NA	no
chr10	89818481	89818541	69888[gene=ENSMUSG00000019951][PH=12][PH0=0.23][P=1.2e-12]	12	+	4	ENSMUSG00000019951	Uhrf1bp1l	3'UTR	protein_coding	KNOWN	NA	NA	no
chr10	99110856	99110916	82973[gene=ENSMUSG00000019952][PH=3][PH0=0.02][P=5.1e-03]	3	+	2	ENSMUSG00000019952	Poc1b	3'UTR|intron	protein_coding	KNOWN	NA	NA	no
chr10	99267435	99267495	83159[gene=ENSMUSG00000019960][PH=25][PH0=0.24][P=1.0e-100]	25	+	4	ENSMUSG00000019960	Dusp6	3'UTR	protein_coding	KNOWN	NA	NA	yes
chr10	99267191	99267251	83118[gene=ENSMUSG00000019960][PH=6][PH0=0.24][P=4.0e-04]	6	+	4	ENSMUSG00000019960	Dusp6	3'UTR	protein_coding	KNOWN	NA	NA	no
chr10	91148151	91148211	57421[gene=ENSMUSG00000019961][PH=6][PH0=0.22][P=5.6e-04]	6	-	3	ENSMUSG00000019961	Tmpo	3'UTR	protein_coding	KNOWN	NA	NA	yes
chr10	91160751	91160811	57629[gene=ENSMUSG00000019961][PH=7][PH0=0.22][P=2.0e-05]	7	-	3	ENSMUSG00000019961	Tmpo	3'UTR|intron	protein_coding	KNOWN	NA	NA	yes
chr10	91156161	91156221	57548[gene=ENSMUSG00000019961][PH=6][PH0=0.22][P=5.6e-04]	6	-	2	ENSMUSG00000019961	Tmpo	downstream 10K|intron	protein_coding	KNOWN	NA	NA	no
chr10	21999728	21999788	14362[gene=ENSMUSG00000019970][PH=3][PH0=0.01][P=1.5e-03]	3	+	3	ENSMUSG00000019970	Sgk1	3'UTR	protein_coding	KNOWN	NA	NA	no
chr10	21999706	21999766	14360[gene=ENSMUSG00000019970][PH=3][PH0=0.01][P=1.5e-03]	3	+	3	ENSMUSG00000019970	Sgk1	3'UTR	protein_coding	KNOWN	NA	NA	no
chr10	21999542	21999602	14347[gene=ENSMUSG00000019970][PH=4][PH0=0.01][P=5.0e-06]	4	+	2	ENSMUSG00000019970	Sgk1	3'UTR	protein_coding	KNOWN	NA	NA	no
chr10	21999678	21999738	14356[gene=ENSMUSG00000019970][PH=5][PH0=0.01][P=1.2e-08]	5	+	3	ENSMUSG00000019970	Sgk1	3'UTR	protein_coding	KNOWN	NA	NA	no
chr10	91102531	91102591	70014[gene=ENSMUSG00000019975][PH=3][PH0=0.01][P=1.1e-04]	3	+	2	ENSMUSG00000019975	Ikbip	3'UTR	protein_coding	KNOWN	NA	NA	no
chr10	90989355	90989415	56808[gene=ENSMUSG00000019979][PH=9][PH0=0.04][P=2.9e-13]	9	-	4	ENSMUSG00000019979	Apaf1	3'UTR	protein_coding	KNOWN	NA	NA	yes
chr10	24905826	24905886	14824[gene=ENSMUSG00000019984][PH=5][PH0=0.06][P=5.4e-05]	5	+	3	ENSMUSG00000019984	Med23	3'UTR|CDS	protein_coding	KNOWN	NA	NA	no
chr10	24913095	24913155	14852[gene=ENSMUSG00000099181][PH=3][PH0=0.04][P=7.1e-03]	3	+	3	ENSMUSG00000019984	Med23	3'UTR	protein_coding	KNOWN	NA	NA	yes
chr10	21079805	21079865	13828[gene=ENSMUSG00000019986][PH=5][PH0=0.04][P=1.4e-05]	5	+	3	ENSMUSG00000019986	Ahi1	3'UTR	protein_coding	KNOWN	NA	NA	yes
chr10	24187974	24188034	14541[gene=ENSMUSG00000019998][PH=11][PH0=0.05][P=1.4e-13]	11	+	4	ENSMUSG00000019998	Stx7	3'UTR	protein_coding	KNOWN	NA	NA	yes
chr10	24188080	24188140	14563[gene=ENSMUSG00000019998][PH=11][PH0=0.05][P=1.4e-13]	11	+	4	ENSMUSG00000019998	Stx7	3'UTR	protein_coding	KNOWN	NA	NA	no
chr10	19610039	19610099	9651[gene=ENSMUSG00000020009][PH=4][PH0=0.07][P=3.4e-03]	4	+	2	ENSMUSG00000020009	Ifngr1	3'UTR	protein_coding	KNOWN	NA	NA	no
chr10	93241062	93241122	74265[gene=ENSMUSG00000020015][PH=11][PH0=1.10][P=5.5e-04]	11	+	4	ENSMUSG00000020015	Cdk17	3'UTR	protein_coding	KNOWN	NA	NA	yes
chr10	93240994	93241054	74235[gene=ENSMUSG00000020015][PH=40][PH0=1.10][P=1.0e-100]	40	+	4	ENSMUSG00000020015	Cdk17	3'UTR	protein_coding	KNOWN	NA	NA	yes
chr10	93241281	93241341	74289[gene=ENSMUSG00000020015][PH=11][PH0=1.10][P=5.5e-04]	11	+	3	ENSMUSG00000020015	Cdk17	3'UTR	protein_coding	KNOWN	NA	NA	no
chr10	93167814	93167874	70602[gene=ENSMUSG00000020015][PH=10][PH0=1.10][P=4.9e-03]	10	+	4	ENSMUSG00000020015	Cdk17	intron	protein_coding	KNOWN	NA	NA	no
chr10	93240440	93240500	74120[gene=ENSMUSG00000020015][PH=17][PH0=1.10][P=1.8e-10]	17	+	3	ENSMUSG00000020015	Cdk17	3'UTR	protein_coding	KNOWN	NA	NA	yes
chr10	93165029	93165089	70408[gene=ENSMUSG00000020015][PH=15][PH0=1.10][P=3.4e-08]	15	+	4	ENSMUSG00000020015	Cdk17	intron	protein_coding	KNOWN	NA	NA	no
chr10	93192437	93192497	72038[gene=ENSMUSG00000020015][PH=10][PH0=1.10][P=4.9e-03]	10	+	4	ENSMUSG00000020015	Cdk17	intron	protein_coding	KNOWN	NA	NA	no
chr10	93240915	93240975	74198[gene=ENSMUSG00000020015][PH=11][PH0=1.10][P=5.5e-04]	11	+	3	ENSMUSG00000020015	Cdk17	3'UTR	protein_coding	KNOWN	NA	NA	yes
chr10	93239905	93239965	73924[gene=ENSMUSG00000020015][PH=41][PH0=1.10][P=1.0e-100]	41	+	4	ENSMUSG00000020015	Cdk17	3'UTR	protein_coding	KNOWN	NA	NA	yes
chr10	93240341	93240401	74090[gene=ENSMUSG00000020015][PH=20][PH0=1.10][P=1.0e-100]	20	+	4	ENSMUSG00000020015	Cdk17	3'UTR	protein_coding	KNOWN	NA	NA	yes
chr10	93210063	93210123	72754[gene=ENSMUSG00000020015][PH=12][PH0=1.10][P=5.5e-05]	12	+	3	ENSMUSG00000020015	Cdk17	intron	protein_coding	KNOWN	NA	NA	no
chr10	93240086	93240146	74010[gene=ENSMUSG00000020015][PH=46][PH0=1.10][P=1.0e-100]	46	+	4	ENSMUSG00000020015	Cdk17	3'UTR	protein_coding	KNOWN	NA	NA	yes
chr10	93239805	93239865	73897[gene=ENSMUSG00000020015][PH=14][PH0=1.10][P=4.3e-07]	14	+	4	ENSMUSG00000020015	Cdk17	3'UTR	protein_coding	KNOWN	NA	NA	yes
chr10	93176304	93176364	71191[gene=ENSMUSG00000020015][PH=12][PH0=1.10][P=5.5e-05]	12	+	4	ENSMUSG00000020015	Cdk17	intron	protein_coding	KNOWN	NA	NA	no
chr10	93240896	93240956	74190[gene=ENSMUSG00000020015][PH=11][PH0=1.10][P=5.5e-04]	11	+	4	ENSMUSG00000020015	Cdk17	3'UTR	protein_coding	KNOWN	NA	NA	no
chr10	93167986	93168046	70621[gene=ENSMUSG00000020015][PH=11][PH0=1.10][P=5.5e-04]	11	+	3	ENSMUSG00000020015	Cdk17	intron	protein_coding	KNOWN	NA	NA	yes
chr10	93233074	93233134	73602[gene=ENSMUSG00000020015][PH=17][PH0=1.10][P=1.8e-10]	17	+	4	ENSMUSG00000020015	Cdk17	intron	protein_coding	KNOWN	NA	NA	yes
chr10	93583391	93583451	58540[gene=ENSMUSG00000020018][PH=14][PH0=0.13][P=1.0e-100]	14	-	4	ENSMUSG00000020018	Snrpf	3'UTR	protein_coding	KNOWN	NA	NA	yes
chr10	94721739	94721799	75523[gene=ENSMUSG00000020024][PH=9][PH0=0.18][P=9.2e-09]	9	+	4	ENSMUSG00000020024	Ccdc41	intron	protein_coding	KNOWN	NA	NA	yes
chr10	94790287	94790347	76168[gene=ENSMUSG00000020024][PH=8][PH0=0.18][P=4.2e-07]	8	+	3	ENSMUSG00000020024	Ccdc41	3'UTR	protein_coding	KNOWN	NA	NA	yes
chr10	95412015	95412075	59385[gene=ENSMUSG00000020027][PH=5][PH0=0.02][P=1.6e-07]	5	-	3	ENSMUSG00000020027	Socs2	3'UTR|intron	protein_coding	KNOWN	NA	NA	no
chr10	85132189	85132249	54249[gene=ENSMUSG00000020038][PH=17][PH0=0.10][P=1.8e-13]	17	-	4	ENSMUSG00000020038	Cry1	3'UTR	protein_coding	KNOWN	NA	NA	yes
chr10	86693388	86693448	55143[gene=ENSMUSG00000020048][PH=8][PH0=0.52][P=3.9e-04]	8	-	2	ENSMUSG00000020048	Hsp90b1	CDS	protein_coding	KNOWN	NA	NA	no
chr10	86696755	86696815	55354[gene=ENSMUSG00000020048][PH=14][PH0=0.52][P=6.5e-12]	14	-	4	ENSMUSG00000020048	Hsp90b1	CDS|intron	protein_coding	KNOWN	NA	NA	yes
chr10	86691068	86691128	55013[gene=ENSMUSG00000020048][PH=9][PH0=0.52][P=2.6e-05]	9	-	4	ENSMUSG00000020048	Hsp90b1	3'UTR	protein_coding	KNOWN	NA	NA	yes
chr10	86692213	86692273	55081[gene=ENSMUSG00000020048][PH=7][PH0=0.52][P=5.2e-03]	7	-	2	ENSMUSG00000020048	Hsp90b1	CDS|intron	protein_coding	KNOWN	NA	NA	no
chr10	86693950	86694010	55183[gene=ENSMUSG00000020048][PH=7][PH0=0.52][P=5.2e-03]	7	-	3	ENSMUSG00000020048	Hsp90b1	CDS	protein_coding	KNOWN	NA	NA	no
chr10	86695665	86695725	55292[gene=ENSMUSG00000020048][PH=16][PH0=0.52][P=1.0e-100]	16	-	4	ENSMUSG00000020048	Hsp90b1	CDS	protein_coding	KNOWN	NA	NA	no
chr10	86692165	86692225	55074[gene=ENSMUSG00000020048][PH=7][PH0=0.52][P=5.2e-03]	7	-	3	ENSMUSG00000020048	Hsp90b1	CDS	protein_coding	KNOWN	NA	NA	no
chr10	86694002	86694062	55195[gene=ENSMUSG00000020048][PH=7][PH0=0.52][P=5.2e-03]	7	-	3	ENSMUSG00000020048	Hsp90b1	CDS	protein_coding	KNOWN	NA	NA	yes
chr10	86701988	86702048	55476[gene=ENSMUSG00000020048][PH=8][PH0=0.52][P=3.9e-04]	8	-	3	ENSMUSG00000020048	Hsp90b1	CDS	protein_coding	KNOWN	NA	NA	yes
chr10	86694373	86694433	55220[gene=ENSMUSG00000020048][PH=8][PH0=0.52][P=3.9e-04]	8	-	3	ENSMUSG00000020048	Hsp90b1	CDS	protein_coding	KNOWN	NA	NA	no
chr10	86692402	86692462	55101[gene=ENSMUSG00000020048][PH=9][PH0=0.52][P=2.6e-05]	9	-	2	ENSMUSG00000020048	Hsp90b1	CDS|intron	protein_coding	KNOWN	NA	NA	yes
chr10	86694489	86694549	55244[gene=ENSMUSG00000020048][PH=10][PH0=0.52][P=1.5e-06]	10	-	3	ENSMUSG00000020048	Hsp90b1	CDS	protein_coding	KNOWN	NA	NA	no
chr10	63248078	63248138	46918[gene=ENSMUSG00000020064][PH=5][PH0=0.16][P=7.3e-03]	5	+	2	ENSMUSG00000020064	Herc4	intron	protein_coding	KNOWN	NA	NA	no
chr10	62765569	62765629	39931[gene=ENSMUSG00000020074][PH=69][PH0=0.21][P=1.0e-100]	69	-	4	ENSMUSG00000020074	Ccar1	intron	protein_coding	KNOWN	NA	NA	yes
chr10	62580354	62580414	38798[gene=ENSMUSG00000020075][PH=10][PH0=0.46][P=5.4e-07]	10	-	3	ENSMUSG00000020075	Ddx21	3'UTR	protein_coding	KNOWN	NA	NA	yes
chr10	62581477	62581537	38916[gene=ENSMUSG00000020075][PH=8][PH0=0.46][P=1.8e-04]	8	-	4	ENSMUSG00000020075	Ddx21	3'UTR	protein_coding	KNOWN	NA	NA	yes
chr10	62582102	62582162	38952[gene=ENSMUSG00000020075][PH=10][PH0=0.46][P=5.4e-07]	10	-	3	ENSMUSG00000020075	Ddx21	3'UTR	protein_coding	KNOWN	NA	NA	yes
chr10	62580241	62580301	38765[gene=ENSMUSG00000020075][PH=15][PH0=0.46][P=1.0e-100]	15	-	4	ENSMUSG00000020075	Ddx21	3'UTR	protein_coding	KNOWN	NA	NA	yes
chr10	62580455	62580515	38826[gene=ENSMUSG00000020075][PH=19][PH0=0.46][P=1.0e-100]	19	-	4	ENSMUSG00000020075	Ddx21	3'UTR	protein_coding	KNOWN	NA	NA	yes
chr10	62587476	62587536	39072[gene=ENSMUSG00000020075][PH=7][PH0=0.46][P=2.8e-03]	7	-	3	ENSMUSG00000020075	Ddx21	CDS	protein_coding	KNOWN	NA	NA	yes
chr10	62648777	62648837	39679[gene=ENSMUSG00000020076][PH=5][PH0=0.13][P=1.5e-03]	5	-	3	ENSMUSG00000020076	Ddx50	intron	protein_coding	KNOWN	NA	NA	no
chr10	62646012	62646072	39635[gene=ENSMUSG00000020076][PH=10][PH0=0.13][P=3.5e-12]	10	-	3	ENSMUSG00000020076	Ddx50	intron	protein_coding	KNOWN	NA	NA	yes
chr10	62499033	62499093	37868[gene=ENSMUSG00000020077][PH=12][PH0=1.61][P=1.4e-03]	12	-	2	ENSMUSG00000020077	Srgn	intron	protein_coding	KNOWN	NA	NA	yes
chr10	62497799	62497859	37767[gene=ENSMUSG00000020077][PH=43][PH0=1.61][P=1.0e-100]	43	-	4	ENSMUSG00000020077	Srgn	CDS	protein_coding	KNOWN	NA	NA	yes
chr10	62503560	62503620	38219[gene=ENSMUSG00000020077][PH=11][PH0=1.61][P=9.7e-03]	11	-	4	ENSMUSG00000020077	Srgn	intron	protein_coding	KNOWN	NA	NA	no
chr10	62494561	62494621	37197[gene=ENSMUSG00000020077][PH=161][PH0=1.61][P=1.0e-100]	161	-	4	ENSMUSG00000020077	Srgn	3'UTR	protein_coding	KNOWN	NA	NA	yes
chr10	62493840	62493900	36974[gene=ENSMUSG00000020077][PH=17][PH0=1.61][P=3.1e-08]	17	-	4	ENSMUSG00000020077	Srgn	3'UTR	protein_coding	KNOWN	NA	NA	yes
chr10	62503799	62503859	38250[gene=ENSMUSG00000020077][PH=13][PH0=1.61][P=2.0e-04]	13	-	3	ENSMUSG00000020077	Srgn	intron	protein_coding	KNOWN	NA	NA	no
chr10	62497396	62497456	37688[gene=ENSMUSG00000020077][PH=11][PH0=1.61][P=9.7e-03]	11	-	2	ENSMUSG00000020077	Srgn	intron	protein_coding	KNOWN	NA	NA	yes
chr10	62495045	62495105	37517[gene=ENSMUSG00000020077][PH=35][PH0=1.61][P=1.0e-100]	35	-	4	ENSMUSG00000020077	Srgn	CDS	protein_coding	KNOWN	NA	NA	yes
chr10	62507324	62507384	38649[gene=ENSMUSG00000020077][PH=17][PH0=1.61][P=3.1e-08]	17	-	3	ENSMUSG00000020077	Srgn	intron	protein_coding	KNOWN	NA	NA	yes
chr10	62500525	62500585	37965[gene=ENSMUSG00000020077][PH=15][PH0=1.61][P=2.8e-06]	15	-	3	ENSMUSG00000020077	Srgn	intron	protein_coding	KNOWN	NA	NA	yes
chr10	62499004	62499064	37863[gene=ENSMUSG00000020077][PH=11][PH0=1.61][P=9.7e-03]	11	-	3	ENSMUSG00000020077	Srgn	intron	protein_coding	KNOWN	NA	NA	no
chr10	61700554	61700614	46508[gene=ENSMUSG00000020087][PH=4][PH0=0.03][P=9.4e-05]	4	+	2	ENSMUSG00000020087	Tysnd1	downstream 10K|intron	protein_coding	KNOWN	NA	NA	no
chr10	61692074	61692134	46448[gene=ENSMUSG00000020088][PH=5][PH0=0.18][P=3.3e-03]	5	+	2	ENSMUSG00000020088	Sar1a	3'UTR	protein_coding	KNOWN	NA	NA	no
chr10	61100266	61100326	35744[gene=ENSMUSG00000020097][PH=6][PH0=0.10][P=9.2e-06]	6	-	3	ENSMUSG00000020097	Sgpl1	3'UTR	protein_coding	KNOWN	NA	NA	yes
chr10	60372475	60372535	45897[gene=ENSMUSG00000020101][PH=20][PH0=0.55][P=1.0e-100]	20	+	4	ENSMUSG00000020101	4632428N05Rik	3'UTR	protein_coding	KNOWN	NA	NA	yes
chr10	60372396	60372456	45874[gene=ENSMUSG00000020101][PH=11][PH0=0.55][P=1.9e-07]	11	+	3	ENSMUSG00000020101	4632428N05Rik	3'UTR	protein_coding	KNOWN	NA	NA	yes
chr10	60369786	60369846	45748[gene=ENSMUSG00000020101][PH=10][PH0=0.55][P=3.4e-06]	10	+	4	ENSMUSG00000020101	4632428N05Rik	3'UTR	protein_coding	KNOWN	NA	NA	yes
chr10	60371219	60371279	45797[gene=ENSMUSG00000020101][PH=8][PH0=0.55][P=8.0e-04]	8	+	3	ENSMUSG00000020101	4632428N05Rik	3'UTR	protein_coding	KNOWN	NA	NA	yes
chr10	59950178	59950238	35290[gene=ENSMUSG00000020108][PH=10][PH0=0.06][P=1.0e-100]	10	-	2	ENSMUSG00000020108	Ddit4	3'UTR	protein_coding	KNOWN	NA	NA	yes
chr10	59899016	59899076	44934[gene=ENSMUSG00000020109][PH=4][PH0=0.04][P=3.3e-04]	4	+	3	ENSMUSG00000020109	Dnajb12	3'UTR	protein_coding	KNOWN	NA	NA	no
chr11	17203726	17203786	9051[gene=ENSMUSG00000020116][PH=6][PH0=0.13][P=1.3e-05]	6	-	4	ENSMUSG00000020116	Pno1	3'UTR	protein_coding	KNOWN	NA	NA	yes
chr11	17203259	17203319	9021[gene=ENSMUSG00000020116][PH=5][PH0=0.13][P=5.3e-04]	5	-	3	ENSMUSG00000020116	Pno1	3'UTR	protein_coding	KNOWN	NA	NA	no
chr11	16971716	16971776	8017[gene=ENSMUSG00000020120][PH=8][PH0=0.24][P=3.9e-06]	8	-	2	ENSMUSG00000020120	Plek	3'UTR	protein_coding	KNOWN	NA	NA	no
chr11	16972558	16972618	8114[gene=ENSMUSG00000020120][PH=12][PH0=0.24][P=1.8e-12]	12	-	3	ENSMUSG00000020120	Plek	3'UTR	protein_coding	KNOWN	NA	NA	no
chr11	16973376	16973436	8197[gene=ENSMUSG00000020120][PH=15][PH0=0.24][P=1.0e-100]	15	-	4	ENSMUSG00000020120	Plek	3'UTR	protein_coding	KNOWN	NA	NA	yes
chr11	16972044	16972104	8055[gene=ENSMUSG00000020120][PH=14][PH0=0.24][P=1.0e-100]	14	-	4	ENSMUSG00000020120	Plek	3'UTR	protein_coding	KNOWN	NA	NA	yes
chr11	16995257	16995317	8748[gene=ENSMUSG00000020120][PH=11][PH0=0.24][P=7.7e-11]	11	-	3	ENSMUSG00000020120	Plek	CDS	protein_coding	KNOWN	NA	NA	yes
chr11	16973934	16973994	8270[gene=ENSMUSG00000020120][PH=17][PH0=0.24][P=1.0e-100]	17	-	4	ENSMUSG00000020120	Plek	3'UTR	protein_coding	KNOWN	NA	NA	yes
chr11	16973890	16973950	8255[gene=ENSMUSG00000020120][PH=6][PH0=0.24][P=2.8e-03]	6	-	3	ENSMUSG00000020120	Plek	3'UTR	protein_coding	KNOWN	NA	NA	no
chr11	16973735	16973795	8233[gene=ENSMUSG00000020120][PH=9][PH0=0.24][P=1.2e-07]	9	-	3	ENSMUSG00000020120	Plek	3'UTR	protein_coding	KNOWN	NA	NA	no
chr11	16972416	16972476	8094[gene=ENSMUSG00000020120][PH=8][PH0=0.24][P=3.9e-06]	8	-	4	ENSMUSG00000020120	Plek	3'UTR	protein_coding	KNOWN	NA	NA	no
chr11	16977004	16977064	8342[gene=ENSMUSG00000020120][PH=6][PH0=0.24][P=2.8e-03]	6	-	4	ENSMUSG00000020120	Plek	intron	protein_coding	KNOWN	NA	NA	no
chr11	21288958	21289018	19894[gene=ENSMUSG00000020128][PH=9][PH0=0.76][P=2.2e-03]	9	+	3	ENSMUSG00000020128	Vps54	intron	protein_coding	KNOWN	NA	NA	no
chr11	21255308	21255368	18502[gene=ENSMUSG00000020128][PH=10][PH0=0.76][P=1.9e-04]	10	+	2	ENSMUSG00000020128	Vps54	intron	protein_coding	KNOWN	NA	NA	yes
chr11	21321041	21321101	20928[gene=ENSMUSG00000020128][PH=9][PH0=0.76][P=2.2e-03]	9	+	3	ENSMUSG00000020128	Vps54	3'UTR	protein_coding	KNOWN	NA	NA	no
chr10	115290399	115290459	62277[gene=ENSMUSG00000020132][PH=14][PH0=0.18][P=1.0e-100]	14	-	4	ENSMUSG00000020132	Rab21	3'UTR	protein_coding	KNOWN	NA	NA	yes
chr10	115290273	115290333	62258[gene=ENSMUSG00000020132][PH=9][PH0=0.18][P=3.6e-09]	9	-	4	ENSMUSG00000020132	Rab21	3'UTR	protein_coding	KNOWN	NA	NA	no
chr10	115290159	115290219	62234[gene=ENSMUSG00000020132][PH=11][PH0=0.18][P=1.2e-12]	11	-	4	ENSMUSG00000020132	Rab21	3'UTR	protein_coding	KNOWN	NA	NA	yes
chr11	21095727	21095787	13035[gene=ENSMUSG00000020134][PH=17][PH0=1.85][P=4.2e-07]	17	+	3	ENSMUSG00000020134	Peli1	intron	protein_coding	KNOWN	NA	NA	yes
chr11	21149245	21149305	17135[gene=ENSMUSG00000020134][PH=12][PH0=1.85][P=9.6e-03]	12	+	4	ENSMUSG00000020134	Peli1	3'UTR|intron	protein_coding	KNOWN	NA	NA	yes
chr11	21095238	21095298	12935[gene=ENSMUSG00000020134][PH=13][PH0=1.85][P=1.5e-03]	13	+	3	ENSMUSG00000020134	Peli1	intron	protein_coding	KNOWN	NA	NA	no
chr11	21149263	21149323	17139[gene=ENSMUSG00000020134][PH=15][PH0=1.85][P=2.9e-05]	15	+	4	ENSMUSG00000020134	Peli1	3'UTR|intron	protein_coding	KNOWN	NA	NA	yes
chr11	21092567	21092627	12593[gene=ENSMUSG00000020134][PH=14][PH0=1.85][P=2.2e-04]	14	+	3	ENSMUSG00000020134	Peli1	intron	protein_coding	KNOWN	NA	NA	no
chr11	21096351	21096411	13127[gene=ENSMUSG00000020134][PH=14][PH0=1.85][P=2.2e-04]	14	+	3	ENSMUSG00000020134	Peli1	intron	protein_coding	KNOWN	NA	NA	yes
chr11	21149116	21149176	17087[gene=ENSMUSG00000020134][PH=12][PH0=1.85][P=9.6e-03]	12	+	4	ENSMUSG00000020134	Peli1	3'UTR|intron	protein_coding	KNOWN	NA	NA	yes
chr11	21092392	21092452	12557[gene=ENSMUSG00000020134][PH=14][PH0=1.85][P=2.2e-04]	14	+	2	ENSMUSG00000020134	Peli1	intron	protein_coding	KNOWN	NA	NA	yes
chr11	21148910	21148970	17024[gene=ENSMUSG00000020134][PH=62][PH0=1.85][P=1.0e-100]	62	+	4	ENSMUSG00000020134	Peli1	3'UTR|intron	protein_coding	KNOWN	NA	NA	yes
chr11	21149207	21149267	17118[gene=ENSMUSG00000020134][PH=14][PH0=1.85][P=2.2e-04]	14	+	4	ENSMUSG00000020134	Peli1	3'UTR|intron	protein_coding	KNOWN	NA	NA	yes
chr11	21116537	21116597	15127[gene=ENSMUSG00000020134][PH=14][PH0=1.85][P=2.2e-04]	14	+	4	ENSMUSG00000020134	Peli1	intron	protein_coding	KNOWN	NA	NA	yes
chr11	21149521	21149581	17204[gene=ENSMUSG00000020134][PH=13][PH0=1.85][P=1.5e-03]	13	+	2	ENSMUSG00000020134	Peli1	3'UTR	protein_coding	KNOWN	NA	NA	no
chr11	21103228	21103288	13866[gene=ENSMUSG00000020134][PH=15][PH0=1.85][P=2.9e-05]	15	+	3	ENSMUSG00000020134	Peli1	intron	protein_coding	KNOWN	NA	NA	no
chr11	21110499	21110559	14552[gene=ENSMUSG00000020134][PH=16][PH0=1.85][P=3.6e-06]	16	+	3	ENSMUSG00000020134	Peli1	intron	protein_coding	KNOWN	NA	NA	yes
chr11	21148635	21148695	16921[gene=ENSMUSG00000020134][PH=122][PH0=1.85][P=1.0e-100]	122	+	4	ENSMUSG00000020134	Peli1	3'UTR|intron	protein_coding	KNOWN	NA	NA	yes
chr11	21103728	21103788	13927[gene=ENSMUSG00000020134][PH=12][PH0=1.85][P=9.6e-03]	12	+	3	ENSMUSG00000020134	Peli1	intron	protein_coding	KNOWN	NA	NA	no
chr11	21150269	21150329	17400[gene=ENSMUSG00000020134][PH=185][PH0=1.85][P=1.0e-100]	185	+	4	ENSMUSG00000020134	Peli1	3'UTR	protein_coding	KNOWN	NA	NA	yes
chr11	21149949	21150009	17259[gene=ENSMUSG00000020134][PH=64][PH0=1.85][P=1.0e-100]	64	+	4	ENSMUSG00000020134	Peli1	3'UTR	protein_coding	KNOWN	NA	NA	yes
chr11	21097878	21097938	13277[gene=ENSMUSG00000020134][PH=12][PH0=1.85][P=9.6e-03]	12	+	3	ENSMUSG00000020134	Peli1	intron	protein_coding	KNOWN	NA	NA	no
chr11	21150049	21150109	17311[gene=ENSMUSG00000020134][PH=29][PH0=1.85][P=1.0e-100]	29	+	3	ENSMUSG00000020134	Peli1	3'UTR	protein_coding	KNOWN	NA	NA	yes
chr11	34400630	34400690	18826[gene=ENSMUSG00000020143][PH=21][PH0=0.22][P=1.0e-100]	21	-	3	ENSMUSG00000020143	Dock2	intron	protein_coding	KNOWN	NA	NA	yes
chr11	34682201	34682261	21005[gene=ENSMUSG00000020143][PH=17][PH0=0.22][P=1.0e-100]	17	-	2	ENSMUSG00000020143	Dock2	intron	protein_coding	KNOWN	NA	NA	yes
chr11	34544882	34544942	20823[gene=ENSMUSG00000020143][PH=7][PH0=0.22][P=3.6e-04]	7	-	4	ENSMUSG00000020143	Dock2	intron	protein_coding	KNOWN	NA	NA	yes
chr11	34681697	34681757	20845[gene=ENSMUSG00000020143][PH=9][PH0=0.22][P=3.0e-07]	9	-	2	ENSMUSG00000020143	Dock2	intron	protein_coding	KNOWN	NA	NA	no
chr11	34681892	34681952	20907[gene=ENSMUSG00000020143][PH=26][PH0=0.22][P=1.0e-100]	26	-	2	ENSMUSG00000020143	Dock2	intron	protein_coding	KNOWN	NA	NA	yes
chr11	34368929	34368989	17966[gene=ENSMUSG00000020143][PH=6][PH0=0.22][P=9.7e-03]	6	-	2	ENSMUSG00000020143	Dock2	intron	protein_coding	KNOWN	NA	NA	no
chr11	34544820	34544880	20795[gene=ENSMUSG00000020143][PH=71][PH0=0.22][P=1.0e-100]	71	-	3	ENSMUSG00000020143	Dock2	intron	protein_coding	KNOWN	NA	NA	yes
chr11	34374934	34374994	18131[gene=ENSMUSG00000020143][PH=6][PH0=0.22][P=9.7e-03]	6	-	2	ENSMUSG00000020143	Dock2	intron	protein_coding	KNOWN	NA	NA	no
chr11	34424081	34424141	19514[gene=ENSMUSG00000020143][PH=6][PH0=0.22][P=9.7e-03]	6	-	3	ENSMUSG00000020143	Dock2	intron	protein_coding	KNOWN	NA	NA	no
chr11	34683311	34683371	21101[gene=ENSMUSG00000020143][PH=11][PH0=0.22][P=1.6e-10]	11	-	2	ENSMUSG00000020143	Dock2	intron	protein_coding	KNOWN	NA	NA	yes
chr11	34543353	34543413	20681[gene=ENSMUSG00000020143][PH=8][PH0=0.22][P=1.1e-05]	8	-	2	ENSMUSG00000020143	Dock2	intron	protein_coding	KNOWN	NA	NA	no
chr11	34682046	34682106	20960[gene=ENSMUSG00000020143][PH=14][PH0=0.22][P=1.0e-100]	14	-	3	ENSMUSG00000020143	Dock2	intron	protein_coding	KNOWN	NA	NA	yes
chr11	34544292	34544352	20727[gene=ENSMUSG00000020143][PH=6][PH0=0.22][P=9.7e-03]	6	-	3	ENSMUSG00000020143	Dock2	intron	protein_coding	KNOWN	NA	NA	yes
chr11	34681754	34681814	20859[gene=ENSMUSG00000020143][PH=7][PH0=0.22][P=3.6e-04]	7	-	2	ENSMUSG00000020143	Dock2	intron	protein_coding	KNOWN	NA	NA	no
chr11	34386226	34386286	18436[gene=ENSMUSG00000020143][PH=6][PH0=0.22][P=9.7e-03]	6	-	2	ENSMUSG00000020143	Dock2	intron	protein_coding	KNOWN	NA	NA	no
chr11	34544723	34544783	20758[gene=ENSMUSG00000020143][PH=6][PH0=0.22][P=9.7e-03]	6	-	2	ENSMUSG00000020143	Dock2	intron	protein_coding	KNOWN	NA	NA	yes
chr11	34227188	34227248	16187[gene=ENSMUSG00000020143][PH=8][PH0=0.22][P=1.1e-05]	8	-	3	ENSMUSG00000020143	Dock2	3'UTR	protein_coding	KNOWN	NA	NA	no
chr11	34436629	34436689	19922[gene=ENSMUSG00000020143][PH=6][PH0=0.22][P=9.7e-03]	6	-	4	ENSMUSG00000020143	Dock2	downstream 10K|intron	protein_coding	KNOWN	NA	NA	no
chr11	34543925	34543985	20710[gene=ENSMUSG00000020143][PH=6][PH0=0.22][P=9.7e-03]	6	-	3	ENSMUSG00000020143	Dock2	intron	protein_coding	KNOWN	NA	NA	no
chr11	34682374	34682434	21040[gene=ENSMUSG00000020143][PH=8][PH0=0.22][P=1.1e-05]	8	-	3	ENSMUSG00000020143	Dock2	intron	protein_coding	KNOWN	NA	NA	yes
chr11	34682107	34682167	20981[gene=ENSMUSG00000020143][PH=18][PH0=0.22][P=1.0e-100]	18	-	3	ENSMUSG00000020143	Dock2	intron	protein_coding	KNOWN	NA	NA	yes
chr11	34686938	34686998	21222[gene=ENSMUSG00000020143][PH=6][PH0=0.22][P=9.7e-03]	6	-	3	ENSMUSG00000020143	Dock2	intron	protein_coding	KNOWN	NA	NA	no
chr11	34408215	34408275	19028[gene=ENSMUSG00000020143][PH=6][PH0=0.22][P=9.7e-03]	6	-	2	ENSMUSG00000020143	Dock2	intron	protein_coding	KNOWN	NA	NA	yes
chr11	34408458	34408518	19044[gene=ENSMUSG00000020143][PH=6][PH0=0.22][P=9.7e-03]	6	-	3	ENSMUSG00000020143	Dock2	intron	protein_coding	KNOWN	NA	NA	no
chr11	34682544	34682604	21056[gene=ENSMUSG00000020143][PH=8][PH0=0.22][P=1.1e-05]	8	-	2	ENSMUSG00000020143	Dock2	intron	protein_coding	KNOWN	NA	NA	yes
chr11	34682333	34682393	21031[gene=ENSMUSG00000020143][PH=8][PH0=0.22][P=1.1e-05]	8	-	3	ENSMUSG00000020143	Dock2	intron	protein_coding	KNOWN	NA	NA	yes
chr11	20215621	20215681	11750[gene=ENSMUSG00000020149][PH=28][PH0=0.31][P=1.0e-100]	28	+	4	ENSMUSG00000020149	Rab1	CDS	protein_coding	KNOWN	NA	NA	yes
chr11	20225382	20225442	11983[gene=ENSMUSG00000020149][PH=6][PH0=0.31][P=4.9e-03]	6	+	3	ENSMUSG00000020149	Rab1	3'UTR	protein_coding	KNOWN	NA	NA	yes
chr11	20225144	20225204	11932[gene=ENSMUSG00000020149][PH=15][PH0=0.31][P=1.0e-100]	15	+	3	ENSMUSG00000020149	Rab1	3'UTR	protein_coding	KNOWN	NA	NA	yes
chr11	20225409	20225469	11989[gene=ENSMUSG00000020149][PH=7][PH0=0.31][P=2.6e-04]	7	+	3	ENSMUSG00000020149	Rab1	3'UTR	protein_coding	KNOWN	NA	NA	no
chr11	20062441	20062501	9234[gene=ENSMUSG00000020152][PH=9][PH0=0.27][P=2.5e-07]	9	-	4	ENSMUSG00000020152	Actr2	3'UTR	protein_coding	KNOWN	NA	NA	yes
chr11	20062305	20062365	9203[gene=ENSMUSG00000020152][PH=10][PH0=0.27][P=7.7e-09]	10	-	3	ENSMUSG00000020152	Actr2	3'UTR	protein_coding	KNOWN	NA	NA	yes
chr11	20062650	20062710	9264[gene=ENSMUSG00000020152][PH=23][PH0=0.27][P=1.0e-100]	23	-	4	ENSMUSG00000020152	Actr2	3'UTR	protein_coding	KNOWN	NA	NA	yes
chr11	20064285	20064345	9345[gene=ENSMUSG00000020152][PH=11][PH0=0.27][P=2.1e-10]	11	-	3	ENSMUSG00000020152	Actr2	3'UTR	protein_coding	KNOWN	NA	NA	yes
chr11	20063190	20063250	9296[gene=ENSMUSG00000020152][PH=13][PH0=0.27][P=1.1e-16]	13	-	4	ENSMUSG00000020152	Actr2	3'UTR	protein_coding	KNOWN	NA	NA	yes
chr11	20062365	20062425	9217[gene=ENSMUSG00000020152][PH=10][PH0=0.27][P=7.7e-09]	10	-	2	ENSMUSG00000020152	Actr2	3'UTR	protein_coding	KNOWN	NA	NA	yes
chr10	80249215	80249275	55554[gene=ENSMUSG00000020156][PH=24][PH0=0.07][P=1.0e-100]	24	+	4	ENSMUSG00000020153	Ndufs7	downstream 10K|intron	protein_coding	KNOWN	NA	NA	yes
chr10	116485925	116485985	62712[gene=ENSMUSG00000020166][PH=6][PH0=0.26][P=5.3e-03]	6	-	3	ENSMUSG00000020166	Cnot2	3'UTR	protein_coding	KNOWN	NA	NA	yes
chr10	80409686	80409746	52866[gene=ENSMUSG00000020167][PH=4][PH0=0.05][P=6.7e-04]	4	-	2	ENSMUSG00000020167	Tcf3	3'UTR	protein_coding	KNOWN	NA	NA	no
chr10	75333952	75334012	52572[gene=ENSMUSG00000020178][PH=6][PH0=0.35][P=7.2e-03]	6	+	3	ENSMUSG00000020178	Adora2a	3'UTR	protein_coding	KNOWN	NA	NA	yes
chr10	75334729	75334789	52607[gene=ENSMUSG00000020178][PH=11][PH0=0.35][P=1.3e-09]	11	+	2	ENSMUSG00000020178	Adora2a	3'UTR	protein_coding	KNOWN	NA	NA	no
chr10	75321242	75321302	52272[gene=ENSMUSG00000033444][PH=5][PH0=0.14][P=5.5e-03]	5	+	2	ENSMUSG00000020178	Adora2a	downstream 10K|intron	protein_coding	KNOWN	NA	NA	no
chr10	75334333	75334393	52590[gene=ENSMUSG00000020178][PH=7][PH0=0.35][P=4.3e-04]	7	+	4	ENSMUSG00000020178	Adora2a	3'UTR	protein_coding	KNOWN	NA	NA	no
chr10	75519334	75519394	52672[gene=ENSMUSG00000020180][PH=6][PH0=0.16][P=8.6e-05]	6	+	3	ENSMUSG00000020180	Snrpd3	CDS	protein_coding	KNOWN	NA	NA	no
chr10	75535405	75535465	52848[gene=ENSMUSG00000020180][PH=16][PH0=0.16][P=1.6e-13]	16	+	4	ENSMUSG00000020180	Snrpd3	3'UTR	protein_coding	KNOWN	NA	NA	yes
chr10	117689922	117689982	66344[gene=ENSMUSG00000020184][PH=22][PH0=0.51][P=1.0e-100]	22	-	4	ENSMUSG00000020184	Mdm2	3'UTR	protein_coding	KNOWN	NA	NA	yes
chr10	117690092	117690152	66390[gene=ENSMUSG00000020184][PH=15][PH0=0.51][P=2.7e-13]	15	-	4	ENSMUSG00000020184	Mdm2	3'UTR	protein_coding	KNOWN	NA	NA	yes
chr10	117689728	117689788	66280[gene=ENSMUSG00000020184][PH=40][PH0=0.51][P=1.0e-100]	40	-	4	ENSMUSG00000020184	Mdm2	3'UTR	protein_coding	KNOWN	NA	NA	yes
chr10	117702260	117702320	66577[gene=ENSMUSG00000020184][PH=11][PH0=0.51][P=7.8e-08]	11	-	4	ENSMUSG00000020184	Mdm2	CDS	protein_coding	KNOWN	NA	NA	yes
chr10	117688883	117688943	66180[gene=ENSMUSG00000020184][PH=40][PH0=0.51][P=1.0e-100]	40	-	4	ENSMUSG00000020184	Mdm2	3'UTR	protein_coding	KNOWN	NA	NA	yes
chr10	111296527	111296587	87880[gene=ENSMUSG00000020189][PH=7][PH0=0.33][P=1.5e-03]	7	+	3	ENSMUSG00000020189	Osbpl8	3'UTR	protein_coding	KNOWN	NA	NA	yes
chr10	111294418	111294478	87730[gene=ENSMUSG00000020189][PH=7][PH0=0.33][P=1.5e-03]	7	+	2	ENSMUSG00000020189	Osbpl8	3'UTR	protein_coding	KNOWN	NA	NA	yes
chr10	111293878	111293938	87653[gene=ENSMUSG00000020189][PH=13][PH0=0.33][P=3.6e-12]	13	+	4	ENSMUSG00000020189	Osbpl8	3'UTR	protein_coding	KNOWN	NA	NA	yes
chr10	111294853	111294913	87769[gene=ENSMUSG00000020189][PH=14][PH0=0.33][P=4.0e-13]	14	+	4	ENSMUSG00000020189	Osbpl8	3'UTR	protein_coding	KNOWN	NA	NA	yes
chr10	111293198	111293258	87601[gene=ENSMUSG00000020189][PH=9][PH0=0.33][P=3.1e-06]	9	+	4	ENSMUSG00000020189	Osbpl8	3'UTR|CDS	protein_coding	KNOWN	NA	NA	no
chr10	111296838	111296898	87907[gene=ENSMUSG00000020189][PH=7][PH0=0.33][P=1.5e-03]	7	+	3	ENSMUSG00000020189	Osbpl8	3'UTR	protein_coding	KNOWN	NA	NA	no
chr10	111296610	111296670	87894[gene=ENSMUSG00000020189][PH=7][PH0=0.33][P=1.5e-03]	7	+	4	ENSMUSG00000020189	Osbpl8	3'UTR	protein_coding	KNOWN	NA	NA	yes
chr10	111286189	111286249	87487[gene=ENSMUSG00000020189][PH=7][PH0=0.33][P=1.5e-03]	7	+	3	ENSMUSG00000020189	Osbpl8	CDS	protein_coding	KNOWN	NA	NA	no
chr10	111294352	111294412	87707[gene=ENSMUSG00000020189][PH=23][PH0=0.33][P=4.0e-13]	23	+	4	ENSMUSG00000020189	Osbpl8	3'UTR	protein_coding	KNOWN	NA	NA	yes
chr10	80666860	80666920	53142[gene=ENSMUSG00000020190][PH=7][PH0=0.07][P=5.9e-09]	7	-	2	ENSMUSG00000020190	Mknk2	3'UTR	protein_coding	KNOWN	NA	NA	yes
chr10	80665883	80665943	53123[gene=ENSMUSG00000020190][PH=4][PH0=0.07][P=1.8e-03]	4	-	3	ENSMUSG00000020190	Mknk2	3'UTR	protein_coding	KNOWN	NA	NA	yes
chr10	75761214	75761274	48389[gene=ENSMUSG00000001666][PH=4][PH0=0.10][P=5.1e-03]	4	-	3	ENSMUSG00000020196	Cabin1	downstream 10K|intron	protein_coding	KNOWN	NA	NA	no
chr10	111508583	111508643	88732[gene=ENSMUSG00000020205][PH=10][PH0=0.64][P=5.2e-06]	10	+	3	ENSMUSG00000020205	Phlda1	3'UTR	protein_coding	KNOWN	NA	NA	no
chr10	111508463	111508523	88707[gene=ENSMUSG00000020205][PH=16][PH0=0.64][P=1.4e-13]	16	+	4	ENSMUSG00000020205	Phlda1	3'UTR	protein_coding	KNOWN	NA	NA	yes
chr10	111508348	111508408	88645[gene=ENSMUSG00000020205][PH=67][PH0=0.64][P=3.5e-14]	67	+	4	ENSMUSG00000020205	Phlda1	3'UTR	protein_coding	KNOWN	NA	NA	yes
chr10	120224828	120224888	93386[gene=ENSMUSG00000020225][PH=4][PH0=0.05][P=9.5e-04]	4	+	4	ENSMUSG00000020225	Tmbim4	3'UTR	protein_coding	KNOWN	NA	NA	no
chr10	82739316	82739376	58625[gene=ENSMUSG00000020246][PH=4][PH0=0.05][P=1.2e-03]	4	+	2	ENSMUSG00000020246	Hcfc2	3'UTR|intron	protein_coding	KNOWN	NA	NA	yes
chr10	82750030	82750090	53942[gene=ENSMUSG00000020248][PH=6][PH0=0.12][P=1.6e-05]	6	-	3	ENSMUSG00000020248	Nfyb	3'UTR	protein_coding	KNOWN	NA	NA	yes
chr10	82749843	82749903	53924[gene=ENSMUSG00000020248][PH=5][PH0=0.12][P=6.6e-04]	5	-	4	ENSMUSG00000020248	Nfyb	3'UTR	protein_coding	KNOWN	NA	NA	yes
chr10	82897460	82897520	59056[gene=ENSMUSG00000020250][PH=20][PH0=0.21][P=1.0e-100]	20	+	4	ENSMUSG00000020250	Txnrd1	3'UTR	protein_coding	KNOWN	NA	NA	yes
chr10	82897652	82897712	59103[gene=ENSMUSG00000020250][PH=9][PH0=0.21][P=2.3e-08]	9	+	4	ENSMUSG00000020250	Txnrd1	3'UTR	protein_coding	KNOWN	NA	NA	yes
chr10	82897535	82897595	59079[gene=ENSMUSG00000020250][PH=6][PH0=0.21][P=7.7e-04]	6	+	2	ENSMUSG00000020250	Txnrd1	3'UTR	protein_coding	KNOWN	NA	NA	yes
chr10	82897578	82897638	59088[gene=ENSMUSG00000020250][PH=7][PH0=0.21][P=2.8e-05]	7	+	3	ENSMUSG00000020250	Txnrd1	3'UTR	protein_coding	KNOWN	NA	NA	no
chr10	82896977	82897037	59009[gene=ENSMUSG00000020250][PH=25][PH0=0.21][P=1.0e-100]	25	+	4	ENSMUSG00000020250	Txnrd1	3'UTR	protein_coding	KNOWN	NA	NA	yes
chr9	106188630	106188690	89725[gene=ENSMUSG00000020257][PH=8][PH0=0.16][P=5.0e-08]	8	+	2	ENSMUSG00000020257	Wdr82	3'UTR	protein_coding	KNOWN	NA	NA	yes
chr9	106178826	106178886	89626[gene=ENSMUSG00000020257][PH=8][PH0=0.16][P=5.0e-08]	8	+	3	ENSMUSG00000020257	Wdr82	intron	protein_coding	KNOWN	NA	NA	yes
chr10	77269517	77269577	53377[gene=ENSMUSG00000020260][PH=24][PH0=0.06][P=5.8e-14]	24	+	4	ENSMUSG00000020260	Pofut2	3'UTR	protein_coding	KNOWN	NA	NA	yes
chr11	54870307	54870367	49727[gene=ENSMUSG00000020267][PH=4][PH0=0.09][P=4.2e-03]	4	+	3	ENSMUSG00000020267	Hint1	3'UTR|CDS	protein_coding	KNOWN	NA	NA	no
chr11	54870453	54870513	49739[gene=ENSMUSG00000020267][PH=5][PH0=0.09][P=1.0e-04]	5	+	3	ENSMUSG00000020267	Hint1	3'UTR	protein_coding	KNOWN	NA	NA	no
chr11	32745196	32745256	29974[gene=ENSMUSG00000020271][PH=14][PH0=0.39][P=6.5e-13]	14	+	4	ENSMUSG00000020271	Fbxw11	3'UTR	protein_coding	KNOWN	NA	NA	yes
chr11	32745869	32745929	30011[gene=ENSMUSG00000020271][PH=8][PH0=0.39][P=2.1e-04]	8	+	4	ENSMUSG00000020271	Fbxw11	3'UTR	protein_coding	KNOWN	NA	NA	no
chr11	32745052	32745112	29951[gene=ENSMUSG00000020271][PH=7][PH0=0.39][P=3.6e-03]	7	+	3	ENSMUSG00000020271	Fbxw11	3'UTR	protein_coding	KNOWN	NA	NA	no
chr11	32746589	32746649	30074[gene=ENSMUSG00000020271][PH=11][PH0=0.39][P=1.7e-08]	11	+	4	ENSMUSG00000020271	Fbxw11	3'UTR	protein_coding	KNOWN	NA	NA	yes
chr11	23863321	23863381	14078[gene=ENSMUSG00000020273][PH=7][PH0=0.12][P=3.9e-07]	7	-	4	ENSMUSG00000020273	Papolg	3'UTR	protein_coding	KNOWN	NA	NA	yes
chr11	23741974	23742034	12802[gene=ENSMUSG00000020275][PH=10][PH0=1.10][P=2.1e-03]	10	-	3	ENSMUSG00000020275	Rel	3'UTR	protein_coding	KNOWN	NA	NA	yes
chr11	23742198	23742258	12866[gene=ENSMUSG00000020275][PH=12][PH0=1.10][P=2.4e-05]	12	-	4	ENSMUSG00000020275	Rel	3'UTR	protein_coding	KNOWN	NA	NA	yes
chr11	23741829	23741889	12767[gene=ENSMUSG00000020275][PH=32][PH0=1.10][P=1.0e-100]	32	-	4	ENSMUSG00000020275	Rel	3'UTR	protein_coding	KNOWN	NA	NA	yes
chr10	78000671	78000731	51060[gene=ENSMUSG00000020277][PH=4][PH0=0.05][P=1.1e-03]	4	-	2	ENSMUSG00000020277	Pfkl	CDS	protein_coding	KNOWN	NA	NA	no
chr11	23490254	23490314	11927[gene=ENSMUSG00000020288][PH=7][PH0=0.07][P=5.4e-09]	7	-	4	ENSMUSG00000020288	Ahsa2	3'UTR|intron	protein_coding	KNOWN	NA	NA	yes
chr11	23286855	23286915	21762[gene=ENSMUSG00000020290][PH=6][PH0=0.22][P=8.8e-04]	6	+	3	ENSMUSG00000020290	Xpo1	CDS	protein_coding	KNOWN	NA	NA	no
chr11	31935467	31935527	27270[gene=ENSMUSG00000020300][PH=10][PH0=0.13][P=5.8e-12]	10	+	4	ENSMUSG00000020300	Cpeb4	3'UTR	protein_coding	KNOWN	NA	NA	yes
chr11	31932266	31932326	27140[gene=ENSMUSG00000020300][PH=9][PH0=0.13][P=4.1e-10]	9	+	3	ENSMUSG00000020300	Cpeb4	3'UTR	protein_coding	KNOWN	NA	NA	no
chr11	31935006	31935066	27237[gene=ENSMUSG00000020300][PH=5][PH0=0.13][P=2.4e-03]	5	+	3	ENSMUSG00000020300	Cpeb4	3'UTR	protein_coding	KNOWN	NA	NA	no
chr11	30099749	30099809	14644[gene=ENSMUSG00000020315][PH=4][PH0=0.04][P=1.6e-03]	4	-	2	ENSMUSG00000020315	Sptbn1	3'UTR	protein_coding	KNOWN	NA	NA	no
chr11	30099703	30099763	14637[gene=ENSMUSG00000020315][PH=4][PH0=0.04][P=1.6e-03]	4	-	3	ENSMUSG00000020315	Sptbn1	3'UTR	protein_coding	KNOWN	NA	NA	no
chr11	30099508	30099568	14620[gene=ENSMUSG00000020315][PH=4][PH0=0.04][P=1.6e-03]	4	-	2	ENSMUSG00000020315	Sptbn1	3'UTR	protein_coding	KNOWN	NA	NA	yes
chr11	30100297	30100357	14682[gene=ENSMUSG00000020315][PH=14][PH0=0.04][P=1.0e-100]	14	-	3	ENSMUSG00000020315	Sptbn1	3'UTR	protein_coding	KNOWN	NA	NA	yes
chr11	21557274	21557334	10940[gene=ENSMUSG00000020321][PH=9][PH0=0.05][P=1.0e-100]	9	-	4	ENSMUSG00000020321	Mdh1	3'UTR	protein_coding	KNOWN	NA	NA	yes
chr11	21557241	21557301	10931[gene=ENSMUSG00000020321][PH=5][PH0=0.05][P=7.2e-06]	5	-	3	ENSMUSG00000020321	Mdh1	3'UTR	protein_coding	KNOWN	NA	NA	no
chr11	40749146	40749206	22665[gene=ENSMUSG00000020326][PH=9][PH0=0.26][P=3.9e-08]	9	-	4	ENSMUSG00000020326	Ccng1	3'UTR	protein_coding	KNOWN	NA	NA	no
chr11	40750478	40750538	22752[gene=ENSMUSG00000020326][PH=6][PH0=0.26][P=7.6e-04]	6	-	2	ENSMUSG00000020326	Ccng1	3'UTR|intron	protein_coding	KNOWN	NA	NA	yes
chr11	40750402	40750462	22736[gene=ENSMUSG00000020326][PH=8][PH0=0.26][P=1.2e-06]	8	-	3	ENSMUSG00000020326	Ccng1	3'UTR|intron	protein_coding	KNOWN	NA	NA	yes
chr11	40749011	40749071	22643[gene=ENSMUSG00000020326][PH=7][PH0=0.26][P=3.3e-05]	7	-	3	ENSMUSG00000020326	Ccng1	3'UTR	protein_coding	KNOWN	NA	NA	yes
chr11	40748994	40749054	22639[gene=ENSMUSG00000020326][PH=7][PH0=0.26][P=3.3e-05]	7	-	4	ENSMUSG00000020326	Ccng1	3'UTR	protein_coding	KNOWN	NA	NA	yes
chr11	40750216	40750276	22715[gene=ENSMUSG00000020326][PH=8][PH0=0.26][P=1.2e-06]	8	-	3	ENSMUSG00000020326	Ccng1	3'UTR|intron	protein_coding	KNOWN	NA	NA	yes
chr11	40739488	40739548	34900[gene=ENSMUSG00000020328][PH=6][PH0=0.08][P=7.6e-07]	6	+	3	ENSMUSG00000020328	Nudcd2	3'UTR	protein_coding	KNOWN	NA	NA	yes
chr11	40739554	40739614	34908[gene=ENSMUSG00000020328][PH=4][PH0=0.08][P=2.4e-03]	4	+	3	ENSMUSG00000020328	Nudcd2	3'UTR	protein_coding	KNOWN	NA	NA	no
chr11	46309802	46309862	24293[gene=ENSMUSG00000020340][PH=7][PH0=0.16][P=1.1e-05]	7	-	3	ENSMUSG00000020340	Cyfip2	intron	protein_coding	KNOWN	NA	NA	no
chr11	46193967	46194027	23312[gene=ENSMUSG00000020340][PH=9][PH0=0.16][P=4.9e-09]	9	-	4	ENSMUSG00000020340	Cyfip2	3'UTR	protein_coding	KNOWN	NA	NA	yes
chr11	52099020	52099080	42758[gene=ENSMUSG00000020389][PH=3][PH0=0.01][P=1.0e-03]	3	+	2	ENSMUSG00000020349	Ppp2ca	5'UTR|CDS|downstream 10K	protein_coding	KNOWN	NA	NA	no
chr11	52121975	52122035	43315[gene=ENSMUSG00000020349][PH=12][PH0=0.39][P=2.3e-10]	12	+	4	ENSMUSG00000020349	Ppp2ca	3'UTR	protein_coding	KNOWN	NA	NA	no
chr11	52122422	52122482	43363[gene=ENSMUSG00000020349][PH=9][PH0=0.39][P=3.7e-06]	9	+	2	ENSMUSG00000020349	Ppp2ca	3'UTR	protein_coding	KNOWN	NA	NA	yes
chr11	52122258	52122318	43349[gene=ENSMUSG00000020349][PH=7][PH0=0.39][P=1.3e-03]	7	+	3	ENSMUSG00000020349	Ppp2ca	3'UTR	protein_coding	KNOWN	NA	NA	no
chr11	51600991	51601051	30380[gene=ENSMUSG00000020358][PH=39][PH0=1.06][P=1.0e-100]	39	-	4	ENSMUSG00000020358	Hnrnpab	3'UTR	protein_coding	KNOWN	NA	NA	yes
chr11	51601255	51601315	30454[gene=ENSMUSG00000020358][PH=58][PH0=1.06][P=1.0e-100]	58	-	4	ENSMUSG00000020358	Hnrnpab	3'UTR	protein_coding	KNOWN	NA	NA	yes
chr11	51605516	51605576	30714[gene=ENSMUSG00000020358][PH=20][PH0=1.06][P=1.0e-100]	20	-	4	ENSMUSG00000020358	Hnrnpab	CDS	protein_coding	KNOWN	NA	NA	yes
chr11	51604419	51604479	30633[gene=ENSMUSG00000020358][PH=19][PH0=1.06][P=1.0e-100]	19	-	4	ENSMUSG00000020358	Hnrnpab	CDS	protein_coding	KNOWN	NA	NA	yes
chr11	51601385	51601445	30506[gene=ENSMUSG00000020358][PH=12][PH0=1.06][P=6.9e-06]	12	-	3	ENSMUSG00000020358	Hnrnpab	3'UTR|CDS	protein_coding	KNOWN	NA	NA	yes
chr11	53262945	53263005	31712[gene=ENSMUSG00000020361][PH=6][PH0=0.31][P=6.1e-03]	6	-	2	ENSMUSG00000020361	Hspa4	CDS	protein_coding	KNOWN	NA	NA	no
chr11	53272821	53272881	31913[gene=ENSMUSG00000020361][PH=7][PH0=0.31][P=3.1e-04]	7	-	3	ENSMUSG00000020361	Hspa4	CDS	protein_coding	KNOWN	NA	NA	yes
chr11	49673775	49673835	28697[gene=ENSMUSG00000020362][PH=7][PH0=0.16][P=4.2e-06]	7	-	3	ENSMUSG00000020362	Cnot6	3'UTR	protein_coding	KNOWN	NA	NA	no
chr11	49673814	49673874	28706[gene=ENSMUSG00000020362][PH=5][PH0=0.16][P=4.8e-03]	5	-	2	ENSMUSG00000020362	Cnot6	3'UTR	protein_coding	KNOWN	NA	NA	no
chr11	49674485	49674545	28725[gene=ENSMUSG00000020362][PH=5][PH0=0.16][P=4.8e-03]	5	-	2	ENSMUSG00000020362	Cnot6	3'UTR	protein_coding	KNOWN	NA	NA	no
chr11	49671549	49671609	28591[gene=ENSMUSG00000020362][PH=7][PH0=0.16][P=4.2e-06]	7	-	4	ENSMUSG00000020362	Cnot6	3'UTR	protein_coding	KNOWN	NA	NA	no
chr11	49671503	49671563	28583[gene=ENSMUSG00000020362][PH=6][PH0=0.16][P=1.5e-04]	6	-	3	ENSMUSG00000020362	Cnot6	3'UTR	protein_coding	KNOWN	NA	NA	yes
chr11	50295034	50295094	29255[gene=ENSMUSG00000020368][PH=13][PH0=0.53][P=3.2e-10]	13	-	3	ENSMUSG00000020368	Canx	3'UTR	protein_coding	KNOWN	NA	NA	yes
chr11	50304417	50304477	29619[gene=ENSMUSG00000020368][PH=7][PH0=0.53][P=9.2e-03]	7	-	3	ENSMUSG00000020368	Canx	CDS	protein_coding	KNOWN	NA	NA	no
chr11	50294977	50295037	29236[gene=ENSMUSG00000020368][PH=9][PH0=0.53][P=4.7e-05]	9	-	4	ENSMUSG00000020368	Canx	3'UTR	protein_coding	KNOWN	NA	NA	yes
chr11	50295610	50295670	29315[gene=ENSMUSG00000020368][PH=12][PH0=0.53][P=7.1e-09]	12	-	3	ENSMUSG00000020368	Canx	3'UTR	protein_coding	KNOWN	NA	NA	no
chr11	50308329	50308389	29723[gene=ENSMUSG00000020368][PH=9][PH0=0.53][P=4.7e-05]	9	-	3	ENSMUSG00000020368	Canx	CDS	protein_coding	KNOWN	NA	NA	yes
chr11	50299169	50299229	29497[gene=ENSMUSG00000020368][PH=10][PH0=0.53][P=2.8e-06]	10	-	3	ENSMUSG00000020368	Canx	CDS	protein_coding	KNOWN	NA	NA	no
chr11	50296045	50296105	29442[gene=ENSMUSG00000020368][PH=7][PH0=0.53][P=9.2e-03]	7	-	4	ENSMUSG00000020368	Canx	3'UTR	protein_coding	KNOWN	NA	NA	no
chr11	50295850	50295910	29391[gene=ENSMUSG00000020368][PH=44][PH0=0.53][P=2.4e-13]	44	-	4	ENSMUSG00000020368	Canx	3'UTR	protein_coding	KNOWN	NA	NA	yes
chr11	50295677	50295737	29334[gene=ENSMUSG00000020368][PH=8][PH0=0.53][P=7.1e-04]	8	-	2	ENSMUSG00000020368	Canx	3'UTR	protein_coding	KNOWN	NA	NA	no
chr11	50300892	50300952	29539[gene=ENSMUSG00000020368][PH=8][PH0=0.53][P=7.1e-04]	8	-	4	ENSMUSG00000020368	Canx	CDS	protein_coding	KNOWN	NA	NA	no
chr11	50307545	50307605	29685[gene=ENSMUSG00000020368][PH=12][PH0=0.53][P=7.1e-09]	12	-	3	ENSMUSG00000020368	Canx	CDS	protein_coding	KNOWN	NA	NA	yes
chr11	48803113	48803173	40308[gene=ENSMUSG00000064780][PH=9][PH0=0.49][P=6.0e-06]	9	+	3	ENSMUSG00000020372	Gnb2l1	intron	protein_coding	KNOWN	NA	NA	yes
chr11	48803416	48803476	40325[gene=ENSMUSG00000064780][PH=7][PH0=0.49][P=1.4e-03]	7	+	2	ENSMUSG00000020372	Gnb2l1	CDS	protein_coding	KNOWN	NA	NA	no
chr11	48804198	48804258	40362[gene=ENSMUSG00000064780][PH=8][PH0=0.49][P=9.7e-05]	8	+	3	ENSMUSG00000020372	Gnb2l1	CDS	protein_coding	KNOWN	NA	NA	no
chr11	48805978	48806038	40448[gene=ENSMUSG00000064780][PH=9][PH0=0.49][P=6.0e-06]	9	+	2	ENSMUSG00000020372	Gnb2l1	CDS	protein_coding	KNOWN	NA	NA	yes
chr11	48805561	48805621	40414[gene=ENSMUSG00000020372][PH=17][PH0=1.98][P=2.7e-07]	17	+	2	ENSMUSG00000020372	Gnb2l1	CDS	protein_coding	KNOWN	NA	NA	no
chr11	48806033	48806093	40457[gene=ENSMUSG00000064780][PH=7][PH0=0.49][P=1.4e-03]	7	+	3	ENSMUSG00000020372	Gnb2l1	3'UTR	protein_coding	KNOWN	NA	NA	yes
chr11	48800467	48800527	40018[gene=ENSMUSG00000020372][PH=16][PH0=1.98][P=2.1e-06]	16	+	3	ENSMUSG00000020372	Gnb2l1	CDS	protein_coding	KNOWN	NA	NA	yes
chr11	48802050	48802110	40192[gene=ENSMUSG00000020372][PH=528][PH0=1.98][P=1.4e-13]	528	+	4	ENSMUSG00000020372	Gnb2l1	intron	protein_coding	KNOWN	NA	NA	yes
chr11	53631437	53631497	33048[gene=ENSMUSG00000020383][PH=217][PH0=2.54][P=1.0e-100]	217	-	4	ENSMUSG00000020383	Il13	3'UTR	protein_coding	KNOWN	NA	NA	yes
chr11	53631702	53631762	33192[gene=ENSMUSG00000020383][PH=352][PH0=2.54][P=1.0e-100]	352	-	4	ENSMUSG00000020383	Il13	3'UTR	protein_coding	KNOWN	NA	NA	yes
chr11	53631587	53631647	33119[gene=ENSMUSG00000020383][PH=27][PH0=2.54][P=1.0e-100]	27	-	4	ENSMUSG00000020383	Il13	3'UTR	protein_coding	KNOWN	NA	NA	yes
chr11	53632081	53632141	33295[gene=ENSMUSG00000020383][PH=14][PH0=2.54][P=1.6e-03]	14	-	3	ENSMUSG00000020383	Il13	CDS	protein_coding	KNOWN	NA	NA	yes
chr11	53631321	53631381	32959[gene=ENSMUSG00000020383][PH=40][PH0=2.54][P=1.0e-100]	40	-	4	ENSMUSG00000020383	Il13	3'UTR	protein_coding	KNOWN	NA	NA	yes
chr11	53632065	53632125	33290[gene=ENSMUSG00000020383][PH=13][PH0=2.54][P=8.2e-03]	13	-	3	ENSMUSG00000020383	Il13	CDS	protein_coding	KNOWN	NA	NA	yes
chr11	51986451	51986511	31421[gene=ENSMUSG00000097219][PH=22][PH0=0.02][P=1.0e-100]	22	-	4	ENSMUSG00000020390	Ube2b	3'UTR|intron	protein_coding	KNOWN	NA	NA	yes
chr11	51986561	51986621	31442[gene=ENSMUSG00000097219][PH=5][PH0=0.02][P=9.0e-07]	5	-	3	ENSMUSG00000020390	Ube2b	3'UTR|intron	protein_coding	KNOWN	NA	NA	no
chr11	51986576	51986636	31445[gene=ENSMUSG00000097219][PH=5][PH0=0.02][P=9.0e-07]	5	-	2	ENSMUSG00000020390	Ube2b	3'UTR|intron	protein_coding	KNOWN	NA	NA	yes
chr11	51986718	51986778	31458[gene=ENSMUSG00000097219][PH=4][PH0=0.02][P=1.9e-04]	4	-	3	ENSMUSG00000020390	Ube2b	CDS|intron	protein_coding	KNOWN	NA	NA	no
chr11	51986519	51986579	31437[gene=ENSMUSG00000097219][PH=4][PH0=0.02][P=1.9e-04]	4	-	2	ENSMUSG00000020390	Ube2b	3'UTR|intron	protein_coding	KNOWN	NA	NA	no
chr11	51976087	51976147	42722[gene=ENSMUSG00000020392][PH=3][PH0=0.03][P=6.4e-03]	3	+	3	ENSMUSG00000020392	Cdkn2aipnl	3'UTR	protein_coding	KNOWN	NA	NA	yes
chr11	5191612	5191672	2887[gene=ENSMUSG00000020393][PH=5][PH0=0.03][P=2.9e-06]	5	-	4	ENSMUSG00000020393	Kremen1	3'UTR	protein_coding	KNOWN	NA	NA	yes
chr11	46389154	46389214	28167[gene=ENSMUSG00000020395][PH=22][PH0=1.12][P=1.0e-100]	22	-	3	ENSMUSG00000020395	Itk	intron	protein_coding	KNOWN	NA	NA	yes
chr11	46388136	46388196	28079[gene=ENSMUSG00000020395][PH=10][PH0=1.12][P=4.6e-03]	10	-	2	ENSMUSG00000020395	Itk	intron	protein_coding	KNOWN	NA	NA	no
chr11	46370022	46370082	26698[gene=ENSMUSG00000020395][PH=16][PH0=1.12][P=2.6e-09]	16	-	3	ENSMUSG00000020395	Itk	intron	protein_coding	KNOWN	NA	NA	yes
chr11	46325223	46325283	24498[gene=ENSMUSG00000020395][PH=33][PH0=1.12][P=1.0e-100]	33	-	4	ENSMUSG00000020395	Itk	3'UTR	protein_coding	KNOWN	NA	NA	yes
chr11	46389276	46389336	28194[gene=ENSMUSG00000020395][PH=11][PH0=1.12][P=5.2e-04]	11	-	3	ENSMUSG00000020395	Itk	CDS	protein_coding	KNOWN	NA	NA	yes
chr11	46325140	46325200	24466[gene=ENSMUSG00000020395][PH=10][PH0=1.12][P=4.6e-03]	10	-	4	ENSMUSG00000020395	Itk	3'UTR	protein_coding	KNOWN	NA	NA	yes
chr11	46386323	46386383	27930[gene=ENSMUSG00000020395][PH=15][PH0=1.12][P=3.5e-08]	15	-	4	ENSMUSG00000020395	Itk	intron	protein_coding	KNOWN	NA	NA	no
chr11	46343361	46343421	25170[gene=ENSMUSG00000020395][PH=11][PH0=1.12][P=5.2e-04]	11	-	2	ENSMUSG00000020395	Itk	downstream 10K|intron	protein_coding	KNOWN	NA	NA	no
chr11	46363223	46363283	26342[gene=ENSMUSG00000020395][PH=10][PH0=1.12][P=4.6e-03]	10	-	4	ENSMUSG00000020395	Itk	intron	protein_coding	KNOWN	NA	NA	no
chr11	46325187	46325247	24481[gene=ENSMUSG00000020395][PH=11][PH0=1.12][P=5.2e-04]	11	-	4	ENSMUSG00000020395	Itk	3'UTR	protein_coding	KNOWN	NA	NA	yes
chr11	46469471	46469531	39467[gene=ENSMUSG00000020399][PH=8][PH0=0.76][P=8.7e-03]	8	+	2	ENSMUSG00000020399	Havcr2	CDS	protein_coding	KNOWN	NA	NA	no
chr11	46458366	46458426	38851[gene=ENSMUSG00000020399][PH=8][PH0=0.76][P=8.7e-03]	8	+	3	ENSMUSG00000020399	Havcr2	intron	protein_coding	KNOWN	NA	NA	no
chr11	46462879	46462939	39142[gene=ENSMUSG00000020399][PH=8][PH0=0.76][P=8.7e-03]	8	+	2	ENSMUSG00000020399	Havcr2	intron	protein_coding	KNOWN	NA	NA	no
chr11	54953604	54953664	35357[gene=ENSMUSG00000020400][PH=4][PH0=0.06][P=3.4e-03]	4	-	2	ENSMUSG00000020400	Tnip1	intron	protein_coding	KNOWN	NA	NA	no
chr11	46399782	46399842	38542[gene=ENSMUSG00000020401][PH=4][PH0=0.10][P=8.2e-03]	4	+	3	ENSMUSG00000020401	Fam71b	intron	protein_coding	KNOWN	NA	NA	no
chr1	134075980	134076040	82908[gene=ENSMUSG00000020423][PH=7][PH0=0.20][P=5.4e-06]	7	-	3	ENSMUSG00000020423	Btg2	3'UTR	protein_coding	KNOWN	NA	NA	yes
chr1	134077194	134077254	82949[gene=ENSMUSG00000020423][PH=15][PH0=0.20][P=4.0e-14]	15	-	4	ENSMUSG00000020423	Btg2	3'UTR	protein_coding	KNOWN	NA	NA	yes
chr11	6511868	6511928	6797[gene=ENSMUSG00000020437][PH=7][PH0=0.54][P=6.1e-03]	7	-	2	ENSMUSG00000020437	Myo1g	downstream 10K|intron	protein_coding	KNOWN	NA	NA	no
chr11	6519129	6519189	7150[gene=ENSMUSG00000064513][PH=6][PH0=0.44][P=8.9e-03]	6	-	2	ENSMUSG00000020437	Myo1g	CDS|intron	protein_coding	KNOWN	NA	NA	no
chr6	28426551	28426611	8190[gene=ENSMUSG00000020440][PH=9][PH0=0.06][P=1.5e-13]	9	+	3	ENSMUSG00000020440	Arf5	3'UTR	protein_coding	KNOWN	NA	NA	no
chr11	3406651	3406711	378[gene=ENSMUSG00000020448][PH=3][PH0=0.02][P=7.5e-03]	3	-	3	ENSMUSG00000020451	Limk2	downstream 10K|intron	protein_coding	KNOWN	NA	NA	no
chr11	3244300	3244360	368[gene=ENSMUSG00000020454][PH=5][PH0=0.15][P=3.3e-03]	5	+	2	ENSMUSG00000020454	Eif4enif1	3'UTR	protein_coding	KNOWN	NA	NA	no
chr11	58991401	58991461	53915[gene=ENSMUSG00000020455][PH=7][PH0=0.08][P=1.6e-08]	7	+	3	ENSMUSG00000020455	Trim11	3'UTR	protein_coding	KNOWN	NA	NA	yes
chr11	6356542	6356602	3949[gene=ENSMUSG00000020456][PH=29][PH0=0.11][P=1.0e-100]	29	+	4	ENSMUSG00000020456	Ogdh	3'UTR	protein_coding	KNOWN	NA	NA	yes
chr11	29221774	29221834	14482[gene=ENSMUSG00000020462][PH=3][PH0=0.03][P=8.9e-03]	3	-	2	ENSMUSG00000020462	Ccdc104	3'UTR	protein_coding	KNOWN	NA	NA	no
chr11	29211059	29211119	24682[gene=ENSMUSG00000020463][PH=5][PH0=0.17][P=8.0e-03]	5	+	2	ENSMUSG00000020463	Smek2	downstream 10K|intron	protein_coding	KNOWN	NA	NA	no
chr11	29161614	29161674	24286[gene=ENSMUSG00000020464][PH=9][PH0=0.12][P=1.3e-10]	9	+	4	ENSMUSG00000020464	Pnpt1	3'UTR	protein_coding	KNOWN	NA	NA	yes
chr11	5789304	5789364	3402[gene=ENSMUSG00000083844][PH=4][PH0=0.06][P=1.5e-03]	4	+	2	ENSMUSG00000020476	Dbnl	intron	protein_coding	KNOWN	NA	NA	no
chr11	5634238	5634298	3359[gene=ENSMUSG00000020481][PH=3][PH0=0.00][P=2.9e-06]	3	+	2	ENSMUSG00000020481	Ankrd36	intron	protein_coding	KNOWN	NA	NA	no
chr11	5529915	5529975	4884[gene=ENSMUSG00000020482][PH=5][PH0=0.04][P=3.7e-06]	5	-	4	ENSMUSG00000020482	Ccdc117	3'UTR	protein_coding	KNOWN	NA	NA	yes
chr11	5525723	5525783	3300[gene=ENSMUSG00000020484][PH=12][PH0=0.33][P=1.2e-11]	12	+	3	ENSMUSG00000020484	Xbp1	3'UTR	protein_coding	KNOWN	NA	NA	no
chr11	5521804	5521864	3155[gene=ENSMUSG00000020484][PH=6][PH0=0.33][P=2.9e-03]	6	+	3	ENSMUSG00000020484	Xbp1	5'UTR|intron	protein_coding	KNOWN	NA	NA	no
chr11	5525838	5525898	3328[gene=ENSMUSG00000020484][PH=27][PH0=0.33][P=1.0e-100]	27	+	4	ENSMUSG00000020484	Xbp1	3'UTR	protein_coding	KNOWN	NA	NA	yes
chr11	87113035	87113095	83090[gene=ENSMUSG00000065589][PH=3][PH0=0.04][P=9.4e-03]	3	+	2	ENSMUSG00000020492	Ska2	intron	protein_coding	KNOWN	NA	NA	yes
chr11	87077740	87077800	66508[gene=ENSMUSG00000020495][PH=9][PH0=0.03][P=1.0e-100]	9	-	3	ENSMUSG00000020495	Smg8	3'UTR	protein_coding	KNOWN	NA	NA	no
chr11	58118536	58118596	53326[gene=ENSMUSG00000020515][PH=8][PH0=0.04][P=1.5e-12]	8	+	3	ENSMUSG00000020515	Cnot8	3'UTR	protein_coding	KNOWN	NA	NA	yes
chr11	60199585	60199645	37594[gene=ENSMUSG00000020538][PH=8][PH0=0.13][P=1.4e-08]	8	-	4	ENSMUSG00000020538	Srebf1	3'UTR	protein_coding	KNOWN	NA	NA	yes
chr12	33439353	33439413	17659[gene=ENSMUSG00000020561][PH=4][PH0=0.10][P=7.1e-03]	4	+	3	ENSMUSG00000020561	Twistnb	3'UTR	protein_coding	KNOWN	NA	NA	yes
chr12	33156099	33156159	14902[gene=ENSMUSG00000020564][PH=6][PH0=0.24][P=8.0e-03]	6	+	3	ENSMUSG00000020564	Atxn7l1	intron	protein_coding	KNOWN	NA	NA	no
chr12	33151681	33151741	14792[gene=ENSMUSG00000020564][PH=6][PH0=0.24][P=8.0e-03]	6	+	3	ENSMUSG00000020564	Atxn7l1	intron	protein_coding	KNOWN	NA	NA	no
chr12	33148465	33148525	14706[gene=ENSMUSG00000084979][PH=3][PH0=0.02][P=2.2e-03]	3	+	2	ENSMUSG00000020564	Atxn7l1	CDS|intron	protein_coding	KNOWN	NA	NA	no
chr12	33374474	33374534	17555[gene=ENSMUSG00000020564][PH=7][PH0=0.24][P=3.3e-04]	7	+	2	ENSMUSG00000020564	Atxn7l1	3'UTR	protein_coding	KNOWN	NA	NA	no
chr12	33156120	33156180	14905[gene=ENSMUSG00000020564][PH=7][PH0=0.24][P=3.3e-04]	7	+	4	ENSMUSG00000020564	Atxn7l1	intron	protein_coding	KNOWN	NA	NA	no
chr12	17284271	17284331	9007[gene=ENSMUSG00000020571][PH=6][PH0=0.20][P=3.1e-04]	6	+	2	ENSMUSG00000020571	Pdia6	3'UTR	protein_coding	KNOWN	NA	NA	no
chr12	17274389	17274449	8849[gene=ENSMUSG00000020571][PH=7][PH0=0.20][P=1.1e-05]	7	+	3	ENSMUSG00000020571	Pdia6	CDS	protein_coding	KNOWN	NA	NA	no
chr12	17284144	17284204	8992[gene=ENSMUSG00000020571][PH=7][PH0=0.20][P=1.1e-05]	7	+	3	ENSMUSG00000020571	Pdia6	3'UTR	protein_coding	KNOWN	NA	NA	no
chr12	32850702	32850762	14547[gene=ENSMUSG00000020572][PH=6][PH0=0.18][P=2.2e-04]	6	+	3	ENSMUSG00000020572	Nampt	3'UTR	protein_coding	KNOWN	NA	NA	no
chr12	32850846	32850906	14562[gene=ENSMUSG00000020572][PH=7][PH0=0.18][P=6.4e-06]	7	+	4	ENSMUSG00000020572	Nampt	3'UTR	protein_coding	KNOWN	NA	NA	yes
chr12	32850892	32850952	14568[gene=ENSMUSG00000020572][PH=5][PH0=0.18][P=6.2e-03]	5	+	4	ENSMUSG00000020572	Nampt	3'UTR	protein_coding	KNOWN	NA	NA	yes
chr12	16985687	16985747	8676[gene=ENSMUSG00000020580][PH=6][PH0=0.23][P=2.8e-03]	6	+	4	ENSMUSG00000020580	Rock2	3'UTR	protein_coding	KNOWN	NA	NA	yes
chr12	16985792	16985852	8695[gene=ENSMUSG00000020580][PH=10][PH0=0.23][P=2.9e-09]	10	+	3	ENSMUSG00000020580	Rock2	3'UTR	protein_coding	KNOWN	NA	NA	yes
chr12	16943504	16943564	8127[gene=ENSMUSG00000020580][PH=10][PH0=0.23][P=2.9e-09]	10	+	3	ENSMUSG00000020580	Rock2	intron	protein_coding	KNOWN	NA	NA	no
chr12	16985402	16985462	8649[gene=ENSMUSG00000020580][PH=10][PH0=0.23][P=2.9e-09]	10	+	3	ENSMUSG00000020580	Rock2	3'UTR	protein_coding	KNOWN	NA	NA	yes
chr12	16985154	16985214	8620[gene=ENSMUSG00000020580][PH=6][PH0=0.23][P=2.8e-03]	6	+	2	ENSMUSG00000020580	Rock2	3'UTR	protein_coding	KNOWN	NA	NA	yes
chr12	8749887	8749947	5793[gene=ENSMUSG00000020594][PH=16][PH0=0.44][P=2.5e-13]	16	+	4	ENSMUSG00000020594	Pum2	3'UTR	protein_coding	KNOWN	NA	NA	yes
chr12	8750053	8750113	5816[gene=ENSMUSG00000020594][PH=8][PH0=0.44][P=3.9e-04]	8	+	4	ENSMUSG00000020594	Pum2	3'UTR	protein_coding	KNOWN	NA	NA	yes
chr12	8750079	8750139	5821[gene=ENSMUSG00000020594][PH=7][PH0=0.44][P=6.1e-03]	7	+	4	ENSMUSG00000020594	Pum2	3'UTR	protein_coding	KNOWN	NA	NA	yes
chr12	8750186	8750246	5844[gene=ENSMUSG00000020594][PH=15][PH0=0.44][P=5.0e-13]	15	+	4	ENSMUSG00000020594	Pum2	3'UTR	protein_coding	KNOWN	NA	NA	yes
chr12	8692416	8692476	4496[gene=ENSMUSG00000020594][PH=10][PH0=0.44][P=1.1e-06]	10	+	3	ENSMUSG00000020594	Pum2	intron	protein_coding	KNOWN	NA	NA	no
chr12	15792948	15793008	2399[gene=ENSMUSG00000020601][PH=14][PH0=1.23][P=6.6e-07]	14	-	2	ENSMUSG00000020601	Trib2	3'UTR	protein_coding	KNOWN	NA	NA	no
chr12	15793115	15793175	2474[gene=ENSMUSG00000020601][PH=55][PH0=1.23][P=1.0e-100]	55	-	4	ENSMUSG00000020601	Trib2	3'UTR	protein_coding	KNOWN	NA	NA	yes
chr12	15794140	15794200	2608[gene=ENSMUSG00000020601][PH=10][PH0=1.23][P=4.8e-03]	10	-	3	ENSMUSG00000020601	Trib2	intron	protein_coding	KNOWN	NA	NA	yes
chr12	15816119	15816179	3713[gene=ENSMUSG00000020601][PH=35][PH0=1.23][P=1.0e-100]	35	-	4	ENSMUSG00000020601	Trib2	5'UTR	protein_coding	KNOWN	NA	NA	yes
chr12	15814103	15814163	3534[gene=ENSMUSG00000020601][PH=16][PH0=1.23][P=4.8e-09]	16	-	4	ENSMUSG00000020601	Trib2	intron	protein_coding	KNOWN	NA	NA	yes
chr12	15792611	15792671	2332[gene=ENSMUSG00000020601][PH=16][PH0=1.23][P=4.8e-09]	16	-	3	ENSMUSG00000020601	Trib2	3'UTR	protein_coding	KNOWN	NA	NA	no
chr12	15793430	15793490	2544[gene=ENSMUSG00000020601][PH=12][PH0=1.23][P=6.8e-05]	12	-	4	ENSMUSG00000020601	Trib2	3'UTR	protein_coding	KNOWN	NA	NA	no
chr12	15809360	15809420	3210[gene=ENSMUSG00000020601][PH=11][PH0=1.23][P=6.0e-04]	11	-	3	ENSMUSG00000020601	Trib2	intron	protein_coding	KNOWN	NA	NA	no
chr12	15815437	15815497	3626[gene=ENSMUSG00000020601][PH=14][PH0=1.23][P=6.6e-07]	14	-	3	ENSMUSG00000020601	Trib2	CDS	protein_coding	KNOWN	NA	NA	no
chr12	15793256	15793316	2519[gene=ENSMUSG00000020601][PH=10][PH0=1.23][P=4.8e-03]	10	-	2	ENSMUSG00000020601	Trib2	3'UTR	protein_coding	KNOWN	NA	NA	no
chr12	15792427	15792487	2294[gene=ENSMUSG00000020601][PH=37][PH0=1.23][P=1.0e-100]	37	-	4	ENSMUSG00000020601	Trib2	3'UTR	protein_coding	KNOWN	NA	NA	yes
chr12	15792820	15792880	2366[gene=ENSMUSG00000020601][PH=10][PH0=1.23][P=4.8e-03]	10	-	2	ENSMUSG00000020601	Trib2	3'UTR	protein_coding	KNOWN	NA	NA	no
chr12	15791720	15791780	2135[gene=ENSMUSG00000020601][PH=58][PH0=1.23][P=1.0e-100]	58	-	4	ENSMUSG00000020601	Trib2	3'UTR	protein_coding	KNOWN	NA	NA	yes
chr12	15812336	15812396	3424[gene=ENSMUSG00000020601][PH=11][PH0=1.23][P=6.0e-04]	11	-	3	ENSMUSG00000020601	Trib2	intron	protein_coding	KNOWN	NA	NA	yes
chr11	109401304	109401364	99827[gene=ENSMUSG00000020611][PH=16][PH0=0.43][P=1.0e-100]	16	+	4	ENSMUSG00000020611	Gna13	3'UTR	protein_coding	KNOWN	NA	NA	yes
chr11	109399899	109399959	99705[gene=ENSMUSG00000020611][PH=7][PH0=0.43][P=3.0e-03]	7	+	3	ENSMUSG00000020611	Gna13	3'UTR	protein_coding	KNOWN	NA	NA	no
chr11	109400600	109400660	99743[gene=ENSMUSG00000020611][PH=9][PH0=0.43][P=1.0e-05]	9	+	4	ENSMUSG00000020611	Gna13	3'UTR	protein_coding	KNOWN	NA	NA	no
chr11	109399654	109399714	99674[gene=ENSMUSG00000020611][PH=13][PH0=0.43][P=3.1e-11]	13	+	3	ENSMUSG00000020611	Gna13	3'UTR	protein_coding	KNOWN	NA	NA	yes
chr11	109401183	109401243	99798[gene=ENSMUSG00000020611][PH=10][PH0=0.43][P=5.0e-07]	10	+	4	ENSMUSG00000020611	Gna13	3'UTR	protein_coding	KNOWN	NA	NA	yes
chr11	109399278	109399338	99648[gene=ENSMUSG00000020611][PH=7][PH0=0.43][P=3.0e-03]	7	+	3	ENSMUSG00000020611	Gna13	3'UTR	protein_coding	KNOWN	NA	NA	no
chr11	109399870	109399930	99700[gene=ENSMUSG00000020611][PH=9][PH0=0.43][P=1.0e-05]	9	+	3	ENSMUSG00000020611	Gna13	3'UTR	protein_coding	KNOWN	NA	NA	no
chr11	109396542	109396602	99515[gene=ENSMUSG00000020611][PH=10][PH0=0.43][P=5.0e-07]	10	+	3	ENSMUSG00000020611	Gna13	3'UTR	protein_coding	KNOWN	NA	NA	no
chr11	109401089	109401149	99781[gene=ENSMUSG00000020611][PH=13][PH0=0.43][P=3.1e-11]	13	+	3	ENSMUSG00000020611	Gna13	3'UTR	protein_coding	KNOWN	NA	NA	yes
chr11	109400537	109400597	99730[gene=ENSMUSG00000020611][PH=8][PH0=0.43][P=1.9e-04]	8	+	4	ENSMUSG00000020611	Gna13	3'UTR	protein_coding	KNOWN	NA	NA	no
chr11	109668055	109668115	100211[gene=ENSMUSG00000020612][PH=9][PH0=0.36][P=1.3e-06]	9	+	2	ENSMUSG00000020612	Prkar1a	3'UTR	protein_coding	KNOWN	NA	NA	no
chr11	109669126	109669186	100351[gene=ENSMUSG00000020612][PH=9][PH0=0.36][P=1.3e-06]	9	+	4	ENSMUSG00000020612	Prkar1a	3'UTR	protein_coding	KNOWN	NA	NA	yes
chr11	109668919	109668979	100310[gene=ENSMUSG00000020612][PH=11][PH0=0.36][P=1.9e-09]	11	+	4	ENSMUSG00000020612	Prkar1a	3'UTR	protein_coding	KNOWN	NA	NA	yes
chr11	109661475	109661535	100049[gene=ENSMUSG00000020612][PH=6][PH0=0.36][P=9.1e-03]	6	+	3	ENSMUSG00000020612	Prkar1a	3'UTR|intron	protein_coding	KNOWN	NA	NA	no
chr11	109667717	109667777	100172[gene=ENSMUSG00000020612][PH=15][PH0=0.36][P=1.7e-13]	15	+	3	ENSMUSG00000020612	Prkar1a	3'UTR	protein_coding	KNOWN	NA	NA	yes
chr11	109669188	109669248	100371[gene=ENSMUSG00000020612][PH=8][PH0=0.36][P=2.9e-05]	8	+	4	ENSMUSG00000020612	Prkar1a	3'UTR	protein_coding	KNOWN	NA	NA	yes
chr11	109668297	109668357	100235[gene=ENSMUSG00000020612][PH=6][PH0=0.36][P=9.1e-03]	6	+	3	ENSMUSG00000020612	Prkar1a	3'UTR	protein_coding	KNOWN	NA	NA	yes
chr11	109668728	109668788	100262[gene=ENSMUSG00000020612][PH=10][PH0=0.36][P=5.2e-08]	10	+	2	ENSMUSG00000020612	Prkar1a	3'UTR	protein_coding	KNOWN	NA	NA	yes
chr11	109668777	109668837	100275[gene=ENSMUSG00000020612][PH=11][PH0=0.36][P=1.9e-09]	11	+	4	ENSMUSG00000020612	Prkar1a	3'UTR	protein_coding	KNOWN	NA	NA	yes
chr12	28659540	28659600	12484[gene=ENSMUSG00000020630][PH=7][PH0=0.06][P=1.3e-09]	7	+	4	ENSMUSG00000020630	Rnaseh1	3'UTR	protein_coding	KNOWN	NA	NA	yes
chr12	4634240	4634300	2803[gene=ENSMUSG00000020640][PH=5][PH0=0.13][P=4.0e-03]	5	+	2	ENSMUSG00000020640	Itsn2	intron	protein_coding	KNOWN	NA	NA	no
chr12	4677732	4677792	3112[gene=ENSMUSG00000020640][PH=8][PH0=0.13][P=4.0e-08]	8	+	3	ENSMUSG00000020640	Itsn2	intron	protein_coding	KNOWN	NA	NA	no
chr12	25094272	25094332	4703[gene=ENSMUSG00000020644][PH=60][PH0=0.56][P=3.5e-14]	60	-	4	ENSMUSG00000020644	Id2	3'UTR	protein_coding	KNOWN	NA	NA	yes
chr12	25094163	25094223	4652[gene=ENSMUSG00000020644][PH=7][PH0=0.56][P=4.1e-03]	7	-	3	ENSMUSG00000020644	Id2	3'UTR	protein_coding	KNOWN	NA	NA	no
chr12	25093791	25093851	4608[gene=ENSMUSG00000020644][PH=11][PH0=0.56][P=8.5e-08]	11	-	3	ENSMUSG00000020644	Id2	3'UTR	protein_coding	KNOWN	NA	NA	no
chr12	25094067	25094127	4637[gene=ENSMUSG00000020644][PH=10][PH0=0.56][P=1.5e-06]	10	-	4	ENSMUSG00000020644	Id2	3'UTR	protein_coding	KNOWN	NA	NA	no
chr12	25094177	25094237	4655[gene=ENSMUSG00000020644][PH=8][PH0=0.56][P=3.4e-04]	8	-	3	ENSMUSG00000020644	Id2	3'UTR	protein_coding	KNOWN	NA	NA	no
chr12	25094446	25094506	4760[gene=ENSMUSG00000020644][PH=12][PH0=0.56][P=4.4e-09]	12	-	3	ENSMUSG00000020644	Id2	3'UTR	protein_coding	KNOWN	NA	NA	no
chr12	24714051	24714111	11684[gene=ENSMUSG00000020649][PH=15][PH0=0.08][P=1.0e-100]	15	+	4	ENSMUSG00000020649	Rrm2	3'UTR	protein_coding	KNOWN	NA	NA	yes
chr12	4108880	4108940	2327[gene=ENSMUSG00000020657][PH=6][PH0=0.03][P=2.3e-09]	6	+	4	ENSMUSG00000020657	Dnajc27	3'UTR	protein_coding	KNOWN	NA	NA	yes
chr12	3913412	3913472	2268[gene=ENSMUSG00000020661][PH=6][PH0=0.20][P=1.4e-03]	6	+	4	ENSMUSG00000020661	Dnmt3a	3'UTR	protein_coding	KNOWN	NA	NA	no
chr12	3913387	3913447	2263[gene=ENSMUSG00000020661][PH=7][PH0=0.20][P=4.7e-05]	7	+	4	ENSMUSG00000020661	Dnmt3a	3'UTR	protein_coding	KNOWN	NA	NA	no
chr12	3913159	3913219	2235[gene=ENSMUSG00000020661][PH=15][PH0=0.20][P=1.0e-100]	15	+	4	ENSMUSG00000020661	Dnmt3a	3'UTR	protein_coding	KNOWN	NA	NA	yes
chr12	3403057	3403117	113[gene=ENSMUSG00000020668][PH=4][PH0=0.01][P=2.1e-06]	4	+	4	ENSMUSG00000020668	Kif3c	3'UTR	protein_coding	KNOWN	NA	NA	no
chr12	3248457	3248517	46[gene=ENSMUSG00000020671][PH=8][PH0=0.25][P=3.9e-06]	8	-	3	ENSMUSG00000020671	Rab10	3'UTR	protein_coding	KNOWN	NA	NA	yes
chr12	3249572	3249632	99[gene=ENSMUSG00000020671][PH=12][PH0=0.25][P=1.9e-12]	12	-	4	ENSMUSG00000020671	Rab10	3'UTR	protein_coding	KNOWN	NA	NA	yes
chr11	83506642	83506702	79780[gene=ENSMUSG00000020680][PH=8][PH0=0.44][P=1.9e-04]	8	+	2	ENSMUSG00000020680	Taf15	3'UTR	protein_coding	KNOWN	NA	NA	no
chr11	83494503	83494563	79472[gene=ENSMUSG00000020680][PH=7][PH0=0.44][P=3.0e-03]	7	+	2	ENSMUSG00000020680	Taf15	intron	protein_coding	KNOWN	NA	NA	no
chr11	104503157	104503217	90608[gene=ENSMUSG00000020687][PH=8][PH0=0.16][P=8.7e-08]	8	-	4	ENSMUSG00000020687	Cdc27	3'UTR	protein_coding	KNOWN	NA	NA	no
chr11	104504897	104504957	90662[gene=ENSMUSG00000020687][PH=6][PH0=0.16][P=1.5e-04]	6	-	4	ENSMUSG00000020687	Cdc27	3'UTR	protein_coding	KNOWN	NA	NA	no
chr11	104668678	104668738	96336[gene=ENSMUSG00000020689][PH=3][PH0=0.01][P=9.9e-04]	3	+	3	ENSMUSG00000020689	Itgb3	3'UTR	protein_coding	KNOWN	NA	NA	no
chr11	82803816	82803876	77544[gene=ENSMUSG00000020697][PH=4][PH0=0.08][P=6.2e-03]	4	+	3	ENSMUSG00000020697	Lig3	3'UTR|intron	protein_coding	KNOWN	NA	NA	no
chr11	81583220	81583280	57013[gene=ENSMUSG00000020704][PH=2][PH0=0.00][P=3.2e-04]	2	-	2	ENSMUSG00000020704	Asic2	intron	protein_coding	KNOWN	NA	NA	yes
chr11	106262571	106262631	97951[gene=ENSMUSG00000020708][PH=4][PH0=0.06][P=8.7e-04]	4	+	2	ENSMUSG00000020708	Psmc5	3'UTR|CDS	protein_coding	KNOWN	NA	NA	no
chr11	106394779	106394839	91492[gene=ENSMUSG00000020715][PH=6][PH0=0.26][P=4.9e-03]	6	-	3	ENSMUSG00000020715	Ern1	3'UTR	protein_coding	KNOWN	NA	NA	no
chr11	106397394	106397454	91621[gene=ENSMUSG00000020715][PH=6][PH0=0.26][P=4.9e-03]	6	-	4	ENSMUSG00000020715	Ern1	3'UTR	protein_coding	KNOWN	NA	NA	no
chr11	106395089	106395149	91533[gene=ENSMUSG00000020715][PH=23][PH0=0.26][P=1.0e-100]	23	-	4	ENSMUSG00000020715	Ern1	3'UTR	protein_coding	KNOWN	NA	NA	yes
chr11	79579739	79579799	74092[gene=ENSMUSG00000020716][PH=4][PH0=0.05][P=9.0e-03]	4	+	3	ENSMUSG00000020716	Nf1	3'UTR	protein_coding	KNOWN	NA	NA	no
chr11	106654362	106654422	93146[gene=ENSMUSG00000020717][PH=12][PH0=0.16][P=1.0e-100]	12	-	3	ENSMUSG00000020717	Pecam1	3'UTR	protein_coding	KNOWN	NA	NA	yes
chr11	106740227	106740287	93806[gene=ENSMUSG00000020717][PH=6][PH0=0.16][P=2.8e-04]	6	-	3	ENSMUSG00000020717	Pecam1	intron	protein_coding	KNOWN	NA	NA	no
chr11	106739650	106739710	93788[gene=ENSMUSG00000020717][PH=6][PH0=0.16][P=2.8e-04]	6	-	2	ENSMUSG00000020717	Pecam1	intron	protein_coding	KNOWN	NA	NA	no
chr11	106740056	106740116	93799[gene=ENSMUSG00000020717][PH=5][PH0=0.16][P=8.9e-03]	5	-	3	ENSMUSG00000020717	Pecam1	intron	protein_coding	KNOWN	NA	NA	no
chr11	106783919	106783979	94452[gene=ENSMUSG00000020719][PH=8][PH0=0.82][P=7.9e-03]	8	-	2	ENSMUSG00000020719	Ddx5	3'UTR|intron	protein_coding	KNOWN	NA	NA	no
chr11	106783800	106783860	94423[gene=ENSMUSG00000020719][PH=16][PH0=0.82][P=6.9e-12]	16	-	2	ENSMUSG00000020719	Ddx5	3'UTR|intron	protein_coding	KNOWN	NA	NA	yes
chr11	106783399	106783459	94355[gene=ENSMUSG00000020719][PH=19][PH0=0.82][P=1.1e-13]	19	-	2	ENSMUSG00000020719	Ddx5	3'UTR|intron	protein_coding	KNOWN	NA	NA	no
chr11	106783274	106783334	94319[gene=ENSMUSG00000020719][PH=13][PH0=0.82][P=3.3e-08]	13	-	3	ENSMUSG00000020719	Ddx5	3'UTR|intron	protein_coding	KNOWN	NA	NA	no
chr11	106783067	106783127	94271[gene=ENSMUSG00000020719][PH=19][PH0=0.82][P=1.1e-13]	19	-	4	ENSMUSG00000020719	Ddx5	3'UTR|intron	protein_coding	KNOWN	NA	NA	yes
chr11	106783177	106783237	94296[gene=ENSMUSG00000020719][PH=11][PH0=0.82][P=6.3e-06]	11	-	3	ENSMUSG00000020719	Ddx5	3'UTR|intron	protein_coding	KNOWN	NA	NA	no
chr11	106782267	106782327	94158[gene=ENSMUSG00000093273][PH=7][PH0=0.46][P=9.5e-04]	7	-	2	ENSMUSG00000020719	Ddx5	downstream 10K|intron	protein_coding	KNOWN	NA	NA	no
chr11	106783951	106784011	94458[gene=ENSMUSG00000020719][PH=8][PH0=0.82][P=7.9e-03]	8	-	3	ENSMUSG00000020719	Ddx5	CDS|intron	protein_coding	KNOWN	NA	NA	no
chr11	106782674	106782734	94181[gene=ENSMUSG00000020719][PH=11][PH0=0.82][P=6.3e-06]	11	-	3	ENSMUSG00000020719	Ddx5	3'UTR|intron	protein_coding	KNOWN	NA	NA	no
chr11	106780667	106780727	94026[gene=ENSMUSG00000020719][PH=8][PH0=0.82][P=7.9e-03]	8	-	4	ENSMUSG00000020719	Ddx5	3'UTR	protein_coding	KNOWN	NA	NA	yes
chr11	106783119	106783179	94285[gene=ENSMUSG00000020719][PH=8][PH0=0.82][P=7.9e-03]	8	-	3	ENSMUSG00000020719	Ddx5	3'UTR|intron	protein_coding	KNOWN	NA	NA	no
chr11	106781712	106781772	94135[gene=ENSMUSG00000020719][PH=10][PH0=0.82][P=7.6e-05]	10	-	4	ENSMUSG00000020719	Ddx5	3'UTR	protein_coding	KNOWN	NA	NA	no
chr11	106781634	106781694	94118[gene=ENSMUSG00000020719][PH=8][PH0=0.82][P=7.9e-03]	8	-	4	ENSMUSG00000020719	Ddx5	3'UTR	protein_coding	KNOWN	NA	NA	yes
chr11	106781413	106781473	94092[gene=ENSMUSG00000093273][PH=7][PH0=0.46][P=9.5e-04]	7	-	3	ENSMUSG00000020719	Ddx5	3'UTR	protein_coding	KNOWN	NA	NA	yes
chr11	106782819	106782879	94214[gene=ENSMUSG00000020719][PH=15][PH0=0.82][P=1.2e-10]	15	-	3	ENSMUSG00000020719	Ddx5	3'UTR|intron	protein_coding	KNOWN	NA	NA	yes
chr11	106783005	106783065	94251[gene=ENSMUSG00000020719][PH=8][PH0=0.82][P=7.9e-03]	8	-	2	ENSMUSG00000020719	Ddx5	3'UTR|intron	protein_coding	KNOWN	NA	NA	no
chr11	107497615	107497675	98426[gene=ENSMUSG00000020720][PH=20][PH0=0.11][P=1.0e-100]	20	+	4	ENSMUSG00000020720	Psmd12	CDS|intron	protein_coding	KNOWN	NA	NA	yes
chr11	107619143	107619203	98619[gene=ENSMUSG00000020721][PH=4][PH0=0.04][P=1.1e-03]	4	+	3	ENSMUSG00000020721	Helz	CDS	protein_coding	KNOWN	NA	NA	yes
chr11	115181036	115181096	100680[gene=ENSMUSG00000020733][PH=6][PH0=0.05][P=1.1e-07]	6	+	3	ENSMUSG00000020733	Slc9a3r1	3'UTR	protein_coding	KNOWN	NA	NA	no
chr11	115535042	115535102	108995[gene=ENSMUSG00000020738][PH=5][PH0=0.11][P=3.4e-04]	5	-	3	ENSMUSG00000020738	Sumo2	5'UTR|intron	protein_coding	KNOWN	NA	NA	no
chr11	115581025	115581085	100933[gene=ENSMUSG00000020739][PH=6][PH0=0.09][P=2.3e-06]	6	+	2	ENSMUSG00000020739	Nup85	CDS	protein_coding	KNOWN	NA	NA	yes
chr11	115614967	115615027	109169[gene=ENSMUSG00000020744][PH=8][PH0=0.14][P=1.5e-08]	8	-	4	ENSMUSG00000020744	Slc25a19	3'UTR	protein_coding	KNOWN	NA	NA	yes
chr11	115626620	115626680	109274[gene=ENSMUSG00000020744][PH=5][PH0=0.14][P=1.1e-03]	5	-	3	ENSMUSG00000020744	Slc25a19	intron	protein_coding	KNOWN	NA	NA	no
chr11	74724218	74724278	47774[gene=ENSMUSG00000081252][PH=4][PH0=0.07][P=9.1e-04]	4	-	3	ENSMUSG00000020745	Pafah1b1	5'UTR	protein_coding	KNOWN	NA	NA	no
chr11	74677517	74677577	47159[gene=ENSMUSG00000020745][PH=9][PH0=0.23][P=4.5e-08]	9	-	4	ENSMUSG00000020745	Pafah1b1	3'UTR	protein_coding	KNOWN	NA	NA	yes
chr11	116245179	116245239	110469[gene=ENSMUSG00000020780][PH=6][PH0=0.13][P=3.3e-05]	6	-	4	ENSMUSG00000020780	Srp68	3'UTR	protein_coding	KNOWN	NA	NA	yes
chr11	116272298	116272358	110672[gene=ENSMUSG00000020780][PH=5][PH0=0.13][P=1.3e-03]	5	-	2	ENSMUSG00000020780	Srp68	intron	protein_coding	KNOWN	NA	NA	no
chr11	115855702	115855762	101125[gene=ENSMUSG00000020782][PH=3][PH0=0.01][P=1.5e-03]	3	+	3	ENSMUSG00000020782	Llgl2	3'UTR	protein_coding	KNOWN	NA	NA	yes
chr11	73080015	73080075	65234[gene=ENSMUSG00000020783][PH=4][PH0=0.07][P=3.1e-03]	4	+	3	ENSMUSG00000020783	1200014J11Rik	3'UTR	protein_coding	KNOWN	NA	NA	no
chr11	73079481	73079541	65222[gene=ENSMUSG00000020783][PH=4][PH0=0.07][P=3.1e-03]	4	+	3	ENSMUSG00000020783	1200014J11Rik	3'UTR	protein_coding	KNOWN	NA	NA	no
chr11	72992799	72992859	65099[gene=ENSMUSG00000020788][PH=5][PH0=0.04][P=3.1e-06]	5	+	4	ENSMUSG00000020788	Atp2a3	3'UTR	protein_coding	KNOWN	NA	NA	no
chr11	72768874	72768934	64598[gene=ENSMUSG00000020790][PH=5][PH0=0.09][P=4.4e-04]	5	+	3	ENSMUSG00000020790	Ankfy1	3'UTR	protein_coding	KNOWN	NA	NA	yes
chr11	72684045	72684105	64195[gene=ENSMUSG00000020794][PH=6][PH0=0.23][P=2.3e-03]	6	+	4	ENSMUSG00000020794	Ube2g1	3'UTR	protein_coding	KNOWN	NA	NA	no
chr11	72622480	72622540	63511[gene=ENSMUSG00000020794][PH=6][PH0=0.23][P=2.3e-03]	6	+	2	ENSMUSG00000020794	Ube2g1	intron	protein_coding	KNOWN	NA	NA	no
chr11	72209736	72209796	62961[gene=ENSMUSG00000020803][PH=7][PH0=0.08][P=7.4e-09]	7	+	3	ENSMUSG00000020803	Txndc17	3'UTR	protein_coding	KNOWN	NA	NA	yes
chr11	116598197	116598257	111312[gene=ENSMUSG00000020806][PH=16][PH0=0.16][P=1.1e-13]	16	-	4	ENSMUSG00000020806	Rhbdf2	3'UTR	protein_coding	KNOWN	NA	NA	no
chr11	116674619	116674679	101712[gene=ENSMUSG00000075410][PH=241][PH0=0.57][P=1.4e-13]	241	+	4	ENSMUSG00000020812	1810032O08Rik	3'UTR|intron	protein_coding	NOVEL	NA	NA	yes
chr11	116674180	116674240	101663[gene=ENSMUSG00000075410][PH=81][PH0=0.57][P=1.4e-13]	81	+	4	ENSMUSG00000020812	1810032O08Rik	3'UTR|intron	protein_coding	NOVEL	NA	NA	yes
chr11	70940531	70940591	62803[gene=ENSMUSG00000020817][PH=18][PH0=0.15][P=1.0e-100]	18	+	4	ENSMUSG00000020817	Rabep1	3'UTR	protein_coding	KNOWN	NA	NA	yes
chr11	117159218	117159278	102092[gene=ENSMUSG00000020823][PH=4][PH0=0.07][P=6.2e-03]	4	+	3	ENSMUSG00000020823	Sec14l1	3'UTR	protein_coding	KNOWN	NA	NA	no
chr11	117147137	117147197	102017[gene=ENSMUSG00000020823][PH=4][PH0=0.07][P=6.2e-03]	4	+	3	ENSMUSG00000020823	Sec14l1	CDS	protein_coding	KNOWN	NA	NA	no
chr11	70235195	70235255	45660[gene=ENSMUSG00000020831][PH=4][PH0=0.01][P=1.2e-06]	4	-	3	ENSMUSG00000020831	0610010K14Rik	3'UTR	protein_coding	KNOWN	NA	NA	no
chr11	78073413	78073473	50342[gene=ENSMUSG00000020832][PH=3][PH0=0.03][P=5.6e-03]	3	-	2	ENSMUSG00000020832	Eral1	3'UTR	protein_coding	KNOWN	NA	NA	no
chr11	76778644	76778704	49251[gene=ENSMUSG00000020841][PH=5][PH0=0.10][P=8.2e-04]	5	-	2	ENSMUSG00000020841	Cpd	3'UTR	protein_coding	KNOWN	NA	NA	no
chr11	75765213	75765273	69637[gene=ENSMUSG00000020849][PH=10][PH0=0.45][P=5.9e-07]	10	+	2	ENSMUSG00000020849	Ywhae	3'UTR	protein_coding	KNOWN	NA	NA	no
chr11	75764837	75764897	69577[gene=ENSMUSG00000020849][PH=25][PH0=0.45][P=1.0e-100]	25	+	4	ENSMUSG00000020849	Ywhae	3'UTR	protein_coding	KNOWN	NA	NA	yes
chr11	75765515	75765575	69677[gene=ENSMUSG00000020849][PH=19][PH0=0.45][P=1.0e-100]	19	+	4	ENSMUSG00000020849	Ywhae	3'UTR	protein_coding	KNOWN	NA	NA	yes
chr11	75765131	75765191	69621[gene=ENSMUSG00000020849][PH=9][PH0=0.45][P=1.2e-05]	9	+	3	ENSMUSG00000020849	Ywhae	3'UTR	protein_coding	KNOWN	NA	NA	yes
chr11	75765791	75765851	69714[gene=ENSMUSG00000020849][PH=7][PH0=0.45][P=3.3e-03]	7	+	3	ENSMUSG00000020849	Ywhae	3'UTR	protein_coding	KNOWN	NA	NA	no
chr11	75506692	75506752	67817[gene=ENSMUSG00000020850][PH=5][PH0=0.17][P=4.5e-03]	5	+	4	ENSMUSG00000020850	Prpf8	CDS	protein_coding	KNOWN	NA	NA	yes
chr11	94123410	94123470	87330[gene=ENSMUSG00000020859][PH=11][PH0=0.26][P=2.9e-10]	11	+	4	ENSMUSG00000020859	Spag9	3'UTR	protein_coding	KNOWN	NA	NA	no
chr11	94123173	94123233	87293[gene=ENSMUSG00000020859][PH=7][PH0=0.26][P=3.1e-04]	7	+	4	ENSMUSG00000020859	Spag9	3'UTR	protein_coding	KNOWN	NA	NA	no
chr11	94125992	94126052	87523[gene=ENSMUSG00000020859][PH=20][PH0=0.26][P=4.0e-13]	20	+	4	ENSMUSG00000020859	Spag9	3'UTR	protein_coding	KNOWN	NA	NA	yes
chr11	94123038	94123098	87271[gene=ENSMUSG00000020859][PH=9][PH0=0.26][P=3.8e-07]	9	+	3	ENSMUSG00000020859	Spag9	3'UTR	protein_coding	KNOWN	NA	NA	no
chr11	94125801	94125861	87488[gene=ENSMUSG00000020859][PH=8][PH0=0.26][P=1.2e-05]	8	+	4	ENSMUSG00000020859	Spag9	3'UTR	protein_coding	KNOWN	NA	NA	no
chr11	94291395	94291455	71419[gene=ENSMUSG00000020863][PH=16][PH0=0.31][P=2.5e-13]	16	-	4	ENSMUSG00000020863	Luc7l3	3'UTR	protein_coding	KNOWN	NA	NA	yes
chr11	94317704	94317764	71899[gene=ENSMUSG00000020863][PH=6][PH0=0.31][P=5.9e-03]	6	-	3	ENSMUSG00000020863	Luc7l3	intron	protein_coding	KNOWN	NA	NA	no
chr11	94291499	94291559	71441[gene=ENSMUSG00000020863][PH=6][PH0=0.31][P=5.9e-03]	6	-	3	ENSMUSG00000020863	Luc7l3	3'UTR|CDS	protein_coding	KNOWN	NA	NA	no
chr11	94643987	94644047	87775[gene=ENSMUSG00000020869][PH=5][PH0=0.12][P=4.8e-04]	5	+	4	ENSMUSG00000020869	Lrrc59	3'UTR	protein_coding	KNOWN	NA	NA	no
chr11	95391559	95391619	88458[gene=ENSMUSG00000038893][PH=7][PH0=0.16][P=4.7e-06]	7	+	3	ENSMUSG00000020873	Slc35b1	3'UTR	protein_coding	KNOWN	NA	NA	yes
chr11	70045475	70045535	61520[gene=ENSMUSG00000020886][PH=13][PH0=0.10][P=1.0e-100]	13	+	4	ENSMUSG00000020886	Dlg4	3'UTR	protein_coding	KNOWN	NA	NA	yes
chr11	70044796	70044856	61481[gene=ENSMUSG00000020886][PH=17][PH0=0.10][P=1.0e-100]	17	+	4	ENSMUSG00000020886	Dlg4	3'UTR	protein_coding	KNOWN	NA	NA	yes
chr11	70033732	70033792	61413[gene=ENSMUSG00000020886][PH=7][PH0=0.10][P=1.3e-07]	7	+	3	ENSMUSG00000020886	Dlg4	intron	protein_coding	KNOWN	NA	NA	no
chr11	69109709	69109769	60731[gene=ENSMUSG00000020893][PH=11][PH0=0.24][P=1.8e-11]	11	+	4	ENSMUSG00000020893	Per1	3'UTR	protein_coding	KNOWN	NA	NA	no
chr11	69109907	69109967	60756[gene=ENSMUSG00000020893][PH=19][PH0=0.24][P=1.4e-13]	19	+	4	ENSMUSG00000020893	Per1	3'UTR	protein_coding	KNOWN	NA	NA	yes
chr11	69090799	69090859	60596[gene=ENSMUSG00000020894][PH=4][PH0=0.12][P=9.9e-03]	4	+	2	ENSMUSG00000020894	Vamp2	3'UTR	protein_coding	KNOWN	NA	NA	yes
chr11	69051561	69051621	60414[gene=ENSMUSG00000020897][PH=4][PH0=0.06][P=8.8e-04]	4	+	3	ENSMUSG00000020897	Aurkb	3'UTR	protein_coding	KNOWN	NA	NA	no
chr11	68985837	68985897	43178[gene=ENSMUSG00000020899][PH=12][PH0=0.09][P=1.0e-100]	12	-	3	ENSMUSG00000020899	Pfas	3'UTR	protein_coding	KNOWN	NA	NA	yes
chr11	67041938	67041998	42771[gene=ENSMUSG00000020910][PH=5][PH0=0.12][P=5.1e-04]	5	-	2	ENSMUSG00000020910	Adprm	CDS	protein_coding	KNOWN	NA	NA	yes
chr11	99014735	99014795	79092[gene=ENSMUSG00000065262][PH=5][PH0=0.22][P=3.9e-03]	5	-	3	ENSMUSG00000020914	Top2a	CDS	protein_coding	KNOWN	NA	NA	no
chr11	98992938	98992998	78774[gene=ENSMUSG00000020914][PH=45][PH0=0.25][P=1.0e-100]	45	-	4	ENSMUSG00000020914	Top2a	3'UTR	protein_coding	KNOWN	NA	NA	yes
chr11	98993471	98993531	78862[gene=ENSMUSG00000020914][PH=10][PH0=0.25][P=1.9e-09]	10	-	3	ENSMUSG00000020914	Top2a	downstream 10K|intron	protein_coding	KNOWN	NA	NA	no
chr11	98993220	98993280	78826[gene=ENSMUSG00000020914][PH=6][PH0=0.25][P=1.5e-03]	6	-	3	ENSMUSG00000020914	Top2a	3'UTR	protein_coding	KNOWN	NA	NA	yes
chr11	98993330	98993390	78842[gene=ENSMUSG00000020914][PH=8][PH0=0.25][P=2.2e-06]	8	-	4	ENSMUSG00000020914	Top2a	3'UTR|intron	protein_coding	KNOWN	NA	NA	no
chr11	100476344	100476404	79615[gene=ENSMUSG00000020917][PH=10][PH0=1.02][P=1.7e-03]	10	-	3	ENSMUSG00000020917	Acly	3'UTR	protein_coding	KNOWN	NA	NA	no
chr11	100510989	100511049	81596[gene=ENSMUSG00000020917][PH=10][PH0=1.02][P=1.7e-03]	10	-	2	ENSMUSG00000020917	Acly	intron	protein_coding	KNOWN	NA	NA	no
chr11	100504215	100504275	81227[gene=ENSMUSG00000020917][PH=13][PH0=1.02][P=1.4e-06]	13	-	3	ENSMUSG00000020917	Acly	CDS	protein_coding	KNOWN	NA	NA	no
chr11	100477001	100477061	79875[gene=ENSMUSG00000020917][PH=56][PH0=1.02][P=1.0e-100]	56	-	4	ENSMUSG00000020917	Acly	3'UTR	protein_coding	KNOWN	NA	NA	yes
chr11	100476935	100476995	79836[gene=ENSMUSG00000020917][PH=25][PH0=1.02][P=1.0e-100]	25	-	4	ENSMUSG00000020917	Acly	3'UTR	protein_coding	KNOWN	NA	NA	yes
chr11	100476814	100476874	79790[gene=ENSMUSG00000020917][PH=24][PH0=1.02][P=1.0e-100]	24	-	4	ENSMUSG00000020917	Acly	3'UTR	protein_coding	KNOWN	NA	NA	yes
chr11	100476667	100476727	79722[gene=ENSMUSG00000020917][PH=34][PH0=1.02][P=1.0e-100]	34	-	4	ENSMUSG00000020917	Acly	3'UTR	protein_coding	KNOWN	NA	NA	yes
chr11	100476528	100476588	79663[gene=ENSMUSG00000020917][PH=18][PH0=1.02][P=2.3e-12]	18	-	4	ENSMUSG00000020917	Acly	3'UTR	protein_coding	KNOWN	NA	NA	no
chr11	100502106	100502166	81101[gene=ENSMUSG00000020917][PH=20][PH0=1.02][P=1.0e-100]	20	-	3	ENSMUSG00000020917	Acly	intron	protein_coding	KNOWN	NA	NA	no
chr11	100502337	100502397	81133[gene=ENSMUSG00000020917][PH=11][PH0=1.02][P=1.8e-04]	11	-	3	ENSMUSG00000020917	Acly	intron	protein_coding	KNOWN	NA	NA	no
chr11	100499900	100499960	80930[gene=ENSMUSG00000020917][PH=11][PH0=1.02][P=1.8e-04]	11	-	4	ENSMUSG00000020917	Acly	downstream 10K|intron	protein_coding	KNOWN	NA	NA	no
chr11	100787027	100787087	83256[gene=ENSMUSG00000020919][PH=8][PH0=0.53][P=1.3e-03]	8	-	3	ENSMUSG00000020919	Stat5b	intron	protein_coding	KNOWN	NA	NA	no
chr11	100780756	100780816	83032[gene=ENSMUSG00000020919][PH=8][PH0=0.53][P=1.3e-03]	8	-	2	ENSMUSG00000020919	Stat5b	3'UTR	protein_coding	KNOWN	NA	NA	no
chr11	100780721	100780781	83026[gene=ENSMUSG00000020919][PH=9][PH0=0.53][P=8.8e-05]	9	-	4	ENSMUSG00000020919	Stat5b	3'UTR	protein_coding	KNOWN	NA	NA	no
chr11	100781497	100781557	83097[gene=ENSMUSG00000020919][PH=26][PH0=0.53][P=1.0e-100]	26	-	4	ENSMUSG00000020919	Stat5b	3'UTR	protein_coding	KNOWN	NA	NA	yes
chr11	100846519	100846579	84781[gene=ENSMUSG00000020919][PH=8][PH0=0.53][P=1.3e-03]	8	-	3	ENSMUSG00000020919	Stat5b	intron	protein_coding	KNOWN	NA	NA	no
chr11	100781568	100781628	83119[gene=ENSMUSG00000020919][PH=9][PH0=0.53][P=8.8e-05]	9	-	3	ENSMUSG00000020919	Stat5b	3'UTR	protein_coding	KNOWN	NA	NA	yes
chr11	100782044	100782104	83143[gene=ENSMUSG00000020919][PH=10][PH0=0.53][P=5.2e-06]	10	-	3	ENSMUSG00000020919	Stat5b	3'UTR	protein_coding	KNOWN	NA	NA	no
chr11	100849692	100849752	84971[gene=ENSMUSG00000020919][PH=8][PH0=0.53][P=1.3e-03]	8	-	2	ENSMUSG00000020919	Stat5b	intron	protein_coding	KNOWN	NA	NA	no
chr11	100780804	100780864	83044[gene=ENSMUSG00000020919][PH=9][PH0=0.53][P=8.8e-05]	9	-	2	ENSMUSG00000020919	Stat5b	3'UTR	protein_coding	KNOWN	NA	NA	yes
chr11	100822134	100822194	83863[gene=ENSMUSG00000020919][PH=8][PH0=0.53][P=1.3e-03]	8	-	3	ENSMUSG00000020919	Stat5b	5'UTR|intron	protein_coding	KNOWN	NA	NA	no
chr11	100808386	100808446	83580[gene=ENSMUSG00000020919][PH=8][PH0=0.53][P=1.3e-03]	8	-	3	ENSMUSG00000020919	Stat5b	CDS	protein_coding	KNOWN	NA	NA	yes
chr11	100842837	100842897	84632[gene=ENSMUSG00000020919][PH=8][PH0=0.53][P=1.3e-03]	8	-	3	ENSMUSG00000020919	Stat5b	intron	protein_coding	KNOWN	NA	NA	no
chr11	102163663	102163723	86346[gene=ENSMUSG00000020922][PH=5][PH0=0.19][P=7.4e-03]	5	-	3	ENSMUSG00000020922	Lsm12	3'UTR	protein_coding	KNOWN	NA	NA	no
chr11	102183711	102183771	86546[gene=ENSMUSG00000020922][PH=5][PH0=0.19][P=7.4e-03]	5	-	2	ENSMUSG00000020922	Lsm12	intron	protein_coding	KNOWN	NA	NA	no
chr11	102162569	102162629	86292[gene=ENSMUSG00000020922][PH=18][PH0=0.19][P=1.0e-100]	18	-	4	ENSMUSG00000020922	Lsm12	3'UTR	protein_coding	KNOWN	NA	NA	yes
chr11	102305981	102306041	86683[gene=ENSMUSG00000020923][PH=8][PH0=0.13][P=8.5e-09]	8	-	3	ENSMUSG00000020923	Ubtf	3'UTR	protein_coding	KNOWN	NA	NA	no
chr11	102877635	102877695	87516[gene=ENSMUSG00000020932][PH=3][PH0=0.01][P=6.9e-04]	3	-	2	ENSMUSG00000020929	Eftud2	CDS|downstream 10K	protein_coding	KNOWN	NA	NA	no
chr11	103052054	103052114	95781[gene=ENSMUSG00000097410][PH=3][PH0=0.02][P=9.9e-03]	3	+	2	ENSMUSG00000020936	Nmt1	intron	protein_coding	KNOWN	NA	NA	no
chr12	65066710	65066770	18693[gene=ENSMUSG00000020949][PH=4][PH0=0.10][P=8.1e-03]	4	-	2	ENSMUSG00000020949	Fkbp3	CDS	protein_coding	KNOWN	NA	NA	no
chr12	65069991	65070051	18718[gene=ENSMUSG00000020949][PH=7][PH0=0.10][P=6.9e-08]	7	-	2	ENSMUSG00000020949	Fkbp3	CDS	protein_coding	KNOWN	NA	NA	yes
chr12	51390344	51390404	19069[gene=ENSMUSG00000020952][PH=7][PH0=0.07][P=2.9e-08]	7	+	3	ENSMUSG00000020952	Scfd1	CDS	protein_coding	KNOWN	NA	NA	no
chr12	51609437	51609497	8438[gene=ENSMUSG00000020954][PH=6][PH0=0.28][P=7.3e-03]	6	-	2	ENSMUSG00000020954	Strn3	3'UTR	protein_coding	KNOWN	NA	NA	no
chr12	51609183	51609243	8417[gene=ENSMUSG00000020954][PH=6][PH0=0.28][P=7.3e-03]	6	-	3	ENSMUSG00000020954	Strn3	3'UTR	protein_coding	KNOWN	NA	NA	no
chr12	51609096	51609156	8392[gene=ENSMUSG00000020954][PH=17][PH0=0.28][P=1.0e-100]	17	-	4	ENSMUSG00000020954	Strn3	3'UTR	protein_coding	KNOWN	NA	NA	yes
chr12	91573413	91573473	28857[gene=ENSMUSG00000020962][PH=12][PH0=0.11][P=1.0e-100]	12	-	2	ENSMUSG00000020962	Gtf2a1	intron	protein_coding	KNOWN	NA	NA	yes
chr12	69303863	69303923	22662[gene=ENSMUSG00000020978][PH=5][PH0=0.09][P=1.6e-04]	5	+	3	ENSMUSG00000020978	Klhdc2	CDS	protein_coding	KNOWN	NA	NA	no
chr12	59072985	59073045	20574[gene=ENSMUSG00000020994][PH=29][PH0=0.28][P=1.0e-100]	29	+	4	ENSMUSG00000020994	Pnn	3'UTR	protein_coding	KNOWN	NA	NA	yes
chr12	59190018	59190078	21319[gene=ENSMUSG00000021000][PH=8][PH0=0.20][P=8.1e-07]	8	+	4	ENSMUSG00000021000	Ctage5	3'UTR	protein_coding	KNOWN	NA	NA	yes
chr12	53464509	53464569	19587[gene=ENSMUSG00000021010][PH=2][PH0=0.00][P=1.9e-04]	2	+	2	ENSMUSG00000021010	Npas3	intron	protein_coding	KNOWN	NA	NA	no
chr12	55489851	55489911	16596[gene=ENSMUSG00000021025][PH=36][PH0=3.16][P=1.0e-100]	36	-	4	ENSMUSG00000021025	Nfkbia	3'UTR	protein_coding	KNOWN	NA	NA	yes
chr12	55489572	55489632	16472[gene=ENSMUSG00000021025][PH=205][PH0=3.16][P=1.0e-100]	205	-	4	ENSMUSG00000021025	Nfkbia	3'UTR	protein_coding	KNOWN	NA	NA	yes
chr12	55489698	55489758	16545[gene=ENSMUSG00000021025][PH=21][PH0=3.16][P=1.5e-07]	21	-	4	ENSMUSG00000021025	Nfkbia	3'UTR	protein_coding	KNOWN	NA	NA	no
chr12	55489398	55489458	16340[gene=ENSMUSG00000021025][PH=513][PH0=3.16][P=1.0e-100]	513	-	4	ENSMUSG00000021025	Nfkbia	3'UTR	protein_coding	KNOWN	NA	NA	yes
chr12	55712240	55712300	17270[gene=ENSMUSG00000021027][PH=5][PH0=0.08][P=7.9e-04]	5	-	4	ENSMUSG00000021027	Ralgapa1	intron	protein_coding	KNOWN	NA	NA	yes
chr12	75571226	75571286	22216[gene=ENSMUSG00000021051][PH=5][PH0=0.12][P=3.4e-03]	5	-	2	ENSMUSG00000021051	Ppp2r5e	intron	protein_coding	KNOWN	NA	NA	no
chr12	75453272	75453332	21597[gene=ENSMUSG00000021051][PH=5][PH0=0.12][P=3.4e-03]	5	-	2	ENSMUSG00000021051	Ppp2r5e	3'UTR	protein_coding	KNOWN	NA	NA	no
chr12	75714255	75714315	22619[gene=ENSMUSG00000021054][PH=4][PH0=0.08][P=6.1e-03]	4	-	3	ENSMUSG00000021054	Sgpp1	3'UTR	protein_coding	KNOWN	NA	NA	no
chr12	75714852	75714912	22650[gene=ENSMUSG00000021054][PH=4][PH0=0.08][P=6.1e-03]	4	-	2	ENSMUSG00000021054	Sgpp1	3'UTR	protein_coding	KNOWN	NA	NA	no
chr12	75714774	75714834	22641[gene=ENSMUSG00000021054][PH=5][PH0=0.08][P=1.3e-04]	5	-	2	ENSMUSG00000021054	Sgpp1	3'UTR	protein_coding	KNOWN	NA	NA	no
chr12	75715163	75715223	22663[gene=ENSMUSG00000021054][PH=5][PH0=0.08][P=1.3e-04]	5	-	3	ENSMUSG00000021054	Sgpp1	3'UTR	protein_coding	KNOWN	NA	NA	yes
chr12	75714802	75714862	22645[gene=ENSMUSG00000021054][PH=5][PH0=0.08][P=1.3e-04]	5	-	3	ENSMUSG00000021054	Sgpp1	3'UTR	protein_coding	KNOWN	NA	NA	no
chr12	70467227	70467287	23450[gene=ENSMUSG00000021072][PH=8][PH0=0.15][P=2.4e-08]	8	+	3	ENSMUSG00000021072	Tmx1	3'UTR	protein_coding	KNOWN	NA	NA	yes
chr12	70466566	70466626	23398[gene=ENSMUSG00000021072][PH=5][PH0=0.15][P=1.6e-03]	5	+	3	ENSMUSG00000021072	Tmx1	3'UTR	protein_coding	KNOWN	NA	NA	no
chr12	70466385	70466445	23364[gene=ENSMUSG00000021072][PH=11][PH0=0.15][P=2.1e-13]	11	+	4	ENSMUSG00000021072	Tmx1	3'UTR	protein_coding	KNOWN	NA	NA	no
chr12	70466977	70467037	23425[gene=ENSMUSG00000021072][PH=7][PH0=0.15][P=1.1e-06]	7	+	4	ENSMUSG00000021072	Tmx1	3'UTR	protein_coding	KNOWN	NA	NA	yes
chr12	71133284	71133344	21265[gene=ENSMUSG00000021079][PH=6][PH0=0.25][P=8.7e-04]	6	-	3	ENSMUSG00000021079	Timm9	intron	protein_coding	KNOWN	NA	NA	no
chr12	71134443	71134503	21305[gene=ENSMUSG00000021079][PH=6][PH0=0.25][P=8.7e-04]	6	-	4	ENSMUSG00000021079	Timm9	intron	protein_coding	KNOWN	NA	NA	no
chr12	72788399	72788459	25810[gene=ENSMUSG00000021096][PH=5][PH0=0.14][P=2.0e-03]	5	+	2	ENSMUSG00000021096	Ppm1a	intron	protein_coding	KNOWN	NA	NA	no
chr12	72793923	72793983	25878[gene=ENSMUSG00000021096][PH=5][PH0=0.14][P=2.0e-03]	5	+	2	ENSMUSG00000021096	Ppm1a	3'UTR	protein_coding	KNOWN	NA	NA	no
chr12	73778129	73778189	33368[gene=ENSMUSG00000021108][PH=9][PH0=0.66][P=1.5e-03]	9	+	4	ENSMUSG00000021108	Prkch	3'UTR	protein_coding	KNOWN	NA	NA	yes
chr12	73616011	73616071	28618[gene=ENSMUSG00000021108][PH=9][PH0=0.66][P=1.5e-03]	9	+	2	ENSMUSG00000021108	Prkch	intron	protein_coding	KNOWN	NA	NA	no
chr12	73606369	73606429	28167[gene=ENSMUSG00000021108][PH=11][PH0=0.66][P=7.5e-06]	11	+	2	ENSMUSG00000021108	Prkch	intron	protein_coding	KNOWN	NA	NA	no
chr12	73618388	73618448	28751[gene=ENSMUSG00000021108][PH=15][PH0=0.66][P=6.1e-11]	15	+	3	ENSMUSG00000021108	Prkch	intron	protein_coding	KNOWN	NA	NA	yes
chr12	73778117	73778177	33364[gene=ENSMUSG00000021108][PH=9][PH0=0.66][P=1.5e-03]	9	+	3	ENSMUSG00000021108	Prkch	3'UTR	protein_coding	KNOWN	NA	NA	yes
chr12	73777657	73777717	33262[gene=ENSMUSG00000021108][PH=32][PH0=0.66][P=5.8e-13]	32	+	4	ENSMUSG00000021108	Prkch	3'UTR	protein_coding	KNOWN	NA	NA	yes
chr12	73760014	73760074	32713[gene=ENSMUSG00000021108][PH=14][PH0=0.66][P=1.3e-09]	14	+	3	ENSMUSG00000021108	Prkch	intron	protein_coding	KNOWN	NA	NA	yes
chr12	73591211	73591271	27419[gene=ENSMUSG00000021108][PH=10][PH0=0.66][P=1.1e-04]	10	+	3	ENSMUSG00000021108	Prkch	intron	protein_coding	KNOWN	NA	NA	yes
chr12	73778037	73778097	33338[gene=ENSMUSG00000021108][PH=26][PH0=0.66][P=5.8e-13]	26	+	4	ENSMUSG00000021108	Prkch	3'UTR	protein_coding	KNOWN	NA	NA	yes
chr12	73615990	73616050	28612[gene=ENSMUSG00000021108][PH=9][PH0=0.66][P=1.5e-03]	9	+	3	ENSMUSG00000021108	Prkch	intron	protein_coding	KNOWN	NA	NA	yes
chr12	73586640	73586700	27043[gene=ENSMUSG00000021108][PH=12][PH0=0.66][P=4.5e-07]	12	+	4	ENSMUSG00000021108	Prkch	intron	protein_coding	KNOWN	NA	NA	yes
chr12	73946617	73946677	36499[gene=ENSMUSG00000021109][PH=11][PH0=1.51][P=6.8e-03]	11	+	3	ENSMUSG00000021109	Hif1a	3'UTR	protein_coding	KNOWN	NA	NA	no
chr12	73930688	73930748	35125[gene=ENSMUSG00000021109][PH=12][PH0=1.51][P=9.4e-04]	12	+	2	ENSMUSG00000021109	Hif1a	CDS	protein_coding	KNOWN	NA	NA	no
chr12	73947069	73947129	36615[gene=ENSMUSG00000021109][PH=15][PH0=1.51][P=1.5e-06]	15	+	4	ENSMUSG00000021109	Hif1a	3'UTR	protein_coding	KNOWN	NA	NA	yes
chr12	73926692	73926752	34845[gene=ENSMUSG00000021109][PH=12][PH0=1.51][P=9.4e-04]	12	+	4	ENSMUSG00000021109	Hif1a	CDS	protein_coding	KNOWN	NA	NA	yes
chr12	73945810	73945870	36116[gene=ENSMUSG00000021109][PH=150][PH0=1.51][P=1.0e-100]	150	+	4	ENSMUSG00000021109	Hif1a	3'UTR	protein_coding	KNOWN	NA	NA	yes
chr12	73946339	73946399	36397[gene=ENSMUSG00000021109][PH=16][PH0=1.51][P=1.5e-07]	16	+	4	ENSMUSG00000021109	Hif1a	3'UTR	protein_coding	KNOWN	NA	NA	yes
chr12	73928079	73928139	34901[gene=ENSMUSG00000021109][PH=11][PH0=1.51][P=6.8e-03]	11	+	2	ENSMUSG00000021109	Hif1a	CDS	protein_coding	KNOWN	NA	NA	no
chr12	73946418	73946478	36427[gene=ENSMUSG00000021109][PH=16][PH0=1.51][P=1.5e-07]	16	+	4	ENSMUSG00000021109	Hif1a	3'UTR	protein_coding	KNOWN	NA	NA	yes
chr12	73946505	73946565	36462[gene=ENSMUSG00000021109][PH=20][PH0=1.51][P=8.6e-12]	20	+	4	ENSMUSG00000021109	Hif1a	3'UTR	protein_coding	KNOWN	NA	NA	yes
chr12	73946035	73946095	36258[gene=ENSMUSG00000021109][PH=120][PH0=1.51][P=1.0e-100]	120	+	4	ENSMUSG00000021109	Hif1a	3'UTR	protein_coding	KNOWN	NA	NA	yes
chr12	73946278	73946338	36370[gene=ENSMUSG00000021109][PH=26][PH0=1.51][P=1.0e-100]	26	+	3	ENSMUSG00000021109	Hif1a	3'UTR	protein_coding	KNOWN	NA	NA	yes
chr12	73946447	73946507	36441[gene=ENSMUSG00000021109][PH=13][PH0=1.51][P=1.2e-04]	13	+	3	ENSMUSG00000021109	Hif1a	3'UTR	protein_coding	KNOWN	NA	NA	yes
chr12	73946837	73946897	36554[gene=ENSMUSG00000021109][PH=20][PH0=1.51][P=8.6e-12]	20	+	4	ENSMUSG00000021109	Hif1a	3'UTR	protein_coding	KNOWN	NA	NA	yes
chr12	73945588	73945648	36066[gene=ENSMUSG00000021109][PH=11][PH0=1.51][P=6.8e-03]	11	+	4	ENSMUSG00000021109	Hif1a	CDS	protein_coding	KNOWN	NA	NA	yes
chr12	73940410	73940470	35666[gene=ENSMUSG00000021109][PH=20][PH0=1.51][P=8.6e-12]	20	+	4	ENSMUSG00000021109	Hif1a	CDS|downstream 10K	protein_coding	KNOWN	NA	NA	yes
chr12	73946128	73946188	36328[gene=ENSMUSG00000021109][PH=11][PH0=1.51][P=6.8e-03]	11	+	3	ENSMUSG00000021109	Hif1a	3'UTR	protein_coding	KNOWN	NA	NA	yes
chr12	105809849	105809909	51760[gene=ENSMUSG00000021111][PH=6][PH0=0.30][P=6.4e-03]	6	+	2	ENSMUSG00000021111	Papola	downstream 10K|intron	protein_coding	KNOWN	NA	NA	no
chr12	105837566	105837626	52176[gene=ENSMUSG00000021111][PH=13][PH0=0.30][P=1.0e-100]	13	+	4	ENSMUSG00000021111	Papola	3'UTR|intron	protein_coding	KNOWN	NA	NA	yes
chr12	105789039	105789099	51433[gene=ENSMUSG00000041323][PH=5][PH0=0.04][P=1.1e-05]	5	+	2	ENSMUSG00000021111	Papola	downstream 10K|intron	protein_coding	KNOWN	NA	NA	no
chr12	105837743	105837803	52193[gene=ENSMUSG00000021111][PH=7][PH0=0.30][P=3.2e-04]	7	+	3	ENSMUSG00000021111	Papola	3'UTR|intron	protein_coding	KNOWN	NA	NA	no
chr12	78809568	78809628	40003[gene=ENSMUSG00000021112][PH=4][PH0=0.06][P=4.8e-03]	4	+	2	ENSMUSG00000021112	Mpp5	intron	protein_coding	KNOWN	NA	NA	no
chr12	78843266	78843326	23391[gene=ENSMUSG00000021114][PH=4][PH0=0.07][P=2.8e-03]	4	-	3	ENSMUSG00000021114	Atp6v1d	3'UTR	protein_coding	KNOWN	NA	NA	no
chr12	78843175	78843235	23381[gene=ENSMUSG00000021114][PH=6][PH0=0.07][P=7.2e-07]	6	-	3	ENSMUSG00000021114	Atp6v1d	3'UTR	protein_coding	KNOWN	NA	NA	no
chr12	78857286	78857346	23451[gene=ENSMUSG00000021114][PH=5][PH0=0.07][P=5.1e-05]	5	-	2	ENSMUSG00000021114	Atp6v1d	CDS	protein_coding	KNOWN	NA	NA	no
chr12	78843326	78843386	23399[gene=ENSMUSG00000021114][PH=4][PH0=0.07][P=2.8e-03]	4	-	3	ENSMUSG00000021114	Atp6v1d	3'UTR	protein_coding	KNOWN	NA	NA	no
chr12	79170091	79170151	23659[gene=ENSMUSG00000021124][PH=5][PH0=0.10][P=2.3e-04]	5	-	3	ENSMUSG00000021124	Vti1b	downstream 10K|intron	protein_coding	KNOWN	NA	NA	no
chr12	80108178	80108238	23978[gene=ENSMUSG00000021127][PH=255][PH0=1.53][P=4.3e-14]	255	-	4	ENSMUSG00000021127	Zfp36l1	3'UTR	protein_coding	KNOWN	NA	NA	yes
chr12	80109236	80109296	24181[gene=ENSMUSG00000021127][PH=15][PH0=1.53][P=5.2e-07]	15	-	4	ENSMUSG00000021127	Zfp36l1	3'UTR	protein_coding	KNOWN	NA	NA	no
chr12	80108009	80108069	23906[gene=ENSMUSG00000021127][PH=40][PH0=1.53][P=4.3e-14]	40	-	4	ENSMUSG00000021127	Zfp36l1	3'UTR	protein_coding	KNOWN	NA	NA	yes
chr12	80107770	80107830	23857[gene=ENSMUSG00000021127][PH=17][PH0=1.53][P=5.2e-09]	17	-	4	ENSMUSG00000021127	Zfp36l1	3'UTR	protein_coding	KNOWN	NA	NA	yes
chr12	80108387	80108447	24099[gene=ENSMUSG00000021127][PH=47][PH0=1.53][P=4.3e-14]	47	-	4	ENSMUSG00000021127	Zfp36l1	3'UTR	protein_coding	KNOWN	NA	NA	yes
chr12	80112878	80112938	24288[gene=ENSMUSG00000097729][PH=4][PH0=0.07][P=1.7e-03]	4	-	3	ENSMUSG00000021127	Zfp36l1	5'UTR	protein_coding	KNOWN	NA	NA	no
chr12	80880760	80880820	42000[gene=ENSMUSG00000021133][PH=19][PH0=0.14][P=1.0e-100]	19	+	4	ENSMUSG00000021133	4933426M11Rik	3'UTR	protein_coding	KNOWN	NA	NA	yes
chr12	80878619	80878679	41942[gene=ENSMUSG00000021133][PH=5][PH0=0.14][P=4.7e-03]	5	+	4	ENSMUSG00000021133	4933426M11Rik	3'UTR	protein_coding	KNOWN	NA	NA	yes
[truncated: 9,102 more rows]
