# Supplementary figures and images for: ZFP36 RNA-binding proteins restrain T cell activation and anti-viral immunity
Source: eLife journal article supplement (doi:10.7554/elife.33057), 2018-05-31

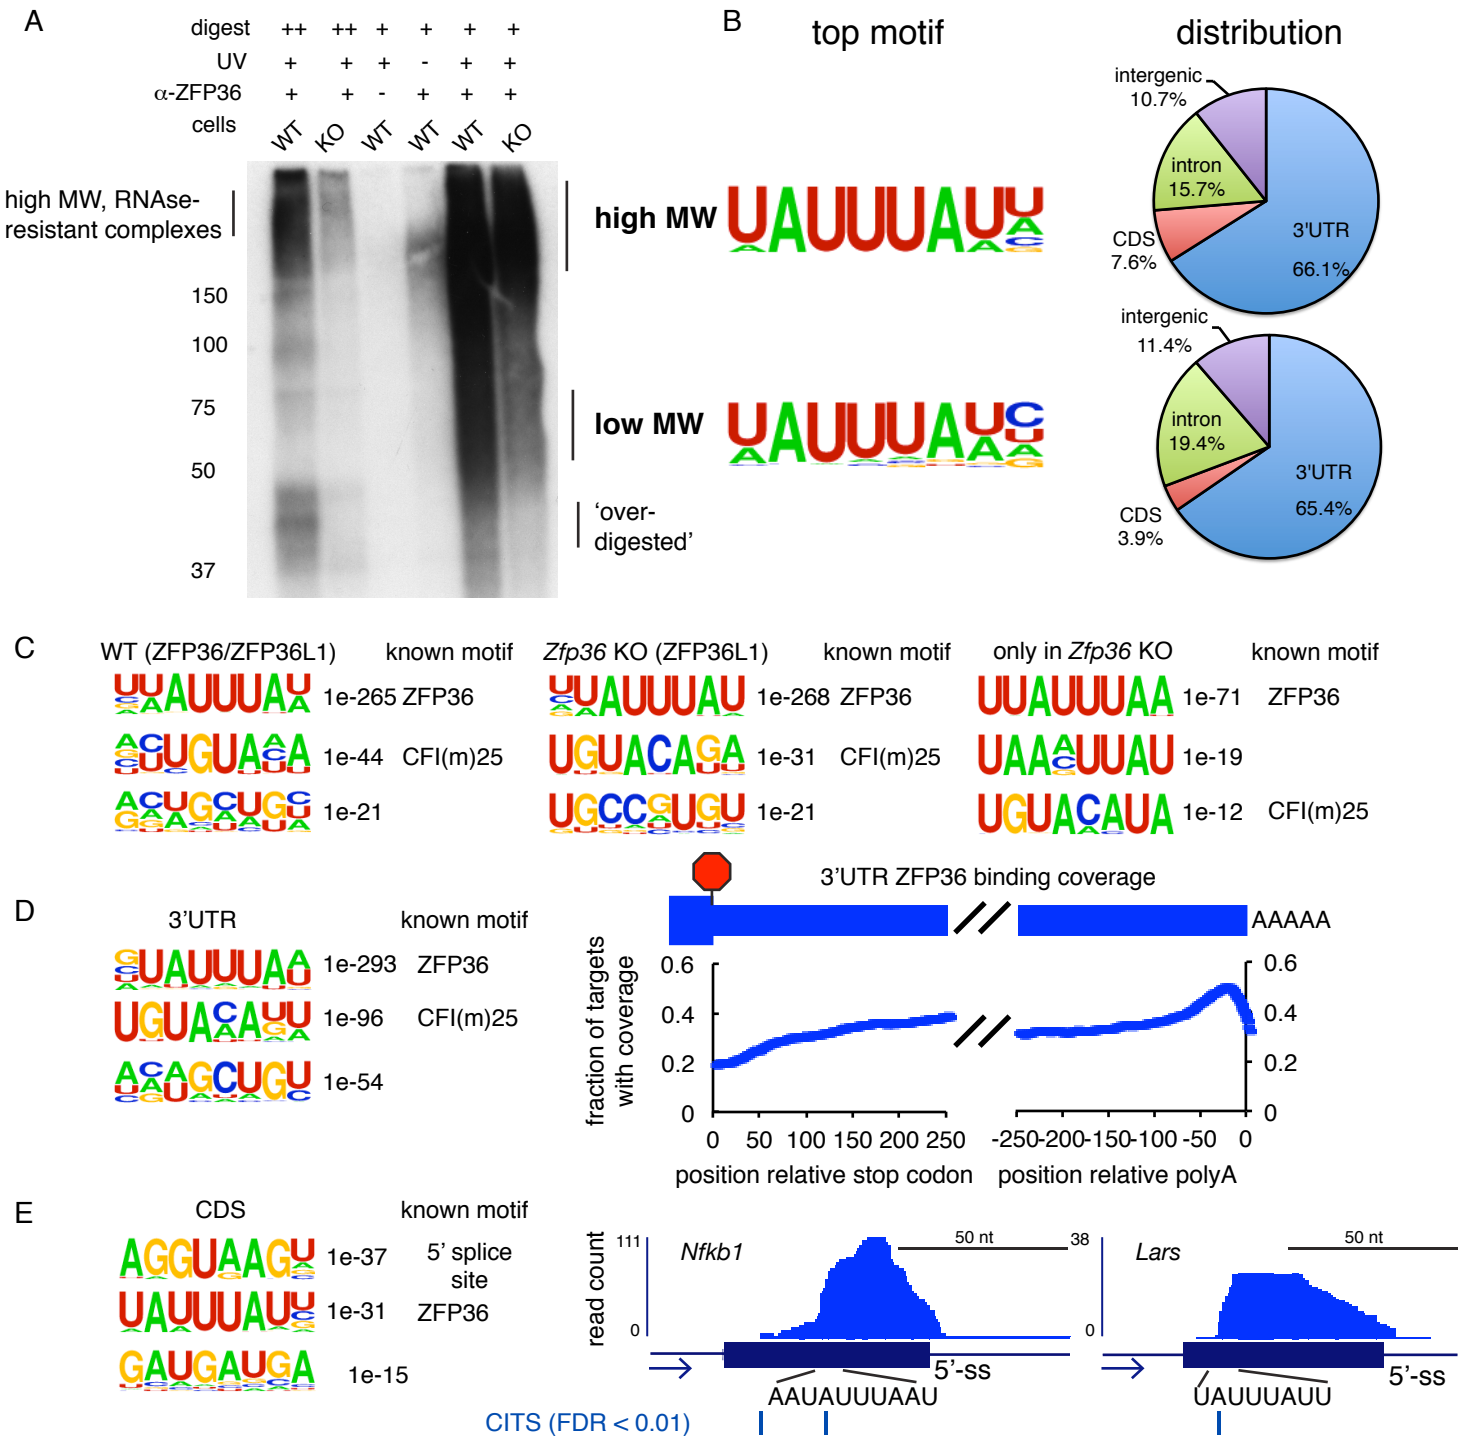

Supplement: supp [file elife_poa_e33057_Figure_1_figure_supplement_2.pdf › elife_poa_e33057_Figure_1_figure_supplement_2.pdf]

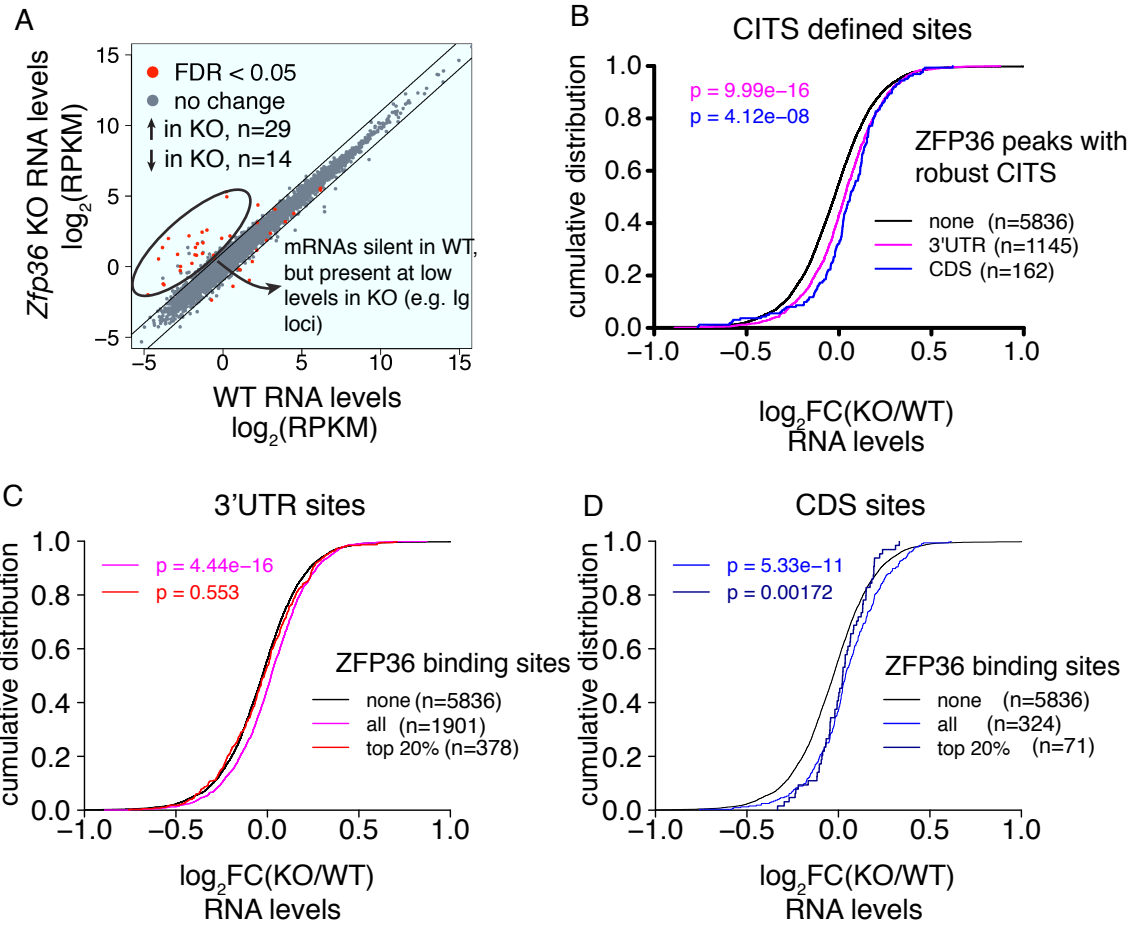

Supplement: supp [file elife_poa_e33057_Figure_1_figure_supplement_3.pdf › elife_poa_e33057_Figure_1_figure_supplement_3.pdf]

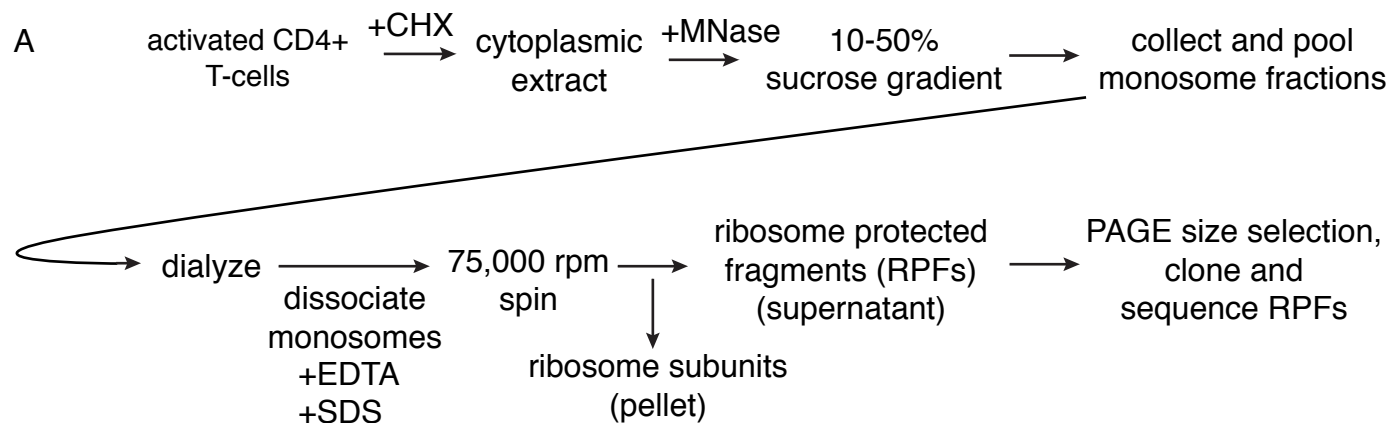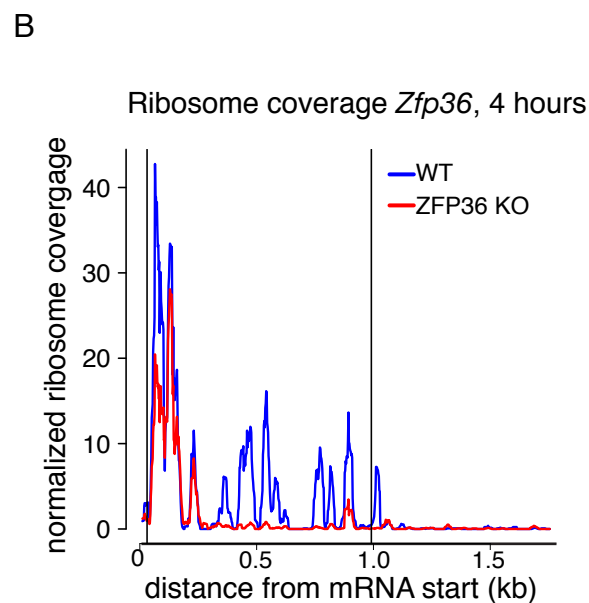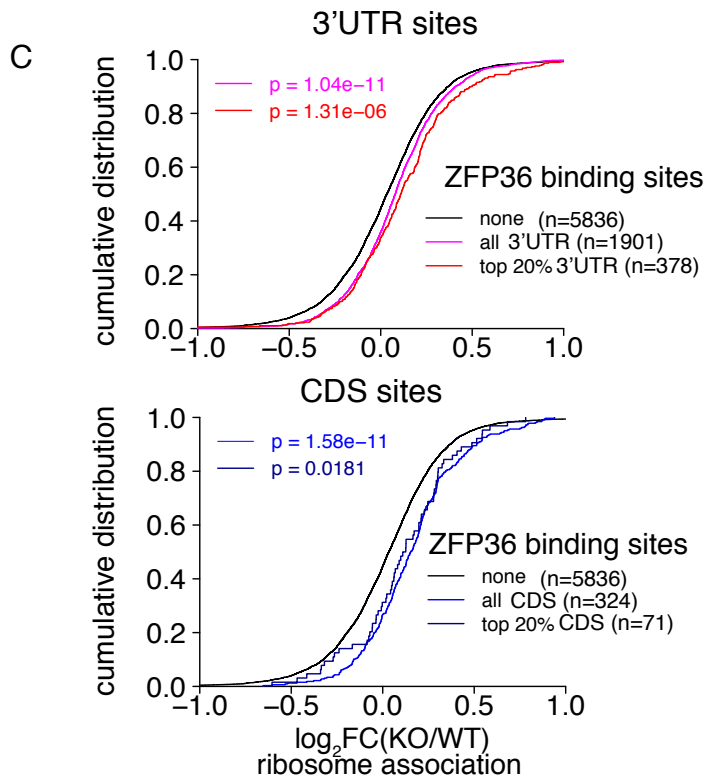

Supplement: supp [file elife_poa_e33057_Figure_3_figure_supplement_1.pdf › elife_poa_e33057_Figure_3_figure_supplement_1.pdf]

A top motifs

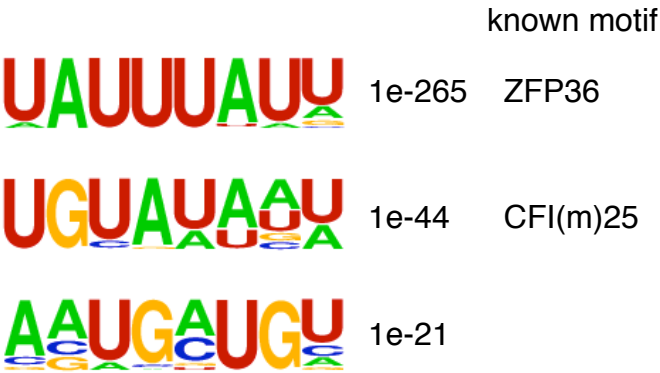

B distribution

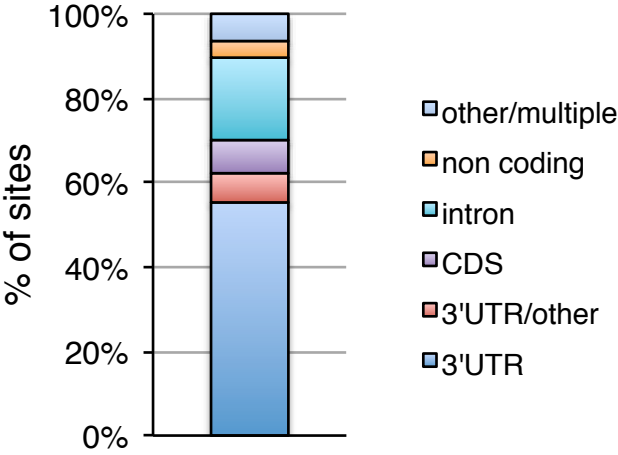

Supplement: supp [file elife_poa_e33057_Figure_6_figure_supplement_1.pdf › elife_poa_e33057_Figure_6_figure_supplement_1.pdf]
